# Supplementary material for: National and regional under-5 mortality rate by economic status for low-income and middle-income countries: a systematic assessment
Source: PubMed Central journal article supplement (PMC5905403; doi:10.1016/s2214-109x(18)30059-7), 2018-04-10

# THE LANCET

## Global Health

### Supplementary appendix

This appendix formed part of the original submission and has been peer reviewed. We post it as supplied by the authors.

Supplement to: Chao F, You D, Pedersen J, Hug L, Alkema L. National and regional under-5 mortality rate by economic status for low-income and middle-income countries: a systematic assessment. *Lancet Glob Health* 2018; **6**: e535–47.

# Web appendix

## National and regional under-5 mortality rate by economic status for low-income and middle-income countries: a systematic assessment

Fengqing Chao\* Danzhen You† Jon Pedersen‡ Lucia Hug† Leontine Alkema§

### Contents

|          |                                                                                                                                                  |           |
|----------|--------------------------------------------------------------------------------------------------------------------------------------------------|-----------|
| <b>1</b> | <b>Abbreviations</b>                                                                                                                             | <b>1</b>  |
| <b>2</b> | <b>Data</b>                                                                                                                                      | <b>1</b>  |
| <b>3</b> | <b>Method</b>                                                                                                                                    | <b>3</b>  |
| 3.1      | Wealth quintile-specific under-5 mortality rate model . . . . .                                                                                  | 3         |
| 3.2      | Data model . . . . .                                                                                                                             | 5         |
| 3.3      | Model summary . . . . .                                                                                                                          | 5         |
| 3.4      | Computation of final results . . . . .                                                                                                           | 6         |
| 3.4.1    | Constructing posterior samples of outcomes that include crisis-related deaths and uncertainty in national-level under-5 mortality rate . . . . . | 7         |
| 3.4.2    | Constructing uncertainty intervals and point estimates . . . . .                                                                                 | 7         |
| 3.4.3    | Imputing results for countries without data . . . . .                                                                                            | 8         |
| 3.4.4    | Computing aggregated results . . . . .                                                                                                           | 8         |
| 3.4.5    | Rounding . . . . .                                                                                                                               | 8         |
| 3.5      | Model validation . . . . .                                                                                                                       | 9         |
| <b>4</b> | <b>Validation results</b>                                                                                                                        | <b>9</b>  |
| 4.1      | Leaving out data based on survey year . . . . .                                                                                                  | 9         |
| 4.2      | Leaving out data randomly . . . . .                                                                                                              | 9         |
| <b>5</b> | <b>Supplementary Tables</b>                                                                                                                      | <b>12</b> |
| <b>6</b> | <b>Supplementary Figures</b>                                                                                                                     | <b>53</b> |

---

\*Institute of Policy Studies, Lee Kuan Yew School of Public Policy, National University of Singapore, Singapore 259599, Singapore.  
Email: chao.fengqing@nus.edu.sg

†Division of Data, Research, and Policy, United Nations Children’s Fund, New York, NY, USA

‡Fafo, Oslo, Norway

§Department of Biostatistics and Epidemiology, School of Public Health and Health Sciences, University of Massachusetts, Amherst, MA, USA

## List of Tables

|    |                                                                                                                                                                                                                        |    |
|----|------------------------------------------------------------------------------------------------------------------------------------------------------------------------------------------------------------------------|----|
| 1  | Distribution of observations by source type for each wealth quintile . . . . .                                                                                                                                         | 2  |
| 2  | Data availability by region and reference period . . . . .                                                                                                                                                             | 2  |
| 3  | Notation summary . . . . .                                                                                                                                                                                             | 6  |
| 4  | Validation results for left-out observations when leaving out data from 2012 and later survey years. . . . .                                                                                                           | 10 |
| 5  | Validation results for estimates when leaving out data from 2012 and later survey years. . . . .                                                                                                                       | 10 |
| 6  | Validation results for left-out observations when randomly leaving out 20% of all data. . . . .                                                                                                                        | 10 |
| 7  | Data availability for all the low-income and middle-income countries (excluding China) by region . . . . .                                                                                                             | 13 |
| 8  | Levels and trend in wealth quintile-specific under-5 mortality rate, by wealth quintile, for the 99 countries with empirical data . . . . .                                                                            | 14 |
| 9  | Number of wealth quintile-specific under-5 deaths, by wealth quintile, for all the low-income and middle-income countries (excluding China) combined, and by region and the 99 countries with empirical data . . . . . | 26 |
| 10 | Estimates and uncertainty intervals for inequality indexes, for the 99 countries with empirical data . . . . .                                                                                                         | 38 |
| 11 | Overview of data series by country . . . . .                                                                                                                                                                           | 41 |

## List of Figures

|    |                                                                                                                                                                                  |     |
|----|----------------------------------------------------------------------------------------------------------------------------------------------------------------------------------|-----|
| 1  | Sampling error distribution for full birth history and summary birth history data, by wealth quintile . . . . .                                                                  | 2   |
| 2  | 3rd quintile-disparity ratios against national-level under-5 mortality rate – data trend . . . . .                                                                               | 4   |
| 3  | B-splines used in the regression model for the expected 3rd quintile-disparity ratios . . . . .                                                                                  | 4   |
| 4  | 3rd quintile-disparity ratios against national-level under-5 mortality rate – model results . . . . .                                                                            | 54  |
| 5  | Country ranks for inequality indexes in 2016, for the 99 countries with empirical data . . . . .                                                                                 | 55  |
| 6  | Slope inequality index and concentration index in 2016, for the 99 countries with empirical data . . . . .                                                                       | 56  |
| 7  | Comparison between aggregated results based on the 137 low-income and middle-income countries, and the aggregated results based on the 99 countries with empirical data. . . . . | 57  |
| 8  | Aggregated under-5 mortality rate and percentage of under-5 deaths by wealth quintile, by region. . . . .                                                                        | 66  |
| 9  | Under-5 mortality rate by wealth quintile, for the 99 countries with empirical data. . . . .                                                                                     | 74  |
| 10 | Ratio of under-5 mortality rate in wealth quintile 1 (poorest) to wealth quintile 5 (richest), for the 99 countries with empirical data. . . . .                                 | 100 |
| 11 | All wealth quintile-specific results, for the 99 countries with empirical data. . . . .                                                                                          | 106 |

# 1 Abbreviations

|         |                                                                  |
|---------|------------------------------------------------------------------|
| DHS     | Demographic and Health Survey                                    |
| FBH     | Full Birth History                                               |
| LMICs   | Low-income and middle-income countries                           |
| LOESS   | Local Polynomial Regression                                      |
| MCMC    | Markov chain Monte Carlo                                         |
| MICS    | Multiple Indicator Cluster Survey                                |
| SBH     | Summary Birth History                                            |
| TSFB    | Time since first birth                                           |
| U5MR    | Under-5 mortality rate                                           |
| UN IGME | United Nations Inter-agency Group for Child Mortality Estimation |
| VR      | Vital Registration                                               |

## 2 Data

**Wealth quintiles** Wealth quintiles as constructed in our study refer to five equal-sized birth groups with different levels of economic status (from the poorest to the richest) according to the wealth index assigned to each household. The wealth index is computed based on selected questions asked in the Demographic and Health Surveys (DHSs) and Multiple Indicator Cluster Surveys (MICSs). The questions ask about living conditions and household assets, and assign a score based on different answers. The wealth index is calculated based on the weighted sum of those scores in order to give an indirect or approximate measure for living and wealth standards for each household (1). The division into wealth quintiles in our study uses the product of the sampling weight and the number of births to include equal numbers of births in each wealth quintile.

Under-5 mortality rates by wealth quintile are derived from DHSs and MICSs. Under-5 mortality rates in these survey programs are collected in two forms: the Full Birth History (FBH), whereby women are asked for the date of birth of each of their children, whether the child is still alive, and if not the age at death; and the Summary Birth History (SBH), whereby women are asked only about the number of their children ever born and the number that have died (or equivalently the number still alive). In general, the sampling error of the wealth quintile-specific data points from FBH is smaller than the sampling error from SBH, and hence more informative and assigned more weight in the estimation process. Figure 1 shows the distribution of the the sampling errors for the ratio of wealth quintile-specific under-5 mortality rate to the national-level under-5 mortality rate by wealth quintile group.

FBH data, collected by all DHSs and increasingly so by MICSs, allow the calculation of child mortality indicators for specific time periods in the past. We calculated wealth quintile-specific under-5 mortality rate in the five-year period before the survey. The reference year of the data from FBH represents the mid-point in a five-year interval.

For SBHs, the time since first birth was used as an indicator of exposure time in the model to estimate mortality indicators. For wealth quintile-specific under-5 mortality rates from SBHs the time period of five to nine years since the first birth of mothers has been used, and is called “time since first birth (TSFB)” method. This method of constructing the under-5 mortality rate has been used by the United Nations Children’s Fund since the 2014 round of estimation to replace the method which uses the age of the woman as an indicator of exposure time and exposure time period of the children to estimate mortality indicators. The main advantages of the new method (TSFB) over the previous method (using age of women) has been discussed in the Appendix of (2).

For wealth quintile-specific under-5 mortality rates, data are available for 99 low-income and middle-income countries (LMICs) with DHS and/or MICS surveys. Table 7 shows the data availability for all the LMICs (excluding China) by region and the World Bank income grouping. As of August 2017, the database contains 319 data series from DHS and MICS for LMICs. For each survey, we used one observation disaggregated by wealth quintile. In total, there are 1595 observations from LMICs, and the range of observed reference years (the mid-point of a five-year interval for FBH data) is 1987–2012. There are 41 surveys from 38 countries with reference year from 2010 onward. The percentage of the total number of under-5 deaths that were covered by the 38 countries with data since 2010 increased steadily from 32% in 1990 to 41% in 2016.

Table 1 summarizes the observations by source type for each wealth quintile group. Table 2 illustrates the percentage of countries with data for different reference periods among the 137 LMICs. Table 11 provides a full list of data series for the 99 countries.

| Data source type | Number of data series |
|------------------|-----------------------|
| DHS Direct       | 224                   |
| MICS Direct      | 29                    |
| MICS Indirect    | 66                    |
| <b>total</b>     | <b>319</b>            |

Table 1: **Distribution of observations by source type for each wealth quintile.** Observations are grouped by source type. “Direct” refers to observations obtained from full birth histories. “Indirect” refers to observations obtained from summary information and demographic methods. DHS: Demographic and Health Surveys; MICS: Multiple Indicator Cluster Surveys.

|                                            | 1990–1994 | 1995–1999 | 2000–2004 | 2005–2009 | 2010–2016 |
|--------------------------------------------|-----------|-----------|-----------|-----------|-----------|
| 137 low-income and middle-income countries | 19.0      | 40.9      | 48.2      | 41.6      | 27.7      |
| South Asia                                 | 25.0      | 37.5      | 50.0      | 62.5      | 37.5      |
| Eastern Europe and Central Asia            | 14.3      | 33.3      | 57.1      | 19.0      | 9.5       |
| Eastern and Southern Africa                | 25.0      | 62.5      | 58.3      | 62.5      | 45.8      |
| West and Central Africa                    | 25.0      | 75.0      | 79.2      | 66.7      | 45.8      |
| Latin America and Caribbean                | 26.9      | 30.8      | 26.9      | 23.1      | 23.1      |
| East Asia and Pacific (excluding China)    | 4.5       | 18.2      | 27.3      | 27.3      | 13.6      |
| Middle East and North Africa               | 8.3       | 8.3       | 33.3      | 41.7      | 16.7      |

Table 2: **Data availability by region and reference period (in %).** Percentages of countries with data among the 137 LMICs or within each region by reference period. Note: the reference year for FBH data refers to the mid-point of a five-year interval.

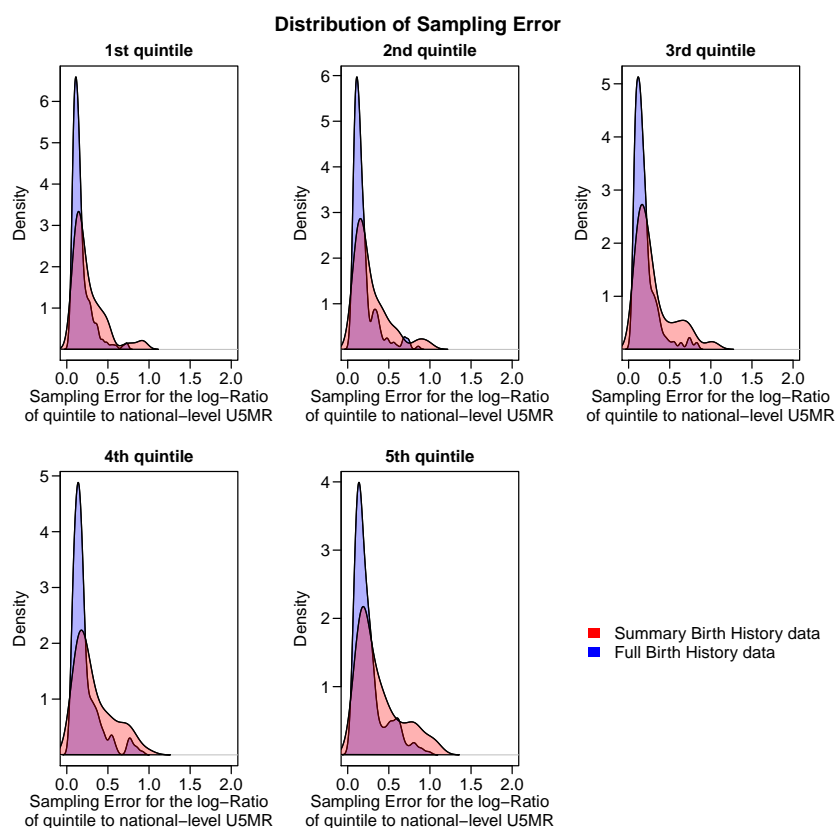

Figure 1: **Sampling error distribution for full birth history and summary birth history data, by wealth quintile.**

### 3 Method

Throughout the appendix, we use  $w$  as an index to denote the wealth quintile group  $w = 1, \dots, 5$ . In the appendix,  $Q$  refers to the under-5 mortality rate (U5MR).

#### 3.1 Wealth quintile-specific under-5 mortality rate model

Our goal is to estimate the wealth quintile-specific U5MR  $Q_{w,c,t}$  for wealth quintile  $w$ , country  $c$  and year  $t$ . The wealth quintile-specific U5MRs are assumed to relate to the national-level U5MR as follows:

$$\begin{aligned} Q(\text{total})_{c,t} &= D(\text{total})_{c,t}/B(\text{total})_{c,t}, \\ Q_{w,c,t} &= D_{w,c,t}/(B(\text{total})_{c,t}/5), \\ \frac{D(\text{total})_{c,t}}{B(\text{total})_{c,t}} &= \frac{\sum_{w=1}^5 D_{w,c,t}}{(B(\text{total})_{c,t}/5) \cdot 5}, \\ Q(\text{total})_{c,t} &= \sum_{w=1}^5 Q_{w,c,t}/5. \end{aligned}$$

$Q(\text{total})_{c,t}$  is the national-level U5MR,  $D(\text{total})_{c,t}$  is the total number of under-5 deaths,  $B(\text{total})_{c,t}$  is the total number of livebirths, and  $D_{w,c,t}$  is the number of under-5 deaths from the  $w$ -th wealth quintile group. All notations are referring to country  $c$  in year  $t$ .

In order to incorporate the constraint that the wealth quintile-specific U5MRs sum up to five times the national-level U5MR, we estimated the 3rd quintile-disparity ratios  $S_{w,c,t} = Q_{w,c,t}/Q_{3,c,t}$  for  $w = 1, 2, 4, 5$ . After estimating those ratios, the wealth quintile-specific U5MRs are recovered as functions of  $S_{w,c,t}$ 's:

$$\begin{aligned} Q_{3,c,t} &= 5 \cdot Q(\text{total})_{c,t}/(S_{1,c,t} + S_{2,c,t} + S_{4,c,t} + S_{5,c,t} + 1), \\ Q_{w,c,t} &= S_{w,c,t} \cdot Q_{3,c,t}, \text{ for } w = 1, 2, 4, 5. \end{aligned}$$

We used the 3rd wealth quintile group (i.e.  $w = 3$ ) as the reference group in the ratios because it is the group where we expected the proportion of deaths to be closest to 20%. National-level U5MR (excluding crisis-related deaths, i.e. crisis-free deaths) was used to predict the expected 3rd quintile-disparity ratios based on an expected (and empirically observed) relation between the ratios and national-level U5MR, using a flexible (penalized B-splines) regression model. Figure 2 shows the relationship between  $S_{w,c,t}$  and the crisis-free national-level U5MR  $Q(\text{total})_{c,t}$  for  $w = 1, 2, 4, 5$  in the four plots respectively. The national-level U5MR inputs  $Q(\text{total})_{c,t}$  used are the point estimates (excluding crisis-related under-5 deaths, and including HIV-related under-5 deaths) from the UN Inter-agency Group for Child Mortality Estimation (UN IGME) 2017 results (3). The LOESS (Local Polynomial Regression) curve in the 1st and 2nd plots increase as the national-level U5MR decreases, implying that as the national-level U5MR is decreasing, survival among children in the 3rd wealth quintile is improving more quickly as compared to survival among the poorest two groups. Similarly, the decreasing trend of the LOESS curve in the 4th plot indicate that as the national-level U5MR is declining over time, the decrease of the U5MR in the 4th richest wealth quintile is faster than that in the 3rd wealth quintile. For the richest wealth quintile, the LOESS curve suggests a survival advantage for children in the richest wealth quintile at any value of national-level U5MR, and the relative difference between the U5MR in the 5th and 3rd wealth quintile increases as the U5MR decreases until a national-level U5MR of about 50 deaths per 1000 livebirths, followed by a decrease of the relative difference.

The relation between national-level U5MR  $Q(\text{total})_{c,t}$  and  $S_{w,c,t}$  is incorporated into the model for  $S_{w,c,t}$ :

$$S_{w,c,t} = U_{w,c,t} \cdot P_{w,c,t}, \text{ for } w = 1, 2, 4, 5,$$

where  $U_{w,c,t}$  is the expected 3rd quintile-disparity ratio (as illustrated by the green LOESS curves in Figure 2) and  $P_{w,c,t}$  is a quintile-country-year-specific multiplier. The specification of  $U_{w,c,t}$  is explained in more detail below.

We used an AR(1) process to model the  $P_{w,c,t}$ 's on the log-scale:

$$\begin{aligned} \log(P_{w,c,t}) &\sim N(0, (1 - \rho_w^2)/\sigma_\epsilon^2), \text{ for } t = 1990, \\ \log(P_{w,c,t}) &\sim N(\rho_w \cdot \log(P_{w,c,t-1}), \sigma_\epsilon^2), \text{ for } t = 1991, \dots, 2016. \end{aligned}$$

$\rho_w$  is wealth quintile-specific autoregressive parameter constrained to be between 0 and 1, allowing for a wealth quintile-specific rate of convergence back to zero on the log-scale.  $\sigma_\epsilon^2$  is distortion variance.  $\rho_w$  for  $w = 1, 2, 4, 5$  and  $\sigma_\epsilon$  are assigned with vague priors.

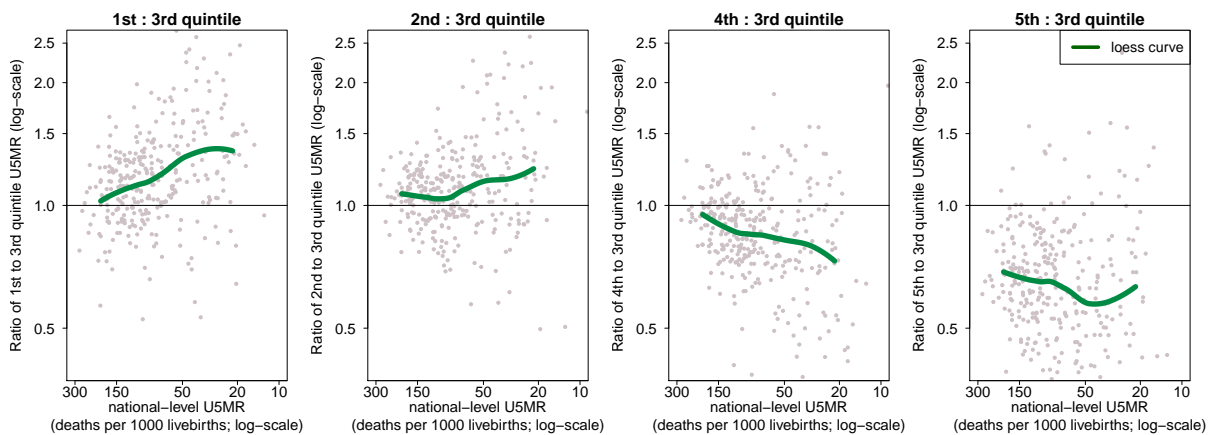

Figure 2: **3rd quintile-disparity ratios against national-level U5MR – data trend.** The grey dots are observed 3rd quintile-disparity ratios  $S_{w,c,t}$  (i.e.  $= Q_{w,c,t}/Q_{3,c,t}$ ) for  $w = 1, 2, 4, 5$  respectively for the four plots. The green curves are LOESS curves between the 5th and 95th percentiles of the national-level U5MR.

**Specification of the expected 3rd quintile-disparity ratio  $U_{w,c,t}$**  We used flexible penalized B-spline regression models (4; 5) to estimate the relation between national-level U5MR and the expected 3rd quintile-disparity ratios (based on data from the 95 LMICs), denoted by function  $f_w(\cdot)$ , for  $w = 1, 2, 4, 5$ . The function  $f_w(q)$  for some national-level U5MR value  $q$  was specified as follows:

$$f_w(q) = \sum_{k=1}^K B_k(q)\alpha_{w,k}, \text{ for } w = 1, 2, 4, 5,$$

where  $B_k(q)$  refers to the  $k$ -th B-spline evaluated at  $q$  and  $\alpha_{w,k}$  to the  $k$ -th spline coefficient for group  $w$ . We set:

$$\log(U_{w,c,t}) = f_w(\tilde{Q}(total)_{c,t}), \text{ for } w = 1, 2, 4, 5,$$

where  $\tilde{Q}(total)_{c,t}$  is the  $Q(total)_{c,t}$  rounded to three decimal places (to reduce the number of splines evaluations).

The B-splines used in the regression models are illustrated in Figure 3. We used symmetric third-order polynomials, equally spaced on the log-transformed national-level U5MR scale (knots are set to be 0.3 apart). The resulting splines add up to unity at any level of national-level U5MR. To avoid extreme extrapolations, splines are combined for national-level U5MR less than 20 deaths per 1000 livebirths, and for national-level U5MR greater than the 95-th percentile of  $Q(total)_{c,t}$ .

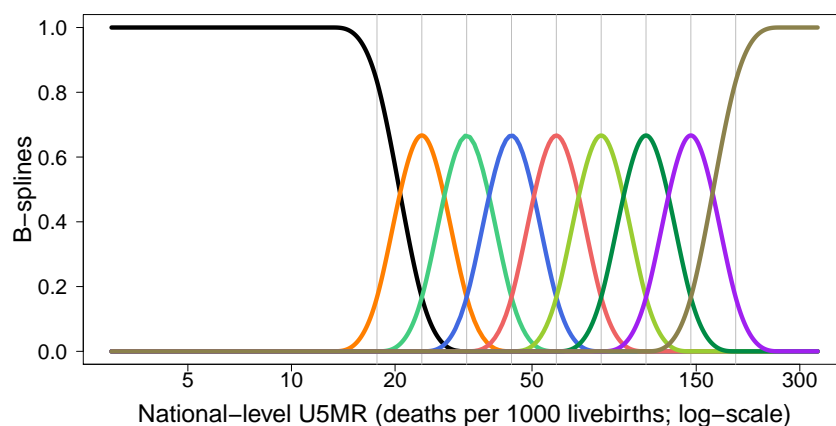

Figure 3: **B-splines used in the regression model for the expected 3rd quintile-disparity ratios.** B-splines plotted against the log-transformed national-level U5MR. The grey vertical lines indicate knots.

When fitting the splines model to observations, the first-order differences in adjacent splines coefficients were penalized to guarantee smoothness of the global relation between national-level mortality and expected ratios. The remainder of this subsection discusses the implementation details.

The splines regression model is specified as follows:

$$\begin{aligned} f_w(\tilde{q}) &= \tilde{B}\alpha_w, \\ \tilde{q} &= (q_1, \dots, q_j, \dots, q_J)'. \end{aligned}$$

$\tilde{\mathbf{q}}$  represents the vector of unique values  $\tilde{Q}(total)_{c,t}$  (rounded to three digits). Here,  $J = 334$  since there are 334 unique values for  $\tilde{Q}(total)_{c,t}$ .  $\tilde{\mathbf{B}} = \mathbf{B}(\tilde{\mathbf{q}})$  the matrix of splines evaluated at each entry of  $\tilde{\mathbf{q}}$ , and  $\boldsymbol{\alpha}_w$  the vector of splines coefficients with length equal to number of knots  $K$ . The splines equation can be written as follows (5; 6; 7):

$$\begin{aligned}\tilde{\mathbf{B}}\boldsymbol{\alpha}_w &= \beta_w + \mathbf{Z} \times \boldsymbol{\delta}_w, \\ \mathbf{Z} &= \tilde{\mathbf{B}}\mathbf{D}'(\mathbf{D}\mathbf{D}')^{-1}, \\ D_{i,j} &= \begin{cases} -1 & \text{if } i = j, \\ 1 & \text{if } i = j - 1, \\ 0 & \text{o.w.} \end{cases}\end{aligned}\quad (1)$$

where the difference matrix  $\mathbf{D}$  has dimension  $H \times K$ , with  $H = K - 1$ . The first part in Eq.(1),  $\beta_w$  describes the average constant level in the expected relative difference, and the second part  $\mathbf{Z} \times \boldsymbol{\delta}_w$  describes the fluctuations around the linear trend. The dimension of matrix  $\mathbf{Z}$  is  $J \times H$ .  $\boldsymbol{\delta}_w = (\delta_{w,1}, \dots, \delta_{w,H})'$ . The first-order differences are penalized by imposing:

$$\delta_{w,h} \sim N(0, \sigma_{\delta_w}^2), \text{ for } w = 1, 2, 4, 5, \text{ and } h = 1, \dots, H,$$

where variance  $\sigma_{\delta_w}^2$  determines the extent of smoothing. Vague prior distributions are used for the splines model parameters.

### 3.2 Data model

Instead of using the observed wealth quintile-specific U5MR in the data model, we used the observed ratio of wealth quintile-specific U5MR to the national-level U5MR. By using the ratio, the survey-level bias on national-level is cancelled out (8). The survey-level biases on national-level are the differences between national-level U5MR as measured in the survey and the UN IGME estimate of the U5MR for the corresponding country-year. Let  $r_{w,i} = q_{w,i}/q(total)_i$ , the  $i$ -th observed ratio of the  $w$ -th wealth quintile-specific U5MR to the national-level U5MR, which is from country  $c[i]$ , in year  $t[i]$ . The data model is:

$$\log(r_{w,i}) \sim N(\log(R_{w,c[i],t[i]}), \gamma_{w,i}^2),$$

where  $R_{w,c,t} = Q_{w,c,t}/Q(total)_{c,t}$ .  $\gamma_{w,i}^2$  is the sampling variance for the  $i$ -th observation. This variance term is computed from the micro data (following the methods described in (9)) and used as an input to the model.

### 3.3 Model summary

**Notations** Table 3 summarizes the notation and indexes used in Section 3.1 and Section 3.2.

| Symbol                   | Description                                                                                                                                                                                                       |
|--------------------------|-------------------------------------------------------------------------------------------------------------------------------------------------------------------------------------------------------------------|
| $t$                      | Indicator for year, $t = 1990, \dots, 2016$ .                                                                                                                                                                     |
| $c$                      | Indicator for country, $c = 1, \dots, 99$ .                                                                                                                                                                       |
| $w$                      | Indicator for wealth quintile groups, $w = 1, \dots, 5$ . $w = 1$ refers to the 1st (i.e. the poorest) wealth quintile group, and $w = 5$ refers to the 5th (i.e. the richest) wealth quintile group.             |
| $i$                      | Indicator for the $i$ -th observation within a certain wealth quintile group.                                                                                                                                     |
| $r_{w,i}$                | The $i$ -th observed ratio of the $w$ -th wealth quintile-specific U5MR to the national-level U5MR.                                                                                                               |
| $\gamma_{w,i}$           | The $i$ -th sampling error for $r_{w,i}$ .                                                                                                                                                                        |
| $q_{w,i}$                | The $i$ -th observed wealth quintile-specific U5MR from the $w$ -th wealth quintile group.                                                                                                                        |
| $q(total)_i$             | The $i$ -th national-level U5MR from DHS and MICS surveys.                                                                                                                                                        |
| $Q(total)_{c,t}$         | The crisis-free national-level U5MR for country $c$ year $t$ , is the point estimates (excluding crisis-related deaths) from the UN Inter-agency Group for Child Mortality Estimation (UN IGME) 2017 results (3). |
| $\tilde{Q}(total)_{c,t}$ | The $Q(total)_{c,t}$ rounded to three decimal places.                                                                                                                                                             |
| $Q_{w,c,t}$              | The crisis-free wealth quintile-specific U5MR (excluding crisis-related deaths) for wealth quintile $w$ , with $w = 1, \dots, 5$ , country $c$ in year $t$ .                                                      |

Continued on next page



**Table 3 – continued from previous page**

| Symbol              | Description                                                                                                                                                                                                    |
|---------------------|----------------------------------------------------------------------------------------------------------------------------------------------------------------------------------------------------------------|
| $S_{w,c,t}$         | The true 3rd quintile-disparity ratio (i.e. = $Q_{w,c,t}/Q_{3,c,t}$ ) of the U5MR from the $w$ -th wealth quintile to the 3rd wealth quintile for $w = 1, 2, 4, 5$ respectively, for country $c$ in year $t$ . |
| $U_{w,c,t}$         | The expected 3rd quintile-disparity ratio of the U5MR from the $w$ -th wealth quintile to the 3rd wealth quintile for $w = 1, 2, 4, 5$ respectively, for country $c$ in year $t$ .                             |
| $P_{w,c,t}$         | The relative difference between $S_{w,c,t}$ and $U_{w,c,t}$ for $w = 1, 2, 4, 5$ , for country $c$ in year $t$ .                                                                                               |
| $R_{w,c,t}$         | The ratio of the $w$ -th crisis-free wealth quintile-specific U5MR to the crisis-free national-level U5MR for country $c$ in year $t$ , i.e. = $Q_{w,c,t}/Q(total)_{c,t}$ .                                    |
| $\rho_w$            | Autoregressive parameter for AR(1) time series model for $\log(P_{w,c,t})$ , for $w = 1, 2, 4, 5$ .                                                                                                            |
| $\sigma_\epsilon^2$ | Variance of distortion terms in AR(1) time series model for $\log(P_{w,c,t})$ .                                                                                                                                |

**Table 3: Notation summary.**

### Wealth quintile-specific U5MR model

$$\begin{aligned}
 \log(r_{w,i}) &\sim N(\log(R_{w,c[i],t[i]}), \gamma_{w,i}^2), \text{ for } w = 1, \dots, 5, \\
 R_{w,c,t} &= Q_{w,c,t}/Q(total)_{c,t}, \text{ for } w = 1, \dots, 5, \\
 Q_{w,c,t} &= S_{w,c,t} \cdot Q_{3,c,t}, \text{ for } w = 1, 2, 4, 5, \\
 Q_{3,c,t} &= 5 \cdot Q(total)_{c,t}/(S_{1,c,t} + S_{2,c,t} + S_{4,c,t} + S_{5,c,t} + 1), \\
 S_{w,c,t} &= U_{w,c,t} \cdot P_{w,c,t}, \text{ for } w = 1, 2, 4, 5, \\
 \log(U_{w,c,t}) &= f_w(\tilde{Q}(total)_{c,t}), \text{ for } w = 1, 2, 4, 5, \\
 f_w(\tilde{\mathbf{q}}) &= \beta_w + \mathbf{Z} \times \boldsymbol{\delta}_w, \text{ for } w = 1, 2, 4, 5, \\
 \delta_{(w,h)} &\sim N(0, \sigma_{\delta_w}^2), \text{ for } w = 1, 2, 4, 5, \text{ and } h = 1, \dots, H, \\
 \log(P_{w,c,t}) &\sim N(0, (1 - \rho_w^2)/\sigma_\epsilon^2), \text{ for } w = 1, 2, 4, 5, \text{ for } t = 1990, \\
 \log(P_{w,c,t}) &\sim N(\rho_w \cdot \log(P_{w,c,t-1}), \sigma_\epsilon^2), \text{ for } w = 1, 2, 4, 5, \text{ for } t = 1991, \dots, 2016.
 \end{aligned}$$

**Prior distributions** Vague priors are assigned to hyper-parameters:

$$\begin{aligned}
 \beta_w &\sim U(-5, 5), \text{ for } w = 1, 2, 4, 5, \\
 \rho_w &\sim U(0, 1), \text{ for } w = 1, 2, 4, 5, \\
 \sigma_{\delta_w} &\sim U(0, 0.5), \text{ for } w = 1, 2, 4, 5, \\
 \sigma_\epsilon &\sim U(0, 0.5).
 \end{aligned}$$

**Computing** We obtained posterior samples of all the model parameters and hyper parameters using a Markov chain Monte Carlo (MCMC) algorithm, implemented in the open source softwares R 3.2.2 (10) and JAGS 4.0.1 (Just another Gibbs Sampler) (11), using R-packages coda (12), rjags (13), and R2jags (14). Results were obtained from 12 chains with a total number of 742,000 iterations in each chain, while the first 512,000 iterations were discarded as burn-in, and thinning for every 50 iterations, the final posterior sample size for each parameter is 5,520. Convergence of the MCMC algorithm and the sufficiency of the number of samples obtained were checked through visual inspection of trace plots and convergence diagnostics of Gelman and Rubin (15).

All the other R-packages used in this project are: classInt (16), doMC (17), foreign (18), foreach (19), ggplot2 (20), MCMCpack (21), RColorBrewer (22), scales (23), soiltexture (24), truncnorm (25), and xtable (26).

### 3.4 Computation of final results

Throughout the project, we presented our results in the format of “point estimate [lower bound; upper bound]”. E.g. the wealth quintile-specific U5MR and under-5 deaths are presented as  $Q_{w,c,t}^{P.E.}[Q_{w,c,t}^L; Q_{w,c,t}^U]$  and  $D_{w,c,t}^{P.E.}[D_{w,c,t}^L; D_{w,c,t}^U]$  respectively. The rest of this section will explain how we derived each of the components in the result.

### 3.4.1 Constructing posterior samples of outcomes that include crisis-related deaths and uncertainty in national-level under-5 mortality rate

To include crisis-related deaths in the crisis-free quintile-specific estimates obtained from the model, we followed the procedures used by the UN IGME for adjusting national-level U5MR (2; 3), based on the assumption that the crisis events have the same effect across wealth quintiles. In total, 18 different crises from nine countries were accounted for in the estimation of wealth quintile-specific U5MR. The  $g$ -th posterior sample for wealth quintile-specific U5MR including crisis-related deaths, denoted as  $Q(full)_{w,c,t}^{(g)}$ , is defined as follows:

$$Q(full)_{w,c,t}^{(g)} = \begin{cases} Q(\text{crisis-free})_{w,c,t}^{(g)} + Q(\text{crisis})_{c,t}, & \text{if affected by crisis} \\ Q(\text{crisis-free})_{w,c,t}^{(g)} & \text{o.w.} \end{cases}$$

where

$$Q(\text{crisis-free})_{w,c,t}^{(g)} = R_{w,c,t}^{(g)} \cdot Q(\text{total})_{c,t}^{(g)}.$$

$Q(\text{crisis-free})_{w,c,t}^{(g)}$  is the  $g$ -th posterior sample of crisis-free quintile-specific U5MR that includes uncertainty in national-level U5MR.  $R_{w,c,t}^{(g)}$  is the  $g$ -th posterior sample of the ratio of the crisis-free wealth quintile-specific U5MR to the crisis-free national-level U5MR obtained from the model.  $Q(\text{total})_{c,t}^{(g)}$  is the  $g$ -th trajectory of crisis-free national-level U5MR obtained from the UN IGME 2017 results (3), and is not part of this modelling process.

$Q(\text{crisis})_{c,t}$  is the country-year-specific national-level U5MR due to crisis. No uncertainty of crisis-related U5MR is included in the final adjusted wealth quintile-specific U5MR results.

Posterior samples for the ratio of wealth quintile-specific U5MR (with crisis-related deaths) to the national-level U5MR (with crisis-related deaths), inclusive of uncertainty in the national-level under-5 death (including crisis-related deaths), were given by:

$$R(full)_{w,c,t}^{(g)} = \frac{Q(full)_{w,c,t}^{(g)}}{Q(full)_{c,t}^{(g)}},$$

where  $Q(full)_{c,t}^{(g)}$  is the  $g$ -th trajectory of national-level U5MR (including crisis-related deaths). It is from the UN IGME 2017 results (3) and is not part of this modelling process.

Posterior samples for the number of under-5 deaths per wealth quintile (with crisis-related deaths)  $D(full)_{w,c,t}^{(g)}$ , inclusive of uncertainty in the national-level under-5 death (including crisis-related deaths), were obtained as follows:

$$D(full)_{w,c,t}^{(g)} = R(full)_{w,c,t}^{(g)} \cdot \frac{D(full)_{c,t}^{(g)}}{5}, \text{ for } w = 1, \dots, 5,$$

where  $D(full)_{c,t}^{(g)}$  is the  $g$ -th trajectory of number of national-level under-5 deaths (with crisis-related deaths). It is from the UN IGME 2017 results (3) and is not part of this modelling process.

### 3.4.2 Constructing uncertainty intervals and point estimates

The 90% uncertainty intervals for  $R(full)_{w,c,t}$ ,  $Q(full)_{w,c,t}$ , and  $D(full)_{w,c,t}$ , denoted as  $[*^L; *^U]$ , are the 5th and 95th percentiles of the corresponding posterior samples:

$$\begin{aligned} *^L &= \text{percentile}_{5\%} \left\{ *^{(1)}, \dots, *^{(G)} \right\}, \\ *^U &= \text{percentile}_{95\%} \left\{ *^{(1)}, \dots, *^{(G)} \right\}. \end{aligned}$$

where  $*$  can be substituted with  $R(full)_{w,c,t}$ ,  $Q(full)_{w,c,t}$ , and  $D(full)_{w,c,t}$ .

We constructed the point estimates of  $R(full)_{w,c,t}$  (denoted as  $R(full)_{w,c,t}^{P.E.}$ ) by re-scaling the medians of  $R(full)_{w,c,t}$  (denoted as  $R(full)_{w,c,t}^M$ ), such that  $R(full)_{w,c,t}^{P.E.}$  across wealth quintiles sum up to 5 for  $\forall c, \forall t$ :

$$R(full)_{w,c,t}^M = \text{median} \left\{ R(full)_{w,c,t}^{(1)}, \dots, R(full)_{w,c,t}^{(G)} \right\}, \text{ for } w = 1, \dots, 5,$$

where  $R(full)_{w,c,t}^{(g)}$  is the  $g$ -th posterior sample of  $R(full)_{w,c,t}$  as explained in above Section 3.4.1. Then we re-scaled each  $R(full)_{w,c,t}^M$  to  $R(full)_{w,c,t}^{P.E.}$  for  $w = 1, \dots, 5$ :

$$R(full)_{w,c,t}^{P.E.} = 5 \cdot \frac{R(full)_{w,c,t}^M}{\sum_{w=1}^5 R(full)_{w,c,t}^M}, \text{ for } \forall c, \forall t.$$

The point estimates  $R(full)_{w,c,t}^{P.E.}$  are combined with the point estimates of national-level U5MR  $Q(full)_{c,t}^{P.E.}$  and number of national-level under-5 deaths  $D(full)_{c,t}^{P.E.}$  (both include crisis-related deaths and were obtained from the UN IGME 2017 results (3), not part of the modelling process) to derive the point estimates of quintile-specific U5MR  $Q(full)_{w,c,t}^{P.E.}$  and point estimates of under-5 deaths  $D(full)_{w,c,t}^{P.E.}$ :

$$\begin{aligned} Q(full)_{w,c,t}^{P.E.} &= R(full)_{w,c,t}^{P.E.} \cdot Q(full)_{c,t}^{P.E.}, \\ D(full)_{w,c,t}^{P.E.} &= R(full)_{w,c,t}^{P.E.} \cdot \frac{D(full)_{c,t}^{P.E.}}{5}. \end{aligned}$$

### 3.4.3 Imputing results for countries without data

38 out of the 137 LMICs do not have wealth quintile-specific data. For these countries, the results were imputed as follows. Firstly, we imputed  $\log(P_{w,c,t})$  for any country without data based on the posterior samples of parameters related to the multiplier. Let  $P_{w,c,t}^{(g)}$  be the  $g$ -th imputed sample for country  $c$  without data in time  $t$ , and  $\sigma_\epsilon^{(g)}$ ,  $\rho^{(g)}$  be the  $g$ -th posterior sample from the model:

$$\begin{aligned} \log(P_{w,c,t}^{(g)}) &\sim N\left(0, \frac{(\sigma_\epsilon^{(g)})^2}{1 - (\rho^{(g)})^2}\right), \text{ for } t = 1990, \\ \log(P_{w,c,t}^{(g)}) &= \rho_w^{(g)} \cdot \log(P_{w,c,t-1}^{(g)}) + \epsilon_{c,t}^{(g)}, \text{ for } w = 1, 2, 4, 5, \text{ for } t = 1991, \dots, 2016, \\ \text{where} \\ \epsilon_{c,t}^{(g)} &\sim N(0, (\sigma_\epsilon^{(g)})^2), \text{ for } t = 1991, \dots, 2016. \end{aligned}$$

Secondly, for a given country-year, the crisis-free national-level U5MR (rounded to three digits) was used to identify the posterior samples of  $\log(U_{w,c,t})$

$$\log(U_{w,c,t}^{(1,\dots,G)}) = f_w(\tilde{Q}(total)_{c,t}), \text{ for } w = 1, 2, 4, 5.$$

Hence, we computed the imputed  $S_{w,c,t}^{(g)} = P_{w,c,t}^{(g)} \cdot U_{w,c,t}^{(g)}$ . We then followed the same steps as described in Section 3.4.1 and Section 3.4.2 to calculate the uncertainty intervals and point estimates of wealth quintile-specific U5MR and under-5 deaths.

### 3.4.4 Computing aggregated results

The 137 countries were LMICs based on the World Bank country income classification\* in 2016. We did not include China. The 137 LMICs are listed in Table 7 by region and data availability. The wealth quintile-specific under-5 deaths from region  $r$  for the  $w$ -th wealth quintile group for year  $t$ , denoted by  $DR_{w,r,t}$ , was computed as:

$$DR_{w,r,t} = \sum_{c \in \{region[c]=r\}} D(full)_{w,c,t}, \text{ for } w = 1, \dots, 5.$$

The wealth quintile-specific U5MR from region  $r$  for the  $w$ -th wealth quintile group for year  $t$ , denoted by  $QR_{w,r,t}$ , was computed as:

$$\begin{aligned} QR_{w,r,t} &= QR(full)_{r,t} \cdot \frac{DR_{w,r,t} \cdot 5}{DR(full)_{r,t}}, \text{ for } w = 1, \dots, 5, \\ \text{where} \\ DR(full)_{r,t} &= \sum_{c \in \{region[c]=r\}} D(full)_{c,t}. \end{aligned}$$

$QR(full)_{r,t}$  is the aggregated U5MR from region  $r$  in year  $t$  from the UN IGME 2017 results (3).

### 3.4.5 Rounding

We kept three significant figures for all reported estimates and uncertainty intervals, including those for the number of wealth quintile-specific under-5 deaths.

\*The World Bank country classification based on income can be downloaded at: <https://datahelpdesk.worldbank.org/knowledgebase/articles/906519-world-bank-country-and-lending-groups>

### 3.5 Model validation

Model performance was assessed through out-of-sample validation. In the first exercise, we left out all observations that were obtained after a certain survey year leaving out around 20% observations (27). Based on the current database, all data that were collected in the year 2012 and onward were left out. We fitted the model to the training data set, and obtained point estimates and uncertainty intervals that would have been constructed based on the available data set in the year 2011. We also assessed the model performance using the traditional approach of leaving out data at random, i.e. leaving out 20% of the data randomly, and repeated this exercise 30 times.

We calculated median errors and median absolute errors for the left-out observations, where errors are defined as  $e_{a,i} = r_{w,i} - \hat{r}_{w,i}$ , with  $\hat{r}_{w,i}$  the posterior median of the predictive distribution based on training data set for the left-out observation  $r_{w,i}$ . Coverage is given by  $1/n \cdot \sum 1[r_{w,i} \geq l_{w,i}] \cdot 1[r_{w,i} \leq u_{w,i}]$ , where  $n$  refers to the number of left-out observations, and  $l_{w,i}$  and  $u_{w,i}$  correspond to the lower and upper bounds of the respective prediction interval for the left-out observation  $r_{w,i}$ . The validation measures were calculated for 100,000 sets of left-out observations, where each set consisted of only one randomly selected left-out observation from each country. The reported validation results were based on the mean of the outcomes from the 100,000 sets of left-out observations for the validation exercise based on leaving out recent data, and the mean of the 100,000 times 30 training-set specific outcomes for the exercise with randomly left-out data.

For the validation based on leaving out recent data only, point estimates based on the full data set were compared to point estimates and uncertainty intervals obtained from the training data set. For this calculation, errors are defined as  $e_{w,c,t} = R_{w,c,t} - R_{w,c,t}^{(train)}$ , where  $R_{w,c,t}$  is the posterior median for country  $c$  in year  $t$  for the  $w$ -th wealth quintile based on the full data set, and  $R_{w,c,t}^{(train)}$  is the posterior median for the same country-year and wealth quintile based on the training data set. Coverage was computed in a similar manner as for the left-out observations, based on the lower and upper bounds of the 95% uncertainty interval of  $R_{w,c,t}^{(train)}$  from the training data set.

## 4 Validation results

### 4.1 Leaving out data based on survey year

We left out all observations collected since the year 2012: 310 observations were left out, corresponding to 19.4% of all observations. Table 4 summarizes the results related to the left-out observations for the validation exercise based on 90% and 80% prediction intervals (PIs). Median errors were very close to zero for left-out observations in all the wealth quintile groups. Coverage of 90% PIs were higher than expected: 98.2%, 98.2%, 98.2%, 94.6%, 94.6% for the 5 wealth quintiles respectively. Coverage of 80% PIs were higher than expected at 94.6%, 96.4%, 95.5%, 83.9%, and 87.5%. Hence, PIs are conservative, meaning that they contain the truth more often than expected, with only one exception: observations of  $q_1/q_5$  fall below their respective uncertainty interval slightly more often than expected (7.1% of the left out observations fall below their respective 90% PI, as compared to the expected 5%, and 14.3% fall below their respective 80% PI, as compared to the expected 10%). This implies that the lower bound of the uncertainty intervals based on model-based extrapolations after the most recent data point may be too high for the ratio  $q_1/q_5$ .

Table 5 shows the results for the comparison between estimates obtained from the full data set, and estimates based on the training set. Median errors were close to zero. The proportion of updated estimates that fell outside the uncertainty intervals constructed based on the training set was well below 5%, as desired.

Given that the median errors are close to zero in both Table 4 and Table 5, the point forecasts for quintile-specific U5MR and the ratio  $q_1/q_5$  are unbiased.

### 4.2 Leaving out data randomly

Table 6 shows the results of the validation exercises whereby data were left out at random. Median errors are close to zero for all the wealth quintile groups. The proportions of left-out data falling outside the 90% and 80% PIs are lower than expected for all the wealth quintile groups. This means that the PIs of the model are more conservative than expected. No systematic biases are observed for PIs.

|                                             | $r_1$     | $r_2$     | $r_3$     | $r_4$     | $r_5$     | $q_1/q_5$ |
|---------------------------------------------|-----------|-----------|-----------|-----------|-----------|-----------|
| Median of Error                             | -0.01     | -0.03     | -0.01     | 0.00      | 0.01      | -0.00     |
| Median of absolute Error                    | 0.13      | 0.09      | 0.09      | 0.11      | 0.10      | 0.44      |
| Left-out observations fall below 90% PI (%) | 1.8       | 1.8       | 1.8       | 0.0       | 1.8       | 7.1       |
| Left-out observations fall above 90% PI (%) | 0.0       | 0.0       | 0.0       | 5.4       | 3.6       | 3.6       |
| <b>Expected proportions (%)</b>             | <b>5</b>  | <b>5</b>  | <b>5</b>  | <b>5</b>  | <b>5</b>  | <b>5</b>  |
| Left-out observations fall below 80% PI (%) | 5.4       | 1.8       | 3.6       | 5.4       | 7.1       | 14.3      |
| Left-out observations fall above 80% PI (%) | 0.0       | 1.8       | 0.9       | 10.7      | 5.4       | 7.1       |
| <b>Expected proportions (%)</b>             | <b>10</b> | <b>10</b> | <b>10</b> | <b>10</b> | <b>10</b> | <b>10</b> |

Table 4: **Validation results for left-out observations when leaving out data from 2012 and later survey years.** Errors are defined as the difference between a left-out observation and the posterior median of its predictive distribution obtained from the training set.

| Year                               | $R_1$     |           |           | $R_2$     |           |           | $R_3$     |           |           | $R_4$     |           |           | $R_5$     |           |           | $Q_1/Q_5$ |           |           |
|------------------------------------|-----------|-----------|-----------|-----------|-----------|-----------|-----------|-----------|-----------|-----------|-----------|-----------|-----------|-----------|-----------|-----------|-----------|-----------|
|                                    | 2005      | 2010      | 2013      | 2005      | 2010      | 2013      | 2005      | 2010      | 2013      | 2005      | 2010      | 2013      | 2005      | 2010      | 2013      | 2005      | 2010      | 2013      |
| Median of Error                    | 0.00      | 0.00      | 0.00      | -0.00     | 0.00      | 0.00      | -0.00     | -0.01     | -0.01     | 0.00      | 0.00      | 0.00      | -0.00     | -0.00     | -0.00     | 0.00      | 0.00      | 0.01      |
| Median of absolute Error           | 0.02      | 0.03      | 0.03      | 0.01      | 0.01      | 0.01      | 0.00      | 0.01      | 0.01      | 0.01      | 0.02      | 0.02      | 0.01      | 0.01      | 0.01      | 0.05      | 0.06      | 0.07      |
| Below 90% CI of validation run (%) | 0.0       | 1.0       | 1.0       | 0.0       | 0.0       | 0.0       | 0.0       | 0.0       | 0.0       | 0.0       | 0.0       | 0.0       | 1.0       | 1.0       | 1.0       | 0.0       | 0.0       | 0.0       |
| Above 90% CI of validation run (%) | 0.0       | 0.0       | 0.0       | 0.0       | 0.0       | 0.0       | 0.0       | 0.0       | 0.0       | 0.0       | 1.0       | 0.0       | 0.0       | 0.0       | 0.0       | 1.0       | 0.0       | 0.0       |
| <b>Expected proportions (%)</b>    | <b>≤5</b> | <b>≤5</b> | <b>≤5</b> | <b>≤5</b> | <b>≤5</b> | <b>≤5</b> | <b>≤5</b> | <b>≤5</b> | <b>≤5</b> | <b>≤5</b> | <b>≤5</b> | <b>≤5</b> | <b>≤5</b> | <b>≤5</b> | <b>≤5</b> | <b>≤5</b> | <b>≤5</b> | <b>≤5</b> |

Table 5: **Validation results for estimates when leaving out data from 2012 and later survey years.** Errors are defined as the differences between estimates based on the full dataset and the training set. The proportions refer to the proportions (%) of countries in which the median ratio estimates based on the full data set fall below or above their corresponding 90% uncertainty intervals based on the training dataset. The results are broken down by wealth quintile groups and year.

|                                             | $r_1$     | $r_2$     | $r_3$     | $r_4$     | $r_5$     | $q_1/q_5$ |
|---------------------------------------------|-----------|-----------|-----------|-----------|-----------|-----------|
| Median of Error                             | 0.00      | -0.01     | -0.01     | 0.00      | -0.01     | 0.05      |
| Median of absolute Error                    | 0.11      | 0.09      | 0.08      | 0.09      | 0.10      | 0.34      |
| Left-out observations fall below 90% PI (%) | 3.3       | 1.3       | 1.4       | 2.6       | 2.3       | 4.0       |
| Left-out observations fall above 90% PI (%) | 1.7       | 1.0       | 2.5       | 1.9       | 3.4       | 4.0       |
| <b>Expected proportions (%)</b>             | <b>5</b>  | <b>5</b>  | <b>5</b>  | <b>5</b>  | <b>5</b>  | <b>5</b>  |
| Left-out observations fall below 80% PI (%) | 5.9       | 5.1       | 3.8       | 8.2       | 6.5       | 10.1      |
| Left-out observations fall above 80% PI (%) | 4.0       | 3.7       | 5.5       | 4.8       | 5.6       | 8.2       |
| <b>Expected proportions (%)</b>             | <b>10</b> | <b>10</b> | <b>10</b> | <b>10</b> | <b>10</b> | <b>10</b> |

Table 6: **Validation results for left-out observations when randomly leaving out 20% of all data.** Errors are defined as the difference between a left-out observation and the posterior median of its predictive distribution.

## References

- [1] Shea Oscar Rutstein KJ. DHS Comparative Reports No 6: The DHS Wealth Index. ORC Macro; 2004.
- [2] You D, Hug L, Ejdemyr S, Idele P, Hogan D, Mathers C, et al. Global, regional, and national levels and trends in under-5 mortality between 1990 and 2015, with scenario-based projections to 2030: a systematic analysis by the UN Inter-agency Group for Child Mortality Estimation. *The Lancet*. 2015;386(10010):2275–2286.
- [3] UNICEF. UN Inter-agency group for Child Mortality Estimation. Levels & Trends in Child Mortality. Report 2017; 2017. Available from: [http://www.childmortality.org/files\\_v21/download/IGME%20report%202017%20child%20mortality%20final.pdf](http://www.childmortality.org/files_v21/download/IGME%20report%202017%20child%20mortality%20final.pdf).
- [4] Eilers PHC, Marx BD. Flexible Smoothing with B-splines and Penalties. *Statistical Science*. 1996;11(2):89–121.
- [5] Eilers PHC, Marx BD. Splines, knots, and penalties. *Wiley Interdisciplinary Reviews: Computational Statistics*. 2010 Nov;2(6):637–653. Available from: <http://doi.wiley.com/10.1002/wics.125>.
- [6] Currie ID, Durban M. Flexible smoothing with P-splines: a unified approach. *Statistical Modelling*. 2002 Dec;2(4):333–349. Available from: <http://smj.sagepub.com/content/2/4/333>.
- [7] Eilers PHC. Discussion of: Verbyla, A. P., B. R. Cullis, M. G. Kenward, and S. J. Welham. "The Analysis of Designed Experiments and Longitudinal Data Using Smoothing Splines.". *Journal of the Royal Statistical Society*. 1999;Series C(48):300–311.
- [8] Alkema L, New JR, et al. Global estimation of child mortality using a Bayesian B-spline bias-reduction model. *The Annals of Applied Statistics*. 2014;8(4):2122–2149.
- [9] Pedersen J, Liu J. Child mortality estimation: appropriate time periods for child mortality estimates from full birth histories. *PLoS medicine*. 2012;9(8):e1001289.
- [10] R Core Team. R: A Language and Environment for Statistical Computing. Vienna, Austria; 2015. Available from: <https://www.R-project.org/>.
- [11] Plummer M. JAGS: A Program for Analysis of Bayesian Graphical Models Using Gibbs Sampling. In: Proceedings of the 3rd International Workshop on Distributed Statistical Computing (DSC 2003), March 20-22, Vienna, Austria. ISSN 1609-395X. <http://mcmc-jags.sourceforge.net/>; 2003. .
- [12] Plummer M, Best N, Cowles K, Vines K. CODA: Convergence Diagnosis and Output Analysis for MCMC. *R News*. 2006;6(1):7–11. Available from: <http://CRAN.R-project.org/doc/Rnews/>.
- [13] Plummer M. rjags: Bayesian graphical models using MCMC; 2011. R package version 3-5. Available from: <http://CRAN.R-project.org/package=rjags>.
- [14] Su YS, Yajima M. R2jags: A Package for Running jags from R; 2011. R package version 0.02-17. Available from: <http://CRAN.R-project.org/package=R2jags>.
- [15] Gelman A, Rubin D. Inference from iterative simulation using multiple sequences. *Statistical Science*. 1992;7:457–511.
- [16] Bivand R. classInt: Choose Univariate Class Intervals; 2015. R package version 0.1-23. Available from: <https://CRAN.R-project.org/package=classInt>.
- [17] Analytics R, Weston S. doMC: Foreach Parallel Adaptor for 'parallel'; 2015. R package version 1.3.4. Available from: <http://CRAN.R-project.org/package=doMC>.
- [18] R Core Team. foreign: Read Data Stored by Minitab, S, SAS, SPSS, Stata, Systat, Weka, dBase, ...; 2016. R package version 0.8-67. Available from: <http://CRAN.R-project.org/package=foreign>.
- [19] Analytics R, Weston S. foreach: Provides Foreach Looping Construct for R; 2015. R package version 1.4.3. Available from: <http://CRAN.R-project.org/package=foreach>.
- [20] Wickham H. ggplot2: Elegant Graphics for Data Analysis. Springer-Verlag New York; 2009. Available from: <http://ggplot2.org>.
- [21] Martin AD, Quinn KM, Park JH. MCMCpack: Markov Chain Monte Carlo in R. *Journal of Statistical Software*. 2011;42(9):22. Available from: <http://www.jstatsoft.org/v42/i09/>.
- [22] Neuwirth E. RColorBrewer: ColorBrewer Palettes; 2014. R package version 1.1-2. Available from: <https://CRAN.R-project.org/package=RColorBrewer>.
- [23] Wickham H. scales: Scale Functions for Visualization; 2016. R package version 0.4.0. Available from: <https://CRAN.R-project.org/package=scales>.
- [24] Moeyls J. soiltexture: Functions for Soil Texture Plot, Classification and Transformation; 2016. R package version 1.4.1. Available from: <https://CRAN.R-project.org/package=soiltexture>.
- [25] Trautmann H, Steuer D, Mersmann O, Bornkamp B. truncnorm: Truncated normal distribution; 2014. R package version 1.0-7. Available from: <http://CRAN.R-project.org/package=truncnorm>.
- [26] Dahl DB. xtable: Export Tables to LaTeX or HTML; 2016. R package version 1.8-2. Available from: <http://CRAN.R-project.org/package=xtable>.
- [27] Alkema L, Wong MB, Seah PR. Monitoring progress towards Millennium Development Goal 4: a call for improved validation of under-5 mortality rate estimates. *Statistics, Politics and Policy*. 2012 Jun;3(2). Available from: <http://www.degruyter.com/view/j/spp.2012.3.issue-2/2151-7509.1043/2151-7509.1043.xml>.

## 5 Supplementary Tables

- Table 7: Data availability for all the LMICs (excluding China) by region;
- Table 8: Levels of and trends in wealth quintile-specific under-5 mortality rate, by wealth quintile, for the 99 countries with empirical data;
- Table 9: Number of wealth quintile-specific under-5 deaths, by wealth quintile, for all the LMICs (excluding China) combined, by region and the 99 countries with empirical data;
- Table 10: Estimates and uncertainty intervals for inequality indexes, for the 99 countries with empirical data;
- Table 11: Overview of data series by country.

Table 7: **Data availability for all the low-income and middle-income countries (excluding China) by region.** The 137 low-income and middle-income countries are used to generate aggregated results. For counties with data, model estimates are used. For counties without data, we imputed results. Countries are categorized by region. The red numbers in brackets represent the numbers of countries in each group.

| Region                                  | [99] Country with data (use model estimates)                                                                                                                                 |                                                                                                                                                                                                            | [38] Country without data (use model-based estimates) |                                                                                                                                                                          |
|-----------------------------------------|------------------------------------------------------------------------------------------------------------------------------------------------------------------------------|------------------------------------------------------------------------------------------------------------------------------------------------------------------------------------------------------------|-------------------------------------------------------|--------------------------------------------------------------------------------------------------------------------------------------------------------------------------|
|                                         | [30] Low income                                                                                                                                                              | [69] Middle income                                                                                                                                                                                         | [1] Low income                                        | [37] Middle income                                                                                                                                                       |
| South Asia                              | [2] Afghanistan; Nepal                                                                                                                                                       | [5] Bangladesh; Bhutan; India; Maldives; Pakistan                                                                                                                                                          | [0]                                                   | [1] Sri Lanka                                                                                                                                                            |
| Eastern Europe and Central Asia         | [0]                                                                                                                                                                          | [15] Albania; Armenia; Azerbaijan; Belarus; Georgia; Kazakhstan; Kyrgyzstan; Republic of Moldova; The former Yugoslav Republic of Macedonia; Serbia; Tajikistan; Turkmenistan; Turkey; Ukraine; Uzbekistan | [0]                                                   | [6] Bulgaria; Bosnia and Herzegovina; Croatia; Montenegro; Romania; Russian Federation                                                                                   |
| Eastern and Southern Africa             | [13] Burundi; Comoros; Eritrea; Ethiopia; Madagascar; Mozambique; Malawi; Rwanda; Somalia; South Sudan; United Republic of Tanzania; Uganda; Zimbabwe                        | [8] Angola; Kenya; Lesotho; Namibia; Sudan; Swaziland; South Africa; Zambia                                                                                                                                | [0]                                                   | [3] Botswana; Djibouti; Mauritius                                                                                                                                        |
| West and Central Africa                 | [14] Benin; Burkina Faso; Central African Republic; Democratic Republic of the Congo; Guinea; Gambia; Guinea-Bissau; Liberia; Mali; Niger; Senegal; Sierra Leone; Chad; Togo | [9] Cote d'Ivoire; Cameroon; Congo; Gabon; Ghana; Equatorial Guinea; Mauritania; Nigeria; Sao Tome and Principe                                                                                            | [0]                                                   | [1] Cabo Verde                                                                                                                                                           |
| Latin America and Caribbean             | [1] Haiti                                                                                                                                                                    | [13] Belize; Bolivia (Plurinational State of); Brazil; Colombia; Dominican Republic; Guatemala; Guyana; Honduras; Nicaragua; Peru; Paraguay; El Salvador; Suriname                                         | [0]                                                   | [12] Argentina; Costa Rica; Cuba; Dominica; Ecuador; Grenada; Jamaica; Saint Lucia; Mexico; Panama; Saint Vincent and the Grenadines; Venezuela (Bolivarian Republic of) |
| East Asia and Pacific (excluding China) | [0]                                                                                                                                                                          | [10] Indonesia; Cambodia; Lao People's Democratic Republic; Myanmar; Mongolia; Philippines; Thailand; Timor-Leste; Viet Nam; Vanuatu                                                                       | [1] Democratic People's Republic of Korea             | [11] Fiji; Micronesia (Federated States of); Kiribati; Marshall Islands; Malaysia; Nauru; Papua New Guinea; Solomon Islands; Tonga; Tuvalu; Samoa                        |
| Middle East and North Africa            | [0]                                                                                                                                                                          | [9] Algeria; Egypt; Iraq; Jordan; Morocco; State of Palestine; Syrian Arab Republic; Tunisia; Yemen                                                                                                        | [0]                                                   | [3] Iran (Islamic Republic of); Lebanon; Libya                                                                                                                           |



**Table 8: Levels and trend in wealth quintile-specific under-5 mortality rate, by wealth quintile, for the 99 countries with empirical data.** Estimates and 90% uncertainty intervals for (i) wealth quintile-specific U5MR in 1990, 2000, and 2016, (ii) the absolute and percentage declines in the wealth quintile-specific U5MR from 1990 to 2016; (ii) ratio of wealth quintile-specific U5MR to the national-level U5MR per 1,000 in 1990, 2000, and 2016, and the change in the ratio from 1990 to 2016, by wealth quintile, for the 99 countries with empirical data. Numbers in brackets are 90% uncertainty intervals. Countries are ordered alphabetically.

|             | Wealth Quintile | wealth quintile-specific U5MR (deaths per 1000 livebirths) |                       |                     |                            |                              | Ratio of wealth quintile-specific to national-level U5MR |                     |                     |                      |  |
|-------------|-----------------|------------------------------------------------------------|-----------------------|---------------------|----------------------------|------------------------------|----------------------------------------------------------|---------------------|---------------------|----------------------|--|
|             |                 | 1990                                                       | 2000                  | 2016                | Absolute decline 1990–2016 | Percentage decline 1990–2016 | 1990                                                     | 2000                | 2016                | Change 1990–2016     |  |
| Afghanistan | 1st             | 201.9 (171.2 – 237.2)                                      | 156.0 (136.2 – 178.2) | 90.5 (71.2 – 112.3) | 111.3 (75.4 – 150.4)§      | 55.1% (42.0 – 66.0)§         | 1.14 (0.99 – 1.30)                                       | 1.20 (1.07 – 1.34)‡ | 1.29 (1.16 – 1.42)‡ | 0.15 (-0.03 – 0.32)  |  |
|             | 2nd             | 200.7 (176.1 – 228.2)                                      | 146.3 (129.9 – 164.0) | 80.8 (64.0 – 99.5)  | 119.9 (89.6 – 152.0)§      | 59.7% (48.9 – 69.0)§         | 1.13 (1.02 – 1.24)‡                                      | 1.13 (1.03 – 1.22)‡ | 1.15 (1.05 – 1.25)‡ | 0.02 (-0.12 – 0.15)  |  |
|             | 3rd             | 188.6 (168.8 – 210.1)                                      | 137.6 (124.8 – 151.5) | 73.1 (58.5 – 89.0)  | 115.5 (90.9 – 140.7)§      | 61.3% (51.6 – 69.7)§         | 1.06 (1.00 – 1.13)                                       | 1.06 (1.00 – 1.12)‡ | 1.04 (0.98 – 1.10)  | -0.03 (-0.10 – 0.05) |  |
|             | 4th             | 178.0 (152.9 – 205.7)                                      | 123.4 (108.5 – 140.0) | 62.1 (48.7 – 76.8)  | 115.9 (87.3 – 145.8)§      | 65.1% (55.1 – 73.4)§         | 1.00 (0.89 – 1.12)                                       | 0.95 (0.86 – 1.05)  | 0.88 (0.79 – 0.97)‡ | -0.12 (-0.25 – 0.01) |  |
|             | 5th             | 117.3 (96.5 – 142.0)                                       | 85.2 (72.6 – 99.5)    | 45.5 (35.3 – 57.6)  | 71.9 (49.5 – 97.0)§        | 61.2% (48.8 – 71.1)§         | 0.66 (0.56 – 0.78)‡                                      | 0.66 (0.57 – 0.75)‡ | 0.65 (0.56 – 0.74)‡ | -0.02 (-0.14 – 0.10) |  |
| Albania     | 1st             | 49.5 (39.5 – 60.1)                                         | 32.6 (25.6 – 40.6)    | 17.7 (9.3 – 33.2)   | 31.8 (14.1 – 43.9)§        | 64.3% (31.1 – 81.2)§         | 1.24 (1.03 – 1.45)‡                                      | 1.25 (1.04 – 1.47)‡ | 1.31 (1.08 – 1.56)‡ | 0.07 (-0.15 – 0.30)  |  |
|             | 2nd             | 47.5 (39.9 – 55.5)                                         | 30.6 (25.2 – 37.1)    | 15.8 (8.3 – 29.4)   | 31.7 (16.2 – 42.1)§        | 66.8% (36.7 – 82.4)§         | 1.19 (1.05 – 1.33)‡                                      | 1.18 (1.04 – 1.31)‡ | 1.17 (1.01 – 1.33)‡ | -0.02 (-0.19 – 0.15) |  |
|             | 3rd             | 40.8 (34.9 – 46.9)                                         | 26.5 (22.1 – 31.5)    | 13.7 (7.4 – 25.2)   | 27.2 (14.3 – 35.3)§        | 66.5% (36.8 – 82.0)§         | 1.02 (0.93 – 1.11)                                       | 1.02 (0.93 – 1.10)  | 1.01 (0.91 – 1.11)  | -0.01 (-0.10 – 0.08) |  |
|             | 4th             | 34.5 (28.5 – 41.2)                                         | 22.2 (17.9 – 27.5)    | 11.0 (5.8 – 20.8)   | 23.5 (12.3 – 31.5)§        | 68.1% (38.5 – 83.4)§         | 0.86 (0.75 – 0.98)‡                                      | 0.85 (0.74 – 0.98)‡ | 0.82 (0.67 – 0.97)‡ | -0.05 (-0.21 – 0.11) |  |
|             | 5th             | 27.8 (20.5 – 36.9)                                         | 18.1 (13.3 – 24.6)    | 9.4 (4.8 – 18.4)    | 18.4 (8.4 – 27.0)§         | 66.2% (34.2 – 82.5)§         | 0.69 (0.53 – 0.90)‡                                      | 0.70 (0.53 – 0.91)‡ | 0.70 (0.52 – 0.92)‡ | 0.00 (-0.13 – 0.14)  |  |
| Algeria     | 1st             | 63.7 (53.7 – 74.5)                                         | 52.3 (45.0 – 59.9)    | 33.9 (28.7 – 39.8)  | 29.8 (20.1 – 40.0)§        | 46.7% (35.6 – 55.7)§         | 1.30 (1.11 – 1.50)‡                                      | 1.32 (1.14 – 1.51)‡ | 1.35 (1.16 – 1.54)‡ | 0.05 (-0.16 – 0.25)  |  |
|             | 2nd             | 56.2 (49.0 – 63.6)                                         | 45.2 (40.2 – 50.3)    | 28.3 (24.5 – 32.4)  | 27.9 (20.5 – 35.3)§        | 49.7% (40.3 – 57.2)§         | 1.15 (1.02 – 1.28)‡                                      | 1.14 (1.02 – 1.26)‡ | 1.12 (1.00 – 1.25)  | -0.02 (-0.17 – 0.13) |  |
|             | 3rd             | 48.9 (43.6 – 53.9)                                         | 39.2 (35.8 – 42.5)    | 24.7 (22.0 – 27.6)  | 24.2 (19.0 – 29.0)§        | 49.4% (42.4 – 55.5)§         | 1.00 (0.92 – 1.08)                                       | 0.99 (0.91 – 1.07)  | 0.98 (0.90 – 1.06)  | -0.02 (-0.09 – 0.06) |  |
|             | 4th             | 41.6 (35.4 – 48.0)                                         | 33.7 (29.4 – 38.4)    | 21.1 (18.0 – 24.7)  | 20.5 (14.2 – 26.8)§        | 49.3% (38.0 – 57.8)§         | 0.85 (0.74 – 0.97)‡                                      | 0.85 (0.74 – 0.97)‡ | 0.84 (0.73 – 0.96)‡ | -0.01 (-0.15 – 0.12) |  |
|             | 5th             | 34.6 (26.9 – 44.0)                                         | 28.0 (22.4 – 34.8)    | 17.9 (14.0 – 22.6)  | 16.6 (10.3 – 23.9)§        | 48.1% (35.7 – 58.0)§         | 0.71 (0.56 – 0.89)‡                                      | 0.71 (0.57 – 0.88)‡ | 0.71 (0.56 – 0.89)‡ | 0.01 (-0.13 – 0.14)  |  |
| Angola      | 1st             | 232.3 (195.8 – 275.0)                                      | 217.5 (182.6 – 257.2) | 98.7 (48.5 – 178.6) | 133.6 (50.3 – 197.0)§      | 57.5% (22.7 – 79.2)§         | 1.05 (0.92 – 1.19)                                       | 1.05 (0.93 – 1.18)  | 1.20 (1.04 – 1.37)‡ | 0.15 (-0.02 – 0.32)  |  |
|             | 2nd             | 248.7 (215.0 – 287.1)                                      | 232.6 (199.0 – 270.5) | 94.3 (46.6 – 169.5) | 154.4 (74.5 – 214.3)§      | 62.1% (31.0 – 81.3)§         | 1.12 (1.02 – 1.22)‡                                      | 1.12 (1.03 – 1.22)‡ | 1.14 (1.03 – 1.26)‡ | 0.02 (-0.11 – 0.16)  |  |
|             | 3rd             | 234.0 (204.8 – 266.2)                                      | 219.1 (190.0 – 252.7) | 85.9 (42.5 – 153.4) | 148.1 (76.9 – 199.9)§      | 63.3% (34.0 – 81.8)§         | 1.06 (0.99 – 1.12)                                       | 1.06 (0.99 – 1.12)  | 1.04 (0.97 – 1.11)  | -0.02 (-0.09 – 0.06) |  |
|             | 4th             | 221.0 (188.8 – 257.4)                                      | 205.9 (174.7 – 241.7) | 72.6 (35.7 – 131.4) | 148.4 (84.5 – 197.3)§      | 67.1% (39.7 – 83.8)§         | 1.00 (0.89 – 1.10)                                       | 0.99 (0.90 – 1.09)  | 0.88 (0.78 – 0.98)‡ | -0.12 (-0.25 – 0.01) |  |
|             | 5th             | 171.0 (140.4 – 207.7)                                      | 160.0 (131.4 – 193.7) | 60.9 (29.4 – 112.6) | 110.1 (55.2 – 155.5)§      | 64.4% (34.0 – 82.9)§         | 0.77 (0.66 – 0.90)‡                                      | 0.77 (0.67 – 0.89)‡ | 0.74 (0.61 – 0.88)‡ | -0.03 (-0.17 – 0.10) |  |
| Armenia     | 1st             | 65.5 (53.9 – 77.8)                                         | 40.7 (33.3 – 48.3)    | 18.7 (13.4 – 26.2)  | 46.8 (34.6 – 59.4)§        | 71.4% (59.5 – 79.8)§         | 1.32 (1.11 – 1.53)‡                                      | 1.35 (1.15 – 1.56)‡ | 1.40 (1.15 – 1.66)‡ | 0.08 (-0.15 – 0.32)  |  |
|             | 2nd             | 58.1 (49.8 – 67.1)                                         | 34.9 (29.9 – 40.3)    | 15.4 (11.4 – 21.1)  | 42.7 (33.3 – 52.1)§        | 73.5% (62.9 – 80.7)§         | 1.17 (1.04 – 1.30)‡                                      | 1.16 (1.03 – 1.29)‡ | 1.15 (1.00 – 1.31)  | -0.02 (-0.19 – 0.15) |  |
|             | 3rd             | 50.2 (44.0 – 56.5)                                         | 30.0 (26.1 – 34.1)    | 13.3 (10.0 – 17.9)  | 36.9 (29.6 – 43.8)§        | 73.5% (63.7 – 80.4)§         | 1.01 (0.92 – 1.09)                                       | 1.00 (0.91 – 1.08)  | 0.99 (0.89 – 1.09)  | -0.02 (-0.11 – 0.08) |  |
|             | 4th             | 42.2 (35.5 – 49.3)                                         | 25.3 (21.1 – 29.8)    | 10.7 (7.6 – 14.8)   | 31.5 (24.1 – 39.0)§        | 74.7% (63.6 – 82.3)§         | 0.85 (0.74 – 0.97)‡                                      | 0.84 (0.72 – 0.96)‡ | 0.80 (0.65 – 0.95)‡ | -0.05 (-0.21 – 0.11) |  |
|             | 5th             | 32.5 (24.0 – 43.1)                                         | 19.7 (14.5 – 25.9)    | 8.9 (5.9 – 13.2)    | 23.6 (16.0 – 32.7)§        | 72.7% (60.6 – 81.0)§         | 0.65 (0.49 – 0.85)‡                                      | 0.65 (0.49 – 0.85)‡ | 0.66 (0.49 – 0.87)‡ | 0.01 (-0.13 – 0.15)  |  |
| Azerbaijan  | 1st             | 113.0 (94.5 – 133.3)                                       | 90.1 (74.9 – 107.2)   | 40.0 (23.5 – 69.4)  | 72.9 (40.0 – 97.3)§        | 64.6% (37.9 – 79.3)§         | 1.20 (1.03 – 1.37)‡                                      | 1.21 (1.05 – 1.39)‡ | 1.30 (1.10 – 1.50)‡ | 0.10 (-0.09 – 0.29)  |  |
|             | 2nd             | 107.8 (93.1 – 123.5)                                       | 86.1 (73.5 – 99.9)    | 36.3 (21.4 – 61.4)  | 71.5 (42.3 – 92.5)§        | 66.3% (41.6 – 80.2)§         | 1.14 (1.02 – 1.26)‡                                      | 1.16 (1.04 – 1.28)‡ | 1.17 (1.04 – 1.31)‡ | 0.03 (-0.12 – 0.18)  |  |
|             | 3rd             | 100.7 (88.9 – 113.4)                                       | 78.0 (67.8 – 89.2)    | 31.4 (18.9 – 53.4)  | 69.3 (44.2 – 86.3)§        | 68.8% (45.7 – 81.4)§         | 1.07 (0.99 – 1.14)                                       | 1.05 (0.97 – 1.13)  | 1.02 (0.93 – 1.10)  | -0.05 (-0.13 – 0.03) |  |
|             | 4th             | 86.7 (74.0 – 100.5)                                        | 67.7 (57.2 – 79.2)    | 26.7 (15.8 – 46.4)  | 60.0 (37.8 – 77.2)§        | 69.2% (45.9 – 81.9)§         | 0.92 (0.81 – 1.03)                                       | 0.91 (0.81 – 1.02)  | 0.86 (0.75 – 0.99)‡ | -0.05 (-0.19 – 0.09) |  |
|             | 5th             | 64.3 (49.6 – 82.0)                                         | 49.5 (37.9 – 63.7)    | 20.1 (11.3 – 36.2)  | 44.2 (25.4 – 61.4)§        | 68.7% (44.9 – 81.8)§         | 0.68 (0.53 – 0.85)‡                                      | 0.67 (0.52 – 0.84)‡ | 0.65 (0.50 – 0.83)‡ | -0.03 (-0.16 – 0.09) |  |
| Bangladesh  | 1st             | 172.9 (159.9 – 186.7)                                      | 111.4 (102.4 – 120.9) | 45.3 (38.7 – 52.5)  | 127.7 (113.3 – 142.2)§     | 73.8% (69.3 – 77.9)§         | 1.20 (1.12 – 1.29)‡                                      | 1.27 (1.18 – 1.37)‡ | 1.32 (1.18 – 1.47)‡ | 0.12 (-0.04 – 0.28)  |  |
|             | 2nd             | 166.0 (154.5 – 177.9)                                      | 99.2 (91.3 – 106.6)   | 40.0 (34.8 – 45.7)  | 126.0 (113.6 – 138.9)§     | 75.9% (72.1 – 79.3)§         | 1.15 (1.08 – 1.23)‡                                      | 1.13 (1.05 – 1.21)‡ | 1.17 (1.06 – 1.28)‡ | 0.01 (-0.11 – 0.14)  |  |
|             | 3rd             | 150.4 (141.9 – 158.8)                                      | 90.9 (85.5 – 96.3)    | 34.4 (30.5 – 38.6)  | 115.9 (106.5 – 124.9)§     | 77.1% (74.0 – 79.9)§         | 1.05 (1.00 – 1.09)                                       | 1.04 (0.99 – 1.09)  | 1.01 (0.94 – 1.07)  | -0.04 (-0.11 – 0.04) |  |
|             | 4th             | 133.6 (122.7 – 144.6)                                      | 77.8 (71.3 – 84.6)    | 29.2 (25.0 – 33.8)  | 104.4 (92.8 – 115.9)§      | 78.2% (74.2 – 81.6)§         | 0.93 (0.86 – 1.00)                                       | 0.89 (0.82 – 0.96)‡ | 0.85 (0.76 – 0.95)‡ | -0.08 (-0.19 – 0.04) |  |
|             | 5th             | 96.1 (87.2 – 105.6)                                        | 57.8 (52.2 – 63.5)    | 22.2 (18.6 – 26.3)  | 73.9 (64.4 – 83.6)§        | 76.9% (72.2 – 80.9)§         | 0.67 (0.61 – 0.73)‡                                      | 0.66 (0.60 – 0.72)‡ | 0.65 (0.56 – 0.75)‡ | -0.02 (-0.12 – 0.09) |  |
| Belarus     | 1st             | 20.9 (17.1 – 25.0)                                         | 17.7 (14.4 – 21.1)    | 5.4 (4.3 – 6.4)     | 15.5 (12.4 – 19.0)§        | 74.3% (70.3 – 78.1)§         | 1.37 (1.13 – 1.64)‡                                      | 1.38 (1.13 – 1.65)‡ | 1.38 (1.13 – 1.65)‡ | 0.00 (-0.19 – 0.19)  |  |
|             | 2nd             | 17.5 (15.1 – 20.2)                                         | 14.7 (12.6 – 16.9)    | 4.5 (3.8 – 5.2)     | 13.0 (10.9 – 15.3)§        | 74.4% (70.7 – 77.8)§         | 1.15 (0.99 – 1.32)                                       | 1.15 (0.99 – 1.32)  | 1.15 (1.00 – 1.32)  | 0.00 (-0.14 – 0.14)  |  |
|             | 3rd             | 15.3 (13.7 – 16.9)                                         | 12.9 (11.4 – 14.2)    | 3.9 (3.4 – 4.3)     | 11.4 (10.0 – 12.7)§        | 74.4% (72.1 – 76.8)§         | 1.00 (0.90 – 1.11)                                       | 1.00 (0.90 – 1.11)  | 1.00 (0.90 – 1.11)  | 0.00 (-0.07 – 0.07)  |  |
|             | 4th             | 12.2 (10.0 – 14.6)                                         | 10.3 (8.4 – 12.3)     | 3.1 (2.5 – 3.8)     | 9.1 (7.2 – 11.1)§          | 74.4% (70.4 – 78.3)§         | 0.81 (0.66 – 0.96)‡                                      | 0.80 (0.66 – 0.96)‡ | 0.80 (0.65 – 0.96)‡ | 0.00 (-0.12 – 0.11)  |  |
|             | 5th             | 10.1 (7.4 – 13.5)                                          | 8.5 (6.2 – 11.3)      | 2.6 (1.9 – 3.5)     | 7.5 (5.4 – 10.3)§          | 74.3% (69.2 – 79.0)§         | 0.66 (0.49 – 0.88)‡                                      | 0.66 (0.49 – 0.88)‡ | 0.66 (0.48 – 0.89)‡ | 0.00 (-0.12 – 0.12)  |  |

Continued on next page

‡: Ratio is significantly different from one.

§: Change/decline is significantly different from zero.

Absolute decline: wealth quintile-specific U5MR (1990) - wealth quintile-specific U5MR (2016).

Percentage decline: absolute decline over wealth quintile-specific U5MR (1990) × 100.

Change in ratio: ratio (2016) - ratio (1990).

Table 8 – continued from previous page

|                                  | Wealth Quintile | wealth quintile-specific U5MR (deaths per 1000 livebirths) |                       |                      |                            |                              | Ratio of wealth quintile-specific to national-level U5MR |                     |                     |                        |  |
|----------------------------------|-----------------|------------------------------------------------------------|-----------------------|----------------------|----------------------------|------------------------------|----------------------------------------------------------|---------------------|---------------------|------------------------|--|
|                                  |                 | 1990                                                       | 2000                  | 2016                 | Absolute decline 1990–2016 | Percentage decline 1990–2016 | 1990                                                     | 2000                | 2016                | Change 1990–2016       |  |
| Belize                           | 1st             | 51.2 (41.2 – 62.9)                                         | 32.4 (26.7 – 38.7)    | 20.5 (16.3 – 25.1)   | 30.8 (21.4 – 41.6)§        | 60.1% (49.4 – 68.4)§         | 1.31 (1.09 – 1.55)‡                                      | 1.34 (1.12 – 1.59)‡ | 1.37 (1.13 – 1.65)‡ | 0.06 (-0.17 – 0.31)    |  |
|                                  | 2nd             | 45.7 (38.4 – 54.0)                                         | 27.8 (24.1 – 31.9)    | 17.2 (14.4 – 20.2)   | 28.5 (21.2 – 36.5)§        | 62.4% (53.4 – 69.6)§         | 1.17 (1.04 – 1.31)‡                                      | 1.15 (1.02 – 1.29)‡ | 1.15 (1.00 – 1.32)  | -0.02 (-0.19 – 0.15)   |  |
|                                  | 3rd             | 39.5 (33.8 – 45.5)                                         | 24.3 (21.7 – 27.0)    | 15.0 (12.9 – 17.1)   | 24.5 (19.0 – 30.5)§        | 62.1% (54.7 – 68.3)§         | 1.01 (0.92 – 1.09)                                       | 1.01 (0.91 – 1.10)  | 1.00 (0.90 – 1.10)  | -0.01 (-0.10 – 0.08)   |  |
|                                  | 4th             | 33.0 (27.2 – 39.5)                                         | 20.1 (16.9 – 23.6)    | 12.0 (9.5 – 14.6)    | 21.0 (15.2 – 27.6)§        | 63.5% (53.8 – 72.1)§         | 0.85 (0.73 – 0.97)‡                                      | 0.83 (0.71 – 0.96)‡ | 0.81 (0.66 – 0.96)‡ | -0.04 (-0.21 – 0.11)   |  |
|                                  | 5th             | 25.6 (18.4 – 34.8)                                         | 15.9 (11.6 – 21.2)    | 9.8 (7.1 – 13.3)     | 15.8 (10.0 – 23.0)§        | 61.6% (50.4 – 70.3)§         | 0.66 (0.48 – 0.87)‡                                      | 0.66 (0.49 – 0.87)‡ | 0.66 (0.48 – 0.88)‡ | 0.00 (-0.13 – 0.15)    |  |
| Benin                            | 1st             | 198.8 (177.1 – 222.5)                                      | 164.5 (147.9 – 183.1) | 116.6 (86.6 – 161.5) | 82.2 (34.6 – 118.1)§       | 41.3% (18.3 – 56.9)§         | 1.11 (1.01 – 1.22)‡                                      | 1.14 (1.06 – 1.22)‡ | 1.19 (1.07 – 1.34)‡ | 0.08 (-0.08 – 0.24)    |  |
|                                  | 2nd             | 199.9 (180.5 – 220.9)                                      | 162.0 (146.6 – 179.2) | 112.3 (84.5 – 152.3) | 87.6 (44.0 – 121.4)§       | 43.8% (22.8 – 58.3)§         | 1.12 (1.03 – 1.21)‡                                      | 1.12 (1.05 – 1.20)‡ | 1.15 (1.04 – 1.26)‡ | 0.03 (-0.10 – 0.17)    |  |
|                                  | 3rd             | 193.2 (177.6 – 210.5)                                      | 158.2 (145.0 – 173.1) | 105.3 (79.8 – 142.8) | 87.9 (49.6 – 117.2)§       | 45.5% (26.0 – 58.7)§         | 1.08 (1.03 – 1.14)‡                                      | 1.10 (1.04 – 1.15)‡ | 1.08 (1.02 – 1.14)‡ | 0.00 (-0.08 – 0.07)    |  |
|                                  | 4th             | 172.4 (153.6 – 192.3)                                      | 136.4 (122.8 – 151.6) | 86.8 (64.8 – 120.4)  | 85.6 (49.1 – 114.7)§       | 49.6% (29.7 – 63.0)§         | 0.97 (0.88 – 1.06)                                       | 0.94 (0.88 – 1.02)  | 0.89 (0.79 – 0.99)‡ | -0.08 (-0.20 – 0.05)   |  |
|                                  | 5th             | 127.7 (111.3 – 146.9)                                      | 100.9 (88.7 – 114.4)  | 67.0 (48.9 – 93.8)   | 60.7 (32.4 – 85.2)§        | 47.5% (26.4 – 62.4)§         | 0.72 (0.63 – 0.81)‡                                      | 0.70 (0.63 – 0.77)‡ | 0.69 (0.58 – 0.80)‡ | -0.03 (-0.15 – 0.09)   |  |
| Bhutan                           | 1st             | 164.6 (135.2 – 200.3)                                      | 106.5 (89.0 – 126.7)  | 46.9 (32.0 – 66.5)   | 117.7 (84.0 – 154.9)§      | 71.5% (58.3 – 81.0)§         | 1.29 (1.09 – 1.50)‡                                      | 1.38 (1.18 – 1.59)‡ | 1.45 (1.23 – 1.68)‡ | 0.16 (-0.05 – 0.38)    |  |
|                                  | 2nd             | 143.8 (122.1 – 170.5)                                      | 88.2 (75.8 – 101.5)   | 37.4 (25.8 – 52.1)   | 106.5 (79.8 – 135.2)§      | 74.0% (62.4 – 82.6)§         | 1.13 (1.00 – 1.25)‡                                      | 1.14 (1.01 – 1.26)‡ | 1.15 (1.01 – 1.29)‡ | 0.03 (-0.13 – 0.18)    |  |
|                                  | 3rd             | 134.1 (116.6 – 155.7)                                      | 79.6 (70.2 – 90.0)    | 32.2 (22.4 – 44.5)   | 101.9 (80.1 – 125.9)§      | 76.0% (65.8 – 83.8)§         | 1.05 (0.97 – 1.13)                                       | 1.03 (0.95 – 1.10)  | 0.99 (0.91 – 1.08)  | -0.06 (-0.14 – 0.03)   |  |
|                                  | 4th             | 117.1 (98.2 – 140.7)                                       | 66.7 (56.2 – 78.1)    | 26.7 (18.1 – 37.6)   | 90.4 (69.1 – 114.8)§       | 77.2% (66.9 – 85.1)§         | 0.92 (0.80 – 1.05)                                       | 0.86 (0.75 – 0.97)‡ | 0.82 (0.71 – 0.94)‡ | -0.09 (-0.23 – 0.05)   |  |
|                                  | 5th             | 78.3 (58.1 – 104.8)                                        | 46.1 (34.4 – 60.5)    | 18.8 (11.9 – 28.7)   | 59.5 (40.2 – 84.1)§        | 76.0% (64.3 – 84.5)§         | 0.61 (0.46 – 0.79)‡                                      | 0.60 (0.45 – 0.76)‡ | 0.58 (0.44 – 0.76)‡ | -0.03 (-0.15 – 0.09)   |  |
| Bolivia (Plurinational State of) | 1st             | 170.8 (154.5 – 188.0)                                      | 113.8 (102.8 – 125.5) | 55.1 (37.4 – 78.1)   | 115.7 (88.9 – 138.9)§      | 67.7% (53.9 – 78.1)§         | 1.38 (1.27 – 1.49)‡                                      | 1.43 (1.32 – 1.53)‡ | 1.49 (1.31 – 1.68)‡ | 0.11 (-0.08 – 0.30)    |  |
|                                  | 2nd             | 143.0 (130.4 – 157.1)                                      | 95.8 (86.4 – 105.8)   | 43.8 (30.0 – 61.7)   | 99.1 (78.1 – 117.8)§       | 69.3% (56.6 – 79.1)§         | 1.15 (1.07 – 1.24)‡                                      | 1.20 (1.12 – 1.29)‡ | 1.19 (1.07 – 1.31)‡ | 0.03 (-0.11 – 0.17)    |  |
|                                  | 3rd             | 130.5 (120.5 – 140.9)                                      | 82.1 (75.2 – 89.5)    | 36.9 (25.6 – 51.9)   | 93.6 (76.8 – 108.5)§       | 71.7% (60.3 – 80.4)§         | 1.05 (1.00 – 1.11)                                       | 1.03 (0.97 – 1.09)  | 1.00 (0.93 – 1.07)  | -0.05 (-0.14 – 0.03)   |  |
|                                  | 4th             | 111.1 (99.8 – 122.9)                                       | 67.6 (60.1 – 75.4)    | 30.1 (20.5 – 42.9)   | 81.0 (64.3 – 95.5)§        | 72.9% (61.0 – 81.5)§         | 0.90 (0.82 – 0.98)‡                                      | 0.85 (0.77 – 0.93)‡ | 0.82 (0.72 – 0.92)‡ | -0.08 (-0.20 – 0.04)   |  |
|                                  | 5th             | 63.6 (55.4 – 72.5)                                         | 39.6 (34.5 – 45.3)    | 18.6 (12.4 – 27.1)   | 45.0 (34.0 – 55.2)§        | 70.8% (56.9 – 80.5)§         | 0.51 (0.45 – 0.58)‡                                      | 0.50 (0.44 – 0.56)‡ | 0.50 (0.42 – 0.60)‡ | -0.01 (-0.10 – 0.09)   |  |
| Brazil                           | 1st             | 93.9 (80.7 – 108.1)                                        | 53.9 (46.0 – 62.8)    | 23.1 (17.7 – 29.6)   | 70.9 (57.6 – 84.6)§        | 75.5% (68.5 – 81.2)§         | 1.46 (1.28 – 1.66)‡                                      | 1.51 (1.30 – 1.72)‡ | 1.53 (1.27 – 1.80)‡ | 0.06 (-0.18 – 0.32)    |  |
|                                  | 2nd             | 73.9 (65.1 – 83.2)                                         | 41.3 (36.0 – 46.5)    | 17.2 (13.5 – 21.6)   | 56.7 (47.3 – 66.2)§        | 76.8% (70.3 – 82.0)§         | 1.15 (1.03 – 1.27)‡                                      | 1.15 (1.02 – 1.28)‡ | 1.14 (0.98 – 1.30)  | -0.01 (-0.18 – 0.15)   |  |
|                                  | 3rd             | 64.2 (57.6 – 70.8)                                         | 35.1 (31.3 – 38.9)    | 14.8 (11.8 – 18.3)   | 49.4 (42.5 – 56.1)§        | 76.9% (71.4 – 81.7)§         | 1.00 (0.92 – 1.08)                                       | 0.98 (0.90 – 1.06)  | 0.98 (0.88 – 1.08)  | -0.02 (-0.11 – 0.07)   |  |
|                                  | 4th             | 52.6 (45.0 – 60.6)                                         | 28.7 (24.4 – 33.3)    | 11.7 (8.8 – 15.1)    | 40.9 (33.1 – 49.0)§        | 77.7% (70.7 – 83.4)§         | 0.82 (0.71 – 0.93)‡                                      | 0.80 (0.69 – 0.92)‡ | 0.78 (0.63 – 0.92)‡ | -0.04 (-0.20 – 0.11)   |  |
|                                  | 5th             | 36.4 (27.8 – 46.9)                                         | 20.1 (15.2 – 25.9)    | 8.7 (6.1 – 12.1)     | 27.6 (20.1 – 36.8)§        | 76.0% (68.0 – 82.1)§         | 0.57 (0.44 – 0.72)‡                                      | 0.56 (0.43 – 0.72)‡ | 0.58 (0.43 – 0.76)‡ | 0.01 (-0.10 – 0.14)    |  |
| Burkina Faso                     | 1st             | 208.4 (187.5 – 229.8)                                      | 189.5 (171.3 – 209.0) | 101.0 (75.5 – 133.6) | 107.4 (70.0 – 138.2)§      | 51.5% (35.0 – 63.7)§         | 1.05 (0.97 – 1.13)                                       | 1.05 (0.97 – 1.13)  | 1.19 (1.06 – 1.34)‡ | 0.14 (0.00 – 0.30)     |  |
|                                  | 2nd             | 220.6 (200.7 – 243.1)                                      | 206.4 (187.6 – 226.6) | 97.9 (74.8 – 127.9)  | 122.8 (88.4 – 153.0)§      | 55.6% (41.8 – 66.3)§         | 1.11 (1.03 – 1.19)‡                                      | 1.14 (1.07 – 1.22)‡ | 1.16 (1.06 – 1.27)‡ | 0.05 (-0.08 – 0.18)    |  |
|                                  | 3rd             | 213.9 (197.2 – 231.6)                                      | 193.0 (178.1 – 209.3) | 88.9 (68.4 – 114.7)  | 125.0 (96.3 – 150.7)§      | 58.4% (46.3 – 68.1)§         | 1.08 (1.03 – 1.13)‡                                      | 1.07 (1.02 – 1.12)‡ | 1.05 (0.99 – 1.11)  | -0.03 (-0.10 – 0.04)   |  |
|                                  | 4th             | 203.6 (184.1 – 224.8)                                      | 182.4 (165.2 – 201.6) | 75.8 (57.3 – 99.6)   | 127.7 (98.1 – 154.3)§      | 62.8% (50.3 – 72.0)§         | 1.03 (0.95 – 1.10)                                       | 1.01 (0.94 – 1.08)  | 0.90 (0.80 – 1.00)‡ | -0.13 (-0.25 – -0.01)§ |  |
|                                  | 5th             | 146.5 (131.0 – 163.5)                                      | 131.6 (117.4 – 146.9) | 59.5 (44.4 – 79.4)   | 87.1 (63.5 – 108.6)§       | 59.4% (45.6 – 70.0)§         | 0.74 (0.67 – 0.81)‡                                      | 0.73 (0.67 – 0.80)‡ | 0.70 (0.61 – 0.81)‡ | -0.04 (-0.14 – 0.08)   |  |
| Burundi                          | 1st             | 204.8 (172.8 – 241.5)                                      | 186.1 (159.2 – 218.0) | 94.5 (71.1 – 123.1)  | 110.4 (71.6 – 149.1)§      | 53.9% (38.4 – 65.8)§         | 1.20 (1.05 – 1.38)‡                                      | 1.23 (1.09 – 1.39)‡ | 1.32 (1.14 – 1.51)‡ | 0.11 (-0.08 – 0.30)    |  |
|                                  | 2nd             | 189.5 (164.3 – 215.8)                                      | 167.7 (145.9 – 191.1) | 82.0 (62.8 – 106.6)  | 107.5 (74.5 – 138.7)§      | 56.7% (42.0 – 67.5)§         | 1.11 (1.00 – 1.22)‡                                      | 1.11 (1.01 – 1.21)‡ | 1.14 (1.03 – 1.27)‡ | 0.03 (-0.11 – 0.17)    |  |
|                                  | 3rd             | 179.2 (158.7 – 200.3)                                      | 159.2 (141.1 – 178.8) | 74.0 (57.5 – 94.7)   | 105.1 (77.0 – 130.6)§      | 58.7% (46.0 – 68.3)§         | 1.05 (0.98 – 1.12)                                       | 1.05 (0.98 – 1.13)  | 1.03 (0.96 – 1.11)  | -0.02 (-0.09 – 0.05)   |  |
|                                  | 4th             | 164.2 (140.6 – 189.0)                                      | 142.4 (123.1 – 163.7) | 62.0 (47.4 – 81.5)   | 102.2 (73.6 – 130.2)§      | 62.2% (49.0 – 72.0)§         | 0.97 (0.86 – 1.08)                                       | 0.94 (0.84 – 1.04)  | 0.86 (0.76 – 0.97)‡ | -0.10 (-0.23 – 0.03)   |  |
|                                  | 5th             | 112.8 (90.8 – 138.6)                                       | 99.5 (81.6 – 121.4)   | 46.1 (33.7 – 62.7)   | 66.8 (44.3 – 91.3)§        | 59.2% (44.1 – 70.0)§         | 0.66 (0.54 – 0.80)‡                                      | 0.66 (0.55 – 0.78)‡ | 0.64 (0.52 – 0.79)‡ | -0.02 (-0.14 – 0.10)   |  |
| Cambodia                         | 1st             | 147.3 (129.2 – 166.8)                                      | 138.0 (122.7 – 154.5) | 42.8 (26.2 – 69.7)   | 104.5 (73.0 – 129.6)§      | 70.9% (51.9 – 82.4)§         | 1.27 (1.14 – 1.41)‡                                      | 1.29 (1.19 – 1.40)‡ | 1.40 (1.23 – 1.57)‡ | 0.13 (-0.07 – 0.33)    |  |
|                                  | 2nd             | 134.7 (119.5 – 150.6)                                      | 123.9 (110.5 – 138.2) | 36.5 (22.5 – 58.8)   | 98.2 (71.1 – 119.0)§       | 72.9% (55.5 – 83.4)§         | 1.16 (1.06 – 1.26)‡                                      | 1.16 (1.07 – 1.24)‡ | 1.19 (1.07 – 1.32)‡ | 0.03 (-0.12 – 0.19)    |  |
|                                  | 3rd             | 127.0 (115.5 – 139.1)                                      | 117.4 (106.5 – 129.3) | 31.8 (19.6 – 51.0)   | 95.2 (73.4 – 111.7)§       | 74.9% (59.6 – 84.6)§         | 1.09 (1.03 – 1.16)‡                                      | 1.10 (1.04 – 1.16)‡ | 1.04 (0.96 – 1.12)  | -0.05 (-0.14 – 0.03)   |  |
|                                  | 4th             | 110.5 (97.3 – 124.7)                                       | 100.5 (88.9 – 113.4)  | 26.3 (15.9 – 42.8)   | 84.1 (63.2 – 100.8)§       | 76.2% (60.8 – 85.6)§         | 0.95 (0.86 – 1.05)                                       | 0.94 (0.86 – 1.02)  | 0.86 (0.75 – 0.98)‡ | -0.09 (-0.23 – 0.05)   |  |
|                                  | 5th             | 61.0 (50.4 – 72.9)                                         | 55.3 (46.3 – 65.2)    | 15.5 (9.2 – 26.3)    | 45.4 (32.0 – 57.5)§        | 74.5% (57.2 – 84.7)§         | 0.53 (0.44 – 0.62)‡                                      | 0.52 (0.44 – 0.60)‡ | 0.51 (0.41 – 0.62)‡ | -0.02 (-0.12 – 0.09)   |  |
| Cameroon                         | 1st             | 185.6 (165.0 – 207.6)                                      | 205.8 (183.8 – 230.4) | 106.5 (79.8 – 142.2) | 79.1 (40.9 – 111.6)§       | 42.6% (23.4 – 57.4)§         | 1.30 (1.18 – 1.42)‡                                      | 1.24 (1.15 – 1.34)‡ | 1.34 (1.17 – 1.50)‡ | 0.04 (-0.14 – 0.22)    |  |
|                                  | 2nd             | 162.0 (145.9 – 179.9)                                      | 186.9 (167.8 – 207.4) | 90.4 (68.6 – 119.1)  | 71.6 (40.5 – 97.9)§        | 44.2% (26.0 – 57.6)§         | 1.13 (1.05 – 1.22)‡                                      | 1.13 (1.05 – 1.21)‡ | 1.13 (1.03 – 1.24)‡ | 0.00 (-0.13 – 0.13)    |  |
|                                  | 3rd             | 146.7 (133.6 – 160.5)                                      | 170.2 (154.4 – 187.1) | 81.2 (62.5 – 105.6)  | 65.6 (40.3 – 86.9)§        | 44.7% (28.1 – 57.5)§         | 1.03 (0.97 – 1.08)                                       | 1.03 (0.97 – 1.08)  | 1.02 (0.95 – 1.08)  | -0.01 (-0.08 – 0.07)   |  |
|                                  | 4th             | 128.0 (113.6 – 143.3)                                      | 156.0 (139.4 – 174.8) | 68.4 (51.8 – 90.6)   | 59.6 (34.5 – 80.9)§        | 46.6% (28.0 – 59.9)§         | 0.89 (0.81 – 0.98)‡                                      | 0.94 (0.87 – 1.02)  | 0.86 (0.76 – 0.96)‡ | -0.04 (-0.15 – 0.09)   |  |
|                                  | 5th             | 93.2 (80.9 – 107.1)                                        | 109.7 (96.5 – 125.0)  | 52.0 (38.3 – 71.0)   | 41.2 (20.6 – 58.2)§        | 44.2% (23.2 – 59.0)§         | 0.65 (0.58 – 0.73)‡                                      | 0.66 (0.60 – 0.73)‡ | 0.65 (0.55 – 0.77)‡ | 0.00 (-0.11 – 0.12)    |  |

Continued on next page

‡: Ratio is significantly different from one.

§: Change/decline is significantly different from zero.

Absolute decline: wealth quintile-specific U5MR (1990) - wealth quintile-specific U5MR (2016).

Percentage decline: absolute decline over wealth quintile-specific U5MR (1990) × 100.

Change in ratio: ratio (2016) - ratio (1990).

Table 8 – continued from previous page

|                                  | Wealth Quintile | wealth quintile-specific U5MR (deaths per 1000 livebirths) |                       |                       |                            |                              | Ratio of wealth quintile-specific to national-level U5MR |                     |                     |                      |  |
|----------------------------------|-----------------|------------------------------------------------------------|-----------------------|-----------------------|----------------------------|------------------------------|----------------------------------------------------------|---------------------|---------------------|----------------------|--|
|                                  |                 | 1990                                                       | 2000                  | 2016                  | Absolute decline 1990–2016 | Percentage decline 1990–2016 | 1990                                                     | 2000                | 2016                | Change 1990–2016     |  |
| Central African Republic         | 1st             | 199.3 (174.5 – 227.5)                                      | 204.4 (177.5 – 234.2) | 154.3 (97.6 – 242.2)  | 44.9 (-45.5 – 107.5)       | 22.5% (-24.2 – 51.8)         | 1.15 (1.05 – 1.25)‡                                      | 1.19 (1.09 – 1.29)‡ | 1.25 (1.10 – 1.40)‡ | 0.10 (-0.06 – 0.27)  |  |
|                                  | 2nd             | 202.0 (178.5 – 229.6)                                      | 198.3 (173.2 – 226.0) | 139.3 (89.0 – 218.4)  | 62.7 (-18.9 – 120.4)       | 31.1% (-9.9 – 56.8)          | 1.16 (1.08 – 1.24)‡                                      | 1.15 (1.07 – 1.24)‡ | 1.13 (1.02 – 1.23)‡ | -0.04 (-0.16 – 0.09) |  |
|                                  | 3rd             | 186.4 (165.6 – 209.7)                                      | 183.2 (161.5 – 206.6) | 130.4 (83.8 – 203.0)  | 55.9 (-19.3 – 108.1)       | 30.0% (-11.0 – 55.7)         | 1.07 (1.01 – 1.13)‡                                      | 1.06 (1.01 – 1.12)‡ | 1.06 (0.99 – 1.12)  | -0.02 (-0.09 – 0.05) |  |
|                                  | 4th             | 163.1 (142.5 – 186.7)                                      | 159.1 (137.4 – 183.1) | 111.0 (70.4 – 175.1)  | 52.0 (-15.1 – 98.7)        | 31.9% (-9.5 – 57.4)          | 0.94 (0.86 – 1.02)                                       | 0.92 (0.84 – 1.00)  | 0.90 (0.80 – 1.00)  | -0.04 (-0.15 – 0.08) |  |
|                                  | 5th             | 118.3 (101.1 – 137.7)                                      | 116.5 (99.4 – 135.9)  | 82.9 (52.1 – 132.4)   | 35.4 (-16.5 – 71.2)        | 29.9% (-14.7 – 56.8)         | 0.68 (0.61 – 0.76)‡                                      | 0.68 (0.60 – 0.76)‡ | 0.67 (0.57 – 0.79)‡ | -0.01 (-0.12 – 0.10) |  |
| Chad                             | 1st             | 178.1 (156.7 – 201.0)                                      | 158.7 (142.2 – 176.7) | 126.2 (101.3 – 155.5) | 51.9 (17.7 – 84.0)§        | 29.1% (10.6 – 44.0)§         | 0.84 (0.76 – 0.93)‡                                      | 0.86 (0.79 – 0.93)‡ | 0.99 (0.88 – 1.12)  | 0.15 (0.02 – 0.29)§  |  |
|                                  | 2nd             | 241.6 (217.6 – 266.3)                                      | 206.1 (187.1 – 227.6) | 141.3 (114.8 – 169.5) | 100.3 (65.4 – 136.0)§      | 41.5% (28.4 – 53.3)§         | 1.15 (1.06 – 1.23)‡                                      | 1.11 (1.04 – 1.19)‡ | 1.11 (1.02 – 1.20)‡ | -0.04 (-0.16 – 0.09) |  |
|                                  | 3rd             | 225.2 (205.7 – 246.1)                                      | 197.2 (180.8 – 215.8) | 133.6 (110.1 – 159.1) | 91.6 (61.4 – 120.4)§       | 40.7% (28.4 – 51.3)§         | 1.07 (1.01 – 1.12)‡                                      | 1.07 (1.01 – 1.12)‡ | 1.05 (0.99 – 1.11)  | -0.02 (-0.09 – 0.05) |  |
|                                  | 4th             | 216.0 (192.7 – 241.0)                                      | 191.9 (172.8 – 213.2) | 119.6 (96.5 – 144.8)  | 96.4 (64.5 – 128.5)§       | 44.6% (31.8 – 56.0)§         | 1.02 (0.94 – 1.11)                                       | 1.04 (0.96 – 1.12)  | 0.94 (0.85 – 1.04)  | -0.09 (-0.21 – 0.04) |  |
|                                  | 5th             | 193.1 (171.0 – 217.7)                                      | 171.5 (153.9 – 191.2) | 115.8 (92.3 – 141.0)  | 77.3 (45.6 – 108.9)§       | 40.0% (25.1 – 52.8)§         | 0.92 (0.83 – 1.00)                                       | 0.93 (0.85 – 1.00)  | 0.91 (0.81 – 1.02)  | -0.01 (-0.14 – 0.12) |  |
| Colombia                         | 1st             | 47.3 (41.3 – 53.6)                                         | 34.4 (30.3 – 38.9)    | 21.5 (16.1 – 28.4)    | 25.7 (17.1 – 33.4)§        | 54.5% (38.9 – 66.3)§         | 1.35 (1.20 – 1.49)‡                                      | 1.38 (1.24 – 1.52)‡ | 1.41 (1.22 – 1.60)‡ | 0.06 (-0.15 – 0.28)  |  |
|                                  | 2nd             | 40.1 (35.5 – 45.0)                                         | 28.4 (25.1 – 31.9)    | 17.6 (13.2 – 22.9)    | 22.5 (16.0 – 28.5)§        | 56.2% (42.3 – 67.1)§         | 1.14 (1.03 – 1.25)‡                                      | 1.14 (1.03 – 1.24)‡ | 1.15 (1.02 – 1.28)‡ | 0.01 (-0.15 – 0.17)  |  |
|                                  | 3rd             | 35.0 (31.6 – 38.6)                                         | 24.8 (22.3 – 27.5)    | 15.1 (11.6 – 19.4)    | 19.9 (14.8 – 24.4)§        | 56.9% (44.2 – 66.9)§         | 1.00 (0.93 – 1.07)                                       | 0.99 (0.92 – 1.06)  | 0.99 (0.90 – 1.07)  | -0.01 (-0.10 – 0.08) |  |
|                                  | 4th             | 28.9 (25.2 – 33.0)                                         | 19.9 (17.2 – 22.8)    | 11.8 (8.7 – 15.7)     | 17.1 (12.1 – 21.9)§        | 59.3% (45.0 – 70.2)§         | 0.82 (0.73 – 0.92)‡                                      | 0.80 (0.70 – 0.90)‡ | 0.77 (0.64 – 0.90)‡ | -0.05 (-0.20 – 0.09) |  |
|                                  | 5th             | 24.3 (20.2 – 29.1)                                         | 17.5 (14.6 – 20.7)    | 10.6 (7.6 – 14.4)     | 13.7 (8.9 – 18.6)§         | 56.5% (40.6 – 68.2)§         | 0.69 (0.58 – 0.82)‡                                      | 0.70 (0.59 – 0.82)‡ | 0.69 (0.57 – 0.83)‡ | 0.00 (-0.13 – 0.13)  |  |
| Comoros                          | 1st             | 148.8 (123.5 – 177.0)                                      | 124.8 (95.9 – 153.3)  | 90.1 (46.9 – 181.5)   | 58.7 (-34.8 – 107.6)       | 39.5% (-24.2 – 68.4)         | 1.18 (1.03 – 1.35)‡                                      | 1.21 (1.05 – 1.38)‡ | 1.23 (1.05 – 1.41)‡ | 0.05 (-0.13 – 0.23)  |  |
|                                  | 2nd             | 141.4 (120.2 – 162.6)                                      | 115.2 (90.0 – 138.5)  | 82.9 (43.5 – 163.0)   | 58.5 (-25.9 – 102.0)       | 41.4% (-19.8 – 69.3)         | 1.12 (1.01 – 1.23)‡                                      | 1.12 (1.01 – 1.23)‡ | 1.13 (1.01 – 1.25)‡ | 0.01 (-0.13 – 0.15)  |  |
|                                  | 3rd             | 133.3 (115.6 – 150.9)                                      | 108.4 (85.5 – 128.4)  | 75.6 (40.2 – 148.4)   | 57.7 (-19.3 – 96.0)        | 43.3% (-15.1 – 69.9)         | 1.06 (0.99 – 1.13)                                       | 1.05 (0.98 – 1.12)  | 1.03 (0.95 – 1.11)  | -0.03 (-0.10 – 0.04) |  |
|                                  | 4th             | 113.8 (95.8 – 132.7)                                       | 89.9 (69.8 – 109.2)   | 63.6 (33.3 – 125.4)   | 50.2 (-15.8 – 84.8)        | 44.1% (-14.6 – 70.9)         | 0.90 (0.80 – 1.01)                                       | 0.87 (0.77 – 0.98)‡ | 0.87 (0.76 – 0.98)‡ | -0.04 (-0.16 – 0.09) |  |
|                                  | 5th             | 91.8 (73.4 – 112.6)                                        | 76.2 (57.1 – 97.2)    | 54.3 (27.8 – 110.1)   | 37.4 (-20.3 – 68.1)        | 40.8% (-22.9 – 69.5)         | 0.73 (0.60 – 0.87)‡                                      | 0.74 (0.61 – 0.89)‡ | 0.74 (0.60 – 0.90)‡ | 0.01 (-0.11 – 0.14)  |  |
| Congo                            | 1st             | 102.5 (84.8 – 122.5)                                       | 127.0 (109.3 – 147.1) | 63.2 (43.6 – 87.8)    | 39.4 (10.1 – 65.5)§        | 38.4% (10.7 – 58.5)§         | 1.13 (0.99 – 1.28)                                       | 1.08 (0.97 – 1.20)  | 1.17 (1.02 – 1.32)‡ | 0.04 (-0.13 – 0.22)  |  |
|                                  | 2nd             | 104.6 (88.4 – 122.4)                                       | 134.5 (117.2 – 153.3) | 64.0 (44.6 – 88.6)    | 40.6 (12.1 – 66.7)§        | 38.8% (12.5 – 58.3)§         | 1.15 (1.04 – 1.27)‡                                      | 1.15 (1.05 – 1.25)‡ | 1.18 (1.07 – 1.30)‡ | 0.03 (-0.11 – 0.17)  |  |
|                                  | 3rd             | 96.7 (83.5 – 111.6)                                        | 126.3 (111.8 – 142.4) | 56.1 (39.7 – 77.2)    | 40.7 (16.0 – 62.2)§        | 42.0% (17.7 – 59.8)§         | 1.07 (0.99 – 1.13)                                       | 1.08 (1.01 – 1.14)‡ | 1.04 (0.96 – 1.11)  | -0.03 (-0.11 – 0.05) |  |
|                                  | 4th             | 82.0 (68.9 – 96.7)                                         | 109.0 (94.1 – 125.9)  | 47.3 (32.8 – 65.7)    | 34.7 (12.1 – 55.1)§        | 42.3% (16.3 – 61.4)§         | 0.90 (0.80 – 1.01)                                       | 0.93 (0.84 – 1.02)  | 0.87 (0.78 – 0.98)‡ | -0.03 (-0.16 – 0.10) |  |
|                                  | 5th             | 68.1 (53.8 – 85.5)                                         | 89.7 (74.0 – 108.4)   | 40.0 (27.5 – 57.2)    | 28.2 (8.1 – 47.3)§         | 41.3% (13.4 – 60.9)§         | 0.75 (0.62 – 0.90)‡                                      | 0.76 (0.65 – 0.90)‡ | 0.74 (0.61 – 0.89)‡ | -0.01 (-0.15 – 0.12) |  |
| Cote d'Ivoire                    | 1st             | 181.9 (162.3 – 203.3)                                      | 173.4 (152.5 – 196.0) | 113.8 (83.0 – 153.9)  | 68.1 (26.5 – 103.1)§       | 37.5% (14.9 – 54.8)§         | 1.21 (1.10 – 1.32)‡                                      | 1.19 (1.08 – 1.31)‡ | 1.24 (1.09 – 1.39)‡ | 0.03 (-0.13 – 0.20)  |  |
|                                  | 2nd             | 172.3 (155.2 – 190.8)                                      | 167.3 (148.9 – 187.1) | 104.4 (76.3 – 141.2)  | 67.9 (29.3 – 100.3)§       | 39.4% (17.5 – 56.0)§         | 1.14 (1.06 – 1.23)‡                                      | 1.15 (1.06 – 1.24)‡ | 1.14 (1.03 – 1.25)‡ | 0.00 (-0.14 – 0.12)  |  |
|                                  | 3rd             | 155.7 (142.0 – 169.6)                                      | 151.0 (136.1 – 166.1) | 95.2 (70.5 – 126.7)   | 60.5 (27.6 – 87.3)§        | 38.9% (18.2 – 54.8)§         | 1.03 (0.97 – 1.09)                                       | 1.04 (0.97 – 1.09)  | 1.04 (0.97 – 1.10)  | 0.01 (-0.07 – 0.07)  |  |
|                                  | 4th             | 143.6 (128.5 – 159.6)                                      | 138.0 (121.8 – 155.3) | 81.8 (59.8 – 110.8)   | 61.7 (30.7 – 87.8)§        | 43.0% (21.8 – 58.8)§         | 0.95 (0.87 – 1.03)                                       | 0.95 (0.86 – 1.03)  | 0.89 (0.80 – 0.99)‡ | -0.06 (-0.18 – 0.06) |  |
|                                  | 5th             | 101.0 (88.0 – 115.0)                                       | 98.9 (85.9 – 114.4)   | 63.8 (45.8 – 88.4)    | 37.2 (11.3 – 57.9)§        | 36.8% (11.7 – 54.7)§         | 0.67 (0.60 – 0.75)‡                                      | 0.68 (0.60 – 0.76)‡ | 0.69 (0.59 – 0.82)‡ | 0.03 (-0.08 – 0.15)  |  |
| Democratic Republic of the Congo | 1st             | 215.3 (185.1 – 249.4)                                      | 190.4 (167.1 – 217.0) | 117.7 (82.2 – 164.7)  | 97.6 (44.8 – 144.8)§       | 45.3% (22.1 – 62.6)§         | 1.17 (1.05 – 1.31)‡                                      | 1.19 (1.09 – 1.30)‡ | 1.25 (1.10 – 1.40)‡ | 0.08 (-0.10 – 0.25)  |  |
|                                  | 2nd             | 209.9 (183.3 – 239.0)                                      | 182.7 (161.2 – 206.0) | 108.7 (76.0 – 150.9)  | 101.2 (53.4 – 142.5)§      | 48.2% (26.8 – 64.1)§         | 1.14 (1.04 – 1.24)‡                                      | 1.14 (1.06 – 1.23)‡ | 1.15 (1.04 – 1.26)‡ | 0.01 (-0.13 – 0.15)  |  |
|                                  | 3rd             | 196.3 (174.6 – 220.0)                                      | 170.8 (152.7 – 191.1) | 100.5 (70.7 – 139.0)  | 95.8 (54.1 – 132.0)§       | 48.8% (28.3 – 64.1)§         | 1.07 (1.01 – 1.13)‡                                      | 1.07 (1.01 – 1.13)‡ | 1.07 (1.00 – 1.13)  | 0.00 (-0.08 – 0.07)  |  |
|                                  | 4th             | 185.5 (161.2 – 212.8)                                      | 158.6 (138.9 – 181.0) | 85.9 (60.2 – 120.7)   | 99.5 (58.8 – 135.8)§       | 53.7% (33.9 – 68.0)§         | 1.01 (0.91 – 1.11)                                       | 0.99 (0.91 – 1.08)  | 0.91 (0.82 – 1.02)  | -0.10 (-0.23 – 0.03) |  |
|                                  | 5th             | 111.0 (92.4 – 133.2)                                       | 96.4 (81.9 – 113.0)   | 58.7 (40.0 – 84.2)    | 52.3 (22.5 – 78.5)§        | 47.1% (22.5 – 64.2)§         | 0.60 (0.52 – 0.70)‡                                      | 0.60 (0.53 – 0.68)‡ | 0.62 (0.53 – 0.73)‡ | 0.02 (-0.09 – 0.13)  |  |
| Dominican Republic               | 1st             | 77.8 (68.1 – 88.3)                                         | 54.7 (48.1 – 61.7)    | 40.0 (29.4 – 54.0)    | 37.7 (21.7 – 52.1)§        | 48.5% (29.5 – 62.6)§         | 1.30 (1.15 – 1.45)‡                                      | 1.33 (1.21 – 1.47)‡ | 1.30 (1.14 – 1.47)‡ | 0.01 (-0.18 – 0.20)  |  |
|                                  | 2nd             | 70.0 (62.4 – 78.2)                                         | 47.4 (42.0 – 53.2)    | 35.8 (26.8 – 47.9)    | 34.2 (20.7 – 45.9)§        | 48.9% (30.9 – 62.4)§         | 1.17 (1.06 – 1.28)‡                                      | 1.16 (1.05 – 1.26)‡ | 1.17 (1.05 – 1.29)‡ | 0.00 (-0.15 – 0.15)  |  |
|                                  | 3rd             | 61.5 (56.2 – 67.2)                                         | 41.6 (37.4 – 45.8)    | 31.1 (23.4 – 41.4)    | 30.4 (19.8 – 39.6)§        | 49.5% (32.9 – 62.2)§         | 1.03 (0.96 – 1.10)                                       | 1.01 (0.94 – 1.08)  | 1.01 (0.94 – 1.09)  | -0.01 (-0.09 – 0.06) |  |
|                                  | 4th             | 52.2 (45.7 – 59.5)                                         | 35.2 (30.6 – 40.1)    | 26.5 (19.5 – 36.0)    | 25.7 (14.7 – 35.3)§        | 49.3% (30.2 – 63.0)§         | 0.87 (0.77 – 0.98)‡                                      | 0.86 (0.77 – 0.96)‡ | 0.86 (0.76 – 0.98)‡ | -0.01 (-0.14 – 0.12) |  |
|                                  | 5th             | 38.0 (31.0 – 46.4)                                         | 26.2 (21.4 – 31.4)    | 20.1 (14.3 – 27.8)    | 17.9 (9.1 – 26.4)§         | 47.0% (26.3 – 62.0)§         | 0.63 (0.52 – 0.76)‡                                      | 0.64 (0.53 – 0.76)‡ | 0.65 (0.53 – 0.79)‡ | 0.02 (-0.10 – 0.14)  |  |
| Egypt                            | 1st             | 123.1 (112.1 – 134.7)                                      | 68.7 (62.4 – 75.3)    | 33.1 (25.3 – 43.5)    | 90.1 (75.3 – 103.6)§       | 73.1% (64.2 – 79.7)§         | 1.43 (1.32 – 1.55)‡                                      | 1.47 (1.36 – 1.57)‡ | 1.45 (1.28 – 1.62)‡ | 0.02 (-0.18 – 0.21)  |  |
|                                  | 2nd             | 98.4 (89.6 – 107.5)                                        | 52.9 (47.8 – 58.2)    | 26.0 (19.8 – 34.3)    | 72.4 (60.4 – 83.5)§        | 73.6% (64.6 – 80.1)§         | 1.15 (1.06 – 1.23)‡                                      | 1.13 (1.04 – 1.21)‡ | 1.14 (1.03 – 1.26)‡ | -0.01 (-0.15 – 0.14) |  |
|                                  | 3rd             | 88.5 (82.0 – 95.0)                                         | 46.9 (43.1 – 51.0)    | 22.8 (17.7 – 29.7)    | 65.7 (56.6 – 73.6)§        | 74.2% (66.1 – 80.0)§         | 1.03 (0.97 – 1.09)                                       | 1.00 (0.94 – 1.06)  | 1.00 (0.92 – 1.07)  | -0.03 (-0.11 – 0.05) |  |
|                                  | 4th             | 73.7 (66.0 – 81.9)                                         | 41.0 (36.7 – 45.6)    | 19.2 (14.5 – 25.6)    | 54.4 (45.1 – 63.3)§        | 73.9% (65.0 – 80.5)§         | 0.86 (0.78 – 0.94)‡                                      | 0.87 (0.80 – 0.96)‡ | 0.84 (0.73 – 0.96)‡ | -0.01 (-0.14 – 0.12) |  |
|                                  | 5th             | 45.8 (39.3 – 53.3)                                         | 25.0 (21.8 – 28.7)    | 12.9 (9.6 – 17.6)     | 32.9 (25.4 – 40.4)§        | 71.8% (61.2 – 79.3)§         | 0.53 (0.46 – 0.61)‡                                      | 0.53 (0.47 – 0.60)‡ | 0.57 (0.48 – 0.67)‡ | 0.03 (-0.07 – 0.14)  |  |

Continued on next page

‡: Ratio is significantly different from one.

§: Change/decline is significantly different from zero.

Absolute decline: wealth quintile-specific U5MR (1990) - wealth quintile-specific U5MR (2016).

Percentage decline: absolute decline over wealth quintile-specific U5MR (1990) × 100.

Change in ratio: ratio (2016) - ratio (1990).

Table 8 – continued from previous page

|                   | Wealth Quintile | wealth quintile-specific U5MR (deaths per 1000 livebirths) |                       |                      |                            |                              | Ratio of wealth quintile-specific to national-level U5MR |                     |                     |                        |  |
|-------------------|-----------------|------------------------------------------------------------|-----------------------|----------------------|----------------------------|------------------------------|----------------------------------------------------------|---------------------|---------------------|------------------------|--|
|                   |                 | 1990                                                       | 2000                  | 2016                 | Absolute decline 1990–2016 | Percentage decline 1990–2016 | 1990                                                     | 2000                | 2016                | Change 1990–2016       |  |
| El Salvador       | 1st             | 76.5 (62.7 – 91.7)                                         | 43.5 (35.4 – 52.5)    | 21.0 (13.8 – 31.3)   | 55.6 (40.1 – 71.1)§        | 72.6% (58.5 – 82.0)§         | 1.28 (1.07 – 1.50)‡                                      | 1.34 (1.12 – 1.56)‡ | 1.40 (1.16 – 1.65)‡ | 0.11 (-0.11 – 0.35)    |  |
|                   | 2nd             | 69.2 (59.8 – 79.7)                                         | 37.7 (32.1 – 43.9)    | 17.2 (11.6 – 25.5)   | 52.0 (40.0 – 63.4)§        | 75.2% (62.8 – 83.5)§         | 1.16 (1.03 – 1.30)‡                                      | 1.16 (1.03 – 1.30)‡ | 1.15 (0.99 – 1.31)  | -0.02 (-0.18 – 0.15)   |  |
|                   | 3rd             | 60.8 (53.9 – 68.6)                                         | 32.5 (28.2 – 37.1)    | 14.9 (10.1 – 21.9)   | 45.9 (36.3 – 54.6)§        | 75.4% (63.6 – 83.5)§         | 1.02 (0.94 – 1.10)                                       | 1.00 (0.91 – 1.09)  | 1.00 (0.89 – 1.10)  | -0.02 (-0.12 – 0.07)   |  |
|                   | 4th             | 51.1 (43.2 – 59.9)                                         | 27.1 (22.5 – 32.3)    | 11.9 (7.8 – 17.8)    | 39.3 (29.7 – 48.4)§        | 76.8% (64.7 – 85.1)§         | 0.86 (0.74 – 0.98)‡                                      | 0.84 (0.72 – 0.96)‡ | 0.79 (0.65 – 0.94)‡ | -0.07 (-0.23 – 0.09)   |  |
|                   | 5th             | 40.3 (29.5 – 53.4)                                         | 21.8 (15.8 – 29.1)    | 10.1 (6.2 – 16.1)    | 30.2 (20.1 – 41.6)§        | 75.0% (61.1 – 83.8)§         | 0.68 (0.50 – 0.89)‡                                      | 0.67 (0.50 – 0.87)‡ | 0.67 (0.50 – 0.88)‡ | 0.00 (-0.14 – 0.14)    |  |
| Equatorial Guinea | 1st             | 206.6 (169.2 – 252.3)                                      | 169.5 (142.9 – 202.9) | 109.0 (70.5 – 162.7) | 97.6 (33.5 – 157.0)§       | 47.3% (18.3 – 67.1)§         | 1.08 (0.94 – 1.24)                                       | 1.12 (0.98 – 1.26)  | 1.20 (1.03 – 1.38)‡ | 0.12 (-0.06 – 0.29)    |  |
|                   | 2nd             | 199.7 (166.2 – 237.8)                                      | 158.3 (136.1 – 185.2) | 97.7 (64.1 – 143.8)  | 102.0 (45.8 – 152.0)§      | 51.1% (25.0 – 69.3)§         | 1.05 (0.94 – 1.16)                                       | 1.04 (0.94 – 1.15)  | 1.07 (0.95 – 1.19)  | 0.03 (-0.11 – 0.16)    |  |
|                   | 3rd             | 190.9 (161.3 – 225.2)                                      | 151.3 (132.6 – 174.1) | 90.8 (60.2 – 132.4)  | 100.1 (49.1 – 146.7)§      | 52.4% (28.1 – 69.7)§         | 1.00 (0.93 – 1.07)                                       | 1.00 (0.92 – 1.07)  | 1.00 (0.92 – 1.07)  | 0.00 (-0.07 – 0.07)    |  |
|                   | 4th             | 183.4 (150.5 – 221.2)                                      | 141.4 (120.7 – 166.9) | 77.7 (50.7 – 114.0)  | 105.6 (58.6 – 150.7)§      | 57.6% (35.2 – 73.1)§         | 0.96 (0.85 – 1.07)                                       | 0.93 (0.82 – 1.04)  | 0.86 (0.75 – 0.97)‡ | -0.11 (-0.23 – 0.03)   |  |
|                   | 5th             | 172.9 (137.3 – 216.9)                                      | 137.5 (111.8 – 169.2) | 79.3 (50.0 – 122.2)  | 93.6 (44.8 – 141.1)§       | 54.1% (28.8 – 71.6)§         | 0.91 (0.76 – 1.08)                                       | 0.91 (0.76 – 1.07)  | 0.87 (0.70 – 1.07)  | -0.03 (-0.19 – 0.12)   |  |
| Eritrea           | 1st             | 150.8 (125.5 – 178.7)                                      | 93.7 (79.7 – 109.8)   | 52.1 (32.1 – 82.9)   | 98.7 (62.1 – 130.0)§       | 65.5% (44.0 – 78.8)§         | 1.00 (0.86 – 1.15)                                       | 1.05 (0.93 – 1.19)  | 1.17 (0.99 – 1.36)  | 0.17 (0.00 – 0.35)     |  |
|                   | 2nd             | 179.7 (156.9 – 204.4)                                      | 107.3 (93.8 – 121.9)  | 54.9 (34.9 – 86.4)   | 124.9 (86.6 – 155.2)§      | 69.5% (50.8 – 80.9)§         | 1.19 (1.08 – 1.31)‡                                      | 1.21 (1.10 – 1.31)‡ | 1.23 (1.10 – 1.37)‡ | 0.04 (-0.11 – 0.19)    |  |
|                   | 3rd             | 168.9 (150.9 – 188.8)                                      | 99.8 (88.9 – 112.0)   | 47.6 (30.2 – 75.5)   | 121.3 (89.9 – 146.6)§      | 71.8% (55.2 – 82.4)§         | 1.12 (1.05 – 1.19)‡                                      | 1.12 (1.05 – 1.19)‡ | 1.07 (0.99 – 1.15)  | -0.05 (-0.13 – 0.03)   |  |
|                   | 4th             | 157.2 (135.8 – 181.1)                                      | 86.5 (74.9 – 99.9)    | 40.3 (25.1 – 64.1)   | 116.9 (86.0 – 143.8)§      | 74.3% (58.7 – 84.1)§         | 1.04 (0.93 – 1.16)                                       | 0.97 (0.88 – 1.08)  | 0.91 (0.79 – 1.03)  | -0.14 (-0.28 – 0.01)   |  |
|                   | 5th             | 97.9 (76.8 – 123.2)                                        | 57.1 (45.2 – 71.6)    | 27.6 (16.7 – 45.6)   | 70.2 (46.2 – 94.2)§        | 71.8% (53.6 – 82.7)§         | 0.65 (0.52 – 0.80)‡                                      | 0.64 (0.52 – 0.79)‡ | 0.62 (0.49 – 0.78)‡ | -0.03 (-0.15 – 0.09)   |  |
| Ethiopia          | 1st             | 190.5 (164.6 – 218.7)                                      | 140.3 (125.1 – 156.6) | 67.2 (52.0 – 87.4)   | 123.2 (92.2 – 153.6)§      | 64.7% (53.1 – 73.3)§         | 0.94 (0.83 – 1.05)                                       | 0.98 (0.90 – 1.06)  | 1.15 (1.01 – 1.30)‡ | 0.21 (0.04 – 0.39)§    |  |
|                   | 2nd             | 224.0 (198.9 – 249.7)                                      | 155.7 (139.6 – 172.1) | 67.8 (52.9 – 86.4)   | 156.2 (127.0 – 184.4)§     | 69.7% (60.6 – 76.7)§         | 1.10 (1.00 – 1.20)‡                                      | 1.08 (1.00 – 1.16)‡ | 1.16 (1.05 – 1.28)‡ | 0.06 (-0.08 – 0.20)    |  |
|                   | 3rd             | 219.6 (199.9 – 240.6)                                      | 155.4 (141.4 – 169.6) | 60.6 (47.7 – 76.4)   | 159.0 (134.6 – 182.2)§     | 72.4% (64.8 – 78.4)§         | 1.08 (1.02 – 1.14)‡                                      | 1.08 (1.02 – 1.14)‡ | 1.04 (0.97 – 1.11)  | -0.04 (-0.12 – 0.03)   |  |
|                   | 4th             | 220.7 (194.7 – 248.1)                                      | 153.2 (138.1 – 169.9) | 52.8 (40.6 – 68.0)   | 167.9 (139.0 – 196.4)§     | 76.1% (68.5 – 81.8)§         | 1.09 (0.98 – 1.19)                                       | 1.07 (0.99 – 1.15)  | 0.90 (0.80 – 1.01)  | -0.18 (-0.32 – -0.04)§ |  |
|                   | 5th             | 161.3 (138.9 – 186.7)                                      | 113.9 (100.5 – 128.0) | 43.6 (33.1 – 56.9)   | 117.7 (92.7 – 143.7)§      | 73.0% (63.9 – 79.8)§         | 0.79 (0.70 – 0.90)‡                                      | 0.79 (0.72 – 0.87)‡ | 0.75 (0.64 – 0.87)‡ | -0.05 (-0.18 – 0.09)   |  |
| Gabon             | 1st             | 104.3 (85.5 – 126.4)                                       | 95.1 (79.1 – 116.1)   | 57.5 (37.8 – 84.7)   | 46.8 (15.5 – 75.9)§        | 44.9% (16.3 – 64.7)§         | 1.13 (0.98 – 1.28)                                       | 1.12 (0.99 – 1.26)  | 1.21 (1.05 – 1.38)‡ | 0.08 (-0.09 – 0.27)    |  |
|                   | 2nd             | 109.1 (92.0 – 130.2)                                       | 100.6 (85.0 – 121.1)  | 56.7 (38.4 – 82.5)   | 52.4 (22.2 – 80.2)§        | 48.0% (22.1 – 66.3)§         | 1.18 (1.07 – 1.30)‡                                      | 1.19 (1.08 – 1.30)‡ | 1.20 (1.08 – 1.33)‡ | 0.02 (-0.13 – 0.17)    |  |
|                   | 3rd             | 99.1 (84.9 – 116.5)                                        | 90.5 (77.8 – 107.7)   | 49.1 (33.2 – 71.6)   | 50.0 (24.5 – 73.8)§        | 50.5% (26.6 – 67.5)§         | 1.07 (1.00 – 1.14)                                       | 1.07 (1.00 – 1.14)  | 1.04 (0.96 – 1.11)  | -0.04 (-0.12 – 0.04)   |  |
|                   | 4th             | 85.0 (70.6 – 102.9)                                        | 77.8 (65.1 – 95.0)    | 41.2 (27.6 – 60.6)   | 43.8 (20.4 – 65.5)§        | 51.5% (26.3 – 68.8)§         | 0.92 (0.82 – 1.04)                                       | 0.92 (0.82 – 1.03)  | 0.87 (0.76 – 0.98)‡ | -0.05 (-0.19 – 0.08)   |  |
|                   | 5th             | 64.5 (49.3 – 83.4)                                         | 59.1 (46.0 – 76.6)    | 32.5 (20.9 – 49.1)   | 32.0 (12.8 – 51.1)§        | 49.7% (22.4 – 68.0)§         | 0.70 (0.56 – 0.86)‡                                      | 0.70 (0.57 – 0.85)‡ | 0.68 (0.55 – 0.85)‡ | -0.01 (-0.14 – 0.12)   |  |
| Gambia            | 1st             | 183.8 (153.5 – 218.9)                                      | 136.5 (114.1 – 161.4) | 78.9 (48.3 – 126.8)  | 104.9 (51.4 – 148.8)§      | 57.1% (29.5 – 74.2)§         | 1.10 (0.95 – 1.25)                                       | 1.17 (1.03 – 1.31)‡ | 1.21 (1.05 – 1.38)‡ | 0.11 (-0.07 – 0.29)    |  |
|                   | 2nd             | 191.2 (164.5 – 221.0)                                      | 133.1 (113.6 – 154.8) | 77.0 (47.3 – 122.2)  | 114.1 (63.1 – 156.1)§      | 59.7% (35.3 – 75.4)§         | 1.14 (1.03 – 1.25)‡                                      | 1.14 (1.03 – 1.24)‡ | 1.18 (1.06 – 1.30)‡ | 0.04 (-0.11 – 0.19)    |  |
|                   | 3rd             | 180.5 (158.1 – 205.4)                                      | 126.6 (109.9 – 145.8) | 68.9 (42.8 – 108.7)  | 111.6 (68.2 – 146.2)§      | 61.8% (39.1 – 76.4)§         | 1.08 (1.01 – 1.15)‡                                      | 1.08 (1.01 – 1.15)‡ | 1.06 (0.98 – 1.12)  | -0.02 (-0.10 – 0.05)   |  |
|                   | 4th             | 168.8 (144.0 – 198.5)                                      | 110.5 (93.5 – 130.1)  | 59.4 (36.7 – 95.0)   | 109.4 (66.9 – 144.9)§      | 64.8% (42.8 – 78.6)§         | 1.01 (0.90 – 1.13)                                       | 0.94 (0.85 – 1.05)  | 0.91 (0.80 – 1.03)  | -0.10 (-0.23 – 0.04)   |  |
|                   | 5th             | 113.7 (91.7 – 139.8)                                       | 78.8 (64.0 – 96.5)    | 42.2 (25.5 – 68.7)   | 71.5 (41.4 – 99.6)§        | 62.9% (39.7 – 77.6)§         | 0.68 (0.57 – 0.81)‡                                      | 0.67 (0.57 – 0.79)‡ | 0.65 (0.53 – 0.78)‡ | -0.03 (-0.15 – 0.09)   |  |
| Georgia           | 1st             | 60.3 (48.9 – 72.8)                                         | 45.6 (37.0 – 55.7)    | 14.5 (11.5 – 18.2)   | 45.8 (35.0 – 57.6)§        | 76.0% (69.2 – 81.0)§         | 1.28 (1.07 – 1.50)‡                                      | 1.29 (1.08 – 1.50)‡ | 1.36 (1.11 – 1.62)‡ | 0.08 (-0.15 – 0.31)    |  |
|                   | 2nd             | 56.6 (48.3 – 65.9)                                         | 42.9 (36.6 – 50.5)    | 12.6 (10.4 – 15.2)   | 44.0 (35.5 – 53.1)§        | 77.7% (72.0 – 82.2)§         | 1.20 (1.07 – 1.34)‡                                      | 1.21 (1.08 – 1.35)‡ | 1.18 (1.02 – 1.34)‡ | -0.02 (-0.20 – 0.15)   |  |
|                   | 3rd             | 48.4 (42.1 – 55.3)                                         | 36.1 (31.3 – 41.8)    | 10.8 (9.2 – 12.7)    | 37.6 (31.3 – 44.3)§        | 77.6% (72.7 – 81.4)§         | 1.03 (0.94 – 1.11)                                       | 1.02 (0.93 – 1.10)  | 1.01 (0.91 – 1.11)  | -0.01 (-0.11 – 0.08)   |  |
|                   | 4th             | 40.3 (33.5 – 47.7)                                         | 30.0 (24.9 – 36.0)    | 8.6 (6.8 – 10.8)     | 31.7 (24.9 – 38.9)§        | 78.6% (72.2 – 83.5)§         | 0.85 (0.74 – 0.98)‡                                      | 0.85 (0.73 – 0.97)‡ | 0.81 (0.66 – 0.96)‡ | -0.05 (-0.21 – 0.11)   |  |
|                   | 5th             | 30.4 (22.1 – 40.7)                                         | 22.8 (16.6 – 30.8)    | 7.0 (5.0 – 9.5)      | 23.4 (16.2 – 32.2)§        | 77.1% (70.0 – 82.4)§         | 0.64 (0.48 – 0.85)‡                                      | 0.64 (0.48 – 0.85)‡ | 0.65 (0.47 – 0.86)‡ | 0.01 (-0.13 – 0.15)    |  |
| Ghana             | 1st             | 155.8 (140.5 – 172.0)                                      | 125.9 (113.7 – 138.8) | 76.3 (56.8 – 101.1)  | 79.6 (51.9 – 103.8)§       | 51.1% (34.6 – 63.9)§         | 1.23 (1.12 – 1.33)‡                                      | 1.26 (1.16 – 1.36)‡ | 1.30 (1.15 – 1.45)‡ | 0.07 (-0.09 – 0.24)    |  |
|                   | 2nd             | 141.2 (128.2 – 155.1)                                      | 107.2 (97.0 – 117.6)  | 65.0 (48.5 – 86.0)   | 76.2 (52.6 – 97.3)§        | 53.9% (38.6 – 65.8)§         | 1.11 (1.03 – 1.20)‡                                      | 1.07 (0.99 – 1.15)  | 1.11 (1.00 – 1.22)  | -0.01 (-0.14 – 0.12)   |  |
|                   | 3rd             | 131.7 (121.7 – 142.2)                                      | 103.6 (95.2 – 112.5)  | 58.9 (44.3 – 77.3)   | 72.8 (52.8 – 89.5)§        | 55.3% (41.1 – 66.3)§         | 1.04 (0.98 – 1.10)                                       | 1.04 (0.98 – 1.09)  | 1.00 (0.93 – 1.07)  | -0.04 (-0.11 – 0.03)   |  |
|                   | 4th             | 116.8 (105.1 – 129.4)                                      | 90.2 (80.8 – 100.4)   | 50.7 (37.7 – 67.5)   | 66.1 (46.6 – 83.4)§        | 56.6% (41.7 – 68.0)§         | 0.92 (0.84 – 1.01)                                       | 0.90 (0.82 – 0.98)‡ | 0.86 (0.77 – 0.96)‡ | -0.06 (-0.18 – 0.06)   |  |
|                   | 5th             | 89.0 (77.2 – 102.0)                                        | 73.7 (64.6 – 84.4)    | 43.1 (31.5 – 58.5)   | 45.9 (28.4 – 61.6)§        | 51.6% (33.8 – 64.8)§         | 0.70 (0.62 – 0.79)‡                                      | 0.74 (0.66 – 0.83)‡ | 0.73 (0.62 – 0.85)‡ | -0.03 (-0.09 – 0.16)   |  |
| Guatemala         | 1st             | 93.2 (81.6 – 105.2)                                        | 62.3 (54.1 – 71.2)    | 36.1 (28.4 – 45.5)   | 57.1 (43.4 – 69.7)§        | 61.3% (50.3 – 69.7)§         | 1.14 (1.01 – 1.27)‡                                      | 1.20 (1.06 – 1.34)‡ | 1.27 (1.09 – 1.44)‡ | 0.13 (-0.05 – 0.31)    |  |
|                   | 2nd             | 95.8 (85.7 – 105.9)                                        | 62.7 (55.3 – 70.6)    | 34.5 (27.9 – 43.1)   | 61.3 (48.9 – 72.8)§        | 64.0% (54.3 – 71.3)§         | 1.17 (1.07 – 1.27)‡                                      | 1.21 (1.10 – 1.32)‡ | 1.21 (1.09 – 1.34)‡ | 0.04 (-0.10 – 0.19)    |  |
|                   | 3rd             | 87.8 (80.0 – 95.7)                                         | 54.2 (48.6 – 60.2)    | 29.2 (23.7 – 36.0)   | 58.6 (49.2 – 67.4)§        | 66.8% (58.6 – 73.1)§         | 1.07 (1.00 – 1.14)‡                                      | 1.04 (0.97 – 1.12)  | 1.02 (0.95 – 1.10)  | -0.05 (-0.13 – 0.03)   |  |
|                   | 4th             | 75.1 (66.1 – 84.9)                                         | 45.5 (39.3 – 52.2)    | 24.1 (19.0 – 30.5)   | 51.0 (40.8 – 61.1)§        | 67.9% (58.9 – 75.0)§         | 0.92 (0.82 – 1.02)                                       | 0.88 (0.78 – 0.98)‡ | 0.85 (0.74 – 0.96)‡ | -0.07 (-0.20 – 0.05)   |  |
|                   | 5th             | 57.2 (46.5 – 69.3)                                         | 34.8 (28.0 – 42.6)    | 18.7 (13.9 – 24.8)   | 38.5 (28.5 – 49.2)§        | 67.4% (57.1 – 75.1)§         | 0.70 (0.57 – 0.84)‡                                      | 0.67 (0.55 – 0.81)‡ | 0.65 (0.53 – 0.80)‡ | -0.04 (-0.17 – 0.08)   |  |

Continued on next page

‡: Ratio is significantly different from one.

§: Change/decline is significantly different from zero.

Absolute decline: wealth quintile-specific U5MR (1990) - wealth quintile-specific U5MR (2016).

Percentage decline: absolute decline over wealth quintile-specific U5MR (1990) × 100.

Change in ratio: ratio (2016) - ratio (1990).

Table 8 – continued from previous page

|               | Wealth Quintile | wealth quintile-specific U5MR (deaths per 1000 livebirths) |                       |                      |                            |                              | Ratio of wealth quintile-specific to national-level U5MR |                     |                     |                      |  |
|---------------|-----------------|------------------------------------------------------------|-----------------------|----------------------|----------------------------|------------------------------|----------------------------------------------------------|---------------------|---------------------|----------------------|--|
|               |                 | 1990                                                       | 2000                  | 2016                 | Absolute decline 1990–2016 | Percentage decline 1990–2016 | 1990                                                     | 2000                | 2016                | Change 1990–2016     |  |
| Guinea        | 1st             | 272.9 (240.1 – 308.6)                                      | 196.8 (176.8 – 217.6) | 115.0 (90.6 – 146.8) | 157.9 (114.3 – 199.0)§     | 57.8% (45.1 – 67.5)§         | 1.16 (1.04 – 1.29)‡                                      | 1.19 (1.10 – 1.28)‡ | 1.29 (1.15 – 1.44)‡ | 0.13 (-0.05 – 0.31)  |  |
|               | 2nd             | 264.7 (237.5 – 295.6)                                      | 185.9 (168.3 – 204.8) | 100.0 (79.6 – 127.2) | 164.7 (128.5 – 201.0)§     | 62.2% (51.4 – 70.5)§         | 1.13 (1.03 – 1.23)‡                                      | 1.12 (1.04 – 1.20)‡ | 1.12 (1.03 – 1.23)‡ | 0.00 (-0.14 – 0.13)  |  |
|               | 3rd             | 245.9 (225.4 – 268.0)                                      | 172.7 (157.8 – 187.9) | 92.2 (73.9 – 115.8)  | 153.7 (125.0 – 180.7)§     | 62.5% (52.7 – 70.2)§         | 1.05 (0.99 – 1.11)                                       | 1.04 (0.99 – 1.09)  | 1.04 (0.97 – 1.10)  | -0.01 (-0.09 – 0.06) |  |
|               | 4th             | 227.9 (201.6 – 255.0)                                      | 161.5 (145.4 – 178.8) | 79.9 (62.8 – 101.5)  | 148.0 (115.1 – 179.1)§     | 64.9% (54.4 – 72.8)§         | 0.97 (0.87 – 1.07)                                       | 0.97 (0.90 – 1.05)  | 0.90 (0.80 – 1.00)‡ | -0.07 (-0.20 – 0.06) |  |
|               | 5th             | 162.6 (140.4 – 188.9)                                      | 112.1 (99.1 – 127.2)  | 57.9 (44.7 – 75.6)   | 104.7 (78.9 – 132.3)§      | 64.4% (53.0 – 73.0)§         | 0.69 (0.61 – 0.79)‡                                      | 0.68 (0.61 – 0.75)‡ | 0.65 (0.56 – 0.75)‡ | -0.04 (-0.16 – 0.07) |  |
| Guinea-Bissau | 1st             | 241.0 (204.1 – 282.0)                                      | 192.6 (166.3 – 221.2) | 104.8 (70.4 – 147.4) | 136.2 (82.1 – 187.6)§      | 56.5% (37.1 – 71.2)§         | 1.10 (0.97 – 1.23)                                       | 1.11 (1.00 – 1.22)  | 1.19 (1.03 – 1.35)‡ | 0.09 (-0.09 – 0.26)  |  |
|               | 2nd             | 254.3 (220.3 – 292.2)                                      | 204.6 (179.9 – 232.4) | 101.7 (68.6 – 143.3) | 152.6 (99.6 – 202.6)§      | 60.0% (42.3 – 73.3)§         | 1.16 (1.06 – 1.27)‡                                      | 1.17 (1.09 – 1.26)‡ | 1.15 (1.05 – 1.26)‡ | -0.01 (-0.14 – 0.13) |  |
|               | 3rd             | 232.0 (204.5 – 261.7)                                      | 184.1 (163.4 – 207.0) | 92.5 (63.2 – 129.5)  | 139.5 (94.5 – 181.0)§      | 60.1% (43.0 – 73.1)§         | 1.06 (0.99 – 1.12)                                       | 1.06 (1.00 – 1.12)  | 1.05 (0.98 – 1.12)  | -0.01 (-0.08 – 0.07) |  |
|               | 4th             | 213.6 (182.5 – 246.9)                                      | 164.7 (142.9 – 189.0) | 78.5 (53.1 – 111.2)  | 135.1 (91.3 – 176.6)§      | 63.3% (46.8 – 75.3)§         | 0.97 (0.87 – 1.08)                                       | 0.95 (0.86 – 1.03)  | 0.89 (0.79 – 0.99)‡ | -0.08 (-0.21 – 0.05) |  |
|               | 5th             | 155.1 (129.1 – 184.8)                                      | 124.9 (107.1 – 145.5) | 63.1 (42.4 – 91.2)   | 92.1 (57.6 – 126.4)§       | 59.4% (40.4 – 73.0)§         | 0.71 (0.61 – 0.81)‡                                      | 0.72 (0.64 – 0.81)‡ | 0.72 (0.61 – 0.83)‡ | 0.01 (-0.11 – 0.13)  |  |
| Guyana        | 1st             | 68.4 (56.1 – 81.8)                                         | 53.0 (43.8 – 63.0)    | 37.9 (24.6 – 58.4)   | 30.4 (9.2 – 47.6)§         | 44.5% (14.2 – 64.3)§         | 1.14 (0.96 – 1.32)                                       | 1.14 (0.97 – 1.32)  | 1.17 (0.98 – 1.36)  | 0.03 (-0.15 – 0.22)  |  |
|               | 2nd             | 71.0 (61.0 – 81.6)                                         | 55.3 (47.4 – 63.6)    | 38.5 (25.7 – 57.6)   | 32.5 (11.2 – 48.6)§        | 45.8% (16.7 – 64.2)§         | 1.18 (1.05 – 1.31)‡                                      | 1.19 (1.07 – 1.32)‡ | 1.19 (1.05 – 1.32)‡ | 0.01 (-0.14 – 0.16)  |  |
|               | 3rd             | 62.4 (55.0 – 70.6)                                         | 47.9 (41.9 – 54.2)    | 33.1 (22.4 – 49.4)   | 29.3 (11.7 – 42.4)§        | 47.0% (19.8 – 64.7)§         | 1.04 (0.96 – 1.12)                                       | 1.03 (0.95 – 1.11)  | 1.02 (0.94 – 1.11)  | -0.02 (-0.09 – 0.06) |  |
|               | 4th             | 52.8 (44.7 – 62.3)                                         | 40.3 (34.0 – 47.4)    | 27.8 (18.5 – 42.2)   | 25.0 (9.3 – 37.7)§         | 47.3% (18.9 – 65.6)§         | 0.88 (0.77 – 0.99)‡                                      | 0.87 (0.76 – 0.98)‡ | 0.86 (0.74 – 0.98)‡ | -0.02 (-0.15 – 0.12) |  |
|               | 5th             | 45.8 (35.5 – 59.3)                                         | 35.5 (27.3 – 46.0)    | 24.6 (15.6 – 39.4)   | 21.2 (6.7 – 34.3)§         | 46.2% (15.7 – 65.3)§         | 0.76 (0.60 – 0.97)‡                                      | 0.76 (0.60 – 0.97)‡ | 0.76 (0.59 – 0.97)‡ | 0.00 (-0.14 – 0.14)  |  |
| Haiti         | 1st             | 158.0 (140.2 – 177.7)                                      | 120.4 (106.5 – 135.7) | 79.4 (59.8 – 107.4)  | 78.6 (48.6 – 104.5)§       | 49.7% (32.1 – 62.6)§         | 1.09 (0.99 – 1.20)                                       | 1.15 (1.05 – 1.26)‡ | 1.19 (1.04 – 1.33)‡ | 0.09 (-0.07 – 0.26)  |  |
|               | 2nd             | 164.4 (147.7 – 182.4)                                      | 119.4 (106.6 – 132.9) | 77.8 (59.0 – 103.7)  | 86.6 (58.2 – 110.4)§       | 52.7% (36.9 – 64.3)§         | 1.13 (1.04 – 1.23)‡                                      | 1.14 (1.05 – 1.24)‡ | 1.16 (1.05 – 1.28)‡ | 0.03 (-0.11 – 0.16)  |  |
|               | 3rd             | 154.5 (141.5 – 168.3)                                      | 111.1 (100.8 – 122.1) | 69.6 (53.3 – 91.6)   | 84.8 (61.3 – 104.3)§       | 54.9% (40.7 – 65.5)§         | 1.07 (1.01 – 1.13)‡                                      | 1.06 (1.00 – 1.12)‡ | 1.04 (0.97 – 1.10)  | -0.03 (-0.10 – 0.04) |  |
|               | 4th             | 140.5 (124.8 – 157.5)                                      | 95.9 (84.4 – 108.2)   | 60.6 (45.6 – 81.8)   | 79.9 (55.3 – 101.0)§       | 56.9% (41.2 – 67.8)§         | 0.97 (0.87 – 1.07)                                       | 0.92 (0.83 – 1.01)  | 0.90 (0.80 – 1.02)  | -0.06 (-0.19 – 0.07) |  |
|               | 5th             | 107.0 (91.5 – 124.5)                                       | 75.8 (64.6 – 88.0)    | 47.5 (35.3 – 65.0)   | 59.6 (39.3 – 78.4)§        | 55.6% (39.2 – 67.2)§         | 0.74 (0.64 – 0.85)‡                                      | 0.73 (0.63 – 0.83)‡ | 0.71 (0.60 – 0.83)‡ | -0.03 (-0.15 – 0.09) |  |
| Honduras      | 1st             | 79.9 (68.2 – 92.5)                                         | 53.5 (46.6 – 61.3)    | 27.3 (19.6 – 37.5)   | 52.6 (38.4 – 66.2)§        | 65.8% (52.5 – 75.5)§         | 1.37 (1.20 – 1.56)‡                                      | 1.43 (1.28 – 1.60)‡ | 1.46 (1.26 – 1.67)‡ | 0.09 (-0.14 – 0.32)  |  |
|               | 2nd             | 67.0 (58.9 – 76.3)                                         | 42.8 (37.7 – 48.3)    | 21.1 (15.2 – 28.7)   | 45.9 (35.5 – 56.0)§        | 68.5% (56.7 – 77.3)§         | 1.15 (1.03 – 1.27)‡                                      | 1.15 (1.04 – 1.26)‡ | 1.13 (1.00 – 1.27)  | -0.02 (-0.19 – 0.14) |  |
|               | 3rd             | 59.0 (52.9 – 65.4)                                         | 37.2 (33.3 – 41.4)    | 18.6 (13.6 – 25.1)   | 40.4 (32.6 – 47.9)§        | 68.5% (57.5 – 76.8)§         | 1.02 (0.94 – 1.09)                                       | 1.00 (0.92 – 1.07)  | 0.99 (0.90 – 1.08)  | -0.02 (-0.11 – 0.07) |  |
|               | 4th             | 49.1 (42.1 – 56.7)                                         | 30.6 (26.3 – 35.3)    | 15.0 (10.7 – 20.7)   | 34.1 (25.7 – 42.4)§        | 69.5% (57.2 – 78.5)§         | 0.85 (0.74 – 0.96)‡                                      | 0.82 (0.72 – 0.92)‡ | 0.80 (0.68 – 0.93)‡ | -0.04 (-0.19 – 0.11) |  |
|               | 5th             | 35.5 (27.8 – 44.4)                                         | 22.3 (17.8 – 27.7)    | 11.5 (7.8 – 16.5)    | 24.0 (16.6 – 32.2)§        | 67.7% (54.0 – 77.6)§         | 0.61 (0.49 – 0.75)‡                                      | 0.60 (0.49 – 0.73)‡ | 0.61 (0.49 – 0.76)‡ | 0.00 (-0.12 – 0.13)  |  |
| India         | 1st             | 169.7 (160.0 – 179.5)                                      | 125.8 (117.0 – 134.5) | 61.2 (52.2 – 70.7)   | 108.5 (95.0 – 121.9)§      | 63.9% (57.7 – 69.6)§         | 1.35 (1.29 – 1.41)‡                                      | 1.37 (1.29 – 1.46)‡ | 1.42 (1.26 – 1.59)‡ | 0.07 (-0.10 – 0.25)  |  |
|               | 2nd             | 160.3 (150.8 – 170.1)                                      | 114.8 (106.7 – 123.0) | 52.8 (45.7 – 60.4)   | 107.5 (95.1 – 119.5)§      | 67.0% (61.7 – 71.9)§         | 1.27 (1.21 – 1.34)‡                                      | 1.25 (1.18 – 1.33)‡ | 1.23 (1.11 – 1.35)‡ | -0.04 (-0.18 – 0.09) |  |
|               | 3rd             | 132.8 (125.7 – 140.3)                                      | 96.6 (90.7 – 102.7)   | 44.0 (38.7 – 49.2)   | 88.8 (80.4 – 97.4)§        | 66.9% (62.5 – 71.0)§         | 1.05 (1.01 – 1.10)‡                                      | 1.06 (1.00 – 1.11)‡ | 1.02 (0.95 – 1.09)  | -0.03 (-0.11 – 0.04) |  |
|               | 4th             | 105.1 (98.4 – 112.2)                                       | 74.0 (68.4 – 80.2)    | 35.0 (29.7 – 40.7)   | 70.1 (61.3 – 78.9)§        | 66.7% (60.6 – 72.1)§         | 0.83 (0.79 – 0.88)‡                                      | 0.81 (0.75 – 0.87)‡ | 0.81 (0.71 – 0.92)‡ | -0.02 (-0.13 – 0.09) |  |
|               | 5th             | 61.6 (57.2 – 66.3)                                         | 46.3 (42.3 – 50.7)    | 22.0 (18.2 – 26.9)   | 39.6 (33.4 – 45.6)§        | 64.2% (56.2 – 70.9)§         | 0.49 (0.46 – 0.52)‡                                      | 0.51 (0.47 – 0.55)‡ | 0.51 (0.44 – 0.61)‡ | 0.02 (-0.06 – 0.12)  |  |
| Indonesia     | 1st             | 119.2 (106.5 – 133.6)                                      | 77.1 (69.7 – 85.5)    | 39.3 (30.3 – 50.9)   | 79.9 (64.2 – 96.0)§        | 67.0% (57.0 – 74.8)§         | 1.41 (1.28 – 1.57)‡                                      | 1.47 (1.35 – 1.61)‡ | 1.49 (1.32 – 1.67)‡ | 0.08 (-0.12 – 0.27)  |  |
|               | 2nd             | 94.4 (84.8 – 103.9)                                        | 59.7 (53.6 – 65.7)    | 29.8 (23.0 – 38.2)   | 64.6 (52.8 – 75.5)§        | 68.4% (59.0 – 75.8)§         | 1.12 (1.02 – 1.22)‡                                      | 1.14 (1.04 – 1.24)‡ | 1.13 (1.01 – 1.25)‡ | 0.01 (-0.13 – 0.16)  |  |
|               | 3rd             | 87.2 (80.6 – 94.1)                                         | 52.7 (48.3 – 57.1)    | 26.2 (20.5 – 33.4)   | 61.0 (51.6 – 69.3)§        | 69.9% (61.6 – 76.5)§         | 1.03 (0.97 – 1.10)                                       | 1.01 (0.94 – 1.07)  | 0.99 (0.92 – 1.07)  | -0.04 (-0.12 – 0.04) |  |
|               | 4th             | 73.4 (64.8 – 82.3)                                         | 43.6 (38.6 – 49.0)    | 21.8 (16.6 – 28.3)   | 51.6 (41.5 – 61.4)§        | 70.3% (61.0 – 77.6)§         | 0.87 (0.78 – 0.97)‡                                      | 0.83 (0.75 – 0.92)‡ | 0.82 (0.72 – 0.94)‡ | -0.05 (-0.18 – 0.08) |  |
|               | 5th             | 47.2 (39.3 – 56.5)                                         | 28.3 (23.8 – 33.5)    | 14.8 (11.0 – 19.9)   | 32.4 (24.5 – 41.3)§        | 68.6% (57.8 – 76.8)§         | 0.56 (0.47 – 0.67)‡                                      | 0.54 (0.46 – 0.64)‡ | 0.56 (0.46 – 0.67)‡ | 0.00 (-0.11 – 0.11)  |  |
| Iraq          | 1st             | 63.0 (52.5 – 74.1)                                         | 52.2 (44.4 – 61.1)    | 36.8 (26.5 – 51.0)   | 26.3 (10.1 – 40.2)§        | 41.7% (17.6 – 58.2)§         | 1.16 (1.00 – 1.34)                                       | 1.16 (1.01 – 1.32)‡ | 1.18 (1.03 – 1.34)‡ | 0.02 (-0.17 – 0.20)  |  |
|               | 2nd             | 61.3 (53.1 – 70.0)                                         | 50.6 (43.9 – 57.7)    | 34.8 (25.4 – 47.9)   | 26.5 (12.2 – 38.4)§        | 43.2% (21.0 – 59.0)§         | 1.13 (1.01 – 1.25)‡                                      | 1.13 (1.01 – 1.24)‡ | 1.12 (1.00 – 1.24)‡ | -0.02 (-0.16 – 0.12) |  |
|               | 3rd             | 54.0 (47.7 – 60.4)                                         | 44.5 (39.3 – 49.8)    | 30.6 (22.3 – 41.7)   | 23.4 (11.6 – 32.6)§        | 43.3% (22.2 – 58.2)§         | 1.00 (0.92 – 1.07)                                       | 0.99 (0.91 – 1.06)  | 0.98 (0.91 – 1.05)  | -0.01 (-0.09 – 0.06) |  |
|               | 4th             | 46.3 (39.5 – 54.1)                                         | 38.5 (32.8 – 44.7)    | 26.5 (19.0 – 36.7)   | 19.8 (8.2 – 29.5)§         | 42.7% (19.1 – 58.9)§         | 0.85 (0.75 – 0.97)‡                                      | 0.86 (0.75 – 0.96)‡ | 0.85 (0.75 – 0.97)‡ | 0.00 (-0.13 – 0.13)  |  |
|               | 5th             | 46.3 (37.0 – 57.4)                                         | 39.2 (31.8 – 47.7)    | 27.2 (19.1 – 38.4)   | 19.1 (6.7 – 30.5)§         | 41.2% (15.8 – 58.2)§         | 0.85 (0.70 – 1.04)                                       | 0.87 (0.72 – 1.04)  | 0.87 (0.72 – 1.04)  | 0.02 (-0.14 – 0.18)  |  |
| Jordan        | 1st             | 45.2 (39.4 – 51.6)                                         | 34.8 (30.0 – 40.1)    | 23.0 (15.7 – 32.8)   | 22.2 (11.4 – 31.2)§        | 49.1% (26.5 – 65.4)§         | 1.24 (1.10 – 1.39)‡                                      | 1.25 (1.10 – 1.40)‡ | 1.31 (1.11 – 1.51)‡ | 0.07 (-0.13 – 0.28)  |  |
|               | 2nd             | 41.3 (36.6 – 46.3)                                         | 31.5 (27.5 – 35.7)    | 20.0 (14.1 – 28.2)   | 21.3 (12.1 – 28.9)§        | 51.7% (30.9 – 66.3)§         | 1.13 (1.02 – 1.24)‡                                      | 1.13 (1.01 – 1.24)‡ | 1.14 (1.00 – 1.28)  | 0.00 (-0.15 – 0.16)  |  |
|               | 3rd             | 36.7 (33.3 – 40.6)                                         | 28.0 (25.0 – 31.1)    | 17.6 (12.5 – 24.5)   | 19.2 (11.8 – 25.3)§        | 52.2% (33.1 – 66.3)§         | 1.01 (0.94 – 1.08)                                       | 1.00 (0.93 – 1.08)  | 1.00 (0.91 – 1.08)  | -0.01 (-0.09 – 0.07) |  |
|               | 4th             | 32.3 (28.3 – 36.8)                                         | 24.4 (21.0 – 28.2)    | 14.5 (9.9 – 20.8)    | 17.8 (10.6 – 24.0)§        | 55.0% (34.7 – 69.7)§         | 0.89 (0.79 – 0.99)‡                                      | 0.88 (0.77 – 0.99)‡ | 0.83 (0.69 – 0.96)‡ | -0.06 (-0.22 – 0.09) |  |
|               | 5th             | 26.9 (22.5 – 32.1)                                         | 20.8 (17.2 – 25.0)    | 13.0 (8.8 – 18.8)    | 14.0 (7.7 – 19.8)§         | 51.9% (30.3 – 67.2)§         | 0.74 (0.62 – 0.87)‡                                      | 0.75 (0.63 – 0.88)‡ | 0.74 (0.59 – 0.90)‡ | 0.00 (-0.14 – 0.14)  |  |

Continued on next page

‡: Ratio is significantly different from one.

§: Change/decline is significantly different from zero.

Absolute decline: wealth quintile-specific U5MR (1990) - wealth quintile-specific U5MR (2016).

Percentage decline: absolute decline over wealth quintile-specific U5MR (1990) × 100.

Change in ratio: ratio (2016) - ratio (1990).

Table 8 – continued from previous page

|                                  | Wealth Quintile | wealth quintile-specific U5MR (deaths per 1000 livebirths) |                       |                      |                            |                              | Ratio of wealth quintile-specific to national-level U5MR |                     |                     |                        |  |
|----------------------------------|-----------------|------------------------------------------------------------|-----------------------|----------------------|----------------------------|------------------------------|----------------------------------------------------------|---------------------|---------------------|------------------------|--|
|                                  |                 | 1990                                                       | 2000                  | 2016                 | Absolute decline 1990–2016 | Percentage decline 1990–2016 | 1990                                                     | 2000                | 2016                | Change 1990–2016       |  |
| Kazakhstan                       | 1st             | 63.6 (53.4 – 74.6)                                         | 52.9 (44.9 – 61.7)    | 14.9 (12.3 – 17.8)   | 48.7 (39.1 – 59.3)§        | 76.5% (71.5 – 80.8)§         | 1.22 (1.05 – 1.39)‡                                      | 1.23 (1.07 – 1.40)‡ | 1.31 (1.09 – 1.55)‡ | 0.09 (-0.12 – 0.32)    |  |
|                                  | 2nd             | 61.9 (53.5 – 70.8)                                         | 51.2 (44.7 – 58.1)    | 13.3 (11.4 – 15.2)   | 48.7 (40.5 – 57.5)§        | 78.6% (74.5 – 82.2)§         | 1.19 (1.06 – 1.31)‡                                      | 1.19 (1.08 – 1.31)‡ | 1.16 (1.01 – 1.32)‡ | -0.02 (-0.19 – 0.15)   |  |
|                                  | 3rd             | 53.6 (47.6 – 60.2)                                         | 44.0 (39.2 – 49.1)    | 11.5 (10.2 – 12.8)   | 42.1 (36.2 – 48.5)§        | 78.5% (75.5 – 81.3)§         | 1.03 (0.95 – 1.10)                                       | 1.02 (0.95 – 1.10)  | 1.01 (0.91 – 1.11)  | -0.02 (-0.11 – 0.07)   |  |
|                                  | 4th             | 45.1 (38.4 – 52.2)                                         | 36.5 (31.2 – 42.2)    | 9.2 (7.5 – 10.9)     | 35.9 (29.5 – 42.9)§        | 79.6% (74.8 – 83.7)§         | 0.86 (0.76 – 0.97)‡                                      | 0.85 (0.74 – 0.96)‡ | 0.81 (0.66 – 0.95)‡ | -0.06 (-0.22 – 0.10)   |  |
|                                  | 5th             | 36.8 (28.8 – 46.6)                                         | 30.4 (24.1 – 37.8)    | 8.1 (6.2 – 10.3)     | 28.7 (21.7 – 37.6)§        | 78.0% (72.6 – 82.5)§         | 0.70 (0.56 – 0.87)‡                                      | 0.71 (0.57 – 0.87)‡ | 0.71 (0.55 – 0.90)‡ | 0.00 (-0.14 – 0.15)    |  |
| Kenya                            | 1st             | 125.4 (112.6 – 139.3)                                      | 125.5 (112.9 – 139.7) | 60.4 (48.3 – 75.3)   | 65.0 (46.5 – 82.5)§        | 51.8% (39.0 – 61.9)§         | 1.28 (1.17 – 1.40)‡                                      | 1.25 (1.15 – 1.35)‡ | 1.23 (1.10 – 1.37)‡ | -0.05 (-0.22 – 0.11)   |  |
|                                  | 2nd             | 112.1 (101.2 – 123.2)                                      | 112.1 (100.7 – 124.3) | 56.7 (45.7 – 70.0)   | 55.3 (39.2 – 70.2)§        | 49.4% (36.6 – 59.6)§         | 1.14 (1.06 – 1.23)‡                                      | 1.11 (1.03 – 1.20)‡ | 1.15 (1.05 – 1.26)‡ | 0.01 (-0.12 – 0.14)    |  |
|                                  | 3rd             | 99.4 (91.3 – 107.5)                                        | 102.6 (93.7 – 111.8)  | 48.8 (40.0 – 59.7)   | 50.6 (37.6 – 62.0)§        | 50.9% (39.3 – 60.2)§         | 1.01 (0.96 – 1.07)                                       | 1.02 (0.96 – 1.07)  | 0.99 (0.93 – 1.06)  | -0.02 (-0.09 – 0.05)   |  |
|                                  | 4th             | 81.5 (72.2 – 90.8)                                         | 86.4 (77.1 – 96.3)    | 42.9 (34.3 – 53.7)   | 38.5 (24.7 – 50.5)§        | 47.3% (32.5 – 58.6)§         | 0.83 (0.75 – 0.91)‡                                      | 0.86 (0.78 – 0.93)‡ | 0.87 (0.78 – 0.97)‡ | 0.04 (-0.07 – 0.17)    |  |
|                                  | 5th             | 72.1 (63.2 – 81.9)                                         | 77.4 (68.5 – 87.4)    | 37.1 (29.2 – 47.6)   | 35.0 (22.7 – 46.4)§        | 48.6% (33.3 – 60.0)§         | 0.74 (0.66 – 0.82)‡                                      | 0.77 (0.69 – 0.85)‡ | 0.75 (0.65 – 0.87)‡ | 0.02 (-0.10 – 0.14)    |  |
| Kyrgyzstan                       | 1st             | 82.0 (68.0 – 97.0)                                         | 63.3 (52.6 – 73.7)    | 28.2 (23.8 – 33.1)   | 53.7 (40.3 – 68.2)§        | 65.6% (57.7 – 71.7)§         | 1.25 (1.08 – 1.43)‡                                      | 1.28 (1.11 – 1.46)‡ | 1.34 (1.14 – 1.55)‡ | 0.08 (-0.12 – 0.30)    |  |
|                                  | 2nd             | 75.1 (64.2 – 87.2)                                         | 57.6 (49.4 – 65.6)    | 24.2 (21.1 – 27.5)   | 50.9 (40.0 – 62.9)§        | 67.8% (61.2 – 73.1)§         | 1.15 (1.04 – 1.27)‡                                      | 1.17 (1.05 – 1.29)‡ | 1.15 (1.01 – 1.29)‡ | 0.00 (-0.16 – 0.16)    |  |
|                                  | 3rd             | 66.9 (58.1 – 76.3)                                         | 49.8 (43.3 – 55.6)    | 21.1 (19.0 – 23.2)   | 45.8 (37.2 – 55.1)§        | 68.5% (63.2 – 72.8)§         | 1.02 (0.95 – 1.10)                                       | 1.01 (0.93 – 1.08)  | 1.00 (0.91 – 1.08)  | -0.02 (-0.11 – 0.06)   |  |
|                                  | 4th             | 56.3 (47.2 – 66.7)                                         | 41.4 (34.8 – 48.0)    | 17.1 (14.4 – 20.0)   | 39.2 (30.1 – 49.6)§        | 69.6% (62.4 – 75.6)§         | 0.86 (0.75 – 0.98)‡                                      | 0.84 (0.73 – 0.95)‡ | 0.81 (0.69 – 0.94)‡ | -0.05 (-0.19 – 0.09)   |  |
|                                  | 5th             | 46.8 (36.3 – 59.3)                                         | 34.9 (27.4 – 43.6)    | 14.9 (11.7 – 18.7)   | 31.9 (23.1 – 42.9)§        | 68.2% (60.2 – 74.6)§         | 0.72 (0.57 – 0.88)‡                                      | 0.71 (0.57 – 0.87)‡ | 0.70 (0.56 – 0.88)‡ | -0.01 (-0.15 – 0.13)   |  |
| Lao People's Democratic Republic | 1st             | 196.1 (162.2 – 235.0)                                      | 151.2 (125.6 – 181.3) | 87.1 (60.2 – 123.6)  | 109.1 (63.9 – 150.0)§      | 55.6% (36.1 – 69.3)§         | 1.21 (1.03 – 1.41)‡                                      | 1.30 (1.12 – 1.49)‡ | 1.36 (1.17 – 1.56)‡ | 0.15 (-0.05 – 0.34)    |  |
|                                  | 2nd             | 189.2 (163.1 – 217.5)                                      | 136.9 (117.7 – 158.9) | 76.9 (54.0 – 107.5)  | 112.3 (74.7 – 147.7)§      | 59.4% (42.4 – 71.7)§         | 1.17 (1.05 – 1.29)‡                                      | 1.18 (1.05 – 1.30)‡ | 1.20 (1.08 – 1.33)‡ | 0.03 (-0.12 – 0.18)    |  |
|                                  | 3rd             | 176.2 (155.6 – 198.7)                                      | 126.9 (111.6 – 144.4) | 67.6 (48.1 – 94.1)   | 108.6 (77.8 – 136.9)§      | 61.6% (46.2 – 73.0)§         | 1.09 (1.01 – 1.17)‡                                      | 1.09 (1.01 – 1.16)‡ | 1.06 (0.98 – 1.13)  | -0.03 (-0.11 – 0.05)   |  |
|                                  | 4th             | 161.9 (137.3 – 188.8)                                      | 108.3 (91.6 – 127.6)  | 56.5 (39.5 – 80.1)   | 105.4 (74.3 – 135.9)§      | 65.1% (49.8 – 76.1)§         | 1.00 (0.88 – 1.13)                                       | 0.93 (0.82 – 1.05)  | 0.88 (0.78 – 1.00)‡ | -0.12 (-0.25 – 0.02)   |  |
|                                  | 5th             | 84.5 (63.7 – 109.0)                                        | 59.1 (45.4 – 76.1)    | 31.4 (20.5 – 46.9)   | 53.1 (33.2 – 75.0)§        | 62.8% (45.5 – 74.9)§         | 0.52 (0.40 – 0.67)‡                                      | 0.51 (0.40 – 0.63)‡ | 0.49 (0.38 – 0.62)‡ | -0.03 (-0.13 – 0.06)   |  |
| Lesotho                          | 1st             | 102.6 (87.0 – 120.0)                                       | 119.5 (103.7 – 136.3) | 103.4 (77.2 – 138.1) | -0.8 (-36.3 – 28.3)        | -0.8% (-37.6 – 25.8)         | 1.12 (0.99 – 1.27)                                       | 1.08 (0.96 – 1.21)  | 1.11 (0.97 – 1.26)  | -0.02 (-0.18 – 0.14)   |  |
|                                  | 2nd             | 103.0 (89.9 – 117.2)                                       | 123.3 (108.8 – 138.5) | 105.4 (79.3 – 138.3) | -2.4 (-37.2 – 25.7)        | -2.3% (-38.0 – 23.5)         | 1.13 (1.02 – 1.24)‡                                      | 1.12 (1.02 – 1.22)‡ | 1.13 (1.02 – 1.23)‡ | 0.00 (-0.14 – 0.13)    |  |
|                                  | 3rd             | 96.6 (85.7 – 107.7)                                        | 117.5 (105.6 – 129.7) | 98.8 (74.9 – 128.3)  | -2.2 (-33.0 – 22.8)        | -2.3% (-35.4 – 22.6)         | 1.06 (0.99 – 1.13)                                       | 1.06 (1.00 – 1.13)  | 1.06 (0.99 – 1.13)  | 0.00 (-0.07 – 0.07)    |  |
|                                  | 4th             | 83.9 (71.6 – 97.2)                                         | 105.2 (92.1 – 120.0)  | 88.7 (66.7 – 117.6)  | -4.9 (-34.9 – 19.4)        | -5.8% (-44.0 – 21.9)         | 0.92 (0.82 – 1.03)                                       | 0.95 (0.86 – 1.06)  | 0.95 (0.85 – 1.06)  | 0.03 (-0.10 – 0.16)    |  |
|                                  | 5th             | 70.4 (57.9 – 84.7)                                         | 86.1 (73.0 – 101.6)   | 71.1 (52.0 – 96.4)   | -1.0% (-26.3 – 20.1)       | -1.0% (-39.8 – 26.2)         | 0.77 (0.65 – 0.90)‡                                      | 0.78 (0.68 – 0.90)‡ | 0.76 (0.64 – 0.90)‡ | -0.01 (-0.14 – 0.12)   |  |
| Liberia                          | 1st             | 260.1 (219.0 – 307.0)                                      | 186.9 (159.8 – 215.1) | 78.0 (56.4 – 109.8)  | 182.1 (134.7 – 231.5)§     | 70.0% (57.2 – 78.7)§         | 1.01 (0.87 – 1.16)                                       | 1.02 (0.89 – 1.15)  | 1.16 (1.01 – 1.31)‡ | 0.15 (-0.03 – 0.32)    |  |
|                                  | 2nd             | 276.4 (240.5 – 313.9)                                      | 192.9 (170.3 – 216.6) | 73.9 (54.1 – 102.9)  | 202.5 (160.1 – 243.4)§     | 73.3% (62.5 – 80.6)§         | 1.07 (0.96 – 1.18)                                       | 1.05 (0.95 – 1.14)  | 1.10 (0.99 – 1.21)  | 0.02 (-0.11 – 0.16)    |  |
|                                  | 3rd             | 264.6 (236.9 – 294.2)                                      | 188.5 (170.0 – 207.4) | 67.6 (49.9 – 93.5)   | 197.0 (162.6 – 229.1)§     | 74.4% (64.6 – 81.3)§         | 1.03 (0.96 – 1.10)                                       | 1.02 (0.96 – 1.09)  | 1.00 (0.93 – 1.07)  | -0.02 (-0.10 – 0.05)   |  |
|                                  | 4th             | 256.8 (221.0 – 295.8)                                      | 182.9 (160.2 – 207.8) | 58.6 (43.0 – 82.0)   | 198.2 (158.5 – 237.7)§     | 77.2% (67.7 – 83.6)§         | 1.00 (0.88 – 1.11)                                       | 0.99 (0.89 – 1.10)  | 0.87 (0.77 – 0.97)‡ | -0.13 (-0.26 – 0.01)   |  |
|                                  | 5th             | 231.6 (192.8 – 276.9)                                      | 168.3 (144.5 – 195.3) | 58.9 (42.0 – 83.3)   | 172.7 (131.2 – 215.9)§     | 74.6% (63.9 – 81.9)§         | 0.90 (0.76 – 1.06)                                       | 0.92 (0.80 – 1.04)  | 0.87 (0.75 – 1.02)  | -0.02 (-0.18 – 0.13)   |  |
| Madagascar                       | 1st             | 187.0 (164.9 – 210.5)                                      | 135.2 (119.6 – 152.7) | 62.2 (42.2 – 90.8)   | 124.8 (90.1 – 154.1)§      | 66.7% (50.6 – 77.6)§         | 1.17 (1.06 – 1.29)‡                                      | 1.26 (1.15 – 1.37)‡ | 1.34 (1.17 – 1.52)‡ | 0.17 (-0.02 – 0.36)    |  |
|                                  | 2nd             | 185.7 (166.4 – 206.3)                                      | 125.5 (111.6 – 140.1) | 55.3 (37.7 – 79.8)   | 130.3 (99.8 – 156.3)§      | 70.2% (56.7 – 79.7)§         | 1.16 (1.07 – 1.26)‡                                      | 1.17 (1.08 – 1.26)‡ | 1.19 (1.07 – 1.32)‡ | 0.03 (-0.12 – 0.17)    |  |
|                                  | 3rd             | 170.0 (155.4 – 185.4)                                      | 114.5 (103.3 – 126.2) | 47.5 (32.6 – 68.5)   | 122.5 (97.5 – 143.1)§      | 72.0% (59.4 – 80.9)§         | 1.07 (1.01 – 1.13)‡                                      | 1.06 (1.00 – 1.12)‡ | 1.02 (0.95 – 1.10)  | -0.04 (-0.12 – 0.04)   |  |
|                                  | 4th             | 158.3 (141.0 – 177.3)                                      | 98.4 (87.0 – 111.1)   | 39.8 (26.9 – 57.8)   | 118.5 (93.8 – 140.4)§      | 74.9% (62.8 – 83.1)§         | 0.99 (0.90 – 1.09)                                       | 0.91 (0.83 – 1.00)  | 0.86 (0.75 – 0.96)‡ | -0.14 (-0.26 – 0.00)§  |  |
|                                  | 5th             | 96.5 (81.8 – 113.5)                                        | 64.3 (54.4 – 75.7)    | 27.2 (17.8 – 40.7)   | 69.4 (51.5 – 86.8)§        | 71.8% (57.9 – 81.5)§         | 0.61 (0.52 – 0.70)‡                                      | 0.60 (0.52 – 0.69)‡ | 0.59 (0.48 – 0.71)‡ | -0.02 (-0.13 – 0.09)   |  |
| Malawi                           | 1st             | 242.4 (218.5 – 267.4)                                      | 185.3 (170.1 – 201.5) | 65.2 (49.2 – 85.5)   | 177.1 (146.7 – 205.9)§     | 73.1% (64.4 – 79.9)§         | 1.04 (0.96 – 1.13)                                       | 1.06 (0.99 – 1.13)  | 1.18 (1.06 – 1.32)‡ | 0.14 (-0.01 – 0.30)    |  |
|                                  | 2nd             | 254.8 (231.5 – 278.4)                                      | 193.9 (178.0 – 211.0) | 64.1 (49.0 – 83.7)   | 190.7 (160.8 – 218.3)§     | 74.8% (66.8 – 81.0)§         | 1.10 (1.02 – 1.18)‡                                      | 1.11 (1.05 – 1.18)‡ | 1.16 (1.06 – 1.27)‡ | 0.07 (-0.06 – 0.20)    |  |
|                                  | 3rd             | 248.0 (230.2 – 266.4)                                      | 184.6 (171.7 – 198.4) | 56.3 (43.4 – 72.4)   | 191.7 (168.3 – 213.9)§     | 77.3% (70.7 – 82.6)§         | 1.07 (1.02 – 1.12)‡                                      | 1.06 (1.01 – 1.10)‡ | 1.02 (0.96 – 1.08)  | -0.05 (-0.12 – 0.03)   |  |
|                                  | 4th             | 241.7 (218.7 – 265.1)                                      | 177.4 (162.9 – 193.2) | 47.9 (36.0 – 62.9)   | 193.7 (167.3 – 219.2)§     | 80.2% (73.7 – 85.2)§         | 1.04 (0.96 – 1.12)                                       | 1.02 (0.95 – 1.08)  | 0.87 (0.78 – 0.97)‡ | -0.17 (-0.29 – -0.05)§ |  |
|                                  | 5th             | 175.2 (156.3 – 195.8)                                      | 132.2 (120.1 – 145.5) | 41.9 (31.4 – 55.5)   | 133.3 (110.8 – 155.6)§     | 76.1% (67.8 – 82.4)§         | 0.75 (0.68 – 0.83)‡                                      | 0.76 (0.70 – 0.81)‡ | 0.76 (0.67 – 0.86)‡ | 0.01 (-0.11 – 0.12)    |  |
| Maldives                         | 1st             | 113.6 (92.9 – 136.9)                                       | 55.8 (45.5 – 67.2)    | 11.5 (8.4 – 15.3)    | 102.1 (81.6 – 124.6)§      | 89.9% (86.1 – 92.6)§         | 1.21 (1.01 – 1.43)‡                                      | 1.28 (1.07 – 1.50)‡ | 1.35 (1.11 – 1.61)‡ | 0.14 (-0.08 – 0.38)    |  |
|                                  | 2nd             | 107.3 (92.2 – 124.2)                                       | 51.3 (43.7 – 59.5)    | 9.9 (7.4 – 12.9)     | 97.4 (82.1 – 114.0)§       | 90.8% (87.6 – 93.2)§         | 1.14 (1.01 – 1.27)‡                                      | 1.18 (1.04 – 1.32)‡ | 1.16 (1.00 – 1.33)  | 0.02 (-0.15 – 0.20)    |  |
|                                  | 3rd             | 99.1 (87.2 – 111.4)                                        | 44.1 (38.4 – 50.1)    | 8.5 (6.6 – 11.0)     | 90.5 (78.2 – 103.0)§       | 91.4% (88.6 – 93.4)§         | 1.06 (0.97 – 1.13)                                       | 1.01 (0.93 – 1.10)  | 1.00 (0.90 – 1.10)  | -0.05 (-0.14 – 0.05)   |  |
|                                  | 4th             | 84.3 (71.2 – 98.6)                                         | 37.1 (31.1 – 43.8)    | 6.9 (5.0 – 9.2)      | 77.4 (64.3 – 91.9)§        | 91.9% (88.8 – 94.2)§         | 0.90 (0.78 – 1.02)                                       | 0.85 (0.74 – 0.97)‡ | 0.81 (0.66 – 0.96)‡ | -0.09 (-0.25 – 0.07)   |  |
|                                  | 5th             | 65.2 (48.3 – 87.4)                                         | 29.1 (21.6 – 39.0)    | 5.7 (3.9 – 8.2)      | 59.5 (43.3 – 80.6)§        | 91.2% (87.8 – 93.7)§         | 0.69 (0.52 – 0.92)‡                                      | 0.67 (0.50 – 0.88)‡ | 0.67 (0.49 – 0.90)‡ | -0.02 (-0.16 – 0.12)   |  |

Continued on next page

‡: Ratio is significantly different from one.

§: Change/decline is significantly different from zero.

Absolute decline: wealth quintile-specific U5MR (1990) - wealth quintile-specific U5MR (2016).

Percentage decline: absolute decline over wealth quintile-specific U5MR (1990) × 100.

Change in ratio: ratio (2016) - ratio (1990).

Table 8 – continued from previous page

|            | Wealth Quintile | wealth quintile-specific U5MR (deaths per 1000 livebirths) |                       |                      |                            |                              | Ratio of wealth quintile-specific to national-level U5MR |                     |                     |                      |  |
|------------|-----------------|------------------------------------------------------------|-----------------------|----------------------|----------------------------|------------------------------|----------------------------------------------------------|---------------------|---------------------|----------------------|--|
|            |                 | 1990                                                       | 2000                  | 2016                 | Absolute decline 1990–2016 | Percentage decline 1990–2016 | 1990                                                     | 2000                | 2016                | Change 1990–2016     |  |
| Mali       | 1st             | 278.8 (252.0 – 308.2)                                      | 237.3 (214.4 – 261.8) | 132.8 (80.8 – 212.2) | 146.0 (63.9 – 202.8)§      | 52.4% (23.7 – 71.1)§         | 1.10 (1.02 – 1.18)‡                                      | 1.08 (1.01 – 1.14)‡ | 1.20 (1.07 – 1.34)‡ | 0.10 (-0.05 – 0.26)  |  |
|            | 2nd             | 286.2 (261.1 – 313.6)                                      | 253.3 (230.4 – 278.5) | 127.9 (78.6 – 203.5) | 158.3 (82.0 – 212.6)§      | 55.3% (29.1 – 72.6)§         | 1.13 (1.05 – 1.20)‡                                      | 1.15 (1.09 – 1.22)‡ | 1.16 (1.06 – 1.26)‡ | 0.03 (-0.09 – 0.16)  |  |
|            | 3rd             | 272.8 (251.9 – 295.5)                                      | 238.1 (218.4 – 259.8) | 119.7 (73.6 – 189.3) | 153.0 (84.1 – 202.4)§      | 56.1% (30.8 – 72.9)§         | 1.07 (1.03 – 1.12)‡                                      | 1.08 (1.04 – 1.13)‡ | 1.08 (1.02 – 1.14)‡ | 0.01 (-0.06 – 0.08)  |  |
|            | 4th             | 260.9 (237.1 – 286.5)                                      | 230.1 (208.0 – 253.8) | 104.3 (64.0 – 166.3) | 156.7 (92.7 – 201.7)§      | 60.0% (36.2 – 75.4)§         | 1.03 (0.96 – 1.10)                                       | 1.05 (0.98 – 1.11)  | 0.94 (0.85 – 1.05)  | -0.09 (-0.20 – 0.04) |  |
|            | 5th             | 170.8 (152.1 – 191.3)                                      | 140.2 (125.6 – 156.3) | 68.3 (41.5 – 109.8)  | 102.4 (59.6 – 135.4)§      | 60.0% (35.8 – 75.8)§         | 0.67 (0.61 – 0.74)‡                                      | 0.64 (0.59 – 0.69)‡ | 0.62 (0.53 – 0.71)‡ | -0.05 (-0.16 – 0.05) |  |
| Mauritania | 1st             | 146.0 (122.5 – 171.8)                                      | 144.1 (121.2 – 169.6) | 104.3 (56.9 – 190.9) | 41.8 (-45.5 – 94.0)        | 28.6% (-32.4 – 61.3)         | 1.25 (1.09 – 1.43)‡                                      | 1.27 (1.13 – 1.43)‡ | 1.28 (1.12 – 1.45)‡ | 0.03 (-0.16 – 0.21)  |  |
|            | 2nd             | 128.9 (110.4 – 148.6)                                      | 124.6 (107.0 – 144.5) | 91.7 (50.2 – 168.0)  | 37.2 (-39.3 – 81.3)        | 28.8% (-31.9 – 60.9)         | 1.11 (0.99 – 1.22)                                       | 1.10 (1.00 – 1.21)  | 1.13 (1.02 – 1.24)‡ | 0.02 (-0.12 – 0.16)  |  |
|            | 3rd             | 120.4 (105.9 – 135.9)                                      | 116.5 (101.6 – 133.2) | 82.9 (45.6 – 149.9)  | 37.5 (-30.3 – 76.6)        | 31.2% (-25.5 – 62.0)         | 1.03 (0.96 – 1.10)                                       | 1.03 (0.96 – 1.10)  | 1.02 (0.95 – 1.09)  | -0.02 (-0.09 – 0.06) |  |
|            | 4th             | 103.1 (87.3 – 120.0)                                       | 98.7 (83.6 – 116.2)   | 69.4 (37.9 – 126.9)  | 33.7 (-25.2 – 68.8)        | 32.7% (-25.5 – 63.5)         | 0.89 (0.78 – 0.99)‡                                      | 0.87 (0.78 – 0.97)‡ | 0.85 (0.75 – 0.96)‡ | -0.03 (-0.16 – 0.09) |  |
|            | 5th             | 84.0 (66.9 – 103.5)                                        | 81.6 (66.1 – 100.1)   | 58.6 (31.6 – 109.6)  | 25.4 (-25.0 – 56.2)        | 30.2% (-32.2 – 62.6)         | 0.72 (0.59 – 0.87)‡                                      | 0.72 (0.61 – 0.85)‡ | 0.72 (0.60 – 0.86)‡ | 0.00 (-0.13 – 0.13)  |  |
| Mongolia   | 1st             | 138.2 (118.2 – 159.9)                                      | 84.9 (72.9 – 97.9)    | 26.0 (17.1 – 39.0)   | 112.2 (89.0 – 134.7)§      | 81.2% (71.4 – 87.7)§         | 1.27 (1.12 – 1.43)‡                                      | 1.34 (1.19 – 1.49)‡ | 1.45 (1.25 – 1.67)‡ | 0.18 (-0.03 – 0.41)  |  |
|            | 2nd             | 124.7 (109.0 – 141.5)                                      | 75.1 (65.4 – 85.6)    | 20.8 (13.6 – 31.0)   | 103.9 (85.5 – 121.8)§      | 83.3% (74.7 – 89.0)§         | 1.15 (1.04 – 1.26)‡                                      | 1.18 (1.08 – 1.29)‡ | 1.16 (1.02 – 1.31)‡ | 0.01 (-0.15 – 0.18)  |  |
|            | 3rd             | 113.6 (101.2 – 126.4)                                      | 64.6 (56.9 – 72.5)    | 17.7 (11.8 – 26.1)   | 95.8 (81.2 – 109.4)§       | 84.4% (76.7 – 89.7)§         | 1.05 (0.97 – 1.12)                                       | 1.02 (0.95 – 1.09)  | 0.99 (0.90 – 1.08)  | -0.06 (-0.15 – 0.03) |  |
|            | 4th             | 94.1 (80.9 – 108.8)                                        | 52.5 (44.9 – 60.9)    | 13.9 (8.9 – 20.8)    | 80.2 (65.6 – 95.1)§        | 85.3% (77.7 – 90.6)§         | 0.87 (0.77 – 0.97)‡                                      | 0.83 (0.73 – 0.93)‡ | 0.77 (0.65 – 0.90)‡ | -0.09 (-0.24 – 0.05) |  |
|            | 5th             | 71.9 (58.1 – 87.9)                                         | 40.0 (32.2 – 48.8)    | 11.1 (6.9 – 17.1)    | 60.9 (46.7 – 75.8)§        | 84.6% (76.2 – 90.2)§         | 0.66 (0.54 – 0.80)‡                                      | 0.63 (0.52 – 0.75)‡ | 0.62 (0.49 – 0.77)‡ | -0.04 (-0.17 – 0.09) |  |
| Morocco    | 1st             | 106.1 (92.8 – 120.4)                                       | 69.4 (60.0 – 79.5)    | 38.5 (27.0 – 53.7)   | 67.6 (48.6 – 84.8)§        | 63.7% (48.7 – 74.7)§         | 1.33 (1.18 – 1.49)‡                                      | 1.39 (1.25 – 1.54)‡ | 1.42 (1.22 – 1.62)‡ | 0.09 (-0.11 – 0.29)  |  |
|            | 2nd             | 95.3 (84.8 – 106.6)                                        | 61.5 (53.9 – 69.7)    | 32.3 (23.2 – 44.7)   | 62.9 (47.3 – 77.3)§        | 66.1% (52.4 – 75.9)§         | 1.20 (1.09 – 1.31)‡                                      | 1.23 (1.13 – 1.35)‡ | 1.19 (1.06 – 1.33)‡ | 0.00 (-0.15 – 0.14)  |  |
|            | 3rd             | 84.1 (76.2 – 92.2)                                         | 51.0 (45.3 – 57.2)    | 27.5 (19.9 – 37.8)   | 56.5 (43.7 – 67.5)§        | 67.2% (54.4 – 76.5)§         | 1.06 (0.98 – 1.12)                                       | 1.02 (0.95 – 1.09)  | 1.02 (0.93 – 1.10)  | -0.04 (-0.12 – 0.04) |  |
|            | 4th             | 70.4 (61.5 – 79.9)                                         | 41.3 (35.4 – 47.9)    | 22.6 (16.0 – 31.8)   | 47.8 (35.4 – 59.1)§        | 67.9% (54.2 – 77.6)§         | 0.88 (0.79 – 0.99)‡                                      | 0.83 (0.73 – 0.93)‡ | 0.83 (0.72 – 0.96)‡ | -0.05 (-0.18 – 0.09) |  |
|            | 5th             | 42.2 (34.6 – 50.8)                                         | 25.9 (20.8 – 31.6)    | 14.6 (9.9 – 21.2)    | 27.6 (19.0 – 36.1)§        | 65.4% (49.7 – 76.2)§         | 0.53 (0.44 – 0.63)‡                                      | 0.52 (0.43 – 0.62)‡ | 0.54 (0.43 – 0.67)‡ | 0.01 (-0.09 – 0.12)  |  |
| Mozambique | 1st             | 267.9 (234.4 – 306.3)                                      | 190.5 (171.8 – 211.1) | 86.4 (62.7 – 119.7)  | 181.5 (137.1 – 223.6)§     | 67.8% (54.7 – 76.9)§         | 1.08 (0.97 – 1.20)                                       | 1.08 (1.01 – 1.16)‡ | 1.21 (1.08 – 1.36)‡ | 0.13 (-0.04 – 0.30)  |  |
|            | 2nd             | 277.1 (246.8 – 310.2)                                      | 192.4 (173.4 – 212.3) | 79.7 (58.3 – 109.2)  | 197.4 (157.4 – 235.7)§     | 71.2% (60.2 – 79.1)§         | 1.12 (1.03 – 1.21)‡                                      | 1.10 (1.03 – 1.17)‡ | 1.12 (1.01 – 1.22)‡ | 0.00 (-0.14 – 0.13)  |  |
|            | 3rd             | 259.3 (235.1 – 284.4)                                      | 184.3 (168.3 – 201.1) | 73.0 (54.0 – 98.9)   | 186.2 (152.4 – 215.8)§     | 71.8% (61.5 – 79.3)§         | 1.05 (0.99 – 1.10)                                       | 1.05 (1.00 – 1.10)  | 1.02 (0.96 – 1.09)  | -0.02 (-0.10 – 0.05) |  |
|            | 4th             | 249.5 (219.3 – 282.7)                                      | 180.3 (163.2 – 199.3) | 63.6 (46.1 – 87.9)   | 185.9 (149.0 – 220.6)§     | 74.5% (64.1 – 81.6)§         | 1.01 (0.91 – 1.11)                                       | 1.03 (0.96 – 1.10)  | 0.89 (0.80 – 0.99)‡ | -0.12 (-0.25 – 0.02) |  |
|            | 5th             | 184.7 (158.4 – 214.4)                                      | 130.5 (116.2 – 146.3) | 53.8 (38.4 – 75.1)   | 131.0 (98.9 – 162.0)§      | 70.9% (58.3 – 79.3)§         | 0.75 (0.65 – 0.84)‡                                      | 0.74 (0.68 – 0.81)‡ | 0.75 (0.66 – 0.86)‡ | 0.01 (-0.12 – 0.14)  |  |
| Myanmar    | 1st             | 139.4 (114.3 – 166.4)                                      | 111.4 (93.1 – 132.4)  | 66.2 (48.5 – 86.9)   | 73.2 (45.1 – 101.4)§       | 52.5% (36.1 – 65.1)§         | 1.21 (1.01 – 1.41)‡                                      | 1.24 (1.05 – 1.44)‡ | 1.30 (1.11 – 1.51)‡ | 0.10 (-0.09 – 0.28)  |  |
|            | 2nd             | 132.0 (113.9 – 151.0)                                      | 103.9 (90.3 – 118.9)  | 60.4 (45.6 – 78.2)   | 71.6 (47.5 – 95.2)§        | 54.2% (39.0 – 66.0)§         | 1.14 (1.01 – 1.27)‡                                      | 1.15 (1.03 – 1.28)‡ | 1.19 (1.06 – 1.32)‡ | 0.05 (-0.10 – 0.19)  |  |
|            | 3rd             | 122.7 (108.7 – 137.3)                                      | 95.1 (84.7 – 106.1)   | 52.0 (39.4 – 66.3)   | 70.7 (51.9 – 89.1)§        | 57.7% (45.2 – 68.3)§         | 1.06 (0.98 – 1.14)                                       | 1.06 (0.97 – 1.14)  | 1.02 (0.94 – 1.10)  | -0.04 (-0.12 – 0.04) |  |
|            | 4th             | 105.4 (89.3 – 123.2)                                       | 79.7 (67.8 – 92.4)    | 42.8 (31.8 – 55.8)   | 62.6 (43.8 – 82.3)§        | 59.4% (45.6 – 70.4)§         | 0.91 (0.79 – 1.03)                                       | 0.89 (0.77 – 1.00)‡ | 0.84 (0.73 – 0.96)‡ | -0.07 (-0.20 – 0.06) |  |
|            | 5th             | 77.9 (57.4 – 103.3)                                        | 59.9 (44.9 – 79.1)    | 32.6 (22.2 – 46.4)   | 45.3 (27.5 – 66.0)§        | 58.2% (42.5 – 69.9)§         | 0.67 (0.50 – 0.88)‡                                      | 0.67 (0.51 – 0.87)‡ | 0.64 (0.48 – 0.84)‡ | -0.03 (-0.16 – 0.09) |  |
| Namibia    | 1st             | 81.7 (70.7 – 93.6)                                         | 85.7 (74.4 – 98.3)    | 56.2 (37.8 – 83.8)   | 25.5 (-3.4 – 46.2)         | 31.2% (-4.4 – 53.8)          | 1.15 (1.02 – 1.28)‡                                      | 1.15 (1.03 – 1.28)‡ | 1.24 (1.08 – 1.42)‡ | 0.10 (-0.07 – 0.28)  |  |
|            | 2nd             | 84.5 (74.6 – 95.1)                                         | 88.7 (78.0 – 100.1)   | 53.9 (36.7 – 79.9)   | 30.6 (3.0 – 50.4)§         | 36.2% (3.9 – 56.9)§          | 1.19 (1.08 – 1.29)‡                                      | 1.19 (1.08 – 1.29)‡ | 1.19 (1.07 – 1.32)‡ | 0.01 (-0.13 – 0.15)  |  |
|            | 3rd             | 74.8 (66.6 – 82.8)                                         | 78.5 (70.4 – 87.1)    | 46.3 (31.7 – 67.9)   | 28.4 (5.8 – 44.6)§         | 38.1% (7.6 – 57.8)§          | 1.05 (0.98 – 1.11)                                       | 1.05 (0.99 – 1.12)  | 1.02 (0.95 – 1.10)  | -0.02 (-0.10 – 0.05) |  |
|            | 4th             | 66.2 (57.5 – 76.2)                                         | 70.0 (60.9 – 80.3)    | 40.1 (27.1 – 60.0)   | 26.1 (5.3 – 41.8)§         | 39.4% (8.2 – 59.6)§          | 0.93 (0.83 – 1.04)                                       | 0.94 (0.84 – 1.05)  | 0.89 (0.78 – 1.01)  | -0.04 (-0.17 – 0.09) |  |
|            | 5th             | 49.3 (40.9 – 58.9)                                         | 50.2 (41.5 – 60.1)    | 29.4 (19.3 – 45.0)   | 19.9 (3.7 – 32.3)§         | 40.3% (8.0 – 61.0)§          | 0.69 (0.59 – 0.81)‡                                      | 0.67 (0.57 – 0.78)‡ | 0.65 (0.53 – 0.78)‡ | -0.04 (-0.16 – 0.08) |  |
| Nepal      | 1st             | 153.9 (136.4 – 172.8)                                      | 96.2 (85.9 – 106.9)   | 44.1 (35.4 – 55.1)   | 109.8 (89.5 – 129.4)§      | 71.3% (63.4 – 77.5)§         | 1.09 (0.99 – 1.20)                                       | 1.18 (1.07 – 1.28)‡ | 1.28 (1.12 – 1.45)‡ | 0.19 (0.01 – 0.37)§  |  |
|            | 2nd             | 163.0 (147.1 – 179.7)                                      | 95.1 (85.9 – 104.8)   | 41.1 (33.3 – 50.7)   | 121.8 (103.9 – 139.7)§     | 74.8% (68.3 – 79.9)§         | 1.16 (1.07 – 1.25)‡                                      | 1.16 (1.08 – 1.25)‡ | 1.19 (1.07 – 1.31)‡ | 0.04 (-0.11 – 0.18)  |  |
|            | 3rd             | 154.9 (142.2 – 168.2)                                      | 88.7 (81.3 – 96.4)    | 35.6 (29.2 – 43.4)   | 119.3 (105.0 – 133.6)§     | 77.0% (71.6 – 81.4)§         | 1.10 (1.04 – 1.16)‡                                      | 1.09 (1.03 – 1.15)‡ | 1.03 (0.96 – 1.10)  | -0.07 (-0.15 – 0.01) |  |
|            | 4th             | 137.8 (123.1 – 154.3)                                      | 74.1 (66.2 – 82.3)    | 29.5 (23.7 – 36.9)   | 108.3 (92.5 – 125.2)§      | 78.6% (72.9 – 83.1)§         | 0.98 (0.89 – 1.07)                                       | 0.91 (0.83 – 0.99)‡ | 0.86 (0.75 – 0.96)‡ | -0.12 (-0.26 – 0.01) |  |
|            | 5th             | 95.0 (81.4 – 109.3)                                        | 54.4 (47.2 – 62.5)    | 22.2 (17.3 – 28.7)   | 72.8 (59.2 – 86.8)§        | 76.6% (69.5 – 82.0)§         | 0.67 (0.59 – 0.77)‡                                      | 0.67 (0.59 – 0.75)‡ | 0.64 (0.54 – 0.76)‡ | -0.03 (-0.14 – 0.09) |  |
| Nicaragua  | 1st             | 81.4 (69.8 – 94.2)                                         | 51.0 (43.2 – 59.7)    | 26.1 (16.1 – 43.1)   | 55.3 (36.6 – 70.4)§        | 67.9% (47.1 – 80.4)§         | 1.21 (1.06 – 1.37)‡                                      | 1.26 (1.10 – 1.43)‡ | 1.33 (1.12 – 1.55)‡ | 0.12 (-0.08 – 0.33)  |  |
|            | 2nd             | 81.9 (72.5 – 92.3)                                         | 49.4 (43.0 – 56.3)    | 23.5 (14.6 – 37.9)   | 58.4 (41.7 – 72.2)§        | 71.3% (53.4 – 82.2)§         | 1.21 (1.10 – 1.33)‡                                      | 1.22 (1.10 – 1.35)‡ | 1.19 (1.05 – 1.33)‡ | -0.02 (-0.18 – 0.14) |  |
|            | 3rd             | 71.8 (64.7 – 79.4)                                         | 42.0 (37.4 – 47.0)    | 20.3 (12.7 – 32.5)   | 51.5 (37.8 – 62.0)§        | 71.8% (54.2 – 82.3)§         | 1.06 (0.99 – 1.14)                                       | 1.04 (0.96 – 1.12)  | 1.03 (0.94 – 1.12)  | -0.04 (-0.12 – 0.05) |  |
|            | 4th             | 60.7 (52.7 – 69.7)                                         | 35.1 (30.1 – 40.9)    | 16.5 (10.3 – 26.8)   | 44.3 (31.6 – 54.9)§        | 72.9% (54.9 – 83.4)§         | 0.90 (0.80 – 1.01)                                       | 0.87 (0.76 – 0.98)‡ | 0.84 (0.71 – 0.97)‡ | -0.06 (-0.21 – 0.08) |  |
|            | 5th             | 41.6 (33.1 – 51.9)                                         | 24.5 (19.3 – 30.8)    | 12.2 (7.1 – 20.4)    | 29.5 (19.4 – 39.0)§        | 70.8% (51.7 – 82.4)§         | 0.62 (0.50 – 0.76)‡                                      | 0.61 (0.48 – 0.75)‡ | 0.62 (0.48 – 0.78)‡ | 0.00 (-0.12 – 0.13)  |  |

Continued on next page

‡: Ratio is significantly different from one.

§: Change/decline is significantly different from zero.

Absolute decline: wealth quintile-specific U5MR (1990) - wealth quintile-specific U5MR (2016).

Percentage decline: absolute decline over wealth quintile-specific U5MR (1990) × 100.

Change in ratio: ratio (2016) - ratio (1990).

Table 8 – continued from previous page

|                       | Wealth Quintile | wealth quintile-specific U5MR (deaths per 1000 livebirths) |                       |                       |                            |                              | Ratio of wealth quintile-specific to national-level U5MR |                     |                     |                        |  |
|-----------------------|-----------------|------------------------------------------------------------|-----------------------|-----------------------|----------------------------|------------------------------|----------------------------------------------------------|---------------------|---------------------|------------------------|--|
|                       |                 | 1990                                                       | 2000                  | 2016                  | Absolute decline 1990–2016 | Percentage decline 1990–2016 | 1990                                                     | 2000                | 2016                | Change 1990–2016       |  |
| Niger                 | 1st             | 305.4 (272.0 – 341.9)                                      | 206.1 (185.5 – 228.5) | 96.5 (67.8 – 138.1)   | 208.9 (156.1 – 254.1)§     | 68.4% (54.2 – 78.2)§         | 0.93 (0.84 – 1.02)                                       | 0.91 (0.84 – 0.98)‡ | 1.06 (0.93 – 1.20)  | 0.13 (-0.02 – 0.28)    |  |
|                       | 2nd             | 395.2 (357.3 – 435.4)                                      | 266.4 (240.6 – 293.3) | 106.9 (74.9 – 152.8)  | 288.3 (232.7 – 340.7)§     | 73.0% (61.2 – 81.2)§         | 1.20 (1.11 – 1.29)‡                                      | 1.18 (1.10 – 1.25)‡ | 1.17 (1.06 – 1.28)‡ | -0.03 (-0.17 – 0.10)   |  |
|                       | 3rd             | 360.4 (332.0 – 390.3)                                      | 247.4 (226.2 – 269.6) | 98.7 (69.9 – 138.9)   | 261.7 (214.6 – 302.2)§     | 72.6% (61.4 – 80.7)§         | 1.10 (1.04 – 1.15)‡                                      | 1.09 (1.04 – 1.14)‡ | 1.08 (1.02 – 1.14)‡ | -0.01 (-0.09 – 0.06)   |  |
|                       | 4th             | 349.5 (313.6 – 386.9)                                      | 246.7 (222.4 – 272.7) | 87.6 (61.2 – 124.5)   | 261.9 (210.6 – 307.8)§     | 74.9% (63.7 – 82.8)§         | 1.06 (0.97 – 1.15)                                       | 1.09 (1.01 – 1.17)‡ | 0.96 (0.86 – 1.07)  | -0.10 (-0.24 – 0.03)   |  |
|                       | 5th             | 234.0 (205.3 – 264.1)                                      | 166.0 (147.7 – 186.5) | 66.9 (46.2 – 96.9)    | 167.1 (126.5 – 203.4)§     | 71.4% (57.9 – 80.4)§         | 0.71 (0.64 – 0.79)‡                                      | 0.73 (0.67 – 0.80)‡ | 0.73 (0.63 – 0.85)‡ | 0.02 (-0.10 – 0.15)    |  |
| Nigeria               | 1st             | 253.5 (225.3 – 284.2)                                      | 226.3 (206.1 – 247.1) | 140.1 (101.4 – 189.5) | 113.4 (58.4 – 160.2)§      | 44.7% (24.0 – 60.1)§         | 1.19 (1.08 – 1.31)‡                                      | 1.21 (1.13 – 1.29)‡ | 1.34 (1.21 – 1.48)‡ | 0.15 (-0.02 – 0.32)    |  |
|                       | 2nd             | 254.7 (230.1 – 281.4)                                      | 233.2 (213.5 – 254.3) | 125.0 (92.0 – 169.4)  | 129.7 (80.3 – 170.0)§      | 50.9% (32.8 – 64.1)§         | 1.20 (1.10 – 1.29)‡                                      | 1.24 (1.17 – 1.32)‡ | 1.20 (1.10 – 1.31)‡ | 0.00 (-0.13 – 0.14)    |  |
|                       | 3rd             | 231.2 (211.9 – 251.0)                                      | 202.7 (186.9 – 218.7) | 111.8 (82.5 – 149.6)  | 119.4 (78.9 – 152.4)§      | 51.7% (34.8 – 64.2)§         | 1.09 (1.03 – 1.14)‡                                      | 1.08 (1.03 – 1.13)‡ | 1.07 (1.01 – 1.13)‡ | -0.01 (-0.09 – 0.06)   |  |
|                       | 4th             | 200.6 (177.7 – 224.9)                                      | 172.2 (155.7 – 189.7) | 87.1 (63.2 – 118.1)   | 113.6 (76.1 – 145.7)§      | 56.6% (40.3 – 68.5)§         | 0.94 (0.85 – 1.04)                                       | 0.92 (0.85 – 0.99)‡ | 0.83 (0.75 – 0.93)‡ | -0.11 (-0.23 – 0.01)   |  |
|                       | 5th             | 124.5 (109.4 – 142.2)                                      | 102.6 (91.6 – 114.2)  | 57.5 (41.5 – 79.2)    | 67.0 (42.3 – 89.5)§        | 53.8% (35.8 – 67.1)§         | 0.58 (0.52 – 0.65)‡                                      | 0.55 (0.50 – 0.60)‡ | 0.55 (0.49 – 0.63)‡ | -0.03 (-0.13 – 0.06)   |  |
| Pakistan              | 1st             | 160.0 (142.3 – 178.1)                                      | 135.7 (121.2 – 151.0) | 98.4 (74.4 – 130.4)   | 61.6 (26.9 – 90.8)§        | 38.5% (17.5 – 54.1)§         | 1.15 (1.03 – 1.28)‡                                      | 1.20 (1.08 – 1.33)‡ | 1.25 (1.10 – 1.41)‡ | 0.10 (-0.07 – 0.27)    |  |
|                       | 2nd             | 161.0 (145.9 – 176.6)                                      | 131.0 (118.8 – 143.5) | 92.1 (70.1 – 120.7)   | 68.9 (37.3 – 94.9)§        | 42.8% (23.9 – 56.9)§         | 1.16 (1.06 – 1.26)‡                                      | 1.16 (1.07 – 1.26)‡ | 1.17 (1.06 – 1.28)‡ | 0.01 (-0.13 – 0.14)    |  |
|                       | 3rd             | 148.5 (138.2 – 158.7)                                      | 120.6 (111.9 – 129.6) | 82.7 (63.6 – 108.1)   | 65.8 (39.0 – 87.2)§        | 44.3% (26.8 – 57.2)§         | 1.07 (1.01 – 1.13)‡                                      | 1.07 (1.01 – 1.13)‡ | 1.05 (0.98 – 1.12)  | -0.02 (-0.09 – 0.05)   |  |
|                       | 4th             | 132.2 (118.5 – 146.4)                                      | 100.7 (90.1 – 111.5)  | 68.8 (51.8 – 91.6)    | 63.4 (37.4 – 85.0)§        | 48.0% (29.5 – 61.2)§         | 0.95 (0.86 – 1.05)                                       | 0.89 (0.81 – 0.98)‡ | 0.87 (0.78 – 0.98)‡ | -0.08 (-0.20 – 0.05)   |  |
|                       | 5th             | 92.2 (79.1 – 106.6)                                        | 76.0 (65.6 – 87.5)    | 52.0 (38.0 – 70.3)    | 40.3 (20.2 – 58.4)§        | 43.7% (23.2 – 59.1)§         | 0.66 (0.57 – 0.77)‡                                      | 0.67 (0.59 – 0.77)‡ | 0.66 (0.56 – 0.77)‡ | -0.01 (-0.12 – 0.11)   |  |
| Paraguay              | 1st             | 58.7 (49.1 – 69.7)                                         | 43.2 (34.8 – 52.8)    | 26.6 (15.8 – 44.1)    | 32.1 (13.5 – 46.4)§        | 54.7% (24.5 – 73.1)§         | 1.26 (1.09 – 1.44)‡                                      | 1.28 (1.09 – 1.49)‡ | 1.33 (1.12 – 1.57)‡ | 0.08 (-0.12 – 0.29)    |  |
|                       | 2nd             | 55.4 (47.6 – 64.0)                                         | 39.9 (33.0 – 47.7)    | 23.4 (14.1 – 38.0)    | 32.0 (16.3 – 43.8)§        | 57.8% (30.6 – 74.6)§         | 1.19 (1.06 – 1.32)‡                                      | 1.19 (1.05 – 1.32)‡ | 1.18 (1.03 – 1.32)‡ | -0.01 (-0.18 – 0.14)   |  |
|                       | 3rd             | 48.6 (42.5 – 55.1)                                         | 34.6 (29.5 – 40.7)    | 20.4 (12.4 – 33.0)    | 28.2 (15.0 – 38.1)§        | 58.1% (31.8 – 74.6)§         | 1.04 (0.96 – 1.12)                                       | 1.03 (0.95 – 1.11)  | 1.02 (0.93 – 1.12)  | -0.02 (-0.11 – 0.06)   |  |
|                       | 4th             | 41.1 (34.8 – 48.3)                                         | 29.3 (24.0 – 35.6)    | 16.6 (9.9 – 27.2)     | 24.5 (12.8 – 33.8)§        | 59.6% (33.2 – 76.0)§         | 0.88 (0.77 – 1.00)‡                                      | 0.87 (0.75 – 1.00)‡ | 0.84 (0.70 – 0.98)‡ | -0.05 (-0.20 – 0.10)   |  |
|                       | 5th             | 29.2 (21.8 – 38.1)                                         | 21.1 (15.4 – 28.2)    | 12.6 (7.2 – 21.7)     | 16.6 (7.3 – 25.0)§         | 56.9% (27.5 – 74.3)§         | 0.63 (0.47 – 0.80)‡                                      | 0.63 (0.47 – 0.81)‡ | 0.63 (0.47 – 0.83)‡ | 0.01 (-0.11 – 0.14)    |  |
| Peru                  | 1st             | 118.7 (108.1 – 129.3)                                      | 59.1 (53.3 – 65.1)    | 23.9 (18.0 – 32.1)    | 94.8 (81.5 – 106.6)§       | 79.8% (72.5 – 84.9)§         | 1.48 (1.37 – 1.58)‡                                      | 1.53 (1.42 – 1.65)‡ | 1.56 (1.38 – 1.76)‡ | 0.09 (-0.13 – 0.31)    |  |
|                       | 2nd             | 100.4 (91.4 – 109.6)                                       | 48.2 (43.5 – 53.3)    | 18.2 (13.8 – 24.5)    | 82.2 (71.4 – 92.5)§        | 81.9% (75.2 – 86.5)§         | 1.25 (1.16 – 1.34)‡                                      | 1.25 (1.16 – 1.35)‡ | 1.19 (1.05 – 1.33)‡ | -0.06 (-0.22 – 0.10)   |  |
|                       | 3rd             | 82.0 (75.4 – 88.8)                                         | 38.0 (34.3 – 41.6)    | 15.1 (11.5 – 20.1)    | 66.8 (59.1 – 74.2)§        | 81.5% (75.3 – 85.9)§         | 1.02 (0.95 – 1.08)                                       | 0.99 (0.92 – 1.05)  | 0.99 (0.90 – 1.08)  | -0.03 (-0.12 – 0.06)   |  |
|                       | 4th             | 61.9 (55.4 – 68.7)                                         | 28.5 (25.1 – 32.3)    | 11.4 (8.3 – 15.6)     | 50.5 (43.1 – 57.7)§        | 81.6% (74.5 – 86.8)§         | 0.77 (0.70 – 0.85)‡                                      | 0.74 (0.67 – 0.82)‡ | 0.75 (0.62 – 0.87)‡ | -0.02 (-0.16 – 0.11)   |  |
|                       | 5th             | 39.1 (33.4 – 45.1)                                         | 18.7 (15.9 – 21.9)    | 7.8 (5.6 – 11.0)      | 31.2 (25.4 – 37.2)§        | 80.0% (71.5 – 85.6)§         | 0.49 (0.42 – 0.55)‡                                      | 0.49 (0.42 – 0.56)‡ | 0.51 (0.41 – 0.63)‡ | 0.02 (-0.07 – 0.14)    |  |
| Philippines           | 1st             | 87.5 (78.5 – 97.1)                                         | 60.7 (53.9 – 68.1)    | 41.2 (29.6 – 57.1)    | 46.3 (29.1 – 60.6)§        | 52.9% (34.5 – 66.3)§         | 1.51 (1.38 – 1.64)‡                                      | 1.53 (1.40 – 1.66)‡ | 1.52 (1.34 – 1.70)‡ | 0.01 (-0.18 – 0.21)    |  |
|                       | 2nd             | 68.6 (61.6 – 75.9)                                         | 47.4 (42.4 – 52.9)    | 31.5 (22.6 – 43.2)    | 37.1 (23.9 – 48.6)§        | 54.1% (36.2 – 67.5)§         | 1.18 (1.09 – 1.28)‡                                      | 1.19 (1.10 – 1.29)‡ | 1.16 (1.05 – 1.28)‡ | -0.02 (-0.16 – 0.12)   |  |
|                       | 3rd             | 58.5 (53.2 – 64.1)                                         | 39.2 (35.4 – 43.3)    | 26.8 (19.5 – 36.7)    | 31.7 (20.8 – 40.5)§        | 54.1% (36.7 – 67.0)§         | 1.01 (0.94 – 1.07)                                       | 0.99 (0.92 – 1.05)  | 0.99 (0.91 – 1.06)  | -0.02 (-0.09 – 0.06)   |  |
|                       | 4th             | 45.3 (39.6 – 51.2)                                         | 31.1 (27.1 – 35.3)    | 21.8 (15.6 – 30.3)    | 23.5 (13.8 – 31.8)§        | 51.9% (32.3 – 65.9)§         | 0.78 (0.69 – 0.86)‡                                      | 0.78 (0.70 – 0.87)‡ | 0.80 (0.70 – 0.91)‡ | 0.02 (-0.09 – 0.15)    |  |
|                       | 5th             | 30.6 (25.8 – 36.0)                                         | 20.1 (16.8 – 24.1)    | 14.2 (9.8 – 20.3)     | 16.4 (9.7 – 22.6)§         | 53.7% (33.6 – 67.8)§         | 0.53 (0.45 – 0.61)‡                                      | 0.51 (0.43 – 0.59)‡ | 0.52 (0.43 – 0.63)‡ | 0.00 (-0.10 – 0.09)    |  |
| Republic of Moldova   | 1st             | 42.9 (33.9 – 53.3)                                         | 40.3 (31.3 – 51.3)    | 21.5 (14.3 – 33.0)    | 21.4 (8.0 – 33.0)§         | 49.8% (20.7 – 67.1)§         | 1.30 (1.08 – 1.52)‡                                      | 1.30 (1.08 – 1.52)‡ | 1.35 (1.11 – 1.61)‡ | 0.05 (-0.17 – 0.29)    |  |
|                       | 2nd             | 38.1 (31.2 – 46.1)                                         | 35.9 (28.9 – 44.6)    | 18.2 (12.5 – 27.2)    | 19.9 (8.6 – 29.6)§         | 52.2% (24.8 – 68.4)§         | 1.16 (1.02 – 1.30)‡                                      | 1.15 (1.02 – 1.30)‡ | 1.15 (0.99 – 1.31)  | -0.01 (-0.18 – 0.16)   |  |
|                       | 3rd             | 33.0 (27.5 – 39.0)                                         | 31.1 (25.3 – 37.8)    | 15.8 (11.0 – 23.5)    | 17.1 (7.7 – 24.7)§         | 52.0% (25.9 – 67.5)§         | 1.00 (0.91 – 1.08)                                       | 1.00 (0.91 – 1.08)  | 1.00 (0.89 – 1.09)  | 0.00 (-0.09 – 0.08)    |  |
|                       | 4th             | 27.6 (22.2 – 33.6)                                         | 25.9 (20.5 – 32.4)    | 12.6 (8.5 – 19.4)     | 15.0 (6.7 – 22.0)§         | 54.3% (26.8 – 70.2)§         | 0.84 (0.72 – 0.95)‡                                      | 0.83 (0.72 – 0.95)‡ | 0.79 (0.65 – 0.94)‡ | -0.04 (-0.20 – 0.11)   |  |
|                       | 5th             | 23.5 (17.0 – 32.0)                                         | 22.3 (16.0 – 31.1)    | 11.4 (7.2 – 18.4)     | 12.1 (4.3 – 19.7)§         | 51.6% (21.2 – 68.4)§         | 0.71 (0.53 – 0.93)‡                                      | 0.72 (0.55 – 0.94)‡ | 0.71 (0.54 – 0.95)‡ | 0.00 (-0.13 – 0.15)    |  |
| Rwanda                | 1st             | 149.4 (133.0 – 167.2)                                      | 199.8 (177.5 – 224.6) | 47.9 (30.1 – 75.4)    | 101.4 (69.5 – 125.8)§      | 67.9% (48.5 – 79.9)§         | 0.99 (0.89 – 1.09)                                       | 1.03 (0.94 – 1.12)  | 1.25 (1.10 – 1.40)‡ | 0.25 (0.09 – 0.43)§    |  |
|                       | 2nd             | 167.8 (151.6 – 185.0)                                      | 206.9 (185.0 – 230.6) | 43.4 (27.3 – 68.1)    | 124.4 (96.2 – 146.8)§      | 74.1% (59.4 – 83.6)§         | 1.11 (1.03 – 1.20)‡                                      | 1.06 (0.98 – 1.14)  | 1.13 (1.02 – 1.25)‡ | 0.01 (-0.12 – 0.15)    |  |
|                       | 3rd             | 157.0 (144.5 – 170.7)                                      | 202.7 (184.4 – 223.1) | 38.4 (24.4 – 60.1)    | 118.5 (94.4 – 137.2)§      | 75.5% (61.5 – 84.4)§         | 1.04 (0.99 – 1.10)                                       | 1.04 (0.99 – 1.10)  | 1.00 (0.93 – 1.07)  | -0.04 (-0.12 – 0.03)   |  |
|                       | 4th             | 157.7 (141.5 – 174.6)                                      | 212.2 (190.3 – 236.7) | 34.3 (21.6 – 54.1)    | 123.4 (98.6 – 144.2)§      | 78.2% (65.3 – 86.3)§         | 1.05 (0.96 – 1.14)                                       | 1.09 (1.01 – 1.18)‡ | 0.89 (0.79 – 1.00)‡ | -0.16 (-0.29 – -0.03)§ |  |
|                       | 5th             | 121.2 (107.3 – 136.6)                                      | 151.9 (133.6 – 171.7) | 28.4 (17.7 – 45.2)    | 92.8 (72.0 – 111.4)§       | 76.6% (62.3 – 85.4)§         | 0.80 (0.72 – 0.89)‡                                      | 0.78 (0.71 – 0.86)‡ | 0.74 (0.63 – 0.85)‡ | -0.07 (-0.20 – 0.06)   |  |
| Sao Tome and Principe | 1st             | 119.1 (96.0 – 144.9)                                       | 96.0 (77.4 – 116.9)   | 41.9 (26.9 – 63.0)    | 77.2 (48.2 – 104.3)§       | 64.8% (45.1 – 77.5)§         | 1.14 (0.96 – 1.32)                                       | 1.15 (0.98 – 1.34)  | 1.24 (1.04 – 1.44)‡ | 0.10 (-0.09 – 0.30)    |  |
|                       | 2nd             | 114.3 (96.1 – 134.7)                                       | 91.4 (76.3 – 108.2)   | 38.4 (25.0 – 57.9)    | 75.9 (49.5 – 99.5)§        | 66.4% (48.1 – 78.5)§         | 1.09 (0.97 – 1.21)                                       | 1.10 (0.98 – 1.22)  | 1.14 (1.01 – 1.27)‡ | 0.05 (-0.10 – 0.20)    |  |
|                       | 3rd             | 107.9 (92.6 – 124.9)                                       | 85.0 (72.8 – 99.3)    | 33.4 (22.0 – 50.0)    | 74.5 (52.7 – 94.5)§        | 69.0% (52.7 – 80.0)§         | 1.03 (0.95 – 1.11)                                       | 1.02 (0.94 – 1.10)  | 0.99 (0.91 – 1.07)  | -0.04 (-0.12 – 0.04)   |  |
|                       | 4th             | 91.6 (75.7 – 109.5)                                        | 72.0 (59.3 – 86.5)    | 28.1 (18.3 – 42.5)    | 63.6 (43.0 – 82.5)§        | 69.4% (51.8 – 80.5)§         | 0.87 (0.76 – 0.99)‡                                      | 0.87 (0.76 – 0.98)‡ | 0.83 (0.72 – 0.95)‡ | -0.04 (-0.17 – 0.09)   |  |
|                       | 5th             | 91.0 (70.6 – 115.9)                                        | 71.6 (55.7 – 91.2)    | 27.2 (17.1 – 42.8)    | 63.9 (42.0 – 87.4)§        | 70.1% (53.0 – 81.1)§         | 0.87 (0.70 – 1.07)                                       | 0.86 (0.70 – 1.05)  | 0.80 (0.64 – 1.00)  | -0.06 (-0.22 – 0.08)   |  |

Continued on next page

‡: Ratio is significantly different from one.

§: Change/decline is significantly different from zero.

Absolute decline: wealth quintile-specific U5MR (1990) - wealth quintile-specific U5MR (2016).

Percentage decline: absolute decline over wealth quintile-specific U5MR (1990) × 100.

Change in ratio: ratio (2016) - ratio (1990).



Table 8 – continued from previous page

|                    | Wealth Quintile | wealth quintile-specific U5MR (deaths per 1000 livebirths) |                       |                      |                            |                              | Ratio of wealth quintile-specific to national-level U5MR |                     |                     |                        |  |
|--------------------|-----------------|------------------------------------------------------------|-----------------------|----------------------|----------------------------|------------------------------|----------------------------------------------------------|---------------------|---------------------|------------------------|--|
|                    |                 | 1990                                                       | 2000                  | 2016                 | Absolute decline 1990–2016 | Percentage decline 1990–2016 | 1990                                                     | 2000                | 2016                | Change 1990–2016       |  |
| Senegal            | 1st             | 179.1 (160.7 – 198.3)                                      | 173.4 (157.8 – 190.6) | 65.1 (50.4 – 84.7)   | 114.0 (88.3 – 138.0)§      | 63.6% (52.2 – 72.2)§         | 1.28 (1.16 – 1.39)‡                                      | 1.29 (1.20 – 1.39)‡ | 1.38 (1.24 – 1.52)‡ | 0.11 (-0.07 – 0.28)    |  |
|                    | 2nd             | 162.4 (147.4 – 178.2)                                      | 154.9 (141.2 – 169.4) | 55.6 (43.2 – 71.9)   | 106.8 (85.2 – 126.7)§      | 65.8% (54.8 – 73.6)§         | 1.16 (1.06 – 1.25)‡                                      | 1.15 (1.08 – 1.23)‡ | 1.18 (1.08 – 1.29)‡ | 0.02 (-0.11 – 0.16)    |  |
|                    | 3rd             | 148.9 (138.1 – 160.2)                                      | 142.1 (131.1 – 154.1) | 47.9 (37.6 – 61.5)   | 101.0 (84.4 – 115.8)§      | 67.8% (58.5 – 74.9)§         | 1.06 (1.00 – 1.12)‡                                      | 1.06 (1.00 – 1.12)‡ | 1.02 (0.95 – 1.08)  | -0.04 (-0.12 – 0.03)   |  |
|                    | 4th             | 125.5 (111.5 – 140.3)                                      | 118.1 (105.9 – 131.5) | 39.4 (30.3 – 51.4)   | 86.1 (67.7 – 103.3)§       | 68.6% (58.1 – 76.3)§         | 0.89 (0.80 – 0.99)‡                                      | 0.88 (0.80 – 0.96)‡ | 0.84 (0.74 – 0.93)‡ | -0.06 (-0.18 – 0.07)   |  |
|                    | 5th             | 86.2 (74.2 – 99.7)                                         | 82.5 (71.9 – 94.0)    | 27.6 (20.8 – 36.7)   | 58.6 (45.0 – 72.2)§        | 68.0% (56.5 – 76.1)§         | 0.61 (0.53 – 0.70)‡                                      | 0.61 (0.54 – 0.69)‡ | 0.59 (0.50 – 0.68)‡ | -0.03 (-0.13 – 0.08)   |  |
| Serbia             | 1st             | 37.3 (31.1 – 44.2)                                         | 17.3 (14.2 – 20.9)    | 7.9 (6.3 – 10.0)     | 29.4 (23.7 – 35.5)§        | 78.8% (73.6 – 82.6)§         | 1.32 (1.10 – 1.56)‡                                      | 1.37 (1.12 – 1.64)‡ | 1.37 (1.11 – 1.64)‡ | 0.04 (-0.18 – 0.28)    |  |
|                    | 2nd             | 32.6 (28.5 – 36.6)                                         | 14.6 (12.5 – 16.6)    | 6.7 (5.5 – 8.0)      | 25.9 (22.0 – 29.6)§        | 79.5% (75.2 – 83.0)§         | 1.15 (1.01 – 1.29)‡                                      | 1.15 (0.99 – 1.31)  | 1.15 (0.99 – 1.31)  | -0.01 (-0.17 – 0.16)   |  |
|                    | 3rd             | 28.2 (25.6 – 30.7)                                         | 12.6 (11.3 – 13.9)    | 5.8 (4.9 – 6.8)      | 22.4 (20.0 – 24.6)§        | 79.5% (76.1 – 82.2)§         | 1.00 (0.91 – 1.09)                                       | 1.00 (0.89 – 1.10)  | 1.00 (0.89 – 1.10)  | 0.00 (-0.09 – 0.08)    |  |
|                    | 4th             | 23.6 (20.1 – 27.2)                                         | 10.1 (8.2 – 12.0)     | 4.6 (3.7 – 5.8)      | 18.9 (15.6 – 22.4)§        | 80.3% (75.4 – 84.4)§         | 0.84 (0.71 – 0.96)‡                                      | 0.80 (0.65 – 0.95)‡ | 0.80 (0.65 – 0.95)‡ | -0.04 (-0.20 – 0.11)   |  |
|                    | 5th             | 19.4 (14.5 – 25.8)                                         | 8.8 (6.5 – 11.7)      | 4.0 (2.9 – 5.5)      | 15.4 (11.2 – 20.7)§        | 79.4% (73.9 – 83.4)§         | 0.69 (0.51 – 0.91)‡                                      | 0.69 (0.51 – 0.93)‡ | 0.69 (0.51 – 0.92)‡ | 0.00 (-0.13 – 0.14)    |  |
| Sierra Leone       | 1st             | 280.2 (241.9 – 320.9)                                      | 255.0 (227.8 – 284.7) | 130.5 (99.8 – 165.9) | 149.7 (102.9 – 197.3)§     | 53.4% (39.5 – 65.1)§         | 1.07 (0.96 – 1.19)                                       | 1.09 (1.01 – 1.18)‡ | 1.15 (1.03 – 1.28)‡ | 0.08 (-0.09 – 0.24)    |  |
|                    | 2nd             | 275.0 (240.4 – 312.0)                                      | 243.1 (217.5 – 270.0) | 120.2 (92.6 – 150.5) | 154.8 (111.6 – 197.8)§     | 56.3% (43.9 – 66.8)§         | 1.05 (0.95 – 1.15)                                       | 1.04 (0.96 – 1.11)  | 1.06 (0.96 – 1.15)  | 0.01 (-0.12 – 0.14)    |  |
|                    | 3rd             | 268.1 (240.0 – 297.3)                                      | 238.7 (216.4 – 262.8) | 115.8 (90.4 – 144.6) | 152.2 (116.7 – 188.1)§     | 56.8% (45.5 – 66.3)§         | 1.02 (0.96 – 1.08)                                       | 1.02 (0.97 – 1.07)  | 1.02 (0.96 – 1.08)  | 0.00 (-0.07 – 0.07)    |  |
|                    | 4th             | 274.5 (240.7 – 313.2)                                      | 242.1 (216.4 – 271.3) | 103.3 (78.9 – 130.9) | 171.2 (130.1 – 214.1)§     | 62.4% (51.4 – 71.7)§         | 1.05 (0.95 – 1.16)                                       | 1.04 (0.96 – 1.12)  | 0.91 (0.82 – 1.01)  | -0.14 (-0.28 – -0.01)§ |  |
|                    | 5th             | 212.7 (179.8 – 247.8)                                      | 190.5 (167.5 – 215.8) | 97.7 (74.2 – 125.2)  | 115.0 (75.6 – 152.9)§      | 54.1% (39.4 – 65.6)§         | 0.81 (0.70 – 0.92)‡                                      | 0.81 (0.74 – 0.89)‡ | 0.86 (0.76 – 0.97)‡ | 0.05 (-0.08 – 0.19)    |  |
| Somalia            | 1st             | 195.6 (150.1 – 252.5)                                      | 188.6 (138.8 – 253.9) | 151.1 (81.3 – 282.0) | 44.5 (-69.5 – 112.3)       | 22.7% (-35.1 – 55.0)         | 1.08 (0.90 – 1.27)                                       | 1.08 (0.91 – 1.26)  | 1.14 (0.96 – 1.33)  | 0.06 (-0.11 – 0.23)    |  |
|                    | 2nd             | 205.3 (165.3 – 257.4)                                      | 198.2 (151.8 – 263.5) | 150.4 (82.4 – 279.4) | 54.9 (-56.7 – 119.2)       | 26.7% (-26.7 – 57.4)         | 1.14 (1.01 – 1.26)‡                                      | 1.14 (1.02 – 1.26)‡ | 1.14 (1.01 – 1.26)‡ | 0.00 (-0.14 – 0.14)    |  |
|                    | 3rd             | 191.7 (156.8 – 238.0)                                      | 184.7 (143.9 – 242.0) | 140.4 (78.0 – 259.8) | 51.3 (-50.3 – 110.2)       | 26.8% (-26.2 – 56.8)         | 1.06 (0.98 – 1.14)                                       | 1.06 (0.98 – 1.14)  | 1.06 (0.98 – 1.14)  | 0.00 (-0.07 – 0.07)    |  |
|                    | 4th             | 180.4 (144.0 – 228.3)                                      | 173.4 (132.4 – 231.5) | 125.3 (68.8 – 234.5) | 55.2 (-40.4 – 109.8)       | 30.6% (-21.8 – 59.3)         | 1.00 (0.88 – 1.12)                                       | 0.99 (0.88 – 1.12)  | 0.95 (0.83 – 1.07)  | -0.05 (-0.19 – 0.08)   |  |
|                    | 5th             | 131.5 (93.4 – 182.0)                                       | 127.0 (87.3 – 184.6)  | 95.4 (50.6 – 183.1)  | 36.1 (-38.3 – 83.3)        | 27.5% (-29.8 – 57.9)         | 0.73 (0.55 – 0.95)‡                                      | 0.73 (0.55 – 0.95)‡ | 0.72 (0.54 – 0.94)‡ | -0.01 (-0.13 – 0.13)   |  |
| South Africa       | 1st             | 78.7 (65.1 – 94.7)                                         | 89.9 (75.4 – 106.1)   | 59.9 (47.5 – 73.3)   | 18.8 (2.8 – 36.1)§         | 23.9% (3.9 – 40.9)§          | 1.37 (1.19 – 1.56)‡                                      | 1.35 (1.17 – 1.54)‡ | 1.38 (1.18 – 1.60)‡ | 0.01 (-0.19 – 0.21)    |  |
|                    | 2nd             | 67.3 (57.0 – 78.6)                                         | 77.7 (66.9 – 89.0)    | 50.8 (41.8 – 61.1)   | 16.4 (3.4 – 30.0)§         | 24.4% (5.7 – 40.2)§          | 1.17 (1.05 – 1.29)‡                                      | 1.16 (1.04 – 1.28)‡ | 1.17 (1.04 – 1.30)‡ | 0.00 (-0.14 – 0.15)    |  |
|                    | 3rd             | 58.4 (50.6 – 67.4)                                         | 68.5 (60.0 – 77.1)    | 43.7 (36.5 – 51.6)   | 14.7 (4.6 – 25.3)§         | 25.2% (8.6 – 39.5)§          | 1.02 (0.94 – 1.09)                                       | 1.03 (0.95 – 1.10)  | 1.01 (0.93 – 1.09)  | -0.01 (-0.08 – 0.07)   |  |
|                    | 4th             | 48.9 (41.0 – 58.2)                                         | 57.7 (48.5 – 67.4)    | 36.5 (29.5 – 44.5)   | 12.5 (2.5 – 22.7)§         | 25.5% (5.7 – 41.4)§          | 0.85 (0.74 – 0.97)‡                                      | 0.87 (0.76 – 0.98)‡ | 0.84 (0.73 – 0.96)‡ | -0.01 (-0.14 – 0.12)   |  |
|                    | 5th             | 33.7 (25.2 – 44.5)                                         | 39.6 (29.7 – 51.5)    | 25.7 (18.3 – 34.7)   | 8.0 (0.3 – 16.3)§          | 23.9% (0.9 – 41.8)§          | 0.59 (0.45 – 0.75)‡                                      | 0.59 (0.45 – 0.76)‡ | 0.59 (0.45 – 0.77)‡ | 0.01 (-0.10 – 0.12)    |  |
| South Sudan        | 1st             | 251.6 (194.2 – 317.6)                                      | 180.6 (143.6 – 224.6) | 98.6 (59.5 – 160.3)  | 153.0 (71.5 – 226.4)§      | 60.8% (32.8 – 77.1)§         | 0.98 (0.82 – 1.16)                                       | 0.98 (0.82 – 1.15)  | 1.09 (0.92 – 1.27)  | 0.11 (-0.06 – 0.27)    |  |
|                    | 2nd             | 276.3 (221.3 – 334.1)                                      | 197.7 (162.6 – 238.6) | 98.1 (59.3 – 157.4)  | 178.1 (98.2 – 249.9)§      | 64.5% (39.9 – 79.2)§         | 1.08 (0.95 – 1.20)                                       | 1.07 (0.95 – 1.19)  | 1.08 (0.96 – 1.20)  | 0.00 (-0.13 – 0.14)    |  |
|                    | 3rd             | 259.4 (210.6 – 308.2)                                      | 185.6 (154.7 – 220.5) | 90.7 (54.9 – 145.6)  | 168.6 (96.0 – 231.2)§      | 65.0% (41.1 – 79.4)§         | 1.01 (0.93 – 1.09)                                       | 1.01 (0.93 – 1.08)  | 1.00 (0.92 – 1.08)  | -0.01 (-0.08 – 0.06)   |  |
|                    | 4th             | 247.0 (196.2 – 302.1)                                      | 175.4 (142.9 – 213.3) | 77.5 (46.5 – 124.6)  | 169.4 (99.3 – 232.7)§      | 68.6% (46.1 – 81.6)§         | 0.96 (0.84 – 1.09)                                       | 0.95 (0.83 – 1.07)  | 0.85 (0.75 – 0.97)‡ | -0.11 (-0.24 – 0.03)   |  |
|                    | 5th             | 247.8 (186.4 – 322.6)                                      | 182.7 (142.6 – 235.2) | 88.5 (52.5 – 145.0)  | 159.3 (81.7 – 237.6)§      | 64.3% (38.8 – 79.7)§         | 0.97 (0.78 – 1.19)                                       | 0.99 (0.82 – 1.20)  | 0.98 (0.80 – 1.18)  | 0.01 (-0.16 – 0.18)    |  |
| State of Palestine | 1st             | 57.6 (47.3 – 68.7)                                         | 39.1 (32.2 – 46.8)    | 26.2 (18.0 – 38.3)   | 31.4 (17.2 – 43.8)§        | 54.5% (32.7 – 68.8)§         | 1.29 (1.08 – 1.51)‡                                      | 1.31 (1.10 – 1.53)‡ | 1.35 (1.12 – 1.59)‡ | 0.06 (-0.16 – 0.28)    |  |
|                    | 2nd             | 52.7 (45.4 – 60.2)                                         | 35.0 (30.2 – 40.2)    | 22.6 (16.0 – 32.4)   | 30.1 (18.3 – 40.1)§        | 57.2% (37.3 – 70.4)§         | 1.18 (1.05 – 1.32)‡                                      | 1.17 (1.04 – 1.31)‡ | 1.16 (1.02 – 1.31)‡ | -0.02 (-0.18 – 0.14)   |  |
|                    | 3rd             | 45.6 (40.4 – 50.9)                                         | 30.4 (26.8 – 34.1)    | 19.7 (13.9 – 27.8)   | 25.9 (16.5 – 33.7)§        | 56.9% (38.0 – 69.9)§         | 1.02 (0.94 – 1.10)                                       | 1.02 (0.93 – 1.10)  | 1.01 (0.92 – 1.10)  | -0.01 (-0.10 – 0.08)   |  |
|                    | 4th             | 38.3 (32.4 – 44.8)                                         | 25.6 (21.6 – 30.0)    | 16.0 (11.1 – 23.5)   | 22.3 (13.3 – 30.1)§        | 58.2% (37.5 – 71.7)§         | 0.86 (0.74 – 0.98)‡                                      | 0.86 (0.74 – 0.98)‡ | 0.82 (0.69 – 0.96)‡ | -0.03 (-0.18 – 0.12)   |  |
|                    | 5th             | 28.9 (21.5 – 37.7)                                         | 19.4 (14.5 – 25.1)    | 12.6 (8.1 – 19.3)    | 16.3 (8.7 – 23.9)§         | 56.4% (34.9 – 70.9)§         | 0.65 (0.49 – 0.84)‡                                      | 0.65 (0.50 – 0.83)‡ | 0.65 (0.49 – 0.84)‡ | 0.00 (-0.12 – 0.13)    |  |
| Sudan              | 1st             | 145.2 (122.4 – 170.2)                                      | 118.3 (100.5 – 137.6) | 77.0 (59.8 – 98.3)   | 68.2 (40.4 – 96.0)§        | 47.0% (30.6 – 59.8)§         | 1.11 (0.95 – 1.27)                                       | 1.13 (0.98 – 1.28)  | 1.18 (1.04 – 1.33)‡ | 0.08 (-0.10 – 0.25)    |  |
|                    | 2nd             | 153.4 (134.6 – 173.5)                                      | 123.5 (109.0 – 139.5) | 78.5 (61.9 – 98.9)   | 74.9 (48.7 – 99.9)§        | 48.8% (34.2 – 60.5)§         | 1.17 (1.05 – 1.29)‡                                      | 1.18 (1.07 – 1.29)‡ | 1.21 (1.10 – 1.32)‡ | 0.04 (-0.11 – 0.19)    |  |
|                    | 3rd             | 142.2 (128.3 – 156.6)                                      | 113.5 (102.1 – 125.9) | 68.8 (55.0 – 85.1)   | 73.4 (52.9 – 92.2)§        | 51.6% (39.5 – 61.8)§         | 1.08 (1.01 – 1.15)‡                                      | 1.08 (1.01 – 1.15)‡ | 1.06 (0.99 – 1.12)  | -0.03 (-0.10 – 0.05)   |  |
|                    | 4th             | 126.7 (109.6 – 145.9)                                      | 97.1 (84.2 – 111.7)   | 58.6 (46.0 – 74.3)   | 68.1 (46.4 – 89.4)§        | 53.7% (40.0 – 64.5)§         | 0.96 (0.85 – 1.08)                                       | 0.93 (0.83 – 1.04)  | 0.90 (0.81 – 1.00)  | -0.06 (-0.19 – 0.07)   |  |
|                    | 5th             | 89.4 (71.8 – 109.6)                                        | 71.1 (58.4 – 85.6)    | 42.5 (32.1 – 55.2)   | 46.9 (27.9 – 66.8)§        | 52.5% (36.4 – 64.6)§         | 0.68 (0.56 – 0.83)‡                                      | 0.68 (0.57 – 0.81)‡ | 0.65 (0.55 – 0.77)‡ | -0.03 (-0.16 – 0.09)   |  |
| Suriname           | 1st             | 64.1 (49.2 – 82.1)                                         | 47.2 (34.2 – 64.5)    | 28.6 (13.6 – 59.4)   | 35.5 (3.9 – 57.3)§         | 55.4% (6.8 – 79.1)§          | 1.38 (1.18 – 1.61)‡                                      | 1.41 (1.20 – 1.63)‡ | 1.43 (1.20 – 1.68)‡ | 0.05 (-0.18 – 0.27)    |  |
|                    | 2nd             | 53.8 (42.1 – 66.8)                                         | 38.4 (28.3 – 52.1)    | 22.8 (11.0 – 47.3)   | 31.0 (5.3 – 47.8)§         | 57.6% (10.4 – 79.6)§         | 1.16 (1.03 – 1.29)‡                                      | 1.15 (1.01 – 1.28)‡ | 1.14 (1.00 – 1.29)  | -0.02 (-0.18 – 0.14)   |  |
|                    | 3rd             | 46.7 (37.2 – 57.6)                                         | 33.4 (25.0 – 44.8)    | 19.9 (9.6 – 41.2)    | 26.8 (5.1 – 40.9)§         | 57.3% (11.4 – 79.6)§         | 1.01 (0.92 – 1.09)                                       | 1.00 (0.91 – 1.08)  | 1.00 (0.90 – 1.09)  | -0.01 (-0.10 – 0.08)   |  |
|                    | 4th             | 39.0 (30.5 – 49.4)                                         | 28.1 (20.6 – 38.1)    | 16.2 (7.7 – 33.8)    | 22.8 (4.8 – 35.7)§         | 58.4% (12.9 – 80.7)§         | 0.84 (0.73 – 0.96)‡                                      | 0.84 (0.72 – 0.96)‡ | 0.81 (0.68 – 0.95)‡ | -0.03 (-0.18 – 0.11)   |  |
|                    | 5th             | 28.4 (19.9 – 40.1)                                         | 20.4 (13.6 – 30.5)    | 12.5 (5.6 – 26.8)    | 16.0 (2.2 – 27.3)§         | 56.2% (8.7 – 79.6)§          | 0.61 (0.46 – 0.81)‡                                      | 0.61 (0.45 – 0.81)‡ | 0.62 (0.46 – 0.82)‡ | 0.01 (-0.11 – 0.13)    |  |

Continued on next page

‡: Ratio is significantly different from one.

§: Change/decline is significantly different from zero.

Absolute decline: wealth quintile-specific U5MR (1990) - wealth quintile-specific U5MR (2016).

Percentage decline: absolute decline over wealth quintile-specific U5MR (1990) × 100.

Change in ratio: ratio (2016) - ratio (1990).

Table 8 – continued from previous page

|                                           | Wealth Quintile | wealth quintile-specific U5MR (deaths per 1000 livebirths) |                       |                     |                            |                              | Ratio of wealth quintile-specific to national-level U5MR |                     |                     |                      |  |
|-------------------------------------------|-----------------|------------------------------------------------------------|-----------------------|---------------------|----------------------------|------------------------------|----------------------------------------------------------|---------------------|---------------------|----------------------|--|
|                                           |                 | 1990                                                       | 2000                  | 2016                | Absolute decline 1990–2016 | Percentage decline 1990–2016 | 1990                                                     | 2000                | 2016                | Change 1990–2016     |  |
| Swaziland                                 | 1st             | 83.4 (69.5 – 99.4)                                         | 141.4 (121.1 – 163.4) | 89.3 (59.7 – 130.7) | -6.0 (-47.5 – 25.2)        | -7.2% (-58.9 – 28.5)         | 1.27 (1.11 – 1.44)‡                                      | 1.20 (1.07 – 1.34)‡ | 1.27 (1.12 – 1.43)‡ | 0.00 (-0.18 – 0.18)  |  |
|                                           | 2nd             | 72.3 (61.2 – 84.7)                                         | 122.8 (106.8 – 139.4) | 75.9 (51.2 – 109.9) | -3.6 (-38.8 – 22.0)        | -5.0% (-56.0 – 29.3)         | 1.10 (0.99 – 1.21)                                       | 1.05 (0.95 – 1.14)  | 1.08 (0.97 – 1.19)  | -0.02 (-0.15 – 0.11) |  |
|                                           | 3rd             | 65.4 (56.6 – 75.2)                                         | 119.1 (105.4 – 134.3) | 69.9 (47.2 – 101.7) | -4.5 (-36.3 – 18.4)        | -6.9% (-57.2 – 27.2)         | 0.99 (0.92 – 1.06)                                       | 1.01 (0.95 – 1.08)  | 0.99 (0.92 – 1.06)  | 0.00 (-0.07 – 0.07)  |  |
|                                           | 4th             | 57.5 (48.1 – 68.1)                                         | 109.9 (95.3 – 127.4)  | 62.5 (42.1 – 92.2)  | -5.0 (-35.4 – 16.5)        | -8.7% (-63.3 – 27.3)         | 0.87 (0.77 – 0.98)‡                                      | 0.94 (0.84 – 1.04)  | 0.89 (0.79 – 1.00)  | 0.01 (-0.11 – 0.14)  |  |
|                                           | 5th             | 50.4 (40.6 – 61.7)                                         | 94.2 (79.1 – 111.5)   | 54.3 (35.9 – 80.0)  | -3.9 (-29.6 – 15.4)        | -7.7% (-63.0 – 29.2)         | 0.77 (0.64 – 0.90)‡                                      | 0.80 (0.69 – 0.92)‡ | 0.77 (0.65 – 0.90)‡ | 0.01 (-0.13 – 0.14)  |  |
| Syrian Arab Republic                      | 1st             | 46.6 (38.2 – 55.6)                                         | 30.1 (24.8 – 35.6)    | 22.7 (16.5 – 33.0)  | 24.0 (11.2 – 33.8)§        | 51.4% (26.5 – 65.0)§         | 1.26 (1.05 – 1.47)‡                                      | 1.28 (1.07 – 1.48)‡ | 1.30 (1.07 – 1.53)‡ | 0.04 (-0.09 – 0.38)  |  |
|                                           | 2nd             | 43.6 (37.6 – 50.0)                                         | 27.5 (23.6 – 31.4)    | 20.1 (15.0 – 28.9)  | 23.5 (12.7 – 31.5)§        | 53.9% (31.6 – 66.2)§         | 1.18 (1.04 – 1.31)‡                                      | 1.16 (1.03 – 1.30)‡ | 1.15 (1.00 – 1.31)  | -0.03 (-0.11 – 0.24) |  |
|                                           | 3rd             | 37.7 (33.3 – 42.1)                                         | 23.9 (21.1 – 26.7)    | 17.6 (13.2 – 25.2)  | 20.0 (11.1 – 26.0)§        | 53.2% (31.3 – 65.0)§         | 1.02 (0.93 – 1.09)                                       | 1.01 (0.92 – 1.10)  | 1.01 (0.90 – 1.10)  | -0.01 (-0.02 – 0.17) |  |
|                                           | 4th             | 31.8 (26.8 – 37.0)                                         | 19.9 (16.8 – 23.3)    | 14.4 (10.4 – 21.1)  | 17.3 (9.2 – 23.5)§         | 54.5% (31.8 – 67.6)§         | 0.86 (0.74 – 0.98)‡                                      | 0.84 (0.73 – 0.97)‡ | 0.83 (0.68 – 0.97)‡ | -0.03 (-0.13 – 0.20) |  |
|                                           | 5th             | 25.8 (19.3 – 34.0)                                         | 16.6 (12.5 – 21.9)    | 12.6 (8.5 – 19.6)   | 13.2 (5.9 – 20.0)§         | 51.0% (25.5 – 65.3)§         | 0.70 (0.53 – 0.91)‡                                      | 0.70 (0.54 – 0.91)‡ | 0.72 (0.54 – 0.95)‡ | 0.03 (-0.06 – 0.24)  |  |
| Tajikistan                                | 1st             | 124.2 (103.9 – 147.0)                                      | 107.8 (89.3 – 130.4)  | 54.0 (32.0 – 92.1)  | 70.3 (29.8 – 99.2)§        | 56.6% (25.0 – 74.2)§         | 1.16 (1.02 – 1.31)‡                                      | 1.16 (1.03 – 1.30)‡ | 1.25 (1.08 – 1.43)‡ | 0.09 (-0.09 – 0.28)  |  |
|                                           | 2nd             | 118.4 (101.7 – 136.9)                                      | 103.7 (87.1 – 123.6)  | 49.8 (29.6 – 85.1)  | 68.6 (31.5 – 93.7)§        | 58.0% (27.8 – 74.8)§         | 1.11 (1.00 – 1.22)‡                                      | 1.12 (1.01 – 1.22)‡ | 1.15 (1.03 – 1.28)‡ | 0.05 (-0.09 – 0.19)  |  |
|                                           | 3rd             | 111.2 (97.2 – 126.5)                                       | 96.1 (81.9 – 113.0)   | 42.9 (25.9 – 73.2)  | 68.3 (37.4 – 89.4)§        | 61.4% (34.4 – 76.6)§         | 1.04 (0.97 – 1.11)                                       | 1.04 (0.97 – 1.10)  | 1.00 (0.92 – 1.07)  | -0.04 (-0.12 – 0.03) |  |
|                                           | 4th             | 93.7 (79.3 – 109.9)                                        | 79.2 (65.9 – 95.2)    | 35.2 (21.0 – 61.2)  | 58.5 (31.0 – 78.5)§        | 62.4% (34.7 – 77.6)§         | 0.87 (0.78 – 0.98)‡                                      | 0.85 (0.76 – 0.95)‡ | 0.82 (0.71 – 0.93)‡ | -0.06 (-0.18 – 0.07) |  |
|                                           | 5th             | 88.0 (71.1 – 107.9)                                        | 76.8 (61.7 – 95.1)    | 33.6 (19.5 – 59.1)  | 54.4 (26.6 – 75.9)§        | 61.8% (32.2 – 77.5)§         | 0.82 (0.68 – 0.98)‡                                      | 0.83 (0.70 – 0.97)‡ | 0.78 (0.64 – 0.94)‡ | -0.04 (-0.18 – 0.10) |  |
| Thailand                                  | 1st             | 48.8 (40.4 – 57.7)                                         | 30.4 (24.2 – 37.0)    | 16.5 (9.7 – 28.1)   | 32.3 (19.3 – 42.5)§        | 66.2% (41.9 – 80.1)§         | 1.29 (1.08 – 1.51)‡                                      | 1.32 (1.09 – 1.54)‡ | 1.35 (1.11 – 1.63)‡ | 0.06 (-0.16 – 0.31)  |  |
|                                           | 2nd             | 44.8 (38.9 – 50.9)                                         | 27.2 (22.7 – 32.0)    | 14.2 (8.5 – 24.0)   | 30.5 (19.8 – 38.5)§        | 68.2% (46.3 – 80.9)§         | 1.18 (1.05 – 1.33)‡                                      | 1.18 (1.04 – 1.32)‡ | 1.17 (1.01 – 1.33)‡ | -0.02 (-0.19 – 0.16) |  |
|                                           | 3rd             | 38.4 (34.2 – 42.4)                                         | 23.3 (19.7 – 26.8)    | 12.3 (7.4 – 20.5)   | 26.1 (17.3 – 32.1)§        | 67.9% (46.1 – 80.6)§         | 1.01 (0.93 – 1.10)                                       | 1.01 (0.91 – 1.10)  | 1.01 (0.90 – 1.11)  | -0.01 (-0.10 – 0.08) |  |
|                                           | 4th             | 32.2 (27.3 – 37.4)                                         | 19.2 (15.7 – 23.2)    | 9.9 (5.8 – 17.0)    | 22.3 (14.3 – 28.6)§        | 69.4% (47.4 – 82.2)§         | 0.85 (0.74 – 0.98)‡                                      | 0.83 (0.71 – 0.96)‡ | 0.81 (0.66 – 0.96)‡ | -0.04 (-0.21 – 0.11) |  |
|                                           | 5th             | 24.9 (18.3 – 33.3)                                         | 15.3 (11.0 – 20.6)    | 8.1 (4.5 – 14.4)    | 16.8 (9.4 – 24.2)§         | 67.5% (43.9 – 80.9)§         | 0.66 (0.49 – 0.87)‡                                      | 0.66 (0.49 – 0.88)‡ | 0.66 (0.48 – 0.88)‡ | 0.01 (-0.13 – 0.14)  |  |
| The former Yugoslav Republic of Macedonia | 1st             | 50.1 (41.7 – 58.5)                                         | 22.7 (18.8 – 27.1)    | 17.2 (11.9 – 28.1)  | 32.9 (19.9 – 41.9)§        | 65.7% (43.3 – 76.1)§         | 1.35 (1.13 – 1.58)‡                                      | 1.42 (1.18 – 1.68)‡ | 1.41 (1.16 – 1.67)‡ | 0.06 (-0.17 – 0.30)  |  |
|                                           | 2nd             | 42.9 (37.7 – 48.1)                                         | 18.2 (15.7 – 21.0)    | 13.9 (9.9 – 22.6)   | 29.0 (18.9 – 35.1)§        | 67.5% (46.3 – 76.9)§         | 1.16 (1.02 – 1.30)‡                                      | 1.14 (0.98 – 1.30)  | 1.14 (0.98 – 1.31)  | -0.02 (-0.19 – 0.16) |  |
|                                           | 3rd             | 37.0 (33.6 – 40.4)                                         | 15.8 (14.1 – 17.6)    | 12.1 (8.7 – 19.5)   | 24.9 (16.5 – 29.4)§        | 67.3% (46.5 – 76.3)§         | 1.00 (0.91 – 1.08)                                       | 0.99 (0.89 – 1.09)  | 0.99 (0.89 – 1.10)  | -0.01 (-0.10 – 0.08) |  |
|                                           | 4th             | 30.8 (26.4 – 35.2)                                         | 12.6 (10.3 – 15.0)    | 9.7 (6.7 – 15.9)    | 21.1 (13.8 – 26.2)§        | 68.6% (47.4 – 78.5)§         | 0.83 (0.71 – 0.95)‡                                      | 0.79 (0.64 – 0.93)‡ | 0.79 (0.64 – 0.94)‡ | -0.04 (-0.20 – 0.11) |  |
|                                           | 5th             | 24.6 (18.3 – 32.4)                                         | 10.7 (7.8 – 14.2)     | 8.1 (5.2 – 13.9)    | 16.5 (9.3 – 23.2)§         | 67.0% (44.3 – 77.4)§         | 0.66 (0.49 – 0.87)‡                                      | 0.67 (0.49 – 0.88)‡ | 0.67 (0.49 – 0.88)‡ | 0.00 (-0.13 – 0.14)  |  |
| Timor-Leste                               | 1st             | 186.4 (152.7 – 223.4)                                      | 124.3 (103.5 – 147.4) | 61.0 (39.4 – 94.6)  | 125.4 (82.1 – 165.4)§      | 67.3% (49.0 – 78.9)§         | 1.06 (0.90 – 1.24)                                       | 1.14 (0.97 – 1.31)  | 1.23 (1.04 – 1.42)‡ | 0.16 (-0.02 – 0.34)  |  |
|                                           | 2nd             | 203.2 (175.2 – 232.6)                                      | 126.8 (110.4 – 145.1) | 59.8 (39.1 – 91.2)  | 143.3 (103.7 – 177.9)§     | 70.5% (54.5 – 80.8)§         | 1.16 (1.04 – 1.28)‡                                      | 1.17 (1.05 – 1.29)‡ | 1.20 (1.08 – 1.33)‡ | 0.04 (-0.10 – 0.19)  |  |
|                                           | 3rd             | 189.6 (167.4 – 213.3)                                      | 117.9 (105.0 – 132.2) | 51.9 (34.3 – 78.0)  | 137.7 (104.2 – 166.6)§     | 72.6% (58.2 – 82.0)§         | 1.08 (1.00 – 1.16)‡                                      | 1.08 (1.01 – 1.16)‡ | 1.04 (0.96 – 1.12)  | -0.04 (-0.12 – 0.04) |  |
|                                           | 4th             | 177.5 (150.9 – 206.6)                                      | 101.2 (86.8 – 117.7)  | 43.6 (28.3 – 66.6)  | 133.9 (100.7 – 165.2)§     | 75.4% (61.7 – 84.1)§         | 1.01 (0.90 – 1.14)                                       | 0.93 (0.82 – 1.05)  | 0.88 (0.76 – 0.99)‡ | -0.14 (-0.28 – 0.00) |  |
|                                           | 5th             | 118.8 (91.7 – 151.7)                                       | 73.3 (57.3 – 93.6)    | 32.2 (20.3 – 51.3)  | 86.6 (58.1 – 116.7)§       | 72.9% (57.2 – 82.8)§         | 0.68 (0.53 – 0.85)‡                                      | 0.67 (0.53 – 0.84)‡ | 0.65 (0.51 – 0.81)‡ | -0.03 (-0.16 – 0.09) |  |
| Togo                                      | 1st             | 170.1 (149.6 – 192.8)                                      | 149.7 (132.9 – 167.6) | 99.0 (77.1 – 125.7) | 71.0 (38.9 – 100.5)§       | 41.8% (24.3 – 55.1)§         | 1.17 (1.06 – 1.30)‡                                      | 1.25 (1.15 – 1.36)‡ | 1.31 (1.17 – 1.46)‡ | 0.13 (-0.03 – 0.31)  |  |
|                                           | 2nd             | 170.4 (152.2 – 189.8)                                      | 141.5 (126.5 – 157.1) | 91.2 (71.9 – 114.7) | 79.2 (51.8 – 105.1)§       | 46.5% (32.1 – 58.2)§         | 1.18 (1.08 – 1.28)‡                                      | 1.19 (1.10 – 1.27)‡ | 1.20 (1.10 – 1.31)‡ | 0.03 (-0.11 – 0.16)  |  |
|                                           | 3rd             | 158.7 (144.3 – 174.0)                                      | 131.1 (118.9 – 143.5) | 81.4 (64.5 – 101.3) | 77.3 (55.3 – 97.6)§        | 48.7% (35.8 – 59.3)§         | 1.10 (1.03 – 1.16)‡                                      | 1.10 (1.04 – 1.16)‡ | 1.07 (1.01 – 1.14)‡ | -0.02 (-0.10 – 0.05) |  |
|                                           | 4th             | 139.6 (123.2 – 157.0)                                      | 106.9 (94.8 – 120.0)  | 66.0 (51.3 – 83.9)  | 73.6 (51.1 – 94.7)§        | 52.7% (38.8 – 63.6)§         | 0.96 (0.87 – 1.06)                                       | 0.90 (0.82 – 0.98)‡ | 0.87 (0.77 – 0.97)‡ | -0.09 (-0.22 – 0.03) |  |
|                                           | 5th             | 85.2 (72.1 – 99.7)                                         | 67.4 (57.7 – 78.4)    | 40.9 (31.0 – 53.1)  | 44.3 (28.5 – 59.9)§        | 52.0% (36.6 – 64.0)§         | 0.59 (0.51 – 0.68)‡                                      | 0.56 (0.50 – 0.64)‡ | 0.54 (0.46 – 0.64)‡ | -0.05 (-0.15 – 0.05) |  |
| Tunisia                                   | 1st             | 73.6 (58.9 – 90.2)                                         | 42.5 (33.2 – 52.7)    | 19.0 (12.9 – 27.5)  | 54.6 (38.5 – 71.6)§        | 74.2% (61.2 – 82.8)§         | 1.30 (1.08 – 1.52)‡                                      | 1.34 (1.12 – 1.58)‡ | 1.40 (1.15 – 1.66)‡ | 0.10 (-0.13 – 0.34)  |  |
|                                           | 2nd             | 66.2 (55.3 – 77.9)                                         | 36.7 (30.0 – 44.0)    | 15.6 (10.8 – 22.3)  | 50.6 (38.1 – 63.4)§        | 76.5% (65.2 – 84.2)§         | 1.17 (1.03 – 1.30)‡                                      | 1.16 (1.02 – 1.30)‡ | 1.15 (0.99 – 1.31)  | -0.02 (-0.19 – 0.15) |  |
|                                           | 3rd             | 58.1 (49.6 – 67.5)                                         | 31.9 (26.5 – 37.8)    | 13.6 (9.6 – 19.1)   | 44.5 (34.2 – 54.8)§        | 76.6% (65.9 – 84.1)§         | 1.02 (0.94 – 1.11)                                       | 1.01 (0.92 – 1.09)  | 1.00 (0.90 – 1.10)  | -0.02 (-0.11 – 0.07) |  |
|                                           | 4th             | 48.9 (40.1 – 59.0)                                         | 26.7 (21.5 – 32.9)    | 10.9 (7.4 – 15.7)   | 38.0 (28.1 – 48.5)§        | 77.7% (66.5 – 85.6)§         | 0.86 (0.75 – 0.98)‡                                      | 0.84 (0.72 – 0.97)‡ | 0.80 (0.65 – 0.95)‡ | -0.06 (-0.22 – 0.10) |  |
|                                           | 5th             | 37.2 (26.8 – 51.0)                                         | 20.7 (14.8 – 28.5)    | 8.9 (5.7 – 13.6)    | 28.3 (18.6 – 40.4)§        | 76.1% (63.9 – 84.3)§         | 0.65 (0.49 – 0.87)‡                                      | 0.65 (0.48 – 0.87)‡ | 0.65 (0.48 – 0.88)‡ | 0.00 (-0.13 – 0.13)  |  |
| Turkey                                    | 1st             | 109.4 (96.7 – 123.8)                                       | 59.8 (52.5 – 68.0)    | 19.6 (16.6 – 22.9)  | 89.8 (77.4 – 103.6)§       | 82.0% (78.6 – 85.0)§         | 1.47 (1.32 – 1.64)‡                                      | 1.53 (1.36 – 1.70)‡ | 1.55 (1.31 – 1.80)‡ | 0.07 (-0.17 – 0.32)  |  |
|                                           | 2nd             | 84.0 (74.6 – 93.9)                                         | 45.6 (40.5 – 51.2)    | 14.5 (12.6 – 16.5)  | 69.5 (60.2 – 79.4)§        | 82.7% (79.7 – 85.4)§         | 1.13 (1.03 – 1.24)‡                                      | 1.16 (1.05 – 1.27)‡ | 1.15 (1.00 – 1.30)  | 0.01 (-0.15 – 0.18)  |  |
|                                           | 3rd             | 75.3 (68.4 – 82.5)                                         | 38.6 (34.9 – 42.6)    | 12.6 (11.2 – 13.8)  | 62.7 (56.1 – 69.9)§        | 83.3% (81.3 – 85.3)§         | 1.01 (0.94 – 1.08)                                       | 0.98 (0.91 – 1.06)  | 0.99 (0.89 – 1.08)  | -0.03 (-0.13 – 0.07) |  |
|                                           | 4th             | 62.9 (55.1 – 71.6)                                         | 31.6 (27.4 – 36.4)    | 9.9 (8.1 – 11.8)    | 53.0 (45.2 – 61.5)§        | 84.2% (80.8 – 87.3)§         | 0.85 (0.75 – 0.95)‡                                      | 0.81 (0.71 – 0.91)‡ | 0.78 (0.64 – 0.92)‡ | -0.07 (-0.22 – 0.09) |  |
|                                           | 5th             | 39.4 (31.3 – 49.0)                                         | 20.4 (16.1 – 25.4)    | 6.8 (5.3 – 8.8)     | 32.5 (25.3 – 41.1)§        | 82.6% (78.3 – 86.0)§         | 0.53 (0.43 – 0.65)‡                                      | 0.52 (0.41 – 0.64)‡ | 0.54 (0.41 – 0.69)‡ | 0.01 (-0.10 – 0.13)  |  |

Continued on next page

‡: Ratio is significantly different from one.

§: Change/decline is significantly different from zero.

Absolute decline: wealth quintile-specific U5MR (1990) - wealth quintile-specific U5MR (2016).

Percentage decline: absolute decline over wealth quintile-specific U5MR (1990) × 100.

Change in ratio: ratio (2016) - ratio (1990).

Table 8 – continued from previous page

|                             | Wealth Quintile | wealth quintile-specific U5MR (deaths per 1000 livebirths) |                       |                     |                            |                              | Ratio of wealth quintile-specific to national-level U5MR |                     |                     |                        |  |
|-----------------------------|-----------------|------------------------------------------------------------|-----------------------|---------------------|----------------------------|------------------------------|----------------------------------------------------------|---------------------|---------------------|------------------------|--|
|                             |                 | 1990                                                       | 2000                  | 2016                | Absolute decline 1990–2016 | Percentage decline 1990–2016 | 1990                                                     | 2000                | 2016                | Change 1990–2016       |  |
| Turkmenistan                | 1st             | 109.4 (87.2 – 135.9)                                       | 106.3 (81.8 – 138.3)  | 68.6 (28.7 – 147.5) | 40.8 (-37.4 – 84.5)        | 37.3% (-35.2 – 73.3)         | 1.27 (1.07 – 1.49)‡                                      | 1.28 (1.08 – 1.51)‡ | 1.34 (1.14 – 1.57)‡ | 0.08 (-0.11 – 0.27)    |  |
|                             | 2nd             | 97.5 (80.3 – 116.7)                                        | 94.0 (74.2 – 118.6)   | 58.7 (24.7 – 125.1) | 38.8 (-27.6 – 75.4)        | 39.8% (-28.6 – 74.2)         | 1.13 (1.01 – 1.25)‡                                      | 1.13 (1.00 – 1.26)‡ | 1.15 (1.02 – 1.28)‡ | 0.02 (-0.13 – 0.16)    |  |
|                             | 3rd             | 89.6 (75.6 – 105.5)                                        | 86.1 (69.0 – 107.4)   | 51.5 (21.8 – 108.3) | 38.1 (-19.5 – 69.7)        | 42.6% (-22.3 – 75.3)         | 1.04 (0.95 – 1.12)                                       | 1.04 (0.95 – 1.11)  | 1.01 (0.92 – 1.09)  | -0.03 (-0.11 – 0.04)   |  |
|                             | 4th             | 75.6 (61.6 – 92.0)                                         | 72.3 (56.6 – 91.6)    | 42.4 (17.8 – 89.9)  | 33.3 (-14.5 – 60.8)        | 44.0% (-19.6 – 76.6)         | 0.88 (0.76 – 1.00)‡                                      | 0.87 (0.75 – 0.99)‡ | 0.83 (0.72 – 0.94)‡ | -0.05 (-0.18 – 0.08)   |  |
|                             | 5th             | 59.3 (42.7 – 79.4)                                         | 56.7 (40.2 – 78.9)    | 33.9 (13.8 – 74.0)  | 25.4 (-12.5 – 50.5)        | 42.9% (-22.9 – 75.8)         | 0.69 (0.52 – 0.89)‡                                      | 0.68 (0.52 – 0.89)‡ | 0.66 (0.50 – 0.86)‡ | -0.02 (-0.15 – 0.11)   |  |
| Uganda                      | 1st             | 196.1 (175.2 – 218.3)                                      | 188.2 (169.9 – 208.0) | 67.4 (54.6 – 82.4)  | 128.6 (104.7 – 153.1)§     | 65.6% (57.2 – 72.6)§         | 1.12 (1.02 – 1.23)‡                                      | 1.11 (1.02 – 1.20)‡ | 1.27 (1.12 – 1.43)‡ | 0.15 (-0.02 – 0.32)    |  |
|                             | 2nd             | 186.6 (168.9 – 205.5)                                      | 180.1 (163.7 – 197.0) | 60.0 (49.3 – 72.2)  | 126.6 (105.9 – 147.7)§     | 67.8% (60.4 – 74.0)§         | 1.07 (0.98 – 1.15)                                       | 1.06 (0.98 – 1.14)  | 1.13 (1.02 – 1.24)‡ | 0.07 (-0.07 – 0.20)    |  |
|                             | 3rd             | 178.0 (164.1 – 193.3)                                      | 171.7 (158.1 – 185.6) | 52.1 (43.2 – 61.9)  | 125.8 (110.0 – 142.1)§     | 70.7% (64.9 – 75.9)§         | 1.02 (0.96 – 1.07)                                       | 1.01 (0.95 – 1.06)  | 0.98 (0.92 – 1.05)  | -0.03 (-0.11 – 0.04)   |  |
|                             | 4th             | 181.1 (162.8 – 201.9)                                      | 178.2 (161.2 – 195.8) | 46.8 (37.9 – 57.0)  | 134.4 (113.9 – 156.0)§     | 74.2% (68.0 – 79.5)§         | 1.03 (0.95 – 1.13)                                       | 1.05 (0.97 – 1.13)  | 0.88 (0.78 – 0.99)‡ | -0.15 (-0.28 – -0.02)§ |  |
|                             | 5th             | 133.3 (117.5 – 150.8)                                      | 132.4 (118.4 – 147.8) | 38.7 (30.7 – 47.9)  | 94.6 (77.2 – 112.7)§       | 71.0% (63.2 – 77.3)§         | 0.76 (0.68 – 0.85)‡                                      | 0.78 (0.71 – 0.85)‡ | 0.73 (0.62 – 0.84)‡ | -0.03 (-0.16 – 0.10)   |  |
| Ukraine                     | 1st             | 26.2 (21.1 – 32.6)                                         | 24.8 (20.0 – 30.2)    | 12.4 (10.1 – 15.0)  | 13.8 (9.6 – 19.1)§         | 52.6% (43.0 – 61.2)§         | 1.35 (1.11 – 1.60)‡                                      | 1.35 (1.12 – 1.60)‡ | 1.36 (1.12 – 1.64)‡ | 0.01 (-0.18 – 0.21)    |  |
|                             | 2nd             | 22.4 (18.8 – 26.9)                                         | 21.1 (17.9 – 24.7)    | 10.5 (9.0 – 12.1)   | 11.8 (8.7 – 16.0)§         | 52.9% (44.5 – 61.1)§         | 1.15 (1.00 – 1.31)‡                                      | 1.15 (1.00 – 1.31)‡ | 1.16 (1.00 – 1.32)  | 0.00 (-0.14 – 0.14)    |  |
|                             | 3rd             | 19.5 (16.9 – 22.9)                                         | 18.4 (16.1 – 21.1)    | 9.1 (8.1 – 10.2)    | 10.4 (8.0 – 13.5)§         | 53.2% (46.4 – 60.1)§         | 1.01 (0.91 – 1.11)                                       | 1.01 (0.91 – 1.10)  | 1.00 (0.90 – 1.11)  | 0.00 (-0.07 – 0.07)    |  |
|                             | 4th             | 15.9 (12.9 – 19.5)                                         | 15.0 (12.1 – 18.2)    | 7.4 (5.9 – 8.8)     | 8.5 (6.0 – 11.8)§          | 53.7% (44.3 – 62.5)§         | 0.82 (0.68 – 0.96)‡                                      | 0.82 (0.68 – 0.96)‡ | 0.81 (0.66 – 0.96)‡ | -0.01 (-0.13 – 0.11)   |  |
|                             | 5th             | 13.0 (9.4 – 17.8)                                          | 12.3 (9.0 – 16.6)     | 6.1 (4.4 – 8.1)     | 7.0 (4.4 – 10.5)§          | 53.4% (42.4 – 63.1)§         | 0.67 (0.49 – 0.89)‡                                      | 0.67 (0.50 – 0.89)‡ | 0.67 (0.49 – 0.89)‡ | 0.00 (-0.13 – 0.12)    |  |
| United Republic of Tanzania | 1st             | 171.9 (152.4 – 193.2)                                      | 133.3 (120.4 – 147.3) | 63.0 (49.8 – 80.9)  | 108.9 (84.1 – 132.8)§      | 63.3% (52.4 – 71.5)§         | 0.96 (0.86 – 1.06)                                       | 1.01 (0.93 – 1.10)  | 1.11 (0.99 – 1.25)  | 0.15 (0.00 – 0.30)     |  |
|                             | 2nd             | 207.6 (188.5 – 228.4)                                      | 148.1 (135.1 – 162.1) | 64.2 (50.9 – 81.2)  | 143.4 (118.3 – 167.1)§     | 69.1% (60.2 – 75.7)§         | 1.16 (1.07 – 1.25)‡                                      | 1.12 (1.05 – 1.20)‡ | 1.13 (1.03 – 1.24)‡ | -0.03 (-0.17 – 0.10)   |  |
|                             | 3rd             | 190.0 (175.5 – 204.7)                                      | 140.5 (129.6 – 152.0) | 57.9 (46.8 – 72.5)  | 132.1 (112.5 – 149.5)§     | 69.5% (61.4 – 75.5)§         | 1.06 (1.01 – 1.12)‡                                      | 1.07 (1.01 – 1.12)‡ | 1.02 (0.96 – 1.09)  | -0.04 (-0.12 – 0.03)   |  |
|                             | 4th             | 181.8 (163.9 – 201.5)                                      | 127.6 (115.4 – 140.8) | 50.8 (40.0 – 64.7)  | 131.1 (108.9 – 152.8)§     | 72.1% (63.8 – 78.1)§         | 1.02 (0.93 – 1.11)                                       | 0.97 (0.90 – 1.05)  | 0.90 (0.80 – 0.99)‡ | -0.12 (-0.25 – 0.00)   |  |
|                             | 5th             | 142.1 (124.5 – 161.3)                                      | 109.4 (97.6 – 122.2)  | 47.5 (37.3 – 61.2)  | 94.5 (72.9 – 115.3)§       | 66.5% (56.2 – 74.3)§         | 0.80 (0.71 – 0.89)‡                                      | 0.83 (0.75 – 0.91)‡ | 0.84 (0.74 – 0.96)‡ | 0.04 (-0.08 – 0.18)    |  |
| Uzbekistan                  | 1st             | 80.5 (66.4 – 96.7)                                         | 70.8 (57.9 – 86.1)    | 29.5 (23.0 – 37.4)  | 51.0 (39.0 – 64.3)§        | 63.4% (55.1 – 70.1)§         | 1.11 (0.96 – 1.27)                                       | 1.12 (0.98 – 1.27)  | 1.22 (1.04 – 1.43)‡ | 0.11 (-0.07 – 0.31)    |  |
|                             | 2nd             | 83.7 (70.1 – 98.1)                                         | 73.3 (60.8 – 88.0)    | 27.8 (22.0 – 34.2)  | 55.9 (45.1 – 68.1)§        | 66.8% (60.4 – 72.6)§         | 1.16 (1.05 – 1.27)‡                                      | 1.16 (1.05 – 1.27)‡ | 1.15 (1.02 – 1.29)‡ | -0.01 (-0.16 – 0.14)   |  |
|                             | 3rd             | 74.4 (63.8 – 86.3)                                         | 64.3 (54.0 – 76.4)    | 24.1 (19.5 – 29.2)  | 50.3 (42.0 – 59.6)§        | 67.7% (62.5 – 72.3)§         | 1.03 (0.95 – 1.10)                                       | 1.02 (0.95 – 1.10)  | 1.00 (0.91 – 1.08)  | -0.03 (-0.11 – 0.05)   |  |
|                             | 4th             | 63.5 (52.9 – 75.8)                                         | 55.0 (45.0 – 66.9)    | 20.0 (15.6 – 25.1)  | 43.5 (34.7 – 53.9)§        | 68.5% (61.6 – 74.5)§         | 0.88 (0.78 – 0.99)‡                                      | 0.87 (0.77 – 0.98)‡ | 0.83 (0.71 – 0.95)‡ | -0.05 (-0.18 – 0.08)   |  |
|                             | 5th             | 59.4 (47.3 – 73.9)                                         | 51.5 (40.7 – 65.2)    | 19.2 (14.2 – 25.2)  | 40.3 (30.6 – 51.7)§        | 67.8% (60.0 – 74.4)§         | 0.82 (0.69 – 0.98)‡                                      | 0.82 (0.69 – 0.97)‡ | 0.79 (0.64 – 0.97)‡ | -0.03 (-0.18 – 0.13)   |  |
| Vanuatu                     | 1st             | 46.8 (36.6 – 58.8)                                         | 38.0 (30.0 – 47.5)    | 36.6 (23.5 – 57.5)  | 10.2 (-11.2 – 26.3)        | 21.8% (-26.1 – 50.6)         | 1.32 (1.10 – 1.54)‡                                      | 1.32 (1.11 – 1.55)‡ | 1.33 (1.10 – 1.57)‡ | 0.01 (-0.18 – 0.21)    |  |
|                             | 2nd             | 41.6 (34.0 – 50.9)                                         | 33.4 (27.2 – 40.4)    | 32.1 (20.9 – 49.4)  | 9.5 (-8.9 – 23.3)          | 22.8% (-23.1 – 51.1)         | 1.17 (1.04 – 1.31)‡                                      | 1.16 (1.03 – 1.30)‡ | 1.16 (1.02 – 1.30)‡ | -0.01 (-0.16 – 0.13)   |  |
|                             | 3rd             | 36.0 (29.8 – 43.3)                                         | 29.0 (24.1 – 34.5)    | 27.9 (18.3 – 42.5)  | 8.1 (-7.6 – 19.7)          | 22.4% (-22.0 – 50.4)         | 1.01 (0.93 – 1.10)                                       | 1.01 (0.92 – 1.10)  | 1.01 (0.92 – 1.09)  | 0.00 (-0.07 – 0.07)    |  |
|                             | 4th             | 30.2 (24.2 – 37.5)                                         | 24.4 (19.5 – 30.0)    | 23.4 (15.1 – 36.5)  | 6.8 (-6.8 – 17.2)          | 22.5% (-25.1 – 51.5)         | 0.85 (0.74 – 0.98)‡                                      | 0.85 (0.73 – 0.98)‡ | 0.85 (0.73 – 0.98)‡ | 0.00 (-0.13 – 0.13)    |  |
|                             | 5th             | 23.0 (16.1 – 31.9)                                         | 18.6 (13.1 – 25.5)    | 18.0 (10.8 – 29.6)  | 5.0 (-5.8 – 13.9)          | 21.7% (-29.1 – 51.6)         | 0.65 (0.47 – 0.85)‡                                      | 0.65 (0.48 – 0.86)‡ | 0.65 (0.48 – 0.86)‡ | 0.00 (-0.11 – 0.12)    |  |
| Viet Nam                    | 1st             | 72.4 (61.7 – 84.4)                                         | 43.9 (35.3 – 53.6)    | 31.6 (25.3 – 39.8)  | 40.8 (29.0 – 52.7)§        | 56.4% (44.6 – 65.4)§         | 1.42 (1.24 – 1.61)‡                                      | 1.46 (1.28 – 1.66)‡ | 1.46 (1.25 – 1.69)‡ | 0.04 (-0.18 – 0.26)    |  |
|                             | 2nd             | 58.9 (51.1 – 67.1)                                         | 34.3 (27.9 – 41.1)    | 24.6 (20.2 – 30.5)  | 34.3 (25.4 – 42.9)§        | 58.3% (47.4 – 66.5)§         | 1.16 (1.03 – 1.28)‡                                      | 1.14 (1.02 – 1.27)‡ | 1.14 (1.00 – 1.27)‡ | -0.02 (-0.17 – 0.14)   |  |
|                             | 3rd             | 51.3 (45.8 – 57.0)                                         | 29.7 (24.3 – 35.3)    | 21.4 (18.0 – 26.0)  | 29.8 (23.1 – 36.0)§        | 58.2% (48.6 – 65.3)§         | 1.00 (0.93 – 1.08)                                       | 0.99 (0.91 – 1.07)  | 0.99 (0.90 – 1.08)  | -0.01 (-0.10 – 0.07)   |  |
|                             | 4th             | 42.0 (35.9 – 48.5)                                         | 24.4 (19.5 – 29.8)    | 17.4 (14.0 – 21.8)  | 24.6 (17.6 – 31.4)§        | 58.5% (46.8 – 67.5)§         | 0.82 (0.72 – 0.93)‡                                      | 0.81 (0.71 – 0.92)‡ | 0.81 (0.68 – 0.93)‡ | -0.02 (-0.16 – 0.12)   |  |
|                             | 5th             | 30.4 (23.5 – 38.6)                                         | 17.7 (13.2 – 23.3)    | 13.0 (9.7 – 17.6)   | 17.5 (11.3 – 24.2)§        | 57.4% (43.6 – 67.1)§         | 0.60 (0.47 – 0.74)‡                                      | 0.59 (0.47 – 0.74)‡ | 0.60 (0.46 – 0.77)‡ | 0.00 (-0.11 – 0.13)    |  |
| Yemen                       | 1st             | 160.3 (135.9 – 187.4)                                      | 127.1 (108.2 – 147.8) | 76.1 (52.9 – 107.6) | 84.1 (49.3 – 116.0)§       | 52.5% (32.7 – 66.9)§         | 1.27 (1.09 – 1.48)‡                                      | 1.34 (1.17 – 1.52)‡ | 1.38 (1.18 – 1.59)‡ | 0.10 (-0.09 – 0.30)    |  |
|                             | 2nd             | 142.2 (124.6 – 160.5)                                      | 107.4 (93.8 – 122.2)  | 64.4 (45.1 – 90.0)  | 77.8 (48.1 – 103.4)§       | 54.7% (35.8 – 68.4)§         | 1.13 (1.01 – 1.25)‡                                      | 1.13 (1.01 – 1.24)‡ | 1.17 (1.04 – 1.29)‡ | 0.03 (-0.11 – 0.18)    |  |
|                             | 3rd             | 133.1 (120.5 – 146.0)                                      | 99.9 (89.2 – 110.9)   | 56.4 (40.1 – 78.3)  | 76.7 (52.0 – 96.4)§        | 57.6% (40.5 – 70.0)§         | 1.06 (0.98 – 1.13)                                       | 1.05 (0.97 – 1.12)  | 1.02 (0.94 – 1.10)  | -0.04 (-0.12 – 0.04)   |  |
|                             | 4th             | 116.7 (101.0 – 133.8)                                      | 84.3 (72.9 – 97.0)    | 47.3 (33.1 – 66.9)  | 69.4 (46.1 – 90.1)§        | 59.5% (42.1 – 71.9)§         | 0.93 (0.82 – 1.05)                                       | 0.89 (0.78 – 0.99)‡ | 0.85 (0.75 – 0.97)‡ | -0.07 (-0.20 – 0.06)   |  |
|                             | 5th             | 76.7 (59.3 – 97.7)                                         | 56.8 (44.1 – 72.1)    | 32.3 (21.0 – 48.9)  | 44.4 (26.1 – 63.0)§        | 57.9% (39.1 – 71.4)§         | 0.61 (0.47 – 0.77)‡                                      | 0.60 (0.47 – 0.75)‡ | 0.58 (0.45 – 0.74)‡ | -0.03 (-0.14 – 0.09)   |  |
| Zambia                      | 1st             | 196.4 (176.6 – 218.2)                                      | 172.1 (155.2 – 191.4) | 76.8 (55.0 – 104.9) | 119.6 (86.1 – 149.2)§      | 60.9% (46.2 – 72.2)§         | 1.08 (0.99 – 1.17)                                       | 1.07 (0.99 – 1.15)  | 1.21 (1.08 – 1.35)‡ | 0.13 (-0.02 – 0.29)    |  |
|                             | 2nd             | 199.3 (180.8 – 219.2)                                      | 174.3 (158.4 – 191.9) | 71.5 (51.7 – 97.3)  | 127.9 (97.8 – 154.9)§      | 64.2% (51.1 – 74.3)§         | 1.09 (1.01 – 1.17)‡                                      | 1.09 (1.02 – 1.16)‡ | 1.13 (1.03 – 1.23)‡ | 0.03 (-0.09 – 0.16)    |  |
|                             | 3rd             | 188.2 (173.7 – 203.4)                                      | 168.2 (154.7 – 182.9) | 64.5 (46.8 – 87.2)  | 123.7 (98.4 – 145.7)§      | 65.7% (53.7 – 75.2)§         | 1.03 (0.98 – 1.08)                                       | 1.05 (1.00 – 1.10)  | 1.02 (0.96 – 1.08)  | -0.02 (-0.09 – 0.06)   |  |
|                             | 4th             | 187.5 (169.0 – 207.6)                                      | 161.9 (145.9 – 180.2) | 55.8 (40.0 – 76.3)  | 131.7 (104.6 – 156.1)§     | 70.3% (58.8 – 78.8)§         | 1.03 (0.95 – 1.12)                                       | 1.01 (0.93 – 1.09)  | 0.88 (0.79 – 0.98)‡ | -0.15 (-0.27 – -0.03)§ |  |
|                             | 5th             | 139.6 (123.6 – 157.1)                                      | 126.5 (112.7 – 141.7) | 48.5 (34.5 – 66.8)  | 91.1 (68.2 – 112.3)§       | 65.3% (51.7 – 75.5)§         | 0.77 (0.69 – 0.85)‡                                      | 0.79 (0.72 – 0.86)‡ | 0.76 (0.66 – 0.87)‡ | 0.00 (-0.12 – 0.12)    |  |

Continued on next page

‡: Ratio is significantly different from one.

§: Change/decline is significantly different from zero.

Absolute decline: wealth quintile-specific U5MR (1990) - wealth quintile-specific U5MR (2016).

Percentage decline: absolute decline over wealth quintile-specific U5MR (1990) × 100.

Change in ratio: ratio (2016) - ratio (1990).

Table 8 – continued from previous page

|          | Wealth Quintile | wealth quintile-specific U5MR (deaths per 1000 livebirths) |                      |                    |                            |                              | Ratio of wealth quintile-specific to national-level U5MR |                     |                     |                      |
|----------|-----------------|------------------------------------------------------------|----------------------|--------------------|----------------------------|------------------------------|----------------------------------------------------------|---------------------|---------------------|----------------------|
|          |                 | 1990                                                       | 2000                 | 2016               | Absolute decline 1990–2016 | Percentage decline 1990–2016 | 1990                                                     | 2000                | 2016                | Change 1990–2016     |
| Zimbabwe | 1st             | 82.4 (71.3 – 94.1)                                         | 106.8 (93.9 – 120.8) | 67.9 (51.0 – 88.9) | 14.5 (-8.1 – 33.4)         | 17.6% (-10.2 – 38.6)         | 1.10 (0.98 – 1.22)                                       | 1.10 (1.00 – 1.21)‡ | 1.20 (1.07 – 1.34)‡ | 0.11 (-0.04 – 0.27)  |
|          | 2nd             | 83.3 (73.5 – 94.0)                                         | 105.6 (93.7 – 117.9) | 64.4 (48.7 – 83.0) | 19.0 (-1.0 – 37.2)         | 22.7% (-1.2 – 42.4)          | 1.11 (1.01 – 1.20)‡                                      | 1.09 (1.00 – 1.18)‡ | 1.14 (1.04 – 1.25)‡ | 0.03 (-0.10 – 0.16)  |
|          | 3rd             | 78.7 (70.7 – 87.1)                                         | 102.6 (92.5 – 113.4) | 57.9 (44.4 – 74.1) | 20.9 (3.8 – 35.7)§         | 26.5% (4.9 – 43.7)§          | 1.05 (0.98 – 1.11)                                       | 1.06 (1.00 – 1.12)  | 1.03 (0.96 – 1.09)  | -0.02 (-0.09 – 0.05) |
|          | 4th             | 71.7 (62.9 – 81.4)                                         | 91.6 (81.1 – 103.5)  | 49.9 (37.6 – 65.0) | 21.8 (5.2 – 36.4)§         | 30.4% (7.7 – 48.1)§          | 0.95 (0.86 – 1.05)                                       | 0.95 (0.87 – 1.03)  | 0.88 (0.79 – 0.98)‡ | -0.07 (-0.19 – 0.05) |
|          | 5th             | 59.8 (50.9 – 69.7)                                         | 77.4 (66.8 – 89.2)   | 41.9 (31.0 – 55.0) | 17.9 (3.5 – 31.5)§         | 29.9% (6.3 – 48.7)§          | 0.80 (0.70 – 0.91)‡                                      | 0.80 (0.71 – 0.89)‡ | 0.74 (0.64 – 0.85)‡ | -0.05 (-0.18 – 0.07) |

‡: Ratio is significantly different from one.

§: Change/decline is significantly different from zero.

Absolute decline: wealth quintile-specific U5MR (1990) - wealth quintile-specific U5MR (2016).

Percentage decline: absolute decline over wealth quintile-specific U5MR (1990) × 100.

Change in ratio: ratio (2016) - ratio (1990).

Table 9: Number of wealth quintile-specific under-5 deaths, by wealth quintile, for all the low-income and middle-income countries (excluding China) combined, and by region and the 99 countries with empirical data. Estimates and 90% uncertainty intervals for (i) number of wealth quintile-specific under-5 deaths in 1990, 2000, and 2016; (ii) the absolute and percentage declines in wealth quintile-specific under-5 deaths from 1990 to 2016; (iii) the percentage of wealth quintile-specific under-5 deaths among all under-5 deaths in 1990, 2000, and 2016; by wealth quintile, for the 99 countries with empirical data. Numbers in brackets are 90% uncertainty intervals. The share of total death by wealth quintile may not add up to 100% due to rounding. Countries are ordered alphabetically.

|                                                        | Wealth Quintile | number of wealth quintile-specific under-5 deaths |                                   |                                   |                                   |                              | Share of total death (in percentage) |      |      |
|--------------------------------------------------------|-----------------|---------------------------------------------------|-----------------------------------|-----------------------------------|-----------------------------------|------------------------------|--------------------------------------|------|------|
|                                                        |                 | 1990                                              | 2000                              | 2016                              | Absolute decline 1990–2016        | Percentage decline 1990–2016 | 1990                                 | 2000 | 2016 |
| All low-income and middle-income countries (excluding) | 1st             | 2,740,000 (2,670,000 – 2,810,000)                 | 2,280,000 (2,220,000 – 2,350,000) | 1,410,000 (1,330,000 – 1,530,000) | 1,330,000 (1,190,000 – 1,430,000) | 48.6%                        | 24.8                                 | 24.9 | 26.1 |
|                                                        | 2nd             | 2,620,000 (2,550,000 – 2,680,000)                 | 2,160,000 (2,100,000 – 2,220,000) | 1,270,000 (1,200,000 – 1,380,000) | 1,350,000 (1,230,000 – 1,440,000) | 51.6%                        | 23.7                                 | 23.6 | 23.4 |
|                                                        | 3rd             | 2,320,000 (2,270,000 – 2,380,000)                 | 1,930,000 (1,890,000 – 1,970,000) | 1,120,000 (1,060,000 – 1,210,000) | 1,200,000 (1,100,000 – 1,280,000) | 51.7%                        | 21.0                                 | 21.0 | 20.7 |
|                                                        | 4th             | 2,000,000 (1,950,000 – 2,060,000)                 | 1,650,000 (1,610,000 – 1,700,000) | 928,000 (878,000 – 1,010,000)     | 1,080,000 (983,000 – 1,150,000)   | 53.9%                        | 18.2                                 | 18.0 | 17.2 |
|                                                        | 5th             | 1,350,000 (1,310,000 – 1,400,000)                 | 1,150,000 (1,110,000 – 1,180,000) | 684,000 (645,000 – 746,000)       | 667,000 (595,000 – 717,000)       | 49.4%                        | 12.2                                 | 12.5 | 12.7 |
| South Asia                                             | 1st             | 1,230,000 (1,170,000 – 1,280,000)                 | 939,000 (888,000 – 989,000)       | 468,000 (413,000 – 526,000)       | 759,000 (679,000 – 835,000)       | 61.9%                        | 25.9                                 | 26.6 | 27.3 |
|                                                        | 2nd             | 1,170,000 (1,120,000 – 1,230,000)                 | 862,000 (817,000 – 910,000)       | 413,000 (368,000 – 463,000)       | 760,000 (686,000 – 830,000)       | 64.8%                        | 24.8                                 | 24.5 | 24.1 |
|                                                        | 3rd             | 1,000,000 (960,000 – 1,040,000)                   | 744,000 (711,000 – 780,000)       | 353,000 (317,000 – 390,000)       | 647,000 (593,000 – 699,000)       | 64.7%                        | 21.1                                 | 21.1 | 20.6 |
|                                                        | 4th             | 820,000 (781,000 – 861,000)                       | 588,000 (554,000 – 625,000)       | 286,000 (252,000 – 324,000)       | 534,000 (480,000 – 586,000)       | 65.1%                        | 17.3                                 | 16.7 | 16.7 |
|                                                        | 5th             | 511,000 (484,000 – 540,000)                       | 389,000 (364,000 – 416,000)       | 194,000 (169,000 – 226,000)       | 317,000 (276,000 – 354,000)       | 62.1%                        | 10.8                                 | 11.0 | 11.3 |
| Eastern Europe and Central Asia                        | 1st             | 86,900 (81,500 – 93,000)                          | 50,700 (47,400 – 54,600)          | 23,700 (21,200 – 27,800)          | 63,200 (57,300 – 68,700)          | 72.7%                        | 26.3                                 | 26.4 | 27.0 |
|                                                        | 2nd             | 75,800 (72,000 – 80,200)                          | 44,400 (41,800 – 47,400)          | 20,200 (18,100 – 23,600)          | 55,600 (51,000 – 59,600)          | 73.3%                        | 22.9                                 | 23.1 | 23.0 |
|                                                        | 3rd             | 67,400 (64,400 – 70,800)                          | 38,700 (36,700 – 41,000)          | 17,500 (15,800 – 20,300)          | 49,900 (46,300 – 53,000)          | 74.0%                        | 20.4                                 | 20.2 | 20.0 |
|                                                        | 4th             | 56,600 (53,300 – 60,400)                          | 32,200 (30,100 – 34,600)          | 14,300 (12,500 – 16,900)          | 42,300 (38,600 – 45,800)          | 74.8%                        | 17.1                                 | 16.8 | 16.2 |
|                                                        | 5th             | 44,100 (40,100 – 48,800)                          | 26,000 (23,500 – 28,800)          | 12,100 (10,500 – 14,500)          | 32,100 (28,200 – 35,800)          | 72.8%                        | 13.3                                 | 13.5 | 13.7 |
| Eastern and Southern Africa                            | 1st             | 391,000 (374,000 – 410,000)                       | 410,000 (396,000 – 427,000)       | 264,000 (243,000 – 300,000)       | 127,000 (88,000 – 153,000)        | 32.5%                        | 21.1                                 | 21.6 | 24.0 |
|                                                        | 2nd             | 415,000 (399,000 – 432,000)                       | 419,000 (405,000 – 435,000)       | 253,000 (233,000 – 286,000)       | 162,000 (127,000 – 186,000)       | 39.1%                        | 22.4                                 | 22.1 | 22.9 |
|                                                        | 3rd             | 390,000 (378,000 – 405,000)                       | 399,000 (386,000 – 413,000)       | 226,000 (209,000 – 255,000)       | 164,000 (134,000 – 185,000)       | 42.0%                        | 21.1                                 | 21.1 | 20.5 |
|                                                        | 4th             | 374,000 (358,000 – 391,000)                       | 377,000 (363,000 – 392,000)       | 196,000 (180,000 – 223,000)       | 178,000 (148,000 – 199,000)       | 47.6%                        | 20.2                                 | 19.9 | 17.8 |
|                                                        | 5th             | 281,000 (267,000 – 297,000)                       | 289,000 (277,000 – 303,000)       | 163,000 (149,000 – 187,000)       | 117,000 (91,100 – 136,000)        | 41.7%                        | 15.2                                 | 15.3 | 14.8 |
| West and Central Africa                                | 1st             | 469,000 (443,000 – 497,000)                       | 524,000 (501,000 – 549,000)       | 445,000 (387,000 – 525,000)       | 24,400 (-61,500 – 86,200)         | 5.2%                         | 23.0                                 | 23.2 | 25.3 |
|                                                        | 2nd             | 475,000 (452,000 – 500,000)                       | 533,000 (509,000 – 557,000)       | 409,000 (358,000 – 483,000)       | 65,700 (-11,600 – 121,000)        | 13.8%                        | 23.3                                 | 23.6 | 23.3 |
|                                                        | 3rd             | 438,000 (419,000 – 457,000)                       | 482,000 (464,000 – 502,000)       | 372,000 (326,000 – 436,000)       | 65,600 (660 – 113,000)            | 15.0%                        | 21.4                                 | 21.4 | 21.2 |
|                                                        | 4th             | 396,000 (375,000 – 419,000)                       | 433,000 (413,000 – 453,000)       | 308,000 (270,000 – 362,000)       | 88,200 (30,400 – 131,000)         | 22.2%                        | 19.4                                 | 19.2 | 17.6 |
|                                                        | 5th             | 264,000 (249,000 – 280,000)                       | 284,000 (271,000 – 299,000)       | 222,000 (195,000 – 260,000)       | 42,000 (1,770 – 71,600)           | 15.9%                        | 12.9                                 | 12.6 | 12.6 |
| Latin America and Caribbean                            | 1st             | 175,000 (162,000 – 189,000)                       | 107,000 (98,500 – 115,000)        | 51,600 (46,300 – 58,600)          | 124,000 (111,000 – 137,000)       | 70.7%                        | 27.2                                 | 27.8 | 28.0 |
|                                                        | 2nd             | 150,000 (141,000 – 159,000)                       | 89,200 (83,700 – 95,000)          | 42,700 (38,800 – 47,800)          | 107,000 (97,800 – 116,000)        | 71.3%                        | 23.3                                 | 23.3 | 23.2 |
|                                                        | 3rd             | 131,000 (124,000 – 137,000)                       | 76,700 (72,700 – 81,000)          | 36,900 (33,900 – 40,600)          | 94,000 (87,300 – 100,000)         | 71.8%                        | 20.3                                 | 20.0 | 20.0 |
|                                                        | 4th             | 109,000 (101,000 – 117,000)                       | 63,300 (58,500 – 68,100)          | 29,900 (26,300 – 34,100)          | 79,000 (70,700 – 87,000)          | 72.6%                        | 16.9                                 | 16.5 | 16.2 |
|                                                        | 5th             | 79,000 (69,400 – 90,300)                          | 47,200 (41,500 – 53,700)          | 23,300 (20,100 – 27,600)          | 55,600 (47,200 – 64,800)          | 70.4%                        | 12.3                                 | 12.3 | 12.7 |
| East Asia and Pacific (excluding China)                | 1st             | 248,000 (233,000 – 264,000)                       | 169,000 (159,000 – 179,000)       | 96,800 (85,600 – 112,000)         | 151,000 (130,000 – 170,000)       | 60.9%                        | 27.4                                 | 28.0 | 28.8 |
|                                                        | 2nd             | 207,000 (196,000 – 218,000)                       | 139,000 (132,000 – 147,000)       | 77,400 (68,800 – 89,500)          | 129,000 (114,000 – 142,000)       | 62.3%                        | 22.8                                 | 23.1 | 23.1 |
|                                                        | 3rd             | 187,000 (179,000 – 196,000)                       | 123,000 (117,000 – 129,000)       | 67,300 (60,000 – 77,400)          | 120,000 (108,000 – 130,000)       | 64.0%                        | 20.7                                 | 20.4 | 20.0 |
|                                                        | 4th             | 157,000 (147,000 – 167,000)                       | 102,000 (95,400 – 108,000)        | 55,400 (48,600 – 64,700)          | 102,000 (88,900 – 113,000)        | 65.0%                        | 17.3                                 | 16.9 | 16.5 |
|                                                        | 5th             | 106,000 (96,200 – 117,000)                        | 69,400 (62,900 – 76,600)          | 38,900 (33,600 – 46,100)          | 67,400 (56,800 – 77,400)          | 63.4%                        | 11.7                                 | 11.5 | 11.6 |
| Middle East and North Africa                           | 1st             | 140,000 (132,000 – 148,000)                       | 84,700 (79,800 – 89,600)          | 61,200 (54,300 – 70,900)          | 78,300 (66,600 – 88,100)          | 56.1%                        | 26.5                                 | 27.0 | 27.2 |
|                                                        | 2nd             | 122,000 (116,000 – 128,000)                       | 72,100 (68,500 – 76,000)          | 51,600 (46,000 – 59,300)          | 69,900 (60,300 – 77,800)          | 57.5%                        | 23.1                                 | 22.9 | 22.9 |
|                                                        | 3rd             | 108,000 (104,000 – 113,000)                       | 63,500 (60,700 – 66,500)          | 45,100 (40,400 – 51,600)          | 63,200 (55,700 – 69,000)          | 58.4%                        | 20.6                                 | 20.2 | 20.0 |
|                                                        | 4th             | 91,700 (86,500 – 97,200)                          | 54,200 (50,900 – 57,600)          | 37,900 (33,400 – 44,100)          | 53,800 (46,000 – 60,100)          | 58.7%                        | 17.4                                 | 17.2 | 16.8 |
|                                                        | 5th             | 65,400 (59,300 – 72,100)                          | 39,800 (36,300 – 43,500)          | 29,700 (26,000 – 34,900)          | 35,700 (28,800 – 42,000)          | 54.6%                        | 12.4                                 | 12.7 | 13.2 |

Continued on next page

Absolute decline: wealth quintile-specific under-5 deaths (1990) - wealth quintile-specific under-5 deaths (2016).

Percentage decline: absolute decline over wealth quintile-specific under-5 deaths (1990) × 100.

Share of total death (in percentage): wealth quintile-specific under-5 deaths over the total under-5 deaths × 100.

Table 9 – continued from previous page

|             | Wealth Quintile | number of wealth quintile-specific under-5 deaths |                          |                          |                            |                              | Share of total death (in percentage) |      |      |
|-------------|-----------------|---------------------------------------------------|--------------------------|--------------------------|----------------------------|------------------------------|--------------------------------------|------|------|
|             |                 | 1990                                              | 2000                     | 2016                     | Absolute decline 1990–2016 | Percentage decline 1990–2016 | 1990                                 | 2000 | 2016 |
| Afghanistan | 1st             | 24,600 (20,900 – 28,900)                          | 29,300 (25,600 – 33,500) | 20,500 (16,000 – 25,300) | 4,030 (-1,720 – 9,880)     | 16.4%                        | 22.8                                 | 24.1 | 25.7 |
|             | 2nd             | 24,400 (21,400 – 27,700)                          | 27,500 (24,500 – 30,700) | 18,300 (14,400 – 22,500) | 6,100 (1,200 – 11,100)     | 25.0%                        | 22.6                                 | 22.6 | 23.0 |
|             | 3rd             | 23,000 (20,600 – 25,500)                          | 25,900 (23,500 – 28,300) | 16,600 (13,200 – 20,100) | 6,380 (2,250 – 10,500)     | 27.8%                        | 21.3                                 | 21.2 | 20.8 |
|             | 4th             | 21,700 (18,700 – 25,000)                          | 23,200 (20,400 – 26,300) | 14,100 (11,100 – 17,400) | 7,580 (3,370 – 11,800)     | 35.0%                        | 20.1                                 | 19.0 | 17.6 |
|             | 5th             | 14,300 (11,800 – 17,200)                          | 16,000 (13,700 – 18,700) | 10,300 (7,920 – 13,100)  | 3,970 (712 – 7,510)        | 27.8%                        | 13.2                                 | 13.1 | 12.9 |
| Albania     | 1st             | 783 (628 – 948)                                   | 346 (272 – 430)          | 122 (64 – 228)           | 660 (480 – 826)            | 84.3%                        | 24.7                                 | 25.1 | 26.2 |
|             | 2nd             | 751 (634 – 880)                                   | 324 (266 – 394)          | 109 (58 – 200)           | 642 (493 – 777)            | 85.5%                        | 23.7                                 | 23.5 | 23.3 |
|             | 3rd             | 646 (555 – 741)                                   | 281 (233 – 335)          | 95 (50 – 174)            | 552 (433 – 651)            | 85.4%                        | 20.4                                 | 20.4 | 20.3 |
|             | 4th             | 546 (450 – 649)                                   | 236 (190 – 290)          | 76 (40 – 140)            | 469 (355 – 575)            | 86.0%                        | 17.2                                 | 17.1 | 16.3 |
|             | 5th             | 439 (324 – 580)                                   | 192 (140 – 262)          | 65 (33 – 128)            | 374 (255 – 501)            | 85.1%                        | 13.9                                 | 13.9 | 13.9 |
| Algeria     | 1st             | 10,600 (8,970 – 12,400)                           | 6,470 (5,580 – 7,410)    | 6,380 (5,380 – 7,480)    | 4,260 (2,600 – 5,990)      | 40.1%                        | 26.0                                 | 26.3 | 26.9 |
|             | 2nd             | 9,390 (8,160 – 10,600)                            | 5,590 (4,980 – 6,220)    | 5,320 (4,620 – 6,070)    | 4,070 (2,780 – 5,350)      | 43.3%                        | 23.0                                 | 22.8 | 22.5 |
|             | 3rd             | 8,160 (7,310 – 9,010)                             | 4,860 (4,440 – 5,260)    | 4,650 (4,140 – 5,190)    | 3,510 (2,660 – 4,370)      | 43.0%                        | 19.9                                 | 19.8 | 19.6 |
|             | 4th             | 6,950 (5,950 – 8,040)                             | 4,180 (3,640 – 4,750)    | 3,970 (3,370 – 4,650)    | 2,980 (1,920 – 4,080)      | 42.9%                        | 17.0                                 | 17.0 | 16.8 |
|             | 5th             | 5,770 (4,490 – 7,320)                             | 3,470 (2,780 – 4,310)    | 3,370 (2,640 – 4,250)    | 2,400 (1,350 – 3,610)      | 41.6%                        | 14.1                                 | 14.1 | 14.2 |
| Angola      | 1st             | 28,500 (24,200 – 33,700)                          | 33,600 (28,300 – 39,800) | 23,000 (11,300 – 41,400) | 5,600 (-12,400 – 17,900)   | 19.6%                        | 21.0                                 | 21.0 | 23.9 |
|             | 2nd             | 30,600 (26,400 – 35,200)                          | 35,900 (30,900 – 41,700) | 21,900 (10,900 – 39,400) | 8,630 (-8,910 – 20,500)    | 28.2%                        | 22.5                                 | 22.5 | 22.9 |
|             | 3rd             | 28,800 (25,200 – 32,700)                          | 33,800 (29,400 – 38,900) | 20,000 (9,980 – 35,100)  | 8,770 (-6,740 – 19,400)    | 30.5%                        | 21.1                                 | 21.2 | 20.8 |
|             | 4th             | 27,200 (23,200 – 31,500)                          | 31,800 (27,000 – 37,100) | 16,900 (8,380 – 30,100)  | 10,300 (-3,450 – 19,600)   | 37.9%                        | 20.0                                 | 19.9 | 17.6 |
|             | 5th             | 21,000 (17,300 – 25,600)                          | 24,700 (20,400 – 29,900) | 14,200 (6,970 – 25,600)  | 6,840 (-4,590 – 14,900)    | 32.6%                        | 15.4                                 | 15.5 | 14.8 |
| Armenia     | 1st             | 1,000 (824 – 1,190)                               | 329 (271 – 392)          | 149 (107 – 208)          | 851 (676 – 1,040)          | 85.1%                        | 26.3                                 | 27.0 | 27.9 |
|             | 2nd             | 888 (759 – 1,020)                                 | 283 (242 – 327)          | 123 (91 – 168)           | 765 (635 – 902)            | 86.2%                        | 23.4                                 | 23.2 | 23.0 |
|             | 3rd             | 767 (675 – 864)                                   | 243 (212 – 275)          | 106 (79 – 143)           | 661 (566 – 762)            | 86.2%                        | 20.2                                 | 19.9 | 19.9 |
|             | 4th             | 645 (543 – 757)                                   | 204 (171 – 241)          | 85 (61 – 118)            | 559 (458 – 670)            | 86.7%                        | 17.0                                 | 16.8 | 16.0 |
|             | 5th             | 496 (368 – 658)                                   | 159 (117 – 211)          | 71 (47 – 105)            | 425 (307 – 572)            | 85.7%                        | 13.1                                 | 13.1 | 13.2 |
| Azerbaijan  | 1st             | 4,610 (3,850 – 5,440)                             | 2,600 (2,170 – 3,100)    | 1,390 (811 – 2,390)      | 3,220 (2,020 – 4,170)      | 69.8%                        | 23.9                                 | 24.3 | 25.9 |
|             | 2nd             | 4,400 (3,800 – 5,050)                             | 2,490 (2,120 – 2,880)    | 1,260 (749 – 2,130)      | 3,140 (2,120 – 3,920)      | 71.4%                        | 22.8                                 | 23.2 | 23.5 |
|             | 3rd             | 4,110 (3,630 – 4,620)                             | 2,250 (1,960 – 2,570)    | 1,090 (652 – 1,840)      | 3,020 (2,130 – 3,670)      | 73.5%                        | 21.3                                 | 21.0 | 20.3 |
|             | 4th             | 3,540 (3,030 – 4,110)                             | 1,950 (1,650 – 2,300)    | 928 (547 – 1,580)        | 2,610 (1,780 – 3,280)      | 73.7%                        | 18.4                                 | 18.2 | 17.3 |
|             | 5th             | 2,620 (2,020 – 3,340)                             | 1,430 (1,090 – 1,830)    | 698 (396 – 1,240)        | 1,930 (1,210 – 2,610)      | 73.5%                        | 13.6                                 | 13.3 | 13.0 |
| Bangladesh  | 1st             | 128,000 (118,000 – 138,000)                       | 80,500 (74,100 – 87,000) | 28,000 (24,100 – 32,400) | 100,000 (89,500 – 110,000) | 78.1%                        | 24.1                                 | 25.5 | 26.5 |
|             | 2nd             | 123,000 (115,000 – 132,000)                       | 71,700 (66,000 – 77,200) | 24,700 (21,500 – 28,300) | 98,200 (89,100 – 108,000)  | 79.9%                        | 23.1                                 | 22.7 | 23.4 |
|             | 3rd             | 111,000 (105,000 – 118,000)                       | 65,700 (61,800 – 69,600) | 21,300 (18,900 – 23,900) | 90,000 (83,400 – 96,600)   | 80.8%                        | 20.9                                 | 20.8 | 20.1 |
|             | 4th             | 98,900 (91,000 – 107,000)                         | 56,200 (51,500 – 61,300) | 18,000 (15,500 – 20,900) | 80,900 (72,500 – 89,500)   | 81.8%                        | 18.6                                 | 17.8 | 17.1 |
|             | 5th             | 71,200 (64,600 – 78,000)                          | 41,800 (37,800 – 45,900) | 13,700 (11,500 – 16,300) | 57,400 (50,700 – 64,300)   | 80.6%                        | 13.4                                 | 13.2 | 13.0 |
| Belarus     | 1st             | 623 (510 – 743)                                   | 321 (263 – 383)          | 122 (99 – 147)           | 500 (404 – 606)            | 80.3%                        | 27.5                                 | 27.6 | 27.5 |
|             | 2nd             | 523 (450 – 599)                                   | 268 (230 – 306)          | 102 (87 – 118)           | 421 (355 – 489)            | 80.5%                        | 23.1                                 | 23.0 | 23.0 |
|             | 3rd             | 456 (407 – 503)                                   | 234 (208 – 257)          | 89 (78 – 99)             | 366 (325 – 407)            | 80.3%                        | 20.1                                 | 20.1 | 20.1 |
|             | 4th             | 365 (298 – 434)                                   | 187 (152 – 223)          | 71 (57 – 85)             | 294 (235 – 356)            | 80.5%                        | 16.1                                 | 16.1 | 16.1 |
|             | 5th             | 301 (220 – 401)                                   | 154 (113 – 204)          | 59 (43 – 79)             | 242 (175 – 326)            | 80.5%                        | 13.3                                 | 13.2 | 13.3 |
| Belize      | 1st             | 68 (54 – 83)                                      | 47 (39 – 56)             | 34 (27 – 41)             | 34 (21 – 48)               | 50.4%                        | 26.3                                 | 26.9 | 27.5 |
|             | 2nd             | 60 (50 – 71)                                      | 40 (35 – 46)             | 28 (24 – 33)             | 32 (22 – 43)               | 53.1%                        | 23.4                                 | 23.1 | 23.1 |
|             | 3rd             | 52 (45 – 60)                                      | 35 (31 – 39)             | 25 (21 – 28)             | 27 (20 – 35)               | 51.9%                        | 20.2                                 | 20.1 | 20.1 |
|             | 4th             | 44 (36 – 53)                                      | 29 (25 – 34)             | 20 (16 – 24)             | 24 (16 – 33)               | 55.2%                        | 16.9                                 | 16.7 | 16.2 |
|             | 5th             | 34 (24 – 46)                                      | 23 (17 – 31)             | 16 (12 – 22)             | 18 (11 – 27)               | 53.4%                        | 13.1                                 | 13.2 | 13.2 |

Continued on next page

Absolute decline: wealth quintile-specific under-5 deaths (1990) - wealth quintile-specific under-5 deaths (2016).

Percentage decline: absolute decline over wealth quintile-specific under-5 deaths (1990) × 100.

Share of total death (in percentage): wealth quintile-specific under-5 deaths over the total under-5 deaths × 100.

Table 9 – continued from previous page

|                                     | Wealth Quintile | number of wealth quintile-specific under-5 deaths |                          |                          |                            |                              | Share of total death (in percentage) |      |      |
|-------------------------------------|-----------------|---------------------------------------------------|--------------------------|--------------------------|----------------------------|------------------------------|--------------------------------------|------|------|
|                                     |                 | 1990                                              | 2000                     | 2016                     | Absolute decline 1990–2016 | Percentage decline 1990–2016 | 1990                                 | 2000 | 2016 |
| Benin                               | 1st             | 8,700 (7,740 – 9,730)                             | 9,210 (8,280 – 10,200)   | 9,110 (6,750 – 12,600)   | -413 (-3,930 – 2,150)      | -4.8%                        | 22.3                                 | 22.8 | 23.9 |
|                                     | 2nd             | 8,740 (7,900 – 9,680)                             | 9,070 (8,180 – 10,000)   | 8,770 (6,560 – 12,000)   | -26 (-3,190 – 2,360)       | -0.3%                        | 22.4                                 | 22.4 | 23.0 |
|                                     | 3rd             | 8,450 (7,760 – 9,190)                             | 8,850 (8,100 – 9,680)    | 8,230 (6,220 – 11,200)   | 222 (-2,650 – 2,300)       | 2.6%                         | 21.7                                 | 21.9 | 21.6 |
|                                     | 4th             | 7,540 (6,750 – 8,400)                             | 7,640 (6,880 – 8,480)    | 6,780 (5,080 – 9,320)    | 759 (-1,770 – 2,640)       | 10.1%                        | 19.3                                 | 18.9 | 17.8 |
|                                     | 5th             | 5,590 (4,870 – 6,420)                             | 5,640 (4,990 – 6,380)    | 5,230 (3,820 – 7,350)    | 353 (-1,740 – 1,950)       | 6.3%                         | 14.3                                 | 14.0 | 13.7 |
| Bhutan                              | 1st             | 663 (541 – 807)                                   | 347 (289 – 413)          | 136 (92 – 192)           | 528 (401 – 672)            | 79.6%                        | 25.8                                 | 27.5 | 29.0 |
|                                     | 2nd             | 580 (491 – 687)                                   | 287 (247 – 332)          | 108 (75 – 151)           | 471 (373 – 586)            | 81.3%                        | 22.5                                 | 22.8 | 23.1 |
|                                     | 3rd             | 540 (470 – 627)                                   | 260 (229 – 293)          | 93 (65 – 129)            | 447 (367 – 538)            | 82.7%                        | 21.0                                 | 20.6 | 19.9 |
|                                     | 4th             | 472 (397 – 567)                                   | 217 (184 – 254)          | 77 (53 – 109)            | 395 (313 – 491)            | 83.7%                        | 18.4                                 | 17.2 | 16.5 |
|                                     | 5th             | 316 (234 – 422)                                   | 150 (111 – 196)          | 54 (35 – 83)             | 261 (185 – 360)            | 82.7%                        | 12.3                                 | 11.9 | 11.6 |
| Bolivia<br>(Plurinational State of) | 1st             | 8,130 (7,370 – 8,910)                             | 5,790 (5,230 – 6,380)    | 2,770 (1,900 – 3,920)    | 5,360 (4,010 – 6,500)      | 65.9%                        | 27.6                                 | 28.5 | 29.9 |
|                                     | 2nd             | 6,800 (6,190 – 7,470)                             | 4,880 (4,410 – 5,370)    | 2,210 (1,530 – 3,130)    | 4,600 (3,540 – 5,520)      | 67.6%                        | 23.1                                 | 24.0 | 23.8 |
|                                     | 3rd             | 6,210 (5,730 – 6,690)                             | 4,180 (3,820 – 4,550)    | 1,860 (1,290 – 2,610)    | 4,360 (3,510 – 5,070)      | 70.2%                        | 21.1                                 | 20.6 | 20.0 |
|                                     | 4th             | 5,290 (4,750 – 5,870)                             | 3,440 (3,060 – 3,840)    | 1,520 (1,020 – 2,160)    | 3,770 (2,980 – 4,500)      | 71.3%                        | 17.9                                 | 16.9 | 16.3 |
|                                     | 5th             | 3,030 (2,630 – 3,460)                             | 2,020 (1,760 – 2,310)    | 936 (629 – 1,380)        | 2,090 (1,550 – 2,590)      | 69.0%                        | 10.3                                 | 9.9  | 10.1 |
| Brazil                              | 1st             | 70,100 (60,100 – 80,800)                          | 38,300 (32,800 – 44,500) | 13,600 (10,400 – 17,500) | 56,500 (46,700 – 66,700)   | 80.6%                        | 29.3                                 | 30.1 | 30.5 |
|                                     | 2nd             | 55,200 (48,500 – 62,000)                          | 29,300 (25,600 – 33,100) | 10,100 (7,980 – 12,700)  | 45,000 (38,200 – 52,000)   | 81.6%                        | 23.0                                 | 23.0 | 22.7 |
|                                     | 3rd             | 47,900 (43,100 – 52,800)                          | 24,900 (22,200 – 27,600) | 8,750 (7,020 – 10,800)   | 39,200 (34,100 – 44,100)   | 81.8%                        | 20.0                                 | 19.6 | 19.6 |
|                                     | 4th             | 39,300 (33,500 – 45,300)                          | 20,400 (17,400 – 23,600) | 6,920 (5,250 – 8,940)    | 32,300 (26,600 – 38,400)   | 82.3%                        | 16.4                                 | 16.0 | 15.5 |
|                                     | 5th             | 27,100 (20,700 – 34,900)                          | 14,300 (10,800 – 18,400) | 5,150 (3,590 – 7,180)    | 22,000 (16,300 – 28,800)   | 81.1%                        | 11.3                                 | 11.2 | 11.6 |
| Burkina Faso                        | 1st             | 16,600 (14,900 – 18,300)                          | 19,400 (17,500 – 21,300) | 14,200 (10,800 – 18,700) | 2,360 (-2,210 – 5,990)     | 14.2%                        | 21.0                                 | 21.0 | 23.9 |
|                                     | 2nd             | 17,600 (16,000 – 19,300)                          | 21,100 (19,200 – 23,200) | 13,800 (10,500 – 18,100) | 3,770 (-592 – 7,340)       | 21.5%                        | 22.2                                 | 22.9 | 23.1 |
|                                     | 3rd             | 17,000 (15,700 – 18,500)                          | 19,700 (18,200 – 21,400) | 12,500 (9,610 – 16,200)  | 4,500 (826 – 7,540)        | 26.4%                        | 21.5                                 | 21.4 | 21.0 |
|                                     | 4th             | 16,200 (14,700 – 17,900)                          | 18,600 (16,800 – 20,600) | 10,700 (8,120 – 14,000)  | 5,520 (2,020 – 8,460)      | 34.0%                        | 20.5                                 | 20.2 | 17.9 |
|                                     | 5th             | 11,700 (10,400 – 13,000)                          | 13,400 (12,000 – 15,000) | 8,380 (6,200 – 11,200)   | 3,290 (358 – 5,720)        | 28.2%                        | 14.8                                 | 14.6 | 14.1 |
| Burundi                             | 1st             | 10,700 (9,070 – 12,600)                           | 9,980 (8,560 – 11,700)   | 8,130 (6,080 – 10,700)   | 2,590 (-149 – 5,070)       | 24.2%                        | 24.1                                 | 24.7 | 26.3 |
|                                     | 2nd             | 9,920 (8,580 – 11,300)                            | 8,990 (7,880 – 10,300)   | 7,060 (5,420 – 9,200)    | 2,860 (431 – 4,880)        | 28.8%                        | 22.3                                 | 22.2 | 22.9 |
|                                     | 3rd             | 9,380 (8,290 – 10,500)                            | 8,540 (7,600 – 9,590)    | 6,370 (4,960 – 8,160)    | 3,000 (978 – 4,700)        | 32.0%                        | 21.1                                 | 21.1 | 20.7 |
|                                     | 4th             | 8,600 (7,360 – 9,950)                             | 7,640 (6,610 – 8,760)    | 5,340 (4,070 – 6,950)    | 3,260 (1,300 – 5,000)      | 37.9%                        | 19.3                                 | 18.9 | 17.3 |
|                                     | 5th             | 5,910 (4,760 – 7,250)                             | 5,340 (4,400 – 6,500)    | 3,960 (2,890 – 5,380)    | 1,940 (419 – 3,330)        | 32.8%                        | 13.3                                 | 13.2 | 12.8 |
| Cambodia                            | 1st             | 11,200 (9,830 – 12,700)                           | 9,380 (8,340 – 10,500)   | 3,130 (1,920 – 5,090)    | 8,070 (5,740 – 9,920)      | 72.1%                        | 25.4                                 | 25.8 | 28.0 |
|                                     | 2nd             | 10,200 (9,120 – 11,400)                           | 8,420 (7,500 – 9,360)    | 2,670 (1,640 – 4,300)    | 7,580 (5,610 – 9,090)      | 74.0%                        | 23.2                                 | 23.2 | 23.9 |
|                                     | 3rd             | 9,660 (8,800 – 10,600)                            | 7,980 (7,220 – 8,780)    | 2,330 (1,440 – 3,760)    | 7,330 (5,720 – 8,560)      | 75.9%                        | 21.9                                 | 21.9 | 20.8 |
|                                     | 4th             | 8,400 (7,380 – 9,500)                             | 6,830 (6,030 – 7,710)    | 1,930 (1,180 – 3,120)    | 6,470 (4,900 – 7,760)      | 77.0%                        | 19.0                                 | 18.8 | 17.2 |
|                                     | 5th             | 4,640 (3,840 – 5,540)                             | 3,760 (3,170 – 4,430)    | 1,140 (684 – 1,910)      | 3,500 (2,490 – 4,420)      | 75.5%                        | 10.5                                 | 10.3 | 10.1 |
| Cameroon                            | 1st             | 18,700 (16,600 – 20,900)                          | 24,900 (22,300 – 27,900) | 17,700 (13,300 – 23,500) | 949 (-4,930 – 5,530)       | 5.1%                         | 25.9                                 | 24.8 | 26.7 |
|                                     | 2nd             | 16,300 (14,600 – 18,100)                          | 22,700 (20,300 – 25,100) | 15,000 (11,400 – 19,600) | 1,260 (-3,410 – 5,100)     | 7.7%                         | 22.6                                 | 22.6 | 22.7 |
|                                     | 3rd             | 14,800 (13,400 – 16,200)                          | 20,600 (18,700 – 22,700) | 13,500 (10,400 – 17,400) | 1,260 (-2,740 – 4,480)     | 8.5%                         | 20.5                                 | 20.5 | 20.4 |
|                                     | 4th             | 12,900 (11,500 – 14,500)                          | 18,900 (16,900 – 21,100) | 11,400 (8,560 – 15,000)  | 1,500 (-2,280 – 4,540)     | 11.7%                        | 17.9                                 | 18.8 | 17.2 |
|                                     | 5th             | 9,370 (8,140 – 10,700)                            | 13,300 (11,700 – 15,100) | 8,650 (6,360 – 11,700)   | 722 (-2,450 – 3,140)       | 7.7%                         | 13.0                                 | 13.2 | 13.1 |
| Central African Republic            | 1st             | 4,680 (4,090 – 5,360)                             | 5,900 (5,130 – 6,750)    | 5,060 (3,240 – 7,970)    | -377 (-3,380 – 1,590)      | -8.0%                        | 22.9                                 | 23.7 | 25.0 |
|                                     | 2nd             | 4,750 (4,190 – 5,380)                             | 5,730 (5,000 – 6,520)    | 4,570 (2,940 – 7,140)    | 181 (-2,460 – 1,930)       | 3.8%                         | 23.2                                 | 23.0 | 22.5 |
|                                     | 3rd             | 4,380 (3,890 – 4,910)                             | 5,290 (4,680 – 5,960)    | 4,280 (2,760 – 6,680)    | 103 (-2,320 – 1,710)       | 2.4%                         | 21.4                                 | 21.3 | 21.1 |
|                                     | 4th             | 3,830 (3,350 – 4,380)                             | 4,590 (4,000 – 5,280)    | 3,640 (2,300 – 5,700)    | 193 (-1,910 – 1,630)       | 5.0%                         | 18.8                                 | 18.5 | 18.0 |
|                                     | 5th             | 2,780 (2,380 – 3,250)                             | 3,360 (2,860 – 3,930)    | 2,720 (1,680 – 4,340)    | 61 (-1,600 – 1,150)        | 2.2%                         | 13.6                                 | 13.5 | 13.4 |

Continued on next page

Absolute decline: wealth quintile-specific under-5 deaths (1990) - wealth quintile-specific under-5 deaths (2016).

Percentage decline: absolute decline over wealth quintile-specific under-5 deaths (1990) × 100.

Share of total death (in percentage): wealth quintile-specific under-5 deaths over the total under-5 deaths × 100.

Table 9 – continued from previous page

|                                  | Wealth Quintile | number of wealth quintile-specific under-5 deaths |                          |                           |                            |                              | Share of total death (in percentage) |      |      |
|----------------------------------|-----------------|---------------------------------------------------|--------------------------|---------------------------|----------------------------|------------------------------|--------------------------------------|------|------|
|                                  |                 | 1990                                              | 2000                     | 2016                      | Absolute decline 1990–2016 | Percentage decline 1990–2016 | 1990                                 | 2000 | 2016 |
| Chad                             | 1st             | 10,100 (8,960 – 11,400)                           | 12,700 (11,400 – 14,200) | 15,200 (12,300 – 18,600)  | -5,090 (-8,590 – -2,000)   | -50.3%                       | 16.9                                 | 17.2 | 19.8 |
|                                  | 2nd             | 13,700 (12,400 – 15,200)                          | 16,500 (14,900 – 18,200) | 17,000 (13,800 – 20,500)  | -3,300 (-6,900 – 146)      | -24.0%                       | 22.9                                 | 22.3 | 22.2 |
|                                  | 3rd             | 12,800 (11,700 – 14,000)                          | 15,800 (14,500 – 17,200) | 16,100 (13,300 – 19,200)  | -3,310 (-6,380 – -352)     | -25.9%                       | 21.4                                 | 21.3 | 21.0 |
|                                  | 4th             | 12,300 (11,000 – 13,700)                          | 15,400 (13,900 – 17,000) | 14,400 (11,600 – 17,500)  | -2,140 (-5,350 – 819)      | -17.4%                       | 20.5                                 | 20.7 | 18.8 |
|                                  | 5th             | 11,000 (9,720 – 12,300)                           | 13,700 (12,300 – 15,300) | 14,000 (11,200 – 17,000)  | -2,980 (-6,210 – 113)      | -27.1%                       | 18.3                                 | 18.5 | 18.2 |
| Colombia                         | 1st             | 8,530 (7,470 – 9,640)                             | 5,840 (5,140 – 6,600)    | 3,200 (2,410 – 4,210)     | 5,330 (3,940 – 6,610)      | 62.5%                        | 26.9                                 | 27.5 | 28.1 |
|                                  | 2nd             | 7,240 (6,410 – 8,110)                             | 4,820 (4,280 – 5,410)    | 2,610 (1,960 – 3,440)     | 4,620 (3,510 – 5,660)      | 63.9%                        | 22.8                                 | 22.7 | 22.9 |
|                                  | 3rd             | 6,320 (5,710 – 6,980)                             | 4,200 (3,780 – 4,670)    | 2,250 (1,700 – 2,920)     | 4,070 (3,260 – 4,860)      | 64.4%                        | 20.0                                 | 19.8 | 19.7 |
|                                  | 4th             | 5,210 (4,540 – 5,960)                             | 3,380 (2,920 – 3,890)    | 1,750 (1,280 – 2,340)     | 3,460 (2,620 – 4,300)      | 66.4%                        | 16.5                                 | 16.0 | 15.4 |
|                                  | 5th             | 4,380 (3,630 – 5,230)                             | 2,970 (2,480 – 3,520)    | 1,570 (1,130 – 2,140)     | 2,800 (2,020 – 3,630)      | 64.0%                        | 13.8                                 | 14.0 | 13.8 |
| Comoros                          | 1st             | 506 (420 – 601)                                   | 493 (382 – 606)          | 462 (243 – 908)           | 44 (-415 – 276)            | 8.7%                         | 23.7                                 | 24.3 | 24.6 |
|                                  | 2nd             | 481 (410 – 554)                                   | 455 (360 – 548)          | 425 (224 – 838)           | 56 (-371 – 266)            | 11.6%                        | 22.5                                 | 22.4 | 22.6 |
|                                  | 3rd             | 453 (395 – 513)                                   | 428 (341 – 509)          | 388 (206 – 758)           | 65 (-312 – 253)            | 14.3%                        | 21.2                                 | 21.1 | 20.6 |
|                                  | 4th             | 387 (327 – 449)                                   | 355 (276 – 432)          | 326 (170 – 647)           | 61 (-265 – 223)            | 15.8%                        | 18.1                                 | 17.5 | 17.3 |
|                                  | 5th             | 312 (250 – 387)                                   | 301 (226 – 387)          | 279 (144 – 562)           | 33 (-253 – 175)            | 10.6%                        | 14.6                                 | 14.8 | 14.8 |
| Congo                            | 1st             | 1,850 (1,540 – 2,210)                             | 3,060 (2,640 – 3,550)    | 2,210 (1,530 – 3,070)     | -357 (-1,260 – 395)        | -19.3%                       | 22.6                                 | 21.7 | 23.4 |
|                                  | 2nd             | 1,890 (1,610 – 2,220)                             | 3,240 (2,820 – 3,710)    | 2,240 (1,570 – 3,070)     | -349 (-1,210 – 383)        | -18.5%                       | 23.0                                 | 22.9 | 23.7 |
|                                  | 3rd             | 1,750 (1,510 – 2,010)                             | 3,050 (2,700 – 3,440)    | 1,960 (1,390 – 2,680)     | -214 (-963 – 412)          | -12.2%                       | 21.3                                 | 21.5 | 20.7 |
|                                  | 4th             | 1,480 (1,250 – 1,760)                             | 2,630 (2,280 – 3,030)    | 1,660 (1,150 – 2,320)     | -173 (-856 – 376)          | -11.7%                       | 18.1                                 | 18.6 | 17.5 |
|                                  | 5th             | 1,230 (977 – 1,550)                               | 2,160 (1,770 – 2,610)    | 1,400 (943 – 2,000)       | -167 (-754 – 328)          | -13.6%                       | 15.0                                 | 15.3 | 14.8 |
| Cote d'Ivoire                    | 1st             | 18,500 (16,500 – 20,700)                          | 22,700 (19,900 – 25,700) | 19,300 (14,000 – 25,900)  | -757 (-7,430 – 4,780)      | -4.1%                        | 24.1                                 | 23.8 | 24.8 |
|                                  | 2nd             | 17,500 (15,800 – 19,400)                          | 21,900 (19,500 – 24,500) | 17,700 (12,900 – 23,700)  | -150 (-6,150 – 4,750)      | -0.9%                        | 22.8                                 | 23.0 | 22.7 |
|                                  | 3rd             | 15,800 (14,500 – 17,300)                          | 19,700 (17,800 – 21,800) | 16,100 (11,900 – 21,300)  | -276 (-5,480 – 3,930)      | -1.7%                        | 20.6                                 | 20.7 | 20.7 |
|                                  | 4th             | 14,600 (13,100 – 16,300)                          | 18,000 (16,000 – 20,300) | 13,900 (10,200 – 18,700)  | 750 (-4,150 – 4,730)       | 5.1%                         | 19.0                                 | 18.9 | 17.8 |
|                                  | 5th             | 10,300 (8,970 – 11,700)                           | 12,900 (11,200 – 14,900) | 10,800 (7,720 – 14,900)   | -526 (-4,530 – 2,570)      | -5.1%                        | 13.4                                 | 13.6 | 13.9 |
| Democratic Republic of the Congo | 1st             | 65,600 (56,400 – 75,900)                          | 79,000 (69,200 – 90,100) | 75,900 (53,300 – 106,000) | -10,300 (-41,300 – 13,600) | -15.7%                       | 23.5                                 | 23.8 | 25.0 |
|                                  | 2nd             | 64,000 (56,100 – 72,600)                          | 75,800 (67,300 – 85,800) | 70,100 (49,500 – 97,500)  | -6,130 (-34,400 – 15,500)  | -9.6%                        | 22.9                                 | 22.9 | 23.0 |
|                                  | 3rd             | 59,800 (53,600 – 66,800)                          | 70,900 (63,500 – 79,300) | 64,900 (46,500 – 89,700)  | -5,010 (-30,000 – 14,200)  | -8.4%                        | 21.4                                 | 21.4 | 21.3 |
|                                  | 4th             | 56,500 (49,000 – 64,700)                          | 65,800 (57,900 – 74,900) | 55,400 (39,300 – 77,400)  | 1,090 (-21,500 – 18,500)   | 1.9%                         | 20.2                                 | 19.9 | 18.2 |
|                                  | 5th             | 33,800 (28,200 – 40,600)                          | 40,000 (34,200 – 46,700) | 37,900 (26,200 – 54,200)  | -4,020 (-20,300 – 8,130)   | -11.9%                       | 12.1                                 | 12.1 | 12.4 |
| Dominican Republic               | 1st             | 3,290 (2,880 – 3,740)                             | 2,340 (2,060 – 2,640)    | 1,720 (1,280 – 2,350)     | 1,570 (873 – 2,180)        | 47.7%                        | 26.0                                 | 26.7 | 26.1 |
|                                  | 2nd             | 2,970 (2,650 – 3,320)                             | 2,030 (1,800 – 2,270)    | 1,540 (1,150 – 2,070)     | 1,430 (831 – 1,930)        | 48.2%                        | 23.4                                 | 23.1 | 23.3 |
|                                  | 3rd             | 2,610 (2,380 – 2,860)                             | 1,780 (1,600 – 1,960)    | 1,340 (1,010 – 1,780)     | 1,270 (801 – 1,670)        | 48.7%                        | 20.5                                 | 20.3 | 20.3 |
|                                  | 4th             | 2,210 (1,940 – 2,520)                             | 1,500 (1,310 – 1,710)    | 1,140 (842 – 1,550)       | 1,070 (596 – 1,480)        | 48.4%                        | 17.4                                 | 17.1 | 17.2 |
|                                  | 5th             | 1,610 (1,310 – 1,960)                             | 1,120 (919 – 1,350)      | 864 (615 – 1,220)         | 744 (354 – 1,100)          | 46.3%                        | 12.7                                 | 12.8 | 13.1 |
| Egypt                            | 1st             | 47,200 (42,900 – 51,700)                          | 24,000 (21,800 – 26,400) | 16,700 (12,600 – 21,700)  | 30,500 (24,200 – 36,400)   | 64.7%                        | 28.7                                 | 29.3 | 29.0 |
|                                  | 2nd             | 37,700 (34,300 – 41,100)                          | 18,500 (16,800 – 20,300) | 13,100 (10,000 – 17,100)  | 24,600 (19,600 – 29,100)   | 65.3%                        | 22.9                                 | 22.6 | 22.8 |
|                                  | 3rd             | 33,900 (31,500 – 36,400)                          | 16,400 (15,100 – 17,800) | 11,500 (8,920 – 14,800)   | 22,400 (18,500 – 25,800)   | 66.1%                        | 20.6                                 | 20.0 | 20.0 |
|                                  | 4th             | 28,200 (25,300 – 31,400)                          | 14,300 (12,800 – 15,900) | 9,680 (7,330 – 12,900)    | 18,500 (14,300 – 22,400)   | 65.6%                        | 17.1                                 | 17.5 | 16.9 |
|                                  | 5th             | 17,600 (15,000 – 20,400)                          | 8,740 (7,590 – 10,000)   | 6,520 (4,840 – 8,750)     | 11,000 (7,870 – 14,100)    | 62.6%                        | 10.7                                 | 10.7 | 11.4 |
| El Salvador                      | 1st             | 2,500 (2,050 – 3,000)                             | 1,290 (1,050 – 1,560)    | 494 (326 – 742)           | 2,000 (1,530 – 2,490)      | 80.1%                        | 25.7                                 | 26.7 | 27.9 |
|                                  | 2nd             | 2,260 (1,960 – 2,610)                             | 1,120 (955 – 1,310)      | 405 (273 – 601)           | 1,850 (1,500 – 2,210)      | 81.9%                        | 23.2                                 | 23.2 | 22.9 |
|                                  | 3rd             | 1,980 (1,760 – 2,230)                             | 966 (841 – 1,100)        | 352 (239 – 517)           | 1,630 (1,360 – 1,890)      | 82.1%                        | 20.4                                 | 20.0 | 19.9 |
|                                  | 4th             | 1,670 (1,410 – 1,960)                             | 808 (668 – 957)          | 279 (183 – 419)           | 1,390 (1,110 – 1,680)      | 83.3%                        | 17.2                                 | 16.7 | 15.8 |
|                                  | 5th             | 1,310 (970 – 1,740)                               | 647 (473 – 864)          | 237 (146 – 377)           | 1,080 (753 – 1,460)        | 82.2%                        | 13.5                                 | 13.4 | 13.4 |

Continued on next page

Absolute decline: wealth quintile-specific under-5 deaths (1990) - wealth quintile-specific under-5 deaths (2016).

Percentage decline: absolute decline over wealth quintile-specific under-5 deaths (1990) × 100.

Share of total death (in percentage): wealth quintile-specific under-5 deaths over the total under-5 deaths × 100.



Table 9 – continued from previous page

|                   | Wealth Quintile | number of wealth quintile-specific under-5 deaths |                          |                          |                            |                              | Share of total death (in percentage) |      |      |
|-------------------|-----------------|---------------------------------------------------|--------------------------|--------------------------|----------------------------|------------------------------|--------------------------------------|------|------|
|                   |                 | 1990                                              | 2000                     | 2016                     | Absolute decline 1990–2016 | Percentage decline 1990–2016 | 1990                                 | 2000 | 2016 |
| Equatorial Guinea | 1st             | 704 (572 – 862)                                   | 809 (681 – 962)          | 875 (579 – 1,310)        | -171 (-613 – 156)          | -24.3%                       | 21.7                                 | 22.4 | 24.0 |
|                   | 2nd             | 680 (563 – 811)                                   | 755 (651 – 882)          | 784 (518 – 1,160)        | -104 (-485 – 191)          | -15.3%                       | 20.9                                 | 20.9 | 21.5 |
|                   | 3rd             | 650 (551 – 764)                                   | 722 (634 – 832)          | 729 (485 – 1,060)        | -79 (-431 – 192)           | -12.1%                       | 20.0                                 | 20.0 | 20.0 |
|                   | 4th             | 624 (514 – 750)                                   | 674 (572 – 798)          | 624 (411 – 931)          | 0 (-320 – 244)             | 0.0%                         | 19.2                                 | 18.6 | 17.1 |
|                   | 5th             | 589 (466 – 738)                                   | 656 (537 – 806)          | 637 (403 – 976)          | -48 (-380 – 201)           | -8.2%                        | 18.1                                 | 18.1 | 17.4 |
| Eritrea           | 1st             | 3,760 (3,150 – 4,460)                             | 2,190 (1,860 – 2,570)    | 1,660 (1,030 – 2,670)    | 2,110 (998 – 2,970)        | 56.1%                        | 20.0                                 | 21.1 | 23.4 |
|                   | 2nd             | 4,490 (3,910 – 5,110)                             | 2,510 (2,190 – 2,860)    | 1,740 (1,100 – 2,780)    | 2,740 (1,610 – 3,600)      | 61.1%                        | 23.8                                 | 24.1 | 24.7 |
|                   | 3rd             | 4,220 (3,760 – 4,710)                             | 2,340 (2,070 – 2,620)    | 1,510 (961 – 2,400)      | 2,700 (1,740 – 3,410)      | 64.0%                        | 22.4                                 | 22.5 | 21.4 |
|                   | 4th             | 3,920 (3,380 – 4,530)                             | 2,020 (1,740 – 2,330)    | 1,280 (800 – 2,050)      | 2,640 (1,740 – 3,380)      | 67.3%                        | 20.8                                 | 19.5 | 18.1 |
|                   | 5th             | 2,440 (1,910 – 3,080)                             | 1,340 (1,050 – 1,670)    | 879 (526 – 1,480)        | 1,560 (907 – 2,160)        | 63.9%                        | 13.0                                 | 12.8 | 12.4 |
| Ethiopia          | 1st             | 82,800 (71,900 – 94,900)                          | 78,900 (70,500 – 88,100) | 43,000 (33,000 – 55,200) | 39,700 (23,900 – 54,400)   | 48.0%                        | 18.7                                 | 19.5 | 23.0 |
|                   | 2nd             | 97,300 (86,600 – 109,000)                         | 87,600 (78,800 – 96,800) | 43,400 (33,800 – 55,400) | 54,000 (38,600 – 68,400)   | 55.5%                        | 22.1                                 | 21.7 | 23.2 |
|                   | 3rd             | 95,400 (86,800 – 104,000)                         | 87,400 (79,800 – 95,500) | 38,800 (30,500 – 48,900) | 56,600 (44,300 – 67,900)   | 59.3%                        | 21.6                                 | 21.6 | 20.8 |
|                   | 4th             | 95,900 (84,500 – 108,000)                         | 86,200 (77,500 – 95,600) | 33,800 (25,900 – 43,200) | 62,100 (48,000 – 75,300)   | 64.8%                        | 21.7                                 | 21.3 | 18.1 |
|                   | 5th             | 70,100 (60,200 – 81,300)                          | 64,100 (56,700 – 71,900) | 27,900 (21,200 – 36,200) | 42,200 (30,200 – 54,300)   | 60.2%                        | 15.9                                 | 15.9 | 14.9 |
| Gabon             | 1st             | 712 (586 – 864)                                   | 764 (635 – 934)          | 656 (439 – 960)          | 57 (-263 – 318)            | 8.0%                         | 22.6                                 | 22.5 | 24.3 |
|                   | 2nd             | 745 (626 – 885)                                   | 808 (681 – 970)          | 647 (438 – 944)          | 98 (-209 – 356)            | 13.2%                        | 23.6                                 | 23.8 | 23.9 |
|                   | 3rd             | 677 (576 – 795)                                   | 727 (620 – 864)          | 560 (380 – 815)          | 117 (-144 – 337)           | 17.3%                        | 21.5                                 | 21.4 | 20.7 |
|                   | 4th             | 581 (484 – 704)                                   | 625 (523 – 759)          | 470 (316 – 690)          | 110 (-119 – 309)           | 18.9%                        | 18.4                                 | 18.4 | 17.4 |
|                   | 5th             | 441 (338 – 567)                                   | 474 (369 – 607)          | 370 (234 – 563)          | 70 (-118 – 229)            | 15.9%                        | 14.0                                 | 14.0 | 13.7 |
| Gambia            | 1st             | 1,480 (1,230 – 1,760)                             | 1,460 (1,220 – 1,710)    | 1,230 (755 – 1,940)      | 244 (-485 – 776)           | 16.5%                        | 21.9                                 | 23.3 | 24.2 |
|                   | 2nd             | 1,540 (1,320 – 1,770)                             | 1,420 (1,210 – 1,640)    | 1,200 (739 – 1,890)      | 333 (-358 – 835)           | 21.7%                        | 22.8                                 | 22.7 | 23.6 |
|                   | 3rd             | 1,450 (1,270 – 1,640)                             | 1,350 (1,170 – 1,550)    | 1,080 (674 – 1,680)      | 374 (-241 – 816)           | 25.8%                        | 21.5                                 | 21.6 | 21.1 |
|                   | 4th             | 1,360 (1,160 – 1,590)                             | 1,180 (996 – 1,380)      | 928 (571 – 1,470)        | 429 (-133 – 836)           | 31.6%                        | 20.1                                 | 18.9 | 18.2 |
|                   | 5th             | 914 (742 – 1,120)                                 | 840 (683 – 1,020)        | 660 (401 – 1,070)        | 254 (-149 – 555)           | 27.8%                        | 13.6                                 | 13.5 | 12.9 |
| Georgia           | 1st             | 1,110 (904 – 1,350)                               | 530 (430 – 644)          | 158 (126 – 197)          | 955 (756 – 1,180)          | 85.8%                        | 25.6                                 | 25.7 | 27.1 |
|                   | 2nd             | 1,040 (890 – 1,210)                               | 498 (422 – 585)          | 137 (114 – 166)          | 907 (752 – 1,070)          | 86.8%                        | 24.0                                 | 24.2 | 23.5 |
|                   | 3rd             | 894 (775 – 1,020)                                 | 420 (362 – 486)          | 118 (100 – 140)          | 776 (658 – 898)            | 86.8%                        | 20.5                                 | 20.4 | 20.2 |
|                   | 4th             | 744 (616 – 886)                                   | 348 (290 – 418)          | 94 (75 – 117)            | 650 (523 – 788)            | 87.4%                        | 17.1                                 | 16.9 | 16.1 |
|                   | 5th             | 561 (412 – 751)                                   | 264 (194 – 358)          | 76 (54 – 104)            | 485 (348 – 659)            | 86.4%                        | 12.9                                 | 12.8 | 13.0 |
| Ghana             | 1st             | 17,100 (15,500 – 18,900)                          | 16,400 (14,800 – 18,100) | 13,100 (9,750 – 17,500)  | 3,990 (-575 – 7,750)       | 23.3%                        | 24.6                                 | 25.1 | 25.9 |
|                   | 2nd             | 15,500 (14,100 – 17,000)                          | 14,000 (12,700 – 15,400) | 11,200 (8,360 – 14,600)  | 4,320 (743 – 7,500)        | 27.8%                        | 22.3                                 | 21.4 | 22.1 |
|                   | 3rd             | 14,500 (13,400 – 15,700)                          | 13,500 (12,500 – 14,700) | 10,100 (7,670 – 13,300)  | 4,330 (1,160 – 6,950)      | 29.9%                        | 20.8                                 | 20.7 | 20.0 |
|                   | 4th             | 12,800 (11,500 – 14,300)                          | 11,800 (10,600 – 13,100) | 8,740 (6,490 – 11,700)   | 4,100 (1,110 – 6,670)      | 31.9%                        | 18.4                                 | 18.0 | 17.3 |
|                   | 5th             | 9,790 (8,510 – 11,200)                            | 9,620 (8,440 – 11,000)   | 7,430 (5,410 – 10,100)   | 2,360 (-350 – 4,610)       | 24.1%                        | 14.0                                 | 14.7 | 14.7 |
| Guatemala         | 1st             | 6,560 (5,760 – 7,410)                             | 5,070 (4,380 – 5,800)    | 3,000 (2,350 – 3,800)    | 3,560 (2,540 – 4,520)      | 54.3%                        | 22.8                                 | 24.0 | 25.3 |
|                   | 2nd             | 6,740 (6,050 – 7,480)                             | 5,100 (4,510 – 5,730)    | 2,870 (2,300 – 3,590)    | 3,880 (2,920 – 4,720)      | 57.5%                        | 23.4                                 | 24.1 | 24.2 |
|                   | 3rd             | 6,180 (5,650 – 6,730)                             | 4,410 (3,960 – 4,880)    | 2,420 (1,980 – 3,010)    | 3,760 (3,050 – 4,400)      | 60.8%                        | 21.5                                 | 20.9 | 20.5 |
|                   | 4th             | 5,290 (4,650 – 5,960)                             | 3,710 (3,200 – 4,240)    | 2,000 (1,590 – 2,530)    | 3,290 (2,510 – 4,000)      | 62.2%                        | 18.4                                 | 17.5 | 16.9 |
|                   | 5th             | 4,030 (3,270 – 4,890)                             | 2,830 (2,270 – 3,470)    | 1,550 (1,160 – 2,070)    | 2,480 (1,780 – 3,220)      | 61.6%                        | 14.0                                 | 13.4 | 13.1 |
| Guinea            | 1st             | 14,600 (12,900 – 16,500)                          | 14,300 (12,900 – 15,800) | 10,000 (7,840 – 12,700)  | 4,620 (1,430 – 7,380)      | 31.5%                        | 23.2                                 | 23.7 | 25.9 |
|                   | 2nd             | 14,200 (12,800 – 15,800)                          | 13,500 (12,200 – 14,800) | 8,720 (6,900 – 11,000)   | 5,480 (2,830 – 7,780)      | 38.6%                        | 22.5                                 | 22.4 | 22.5 |
|                   | 3rd             | 13,200 (12,100 – 14,400)                          | 12,600 (11,500 – 13,700) | 8,040 (6,430 – 10,100)   | 5,160 (2,980 – 7,050)      | 39.1%                        | 20.9                                 | 20.8 | 20.7 |
|                   | 4th             | 12,200 (10,800 – 13,700)                          | 11,700 (10,600 – 13,000) | 6,970 (5,480 – 8,880)    | 5,260 (3,020 – 7,300)      | 43.0%                        | 19.4                                 | 19.5 | 18.0 |
|                   | 5th             | 8,730 (7,540 – 10,100)                            | 8,150 (7,190 – 9,230)    | 5,050 (3,900 – 6,520)    | 3,680 (1,940 – 5,320)      | 42.2%                        | 13.9                                 | 13.5 | 13.0 |

Continued on next page

Absolute decline: wealth quintile-specific under-5 deaths (1990) - wealth quintile-specific under-5 deaths (2016).

Percentage decline: absolute decline over wealth quintile-specific under-5 deaths (1990) × 100.

Share of total death (in percentage): wealth quintile-specific under-5 deaths over the total under-5 deaths × 100.

Table 9 – continued from previous page

|               | Wealth Quintile | number of wealth quintile-specific under-5 deaths |                             |                             |                             |                              | Share of total death (in percentage) |      |      |
|---------------|-----------------|---------------------------------------------------|-----------------------------|-----------------------------|-----------------------------|------------------------------|--------------------------------------|------|------|
|               |                 | 1990                                              | 2000                        | 2016                        | Absolute decline 1990–2016  | Percentage decline 1990–2016 | 1990                                 | 2000 | 2016 |
| Guinea-Bissau | 1st             | 2,190 (1,860 – 2,550)                             | 1,930 (1,670 – 2,210)       | 1,360 (930 – 1,920)         | 829 (218 – 1,370)           | 37.9%                        | 22.0                                 | 22.1 | 23.8 |
|               | 2nd             | 2,310 (2,010 – 2,650)                             | 2,050 (1,800 – 2,330)       | 1,320 (903 – 1,870)         | 990 (392 – 1,510)           | 42.9%                        | 23.2                                 | 23.5 | 23.1 |
|               | 3rd             | 2,110 (1,850 – 2,370)                             | 1,840 (1,640 – 2,070)       | 1,200 (829 – 1,680)         | 907 (393 – 1,340)           | 43.1%                        | 21.2                                 | 21.1 | 21.0 |
|               | 4th             | 1,940 (1,660 – 2,240)                             | 1,650 (1,440 – 1,890)       | 1,020 (697 – 1,430)         | 921 (436 – 1,340)           | 47.5%                        | 19.5                                 | 18.9 | 17.8 |
|               | 5th             | 1,410 (1,180 – 1,680)                             | 1,250 (1,070 – 1,460)       | 818 (552 – 1,180)           | 591 (204 – 940)             | 42.0%                        | 14.2                                 | 14.3 | 14.3 |
| Guyana        | 1st             | 292 (241 – 350)                                   | 209 (171 – 248)             | 120 (79 – 184)              | 172 (97 – 236)              | 58.9%                        | 22.8                                 | 22.9 | 23.4 |
|               | 2nd             | 303 (261 – 349)                                   | 218 (187 – 251)             | 122 (82 – 184)              | 181 (109 – 242)             | 59.8%                        | 23.6                                 | 23.8 | 23.7 |
|               | 3rd             | 266 (235 – 301)                                   | 188 (166 – 214)             | 105 (71 – 157)              | 162 (103 – 209)             | 60.8%                        | 20.8                                 | 20.6 | 20.4 |
|               | 4th             | 225 (191 – 265)                                   | 159 (134 – 186)             | 88 (59 – 135)               | 137 (81 – 184)              | 60.8%                        | 17.6                                 | 17.4 | 17.2 |
|               | 5th             | 196 (150 – 253)                                   | 140 (108 – 180)             | 78 (49 – 124)               | 117 (65 – 169)              | 59.8%                        | 15.3                                 | 15.3 | 15.2 |
| Haiti         | 1st             | 8,240 (7,320 – 9,300)                             | 6,340 (5,620 – 7,140)       | 4,150 (3,130 – 5,550)       | 4,100 (2,560 – 5,410)       | 49.8%                        | 21.8                                 | 23.0 | 23.7 |
|               | 2nd             | 8,570 (7,710 – 9,500)                             | 6,280 (5,590 – 7,000)       | 4,060 (3,100 – 5,400)       | 4,510 (3,040 – 5,780)       | 52.6%                        | 22.7                                 | 22.8 | 23.2 |
|               | 3rd             | 8,050 (7,380 – 8,780)                             | 5,850 (5,290 – 6,420)       | 3,640 (2,800 – 4,760)       | 4,420 (3,170 – 5,430)       | 54.9%                        | 21.3                                 | 21.3 | 20.8 |
|               | 4th             | 7,330 (6,480 – 8,240)                             | 5,050 (4,460 – 5,670)       | 3,160 (2,410 – 4,230)       | 4,160 (2,900 – 5,280)       | 56.8%                        | 19.4                                 | 18.3 | 18.1 |
|               | 5th             | 5,580 (4,790 – 6,490)                             | 3,990 (3,410 – 4,630)       | 2,480 (1,820 – 3,360)       | 3,100 (2,070 – 4,090)       | 55.5%                        | 14.8                                 | 14.5 | 14.2 |
| Honduras      | 1st             | 2,990 (2,540 – 3,460)                             | 2,260 (1,960 – 2,580)       | 1,080 (777 – 1,480)         | 1,910 (1,360 – 2,430)       | 63.9%                        | 27.5                                 | 28.7 | 29.2 |
|               | 2nd             | 2,510 (2,200 – 2,840)                             | 1,810 (1,590 – 2,040)       | 835 (608 – 1,130)           | 1,670 (1,260 – 2,050)       | 66.6%                        | 23.1                                 | 23.0 | 22.6 |
|               | 3rd             | 2,210 (1,970 – 2,440)                             | 1,570 (1,400 – 1,740)       | 734 (537 – 992)             | 1,470 (1,160 – 1,740)       | 66.6%                        | 20.3                                 | 20.0 | 19.9 |
|               | 4th             | 1,840 (1,570 – 2,120)                             | 1,290 (1,110 – 1,480)       | 593 (423 – 822)             | 1,250 (922 – 1,550)         | 68.0%                        | 16.9                                 | 16.4 | 16.0 |
|               | 5th             | 1,330 (1,050 – 1,650)                             | 942 (752 – 1,160)           | 452 (307 – 645)             | 874 (597 – 1,170)           | 65.9%                        | 12.2                                 | 12.0 | 12.2 |
| India         | 1st             | 915,000 (863,000 – 969,000)                       | 693,000 (645,000 – 742,000) | 308,000 (262,000 – 356,000) | 608,000 (538,000 – 678,000) | 66.4%                        | 27.0                                 | 27.5 | 28.5 |
|               | 2nd             | 865,000 (813,000 – 917,000)                       | 633,000 (589,000 – 678,000) | 266,000 (229,000 – 303,000) | 599,000 (537,000 – 662,000) | 69.3%                        | 25.5                                 | 25.1 | 24.6 |
|               | 3rd             | 716,000 (679,000 – 756,000)                       | 532,000 (500,000 – 565,000) | 221,000 (195,000 – 247,000) | 495,000 (453,000 – 541,000) | 69.1%                        | 21.1                                 | 21.1 | 20.5 |
|               | 4th             | 567,000 (530,000 – 605,000)                       | 408,000 (376,000 – 443,000) | 176,000 (149,000 – 204,000) | 391,000 (344,000 – 437,000) | 69.0%                        | 16.7                                 | 16.2 | 16.3 |
|               | 5th             | 332,000 (309,000 – 358,000)                       | 255,000 (233,000 – 280,000) | 111,000 (91,300 – 135,000)  | 222,000 (189,000 – 252,000) | 66.8%                        | 9.8                                  | 10.1 | 10.3 |
| Indonesia     | 1st             | 112,000 (99,700 – 125,000)                        | 69,900 (63,000 – 77,400)    | 39,000 (30,200 – 50,300)    | 72,500 (57,200 – 87,600)    | 65.0%                        | 28.3                                 | 29.5 | 29.8 |
|               | 2nd             | 88,400 (79,700 – 97,200)                          | 54,100 (48,600 – 59,600)    | 29,600 (22,900 – 38,000)    | 58,800 (47,000 – 68,800)    | 66.5%                        | 22.4                                 | 22.8 | 22.6 |
|               | 3rd             | 81,700 (75,300 – 88,200)                          | 47,800 (43,800 – 51,800)    | 26,000 (20,400 – 33,200)    | 55,600 (46,800 – 63,400)    | 68.1%                        | 20.7                                 | 20.2 | 19.9 |
|               | 4th             | 68,700 (60,700 – 76,900)                          | 39,500 (34,900 – 44,400)    | 21,600 (16,500 – 28,200)    | 47,100 (37,600 – 56,500)    | 68.6%                        | 17.4                                 | 16.7 | 16.5 |
|               | 5th             | 44,200 (36,800 – 52,900)                          | 25,700 (21,700 – 30,400)    | 14,700 (10,800 – 19,700)    | 29,500 (21,900 – 37,700)    | 66.7%                        | 11.2                                 | 10.8 | 11.2 |
| Iraq          | 1st             | 8,140 (6,800 – 9,600)                             | 8,540 (7,290 – 9,980)       | 8,880 (6,440 – 12,400)      | -736 (-4,260 – 1,880)       | -9.0%                        | 23.3                                 | 23.2 | 23.6 |
|               | 2nd             | 7,920 (6,870 – 9,070)                             | 8,280 (7,180 – 9,480)       | 8,410 (6,180 – 11,500)      | -485 (-3,600 – 1,890)       | -6.1%                        | 22.6                                 | 22.5 | 22.3 |
|               | 3rd             | 6,970 (6,180 – 7,800)                             | 7,270 (6,440 – 8,150)       | 7,400 (5,460 – 10,100)      | -422 (-3,110 – 1,540)       | -6.1%                        | 19.9                                 | 19.8 | 19.6 |
|               | 4th             | 5,990 (5,090 – 6,960)                             | 6,300 (5,360 – 7,310)       | 6,410 (4,680 – 8,930)       | -423 (-2,960 – 1,430)       | -7.1%                        | 17.1                                 | 17.1 | 17.0 |
|               | 5th             | 5,980 (4,780 – 7,410)                             | 6,400 (5,210 – 7,800)       | 6,580 (4,650 – 9,350)       | -594 (-3,200 – 1,400)       | -9.9%                        | 17.1                                 | 17.4 | 17.5 |
| Jordan        | 1st             | 1,110 (969 – 1,270)                               | 1,090 (942 – 1,260)         | 1,110 (768 – 1,570)         | -2 (-471 – 359)             | -0.2%                        | 24.8                                 | 24.9 | 26.1 |
|               | 2nd             | 1,020 (897 – 1,140)                               | 992 (865 – 1,120)           | 968 (680 – 1,360)           | 49 (-356 – 354)             | 4.8%                         | 22.6                                 | 22.6 | 22.7 |
|               | 3rd             | 904 (818 – 995)                                   | 880 (786 – 978)             | 850 (601 – 1,180)           | 54 (-287 – 310)             | 6.0%                         | 20.1                                 | 20.1 | 20.0 |
|               | 4th             | 795 (696 – 905)                                   | 768 (662 – 888)             | 704 (475 – 1,010)           | 91 (-214 – 338)             | 11.5%                        | 17.7                                 | 17.5 | 16.5 |
|               | 5th             | 662 (552 – 792)                                   | 654 (541 – 786)             | 627 (419 – 922)             | 35 (-240 – 250)             | 5.3%                         | 14.8                                 | 14.9 | 14.7 |
| Kazakhstan    | 1st             | 4,960 (4,160 – 5,820)                             | 2,550 (2,140 – 2,970)       | 1,140 (939 – 1,360)         | 3,820 (3,070 – 4,630)       | 77.1%                        | 24.4                                 | 24.6 | 26.2 |
|               | 2nd             | 4,820 (4,160 – 5,520)                             | 2,460 (2,150 – 2,810)       | 1,010 (867 – 1,160)         | 3,810 (3,170 – 4,500)       | 79.0%                        | 23.7                                 | 23.8 | 23.3 |
|               | 3rd             | 4,180 (3,680 – 4,710)                             | 2,120 (1,880 – 2,370)       | 880 (784 – 977)             | 3,300 (2,830 – 3,810)       | 79.0%                        | 20.6                                 | 20.5 | 20.2 |
|               | 4th             | 3,510 (2,990 – 4,070)                             | 1,760 (1,500 – 2,030)       | 703 (570 – 833)             | 2,810 (2,290 – 3,360)       | 80.0%                        | 17.3                                 | 17.0 | 16.1 |
|               | 5th             | 2,870 (2,230 – 3,630)                             | 1,460 (1,150 – 1,830)       | 617 (474 – 786)             | 2,250 (1,680 – 2,930)       | 78.5%                        | 14.1                                 | 14.1 | 14.2 |

Continued on next page

Absolute decline: wealth quintile-specific under-5 deaths (1990) - wealth quintile-specific under-5 deaths (2016).

Percentage decline: absolute decline over wealth quintile-specific under-5 deaths (1990) × 100.

Share of total death (in percentage): wealth quintile-specific under-5 deaths over the total under-5 deaths × 100.

Table 9 – continued from previous page

|                                  | Wealth Quintile | number of wealth quintile-specific under-5 deaths |                          |                          |                            |                              | Share of total death (in percentage) |      |      |
|----------------------------------|-----------------|---------------------------------------------------|--------------------------|--------------------------|----------------------------|------------------------------|--------------------------------------|------|------|
|                                  |                 | 1990                                              | 2000                     | 2016                     | Absolute decline 1990–2016 | Percentage decline 1990–2016 | 1990                                 | 2000 | 2016 |
| Kenya                            | 1st             | 24,300 (21,900 – 27,000)                          | 30,200 (27,100 – 33,500) | 18,100 (14,400 – 22,700) | 6,260 (1,450 – 10,600)     | 25.7%                        | 25.6                                 | 24.9 | 24.6 |
|                                  | 2nd             | 21,700 (19,700 – 23,900)                          | 26,900 (24,300 – 29,800) | 17,000 (13,700 – 21,100) | 4,770 (443 – 8,650)        | 22.0%                        | 22.8                                 | 22.2 | 23.1 |
|                                  | 3rd             | 19,300 (17,700 – 20,900)                          | 24,600 (22,600 – 26,900) | 14,600 (11,900 – 18,000) | 4,680 (1,050 – 7,540)      | 24.3%                        | 20.3                                 | 20.4 | 19.9 |
|                                  | 4th             | 15,800 (14,000 – 17,600)                          | 20,700 (18,600 – 23,100) | 12,800 (10,200 – 16,000) | 2,970 (-615 – 6,020)       | 18.8%                        | 16.6                                 | 17.1 | 17.4 |
|                                  | 5th             | 14,000 (12,300 – 15,800)                          | 18,600 (16,400 – 21,000) | 11,100 (8,700 – 14,100)  | 2,900 (-391 – 5,620)       | 20.7%                        | 14.7                                 | 15.4 | 15.1 |
| Kyrgyzstan                       | 1st             | 2,220 (1,840 – 2,640)                             | 1,360 (1,130 – 1,580)    | 851 (717 – 995)          | 1,370 (1,010 – 1,760)      | 61.6%                        | 25.1                                 | 25.6 | 26.8 |
|                                  | 2nd             | 2,040 (1,750 – 2,370)                             | 1,240 (1,060 – 1,400)    | 730 (638 – 828)          | 1,310 (1,020 – 1,630)      | 64.3%                        | 23.0                                 | 23.3 | 22.9 |
|                                  | 3rd             | 1,820 (1,580 – 2,070)                             | 1,070 (932 – 1,190)      | 635 (572 – 698)          | 1,180 (952 – 1,430)        | 65.0%                        | 20.4                                 | 20.2 | 20.0 |
|                                  | 4th             | 1,530 (1,280 – 1,820)                             | 887 (741 – 1,030)        | 516 (436 – 602)          | 1,010 (762 – 1,290)        | 66.1%                        | 17.2                                 | 16.7 | 16.2 |
|                                  | 5th             | 1,270 (988 – 1,610)                               | 749 (589 – 936)          | 448 (352 – 564)          | 822 (579 – 1,120)          | 64.7%                        | 14.3                                 | 14.1 | 14.1 |
| Lao People's Democratic Republic | 1st             | 6,860 (5,700 – 8,200)                             | 5,170 (4,280 – 6,170)    | 2,810 (1,950 – 3,980)    | 4,050 (2,580 – 5,520)      | 59.0%                        | 24.3                                 | 26.0 | 27.3 |
|                                  | 2nd             | 6,620 (5,700 – 7,620)                             | 4,680 (4,020 – 5,440)    | 2,480 (1,760 – 3,470)    | 4,140 (2,900 – 5,280)      | 62.6%                        | 23.4                                 | 23.5 | 24.1 |
|                                  | 3rd             | 6,160 (5,460 – 6,930)                             | 4,340 (3,810 – 4,940)    | 2,180 (1,550 – 3,040)    | 3,980 (2,950 – 4,920)      | 64.6%                        | 21.8                                 | 21.8 | 21.2 |
|                                  | 4th             | 5,660 (4,830 – 6,560)                             | 3,710 (3,150 – 4,370)    | 1,820 (1,270 – 2,580)    | 3,840 (2,800 – 4,860)      | 67.8%                        | 20.0                                 | 18.6 | 17.7 |
|                                  | 5th             | 2,960 (2,250 – 3,830)                             | 2,020 (1,560 – 2,610)    | 1,010 (662 – 1,530)      | 1,940 (1,250 – 2,710)      | 65.6%                        | 10.5                                 | 10.2 | 9.8  |
| Lesotho                          | 1st             | 1,160 (982 – 1,340)                               | 1,410 (1,220 – 1,620)    | 1,250 (937 – 1,650)      | -95 (-509 – 240)           | -8.2%                        | 22.5                                 | 21.7 | 22.1 |
|                                  | 2nd             | 1,160 (1,010 – 1,320)                             | 1,450 (1,280 – 1,630)    | 1,280 (969 – 1,670)      | -115 (-529 – 220)          | -9.9%                        | 22.6                                 | 22.4 | 22.6 |
|                                  | 3rd             | 1,090 (965 – 1,220)                               | 1,380 (1,250 – 1,530)    | 1,200 (916 – 1,550)      | -107 (-471 – 182)          | -9.8%                        | 21.2                                 | 21.3 | 21.1 |
|                                  | 4th             | 945 (811 – 1,090)                                 | 1,240 (1,090 – 1,410)    | 1,070 (808 – 1,420)      | -129 (-486 – 156)          | -13.7%                       | 18.4                                 | 19.1 | 19.0 |
|                                  | 5th             | 793 (655 – 957)                                   | 1,020 (861 – 1,190)      | 860 (628 – 1,160)        | -67 (-371 – 179)           | -8.5%                        | 15.4                                 | 15.6 | 15.2 |
| Liberia                          | 1st             | 4,970 (4,220 – 5,860)                             | 4,120 (3,530 – 4,750)    | 2,420 (1,780 – 3,400)    | 2,550 (1,450 – 3,550)      | 51.3%                        | 20.2                                 | 20.3 | 23.1 |
|                                  | 2nd             | 5,280 (4,610 – 6,020)                             | 4,250 (3,770 – 4,790)    | 2,300 (1,700 – 3,180)    | 2,990 (1,960 – 3,850)      | 56.6%                        | 21.4                                 | 21.0 | 21.9 |
|                                  | 3rd             | 5,060 (4,530 – 5,630)                             | 4,160 (3,760 – 4,590)    | 2,100 (1,570 – 2,910)    | 2,960 (2,090 – 3,670)      | 58.5%                        | 20.5                                 | 20.5 | 20.1 |
|                                  | 4th             | 4,910 (4,210 – 5,650)                             | 4,030 (3,530 – 4,580)    | 1,820 (1,330 – 2,540)    | 3,090 (2,170 – 3,930)      | 63.0%                        | 19.9                                 | 19.9 | 17.4 |
|                                  | 5th             | 4,430 (3,670 – 5,300)                             | 3,710 (3,180 – 4,330)    | 1,830 (1,330 – 2,600)    | 2,600 (1,630 – 3,530)      | 58.7%                        | 18.0                                 | 18.3 | 17.5 |
| Madagascar                       | 1st             | 18,300 (16,100 – 20,600)                          | 17,000 (15,100 – 19,200) | 10,000 (6,790 – 14,400)  | 8,280 (3,460 – 12,100)     | 45.3%                        | 23.4                                 | 25.1 | 26.8 |
|                                  | 2nd             | 18,200 (16,300 – 20,200)                          | 15,800 (14,000 – 17,700) | 8,920 (6,130 – 12,800)   | 9,250 (5,050 – 12,600)     | 50.9%                        | 23.3                                 | 23.3 | 23.9 |
|                                  | 3rd             | 16,600 (15,200 – 18,100)                          | 14,400 (13,000 – 15,800) | 7,660 (5,300 – 10,900)   | 8,980 (5,580 – 11,600)     | 54.0%                        | 21.3                                 | 21.3 | 20.5 |
|                                  | 4th             | 15,500 (13,800 – 17,300)                          | 12,400 (10,900 – 13,900) | 6,410 (4,370 – 9,160)    | 9,080 (5,870 – 11,700)     | 58.6%                        | 19.8                                 | 18.3 | 17.1 |
|                                  | 5th             | 9,440 (7,990 – 11,100)                            | 8,090 (6,830 – 9,500)    | 4,380 (2,890 – 6,520)    | 5,070 (2,840 – 7,100)      | 53.7%                        | 12.1                                 | 12.0 | 11.7 |
| Malawi                           | 1st             | 20,500 (18,500 – 22,600)                          | 17,900 (16,400 – 19,500) | 8,450 (6,400 – 11,100)   | 12,100 (8,740 – 15,000)    | 59.0%                        | 20.9                                 | 21.2 | 23.7 |
|                                  | 2nd             | 21,600 (19,600 – 23,600)                          | 18,800 (17,300 – 20,300) | 8,300 (6,320 – 10,900)   | 13,300 (10,100 – 16,100)   | 61.6%                        | 21.9                                 | 22.2 | 23.3 |
|                                  | 3rd             | 21,000 (19,500 – 22,500)                          | 17,900 (16,700 – 19,200) | 7,290 (5,610 – 9,430)    | 13,700 (11,200 – 15,900)   | 65.2%                        | 21.3                                 | 21.1 | 20.4 |
|                                  | 4th             | 20,500 (18,600 – 22,400)                          | 17,200 (15,700 – 18,700) | 6,210 (4,690 – 8,150)    | 14,300 (11,600 – 16,700)   | 69.9%                        | 20.8                                 | 20.3 | 17.4 |
|                                  | 5th             | 14,800 (13,300 – 16,600)                          | 12,800 (11,600 – 14,000) | 5,430 (4,110 – 7,200)    | 9,410 (7,130 – 11,400)     | 63.4%                        | 15.1                                 | 15.1 | 15.2 |
| Maldives                         | 1st             | 207 (170 – 250)                                   | 73 (60 – 88)             | 18 (13 – 24)             | 189 (152 – 230)            | 91.3%                        | 24.2                                 | 25.7 | 27.1 |
|                                  | 2nd             | 195 (168 – 225)                                   | 67 (57 – 78)             | 15 (12 – 20)             | 180 (153 – 210)            | 92.1%                        | 22.8                                 | 23.6 | 23.2 |
|                                  | 3rd             | 180 (159 – 202)                                   | 58 (51 – 66)             | 13 (10 – 17)             | 167 (145 – 189)            | 92.6%                        | 21.1                                 | 20.3 | 20.1 |
|                                  | 4th             | 154 (130 – 181)                                   | 49 (41 – 58)             | 11 (8 – 14)              | 143 (119 – 170)            | 93.1%                        | 18.0                                 | 17.1 | 16.1 |
|                                  | 5th             | 119 (88 – 159)                                    | 38 (28 – 51)             | 9 (6 – 13)               | 110 (80 – 148)             | 92.6%                        | 13.9                                 | 13.4 | 13.5 |
| Mali                             | 1st             | 22,100 (20,100 – 24,400)                          | 24,000 (21,700 – 26,400) | 19,800 (12,100 – 31,900) | 2,360 (-9,660 – 10,100)    | 10.7%                        | 22.0                                 | 21.6 | 24.0 |
|                                  | 2nd             | 22,700 (20,700 – 24,900)                          | 25,600 (23,300 – 28,200) | 19,100 (11,700 – 30,600) | 3,670 (-7,690 – 11,100)    | 16.1%                        | 22.5                                 | 23.0 | 23.1 |
|                                  | 3rd             | 21,700 (20,000 – 23,400)                          | 24,100 (22,100 – 26,300) | 17,800 (11,100 – 28,600) | 3,820 (-6,850 – 10,600)    | 17.6%                        | 21.5                                 | 21.7 | 21.7 |
|                                  | 4th             | 20,700 (18,800 – 22,800)                          | 23,300 (21,100 – 25,700) | 15,500 (9,640 – 25,200)  | 5,190 (-4,440 – 11,400)    | 25.0%                        | 20.6                                 | 20.9 | 18.9 |
|                                  | 5th             | 13,600 (12,100 – 15,200)                          | 14,200 (12,700 – 15,800) | 10,200 (6,170 – 16,500)  | 3,380 (-2,960 – 7,600)     | 24.9%                        | 13.5                                 | 12.8 | 12.4 |

Continued on next page

Absolute decline: wealth quintile-specific under-5 deaths (1990) - wealth quintile-specific under-5 deaths (2016).

Percentage decline: absolute decline over wealth quintile-specific under-5 deaths (1990) × 100.

Share of total death (in percentage): wealth quintile-specific under-5 deaths over the total under-5 deaths × 100.

Table 9 – continued from previous page

|            | Wealth Quintile | number of wealth quintile-specific under-5 deaths |                          |                          |                            |                              | Share of total death (in percentage) |      |      |
|------------|-----------------|---------------------------------------------------|--------------------------|--------------------------|----------------------------|------------------------------|--------------------------------------|------|------|
|            |                 | 1990                                              | 2000                     | 2016                     | Absolute decline 1990–2016 | Percentage decline 1990–2016 | 1990                                 | 2000 | 2016 |
| Mauritania | 1st             | 2,330 (1,960 – 2,760)                             | 2,880 (2,440 – 3,400)    | 2,970 (1,630 – 5,420)    | -643 (-3,100 – 731)        | -27.6%                       | 25.1                                 | 25.5 | 25.6 |
|            | 2nd             | 2,060 (1,770 – 2,360)                             | 2,490 (2,140 – 2,900)    | 2,620 (1,440 – 4,750)    | -559 (-2,680 – 644)        | -27.2%                       | 22.1                                 | 22.0 | 22.5 |
|            | 3rd             | 1,920 (1,690 – 2,170)                             | 2,330 (2,030 – 2,660)    | 2,360 (1,310 – 4,260)    | -442 (-2,340 – 617)        | -23.0%                       | 20.7                                 | 20.6 | 20.4 |
|            | 4th             | 1,650 (1,400 – 1,910)                             | 1,980 (1,680 – 2,310)    | 1,980 (1,090 – 3,570)    | -334 (-1,950 – 581)        | -20.3%                       | 17.7                                 | 17.5 | 17.1 |
|            | 5th             | 1,340 (1,070 – 1,640)                             | 1,630 (1,320 – 2,000)    | 1,670 (909 – 3,110)      | -332 (-1,730 – 456)        | -24.8%                       | 14.4                                 | 14.4 | 14.4 |
| Mongolia   | 1st             | 1,940 (1,660 – 2,250)                             | 803 (691 – 928)          | 377 (248 – 569)          | 1,570 (1,240 – 1,880)      | 80.7%                        | 25.5                                 | 26.8 | 29.1 |
|            | 2nd             | 1,760 (1,540 – 1,990)                             | 711 (619 – 809)          | 302 (199 – 448)          | 1,450 (1,200 – 1,700)      | 82.6%                        | 23.0                                 | 23.7 | 23.3 |
|            | 3rd             | 1,600 (1,430 – 1,780)                             | 611 (537 – 687)          | 257 (170 – 378)          | 1,340 (1,140 – 1,540)      | 83.8%                        | 20.9                                 | 20.4 | 19.8 |
|            | 4th             | 1,320 (1,140 – 1,530)                             | 497 (422 – 577)          | 201 (130 – 303)          | 1,120 (926 – 1,320)        | 84.6%                        | 17.3                                 | 16.6 | 15.5 |
|            | 5th             | 1,010 (814 – 1,240)                               | 378 (304 – 462)          | 161 (102 – 249)          | 852 (651 – 1,070)          | 84.2%                        | 13.3                                 | 12.6 | 12.4 |
| Morocco    | 1st             | 15,500 (13,500 – 17,700)                          | 8,890 (7,700 – 10,200)   | 5,410 (3,800 – 7,550)    | 10,100 (7,390 – 12,600)    | 65.2%                        | 26.7                                 | 27.9 | 28.4 |
|            | 2nd             | 13,900 (12,400 – 15,500)                          | 7,870 (6,920 – 8,930)    | 4,550 (3,240 – 6,290)    | 9,360 (7,120 – 11,300)     | 67.3%                        | 23.9                                 | 24.7 | 23.9 |
|            | 3rd             | 12,300 (11,100 – 13,500)                          | 6,530 (5,820 – 7,300)    | 3,880 (2,800 – 5,310)    | 8,400 (6,630 – 9,930)      | 68.4%                        | 21.1                                 | 20.5 | 20.3 |
|            | 4th             | 10,300 (8,960 – 11,700)                           | 5,290 (4,540 – 6,140)    | 3,180 (2,260 – 4,440)    | 7,100 (5,320 – 8,660)      | 69.1%                        | 17.7                                 | 16.6 | 16.7 |
|            | 5th             | 6,160 (5,050 – 7,440)                             | 2,050 (2,670 – 4,070)    | 2,050 (1,400 – 3,000)    | 4,110 (2,900 – 5,350)      | 66.7%                        | 10.6                                 | 10.4 | 10.8 |
| Mozambique | 1st             | 32,100 (28,000 – 36,700)                          | 29,500 (26,600 – 32,700) | 18,900 (13,500 – 25,900) | 13,300 (5,440 – 19,700)    | 41.4%                        | 21.6                                 | 21.7 | 24.2 |
|            | 2nd             | 33,200 (29,800 – 37,200)                          | 29,800 (27,000 – 32,900) | 17,400 (12,700 – 23,800) | 15,800 (8,870 – 21,800)    | 47.5%                        | 22.4                                 | 21.9 | 22.4 |
|            | 3rd             | 31,100 (28,200 – 34,100)                          | 28,500 (26,100 – 31,200) | 16,000 (11,700 – 21,700) | 15,100 (9,020 – 20,100)    | 48.5%                        | 20.9                                 | 21.0 | 20.5 |
|            | 4th             | 29,900 (26,400 – 33,800)                          | 27,900 (25,200 – 30,800) | 13,900 (10,100 – 19,100) | 16,000 (9,960 – 21,100)    | 53.5%                        | 20.1                                 | 20.5 | 17.8 |
|            | 5th             | 22,200 (19,000 – 25,600)                          | 20,200 (18,000 – 22,600) | 11,800 (8,400 – 16,300)  | 10,400 (5,150 – 15,000)    | 46.9%                        | 14.9                                 | 14.9 | 15.1 |
| Myanmar    | 1st             | 31,000 (25,500 – 37,100)                          | 24,700 (20,500 – 29,300) | 12,400 (9,100 – 16,400)  | 18,500 (12,600 – 24,800)   | 59.7%                        | 24.1                                 | 24.8 | 26.1 |
|            | 2nd             | 29,300 (25,300 – 33,500)                          | 23,000 (19,900 – 26,300) | 11,400 (8,560 – 14,700)  | 18,000 (13,100 – 22,800)   | 61.4%                        | 22.9                                 | 23.1 | 23.8 |
|            | 3rd             | 27,300 (24,200 – 30,600)                          | 21,000 (18,800 – 23,500) | 9,770 (7,470 – 12,400)   | 17,500 (13,700 – 21,400)   | 64.2%                        | 21.2                                 | 21.1 | 20.5 |
|            | 4th             | 23,400 (19,800 – 27,300)                          | 17,600 (15,000 – 20,400) | 8,050 (6,010 – 10,500)   | 15,400 (11,400 – 19,600)   | 65.7%                        | 18.3                                 | 17.7 | 16.9 |
|            | 5th             | 17,300 (12,700 – 22,900)                          | 13,300 (9,950 – 17,500)  | 6,130 (4,190 – 8,700)    | 11,200 (7,270 – 15,800)    | 64.7%                        | 13.5                                 | 13.3 | 12.8 |
| Namibia    | 1st             | 844 (727 – 969)                                   | 1,010 (877 – 1,160)      | 798 (540 – 1,180)        | 46 (-341 – 319)            | 5.5%                         | 22.9                                 | 23.0 | 24.9 |
|            | 2nd             | 872 (770 – 985)                                   | 1,050 (925 – 1,180)      | 765 (522 – 1,130)        | 107 (-256 – 370)           | 12.3%                        | 23.7                                 | 23.8 | 23.9 |
|            | 3rd             | 772 (692 – 855)                                   | 927 (835 – 1,030)        | 657 (449 – 961)          | 114 (-197 – 334)           | 14.8%                        | 21.0                                 | 21.1 | 20.5 |
|            | 4th             | 683 (594 – 787)                                   | 827 (722 – 950)          | 569 (385 – 846)          | 114 (-168 – 323)           | 16.7%                        | 18.6                                 | 18.8 | 17.8 |
|            | 5th             | 508 (422 – 608)                                   | 592 (492 – 704)          | 417 (275 – 634)          | 91 (-122 – 250)            | 17.9%                        | 13.8                                 | 13.4 | 13.0 |
| Nepal      | 1st             | 21,600 (19,200 – 24,300)                          | 14,600 (13,000 – 16,300) | 5,040 (4,050 – 6,280)    | 16,600 (14,000 – 19,300)   | 76.7%                        | 21.8                                 | 23.5 | 25.6 |
|            | 2nd             | 22,900 (20,700 – 25,300)                          | 14,400 (13,000 – 15,900) | 4,700 (3,830 – 5,800)    | 18,200 (15,800 – 20,700)   | 79.4%                        | 23.1                                 | 23.3 | 23.8 |
|            | 3rd             | 21,800 (20,000 – 23,700)                          | 13,400 (12,300 – 14,600) | 4,070 (3,360 – 4,960)    | 17,700 (15,800 – 19,700)   | 81.3%                        | 22.0                                 | 21.7 | 20.6 |
|            | 4th             | 19,400 (17,300 – 21,700)                          | 11,200 (10,100 – 12,500) | 3,370 (2,690 – 4,230)    | 16,000 (13,800 – 18,300)   | 82.6%                        | 19.6                                 | 18.1 | 17.1 |
|            | 5th             | 13,400 (11,500 – 15,400)                          | 8,250 (7,170 – 9,470)    | 2,540 (1,970 – 3,240)    | 10,800 (8,950 – 12,800)    | 80.9%                        | 13.5                                 | 13.3 | 12.9 |
| Nicaragua  | 1st             | 2,420 (2,080 – 2,790)                             | 1,380 (1,170 – 1,620)    | 630 (387 – 1,010)        | 1,790 (1,300 – 2,210)      | 74.1%                        | 24.1                                 | 25.3 | 26.5 |
|            | 2nd             | 2,430 (2,150 – 2,740)                             | 1,340 (1,170 – 1,530)    | 567 (350 – 914)          | 1,860 (1,440 – 2,230)      | 76.5%                        | 24.3                                 | 24.5 | 23.9 |
|            | 3rd             | 2,130 (1,920 – 2,360)                             | 1,140 (1,010 – 1,280)    | 489 (307 – 786)          | 1,640 (1,300 – 1,920)      | 77.0%                        | 21.3                                 | 20.8 | 20.6 |
|            | 4th             | 1,800 (1,560 – 2,070)                             | 953 (816 – 1,110)        | 398 (245 – 646)          | 1,400 (1,070 – 1,710)      | 77.7%                        | 18.0                                 | 17.4 | 16.7 |
|            | 5th             | 1,240 (978 – 1,540)                               | 663 (521 – 835)          | 294 (174 – 495)          | 941 (659 – 1,220)          | 76.2%                        | 12.3                                 | 12.1 | 12.4 |
| Niger      | 1st             | 25,500 (22,700 – 28,600)                          | 23,300 (21,000 – 25,800) | 18,200 (12,700 – 26,200) | 7,330 (-983 – 13,400)      | 28.7%                        | 18.6                                 | 18.2 | 21.1 |
|            | 2nd             | 33,000 (29,800 – 36,400)                          | 30,100 (27,200 – 33,200) | 20,100 (14,300 – 28,600) | 12,900 (3,730 – 19,600)    | 39.1%                        | 24.0                                 | 23.5 | 23.4 |
|            | 3rd             | 30,100 (27,600 – 32,600)                          | 28,000 (25,600 – 30,500) | 18,600 (13,300 – 26,400) | 11,500 (3,630 – 17,300)    | 38.2%                        | 21.9                                 | 21.8 | 21.6 |
|            | 4th             | 29,200 (26,100 – 32,400)                          | 27,900 (25,200 – 30,800) | 16,500 (11,600 – 23,600) | 12,700 (5,180 – 18,400)    | 43.5%                        | 21.3                                 | 21.8 | 19.2 |
|            | 5th             | 19,500 (17,100 – 22,100)                          | 18,800 (16,700 – 21,000) | 12,600 (8,800 – 18,200)  | 6,940 (1,040 – 11,400)     | 35.5%                        | 14.2                                 | 14.7 | 14.7 |

Continued on next page

Absolute decline: wealth quintile-specific under-5 deaths (1990) - wealth quintile-specific under-5 deaths (2016).

Percentage decline: absolute decline over wealth quintile-specific under-5 deaths (1990) × 100.

Share of total death (in percentage): wealth quintile-specific under-5 deaths over the total under-5 deaths × 100.

Table 9 – continued from previous page

|                       | Wealth Quintile | number of wealth quintile-specific under-5 deaths |                             |                             |                            |                              | Share of total death (in percentage) |      |      |
|-----------------------|-----------------|---------------------------------------------------|-----------------------------|-----------------------------|----------------------------|------------------------------|--------------------------------------|------|------|
|                       |                 | 1990                                              | 2000                        | 2016                        | Absolute decline 1990–2016 | Percentage decline 1990–2016 | 1990                                 | 2000 | 2016 |
| Nigeria               | 1st             | 205,000 (182,000 – 230,000)                       | 228,000 (208,000 – 249,000) | 197,000 (144,000 – 267,000) | 8,290 (-64,500 – 64,000)   | 4.0%                         | 23.8                                 | 24.2 | 26.9 |
|                       | 2nd             | 206,000 (186,000 – 228,000)                       | 235,000 (215,000 – 255,000) | 176,000 (129,000 – 238,000) | 30,500 (-33,200 – 80,900)  | 14.8%                        | 23.9                                 | 24.9 | 24.0 |
|                       | 3rd             | 187,000 (171,000 – 203,000)                       | 204,000 (188,000 – 220,000) | 157,000 (116,000 – 210,000) | 30,100 (-23,300 – 72,500)  | 16.1%                        | 21.7                                 | 21.6 | 21.4 |
|                       | 4th             | 162,000 (144,000 – 182,000)                       | 173,000 (156,000 – 190,000) | 122,000 (89,000 – 167,000)  | 40,100 (-6,310 – 75,900)   | 24.7%                        | 18.8                                 | 18.4 | 16.7 |
|                       | 5th             | 101,000 (88,600 – 115,000)                        | 103,000 (92,400 – 115,000)  | 80,900 (58,900 – 111,000)   | 19,900 (-12,800 – 44,800)  | 19.7%                        | 11.7                                 | 11.0 | 11.0 |
| Pakistan              | 1st             | 135,000 (120,000 – 150,000)                       | 119,000 (106,000 – 133,000) | 106,000 (79,300 – 141,000)  | 28,800 (-7,360 – 57,700)   | 21.4%                        | 23.1                                 | 24.1 | 25.0 |
|                       | 2nd             | 135,000 (123,000 – 149,000)                       | 115,000 (104,000 – 126,000) | 99,100 (75,300 – 130,000)   | 36,400 (3,520 – 63,200)    | 26.9%                        | 23.2                                 | 23.2 | 23.4 |
|                       | 3rd             | 125,000 (116,000 – 134,000)                       | 106,000 (98,300 – 113,000)  | 88,900 (68,200 – 116,000)   | 36,000 (7,930 – 58,100)    | 28.8%                        | 21.4                                 | 21.4 | 21.0 |
|                       | 4th             | 111,000 (99,700 – 123,000)                        | 88,300 (79,100 – 98,000)    | 74,000 (55,600 – 98,400)    | 37,300 (11,300 – 58,500)   | 33.5%                        | 19.1                                 | 17.9 | 17.5 |
|                       | 5th             | 77,600 (66,900 – 89,900)                          | 66,600 (57,500 – 76,900)    | 55,900 (41,000 – 75,700)    | 21,700 (1,470 – 39,100)    | 28.0%                        | 13.3                                 | 13.5 | 13.2 |
| Paraguay              | 1st             | 1,630 (1,360 – 1,930)                             | 1,240 (1,000 – 1,510)       | 745 (444 – 1,220)           | 889 (387 – 1,290)          | 54.4%                        | 25.2                                 | 25.7 | 26.7 |
|                       | 2nd             | 1,540 (1,330 – 1,780)                             | 1,150 (954 – 1,370)         | 656 (395 – 1,060)           | 887 (453 – 1,220)          | 57.5%                        | 23.8                                 | 23.7 | 23.5 |
|                       | 3rd             | 1,350 (1,190 – 1,540)                             | 996 (843 – 1,170)           | 571 (346 – 924)             | 782 (418 – 1,060)          | 57.8%                        | 20.8                                 | 20.6 | 20.5 |
|                       | 4th             | 1,140 (970 – 1,340)                               | 842 (684 – 1,020)           | 466 (280 – 760)             | 679 (369 – 939)            | 59.3%                        | 17.7                                 | 17.4 | 16.7 |
|                       | 5th             | 813 (603 – 1,070)                                 | 606 (441 – 812)             | 353 (198 – 606)             | 461 (205 – 692)            | 56.7%                        | 12.5                                 | 12.5 | 12.6 |
| Peru                  | 1st             | 15,500 (14,100 – 16,900)                          | 7,390 (6,640 – 8,150)       | 2,940 (2,210 – 3,960)       | 12,500 (10,900 – 14,100)   | 80.9%                        | 29.5                                 | 30.7 | 31.3 |
|                       | 2nd             | 13,100 (11,900 – 14,300)                          | 6,030 (5,440 – 6,680)       | 2,230 (1,690 – 2,990)       | 10,800 (9,500 – 12,100)    | 82.7%                        | 25.0                                 | 25.0 | 23.8 |
|                       | 3rd             | 10,700 (9,820 – 11,500)                           | 4,750 (4,310 – 5,200)       | 1,860 (1,410 – 2,470)       | 8,810 (7,810 – 9,760)      | 82.6%                        | 20.4                                 | 19.7 | 19.8 |
|                       | 4th             | 8,050 (7,200 – 8,940)                             | 3,570 (3,140 – 4,020)       | 1,400 (1,020 – 1,910)       | 6,650 (5,710 – 7,610)      | 82.6%                        | 15.4                                 | 14.8 | 14.9 |
|                       | 5th             | 5,080 (4,360 – 5,860)                             | 2,340 (1,990 – 2,740)       | 959 (696 – 1,340)           | 4,120 (3,350 – 4,890)      | 81.0%                        | 9.7                                  | 9.7  | 10.2 |
| Philippines           | 1st             | 35,000 (31,400 – 38,900)                          | 27,600 (24,600 – 30,900)    | 19,600 (14,100 – 27,200)    | 15,400 (7,410 – 21,700)    | 44.0%                        | 30.1                                 | 30.6 | 30.4 |
|                       | 2nd             | 27,400 (24,600 – 30,400)                          | 21,500 (19,200 – 24,100)    | 15,000 (10,800 – 20,500)    | 12,400 (6,390 – 17,200)    | 45.2%                        | 23.6                                 | 23.9 | 23.3 |
|                       | 3rd             | 23,400 (21,300 – 25,600)                          | 17,800 (16,100 – 19,700)    | 12,800 (9,290 – 17,400)     | 10,600 (5,750 – 14,500)    | 45.3%                        | 20.1                                 | 19.8 | 19.8 |
|                       | 4th             | 18,100 (15,900 – 20,400)                          | 14,100 (12,300 – 16,000)    | 10,400 (7,400 – 14,500)     | 7,750 (3,340 – 11,300)     | 42.8%                        | 15.6                                 | 15.6 | 16.1 |
|                       | 5th             | 12,200 (10,300 – 14,500)                          | 9,150 (7,640 – 10,900)      | 6,730 (4,670 – 9,650)       | 5,490 (2,510 – 8,160)      | 44.9%                        | 10.5                                 | 10.1 | 10.4 |
| Republic of Moldova   | 1st             | 715 (560 – 887)                                   | 402 (312 – 512)             | 183 (123 – 277)             | 532 (364 – 704)            | 74.4%                        | 26.0                                 | 25.9 | 27.0 |
|                       | 2nd             | 636 (521 – 768)                                   | 358 (288 – 443)             | 155 (106 – 232)             | 481 (344 – 618)            | 75.7%                        | 23.1                                 | 23.1 | 22.9 |
|                       | 3rd             | 550 (459 – 652)                                   | 310 (251 – 376)             | 134 (93 – 199)              | 415 (306 – 523)            | 75.5%                        | 20.0                                 | 20.0 | 19.9 |
|                       | 4th             | 459 (373 – 561)                                   | 258 (204 – 324)             | 107 (71 – 162)              | 352 (250 – 455)            | 76.6%                        | 16.7                                 | 16.6 | 15.9 |
|                       | 5th             | 391 (282 – 531)                                   | 222 (160 – 308)             | 96 (61 – 157)               | 295 (189 – 419)            | 75.4%                        | 14.2                                 | 14.3 | 14.3 |
| Rwanda                | 1st             | 9,520 (8,440 – 10,700)                            | 11,700 (10,500 – 13,200)    | 3,530 (2,220 – 5,610)       | 5,990 (3,680 – 7,690)      | 62.9%                        | 19.8                                 | 20.5 | 24.9 |
|                       | 2nd             | 10,700 (9,680 – 11,800)                           | 12,200 (10,900 – 13,600)    | 3,190 (2,030 – 5,000)       | 7,490 (5,430 – 9,070)      | 70.1%                        | 22.3                                 | 21.3 | 22.5 |
|                       | 3rd             | 10,000 (9,200 – 10,900)                           | 11,900 (10,800 – 13,100)    | 2,830 (1,800 – 4,420)       | 7,170 (5,430 – 8,480)      | 71.7%                        | 20.8                                 | 20.8 | 20.0 |
|                       | 4th             | 10,000 (9,030 – 11,200)                           | 12,500 (11,200 – 13,900)    | 2,530 (1,600 – 4,000)       | 7,520 (5,780 – 8,940)      | 74.9%                        | 20.9                                 | 21.8 | 17.8 |
|                       | 5th             | 7,720 (6,840 – 8,730)                             | 8,930 (7,860 – 10,100)      | 2,090 (1,310 – 3,350)       | 5,630 (4,150 – 6,880)      | 72.9%                        | 16.1                                 | 15.6 | 14.8 |
| Sao Tome and Principe | 1st             | 106 (86 – 129)                                    | 103 (83 – 126)              | 56 (36 – 85)                | 50 (17 – 78)               | 47.2%                        | 22.7                                 | 23.1 | 24.8 |
|                       | 2nd             | 102 (85 – 119)                                    | 98 (82 – 117)               | 51 (34 – 77)                | 50 (21 – 75)               | 49.2%                        | 21.8                                 | 22.0 | 22.7 |
|                       | 3rd             | 96 (82 – 111)                                     | 92 (78 – 107)               | 45 (29 – 67)                | 51 (26 – 72)               | 53.1%                        | 20.6                                 | 20.4 | 19.8 |
|                       | 4th             | 81 (67 – 97)                                      | 78 (64 – 93)                | 38 (24 – 56)                | 44 (21 – 64)               | 54.0%                        | 17.5                                 | 17.3 | 16.6 |
|                       | 5th             | 81 (63 – 103)                                     | 77 (60 – 98)                | 36 (23 – 57)                | 45 (21 – 67)               | 55.6%                        | 17.4                                 | 17.2 | 16.1 |
| Senegal               | 1st             | 11,200 (10,100 – 12,400)                          | 13,000 (11,800 – 14,300)    | 6,990 (5,440 – 9,020)       | 4,230 (1,930 – 6,160)      | 37.7%                        | 25.5                                 | 25.8 | 27.6 |
|                       | 2nd             | 10,200 (9,260 – 11,200)                           | 11,600 (10,600 – 12,700)    | 5,970 (4,630 – 7,690)       | 4,210 (2,270 – 5,850)      | 41.4%                        | 23.1                                 | 23.1 | 23.6 |
|                       | 3rd             | 9,330 (8,640 – 10,000)                            | 10,700 (9,810 – 11,500)     | 5,140 (4,040 – 6,550)       | 4,190 (2,670 – 5,450)      | 44.9%                        | 21.2                                 | 21.2 | 20.3 |
|                       | 4th             | 7,870 (6,980 – 8,780)                             | 8,850 (7,900 – 9,870)       | 4,230 (3,280 – 5,480)       | 3,640 (2,150 – 4,930)      | 46.3%                        | 17.9                                 | 17.6 | 16.7 |
|                       | 5th             | 5,400 (4,660 – 6,260)                             | 6,180 (5,420 – 7,060)       | 2,960 (2,240 – 3,920)       | 2,440 (1,290 – 3,470)      | 45.2%                        | 12.3                                 | 12.3 | 11.7 |

Continued on next page

Absolute decline: wealth quintile-specific under-5 deaths (1990) - wealth quintile-specific under-5 deaths (2016).

Percentage decline: absolute decline over wealth quintile-specific under-5 deaths (1990) × 100.

Share of total death (in percentage): wealth quintile-specific under-5 deaths over the total under-5 deaths × 100.

Table 9 – continued from previous page

|                    | Wealth Quintile | number of wealth quintile-specific under-5 deaths |                          |                          |                            |                              | Share of total death (in percentage) |      |      |
|--------------------|-----------------|---------------------------------------------------|--------------------------|--------------------------|----------------------------|------------------------------|--------------------------------------|------|------|
|                    |                 | 1990                                              | 2000                     | 2016                     | Absolute decline 1990–2016 | Percentage decline 1990–2016 | 1990                                 | 2000 | 2016 |
| Serbia             | 1st             | 1,080 (894 – 1,280)                               | 414 (339 – 498)          | 148 (118 – 186)          | 928 (757 – 1,110)          | 86.2%                        | 26.5                                 | 27.3 | 27.3 |
|                    | 2nd             | 939 (826 – 1,060)                                 | 348 (298 – 396)          | 125 (104 – 149)          | 815 (702 – 925)            | 86.8%                        | 23.1                                 | 22.9 | 23.0 |
|                    | 3rd             | 813 (737 – 887)                                   | 302 (269 – 333)          | 108 (93 – 127)           | 705 (634 – 773)            | 86.7%                        | 20.0                                 | 19.9 | 19.9 |
|                    | 4th             | 679 (581 – 785)                                   | 242 (196 – 287)          | 87 (69 – 108)            | 593 (498 – 693)            | 87.3%                        | 16.7                                 | 16.0 | 16.0 |
|                    | 5th             | 560 (418 – 743)                                   | 210 (154 – 281)          | 75 (54 – 104)            | 485 (356 – 649)            | 86.6%                        | 13.8                                 | 13.9 | 13.8 |
| Sierra Leone       | 1st             | 10,600 (9,210 – 12,200)                           | 10,500 (9,380 – 11,700)  | 6,650 (5,050 – 8,470)    | 3,970 (1,850 – 6,060)      | 37.4%                        | 21.4                                 | 21.8 | 23.0 |
|                    | 2nd             | 10,400 (9,130 – 11,800)                           | 9,980 (8,940 – 11,100)   | 6,130 (4,700 – 7,730)    | 4,300 (2,420 – 6,120)      | 41.3%                        | 21.0                                 | 20.8 | 21.2 |
|                    | 3rd             | 10,200 (9,100 – 11,200)                           | 9,800 (8,880 – 10,800)   | 5,900 (4,560 – 7,400)    | 4,260 (2,610 – 5,830)      | 41.9%                        | 20.5                                 | 20.4 | 20.4 |
|                    | 4th             | 10,400 (9,080 – 11,800)                           | 9,940 (8,870 – 11,100)   | 5,260 (4,000 – 6,720)    | 5,140 (3,330 – 6,960)      | 49.4%                        | 20.9                                 | 20.7 | 18.2 |
|                    | 5th             | 8,060 (6,820 – 9,370)                             | 7,820 (6,880 – 8,870)    | 4,980 (3,760 – 6,410)    | 3,080 (1,320 – 4,690)      | 38.2%                        | 16.2                                 | 16.3 | 17.2 |
| Somalia            | 1st             | 13,200 (10,100 – 17,100)                          | 15,900 (11,800 – 21,600) | 18,000 (9,780 – 33,500)  | -4,840 (-19,000 – 2,690)   | -36.7%                       | 21.6                                 | 21.6 | 22.8 |
|                    | 2nd             | 13,900 (11,100 – 17,400)                          | 16,700 (12,900 – 21,900) | 18,000 (9,900 – 32,900)  | -4,100 (-17,600 – 3,270)   | -29.6%                       | 22.7                                 | 22.7 | 22.7 |
|                    | 3rd             | 12,900 (10,600 – 16,000)                          | 15,600 (12,100 – 20,300) | 16,700 (9,260 – 30,600)  | -3,820 (-16,500 – 2,920)   | -29.5%                       | 21.2                                 | 21.2 | 21.2 |
|                    | 4th             | 12,200 (9,680 – 15,400)                           | 14,600 (11,100 – 19,400) | 14,900 (8,200 – 27,600)  | -2,770 (-14,200 – 3,460)   | -22.8%                       | 19.9                                 | 19.9 | 18.9 |
|                    | 5th             | 8,870 (6,330 – 12,300)                            | 10,700 (7,420 – 15,500)  | 11,400 (5,960 – 22,100)  | -2,510 (-11,800 – 2,310)   | -28.3%                       | 14.5                                 | 14.6 | 14.4 |
| South Africa       | 1st             | 17,200 (14,300 – 20,600)                          | 19,800 (16,600 – 23,300) | 14,000 (11,200 – 17,200) | 3,190 (-374 – 6,980)       | 18.6%                        | 27.4                                 | 27.0 | 27.7 |
|                    | 2nd             | 14,700 (12,500 – 17,300)                          | 17,100 (14,700 – 19,500) | 11,900 (9,790 – 14,300)  | 2,810 (-32 – 5,930)        | 19.1%                        | 23.4                                 | 23.3 | 23.5 |
|                    | 3rd             | 12,700 (11,000 – 14,700)                          | 15,100 (13,200 – 17,000) | 10,200 (8,530 – 12,100)  | 2,540 (312 – 4,920)        | 19.9%                        | 20.3                                 | 20.5 | 20.2 |
|                    | 4th             | 10,700 (8,950 – 12,800)                           | 12,700 (10,700 – 14,800) | 8,530 (6,880 – 10,400)   | 2,160 (-77 – 4,530)        | 20.2%                        | 17.1                                 | 17.3 | 16.8 |
|                    | 5th             | 7,370 (5,540 – 9,700)                             | 8,720 (6,540 – 11,300)   | 6,000 (4,320 – 8,110)    | 1,360 (-348 – 3,250)       | 18.5%                        | 11.8                                 | 11.9 | 11.9 |
| South Sudan        | 1st             | 13,100 (10,100 – 16,500)                          | 9,850 (7,800 – 12,300)   | 8,370 (5,030 – 13,600)   | 4,750 (-1,010 – 9,300)     | 36.2%                        | 19.6                                 | 19.6 | 21.7 |
|                    | 2nd             | 14,400 (11,500 – 17,500)                          | 10,800 (8,840 – 13,000)  | 8,330 (5,040 – 13,300)   | 6,080 (426 – 10,600)       | 42.2%                        | 21.5                                 | 21.4 | 21.6 |
|                    | 3rd             | 13,500 (11,000 – 16,100)                          | 10,100 (8,440 – 12,000)  | 7,700 (4,710 – 12,200)   | 5,820 (641 – 9,900)        | 43.0%                        | 20.2                                 | 20.1 | 20.0 |
|                    | 4th             | 12,900 (10,200 – 15,700)                          | 9,560 (7,760 – 11,600)   | 6,580 (3,980 – 10,500)   | 6,300 (1,480 – 10,100)     | 48.9%                        | 19.3                                 | 19.0 | 17.1 |
|                    | 5th             | 12,900 (9,780 – 16,800)                           | 9,960 (7,870 – 12,700)   | 7,500 (4,500 – 12,300)   | 5,420 (-1 – 9,940)         | 42.0%                        | 19.3                                 | 19.8 | 19.5 |
| State of Palestine | 1st             | 1,070 (876 – 1,280)                               | 935 (765 – 1,120)        | 785 (532 – 1,130)        | 286 (-68 – 578)            | 26.7%                        | 25.8                                 | 26.2 | 27.0 |
|                    | 2nd             | 981 (852 – 1,120)                                 | 837 (723 – 961)          | 677 (468 – 974)          | 304 (-8 – 550)             | 31.0%                        | 23.6                                 | 23.4 | 23.3 |
|                    | 3rd             | 849 (754 – 946)                                   | 726 (640 – 814)          | 590 (415 – 835)          | 259 (-4 – 455)             | 30.5%                        | 20.4                                 | 20.3 | 20.3 |
|                    | 4th             | 712 (604 – 830)                                   | 612 (515 – 717)          | 480 (328 – 697)          | 233 (-1 – 417)             | 32.7%                        | 17.2                                 | 17.1 | 16.5 |
|                    | 5th             | 537 (401 – 705)                                   | 463 (348 – 600)          | 377 (244 – 577)          | 160 (-25 – 325)            | 29.8%                        | 12.9                                 | 13.0 | 13.0 |
| Sudan              | 1st             | 23,500 (19,800 – 27,500)                          | 24,700 (21,100 – 28,700) | 19,700 (15,300 – 25,000) | 3,800 (-1,960 – 9,200)     | 16.2%                        | 22.1                                 | 22.6 | 23.7 |
|                    | 2nd             | 24,800 (21,800 – 28,000)                          | 25,800 (22,700 – 29,000) | 20,100 (15,900 – 25,100) | 4,740 (-747 – 9,840)       | 19.1%                        | 23.3                                 | 23.6 | 24.1 |
|                    | 3rd             | 23,000 (20,700 – 25,300)                          | 23,700 (21,300 – 26,200) | 17,600 (14,100 – 21,700) | 5,410 (848 – 9,470)        | 23.5%                        | 21.6                                 | 21.7 | 21.1 |
|                    | 4th             | 20,500 (17,700 – 23,400)                          | 20,300 (17,600 – 23,200) | 15,000 (11,800 – 19,000) | 5,520 (892 – 9,680)        | 26.9%                        | 19.3                                 | 18.6 | 18.0 |
|                    | 5th             | 14,500 (11,700 – 17,800)                          | 14,900 (12,200 – 18,000) | 10,900 (8,200 – 14,200)  | 3,600 (-43 – 7,090)        | 24.9%                        | 13.6                                 | 13.6 | 13.1 |
| Suriname           | 1st             | 142 (110 – 181)                                   | 104 (75 – 142)           | 58 (28 – 121)            | 84 (21 – 130)              | 59.0%                        | 27.6                                 | 28.2 | 28.6 |
|                    | 2nd             | 119 (94 – 149)                                    | 84 (62 – 113)            | 46 (22 – 96)             | 73 (21 – 109)              | 61.2%                        | 23.2                                 | 22.9 | 22.8 |
|                    | 3rd             | 104 (83 – 127)                                    | 73 (55 – 98)             | 40 (19 – 84)             | 63 (19 – 93)               | 60.8%                        | 20.1                                 | 20.0 | 19.9 |
|                    | 4th             | 87 (68 – 110)                                     | 62 (45 – 84)             | 33 (15 – 69)             | 54 (15 – 81)               | 62.3%                        | 16.8                                 | 16.8 | 16.2 |
|                    | 5th             | 63 (44 – 89)                                      | 45 (30 – 67)             | 25 (12 – 54)             | 38 (8 – 62)                | 60.2%                        | 12.3                                 | 12.2 | 12.5 |
| Swaziland          | 1st             | 592 (492 – 706)                                   | 976 (834 – 1,130)        | 684 (460 – 1,010)        | -92 (-418 – 146)           | -15.5%                       | 25.3                                 | 24.1 | 25.4 |
|                    | 2nd             | 513 (434 – 598)                                   | 848 (736 – 967)          | 581 (393 – 859)          | -68 (-343 – 125)           | -13.3%                       | 22.0                                 | 20.9 | 21.6 |
|                    | 3rd             | 464 (402 – 533)                                   | 823 (729 – 928)          | 536 (365 – 781)          | -71 (-317 – 99)            | -15.3%                       | 19.9                                 | 20.3 | 19.9 |
|                    | 4th             | 408 (341 – 483)                                   | 759 (658 – 879)          | 479 (323 – 708)          | -70 (-300 – 89)            | -17.1%                       | 17.5                                 | 18.7 | 17.8 |
|                    | 5th             | 358 (288 – 437)                                   | 651 (545 – 768)          | 416 (276 – 621)          | -58 (-258 – 85)            | -16.2%                       | 15.3                                 | 16.0 | 15.4 |

Continued on next page

Absolute decline: wealth quintile-specific under-5 deaths (1990) - wealth quintile-specific under-5 deaths (2016).

Percentage decline: absolute decline over wealth quintile-specific under-5 deaths (1990) × 100.

Share of total death (in percentage): wealth quintile-specific under-5 deaths over the total under-5 deaths × 100.

Table 9 – continued from previous page

|                                           | Wealth Quintile | number of wealth quintile-specific under-5 deaths |                          |                       |                            |                              | Share of total death (in percentage) |      |      |
|-------------------------------------------|-----------------|---------------------------------------------------|--------------------------|-----------------------|----------------------------|------------------------------|--------------------------------------|------|------|
|                                           |                 | 1990                                              | 2000                     | 2016                  | Absolute decline 1990–2016 | Percentage decline 1990–2016 | 1990                                 | 2000 | 2016 |
| Syrian Arab Republic                      | 1st             | 4,130 (3,390 – 4,950)                             | 3,020 (2,480 – 3,580)    | 1,930 (1,400 – 2,820) | 2,200 (1,120 – 3,060)      | 53.3%                        | 25.1                                 | 25.5 | 25.9 |
|                                           | 2nd             | 3,870 (3,320 – 4,430)                             | 2,760 (2,380 – 3,170)    | 1,710 (1,280 – 2,470) | 2,150 (1,210 – 2,860)      | 55.6%                        | 23.5                                 | 23.3 | 23.0 |
|                                           | 3rd             | 3,340 (2,950 – 3,740)                             | 2,400 (2,110 – 2,690)    | 1,500 (1,150 – 2,130) | 1,830 (1,060 – 2,370)      | 54.8%                        | 20.3                                 | 20.2 | 20.2 |
|                                           | 4th             | 2,820 (2,380 – 3,300)                             | 2,000 (1,680 – 2,350)    | 1,230 (898 – 1,800)   | 1,580 (877 – 2,140)        | 56.1%                        | 17.1                                 | 16.9 | 16.5 |
|                                           | 5th             | 2,290 (1,710 – 3,010)                             | 1,670 (1,260 – 2,200)    | 1,080 (736 – 1,680)   | 1,210 (580 – 1,800)        | 52.9%                        | 13.9                                 | 14.1 | 14.5 |
| Tajikistan                                | 1st             | 5,170 (4,350 – 6,100)                             | 4,060 (3,350 – 4,900)    | 2,690 (1,590 – 4,720) | 2,480 (417 – 3,780)        | 48.0%                        | 23.2                                 | 23.2 | 25.0 |
|                                           | 2nd             | 4,930 (4,250 – 5,710)                             | 3,900 (3,280 – 4,620)    | 2,480 (1,480 – 4,290) | 2,450 (564 – 3,620)        | 49.7%                        | 22.1                                 | 22.4 | 23.1 |
|                                           | 3rd             | 4,630 (4,070 – 5,270)                             | 3,620 (3,090 – 4,240)    | 2,140 (1,290 – 3,700) | 2,490 (880 – 3,500)        | 53.8%                        | 20.8                                 | 20.7 | 19.9 |
|                                           | 4th             | 3,900 (3,320 – 4,580)                             | 2,980 (2,490 – 3,570)    | 1,750 (1,040 – 3,050) | 2,150 (818 – 3,050)        | 55.1%                        | 17.5                                 | 17.1 | 16.3 |
|                                           | 5th             | 3,660 (2,960 – 4,490)                             | 2,890 (2,320 – 3,600)    | 1,670 (979 – 2,970)   | 1,990 (648 – 2,970)        | 54.3%                        | 16.4                                 | 16.6 | 15.6 |
| Thailand                                  | 1st             | 10,600 (8,780 – 12,600)                           | 5,630 (4,500 – 6,900)    | 2,380 (1,390 – 4,090) | 8,240 (5,950 – 10,300)     | 77.6%                        | 25.8                                 | 26.3 | 27.0 |
|                                           | 2nd             | 9,750 (8,500 – 11,100)                            | 5,040 (4,180 – 5,920)    | 2,060 (1,220 – 3,450) | 7,700 (5,880 – 9,210)      | 79.0%                        | 23.7                                 | 23.6 | 23.3 |
|                                           | 3rd             | 8,360 (7,470 – 9,260)                             | 4,320 (3,670 – 4,980)    | 1,780 (1,070 – 2,960) | 6,580 (5,180 – 7,680)      | 78.7%                        | 20.3                                 | 20.2 | 20.2 |
|                                           | 4th             | 7,020 (5,950 – 8,180)                             | 3,560 (2,910 – 4,310)    | 1,420 (834 – 2,400)   | 5,590 (4,230 – 6,830)      | 79.7%                        | 17.0                                 | 16.7 | 16.2 |
|                                           | 5th             | 5,430 (3,980 – 7,250)                             | 2,840 (2,040 – 3,830)    | 1,170 (649 – 2,090)   | 4,260 (2,800 – 5,860)      | 78.5%                        | 13.2                                 | 13.3 | 13.3 |
| The former Yugoslav Republic of Macedonia | 1st             | 358 (298 – 418)                                   | 122 (101 – 145)          | 80 (56 – 132)         | 277 (203 – 336)            | 77.5%                        | 27.0                                 | 28.3 | 28.1 |
|                                           | 2nd             | 307 (269 – 343)                                   | 98 (84 – 112)            | 65 (46 – 106)         | 241 (186 – 281)            | 78.6%                        | 23.1                                 | 22.8 | 22.8 |
|                                           | 3rd             | 264 (240 – 287)                                   | 85 (76 – 94)             | 57 (41 – 91)          | 208 (166 – 236)            | 78.7%                        | 20.0                                 | 19.8 | 19.9 |
|                                           | 4th             | 220 (188 – 252)                                   | 67 (55 – 80)             | 45 (31 – 73)          | 175 (133 – 207)            | 79.6%                        | 16.6                                 | 15.7 | 15.9 |
|                                           | 5th             | 176 (130 – 231)                                   | 57 (42 – 76)             | 38 (25 – 65)          | 138 (92 – 186)             | 78.6%                        | 13.3                                 | 13.3 | 13.3 |
| Timor-Leste                               | 1st             | 1,160 (953 – 1,400)                               | 972 (808 – 1,150)        | 535 (343 – 825)       | 630 (300 – 906)            | 54.1%                        | 21.3                                 | 22.9 | 24.6 |
|                                           | 2nd             | 1,270 (1,100 – 1,460)                             | 992 (863 – 1,130)        | 524 (347 – 805)       | 745 (435 – 992)            | 58.7%                        | 23.2                                 | 23.3 | 24.1 |
|                                           | 3rd             | 1,180 (1,050 – 1,330)                             | 922 (822 – 1,030)        | 455 (298 – 691)       | 730 (473 – 930)            | 61.6%                        | 21.7                                 | 21.7 | 20.9 |
|                                           | 4th             | 1,110 (950 – 1,290)                               | 792 (680 – 921)          | 382 (247 – 591)       | 727 (476 – 936)            | 65.5%                        | 20.3                                 | 18.6 | 17.5 |
|                                           | 5th             | 742 (571 – 950)                                   | 574 (449 – 729)          | 282 (177 – 451)       | 460 (263 – 659)            | 62.0%                        | 13.6                                 | 13.5 | 12.9 |
| Togo                                      | 1st             | 5,250 (4,620 – 5,940)                             | 5,580 (4,960 – 6,250)    | 5,020 (3,920 – 6,390) | 233 (-1,200 – 1,460)       | 4.4%                         | 23.5                                 | 25.1 | 26.2 |
|                                           | 2nd             | 5,260 (4,700 – 5,870)                             | 5,270 (4,710 – 5,870)    | 4,620 (3,630 – 5,820) | 642 (-612 – 1,750)         | 12.2%                        | 23.5                                 | 23.7 | 24.1 |
|                                           | 3rd             | 4,900 (4,470 – 5,370)                             | 4,890 (4,430 – 5,360)    | 4,130 (3,290 – 5,160) | 777 (-255 – 1,660)         | 15.8%                        | 21.9                                 | 22.0 | 21.5 |
|                                           | 4th             | 4,310 (3,800 – 4,840)                             | 3,980 (3,520 – 4,460)    | 3,350 (2,610 – 4,260) | 965 (-2 – 1,820)           | 22.4%                        | 19.3                                 | 17.9 | 17.4 |
|                                           | 5th             | 2,630 (2,240 – 3,080)                             | 2,510 (2,160 – 2,920)    | 2,080 (1,560 – 2,720) | 558 (-95 – 1,150)          | 21.2%                        | 11.8                                 | 11.3 | 10.8 |
| Tunisia                                   | 1st             | 3,190 (2,560 – 3,930)                             | 1,440 (1,140 – 1,800)    | 792 (535 – 1,130)     | 2,400 (1,730 – 3,130)      | 75.3%                        | 25.9                                 | 26.8 | 27.9 |
|                                           | 2nd             | 2,870 (2,400 – 3,400)                             | 1,250 (1,020 – 1,510)    | 650 (446 – 919)       | 2,220 (1,680 – 2,790)      | 77.4%                        | 23.3                                 | 23.2 | 22.9 |
|                                           | 3rd             | 2,520 (2,160 – 2,920)                             | 1,080 (902 – 1,280)      | 568 (395 – 790)       | 1,950 (1,520 – 2,380)      | 77.4%                        | 20.5                                 | 20.1 | 20.0 |
|                                           | 4th             | 2,120 (1,760 – 2,560)                             | 907 (730 – 1,120)        | 455 (305 – 654)       | 1,660 (1,250 – 2,120)      | 78.4%                        | 17.2                                 | 16.9 | 16.0 |
|                                           | 5th             | 1,610 (1,170 – 2,210)                             | 701 (503 – 969)          | 371 (236 – 569)       | 1,240 (829 – 1,780)        | 77.0%                        | 13.1                                 | 13.0 | 13.1 |
| Turkey                                    | 1st             | 30,600 (27,000 – 34,600)                          | 16,400 (14,400 – 18,600) | 5,070 (4,300 – 5,910) | 25,500 (22,100 – 29,400)   | 83.3%                        | 29.5                                 | 30.5 | 30.9 |
|                                           | 2nd             | 23,500 (21,000 – 26,200)                          | 12,500 (11,100 – 14,000) | 3,750 (3,250 – 4,270) | 19,800 (17,300 – 22,500)   | 84.2%                        | 22.6                                 | 23.3 | 22.9 |
|                                           | 3rd             | 21,100 (19,100 – 23,100)                          | 10,600 (9,560 – 11,700)  | 3,240 (2,900 – 3,550) | 17,800 (16,000 – 19,900)   | 84.5%                        | 20.3                                 | 19.7 | 19.8 |
|                                           | 4th             | 17,600 (15,400 – 20,000)                          | 8,640 (7,490 – 9,920)    | 2,560 (2,090 – 3,030) | 15,000 (12,900 – 17,400)   | 85.2%                        | 17.0                                 | 16.1 | 15.6 |
|                                           | 5th             | 11,000 (8,750 – 13,700)                           | 5,570 (4,400 – 6,950)    | 1,760 (1,360 – 2,280) | 9,260 (7,230 – 11,600)     | 84.0%                        | 10.6                                 | 10.4 | 10.8 |
| Turkmenistan                              | 1st             | 2,810 (2,260 – 3,500)                             | 2,280 (1,760 – 2,930)    | 1,950 (830 – 4,150)   | 856 (-1,330 – 2,070)       | 30.5%                        | 25.3                                 | 25.6 | 26.9 |
|                                           | 2nd             | 2,510 (2,080 – 2,990)                             | 2,020 (1,600 – 2,540)    | 1,670 (720 – 3,560)   | 833 (-1,010 – 1,860)       | 33.2%                        | 22.6                                 | 22.6 | 23.0 |
|                                           | 3rd             | 2,300 (1,940 – 2,710)                             | 1,850 (1,490 – 2,310)    | 1,470 (629 – 3,110)   | 836 (-799 – 1,720)         | 36.3%                        | 20.8                                 | 20.7 | 20.2 |
|                                           | 4th             | 1,940 (1,580 – 2,360)                             | 1,550 (1,220 – 1,980)    | 1,210 (511 – 2,600)   | 736 (-624 – 1,490)         | 37.9%                        | 17.5                                 | 17.4 | 16.6 |
|                                           | 5th             | 1,520 (1,100 – 2,050)                             | 1,220 (852 – 1,710)      | 966 (398 – 2,130)     | 559 (-546 – 1,230)         | 36.7%                        | 13.8                                 | 13.7 | 13.3 |

Continued on next page

Absolute decline: wealth quintile-specific under-5 deaths (1990) - wealth quintile-specific under-5 deaths (2016).

Percentage decline: absolute decline over wealth quintile-specific under-5 deaths (1990) × 100.

Share of total death (in percentage): wealth quintile-specific under-5 deaths over the total under-5 deaths × 100.

Table 9 – continued from previous page

|                             | Wealth Quintile | number of wealth quintile-specific under-5 deaths |                          |                          |                            |                              | Share of total death (in percentage) |      |      |
|-----------------------------|-----------------|---------------------------------------------------|--------------------------|--------------------------|----------------------------|------------------------------|--------------------------------------|------|------|
|                             |                 | 1990                                              | 2000                     | 2016                     | Absolute decline 1990–2016 | Percentage decline 1990–2016 | 1990                                 | 2000 | 2016 |
| Uganda                      | 1st             | 32,100 (28,600 – 35,700)                          | 42,200 (38,000 – 46,400) | 22,900 (18,500 – 27,900) | 9,180 (3,370 – 14,400)     | 28.6%                        | 22.4                                 | 22.1 | 25.4 |
|                             | 2nd             | 30,500 (27,600 – 33,700)                          | 40,400 (36,600 – 44,200) | 20,400 (16,800 – 24,500) | 10,100 (5,290 – 14,800)    | 33.1%                        | 21.3                                 | 21.2 | 22.6 |
|                             | 3rd             | 29,100 (26,800 – 31,500)                          | 38,500 (35,400 – 41,600) | 17,700 (14,800 – 20,900) | 11,400 (7,730 – 14,900)    | 39.2%                        | 20.3                                 | 20.2 | 19.7 |
|                             | 4th             | 29,600 (26,600 – 33,000)                          | 39,900 (36,100 – 44,000) | 15,900 (13,000 – 19,300) | 13,800 (9,510 – 17,900)    | 46.6%                        | 20.7                                 | 21.0 | 17.6 |
|                             | 5th             | 21,800 (19,200 – 24,600)                          | 29,700 (26,500 – 33,100) | 13,100 (10,400 – 16,300) | 8,680 (4,940 – 12,300)     | 39.8%                        | 15.2                                 | 15.6 | 14.6 |
| Ukraine                     | 1st             | 3,470 (2,790 – 4,330)                             | 2,050 (1,650 – 2,500)    | 1,180 (963 – 1,430)      | 2,290 (1,720 – 3,040)      | 65.9%                        | 27.0                                 | 27.1 | 27.3 |
|                             | 2nd             | 2,970 (2,500 – 3,550)                             | 1,740 (1,470 – 2,040)    | 1,000 (856 – 1,150)      | 1,960 (1,530 – 2,510)      | 66.0%                        | 23.1                                 | 23.0 | 23.1 |
|                             | 3rd             | 2,590 (2,240 – 3,030)                             | 1,520 (1,330 – 1,750)    | 872 (774 – 972)          | 1,720 (1,390 – 2,130)      | 66.4%                        | 20.1                                 | 20.1 | 20.1 |
|                             | 4th             | 2,110 (1,710 – 2,580)                             | 1,240 (1,010 – 1,490)    | 702 (567 – 835)          | 1,400 (1,070 – 1,840)      | 66.4%                        | 16.4                                 | 16.3 | 16.2 |
|                             | 5th             | 1,730 (1,260 – 2,360)                             | 1,010 (732 – 1,380)      | 580 (424 – 772)          | 1,150 (782 – 1,660)        | 66.5%                        | 13.4                                 | 13.4 | 13.3 |
| United Republic of Tanzania | 1st             | 37,000 (32,700 – 41,500)                          | 36,500 (33,000 – 40,400) | 26,100 (20,500 – 33,200) | 10,900 (2,960 – 17,700)    | 29.5%                        | 19.2                                 | 20.2 | 22.2 |
|                             | 2nd             | 44,600 (40,600 – 49,100)                          | 40,600 (37,000 – 44,400) | 26,600 (21,100 – 33,600) | 18,100 (10,400 – 24,900)   | 40.6%                        | 23.2                                 | 22.5 | 22.7 |
|                             | 3rd             | 40,900 (37,700 – 44,100)                          | 38,500 (35,700 – 41,600) | 23,900 (19,300 – 29,900) | 16,900 (10,500 – 22,200)   | 41.4%                        | 21.3                                 | 21.3 | 20.4 |
|                             | 4th             | 39,100 (35,100 – 43,400)                          | 35,000 (31,700 – 38,600) | 21,000 (16,600 – 26,700) | 18,100 (11,400 – 24,000)   | 46.3%                        | 20.4                                 | 19.4 | 17.9 |
|                             | 5th             | 30,500 (26,700 – 34,700)                          | 30,000 (26,700 – 33,600) | 19,700 (15,400 – 25,200) | 10,900 (4,380 – 16,500)    | 35.7%                        | 15.9                                 | 16.6 | 16.8 |
| Uzbekistan                  | 1st             | 11,300 (9,270 – 13,600)                           | 8,160 (6,580 – 10,000)   | 3,890 (3,020 – 4,940)    | 7,410 (5,690 – 9,260)      | 65.6%                        | 22.3                                 | 22.5 | 24.5 |
|                             | 2nd             | 11,700 (9,920 – 13,800)                           | 8,440 (7,000 – 10,200)   | 3,660 (2,920 – 4,500)    | 8,080 (6,570 – 9,790)      | 68.9%                        | 23.1                                 | 23.3 | 23.0 |
|                             | 3rd             | 10,400 (8,940 – 12,100)                           | 7,410 (6,210 – 8,810)    | 3,170 (2,570 – 3,860)    | 7,260 (6,120 – 8,540)      | 69.6%                        | 20.6                                 | 20.4 | 20.0 |
|                             | 4th             | 8,910 (7,430 – 10,600)                            | 6,330 (5,180 – 7,740)    | 2,640 (2,070 – 3,300)    | 6,270 (5,030 – 7,710)      | 70.4%                        | 17.6                                 | 17.5 | 16.6 |
|                             | 5th             | 8,330 (6,660 – 10,300)                            | 5,940 (4,710 – 7,490)    | 2,520 (1,890 – 3,310)    | 5,810 (4,430 – 7,460)      | 69.7%                        | 16.4                                 | 16.4 | 15.9 |
| Vanuatu                     | 1st             | 49 (38 – 61)                                      | 46 (36 – 57)             | 51 (32 – 79)             | -2 (-30 – 19)              | -4.1%                        | 26.3                                 | 26.5 | 26.5 |
|                             | 2nd             | 43 (35 – 53)                                      | 40 (33 – 48)             | 44 (29 – 68)             | -1 (-25 – 17)              | -2.3%                        | 23.4                                 | 23.3 | 23.3 |
|                             | 3rd             | 37 (31 – 45)                                      | 35 (29 – 42)             | 39 (25 – 58)             | -1 (-22 – 14)              | -2.7%                        | 20.3                                 | 20.2 | 20.2 |
|                             | 4th             | 31 (25 – 39)                                      | 29 (23 – 36)             | 32 (21 – 50)             | -1 (-19 – 13)              | -3.2%                        | 17.0                                 | 17.0 | 17.0 |
|                             | 5th             | 24 (17 – 33)                                      | 22 (16 – 31)             | 25 (15 – 41)             | -1 (-15 – 10)              | -4.2%                        | 12.9                                 | 13.0 | 13.0 |
| Viet Nam                    | 1st             | 28,100 (23,800 – 32,700)                          | 12,700 (10,200 – 15,500) | 9,960 (8,050 – 12,500)   | 18,100 (13,900 – 22,600)   | 64.5%                        | 28.4                                 | 29.3 | 29.3 |
|                             | 2nd             | 22,800 (20,000 – 26,100)                          | 9,940 (8,020 – 12,000)   | 7,750 (6,360 – 9,610)    | 15,100 (11,900 – 18,300)   | 66.1%                        | 23.1                                 | 22.9 | 22.8 |
|                             | 3rd             | 19,900 (17,700 – 22,200)                          | 8,600 (7,060 – 10,200)   | 6,740 (5,650 – 8,190)    | 13,100 (10,800 – 15,400)   | 65.9%                        | 20.1                                 | 19.8 | 19.8 |
|                             | 4th             | 16,300 (14,000 – 18,900)                          | 7,070 (5,660 – 8,610)    | 5,490 (4,400 – 6,950)    | 10,800 (8,290 – 13,400)    | 66.3%                        | 16.5                                 | 16.3 | 16.1 |
|                             | 5th             | 11,800 (9,150 – 15,000)                           | 5,130 (3,800 – 6,770)    | 4,090 (3,010 – 5,580)    | 7,710 (5,460 – 10,400)     | 65.4%                        | 11.9                                 | 11.8 | 12.0 |
| Yemen                       | 1st             | 19,400 (16,400 – 22,800)                          | 17,600 (15,100 – 20,600) | 13,100 (9,110 – 18,700)  | 6,330 (584 – 11,000)       | 32.6%                        | 25.5                                 | 26.7 | 27.5 |
|                             | 2nd             | 17,200 (15,200 – 19,500)                          | 14,900 (13,000 – 16,900) | 11,100 (7,780 – 15,700)  | 6,160 (1,410 – 9,780)      | 35.7%                        | 22.6                                 | 22.6 | 23.3 |
|                             | 3rd             | 16,100 (14,600 – 17,700)                          | 13,900 (12,400 – 15,400) | 9,720 (6,900 – 13,400)   | 6,420 (2,550 – 9,430)      | 39.8%                        | 21.2                                 | 21.0 | 20.4 |
|                             | 4th             | 14,100 (12,300 – 16,200)                          | 11,700 (10,100 – 13,500) | 8,140 (5,610 – 11,500)   | 6,010 (2,460 – 8,950)      | 42.5%                        | 18.6                                 | 17.7 | 17.1 |
|                             | 5th             | 9,300 (7,190 – 11,800)                            | 7,880 (6,120 – 10,000)   | 5,550 (3,670 – 8,230)    | 3,740 (1,090 – 6,140)      | 40.2%                        | 12.2                                 | 11.9 | 11.7 |
| Zambia                      | 1st             | 13,600 (12,300 – 15,100)                          | 15,500 (14,000 – 17,200) | 9,420 (6,730 – 12,900)   | 4,190 (646 – 7,220)        | 30.8%                        | 21.6                                 | 21.4 | 24.2 |
|                             | 2nd             | 13,800 (12,500 – 15,200)                          | 15,700 (14,200 – 17,300) | 8,760 (6,270 – 11,900)   | 5,050 (1,790 – 7,860)      | 36.6%                        | 21.9                                 | 21.7 | 22.5 |
|                             | 3rd             | 13,000 (12,000 – 14,100)                          | 15,100 (13,900 – 16,500) | 7,910 (5,740 – 10,700)   | 5,130 (2,290 – 7,520)      | 39.3%                        | 20.7                                 | 20.9 | 20.3 |
|                             | 4th             | 13,000 (11,700 – 14,400)                          | 14,500 (13,100 – 16,100) | 6,840 (4,900 – 9,300)    | 6,160 (3,460 – 8,480)      | 47.4%                        | 20.6                                 | 20.2 | 17.6 |
|                             | 5th             | 9,680 (8,550 – 10,900)                            | 11,400 (10,100 – 12,800) | 5,950 (4,210 – 8,160)    | 3,730 (1,300 – 5,730)      | 38.6%                        | 15.3                                 | 15.8 | 15.3 |
| Zimbabwe                    | 1st             | 6,160 (5,330 – 7,040)                             | 8,520 (7,510 – 9,640)    | 7,200 (5,360 – 9,380)    | -1,040 (-3,320 – 871)      | -16.9%                       | 21.9                                 | 22.1 | 24.1 |
|                             | 2nd             | 6,230 (5,500 – 7,010)                             | 8,430 (7,500 – 9,460)    | 6,820 (5,160 – 8,820)    | -591 (-2,640 – 1,170)      | -9.5%                        | 22.2                                 | 21.8 | 22.8 |
|                             | 3rd             | 5,890 (5,290 – 6,520)                             | 8,190 (7,380 – 9,060)    | 6,130 (4,710 – 7,890)    | -244 (-2,000 – 1,240)      | -4.1%                        | 20.9                                 | 21.2 | 20.5 |
|                             | 4th             | 5,360 (4,700 – 6,100)                             | 7,310 (6,440 – 8,240)    | 5,290 (4,000 – 6,920)    | 73 (-1,570 – 1,460)        | 1.4%                         | 19.1                                 | 18.9 | 17.7 |
|                             | 5th             | 4,470 (3,810 – 5,200)                             | 6,180 (5,320 – 7,090)    | 4,440 (3,300 – 5,820)    | 31 (-1,370 – 1,270)        | 0.7%                         | 15.9                                 | 16.0 | 14.9 |

Absolute decline: wealth quintile-specific under-5 deaths (1990) - wealth quintile-specific under-5 deaths (2016).

Percentage decline: absolute decline over wealth quintile-specific under-5 deaths (1990) × 100.

Share of total death (in percentage): wealth quintile-specific under-5 deaths over the total under-5 deaths × 100.



Table 10: **Estimates and uncertainty intervals for inequality indexes, for the 99 countries with empirical data.** Estimates and 90% uncertainty intervals for (i) difference in 1st and 5th wealth quintile-specific U5MR in 1990 and 2016; (ii) ratio of 1st to 5th wealth quintile-specific U5MR in 1990 and 2016; (iii) concentration index in 1990 and 2016; and (iv) slope inequality index in 1990 and 2016; for the 99 countries with empirical data. Numbers in brackets are 90% uncertainty intervals. §: change of ratio is significantly different from zero. ¶: point estimates of ratio < 1.5 in 2016. †: point estimates of ratio > 2.5 in 2016. Countries are ordered alphabetically.

|                                   | Difference*<br>(deaths per 1000 livebirths) |                     | Ratio†             |                    | Concentration index<br>(× 100) |                       | Slope inequality index<br>(deaths per 1000 livebirths) |                        |
|-----------------------------------|---------------------------------------------|---------------------|--------------------|--------------------|--------------------------------|-----------------------|--------------------------------------------------------|------------------------|
|                                   | 1990                                        | 2016                | 1990               | 2016               | 1990                           | 2016                  | 1990                                                   | 2016                   |
| Afghanistan                       | 84.5 (45.7 – 124.2)                         | 45.1 (29.9 – 61.6)  | 1.72 (1.34 – 2.20) | 1.99 (1.62 – 2.42) | -8.7 (-12.4 – -4.9)            | -12.4 (-15.4 – -9.1)  | -95.9 (-138.6 – -53.5)                                 | -54.4 (-72.6 – -37.5)  |
| Albania                           | 21.7 (8.0 – 35.0)                           | 8.3 (2.6 – 18.0)    | 1.78 (1.23 – 2.57) | 1.88 (1.27 – 2.80) | -11.3 (-16.5 – -5.7)           | -12.6 (-18.7 – -6.4)  | -28.2 (-42.0 – -13.9)                                  | -10.7 (-22.2 – -4.1)   |
| Algeria                           | 29.1 (14.3 – 43.3)                          | 16.0 (8.5 – 23.5)   | 1.84 (1.34 – 2.53) | 1.89 (1.39 – 2.57) | -11.9 (-16.7 – -6.9)           | -12.4 (-17.1 – -7.5)  | -36.4 (-51.0 – -20.9)                                  | -19.6 (-27.4 – -11.8)  |
| Angola                            | 61.3 (15.2 – 108.2)                         | 37.8 (13.5 – 78.2)  | 1.36 (1.08 – 1.72) | 1.62 (1.24 – 2.12) | -5.4 (-9.0 – -1.9)             | -9.4 (-13.5 – -5.1)   | -75.2 (-126.5 – -25.9)                                 | -48.6 (-95.0 – -19.6)  |
| Armenia                           | 33.0 (16.0 – 49.3)                          | 9.8 (4.6 – 16.2)    | 2.02 (1.40 – 2.93) | 2.11 (1.42 – 3.19) | -13.2 (-18.3 – -7.6)           | -14.5 (-20.7 – -8.2)  | -41 (-57.7 – -23.3)                                    | -12.2 (-19.1 – -6.5)   |
| Azerbaijan                        | 48.7 (22.7 – 74.3)                          | 19.9 (8.6 – 38.4)   | 1.76 (1.29 – 2.40) | 1.99 (1.43 – 2.84) | -10.0 (-14.5 – -5.4)           | -12.8 (-17.7 – -7.6)  | -59.2 (-85.9 – -31.6)                                  | -24.7 (-46.5 – -11.9)  |
| Bangladesh                        | 76.8 (59.9 – 93.6)                          | 23.1 (16.0 – 30.4)  | 1.80 (1.58 – 2.04) | 2.04 (1.66 – 2.51) | -10.3 (-12.4 – -8.3)           | -13.3 (-16.6 – -9.9)  | -93.0 (-111.9 – -74.6)                                 | -28.4 (-36.3 – -20.9)  |
| Belarus                           | 10.8 (4.8 – 16.5)                           | 2.8 (1.2 – 4.2)     | 2.07 (1.37 – 3.11) | 2.08 (1.36 – 3.14) | -14.1 (-20.3 – -7.7)           | -14.2 (-20.5 – -7.6)  | -13.4 (-19.3 – -7.3)                                   | -3.5 (-5.0 – -1.8)     |
| Belize                            | 25.6 (11.1 – 39.8)                          | 10.6 (4.7 – 16.5)   | 2.00 (1.34 – 2.98) | 2.08 (1.37 – 3.17) | -13.1 (-18.7 – -7.1)           | -14.2 (-20.5 – -7.5)  | -32.0 (-46.4 – -16.9)                                  | -13.2 (-19.3 – -7.0)   |
| Benin                             | 71.1 (42.4 – 98.9)                          | 49.6 (27.7 – 78.4)  | 1.56 (1.30 – 1.85) | 1.74 (1.39 – 2.19) | -7.6 (-10.3 – -4.9)            | -10.2 (-13.8 – -6.7)  | -84.8 (-115.7 – -54.5)                                 | -62.3 (-94.5 – -37.9)  |
| Bhutan                            | 86.3 (47.0 – 126.3)                         | 28.1 (15.7 – 43.8)  | 2.10 (1.48 – 3.00) | 2.49 (1.74 – 3.56) | -12.5 (-17.4 – -7.3)           | -16.5 (-21.6 – -11.2) | -99.7 (-140.9 – -58.3)                                 | -33.4 (-50.5 – -19.8)  |
| Bolivia (Plurinational State of)‡ | 107.1 (89.4 – 125.3)                        | 36.5 (23.3 – 53.6)  | 2.68 (2.29 – 3.15) | 2.96 (2.31 – 3.77) | -15.9 (-18.3 – -13.6)          | -18.8 (-22.4 – -14.9) | -123.1 (-143.0 – -103.4)                               | -43.4 (-62.9 – -28.2)  |
| Brazil‡                           | 57.6 (39.4 – 75.4)                          | 14.3 (8.6 – 20.8)   | 2.58 (1.88 – 3.57) | 2.64 (1.81 – 3.89) | -17.0 (-21.4 – -12.3)          | -18.1 (-24.0 – -12.2) | -68.2 (-87 – -49.2)                                    | -17.0 (-24.1 – -11.0)  |
| Burkina Faso                      | 61.8 (37.4 – 85.5)                          | 41.5 (23.4 – 63.7)  | 1.42 (1.24 – 1.62) | 1.70 (1.38 – 2.10) | -5.7 (-7.8 – -3.5)             | -9.9 (-13.3 – -6.6)   | -70.4 (-97.3 – -43.2)                                  | -52.5 (-77.7 – -32.6)  |
| Burundi                           | 92.0 (51.2 – 132.9)                         | 48.4 (27.5 – 71.9)  | 1.82 (1.40 – 2.36) | 2.05 (1.54 – 2.70) | -9.8 (-13.7 – -5.8)            | -13 (-17.2 – -8.6)    | -104.7 (-147.8 – -61.5)                                | -58.4 (-84.1 – -35.6)  |
| Cambodia‡                         | 86.3 (64.3 – 108.4)                         | 27.3 (15.4 – 46.1)  | 2.42 (1.94 – 3.01) | 2.76 (2.11 – 3.57) | -13.6 (-16.7 – -10.4)          | -16.9 (-20.6 – -13.0) | -98.4 (-122.3 – -74.5)                                 | -32.4 (-54.1 – -18.8)  |
| Cameroon                          | 92.4 (69.1 – 115.8)                         | 54.5 (33.2 – 80.2)  | 1.99 (1.68 – 2.35) | 2.05 (1.60 – 2.59) | -12.2 (-14.9 – -9.5)           | -13.2 (-16.9 – -9.3)  | -109.4 (-135 – -84.4)                                  | -65.5 (-93.8 – -42.4)  |
| Central African Republic          | 81.0 (55.4 – 107.5)                         | 71.4 (38.2 – 121.7) | 1.68 (1.43 – 1.98) | 1.86 (1.48 – 2.32) | -9.2 (-11.7 – -6.7)            | -11.1 (-14.5 – -7.4)  | -100.4 (-130.2 – -71.3)                                | -85.5 (-143.0 – -47.4) |
| Chad¶                             | -15.1 (-43.3 – 13.3)                        | 10.4 (-11.3 – 34.9) | 0.92 (0.79 – 1.07) | 1.09 (0.91 – 1.32) | 0.2 (-2.2 – 2.6)               | -2.7 (-5.9 – 0.3)     | 2.3 (-29.4 – 34.3)                                     | -21.2 (-47.8 – 2.3)    |
| Colombia                          | 23.0 (15.1 – 30.7)                          | 11.0 (6.4 – 16.3)   | 1.95 (1.55 – 2.45) | 2.04 (1.54 – 2.69) | -13.0 (-16.6 – -9.2)           | -14.5 (-19.1 – -9.8)  | -28.6 (-36.8 – -20.2)                                  | -13.9 (-19.9 – -8.9)   |
| Comoros                           | 57.0 (25.5 – 88.4)                          | 35.8 (12.1 – 80.9)  | 1.62 (1.24 – 2.11) | 1.66 (1.23 – 2.20) | -9.0 (-13.0 – -4.9)            | -9.9 (-14.5 – -5.2)   | -70.9 (-104.2 – -37.2)                                 | -45.4 (-99.5 – -17.9)  |
| Congo                             | 34.4 (12.7 – 56.2)                          | 23.2 (9.5 – 39.8)   | 1.50 (1.16 – 1.96) | 1.58 (1.22 – 2.06) | -8.0 (-11.9 – -4.0)            | -9.3 (-13.3 – -5.3)   | -45.7 (-68.2 – -22.5)                                  | -31.5 (-50.3 – -16.0)  |
| Cote d'Ivoire                     | 80.9 (58.8 – 104.7)                         | 50.0 (27.9 – 76.8)  | 1.80 (1.54 – 2.13) | 1.78 (1.41 – 2.25) | -10.1 (-12.7 – -7.6)           | -10.7 (-14.3 – -6.9)  | -95.3 (-120.5 – -70.7)                                 | -61.3 (-91.8 – -36.5)  |
| Democratic Republic of the Congo  | 104.2 (70.7 – 139.5)                        | 59.0 (35.0 – 89.3)  | 1.94 (1.57 – 2.39) | 2.01 (1.59 – 2.51) | -10.1 (-13.2 – -7.0)           | -11.9 (-15.4 – -8.3)  | -116.5 (-154.1 – -78.4)                                | -70.4 (-105.1 – -43.1) |
| Dominican Republic                | 39.8 (26.0 – 52.9)                          | 19.9 (11.7 – 30.3)  | 2.05 (1.59 – 2.63) | 1.99 (1.53 – 2.59) | -13.0 (-16.6 – -9.1)           | -12.8 (-16.8 – -8.7)  | -48.7 (-62.8 – -33.9)                                  | -24.6 (-36.4 – -15.3)  |
| Egypt‡                            | 77.3 (63.5 – 91.3)                          | 20.1 (13.8 – 28.0)  | 2.69 (2.24 – 3.24) | 2.55 (2.01 – 3.22) | -16.7 (-19.4 – -14.0)          | -16.5 (-20.1 – -12.6) | -89.7 (-104.7 – -74.9)                                 | -23.5 (-32.2 – -16.5)  |
| El Salvador                       | 36.3 (15.6 – 56.6)                          | 10.9 (4.8 – 18.8)   | 1.90 (1.31 – 2.78) | 2.08 (1.41 – 3.08) | -12.2 (-17.6 – -6.5)           | -14.5 (-20.3 – -8.2)  | -45.3 (-66.4 – -23.9)                                  | -13.6 (-22.5 – -6.9)   |
| Equatorial Guinea¶                | 33.8 (-14.8 – 80.4)                         | 29.7 (2.8 – 61.5)   | 1.20 (0.93 – 1.53) | 1.37 (1.03 – 1.85) | -3.5 (-7.6 – 0.8)              | -7.0 (-11.9 – -2.0)   | -41.9 (-92.6 – 9.7)                                    | -39.7 (-75.2 – -10.7)  |
| Eritrea                           | 52.9 (17.6 – 89.0)                          | 24.4 (10.7 – 44.7)  | 1.54 (1.15 – 2.10) | 1.88 (1.35 – 2.63) | -6.8 (-10.8 – -2.7)            | -11.4 (-16.1 – -6.6)  | -64.2 (-103.7 – -25.8)                                 | -31.7 (-55.7 – -16.0)  |
| Ethiopia                          | 29.2 (-6.1 – 64.4)                          | 23.7 (10.9 – 38.7)  | 1.18 (0.97 – 1.44) | 1.54 (1.23 – 1.94) | -2.4 (-5.5 – 0.7)              | -8.5 (-12.3 – -4.8)   | -30.9 (-69.5 – 8.7)                                    | -31.2 (-48.3 – -16.8)  |
| Gabon                             | 39.8 (16.7 – 63.4)                          | 25.0 (11.0 – 42.7)  | 1.62 (1.22 – 2.16) | 1.77 (1.31 – 2.37) | -9.0 (-12.9 – -4.8)            | -11.1 (-15.3 – -6.5)  | -51.8 (-77.1 – -27.4)                                  | -32.8 (-53.4 – -17.0)  |
| Georgia                           | 29.9 (13.9 – 46.1)                          | 7.5 (3.4 – 11.7)    | 1.98 (1.36 – 2.93) | 2.08 (1.39 – 3.15) | -12.9 (-18.3 – -7.2)           | -14.3 (-20.3 – -7.9)  | -38.1 (-55.0 – -21.1)                                  | -9.5 (-14.1 – -5.2)    |
| Ghana                             | 66.8 (46.5 – 87.2)                          | 33.2 (18.8 – 50.0)  | 1.75 (1.47 – 2.09) | 1.77 (1.42 – 2.22) | -10.0 (-12.7 – -7.2)           | -11.0 (-14.6 – -7.3)  | -79.0 (-101.0 – -56.7)                                 | -40.3 (-59.3 – -24.6)  |
| Guatemala                         | 36.0 (18.2 – 52.9)                          | 17.4 (9.8 – 25.9)   | 1.63 (1.27 – 2.09) | 1.93 (1.46 – 2.57) | -9.1 (-12.6 – -5.3)            | -12.7 (-16.8 – -8.4)  | -46.3 (-64.6 – -26.9)                                  | -22.6 (-31.9 – -14.5)  |
| Guinea                            | 110.3 (69.3 – 151.6)                        | 57.1 (37.4 – 81.6)  | 1.68 (1.39 – 2.02) | 1.99 (1.61 – 2.45) | -8.8 (-11.7 – -5.7)            | -12.1 (-15.4 – -8.7)  | -128.7 (-174 – -83.6)                                  | -67.2 (-93.5 – -45.7)  |
| Guinea-Bissau                     | 85.8 (45.1 – 127.8)                         | 41.7 (20.4 – 68.6)  | 1.55 (1.27 – 1.90) | 1.66 (1.32 – 2.09) | -7.8 (-10.9 – -4.6)            | -9.7 (-13.3 – -6.0)   | -106.2 (-153.1 – -61.4)                                | -53.3 (-84.0 – -29.0)  |
| Guyana                            | 22.6 (3.0 – 40.4)                           | 13.3 (2.3 – 26.5)   | 1.49 (1.05 – 2.07) | 1.54 (1.09 – 2.17) | -8.4 (-13.3 – -3.1)            | -9.2 (-14.2 – -3.7)   | -31.6 (-50.1 – -11.3)                                  | -18.6 (-33.9 – -6.8)   |
| Haiti                             | 51.0 (25.9 – 75.4)                          | 31.9 (16.5 – 50.5)  | 1.48 (1.21 – 1.78) | 1.67 (1.32 – 2.12) | -6.9 (-9.8 – -3.9)             | -9.7 (-13.3 – -6.0)   | -62.9 (-89.7 – -35.6)                                  | -40.5 (-61.5 – -23.4)  |
| Honduras                          | 44.4 (28.8 – 60.0)                          | 15.9 (9.6 – 23.9)   | 2.25 (1.69 – 3.01) | 2.38 (1.76 – 3.22) | -14.7 (-18.9 – -10.3)          | -16.2 (-20.7 – -11.5) | -53.4 (-69.9 – -37.2)                                  | -18.9 (-27.8 – -12.0)  |
| India‡                            | 108.0 (97.7 – 118.4)                        | 39.1 (29.5 – 49.0)  | 2.75 (2.51 – 3.01) | 2.78 (2.19 – 3.47) | -17.2 (-18.6 – -15.9)          | -17.9 (-21.4 – -14.2) | -135.6 (-147.2 – -124.1)                               | -48.1 (-58.7 – -37.3)  |
| Indonesia‡                        | 72.0 (55.0 – 89.4)                          | 24.5 (16.9 – 33.8)  | 2.52 (2.01 – 3.18) | 2.65 (2.07 – 3.42) | -15.7 (-19 – -12.3)            | -17.3 (-21.1 – -13.4) | -82.5 (-100.9 – -64.3)                                 | -28.5 (-38.8 – -20.3)  |
| Iraq¶                             | 16.7 (1.2 – 32.2)                           | 9.5 (1.3 – 18.9)    | 1.36 (1.02 – 1.82) | 1.35 (1.05 – 1.76) | -7.1 (-11.9 – -2.3)            | -7.0 (-11.3 – -2.6)   | -24.2 (-40.5 – -7.8)                                   | -13.7 (-24.1 – -4.8)   |
| Jordan                            | 18.3 (10.5 – 26.4)                          | 10.0 (4.5 – 17.0)   | 1.68 (1.34 – 2.12) | 1.77 (1.32 – 2.39) | -10.0 (-13.6 – -6.3)           | -11.6 (-16.5 – -6.6)  | -22.8 (-31.4 – -14.3)                                  | -12.8 (-20.7 – -6.7)   |

Continued on next page

\*: Difference in 1st and 5th wealth quintile-specific U5MR.

†: Ratio of 1st to 5th wealth quintile-specific U5MR.

Table 10 – continued from previous page

|                                           | Difference*<br>(deaths per 1000 livebirths) |                     | Ratio†             |                    | Concentration index<br>(× 100) |                       | Slope inequality index<br>(deaths per 1000 livebirths) |                         |
|-------------------------------------------|---------------------------------------------|---------------------|--------------------|--------------------|--------------------------------|-----------------------|--------------------------------------------------------|-------------------------|
|                                           | 1990                                        | 2016                | 1990               | 2016               | 1990                           | 2016                  | 1990                                                   | 2016                    |
| Kazakhstan                                | 26.8 (12.2 – 40.8)                          | 6.8 (3.1 – 10.7)    | 1.73 (1.28 – 2.33) | 1.85 (1.31 – 2.64) | -10.8 (-15.1 – -6.2)           | -12.5 (-18.1 – -6.8)  | -35.2 (-49.9 – -19.9)                                  | -8.9 (-12.9 – -4.8)     |
| Kenya                                     | 53.3 (37.9 – 69.3)                          | 23.3 (12.8 – 35.0)  | 1.74 (1.48 – 2.05) | 1.63 (1.32 – 2.01) | -11.2 (-13.9 – -8.5)           | -9.8 (-13.2 – -6.2)   | -68.6 (-85.9 – -51.6)                                  | -30.2 (-43.4 – -18.7)   |
| Kyrgyz Republic                           | 35.2 (16.6 – 53.3)                          | 13.4 (6.8 – 19.8)   | 1.75 (1.30 – 2.34) | 1.90 (1.38 – 2.61) | -10.9 (-15.3 – -6.1)           | -12.8 (-17.9 – -7.6)  | -44.6 (-63.4 – -24.7)                                  | -16.9 (-23.8 – -10.0)   |
| Lao People's Democratic Republic‡         | 111.6 (69.5 – 156.2)                        | 55.6 (34.3 – 83.9)  | 2.32 (1.68 – 3.24) | 2.77 (2.02 – 3.79) | -12.4 (-16.8 – -8.0)           | -16.5 (-20.6 – -12.1) | -125.2 (-172.3 – -79.9)                                | -65.8 (-97.1 – -41.7)   |
| Lesotho¶                                  | 32.3 (12.4 – 52.4)                          | 32.3 (11.1 – 57.9)  | 1.46 (1.15 – 1.84) | 1.45 (1.14 – 1.86) | -7.3 (-11.1 – -3.6)            | -7.0 (-10.7 – -3.1)   | -41.8 (-64.0 – -20.4)                                  | -40.7 (-68.0 – -17.6)   |
| Liberia¶                                  | 28.5 (-33.3 – 92.1)                         | 19.1 (2.8 – 37.9)   | 1.12 (0.88 – 1.46) | 1.32 (1.04 – 1.67) | -2.4 (-6.5 – 1.7)              | -6.4 (-10.3 – -2.3)   | -38.3 (-105.9 – 27.0)                                  | -26.8 (-47.8 – -9.4)    |
| Madagascar                                | 90.5 (63.4 – 117.5)                         | 35.0 (20.8 – 54.7)  | 1.94 (1.58 – 2.36) | 2.29 (1.76 – 2.97) | -10.4 (-13.3 – -7.5)           | -14.8 (-18.6 – -10.9) | -104.1 (-133.6 – -73.8)                                | -42.8 (-65.3 – -26.7)   |
| Malawi                                    | 67.2 (37.2 – 97.3)                          | 23.3 (12.5 – 36.3)  | 1.38 (1.20 – 1.60) | 1.56 (1.28 – 1.89) | -5.1 (-7.3 – -2.8)             | -9.1 (-12.2 – -5.9)   | -73.7 (-106.6 – -40.3)                                 | -31.4 (-46.5 – -19.1)   |
| Maldives                                  | 48.4 (15.9 – 79.4)                          | 5.8 (2.4 – 9.5)     | 1.74 (1.19 – 2.54) | 2.01 (1.34 – 3.03) | -10.2 (-15.6 – -4.3)           | -13.7 (-19.8 – -7.2)  | -59.9 (-92.5 – -25.2)                                  | -7.3 (-11.3 – -3.7)     |
| Mali                                      | 108.1 (78.1 – 137.5)                        | 64.5 (35.1 – 109.1) | 1.63 (1.43 – 1.86) | 1.94 (1.59 – 2.38) | -7.6 (-9.6 – -5.5)             | -11 (-14.1 – -7.9)    | -120.7 (-153.4 – -87.5)                                | -76.3 (-127.6 – -42.2)  |
| Mauritania                                | 62.0 (31.8 – 92.4)                          | 45.6 (20.4 – 90.3)  | 1.74 (1.33 – 2.29) | 1.78 (1.38 – 2.28) | -10.3 (-14.5 – -6.0)           | -11.2 (-15.1 – -7.0)  | -74.9 (-107.1 – -43.8)                                 | -56.8 (-109.5 – -27.1)  |
| Mongolia                                  | 66.3 (40.4 – 91.6)                          | 14.9 (8.4 – 24.4)   | 1.92 (1.49 – 2.47) | 2.35 (1.74 – 3.20) | -12.0 (-15.8 – -8.1)           | -16.5 (-21.3 – -11.7) | -81.5 (-108.8 – -54.7)                                 | -18.4 (-29.2 – -10.8)   |
| Morocco‡                                  | 63.9 (47.7 – 80.2)                          | 23.9 (14.9 – 35.7)  | 2.52 (1.99 – 3.19) | 2.64 (1.96 – 3.56) | -15.3 (-18.7 – -12.0)          | -17 (-21.3 – -12.5)   | -76.4 (-94.2 – -59.2)                                  | -28.8 (-42.3 – -18.5)   |
| Mozambique                                | 83.2 (41.0 – 126.9)                         | 32.6 (17.3 – 52.3)  | 1.45 (1.20 – 1.76) | 1.61 (1.31 – 1.96) | -6.3 (-9.3 – -3.2)             | -9.1 (-12.5 – -5.8)   | -97.0 (-144.3 – -49.9)                                 | -40.7 (-62.9 – -23.8)   |
| Myanmar                                   | 61.5 (22.8 – 97.7)                          | 33.6 (16.0 – 52.7)  | 1.79 (1.23 – 2.61) | 2.03 (1.41 – 2.93) | -10.4 (-15.5 – -4.9)           | -13.4 (-18.3 – -7.9)  | -74.8 (-112 – -35.2)                                   | -42.4 (-63.2 – -23.5)   |
| Namibia                                   | 32.5 (18.5 – 46.6)                          | 26.8 (14.2 – 44.8)  | 1.66 (1.33 – 2.07) | 1.91 (1.47 – 2.51) | -9.3 (-12.5 – -5.9)            | -11.9 (-16.0 – -7.9)  | -41.6 (-56.7 – -26.6)                                  | -33.7 (-54.4 – -19.1)   |
| Nepal                                     | 59.0 (36.7 – 81.3)                          | 21.9 (13.7 – 31.0)  | 1.62 (1.35 – 1.95) | 1.99 (1.56 – 2.53) | -8.1 (-10.8 – -5.4)            | -12.9 (-16.6 – -9.1)  | -71.5 (-96.0 – -47.2)                                  | -27.7 (-38.1 – -18.7)   |
| Nicaragua                                 | 39.8 (23.9 – 55.8)                          | 13.9 (6.6 – 25.6)   | 1.96 (1.48 – 2.59) | 2.15 (1.53 – 3.04) | -12.0 (-15.7 – -7.9)           | -14.2 (-19.2 – -8.9)  | -50.4 (-67.4 – -33.2)                                  | -17.5 (-31 – -8.9)      |
| Niger¶                                    | 71.4 (29.1 – 116.2)                         | 29.6 (11.6 – 52.6)  | 1.31 (1.11 – 1.54) | 1.44 (1.16 – 1.79) | -4.6 (-7.1 – -2.2)             | -6.9 (-10.1 – -3.5)   | -94.3 (-146.9 – -46.1)                                 | -39.2 (-66.7 – -18.4)   |
| Nigeria                                   | 129.0 (96.9 – 161.9)                        | 82.6 (56.0 – 116.4) | 2.04 (1.72 – 2.39) | 2.44 (2.01 – 2.91) | -11.7 (-14.3 – -9.1)           | -15.6 (-18.4 – -12.6) | -156.0 (-193.1 – -119.8)                               | -101.6 (-142.4 – -70.3) |
| Pakistan                                  | 67.8 (43.0 – 91.8)                          | 46.4 (27.8 – 69.8)  | 1.73 (1.42 – 2.11) | 1.89 (1.49 – 2.40) | -9.5 (-12.5 – -6.4)            | -11.8 (-15.4 – -8.2)  | -82.2 (-108.5 – -55.3)                                 | -58 (-84.3 – -37.5)     |
| Paraguay                                  | 29.4 (16.3 – 42.5)                          | 14.0 (6.0 – 25.9)   | 2.01 (1.44 – 2.85) | 2.11 (1.45 – 3.09) | -12.6 (-17.1 – -7.8)           | -14 (-19.4 – -8.2)    | -36.6 (-50.4 – -22.5)                                  | -17.4 (-31.2 – -8.5)    |
| Peru‡                                     | 79.7 (67.5 – 91.8)                          | 16.1 (11.1 – 22.3)  | 3.04 (2.56 – 3.61) | 3.06 (2.32 – 3.99) | -19.7 (-22.1 – -17.2)          | -20.4 (-24.6 – -16.0) | -98.9 (-112.4 – -85.7)                                 | -19.5 (-27.1 – -13.7)   |
| Philippines‡                              | 57.0 (46.5 – 67.4)                          | 27.1 (18.0 – 38.9)  | 2.86 (2.37 – 3.47) | 2.91 (2.24 – 3.76) | -18.9 (-21.7 – -16.0)          | -18.9 (-22.6 – -14.8) | -68.6 (-79.9 – -57.6)                                  | -32.0 (-45.7 – -21.8)   |
| Republic of Moldova                       | 19.4 (7.0 – 31.3)                           | 10.1 (3.5 – 18.9)   | 1.83 (1.23 – 2.65) | 1.89 (1.25 – 2.78) | -12.0 (-17.5 – -5.7)           | -13.0 (-19 – -6.4)    | -24.7 (-37.3 – -11.8)                                  | -13 (-22.6 – -5.8)      |
| Rwanda§                                   | 28.2 (5.7 – 49.8)                           | 19.5 (9.6 – 34.6)   | 1.23 (1.04 – 1.45) | 1.69 (1.36 – 2.12) | -3.5 (-6.1 – -0.9)             | -10.0 (-13.8 – -6.3)  | -33.2 (-57.3 – -8.4)                                   | -24.1 (-41.6 – -12.5)   |
| Sao Tome and Principe                     | 28.1 (-4.9 – 59.9)                          | 14.7 (3.5 – 28.6)   | 1.31 (0.95 – 1.78) | 1.54 (1.11 – 2.12) | -6.0 (-10.9 – -0.8)            | -9.4 (-14.6 – -4.0)   | -39.4 (-72.3 – -5.3)                                   | -19.9 (-35.2 – -7.7)    |
| Senegal                                   | 92.9 (69.3 – 116.5)                         | 37.5 (26.4 – 51.6)  | 2.08 (1.73 – 2.50) | 2.36 (1.90 – 2.92) | -12.7 (-15.5 – -9.8)           | -15.5 (-18.6 – -12.1) | -111.3 (-136.9 – -85.7)                                | -45.6 (-61.7 – -32.7)   |
| Serbia                                    | 17.9 (7.3 – 28.0)                           | 3.9 (1.5 – 6.4)     | 1.92 (1.29 – 2.84) | 1.98 (1.30 – 3.00) | -12.7 (-18.5 – -6.4)           | -13.6 (-19.9 – -6.9)  | -22.4 (-32.7 – -11.3)                                  | -4.9 (-7.5 – -2.5)      |
| Sierra Leone¶                             | 67.5 (21.4 – 116.1)                         | 32.8 (10.5 – 56.6)  | 1.32 (1.09 – 1.61) | 1.34 (1.10 – 1.61) | -4.1 (-7.3 – -1.0)             | -5.8 (-9.0 – -2.5)    | -67.8 (-119.8 – -16.5)                                 | -41.3 (-67.2 – -16.9)   |
| Somalia                                   | 64.1 (3.9 – 124.4)                          | 55.7 (9.0 – 127.7)  | 1.49 (1.02 – 2.18) | 1.58 (1.08 – 2.29) | -6.8 (-12 – -1.2)              | -8.3 (-13.5 – -2.5)   | -76.6 (-141.6 – -13.6)                                 | -68.3 (-150.1 – -17.7)  |
| South Africa                              | 45.0 (27.8 – 62.2)                          | 34.2 (19.9 – 49.2)  | 2.33 (1.68 – 3.24) | 2.33 (1.64 – 3.35) | -15.1 (-19.5 – -10.3)          | -15.3 (-20.2 – -10.1) | -54.1 (-72.3 – -36.4)                                  | -41.4 (-57 – -26.2)     |
| South Sudan¶                              | 3.9 (-78.0 – 81.9)                          | 10.2 (-18.6 – 40.8) | 1.02 (0.74 – 1.39) | 1.12 (0.83 – 1.49) | -1.2 (-6.2 – 4.2)              | -3.6 (-8.5 – 1.5)     | -18.5 (-100.9 – 66.4)                                  | -20.5 (-54.6 – 9.5)     |
| State of Palestine                        | 28.7 (13.7 – 43.2)                          | 13.6 (6.5 – 22.8)   | 2.00 (1.38 – 2.89) | 2.08 (1.45 – 3.01) | -12.9 (-18.1 – -7.3)           | -13.9 (-19.5 – -8.3)  | -35.9 (-50.9 – -20.3)                                  | -16.9 (-27.2 – -9.3)    |
| Sudan                                     | 55.8 (23.5 – 87.8)                          | 34.5 (19.7 – 51.0)  | 1.62 (1.22 – 2.16) | 1.81 (1.43 – 2.30) | -8.4 (-12.5 – -4.3)            | -10.9 (-14.4 – -7.3)  | -69.2 (-103.6 – -35.0)                                 | -44.5 (-63.2 – -28.3)   |
| Suriname                                  | 35.6 (19.1 – 53.2)                          | 16.1 (6.3 – 35.6)   | 2.25 (1.55 – 3.28) | 2.29 (1.57 – 3.43) | -14.8 (-20.1 – -9.3)           | -15.5 (-21.4 – -9.5)  | -43 (-61.8 – -25.5)                                    | -19.4 (-42.4 – -8.0)    |
| Swaziland                                 | 33.0 (17.1 – 50.3)                          | 35.0 (16.9 – 59.9)  | 1.65 (1.30 – 2.13) | 1.64 (1.31 – 2.10) | -9.8 (-14 – -5.8)              | -9.5 (-13.4 – -5.6)   | -40.3 (-58.8 – -23.3)                                  | -41.7 (-69.5 – -22.1)   |
| Syria                                     | 20.8 (7.9 – 33.0)                           | 10.0 (3.4 – 18.2)   | 1.81 (1.25 – 2.60) | 1.79 (1.22 – 2.63) | -11.5 (-16.8 – -5.9)           | -11.7 (-17.7 – -5.4)  | -26.7 (-39.3 – -13.6)                                  | -12.9 (-21.9 – -5.7)    |
| Tajikistan                                | 36.2 (10.1 – 62.3)                          | 20.4 (7.3 – 39.9)   | 1.41 (1.10 – 1.81) | 1.61 (1.21 – 2.11) | -7.3 (-11.2 – -3.2)            | -10.3 (-14.7 – -5.6)  | -48.6 (-76.4 – -21.3)                                  | -27.6 (-51.5 – -12.4)   |
| Thailand                                  | 23.8 (10.3 – 36.6)                          | 8.4 (3.1 – 16.5)    | 1.96 (1.32 – 2.90) | 2.03 (1.35 – 3.13) | -12.8 (-18.2 – -6.7)           | -13.9 (-20.2 – -7.4)  | -30.1 (-43 – -15.9)                                    | -10.6 (-19.9 – -4.8)    |
| The former Yugoslav Republic of Macedonia | 25.5 (11.9 – 37.8)                          | 9.0 (4.0 – 16.6)    | 2.04 (1.38 – 2.99) | 2.11 (1.42 – 3.19) | -13.6 (-19 – -7.5)             | -14.7 (-20.7 – -8.1)  | -31.5 (-44.1 – -17.4)                                  | -11.2 (-19.8 – -5.8)    |
| The Gambia                                | 70.1 (34.0 – 108.6)                         | 36.7 (17.8 – 65.3)  | 1.62 (1.26 – 2.08) | 1.87 (1.44 – 2.43) | -7.8 (-11.5 – -4.0)            | -11.2 (-15 – -7.2)    | -81.3 (-123.3 – -41.9)                                 | -45.5 (-79.5 – -23.7)   |
| Timor-Leste                               | 67.7 (18.2 – 114.5)                         | 28.8 (13.1 – 50.8)  | 1.57 (1.13 – 2.17) | 1.90 (1.38 – 2.59) | -7.4 (-11.8 – -2.6)            | -11.9 (-16.5 – -7.2)  | -80.5 (-130.5 – -28.9)                                 | -37.0 (-62.0 – -19.1)   |
| Togo                                      | 84.8 (60.5 – 109.1)                         | 58.1 (40.6 – 79.2)  | 1.99 (1.64 – 2.42) | 2.42 (1.95 – 3.02) | -11.1 (-13.8 – -8.2)           | -14.9 (-18.2 – -11.8) | -100.2 (-126.9 – -74.0)                                | -70.6 (-94.4 – -50.7)   |
| Tunisia                                   | 36.4 (15.9 – 56.4)                          | 10.1 (4.4 – 16.8)   | 1.98 (1.34 – 2.91) | 2.13 (1.42 – 3.23) | -12.7 (-18.2 – -6.8)           | -14.6 (-20.6 – -8.1)  | -45.1 (-65.8 – -23.8)                                  | -12.4 (-19.9 – -6.4)    |
| Turkey‡                                   | 70.0 (53.0 – 87.0)                          | 12.8 (8.7 – 16.8)   | 2.78 (2.13 – 3.65) | 2.87 (2.03 – 4.07) | -17.4 (-21 – -13.6)            | -19.0 (-24.2 – -13.5) | -80.6 (-98.7 – -62.5)                                  | -15.1 (-19.3 – -10.7)   |
| Turkmenistan                              | 50.0 (21.2 – 80.6)                          | 34.7 (11.3 – 79.5)  | 1.84 (1.29 – 2.72) | 2.02 (1.40 – 2.96) | -11.3 (-16.7 – -5.7)           | -13.4 (-18.9 – -7.8)  | -61.0 (-92.7 – -30.6)                                  | -42.8 (-96.8 – -15.4)   |

Continued on next page

\*: Difference in 1st and 5th wealth quintile-specific U5MR.

†: Ratio of 1st to 5th wealth quintile-specific U5MR.

Table 10 – continued from previous page

|                              | Difference*<br>(deaths per 1000 livebirths) |                    | Ratio†             |                    | Concentration index<br>(× 100) |                       | Slope inequality index<br>(deaths per 1000 livebirths) |                       |
|------------------------------|---------------------------------------------|--------------------|--------------------|--------------------|--------------------------------|-----------------------|--------------------------------------------------------|-----------------------|
|                              | 1990                                        | 2016               | 1990               | 2016               | 1990                           | 2016                  | 1990                                                   | 2016                  |
| Uganda                       | 62.8 (36.4 – 89.6)                          | 28.8 (16.8 – 42.0) | 1.47 (1.25 – 1.73) | 1.74 (1.39 – 2.19) | -6.0 (-8.7 – -3.3)             | -10.7 (-14.5 – -6.9)  | -65.5 (-95.6 – -35.8)                                  | -35.4 (-50.2 – -22.2) |
| Ukraine                      | 13.2 (5.7 – 20.8)                           | 6.3 (2.8 – 9.8)    | 2.01 (1.35 – 3.03) | 2.04 (1.35 – 3.09) | -13.5 (-19.5 – -7.3)           | -13.9 (-20.2 – -7.5)  | -16.4 (-24.4 – -8.9)                                   | -7.9 (-11.5 – -4.3)   |
| United Republic of Tanzania¶ | 29.9 (2.2 – 57.5)                           | 15.5 (4.3 – 27.6)  | 1.21 (1.01 – 1.44) | 1.33 (1.08 – 1.61) | -3.8 (-6.5 – -1.0)             | -6.3 (-9.5 – -2.9)    | -42.8 (-73.1 – -11.6)                                  | -22.2 (-35.9 – -9.9)  |
| Uzbekistan                   | 21.1 (3.3 – 38.7)                           | 10.3 (2.8 – 18.2)  | 1.36 (1.05 – 1.74) | 1.54 (1.13 – 2.11) | -6.9 (-10.8 – -2.7)            | -9.4 (-14.5 – -4.3)   | -31.2 (-49.9 – -12.2)                                  | -14.2 (-22.7 – -6.2)  |
| Vanuatu                      | 23.8 (11.0 – 36.7)                          | 18.6 (7.9 – 33.8)  | 2.04 (1.38 – 3.03) | 2.03 (1.37 – 3.06) | -13.3 (-18.8 – -7.3)           | -13.3 (-19.1 – -7.4)  | -29.5 (-43.3 – -16.0)                                  | -22.9 (-39.8 – -11.3) |
| Vietnam                      | 42.0 (27.7 – 56.4)                          | 18.6 (11.4 – 26.5) | 2.38 (1.76 – 3.25) | 2.44 (1.74 – 3.42) | -15.8 (-20.2 – -11.2)          | -16.5 (-21.5 – -11.1) | -50.4 (-65.3 – -35.5)                                  | -22.2 (-30.8 – -14.5) |
| Yemen                        | 83.6 (48.1 – 119.1)                         | 43.9 (25.2 – 67.9) | 2.09 (1.51 – 2.91) | 2.36 (1.70 – 3.28) | -12.3 (-16.9 – -7.5)           | -15.2 (-19.9 – -10.4) | -96.3 (-133.5 – -58.8)                                 | -52.4 (-79.1 – -31.5) |
| Zambia                       | 56.8 (32.5 – 81.8)                          | 28.3 (15.0 – 45.8) | 1.41 (1.22 – 1.64) | 1.58 (1.30 – 1.94) | -5.5 (-7.9 – -3.1)             | -9.1 (-12.5 – -5.8)   | -62.7 (-90.7 – -35.2)                                  | -36.2 (-56.6 – -20.8) |
| Zimbabwe                     | 22.6 (8.8 – 36.4)                           | 26.0 (14.5 – 40.3) | 1.38 (1.14 – 1.67) | 1.62 (1.33 – 2.01) | -6.0 (-9.2 – -2.9)             | -9.4 (-12.8 – -6.2)   | -28.4 (-43.4 – -13.5)                                  | -33.3 (-49.3 – -20.3) |

\*: Difference in 1st and 5th wealth quintile-specific U5MR.

†: Ratio of 1st to 5th wealth quintile-specific U5MR.

Table 11: **Overview of data series by country.** For each country, the total number of observation and the most recent observation year are shown after the country name. For each country-specific data series, the number of observations and the most recent observation year within that series are shown before each data series name. Countries are ordered alphabetically.

| Country     | ISO code | # obs. | Most recent ref. year | Series Name (Survey Year)                     | Data collection method  |
|-------------|----------|--------|-----------------------|-----------------------------------------------|-------------------------|
| Afghanistan | AFG      | 3      | 2012.5                |                                               |                         |
|             |          | 1      | 2007.5                | Demographic and Health Survey (2010)          | Full birth histories    |
|             |          | 1      | 2006.6                | Multiple Indicator Cluster Survey (2010–2011) | Summary birth histories |
|             |          | 1      | 2012.5                | Demographic and Health Survey (2015)          | Full birth histories    |
| Albania     | ALB      | 3      | 2005.5                |                                               |                         |
|             |          | 1      | 1995.3                | Multiple Indicator Cluster Survey (2000)      | Summary birth histories |
|             |          | 1      | 2000.9                | Multiple Indicator Cluster Survey (2005)      | Summary birth histories |
| Algeria     | DZA      | 1      | 2005.5                | Demographic and Health Survey (2008–2009)     | Full birth histories    |
|             |          | 1      | 2009.5                |                                               |                         |
|             |          | 1      | 2009.5                | Multiple Indicator Cluster Survey (2012–2013) | Full birth histories    |
| Angola      | AGO      | 3      | 2012.5                |                                               |                         |
|             |          | 1      | 1997                  | Multiple Indicator Cluster Survey (2001)      | Summary birth histories |
|             |          | 1      | 2008.5                | Demographic and Health Survey (2011)          | Full birth histories    |
| Armenia     | ARM      | 1      | 2012.5                | Demographic and Health Survey (2015–2016)     | Full birth histories    |
|             |          | 3      | 2007.5                |                                               |                         |
|             |          | 1      | 1997.5                | Demographic and Health Survey (2000)          | Full birth histories    |
| Azerbaijan  | AZE      | 1      | 2002.5                | Demographic and Health Survey (2005)          | Full birth histories    |
|             |          | 1      | 2007.5                | Demographic and Health Survey (2010)          | Full birth histories    |
|             |          | 2      | 2003.5                |                                               |                         |
| Bangladesh  | BGD      | 1      | 1995.6                | Multiple Indicator Cluster Survey (2000)      | Summary birth histories |
|             |          | 1      | 2003.5                | Demographic and Health Survey (2006)          | Full birth histories    |
|             |          | 7      | 2011.5                |                                               |                         |
| Belarus     | BLR      | 1      | 1990.5                | Demographic and Health Survey (1993–1994)     | Full birth histories    |
|             |          | 1      | 1993.5                | Demographic and Health Survey (1996–1997)     | Full birth histories    |
|             |          | 1      | 1996.5                | Demographic and Health Survey (1999–2000)     | Full birth histories    |
|             |          | 1      | 2001.5                | Demographic and Health Survey (2004)          | Full birth histories    |
|             |          | 1      | 2004.5                | Demographic and Health Survey (2007)          | Full birth histories    |
|             |          | 1      | 2008.5                | Demographic and Health Survey (2011)          | Full birth histories    |
|             |          | 1      | 2011.5                | Demographic and Health Survey (2014)          | Full birth histories    |
| Belize      | BLZ      | 1      | 2000.5                | Multiple Indicator Cluster Survey (2005)      | Summary birth histories |
|             |          | 1      | 2006.8                |                                               |                         |
|             |          | 1      | 2006.8                | Multiple Indicator Cluster Survey (2011)      | Summary birth histories |

Continued on next page

# obs.: the short form of “number of observations”

ref. year: the short form of “reference year”. Reference year of data from full birth history represents the mid-point of a five-year interval.

Table 11 – continued from previous page

| Country                          | ISO code | # obs. | Most recent ref. year | Series Name (Survey Year)                 | Data collection method  |
|----------------------------------|----------|--------|-----------------------|-------------------------------------------|-------------------------|
| Benin                            | BEN      | 4      | 2008.5                |                                           |                         |
|                                  |          | 1      | 1993.5                | Demographic and Health Survey (1996)      | Full birth histories    |
|                                  |          | 1      | 1998.5                | Demographic and Health Survey (2001)      | Full birth histories    |
|                                  |          | 1      | 2003.5                | Demographic and Health Survey (2006)      | Full birth histories    |
| Bhutan                           | BTN      | 1      | 2008.5                | Demographic and Health Survey (2011–2012) | Full birth histories    |
|                                  |          | 1      | 2005.7                |                                           |                         |
| Bhutan                           | BTN      | 1      | 2005.7                | Multiple Indicator Cluster Survey (2010)  | Summary birth histories |
|                                  |          | 1      | 2005.7                |                                           |                         |
| Bolivia (Plurinational State of) | BOL      | 5      | 2005.5                |                                           |                         |
|                                  |          | 1      | 1990.5                | Demographic and Health Survey (1994)      | Full birth histories    |
|                                  |          | 1      | 1995.5                | Demographic and Health Survey (1998)      | Full birth histories    |
|                                  |          | 1      | 1996.1                | Multiple Indicator Cluster Survey (2000)  | Summary birth histories |
|                                  |          | 1      | 2000.5                | Demographic and Health Survey (2003)      | Full birth histories    |
| Brazil                           | BRA      | 1      | 2005.5                | Demographic and Health Survey (2008)      | Full birth histories    |
|                                  |          | 1      | 1993.5                |                                           |                         |
| Brazil                           | BRA      | 1      | 1993.5                | Demographic and Health Survey (1996)      | Full birth histories    |
|                                  |          | 1      | 1993.5                |                                           |                         |
| Burkina Faso                     | BFA      | 5      | 2007.5                |                                           |                         |
|                                  |          | 1      | 1989.5                | Demographic and Health Survey (1993)      | Full birth histories    |
|                                  |          | 1      | 1995.5                | Demographic and Health Survey (1998–1999) | Full birth histories    |
|                                  |          | 1      | 2000.5                | Demographic and Health Survey (2003)      | Full birth histories    |
|                                  |          | 1      | 2002                  | Multiple Indicator Cluster Survey (2006)  | Summary birth histories |
| Burkina Faso                     | BFA      | 1      | 2007.5                | Demographic and Health Survey (2010)      | Full birth histories    |
|                                  |          | 1      | 2007.5                |                                           |                         |
| Burundi                          | BDI      | 3      | 2007.5                |                                           |                         |
|                                  |          | 1      | 1995.7                | Multiple Indicator Cluster Survey (2000)  | Summary birth histories |
|                                  |          | 1      | 2001.5                | Multiple Indicator Cluster Survey (2005)  | Summary birth histories |
| Burundi                          | BDI      | 1      | 2007.5                | Demographic and Health Survey (2010)      | Full birth histories    |
|                                  |          | 1      | 2007.5                |                                           |                         |
| Cambodia                         | KHM      | 3      | 2007.5                |                                           |                         |
|                                  |          | 1      | 1997.5                | Demographic and Health Survey (2000)      | Full birth histories    |
|                                  |          | 1      | 2002.5                | Demographic and Health Survey (2005)      | Full birth histories    |
| Cambodia                         | KHM      | 1      | 2007.5                | Demographic and Health Survey (2010)      | Full birth histories    |
|                                  |          | 1      | 2007.5                |                                           |                         |
| Cameroon                         | CMR      | 5      | 2008.5                |                                           |                         |
|                                  |          | 1      | 1988.5                | Demographic and Health Survey (1991)      | Full birth histories    |
|                                  |          | 1      | 1995.5                | Demographic and Health Survey (1998)      | Full birth histories    |
|                                  |          | 1      | 1996.2                | Multiple Indicator Cluster Survey (2000)  | Summary birth histories |
|                                  |          | 1      | 2001.5                | Demographic and Health Survey (2004)      | Full birth histories    |
| Cameroon                         | CMR      | 1      | 2008.5                | Demographic and Health Survey (2011)      | Full birth histories    |
|                                  |          | 1      | 2008.5                |                                           |                         |
| Central African Republic         | CAF      | 4      | 2006.4                |                                           |                         |

Continued on next page

# obs.: the short form of “number of observations”

ref. year: the short form of “reference year”. Reference year of data from full birth history represents the mid-point of a five-year interval.

Table 11 – continued from previous page

| Country                          | ISO code | # obs. | Most recent ref. year | Series Name (Survey Year)                 | Data collection method  |
|----------------------------------|----------|--------|-----------------------|-------------------------------------------|-------------------------|
| Chad                             | TCD      | 1      | 1991.5                | Demographic and Health Survey (1994–1995) | Full birth histories    |
|                                  |          | 1      | 1996.4                | Multiple Indicator Cluster Survey (2000)  | Summary birth histories |
|                                  |          | 1      | 2002.3                | Multiple Indicator Cluster Survey (2006)  | Summary birth histories |
|                                  |          | 1      | 2006.4                | Multiple Indicator Cluster Survey (2010)  | Summary birth histories |
|                                  |          | 5      | 2011.5                |                                           |                         |
| Colombia                         | COL      | 1      | 1993.5                | Demographic and Health Survey (1996–1997) | Full birth histories    |
|                                  |          | 1      | 1996.1                | Multiple Indicator Cluster Survey (2000)  | Summary birth histories |
|                                  |          | 1      | 2001.5                | Demographic and Health Survey (2004)      | Full birth histories    |
|                                  |          | 1      | 2005.8                | Multiple Indicator Cluster Survey (2010)  | Summary birth histories |
|                                  |          | 1      | 2011.5                | Demographic and Health Survey (2014–2015) | Full birth histories    |
| Comoros                          | COM      | 6      | 2012.5                |                                           |                         |
|                                  |          | 1      | 1987.5                | Demographic and Health Survey (1990)      | Full birth histories    |
|                                  |          | 1      | 1992.5                | Demographic and Health Survey (1995)      | Full birth histories    |
|                                  |          | 1      | 1997.5                | Demographic and Health Survey (2000)      | Full birth histories    |
|                                  |          | 1      | 2001.5                | Demographic and Health Survey (2005)      | Full birth histories    |
|                                  |          | 1      | 2006.5                | Demographic and Health Survey (2010)      | Full birth histories    |
| Congo                            | COG      | 1      | 2012.5                | Demographic and Health Survey (2015)      | Full birth histories    |
|                                  |          | 3      | 2009.5                |                                           |                         |
|                                  |          | 1      | 1993.5                | Demographic and Health Survey (1996)      | Full birth histories    |
| Democratic Republic of the Congo | COD      | 1      | 1996.2                | Multiple Indicator Cluster Survey (2000)  | Summary birth histories |
|                                  |          | 1      | 2009.5                | Demographic and Health Survey (2012)      | Full birth histories    |
| Cote d'Ivoire                    | CIV      | 2      | 2008.5                |                                           |                         |
|                                  |          | 1      | 2002.5                | Demographic and Health Survey (2005)      | Full birth histories    |
| Dominican Republic               | DOM      | 1      | 2008.5                | Demographic and Health Survey (2011–2012) | Full birth histories    |
|                                  |          | 4      | 2010.5                |                                           |                         |
|                                  |          | 1      | 1997.2                | Multiple Indicator Cluster Survey (2001)  | Summary birth histories |
|                                  |          | 1      | 2004.5                | Demographic and Health Survey (2007)      | Full birth histories    |
| Cote d'Ivoire                    | CIV      | 1      | 2006                  | Multiple Indicator Cluster Survey (2010)  | Summary birth histories |
|                                  |          | 1      | 2010.5                | Demographic and Health Survey (2013–2014) | Full birth histories    |
|                                  |          | 1      | 1991.5                | Demographic and Health Survey (1994)      | Full birth histories    |
|                                  |          | 1      | 1995.5                | Demographic and Health Survey (1998–1999) | Full birth histories    |
| Dominican Republic               | DOM      | 1      | 2002.5                | Demographic and Health Survey (2005)      | Full birth histories    |
|                                  |          | 1      | 2008.5                | Demographic and Health Survey (2011–2012) | Full birth histories    |
|                                  |          | 7      | 2011.5                |                                           |                         |
| Dominican Republic               | DOM      | 1      | 1993.5                | Demographic and Health Survey (1996)      | Full birth histories    |

Continued on next page

# obs.: the short form of “number of observations”

ref. year: the short form of “reference year”. Reference year of data from full birth history represents the mid-point of a five-year interval.

Table 11 – continued from previous page

| Country           | ISO code | # obs. | Most recent ref. year | Series Name (Survey Year)                     | Data collection method  |
|-------------------|----------|--------|-----------------------|-----------------------------------------------|-------------------------|
|                   |          | 1      | 1996.5                | Demographic and Health Survey (1999)          | Full birth histories    |
|                   |          | 1      | 1996.2                | Multiple Indicator Cluster Survey (2000)      | Summary birth histories |
|                   |          | 1      | 1999.5                | Demographic and Health Survey (2002)          | Full birth histories    |
|                   |          | 1      | 2004.5                | Demographic and Health Survey (2007)          | Full birth histories    |
|                   |          | 1      | 2010.5                | Demographic and Health Survey (2013)          | Full birth histories    |
|                   |          | 1      | 2011.5                | Multiple Indicator Cluster Survey (2014)      | Full birth histories    |
| Egypt             | EGY      | 6      | 2011.5                |                                               |                         |
|                   |          | 1      | 1992.5                | Demographic and Health Survey (1995)          | Full birth histories    |
|                   |          | 1      | 1997.5                | Demographic and Health Survey (2000)          | Full birth histories    |
|                   |          | 1      | 2000.5                | Demographic and Health Survey (2003)          | Full birth histories    |
|                   |          | 1      | 2002.5                | Demographic and Health Survey (2005)          | Full birth histories    |
|                   |          | 1      | 2005.5                | Demographic and Health Survey (2008)          | Full birth histories    |
|                   |          | 1      | 2011.5                | Demographic and Health Survey (2014)          | Full birth histories    |
| El Salvador       | SLV      | 1      | 2011.5                |                                               |                         |
|                   |          | 1      | 2011.5                | Multiple Indicator Cluster Survey (2014)      | Full birth histories    |
| Equatorial Guinea | GNQ      | 1      | 1996.2                |                                               |                         |
|                   |          | 1      | 1996.2                | Multiple Indicator Cluster Survey (2000)      | Summary birth histories |
| Eritrea           | ERI      | 1      | 1999.5                |                                               |                         |
|                   |          | 1      | 1999.5                | Demographic and Health Survey (2002)          | Full birth histories    |
| Ethiopia          | ETH      | 3      | 2007.5                |                                               |                         |
|                   |          | 1      | 1997.5                | Demographic and Health Survey (2000)          | Full birth histories    |
|                   |          | 1      | 2002.5                | Demographic and Health Survey (2005)          | Full birth histories    |
|                   |          | 1      | 2007.5                | Demographic and Health Survey (2011)          | Full birth histories    |
| Gabon             | GAB      | 2      | 2009.5                |                                               |                         |
|                   |          | 1      | 1997.5                | Demographic and Health Survey (2000)          | Full birth histories    |
|                   |          | 1      | 2009.5                | Demographic and Health Survey (2012)          | Full birth histories    |
| Gambia            | GMB      | 3      | 2010.5                |                                               |                         |
|                   |          | 1      | 1995.5                | Multiple Indicator Cluster Survey (2000)      | Summary birth histories |
|                   |          | 1      | 2001.9                | Multiple Indicator Cluster Survey (2005–2006) | Summary birth histories |
|                   |          | 1      | 2010.5                | Demographic and Health Survey (2013)          | Full birth histories    |
| Georgia           | GEO      | 1      | 2000.7                |                                               |                         |
|                   |          | 1      | 2000.7                | Multiple Indicator Cluster Survey (2005)      | Summary birth histories |
| Ghana             | GHA      | 7      | 2011.5                |                                               |                         |
|                   |          | 1      | 1990.5                | Demographic and Health Survey (1993)          | Full birth histories    |
|                   |          | 1      | 1995.5                | Demographic and Health Survey (1998)          | Full birth histories    |
|                   |          | 1      | 2000.5                | Demographic and Health Survey (2003)          | Full birth histories    |

Continued on next page

# obs.: the short form of “number of observations”

ref. year: the short form of “reference year”. Reference year of data from full birth history represents the mid-point of a five-year interval.

Table 11 – continued from previous page

| Country       | ISO code | # obs. | Most recent ref. year | Series Name (Survey Year)                     | Data collection method  |
|---------------|----------|--------|-----------------------|-----------------------------------------------|-------------------------|
| Guatemala     | GTM      | 1      | 2002                  | Multiple Indicator Cluster Survey (2006)      | Summary birth histories |
|               |          | 1      | 2005.5                | Demographic and Health Survey (2008)          | Full birth histories    |
|               |          | 1      | 2008.5                | Multiple Indicator Cluster Survey (2011)      | Full birth histories    |
|               |          | 1      | 2011.5                | Demographic and Health Survey (2014)          | Full birth histories    |
| Guinea        | GIN      | 3      | 2011.5                |                                               |                         |
|               |          | 1      | 1992.5                | Demographic and Health Survey (1995)          | Full birth histories    |
|               |          | 1      | 1995.5                | Demographic and Health Survey (1998–1999)     | Full birth histories    |
| Guinea-Bissau | GNB      | 1      | 2011.5                | Demographic and Health Survey (2014–2015)     | Full birth histories    |
|               |          | 3      | 2009.5                |                                               |                         |
|               |          | 1      | 1996.5                | Demographic and Health Survey (1999)          | Full birth histories    |
| Guyana        | GUY      | 1      | 2002.5                | Demographic and Health Survey (2005)          | Full birth histories    |
|               |          | 1      | 2009.5                | Demographic and Health Survey (2012)          | Full birth histories    |
|               |          | 3      | 2011.5                |                                               |                         |
| Haiti         | HTI      | 1      | 1995.8                | Multiple Indicator Cluster Survey (2000)      | Summary birth histories |
|               |          | 1      | 2000.9                | Multiple Indicator Cluster Survey (2006)      | Summary birth histories |
|               |          | 1      | 2011.5                | Multiple Indicator Cluster Survey (2014)      | Full birth histories    |
|               |          | 1      | 1996                  | Multiple Indicator Cluster Survey (2000–2001) | Summary birth histories |
|               |          | 1      | 2002.5                | Demographic and Health Survey (2005)          | Full birth histories    |
| Honduras      | HND      | 1      | 2001.6                | Multiple Indicator Cluster Survey (2006)      | Summary birth histories |
|               |          | 1      | 2006.5                | Demographic and Health Survey (2009)          | Full birth histories    |
|               |          | 1      | 2011.5                | Multiple Indicator Cluster Survey (2014)      | Full birth histories    |
|               |          | 4      | 2009.5                |                                               |                         |
| India         | IND      | 1      | 1991.5                | Demographic and Health Survey (1994–1995)     | Full birth histories    |
|               |          | 1      | 1997.5                | Demographic and Health Survey (2000)          | Full birth histories    |
|               |          | 1      | 2002.5                | Demographic and Health Survey (2005–2006)     | Full birth histories    |
|               |          | 1      | 2009.5                | Demographic and Health Survey (2012)          | Full birth histories    |
| Indonesia     | IDN      | 2      | 2008.5                |                                               |                         |
|               |          | 1      | 2002.5                | Demographic and Health Survey (2005–2006)     | Full birth histories    |
|               |          | 1      | 2008.5                | Demographic and Health Survey (2011–2012)     | Full birth histories    |
| Indonesia     | IDN      | 3      | 2002.5                |                                               |                         |
|               |          | 1      | 1989.5                | Demographic and Health Survey (1992–1993)     | Full birth histories    |
|               |          | 1      | 1995.5                | Demographic and Health Survey (1998–1999)     | Full birth histories    |
| Indonesia     | IDN      | 1      | 2002.5                | Demographic and Health Survey (2005–2006)     | Full birth histories    |
|               |          | 3      | 2009.5                |                                               |                         |
|               |          | 1      | 1994.5                | Demographic and Health Survey (1997)          | Full birth histories    |

Continued on next page

# obs.: the short form of “number of observations”

ref. year: the short form of “reference year”. Reference year of data from full birth history represents the mid-point of a five-year interval.



Table 11 – continued from previous page

| Country                          | ISO code | # obs. | Most recent ref. year | Series Name (Survey Year)                     | Data collection method  |
|----------------------------------|----------|--------|-----------------------|-----------------------------------------------|-------------------------|
| Iraq                             | IRQ      | 1      | 1999.5                | Demographic and Health Survey (2002–2003)     | Full birth histories    |
|                                  |          | 1      | 2009.5                | Demographic and Health Survey (2012)          | Full birth histories    |
|                                  |          | 1      | 2008.5                |                                               |                         |
| Jordan                           | JOR      | 1      | 2008.5                | Multiple Indicator Cluster Survey (2011)      | Full birth histories    |
|                                  |          | 6      | 2009.5                |                                               |                         |
| Kazakhstan                       | KAZ      | 1      | 1987.5                | Demographic and Health Survey (1990)          | Full birth histories    |
|                                  |          | 1      | 1994.5                | Demographic and Health Survey (1997)          | Full birth histories    |
|                                  |          | 1      | 1999.5                | Demographic and Health Survey (2002)          | Full birth histories    |
|                                  |          | 1      | 2004.5                | Demographic and Health Survey (2007)          | Full birth histories    |
|                                  |          | 1      | 2006.5                | Demographic and Health Survey (2009)          | Full birth histories    |
|                                  |          | 1      | 2009.5                | Demographic and Health Survey (2012)          | Full birth histories    |
| Kenya                            | KEN      | 4      | 2005.9                |                                               |                         |
|                                  |          | 1      | 1992.5                | Demographic and Health Survey (1995)          | Full birth histories    |
|                                  |          | 1      | 1996.5                | Demographic and Health Survey (1999)          | Full birth histories    |
|                                  |          | 1      | 2000.9                | Multiple Indicator Cluster Survey (2006)      | Summary birth histories |
| Kyrgyzstan                       | KGZ      | 1      | 2005.9                | Multiple Indicator Cluster Survey (2010–2011) | Summary birth histories |
|                                  |          | 6      | 2011.5                |                                               |                         |
|                                  |          | 1      | 1990.5                | Demographic and Health Survey (1993)          | Full birth histories    |
|                                  |          | 1      | 1995.5                | Demographic and Health Survey (1998)          | Full birth histories    |
|                                  |          | 1      | 1996                  | Multiple Indicator Cluster Survey (2000)      | Summary birth histories |
|                                  |          | 1      | 2000.5                | Demographic and Health Survey (2003)          | Full birth histories    |
| Lao People’s Democratic Republic | LAO      | 1      | 2005.5                | Demographic and Health Survey (2008–2009)     | Full birth histories    |
|                                  |          | 1      | 2011.5                | Demographic and Health Survey (2014)          | Full birth histories    |
|                                  |          | 4      | 2011.5                |                                               |                         |
|                                  |          | 1      | 1994.5                | Demographic and Health Survey (1997)          | Full birth histories    |
| Lesotho                          | LSO      | 1      | 2001.2                | Multiple Indicator Cluster Survey (2005–2006) | Summary birth histories |
|                                  |          | 1      | 2009.5                | Demographic and Health Survey (2012)          | Full birth histories    |
|                                  |          | 1      | 2011.5                | Multiple Indicator Cluster Survey (2014)      | Full birth histories    |
| Liberia                          | LBR      | 1      | 2008.5                |                                               |                         |
|                                  |          | 1      | 2008.5                | Multiple Indicator Cluster Survey (2011–2012) | Full birth histories    |
|                                  |          | 4      | 2011.5                |                                               |                         |
|                                  |          | 1      | 1995.6                | Multiple Indicator Cluster Survey (2000)      | Summary birth histories |
| Liberia                          | LBR      | 1      | 2001.5                | Demographic and Health Survey (2004)          | Full birth histories    |
|                                  |          | 1      | 2006.5                | Demographic and Health Survey (2009)          | Full birth histories    |
|                                  |          | 1      | 2011.5                | Demographic and Health Survey (2014)          | Full birth histories    |
|                                  |          | 3      | 2010.5                |                                               |                         |

Continued on next page

# obs.: the short form of “number of observations”

ref. year: the short form of “reference year”. Reference year of data from full birth history represents the mid-point of a five-year interval.

Table 11 – continued from previous page

| Country                                   | ISO code | # obs. | Most recent ref. year | Series Name (Survey Year)                     | Data collection method  |
|-------------------------------------------|----------|--------|-----------------------|-----------------------------------------------|-------------------------|
|                                           |          | 1      | 2003.5                | Demographic and Health Survey (2007)          | Full birth histories    |
|                                           |          | 1      | 2005.5                | Demographic and Health Survey (2009)          | Full birth histories    |
|                                           |          | 1      | 2010.5                | Demographic and Health Survey (2013)          | Full birth histories    |
| The former Yugoslav Republic of Macedonia | MKD      | 1      | 2000.5                |                                               |                         |
| Madagascar                                | MDG      | 1      | 2000.5                | Multiple Indicator Cluster Survey (2005)      | Summary birth histories |
|                                           |          | 4      | 2005.5                |                                               |                         |
|                                           |          | 1      | 1994.5                | Demographic and Health Survey (1997)          | Full birth histories    |
|                                           |          | 1      | 1996.2                | Multiple Indicator Cluster Survey (2000)      | Summary birth histories |
|                                           |          | 1      | 2000.5                | Demographic and Health Survey (2003–2004)     | Full birth histories    |
|                                           |          | 1      | 2005.5                | Demographic and Health Survey (2008–2009)     | Full birth histories    |
| Malawi                                    | MWI      | 6      | 2012.5                |                                               |                         |
|                                           |          | 1      | 1989.5                | Demographic and Health Survey (1992)          | Full birth histories    |
|                                           |          | 1      | 1997.5                | Demographic and Health Survey (2000)          | Full birth histories    |
|                                           |          | 1      | 2001.5                | Demographic and Health Survey (2004)          | Full birth histories    |
|                                           |          | 1      | 2003.5                | Multiple Indicator Cluster Survey (2006)      | Full birth histories    |
|                                           |          | 1      | 2007.5                | Demographic and Health Survey (2010)          | Full birth histories    |
|                                           |          | 1      | 2012.5                | Demographic and Health Survey (2015–2016)     | Full birth histories    |
| Maldives                                  | MDV      | 1      | 2006.5                |                                               |                         |
| Mali                                      | MLI      | 1      | 2006.5                | Demographic and Health Survey (2009)          | Full birth histories    |
|                                           |          | 4      | 2009.5                |                                               |                         |
|                                           |          | 1      | 1992.5                | Demographic and Health Survey (1995–1996)     | Full birth histories    |
|                                           |          | 1      | 1998.5                | Demographic and Health Survey (2001)          | Full birth histories    |
|                                           |          | 1      | 2003.5                | Demographic and Health Survey (2006)          | Full birth histories    |
|                                           |          | 1      | 2009.5                | Demographic and Health Survey (2012–2013)     | Full birth histories    |
| Mauritania                                | MRT      | 2      | 2008.5                |                                               |                         |
|                                           |          | 1      | 2003.1                | Multiple Indicator Cluster Survey (2007)      | Summary birth histories |
|                                           |          | 1      | 2008.5                | Multiple Indicator Cluster Survey (2011)      | Full birth histories    |
| Republic of Moldova                       | MDA      | 2      | 2009.5                |                                               |                         |
|                                           |          | 1      | 2002.5                | Demographic and Health Survey (2005)          | Full birth histories    |
|                                           |          | 1      | 2009.5                | Multiple Indicator Cluster Survey (2012)      | Full birth histories    |
| Mongolia                                  | MNG      | 4      | 2010.5                |                                               |                         |
|                                           |          | 1      | 1996                  | Multiple Indicator Cluster Survey (2000)      | Summary birth histories |
|                                           |          | 1      | 2001.2                | Multiple Indicator Cluster Survey (2005)      | Summary birth histories |
|                                           |          | 1      | 2005.8                | Multiple Indicator Cluster Survey (2010)      | Summary birth histories |
|                                           |          | 1      | 2010.5                | Multiple Indicator Cluster Survey (2013–2014) | Full birth histories    |
| Morocco                                   | MAR      | 2      | 2000.5                |                                               |                         |

Continued on next page

# obs.: the short form of “number of observations”

ref. year: the short form of “reference year”. Reference year of data from full birth history represents the mid-point of a five-year interval.

Table 11 – continued from previous page

| Country    | ISO code | # obs. | Most recent ref. year | Series Name (Survey Year)                 | Data collection method  |
|------------|----------|--------|-----------------------|-------------------------------------------|-------------------------|
| Mozambique | MOZ      | 1      | 1989.5                | Demographic and Health Survey (1992)      | Full birth histories    |
|            |          | 1      | 2000.5                | Demographic and Health Survey (2003–2004) | Full birth histories    |
|            |          | 4      | 2008.5                |                                           |                         |
|            |          | 1      | 1994.5                | Demographic and Health Survey (1997)      | Full birth histories    |
| Myanmar    | MMR      | 1      | 2000.5                | Demographic and Health Survey (2003)      | Full birth histories    |
|            |          | 1      | 2005.5                | Multiple Indicator Cluster Survey (2008)  | Full birth histories    |
|            |          | 1      | 2008.5                | Demographic and Health Survey (2011)      | Full birth histories    |
|            |          | 1      | 2012.5                |                                           |                         |
|            |          | 1      | 2012.5                | Demographic and Health Survey (2015–2016) | Full birth histories    |
| Namibia    | NAM      | 4      | 2010.5                |                                           |                         |
|            |          | 1      | 1989.5                | Demographic and Health Survey (1992)      | Full birth histories    |
|            |          | 1      | 1997.5                | Demographic and Health Survey (2000)      | Full birth histories    |
|            |          | 1      | 2003.5                | Demographic and Health Survey (2006–2007) | Full birth histories    |
| Nepal      | NPL      | 1      | 2010.5                | Demographic and Health Survey (2013)      | Full birth histories    |
|            |          | 5      | 2011.5                |                                           |                         |
|            |          | 1      | 1993.5                | Demographic and Health Survey (1996)      | Full birth histories    |
|            |          | 1      | 1998.5                | Demographic and Health Survey (2001)      | Full birth histories    |
|            |          | 1      | 2003.5                | Demographic and Health Survey (2006)      | Full birth histories    |
| Nicaragua  | NIC      | 1      | 2008.5                | Demographic and Health Survey (2011)      | Full birth histories    |
|            |          | 1      | 2011.5                | Multiple Indicator Cluster Survey (2014)  | Full birth histories    |
|            |          | 1      | 1994.5                |                                           |                         |
|            |          | 1      | 1994.5                | Demographic and Health Survey (1998)      | Full birth histories    |
|            |          | 4      | 2009.5                |                                           |                         |
| Niger      | NER      | 1      | 1995.5                | Demographic and Health Survey (1998)      | Full birth histories    |
|            |          | 1      | 1996                  | Multiple Indicator Cluster Survey (2000)  | Summary birth histories |
|            |          | 1      | 2003.5                | Demographic and Health Survey (2006)      | Full birth histories    |
|            |          | 1      | 2009.5                | Demographic and Health Survey (2012)      | Full birth histories    |
| Nigeria    | NGA      | 7      | 2010.5                |                                           |                         |
|            |          | 1      | 1987.5                | Demographic and Health Survey (1990)      | Full birth histories    |
|            |          | 1      | 2000.5                | Demographic and Health Survey (2003)      | Full birth histories    |
|            |          | 1      | 2002.5                | Multiple Indicator Cluster Survey (2007)  | Summary birth histories |
|            |          | 1      | 2005.5                | Demographic and Health Survey (2008)      | Full birth histories    |
|            |          | 1      | 2007.5                | Demographic and Health Survey (2010)      | Full birth histories    |
|            |          | 1      | 2006.6                | Multiple Indicator Cluster Survey (2011)  | Summary birth histories |
| Pakistan   | PAK      | 1      | 2010.5                | Demographic and Health Survey (2013)      | Full birth histories    |
|            |          | 3      | 2009.5                |                                           |                         |
|            |          |        |                       |                                           |                         |

Continued on next page

# obs.: the short form of “number of observations”

ref. year: the short form of “reference year”. Reference year of data from full birth history represents the mid-point of a five-year interval.

Table 11 – continued from previous page

| Country               | ISO code | # obs. | Most recent ref. year | Series Name (Survey Year)                 | Data collection method  |
|-----------------------|----------|--------|-----------------------|-------------------------------------------|-------------------------|
|                       |          | 1      | 1987.5                | Demographic and Health Survey (1990–1991) | Full birth histories    |
|                       |          | 1      | 2003.5                | Demographic and Health Survey (2006–2007) | Full birth histories    |
|                       |          | 1      | 2009.5                | Demographic and Health Survey (2012–2013) | Full birth histories    |
| Paraguay              | PRY      | 1      | 1987.5                |                                           |                         |
|                       |          | 1      | 1987.5                | Demographic and Health Survey (1990)      | Full birth histories    |
| Peru                  | PER      | 9      | 2011.5                |                                           |                         |
|                       |          | 1      | 1988.5                | Demographic and Health Survey (1991–1992) | Full birth histories    |
|                       |          | 1      | 1993.5                | Demographic and Health Survey (1996)      | Full birth histories    |
|                       |          | 1      | 1997.5                | Demographic and Health Survey (2000)      | Full birth histories    |
|                       |          | 1      | 2000.5                | Demographic and Health Survey (2004–2008) | Full birth histories    |
|                       |          | 1      | 2006.5                | Demographic and Health Survey (2009)      | Full birth histories    |
|                       |          | 1      | 2007.5                | Demographic and Health Survey (2010)      | Full birth histories    |
|                       |          | 1      | 2008.5                | Demographic and Health Survey (2011)      | Full birth histories    |
|                       |          | 1      | 2009.5                | Demographic and Health Survey (2012)      | Full birth histories    |
|                       |          | 1      | 2011.5                | Demographic and Health Survey (2014)      | Full birth histories    |
| Philippines           | PHL      | 5      | 2010.5                |                                           |                         |
|                       |          | 1      | 1990.5                | Demographic and Health Survey (1993)      | Full birth histories    |
|                       |          | 1      | 1995.5                | Demographic and Health Survey (1998)      | Full birth histories    |
|                       |          | 1      | 2000.5                | Demographic and Health Survey (2003)      | Full birth histories    |
|                       |          | 1      | 2005.5                | Demographic and Health Survey (2008)      | Full birth histories    |
|                       |          | 1      | 2010.5                | Demographic and Health Survey (2013)      | Full birth histories    |
| Rwanda                | RWA      | 5      | 2011.5                |                                           |                         |
|                       |          | 1      | 1989.5                | Demographic and Health Survey (1992)      | Full birth histories    |
|                       |          | 1      | 2002.5                | Demographic and Health Survey (2005)      | Full birth histories    |
|                       |          | 1      | 2004.5                | Demographic and Health Survey (2007–2008) | Full birth histories    |
|                       |          | 1      | 2007.5                | Demographic and Health Survey (2010)      | Full birth histories    |
|                       |          | 1      | 2011.5                | Demographic and Health Survey (2014–2015) | Full birth histories    |
| Sao Tome and Principe | STP      | 3      | 2011.5                |                                           |                         |
|                       |          | 1      | 1996.1                | Multiple Indicator Cluster Survey (2000)  | Summary birth histories |
|                       |          | 1      | 2005.5                | Demographic and Health Survey (2008–2009) | Full birth histories    |
|                       |          | 1      | 2011.5                | Multiple Indicator Cluster Survey (2014)  | Full birth histories    |
| Senegal               | SEN      | 7      | 2012.5                |                                           |                         |
|                       |          | 1      | 1994.5                | Demographic and Health Survey (1997)      | Full birth histories    |
|                       |          | 1      | 2002.5                | Demographic and Health Survey (2005)      | Full birth histories    |
|                       |          | 1      | 2005.5                | Demographic and Health Survey (2008–2009) | Full birth histories    |
|                       |          | 1      | 2007.5                | Demographic and Health Survey (2010–2011) | Full birth histories    |

Continued on next page

# obs.: the short form of “number of observations”

ref. year: the short form of “reference year”. Reference year of data from full birth history represents the mid-point of a five-year interval.

Table 11 – continued from previous page

| Country              | ISO code | # obs. | Most recent ref. year | Series Name (Survey Year)                     | Data collection method  |
|----------------------|----------|--------|-----------------------|-----------------------------------------------|-------------------------|
| Serbia               | SRB      | 1      | 2009.5                | Demographic and Health Survey (2012–2013)     | Full birth histories    |
|                      |          | 1      | 2011.5                | Demographic and Health Survey (2014)          | Full birth histories    |
|                      |          | 1      | 2012.5                | Demographic and Health Survey (2015)          | Full birth histories    |
|                      |          | 1      | 2005.7                |                                               |                         |
|                      |          | 1      | 2005.7                | Multiple Indicator Cluster Survey (2010)      | Summary birth histories |
| Sierra Leone         | SLE      | 5      | 2010.5                |                                               |                         |
|                      |          | 1      | 1995.8                | Multiple Indicator Cluster Survey (2000)      | Summary birth histories |
|                      |          | 1      | 2000.9                | Multiple Indicator Cluster Survey (2005–2006) | Summary birth histories |
|                      |          | 1      | 2005.5                | Demographic and Health Survey (2008)          | Full birth histories    |
|                      |          | 1      | 2006.3                | Multiple Indicator Cluster Survey (2010)      | Summary birth histories |
|                      |          | 1      | 2010.5                | Demographic and Health Survey (2013)          | Full birth histories    |
| Somalia              | SOM      | 1      | 2003.5                |                                               |                         |
|                      |          | 1      | 2003.5                | Multiple Indicator Cluster Survey (2006)      | Full birth histories    |
| South Africa         | ZAF      | 1      | 1995.5                |                                               |                         |
|                      |          | 1      | 1995.5                | Demographic and Health Survey (1998)          | Full birth histories    |
| South Sudan          | SSD      | 1      | 2007.5                |                                               |                         |
|                      |          | 1      | 2007.5                | Multiple Indicator Cluster Survey (2010)      | Full birth histories    |
| State of Palestine   | PSE      | 2      | 2011.5                |                                               |                         |
|                      |          | 1      | 2007.5                | Multiple Indicator Cluster Survey (2010)      | Full birth histories    |
|                      |          | 1      | 2011.5                | Multiple Indicator Cluster Survey (2014)      | Full birth histories    |
| Sudan                | SDN      | 2      | 2011.5                |                                               |                         |
|                      |          | 1      | 2007.5                | Multiple Indicator Cluster Survey (2010)      | Full birth histories    |
|                      |          | 1      | 2011.5                | Multiple Indicator Cluster Survey (2014)      | Full birth histories    |
| Suriname             | SUR      | 2      | 2001.5                |                                               |                         |
|                      |          | 1      | 1995.2                | Multiple Indicator Cluster Survey (1999–2000) | Summary birth histories |
|                      |          | 1      | 2001.5                | Multiple Indicator Cluster Survey (2006)      | Summary birth histories |
| Swaziland            | SWZ      | 4      | 2011.5                |                                               |                         |
|                      |          | 1      | 1995.9                | Multiple Indicator Cluster Survey (1999–2000) | Summary birth histories |
|                      |          | 1      | 2003.5                | Demographic and Health Survey (2006–2007)     | Full birth histories    |
|                      |          | 1      | 2007.5                | Multiple Indicator Cluster Survey (2010)      | Full birth histories    |
|                      |          | 1      | 2011.5                | Multiple Indicator Cluster Survey (2014)      | Full birth histories    |
| Syrian Arab Republic | SYR      | 1      | 2001.8                |                                               |                         |
|                      |          | 1      | 2001.8                | Multiple Indicator Cluster Survey (2006)      | Summary birth histories |
| Tajikistan           | TJK      | 3      | 2009.5                |                                               |                         |
|                      |          | 1      | 1996.1                | Multiple Indicator Cluster Survey (2000)      | Summary birth histories |
|                      |          | 1      | 2001                  | Multiple Indicator Cluster Survey (2005)      | Summary birth histories |

Continued on next page

# obs.: the short form of “number of observations”

ref. year: the short form of “reference year”. Reference year of data from full birth history represents the mid-point of a five-year interval.

Table 11 – continued from previous page

| Country                     | ISO code | # obs. | Most recent ref. year | Series Name (Survey Year)                     | Data collection method  |
|-----------------------------|----------|--------|-----------------------|-----------------------------------------------|-------------------------|
| United Republic of Tanzania | TZA      | 1      | 2009.5                | Demographic and Health Survey (2012)          | Full birth histories    |
|                             |          | 6      | 2012.5                |                                               |                         |
|                             |          | 1      | 1993.5                | Demographic and Health Survey (1996)          | Full birth histories    |
|                             |          | 1      | 1996.5                | Demographic and Health Survey (1999)          | Full birth histories    |
|                             |          | 1      | 2001.5                | Demographic and Health Survey (2004–2005)     | Full birth histories    |
|                             |          | 1      | 2004.5                | Demographic and Health Survey (2007–2008)     | Full birth histories    |
|                             |          | 1      | 2006.5                | Demographic and Health Survey (2010)          | Full birth histories    |
| Thailand                    | THA      | 1      | 2012.5                | Demographic and Health Survey (2015–2016)     | Full birth histories    |
|                             |          | 1      | 2000.9                |                                               |                         |
| Timor-Leste                 | TLS      | 1      | 2000.9                | Multiple Indicator Cluster Survey (2005–2006) | Summary birth histories |
|                             |          | 1      | 2006.5                |                                               |                         |
| Togo                        | TGO      | 1      | 2006.5                | Demographic and Health Survey (2009–2010)     | Full birth histories    |
|                             |          | 4      | 2010.5                |                                               |                         |
| Tunisia                     | TUN      | 1      | 1995.5                | Demographic and Health Survey (1998)          | Full birth histories    |
|                             |          | 1      | 2001.8                | Multiple Indicator Cluster Survey (2006)      | Summary birth histories |
|                             |          | 1      | 2006.1                | Multiple Indicator Cluster Survey (2010)      | Summary birth histories |
|                             |          | 1      | 2010.5                | Demographic and Health Survey (2013–2014)     | Full birth histories    |
| Turkey                      | TUR      | 1      | 2008.5                |                                               |                         |
|                             |          | 1      | 2008.5                | Multiple Indicator Cluster Survey (2011–2012) | Full birth histories    |
| Turkmenistan                | TKM      | 3      | 2000.5                |                                               |                         |
|                             |          | 1      | 1990.5                | Demographic and Health Survey (1993)          | Full birth histories    |
|                             |          | 1      | 1995.5                | Demographic and Health Survey (1998)          | Full birth histories    |
| Uganda                      | UGA      | 1      | 2000.5                | Demographic and Health Survey (2003)          | Full birth histories    |
|                             |          | 1      | 2012.5                | Multiple Indicator Cluster Survey (2015–2016) | Full birth histories    |
| Ukraine                     | UKR      | 5      | 2012.5                |                                               |                         |
|                             |          | 1      | 2008.5                | Demographic and Health Survey (2011)          | Full birth histories    |
|                             |          | 1      | 1992.5                | Demographic and Health Survey (1995)          | Full birth histories    |
|                             |          | 1      | 1997.5                | Demographic and Health Survey (2000–2001)     | Full birth histories    |
|                             |          | 1      | 2003.5                | Demographic and Health Survey (2006)          | Full birth histories    |
| Uzbekistan                  | UZB      | 1      | 2006.5                | Demographic and Health Survey (2009)          | Full birth histories    |
|                             |          | 1      | 2008.5                | Demographic and Health Survey (2011)          | Full birth histories    |
| Uzbekistan                  | UZB      | 2      | 2004.5                |                                               |                         |
|                             |          | 1      | 1999.9                | Multiple Indicator Cluster Survey (2005)      | Summary birth histories |
|                             |          | 1      | 2004.5                | Demographic and Health Survey (2007)          | Full birth histories    |
| Uzbekistan                  | UZB      | 3      | 2001.4                |                                               |                         |
|                             |          | 1      | 1993.5                | Demographic and Health Survey (1996)          | Full birth histories    |

Continued on next page

# obs.: the short form of “number of observations”

ref. year: the short form of “reference year”. Reference year of data from full birth history represents the mid-point of a five-year interval.

Table 11 – continued from previous page

| Country  | ISO code | # obs.                                    | Most recent ref. year | Series Name (Survey Year)                     | Data collection method  |
|----------|----------|-------------------------------------------|-----------------------|-----------------------------------------------|-------------------------|
| Vanuatu  | VUT      | 1                                         | 1995.9                | Multiple Indicator Cluster Survey (2000)      | Summary birth histories |
|          |          | 1                                         | 2001.4                | Multiple Indicator Cluster Survey (2006)      | Summary birth histories |
|          |          | 1                                         | 2003.4                |                                               |                         |
| Viet Nam | VNM      | 1                                         | 2003.4                | Multiple Indicator Cluster Survey (2007–2008) | Summary birth histories |
|          |          | 5                                         | 2005.7                |                                               |                         |
| Yemen    | YEM      | 1                                         | 1994.5                | Demographic and Health Survey (1997)          | Full birth histories    |
|          |          | 1                                         | 1995.3                | Multiple Indicator Cluster Survey (2000)      | Summary birth histories |
|          |          | 1                                         | 1999.5                | Demographic and Health Survey (2002)          | Full birth histories    |
|          |          | 1                                         | 2001.6                | Multiple Indicator Cluster Survey (2006)      | Summary birth histories |
|          |          | 1                                         | 2005.7                | Multiple Indicator Cluster Survey (2010–2011) | Summary birth histories |
| Zambia   | ZMB      | 1                                         | 2003.5                |                                               |                         |
|          |          | 1                                         | 2003.5                | Multiple Indicator Cluster Survey (2006)      | Full birth histories    |
|          |          | 4                                         | 2010.5                |                                               |                         |
|          |          | 1                                         | 1993.5                | Demographic and Health Survey (1996)          | Full birth histories    |
| Zimbabwe | ZWE      | 1                                         | 1998.5                | Demographic and Health Survey (2001–2002)     | Full birth histories    |
|          |          | 1                                         | 2004.5                | Demographic and Health Survey (2007)          | Full birth histories    |
|          |          | 1                                         | 2010.5                | Demographic and Health Survey (2013–2014)     | Full birth histories    |
|          |          | 7                                         | 2012.5                |                                               |                         |
|          |          | 1                                         | 1991.5                | Demographic and Health Survey (1994)          | Full birth histories    |
|          |          | 1                                         | 1996.5                | Demographic and Health Survey (1999)          | Full birth histories    |
|          |          | 1                                         | 2002.5                | Demographic and Health Survey (2005–2006)     | Full birth histories    |
| 1        | 2006.5   | Multiple Indicator Cluster Survey (2009)  | Full birth histories  |                                               |                         |
| 1        | 2007.5   | Demographic and Health Survey (2010–2011) | Full birth histories  |                                               |                         |
| 1        | 2011.5   | Multiple Indicator Cluster Survey (2014)  | Full birth histories  |                                               |                         |
| 1        | 2012.5   | Demographic and Health Survey (2015)      | Full birth histories  |                                               |                         |

## 6 Supplementary Figures

- Figure 4: 3rd quintile-disparity ratios against national-level U5MR – model results;
- Figure 5: Country ranks for inequality indexes in 2016;
- Figure 6: Slope inequality index and concentration index in 2016, for the 99 countries with empirical data;
- Figure 7: Comparison between aggregated results based on the 137 LMICs, and the aggregated results based on the 99 countries with empirical data;
- Figure 8: Aggregated U5MR and percentage of under-5 deaths by wealth quintile, for the 137 LMICs combined and for regions;
- Figure 9: U5MR by wealth quintile, for the 99 countries with empirical data;
- Figure 10: Ratio of U5MR in wealth quintile 1 (poorest) to wealth quintile 5 (richest), for the 99 countries with empirical data;
- Figure 11: All wealth quintile-specific results, for the 99 countries with empirical data;



Figure 4 shows the model results of the average relative difference  $U_{w,c,t}$  given the national-level U5MR for that country-year. From left to right, the four plots show the model results of  $U_{w,c,t}$  for  $w = 1, 2, 4, 5$  respectively. Comparing to the LOESS curves in green, within the 95% bounds of national-level U5MR, the model estimates and LOESS curves produce mostly agree with each other.

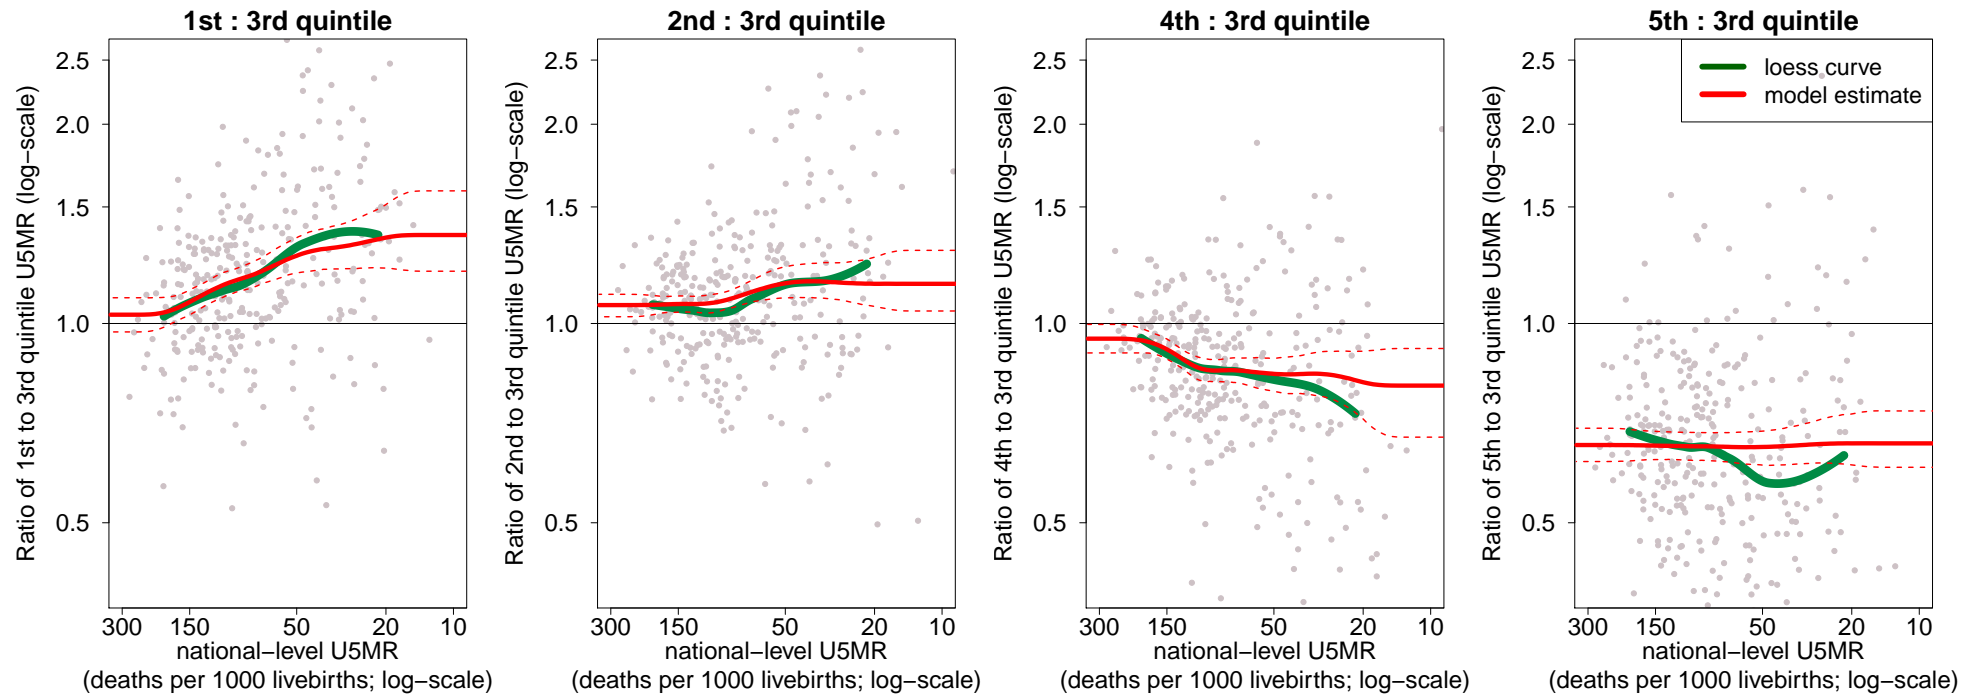

Figure 4: **3rd quintile-disparity ratios against national-level U5MR – model results.** The grey dots are observed 3rd quintile-disparity ratios  $S_{w,c,t}$  (i.e.  $= Q_{w,c,t}/Q_{3,c,t}$ ) for  $w = 1, 2, 4, 5$  respectively for the four plots. The red solid curves are point estimates for the expected 3rd quintile-disparity ratios  $U_{w,c,t}$  (i.e.  $= S_{w,c,t}/P_{w,c,t}$ ) and dashed lines are the corresponding 5th and 95th percentiles of the uncertainty bounds. The green curves are LOESS curves between the 5th and 95th percentiles of the national-level U5MR.

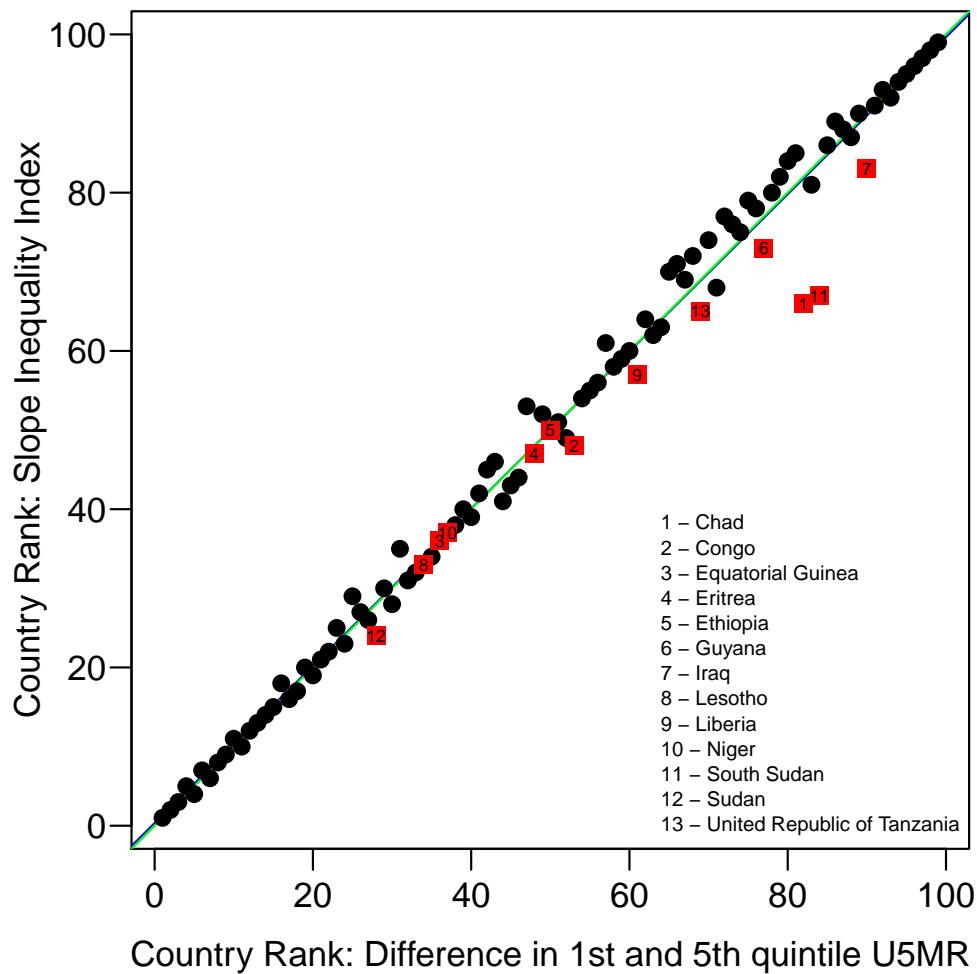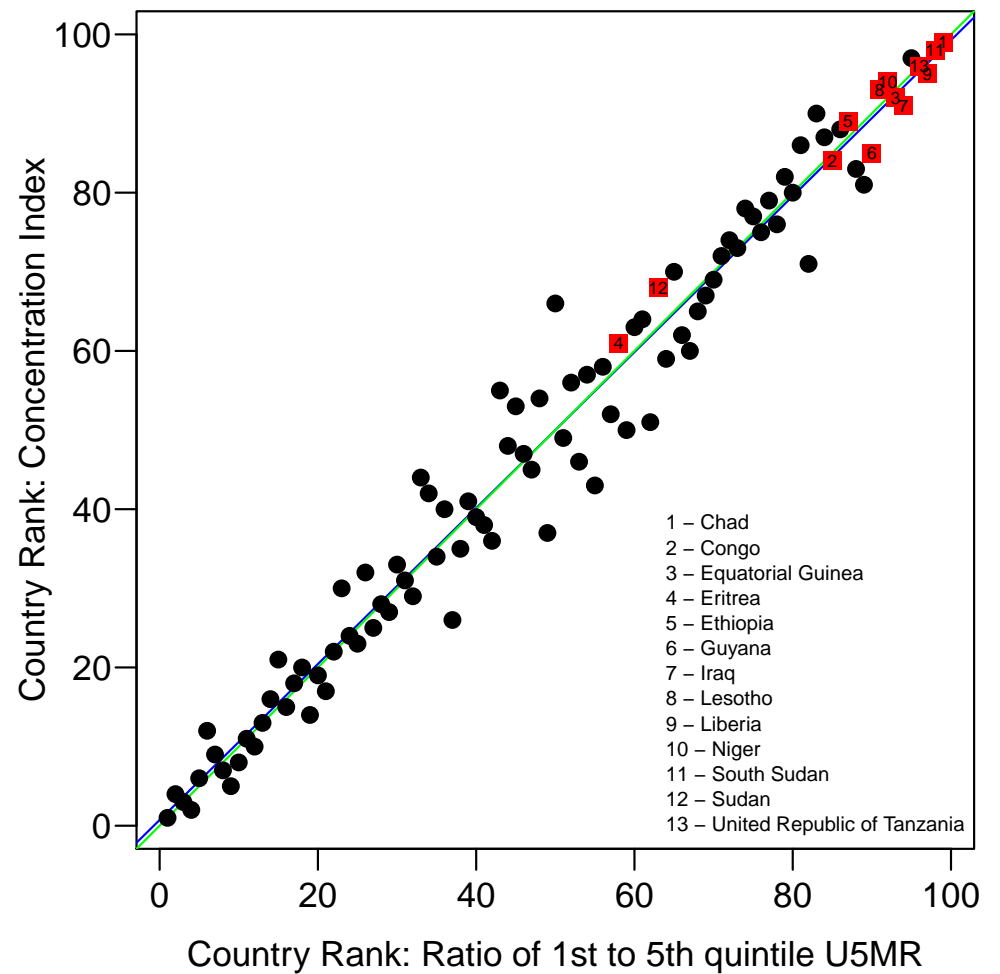

Figure 5: **Country ranks for inequality indexes in 2016, for the 99 countries with empirical data.** The dots are the country disparity ranks based on point estimates of the four inequality indexes in 2016. The smaller the ranks, the greater the disparity is. The green line is the diagonal, indicating equality of two ranks. The blue line is the fitted regression line. The red squared dots refer to countries in which the U5MR in the 1st wealth quintile is not the largest and/or the U5MR in the 5th wealth quintile is not the smallest, among all the wealth quintiles for a country in 2016.

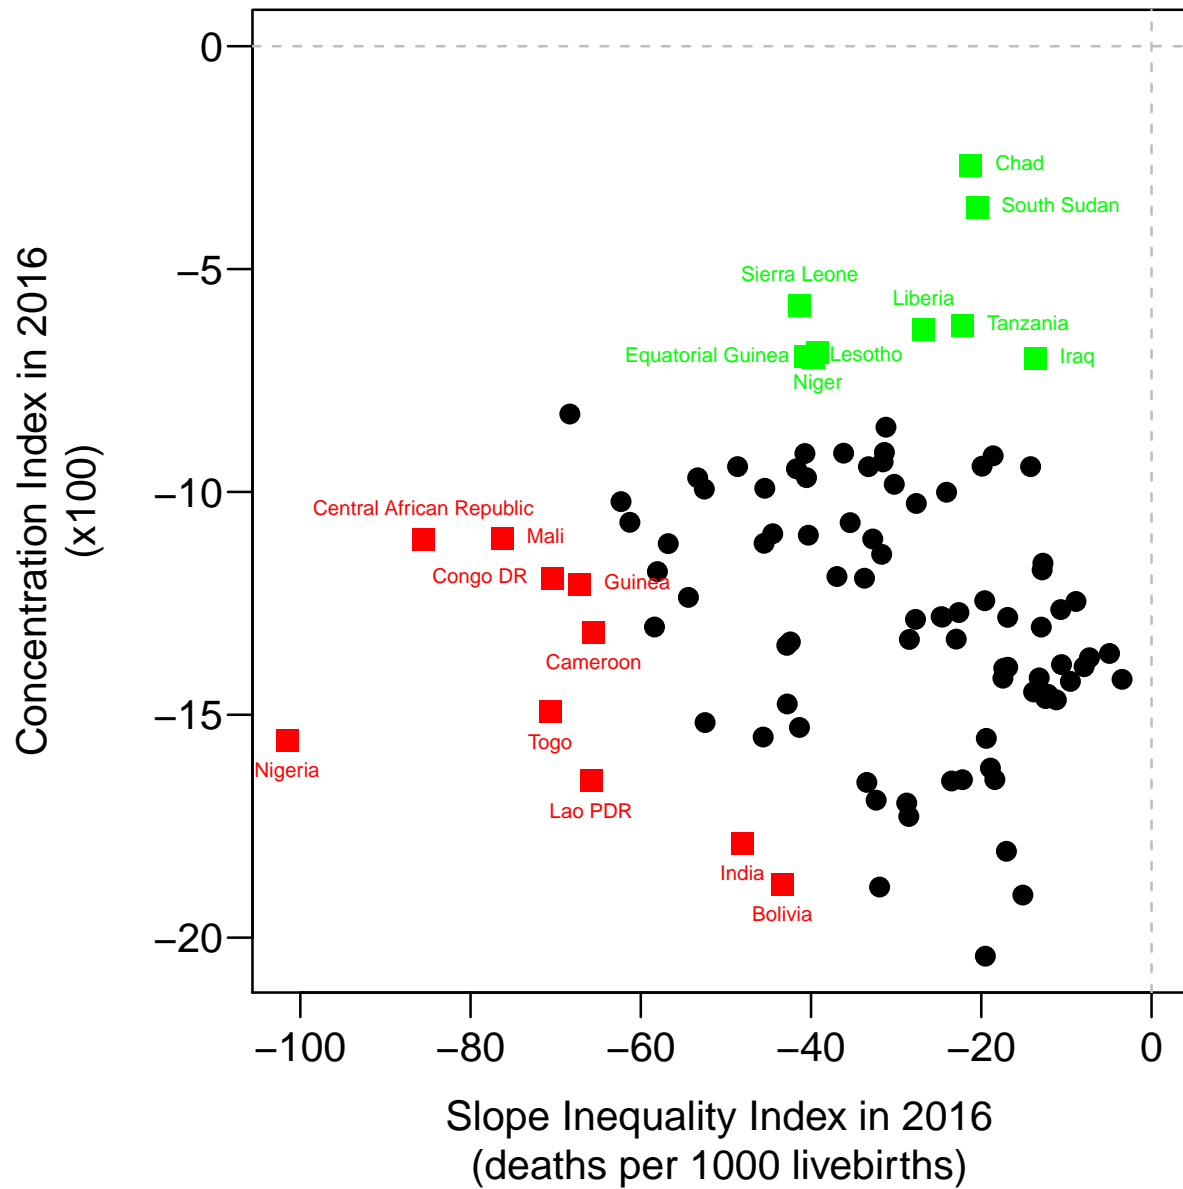

Figure 6: **Slope inequality index and concentration index in 2016, for the 99 countries with empirical data.** The dots are point estimates of indexes in 2016 for the 99 countries with empirical data. The green dots highlight countries with the smallest absolute disparity (based on slope inequality index) and the smallest relative disparity (based on concentration index). The red dots highlighted countries with the largest absolute and relative disparity.

Figure 7: **Comparison between aggregated results based on the 137 low-income and middle-income countries, and the aggregated results based on the 99 countries with empirical data.** Solid curves are point estimates from the model. Shaded areas around the solid curves are the 90% uncertainty intervals. Top: estimated ratio of wealth quintile-specific U5MR to national-level U5MR. Bottom: U5MR by wealth quintile.

# All countries combined

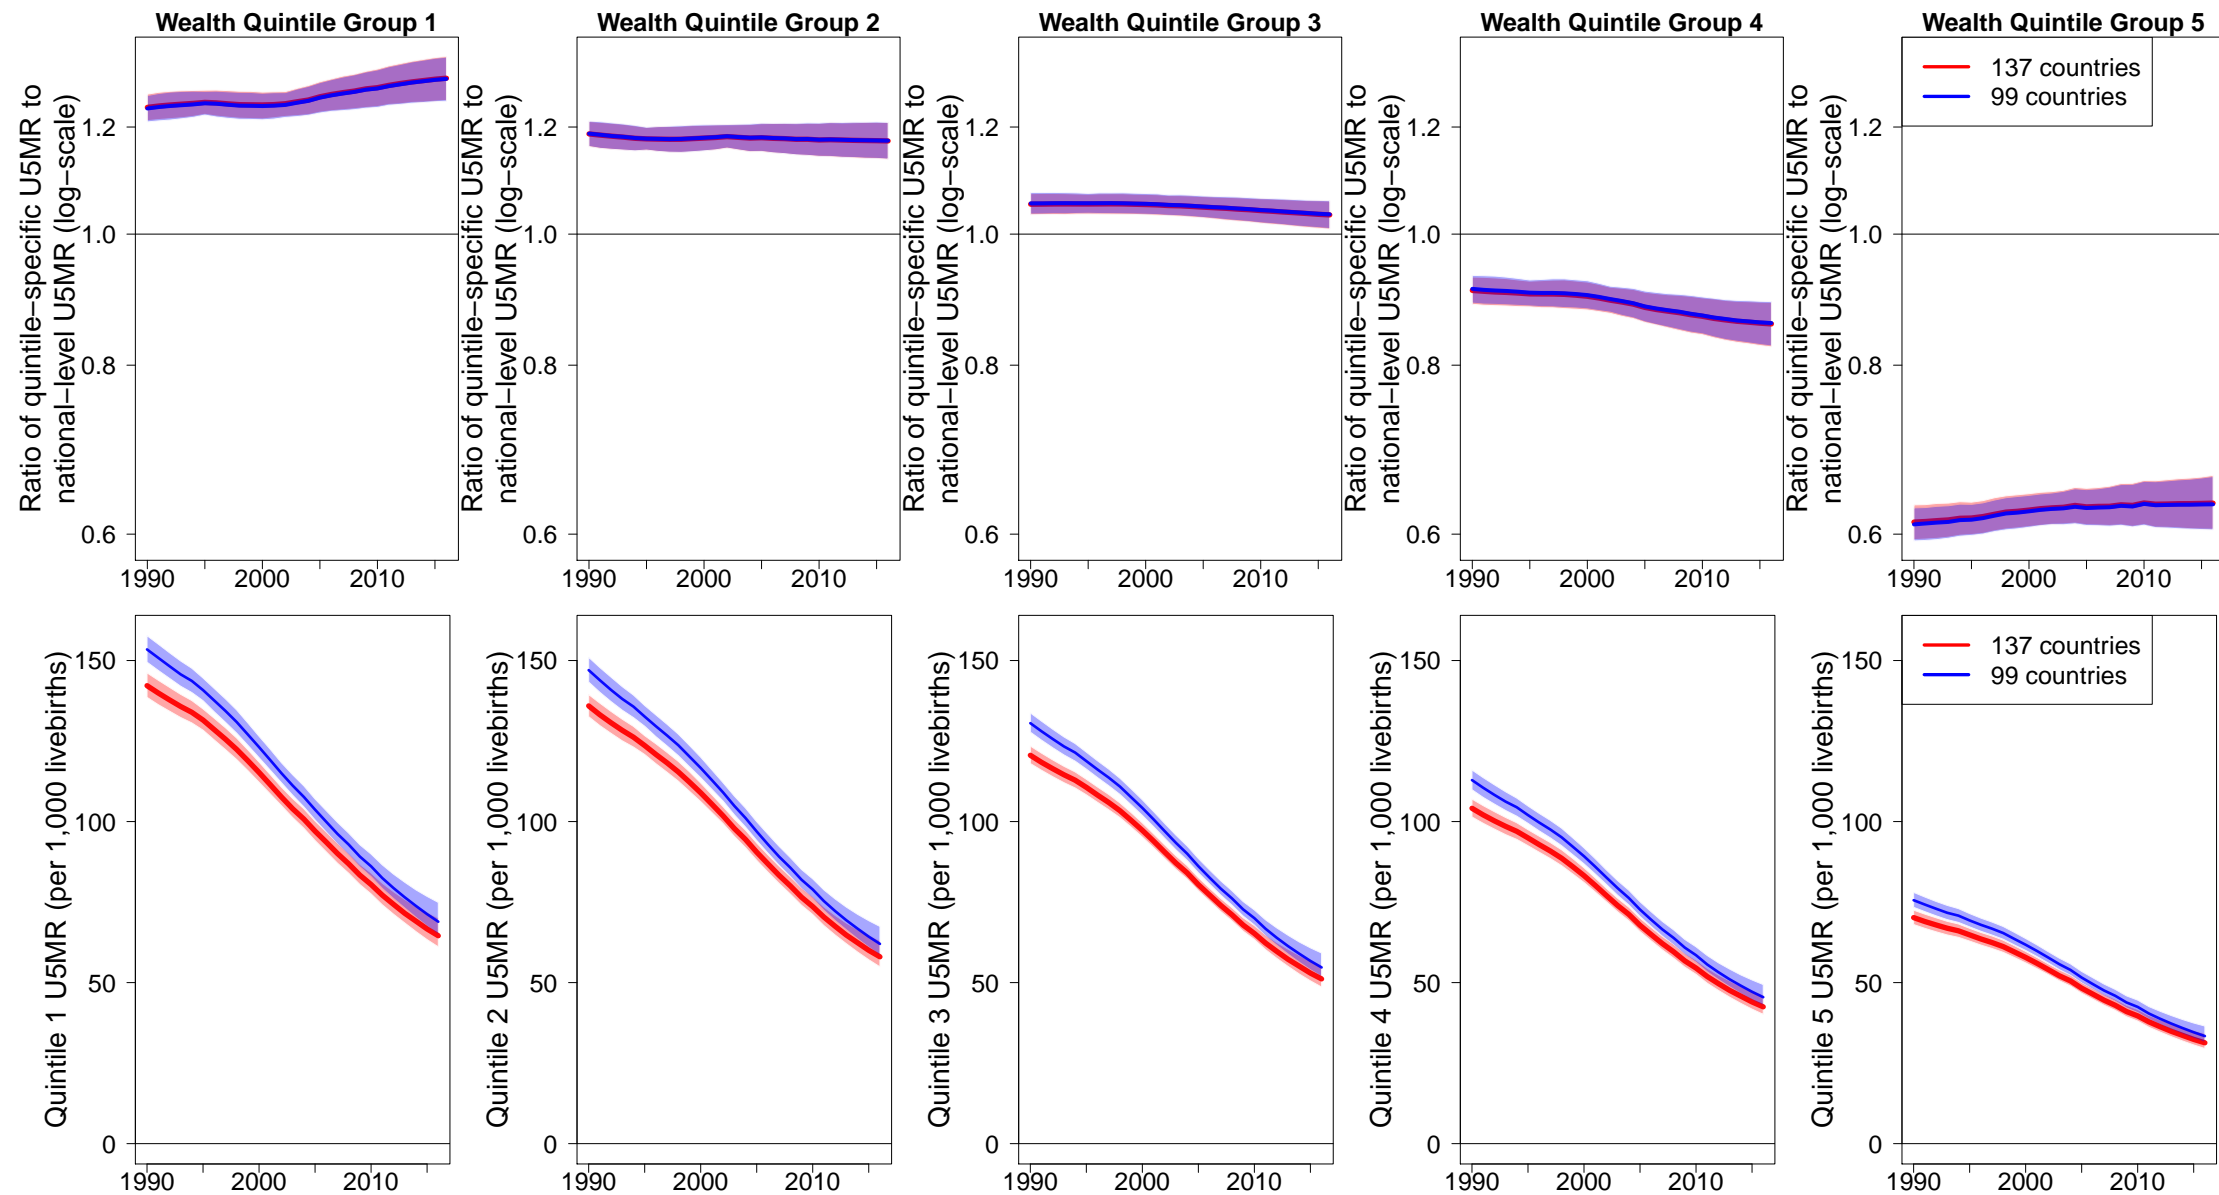

# South Asia

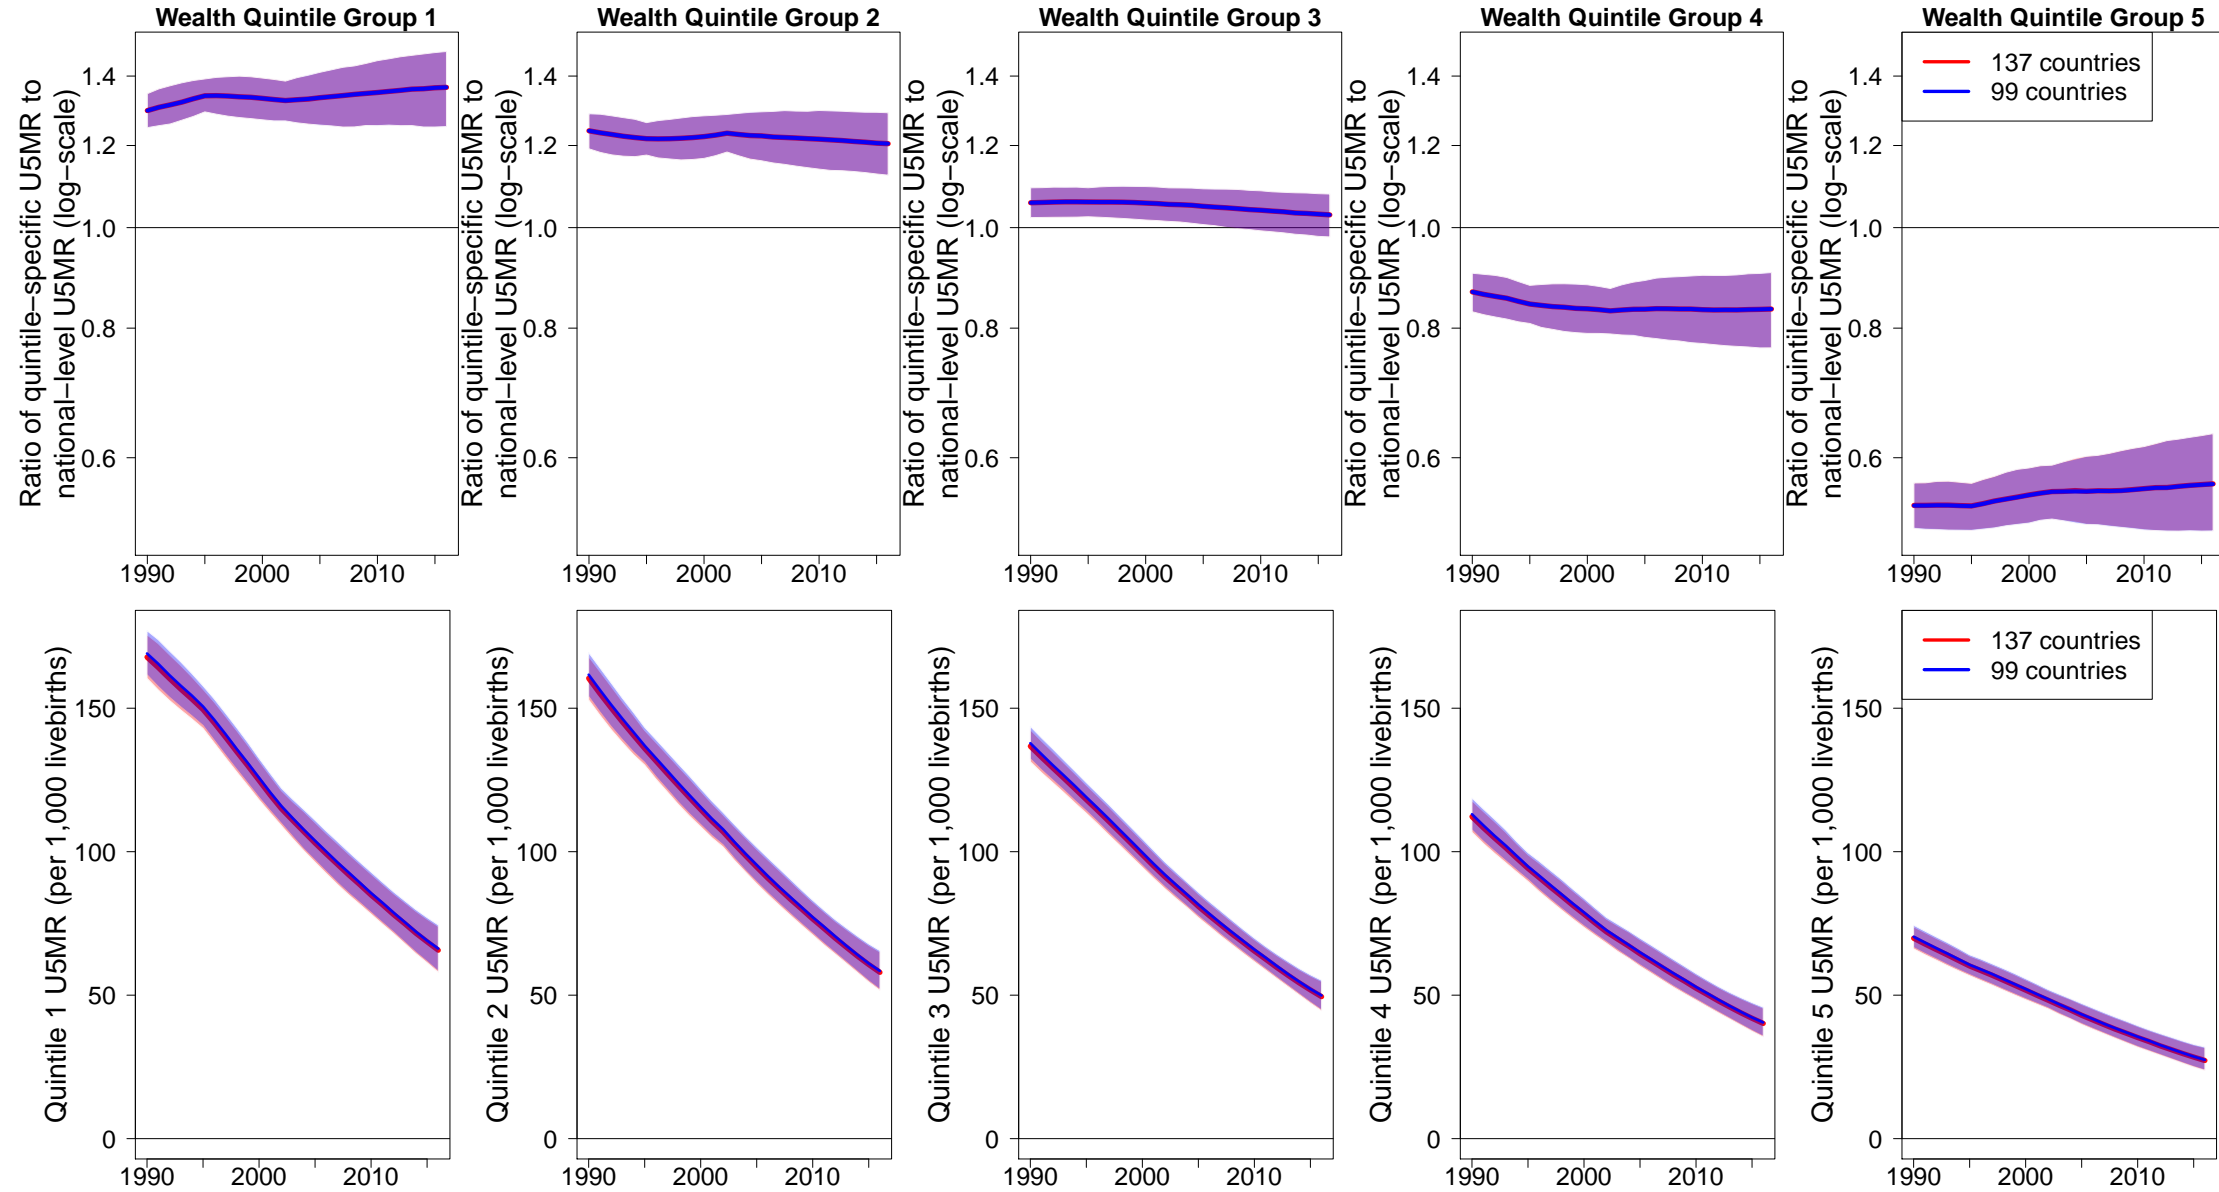

# Eastern Europe and Central Asia

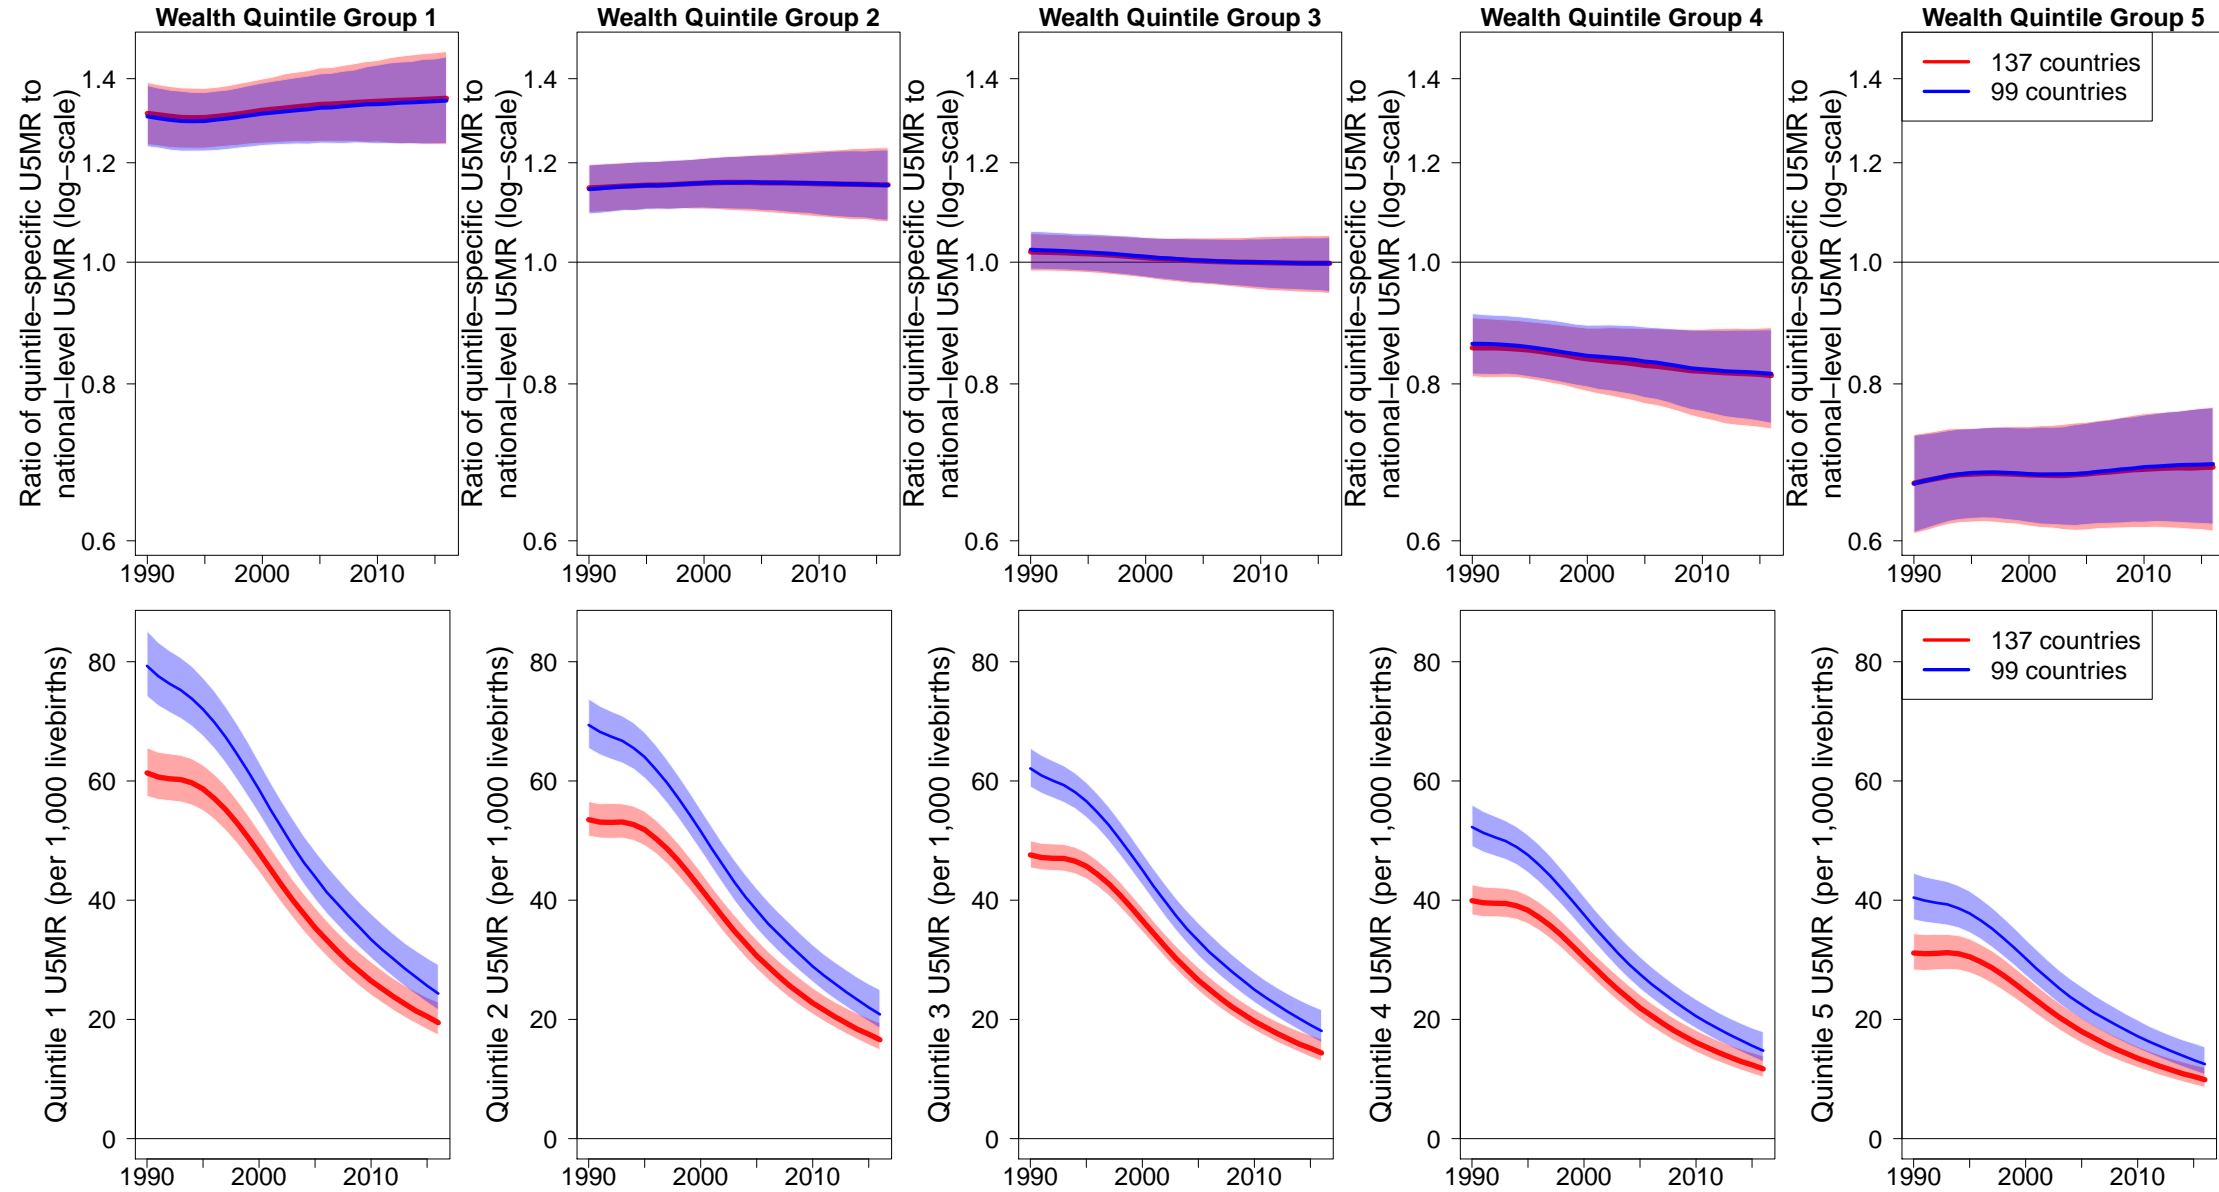

# Eastern and Southern Africa

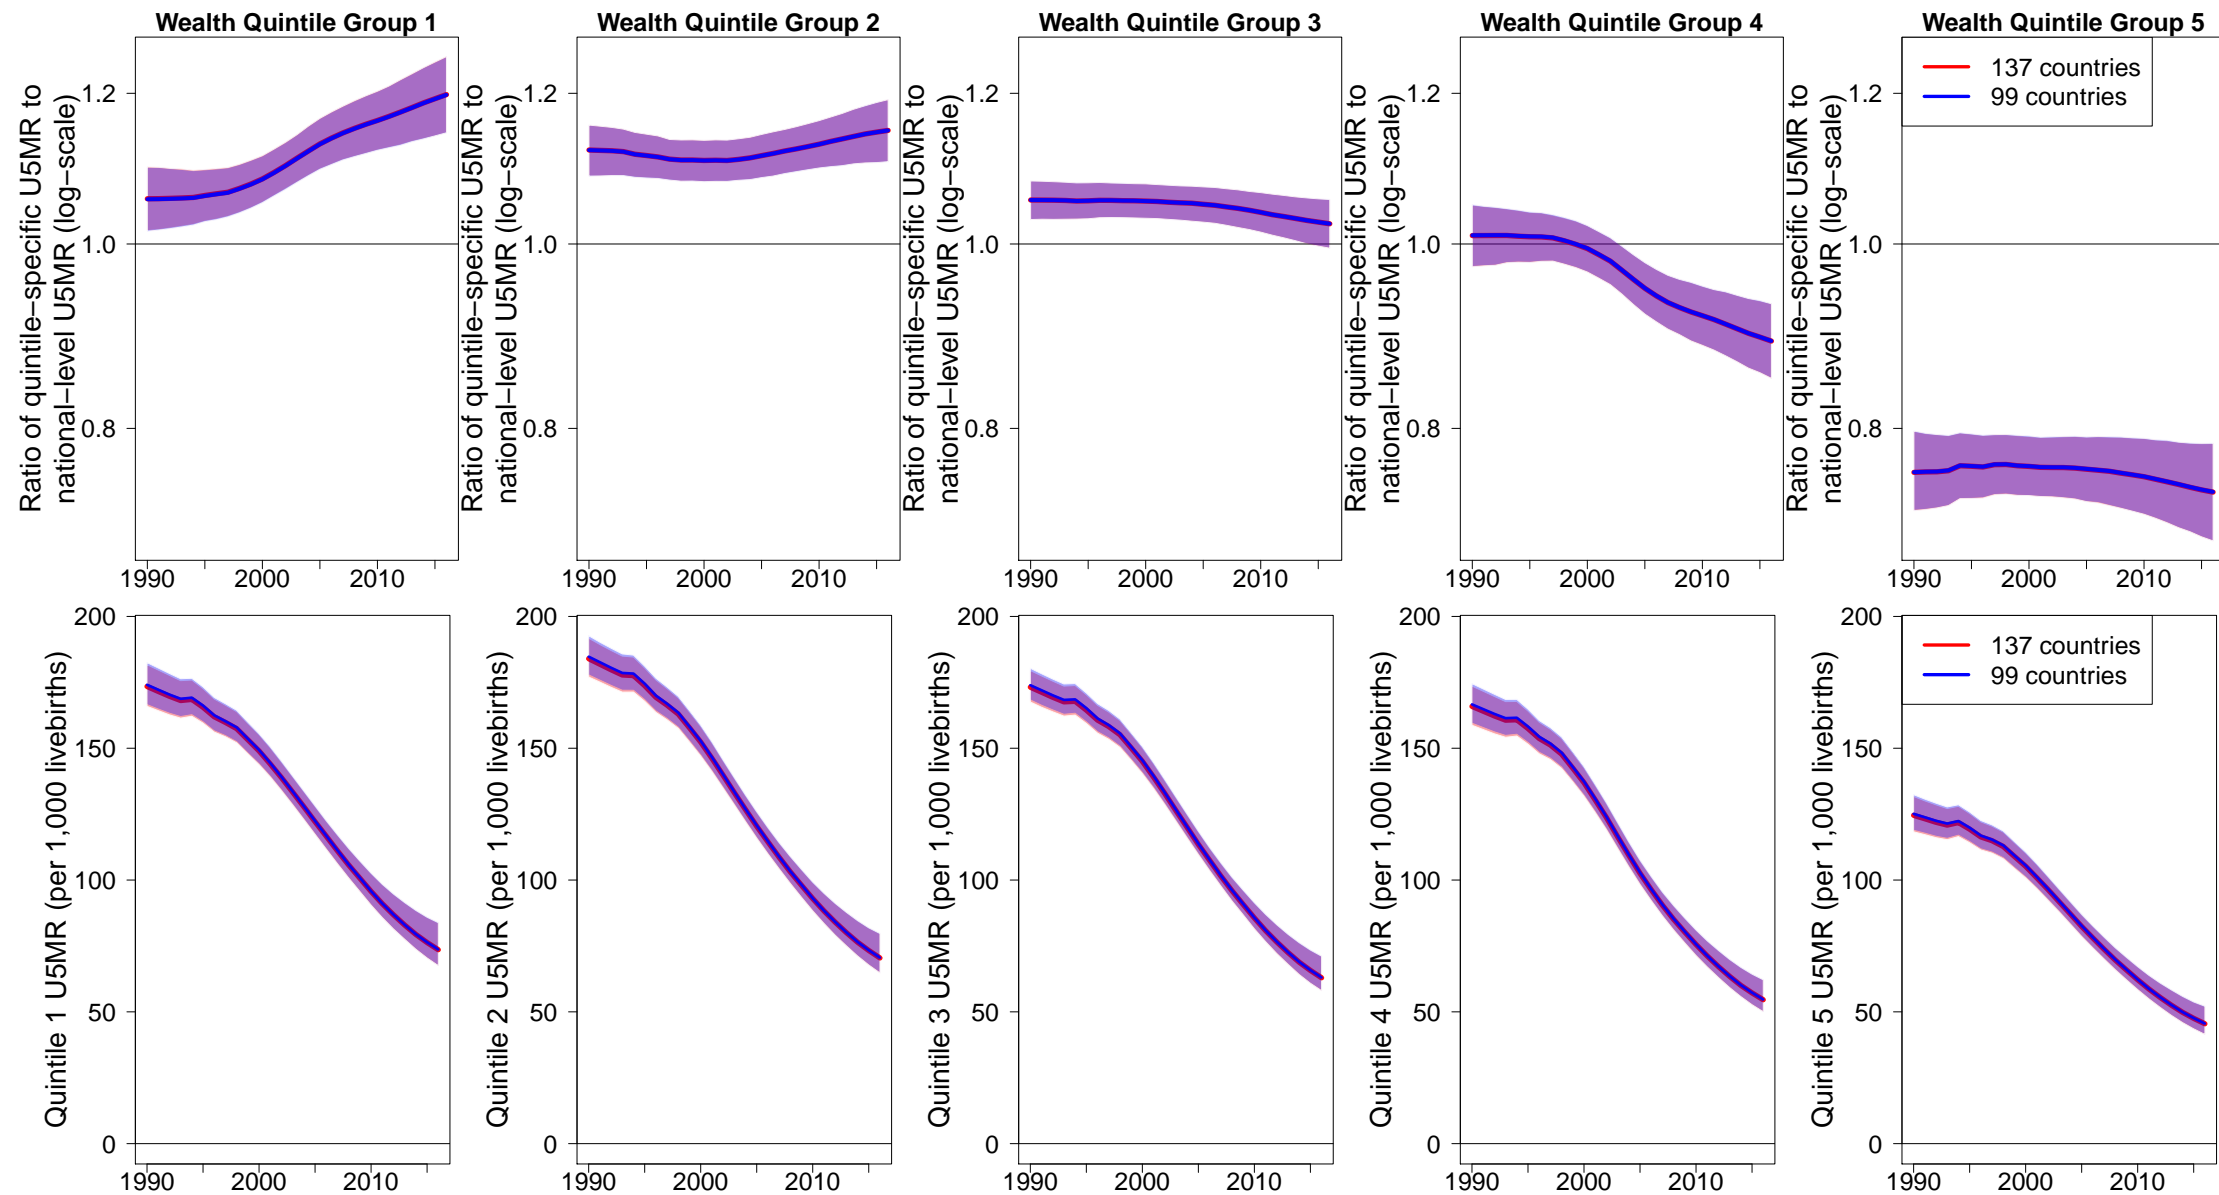



# West and Central Africa

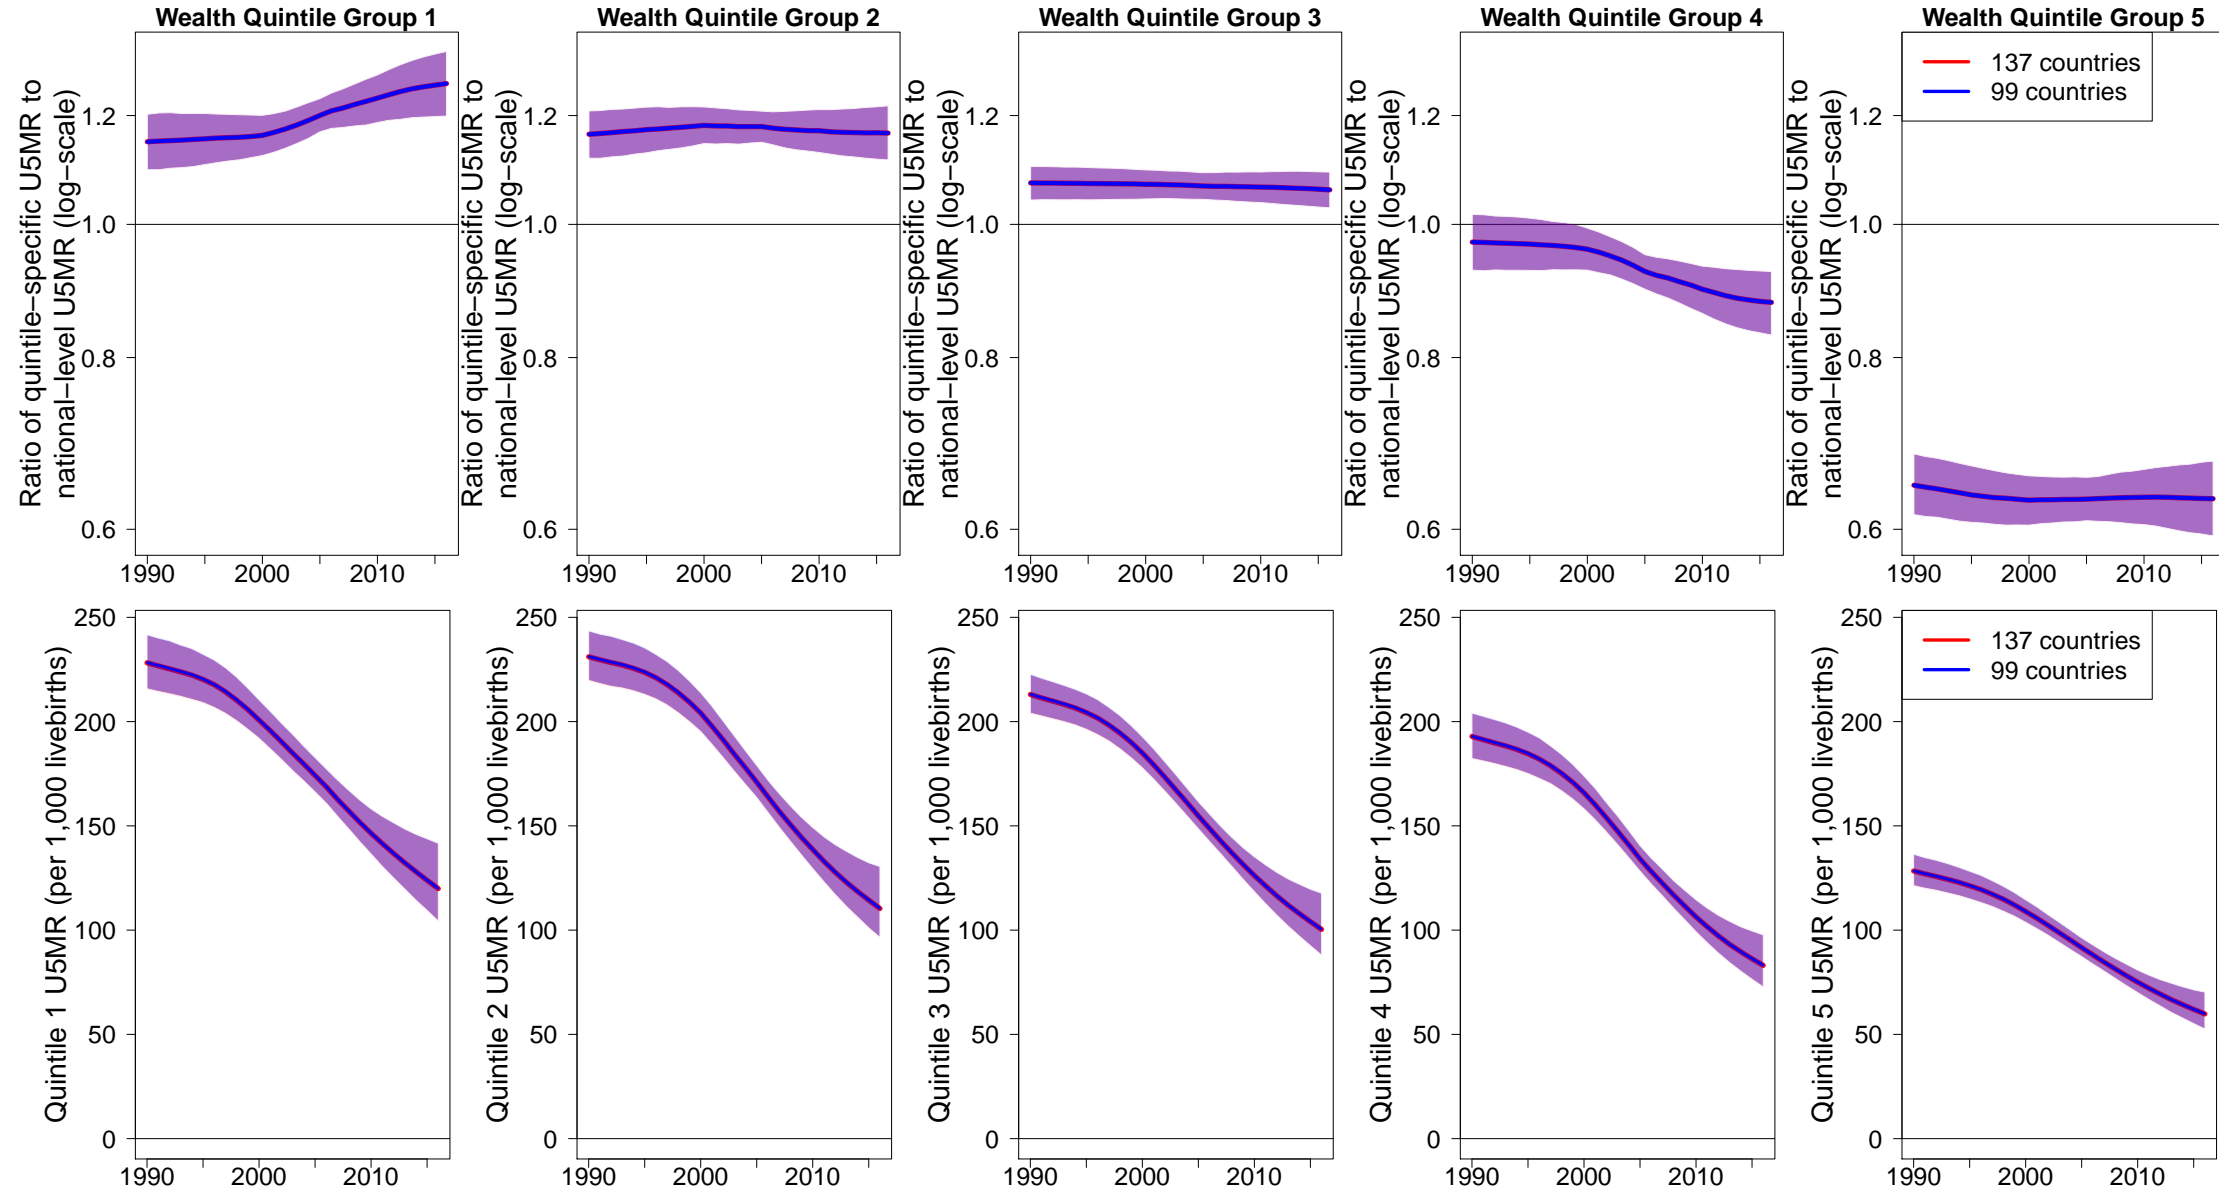

# Latin America and Caribbean

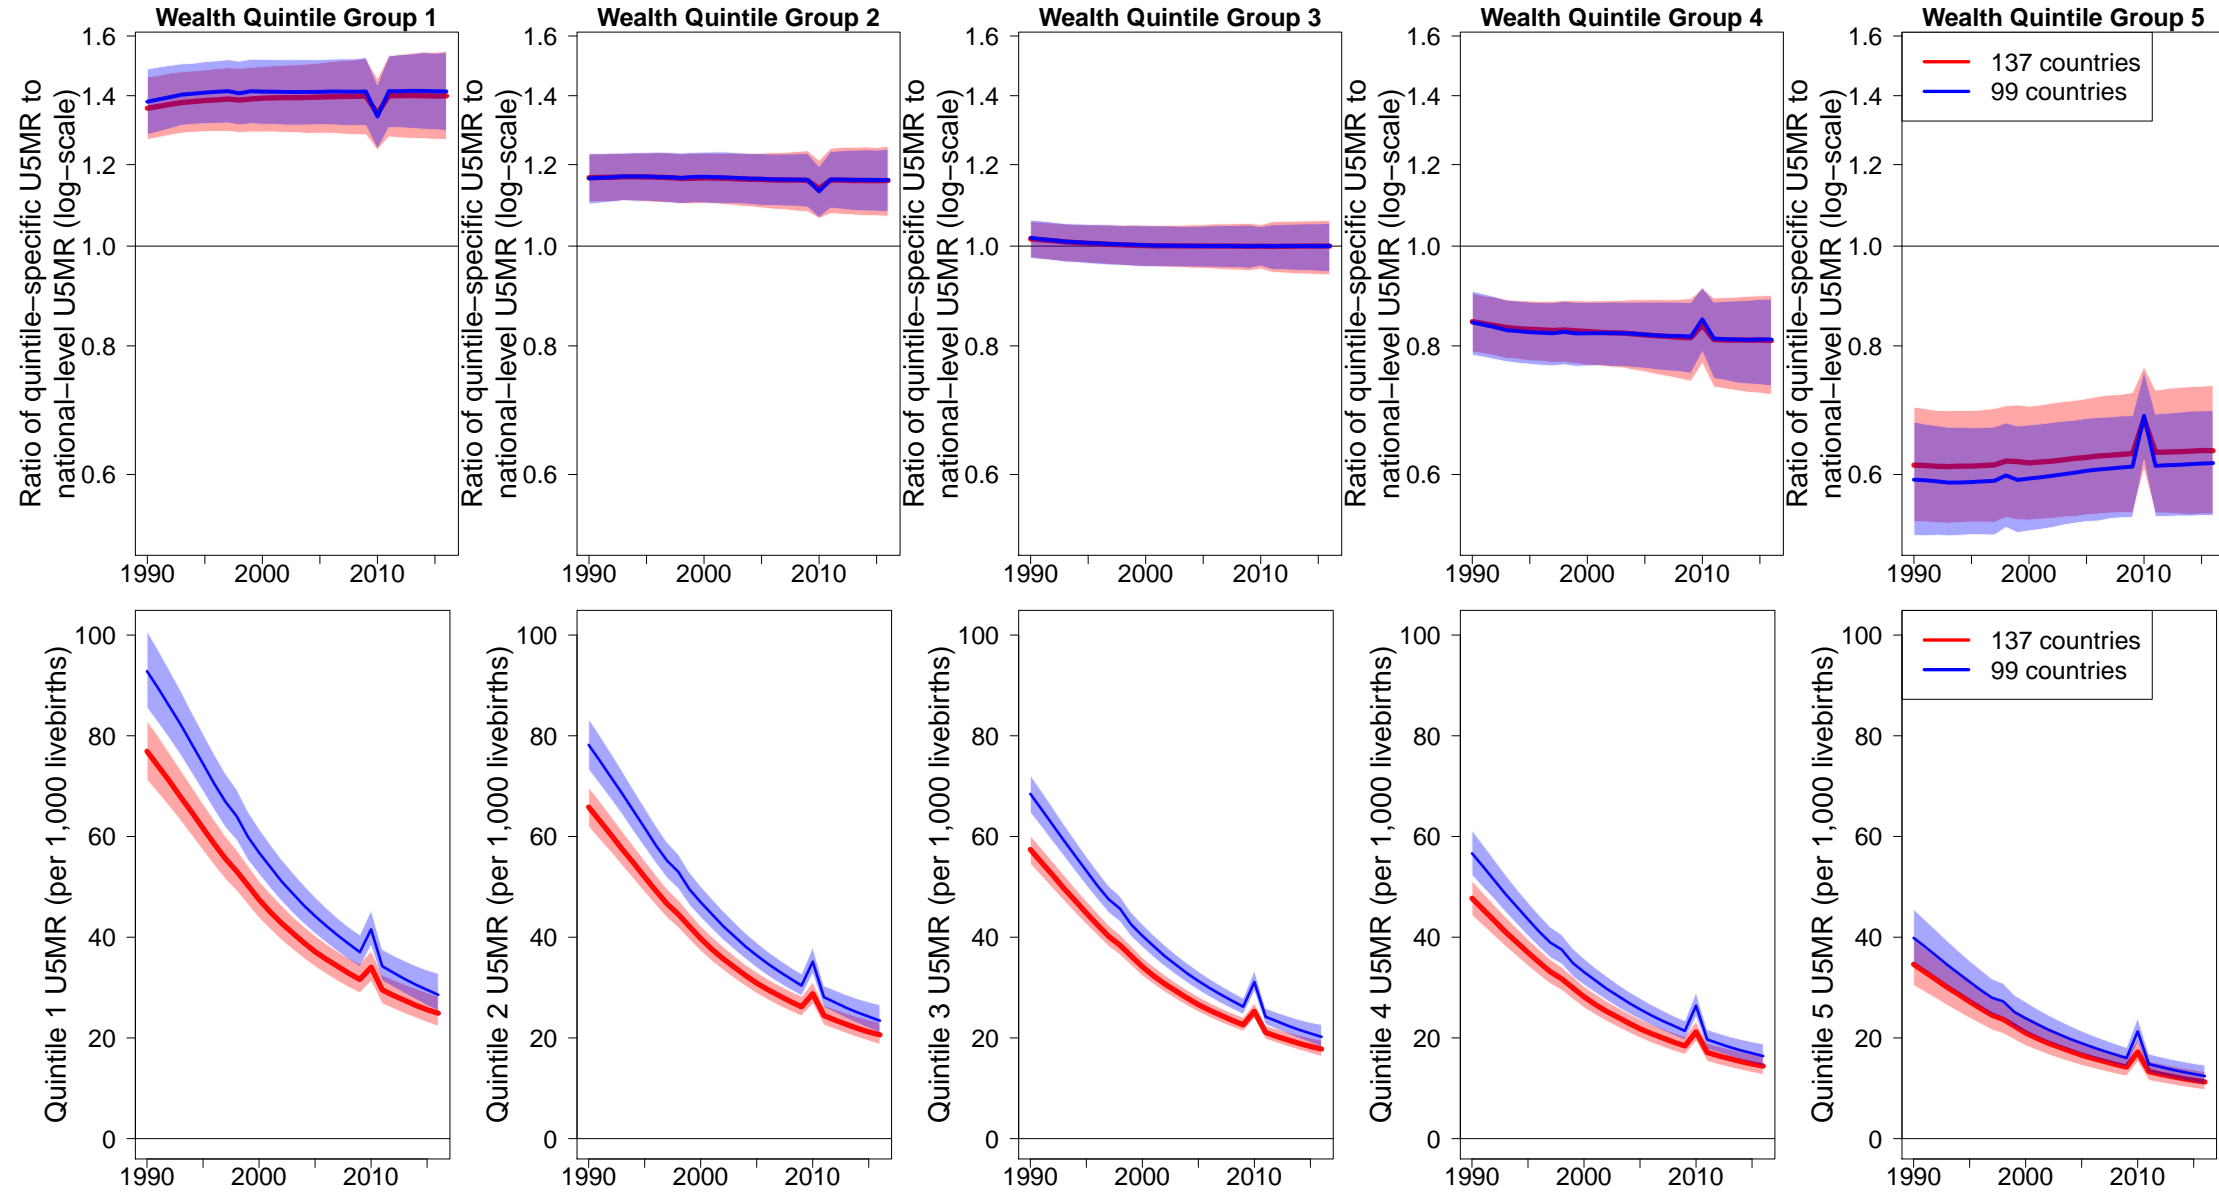

# East Asia and Pacific (excluding China)

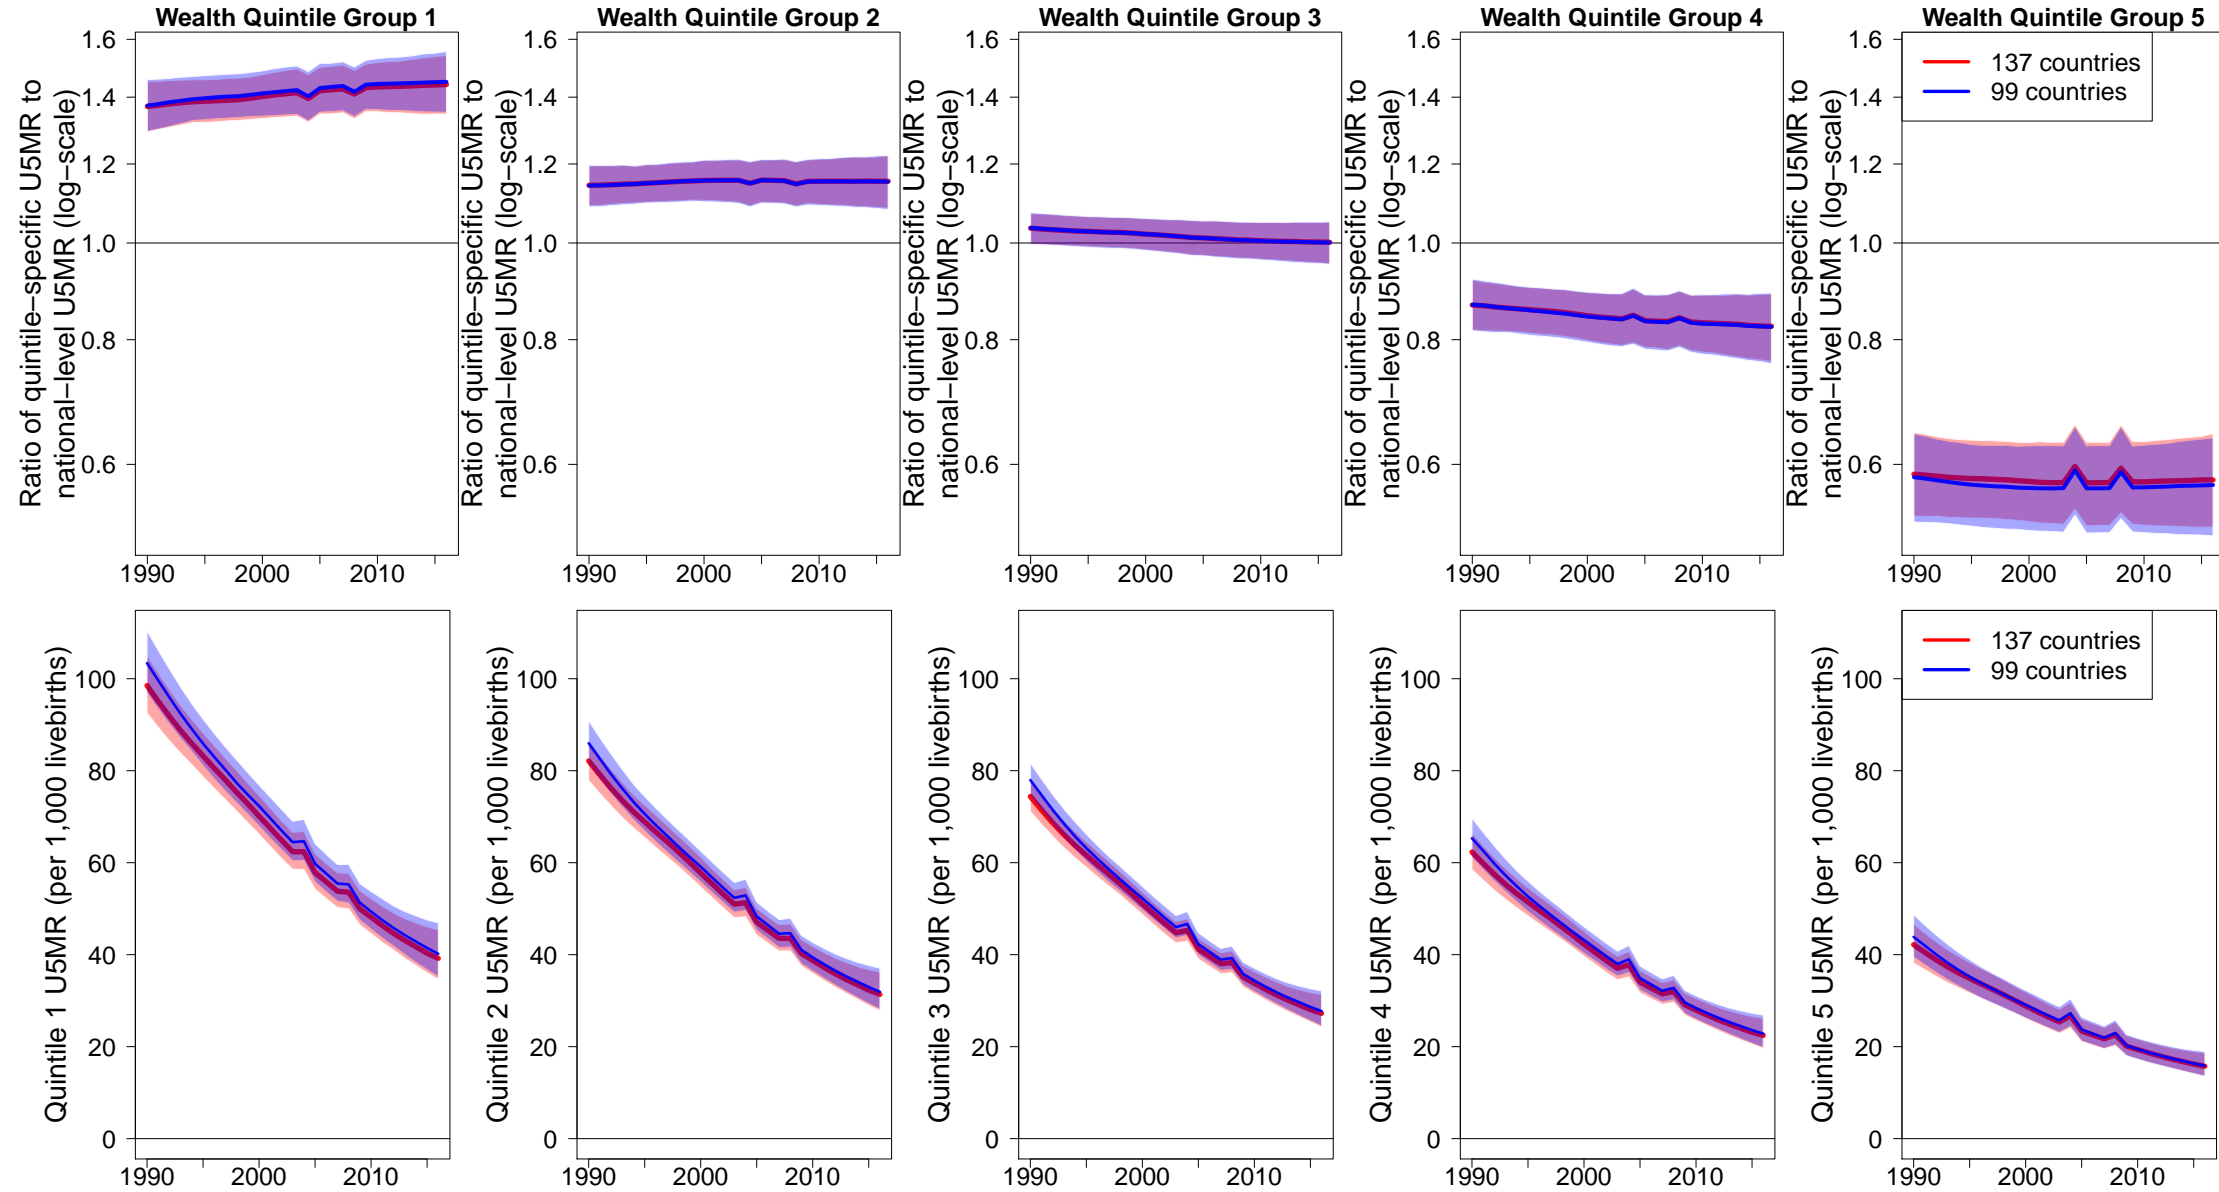

# Middle East and North Africa

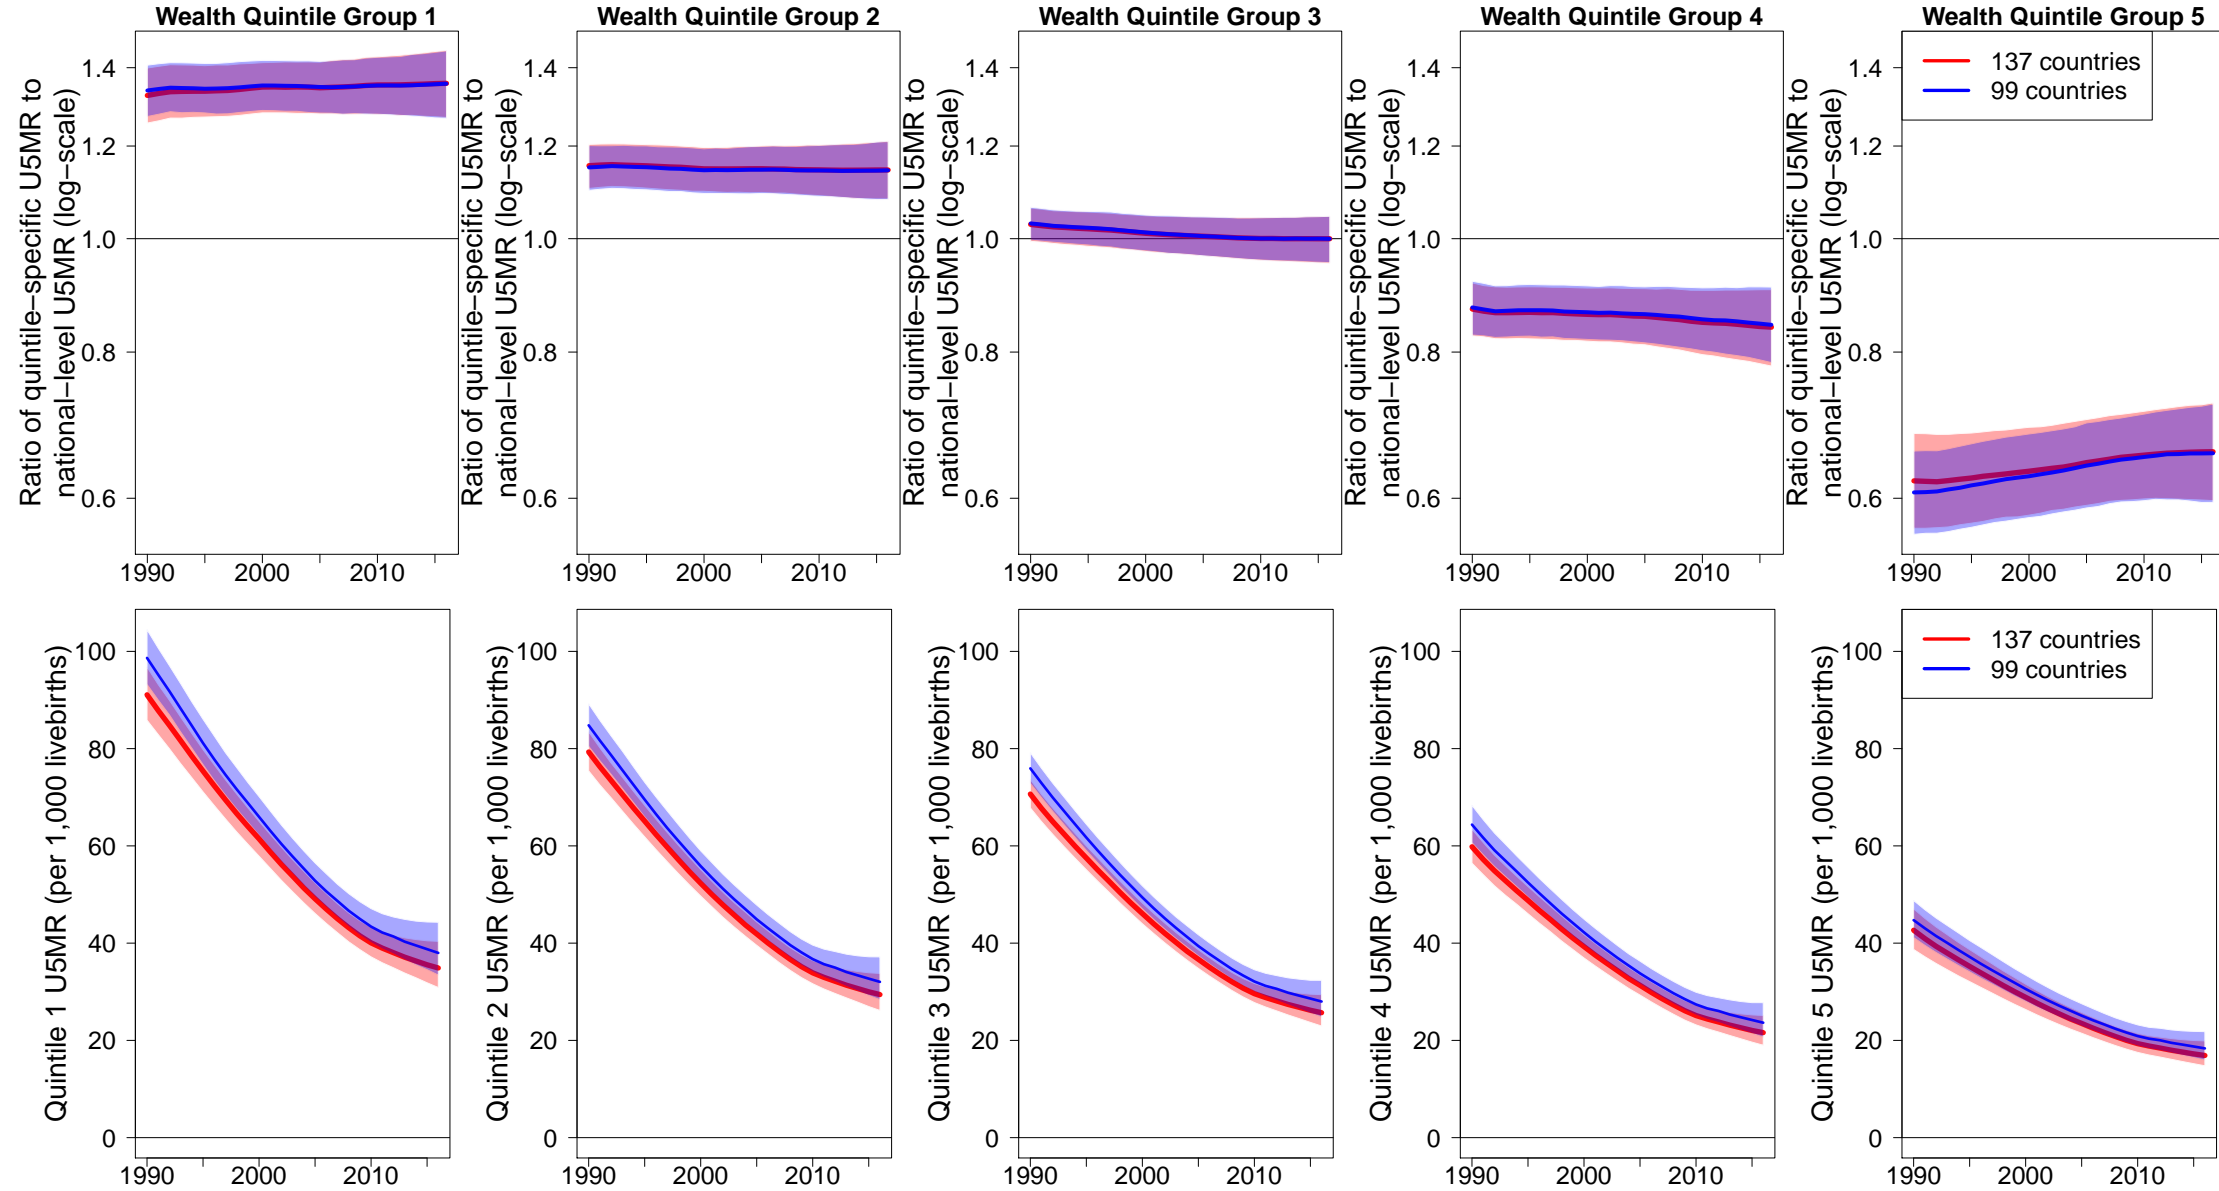

Figure 8: **Aggregated U5MR and percentage of under-5 deaths by wealth quintile, by region.** Solid curves are point estimates from the model. Shaded areas around the solid curves are the 90% uncertainty intervals. Left: U5MR by wealth quintile. Right: percentage of wealth quintile-specific under-5 deaths among national-level under-5 deaths (in %) by wealth quintile. Q1: the 1st wealth quintile, the 20% poorest wealth quintile; Q5: the 5th wealth quintile, the 20% richest wealth quintile.

# South Asia

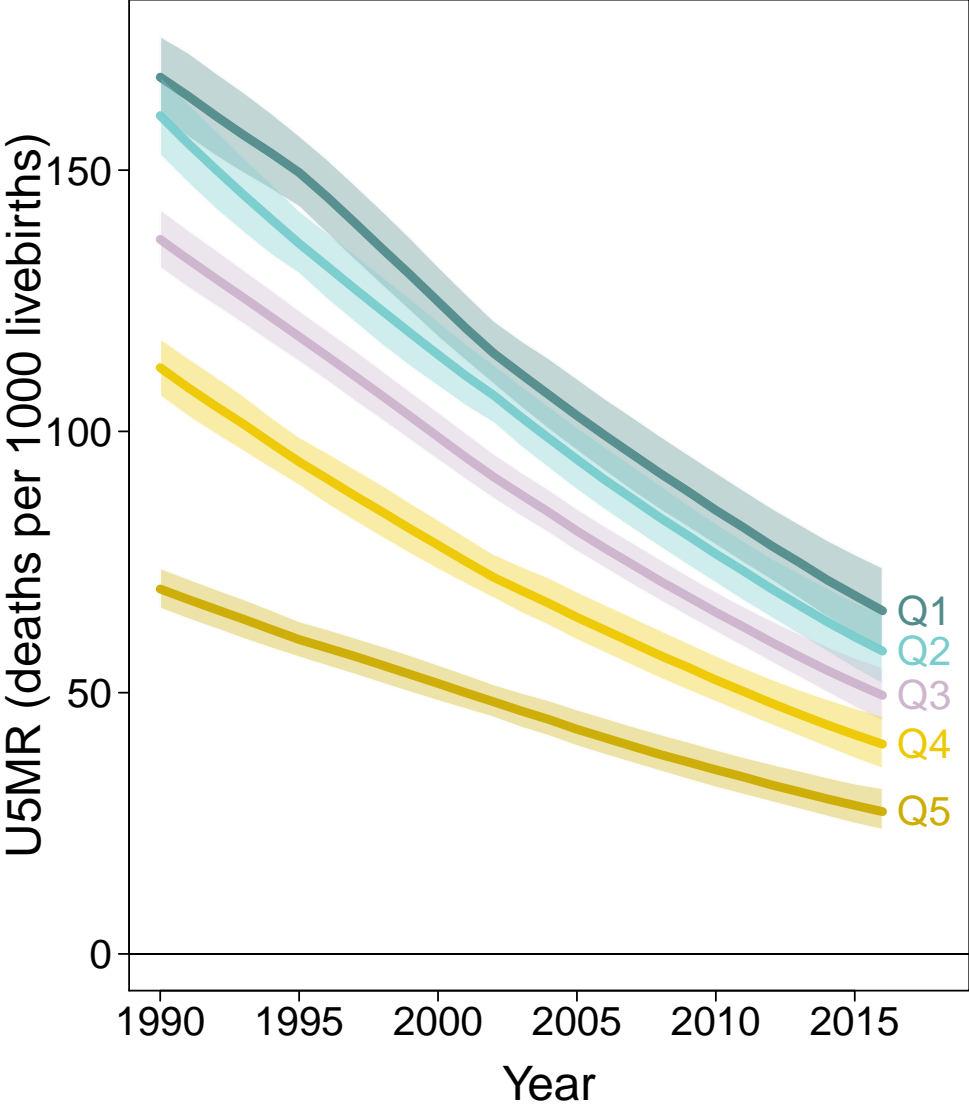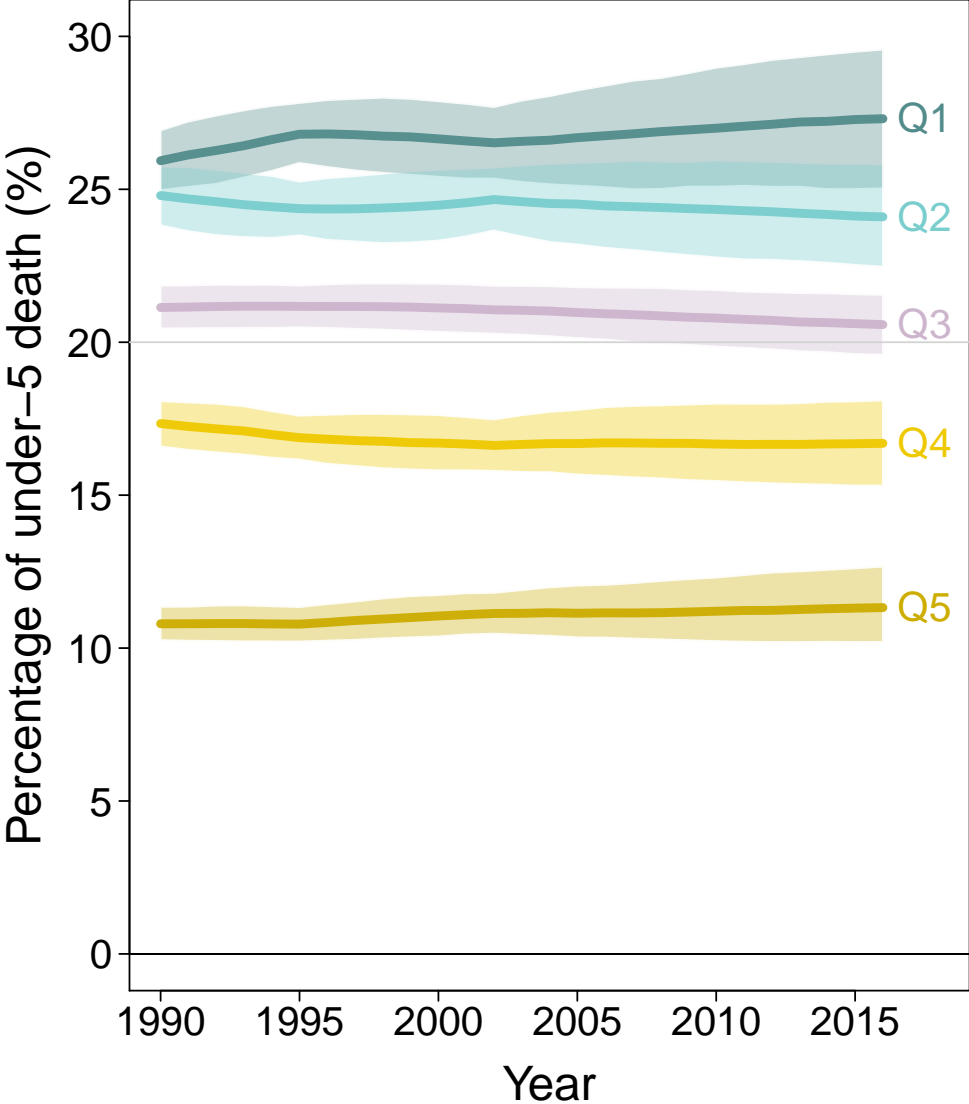

## Eastern Europe and Central Asia

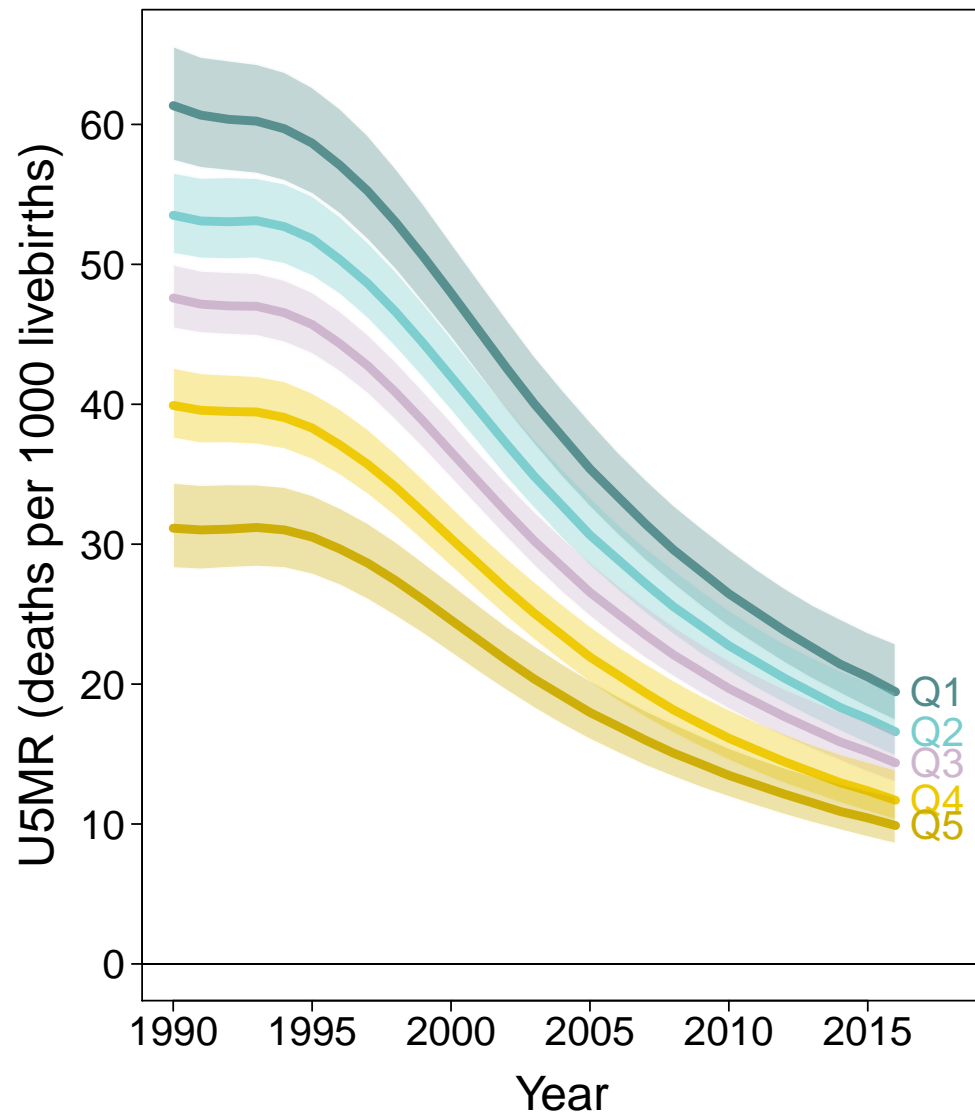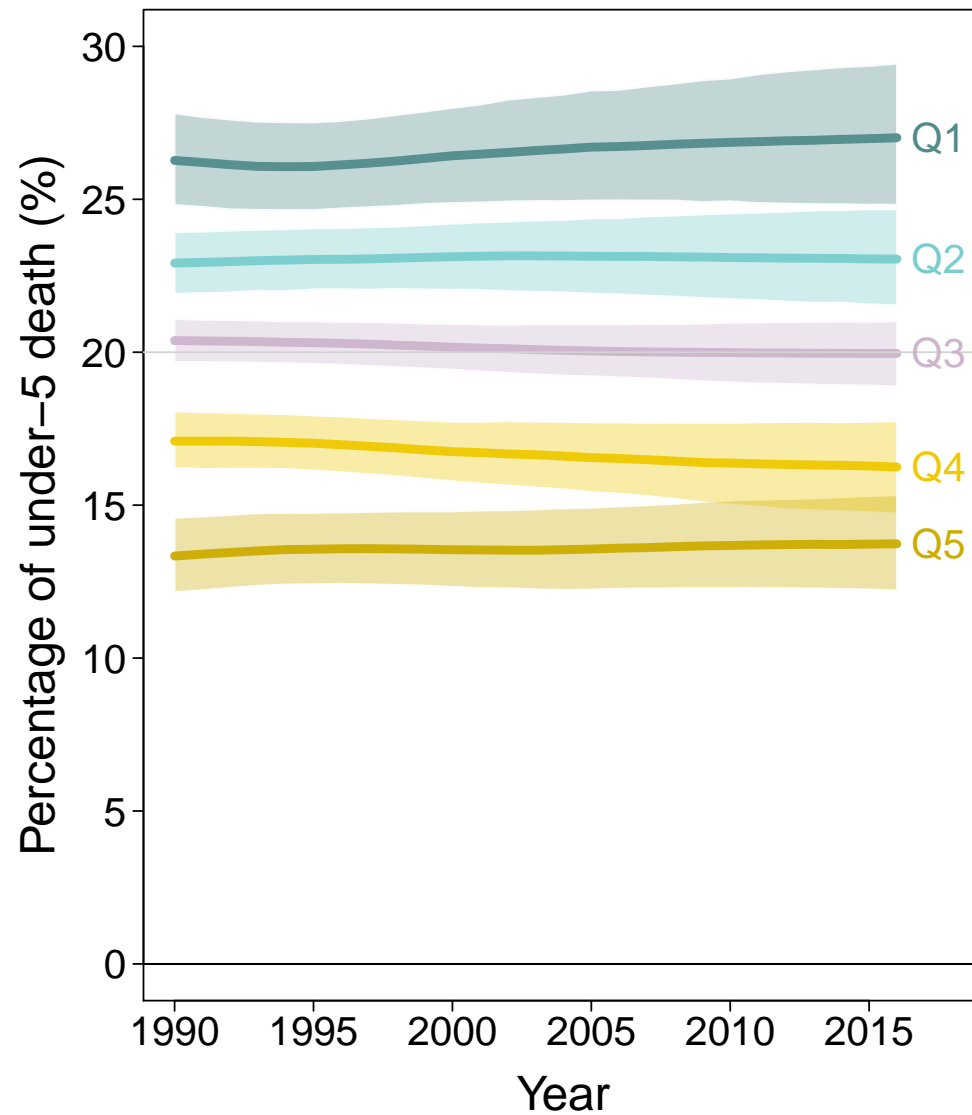

# Eastern and Southern Africa

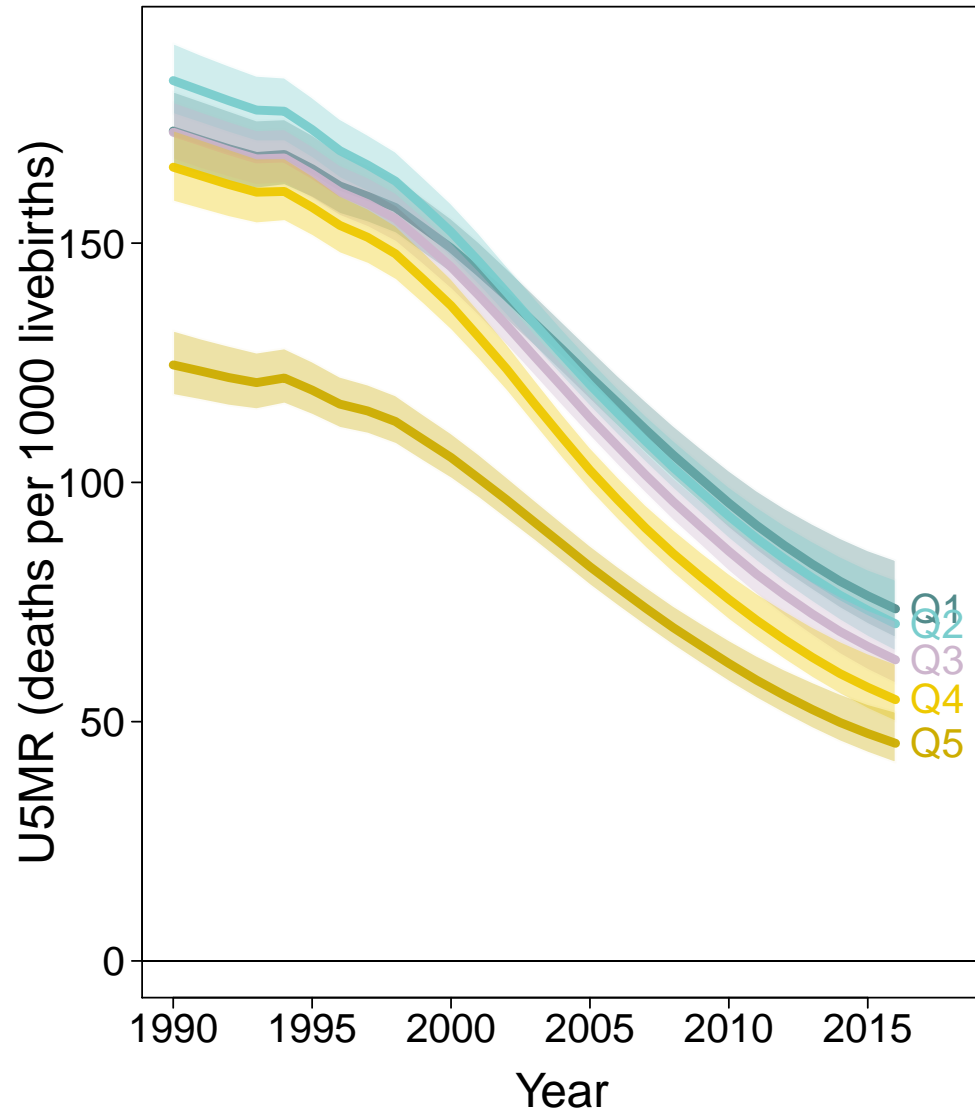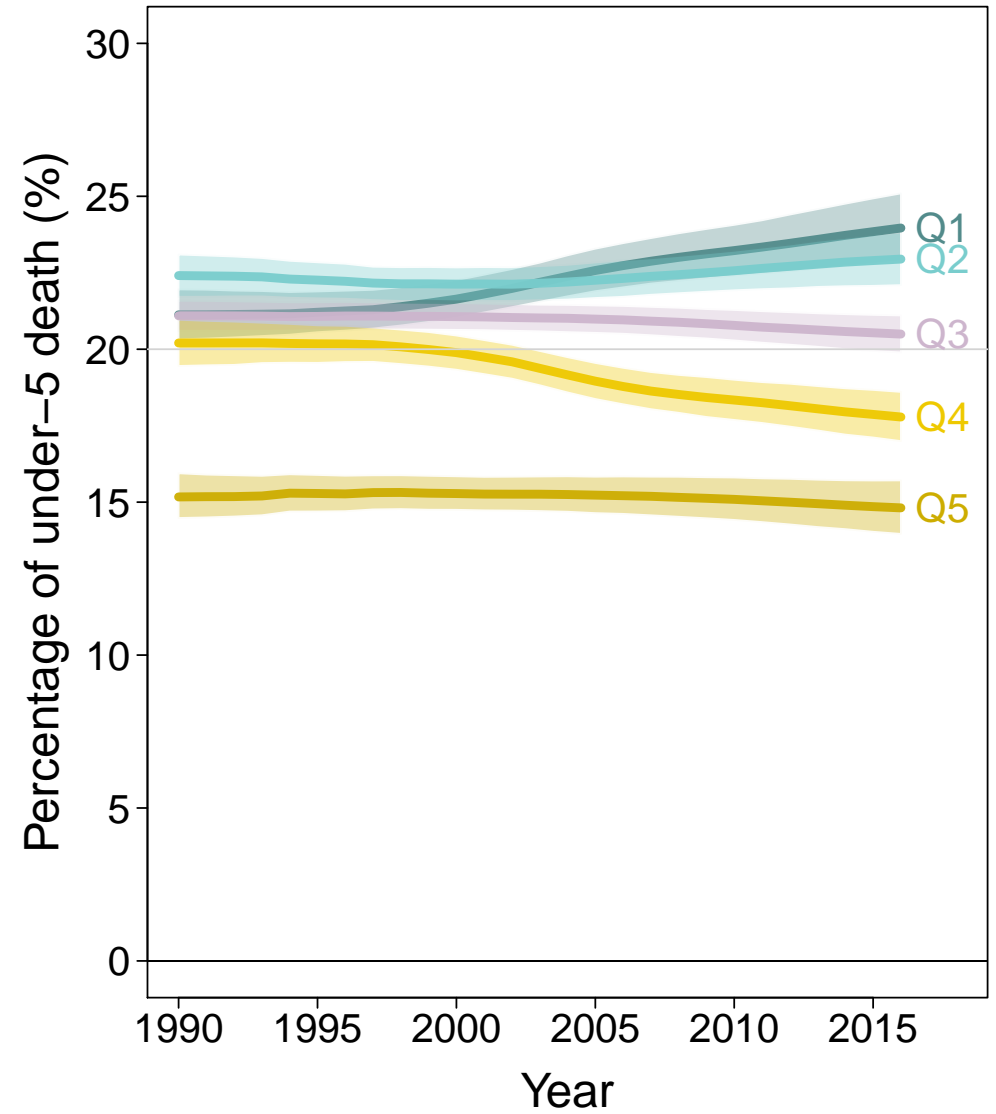



# West and Central Africa

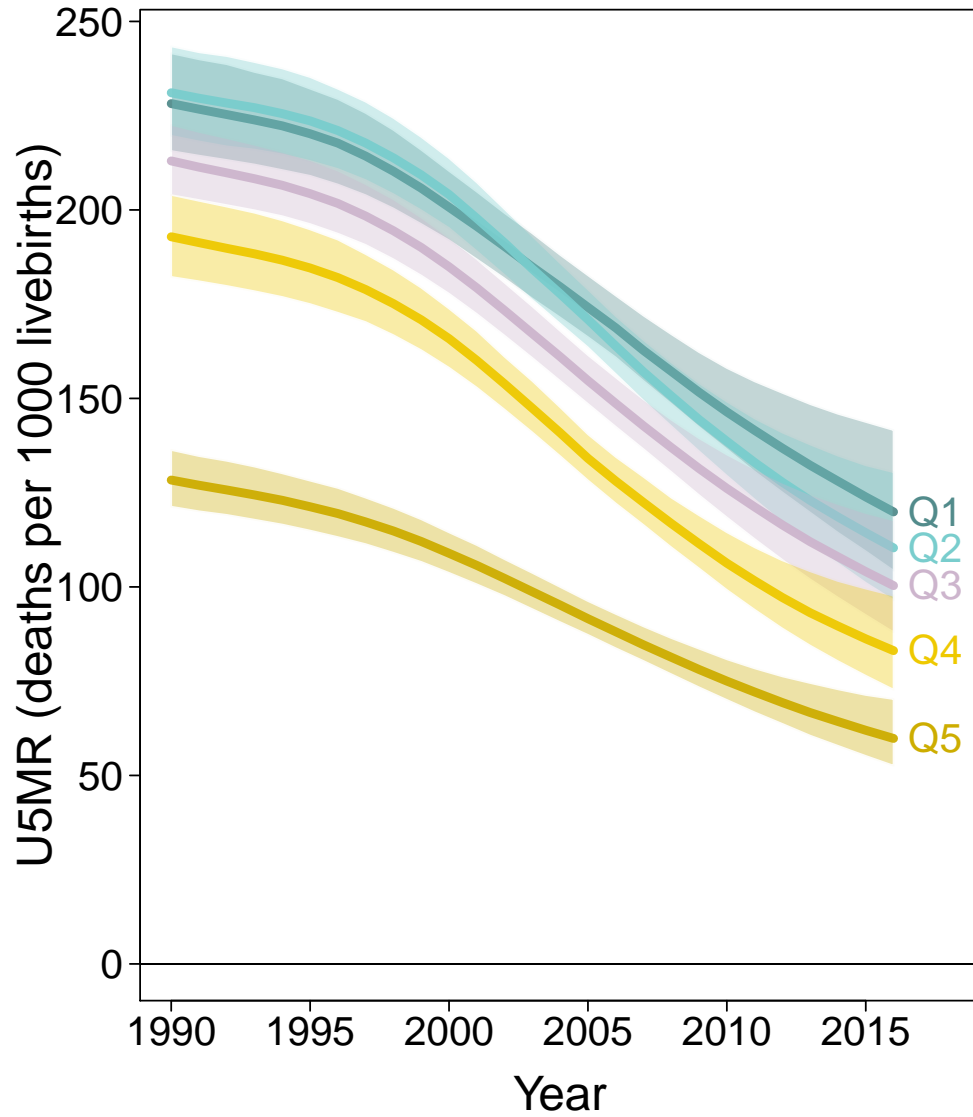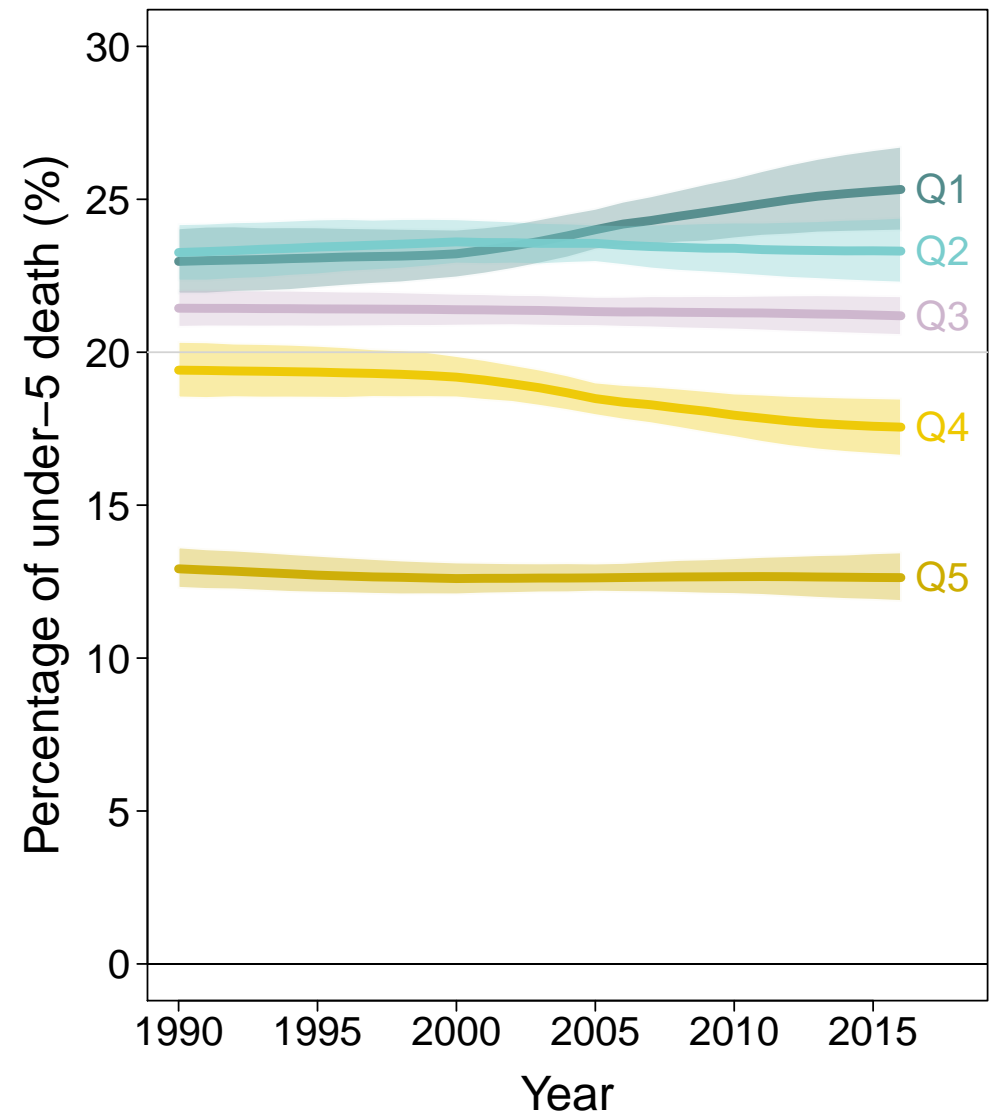

# Latin America and Caribbean

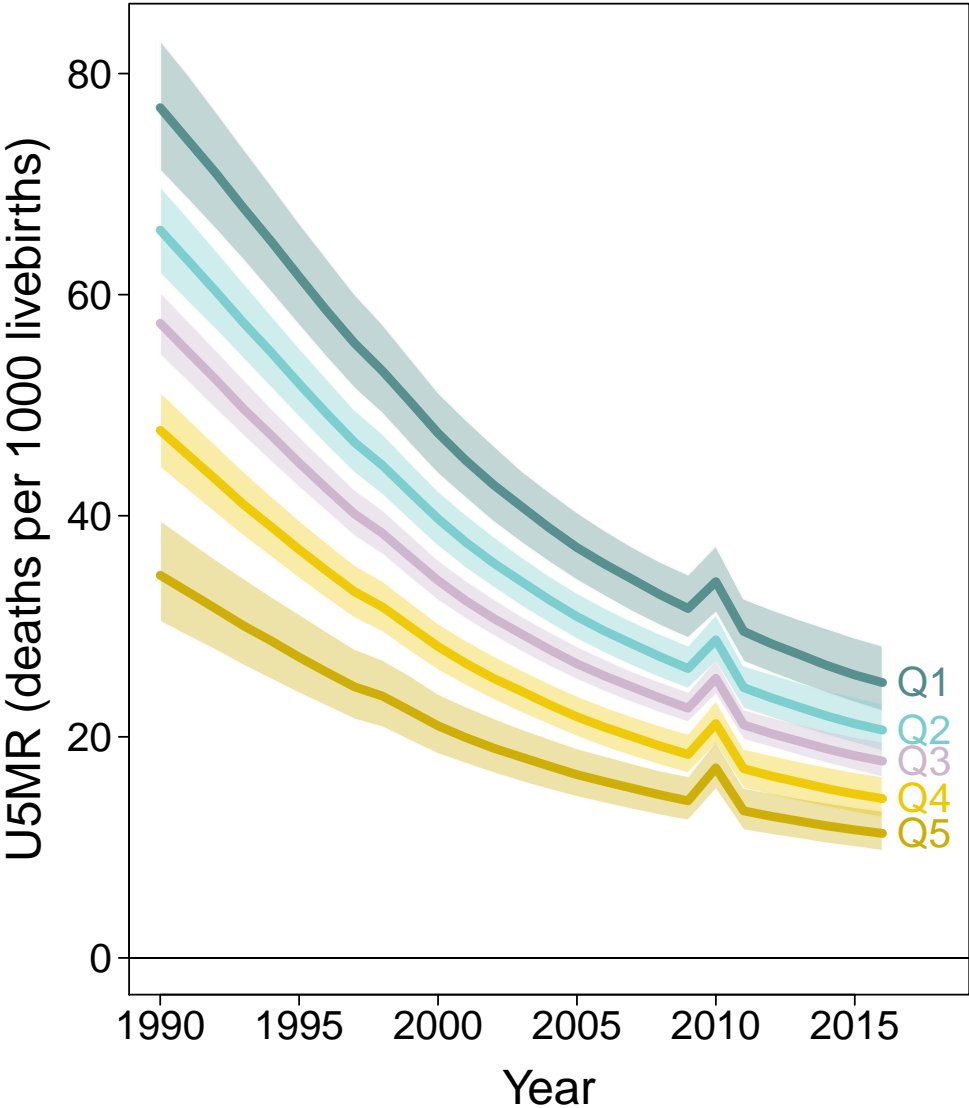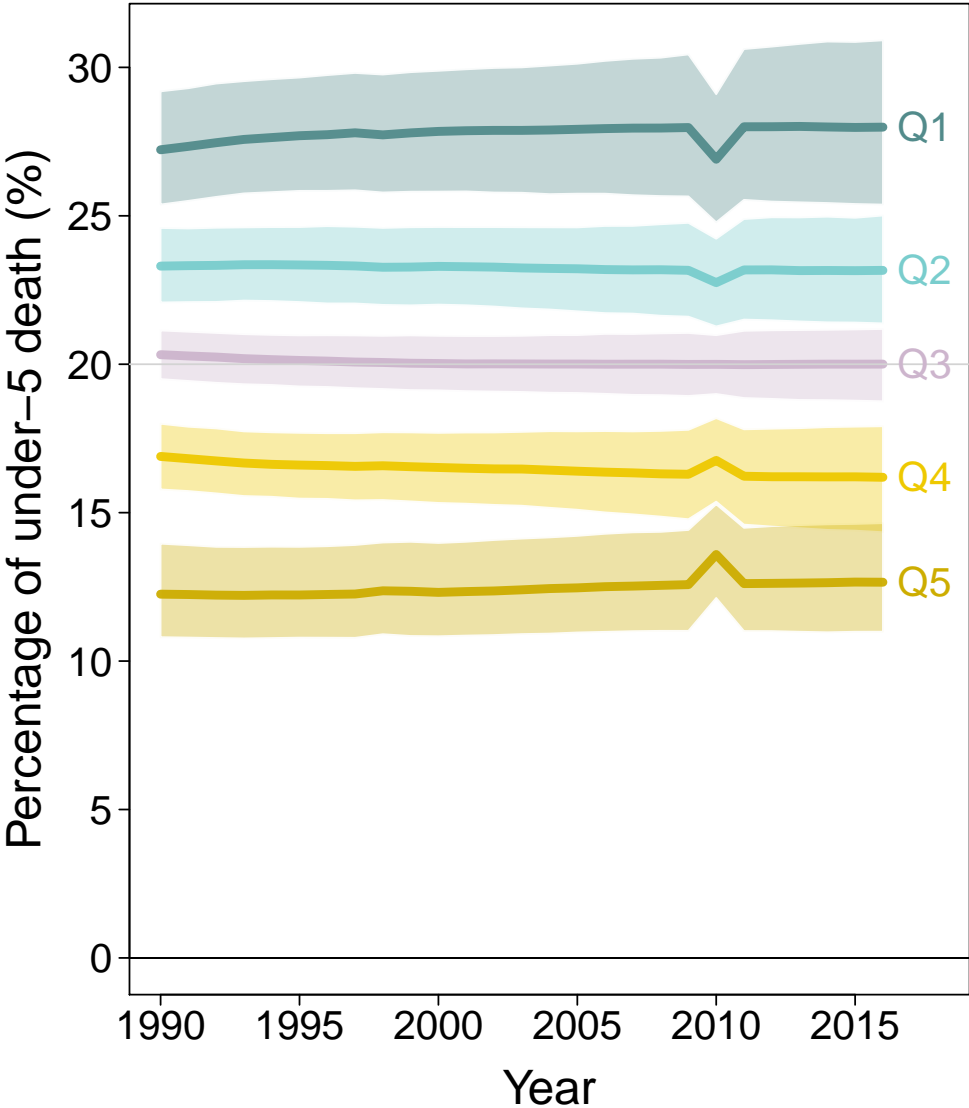

## East Asia and Pacific (excluding China)

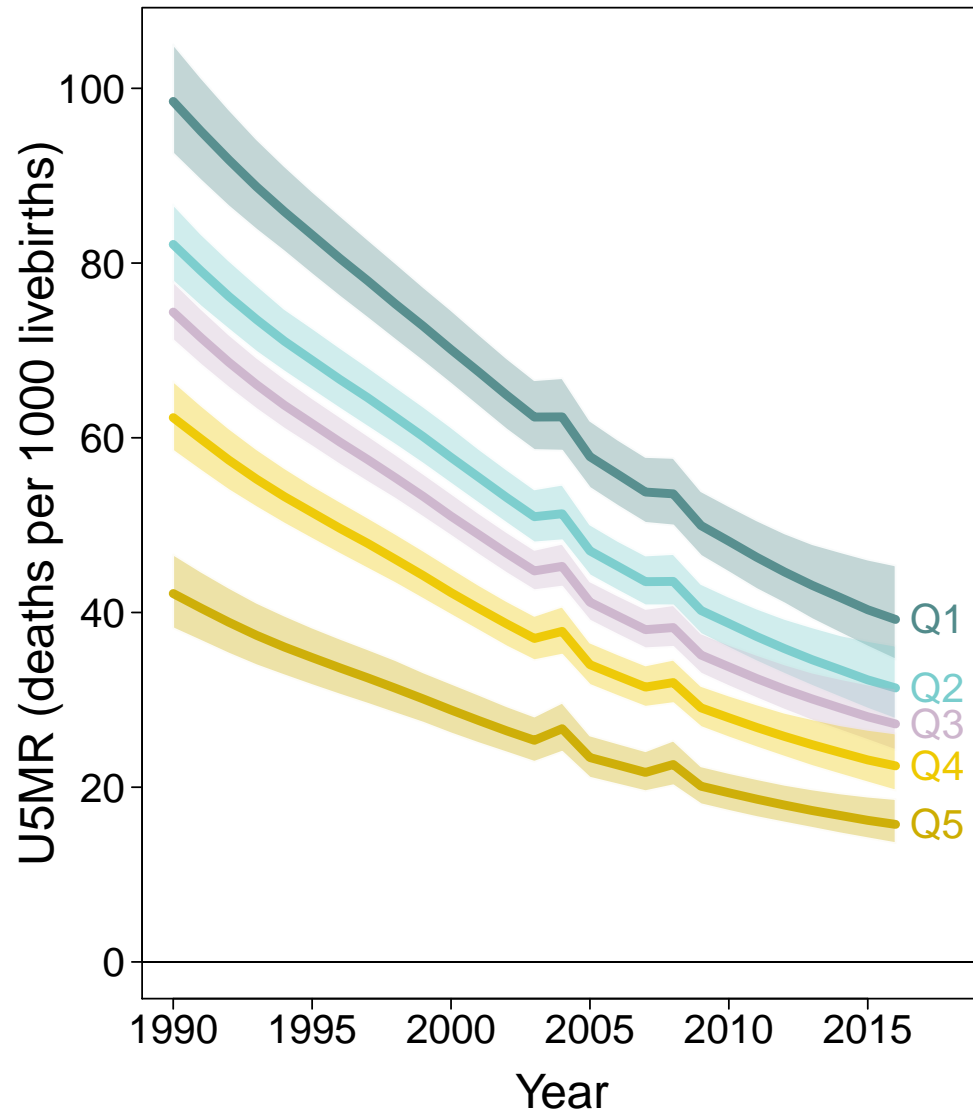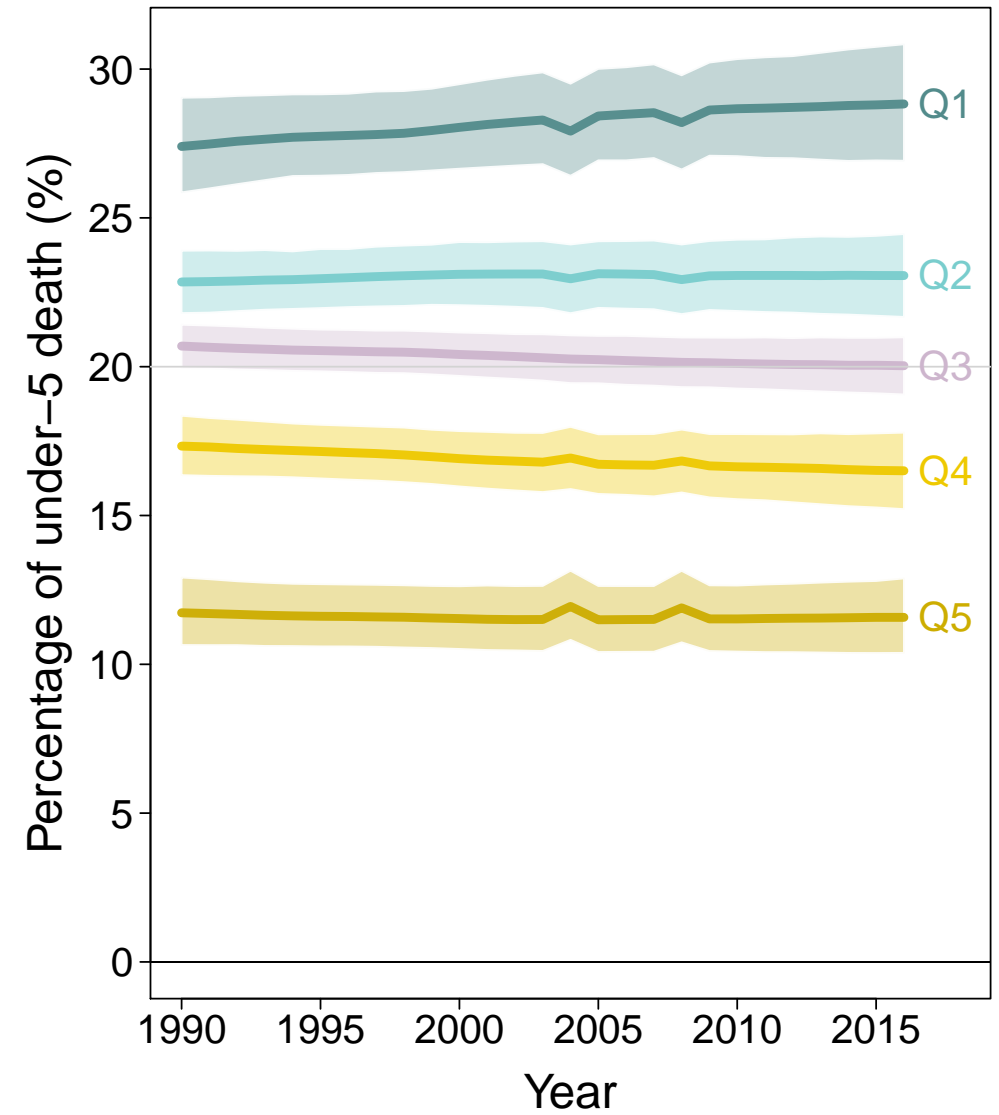

# Middle East and North Africa

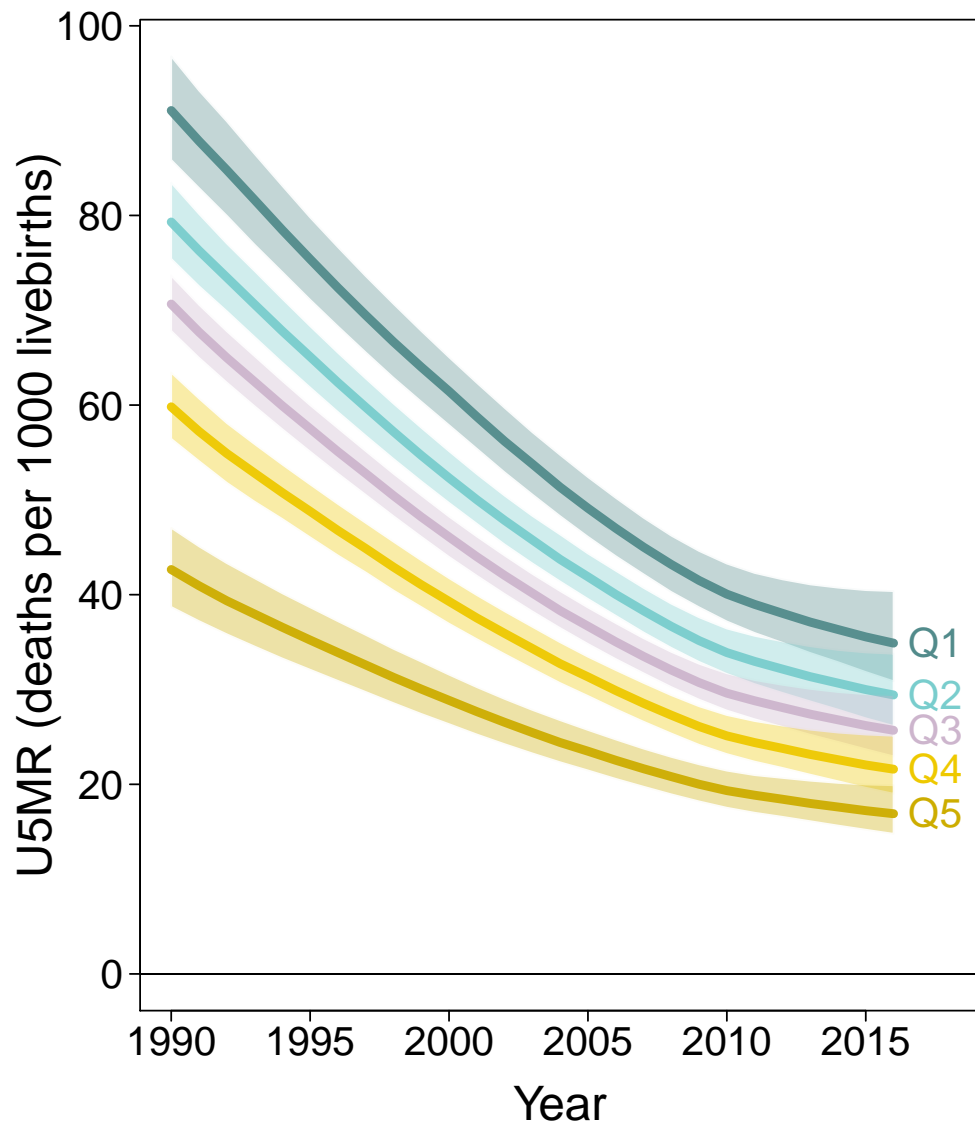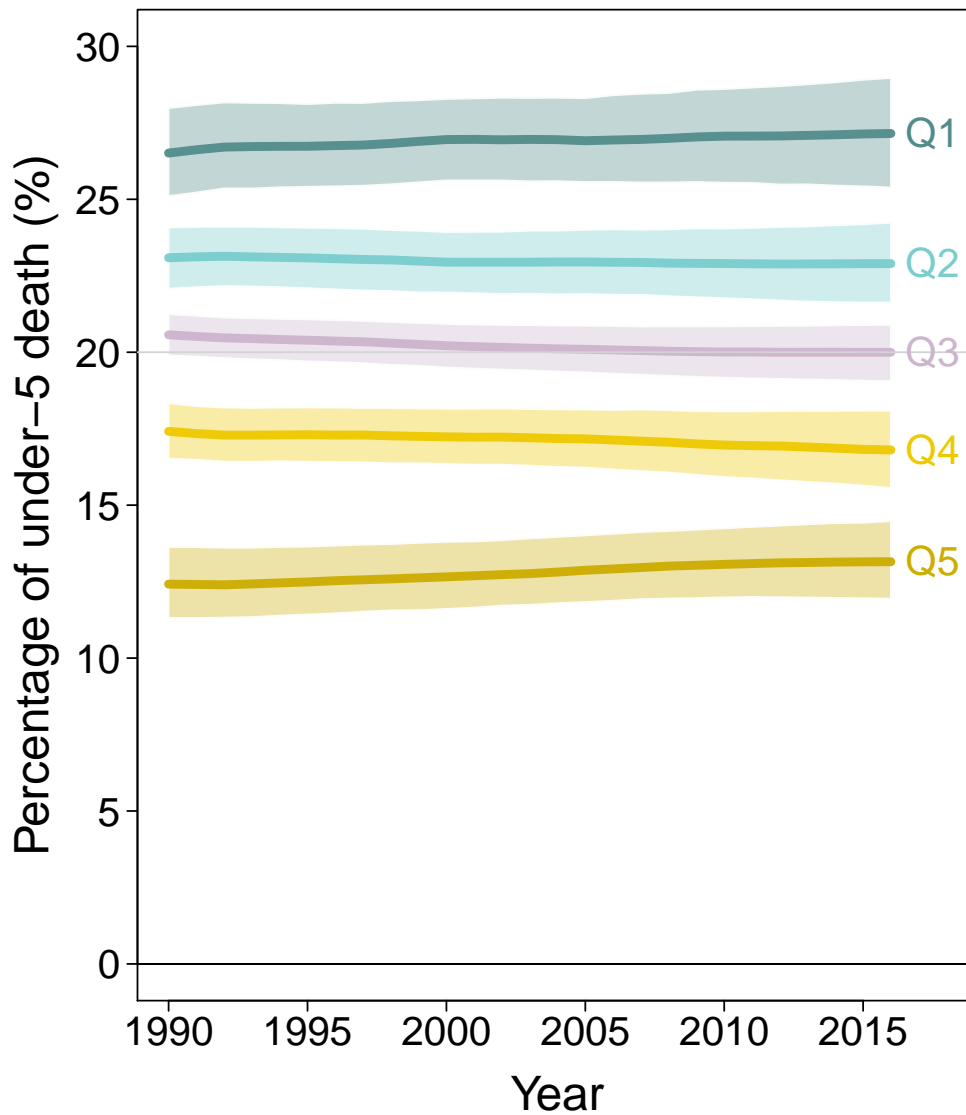

Figure 9: **U5MR by wealth quintile, for the 99 countries with empirical data.** Solid curves are point estimates from the model. Shaded areas around the solid curves are the 90% uncertainty intervals. Vertical grey lines indicate the most recent reference year of data points for each country. Q1: the 1st wealth quintile, the 20% poorest wealth quintile; Q5: the 5th wealth quintile, the 20% richest wealth quintile.

### Afghanistan

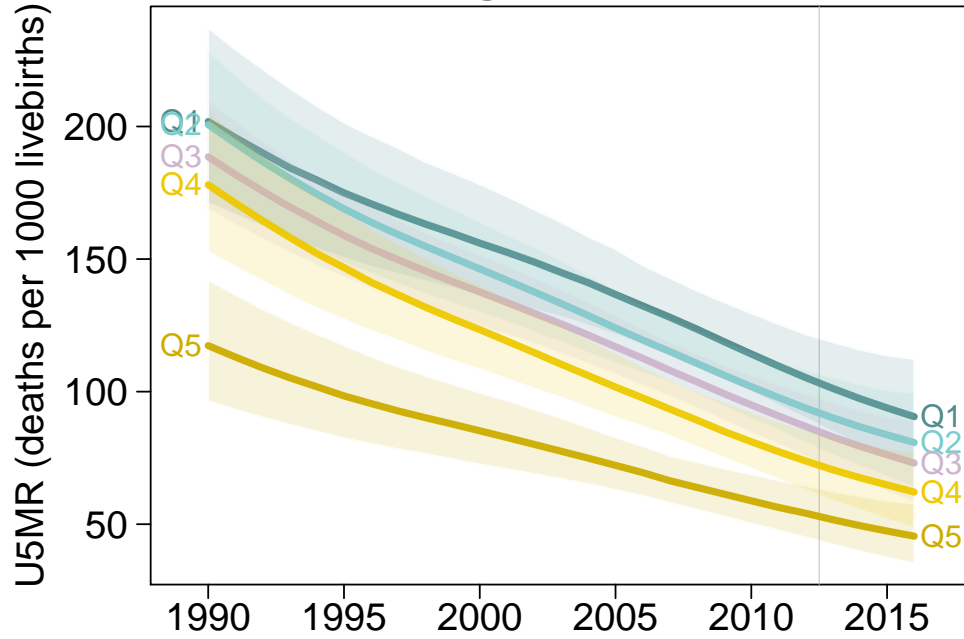

### Albania

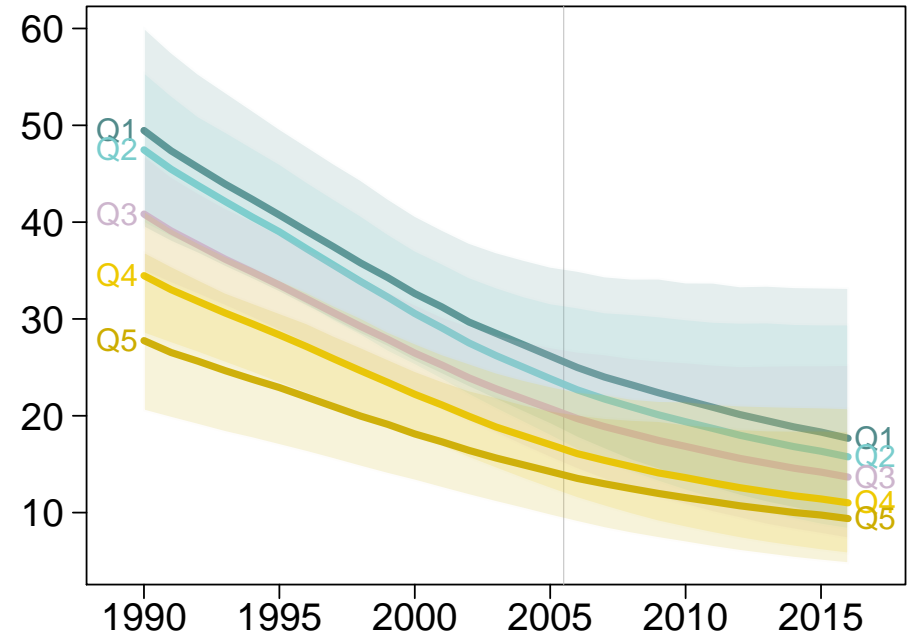

### Algeria

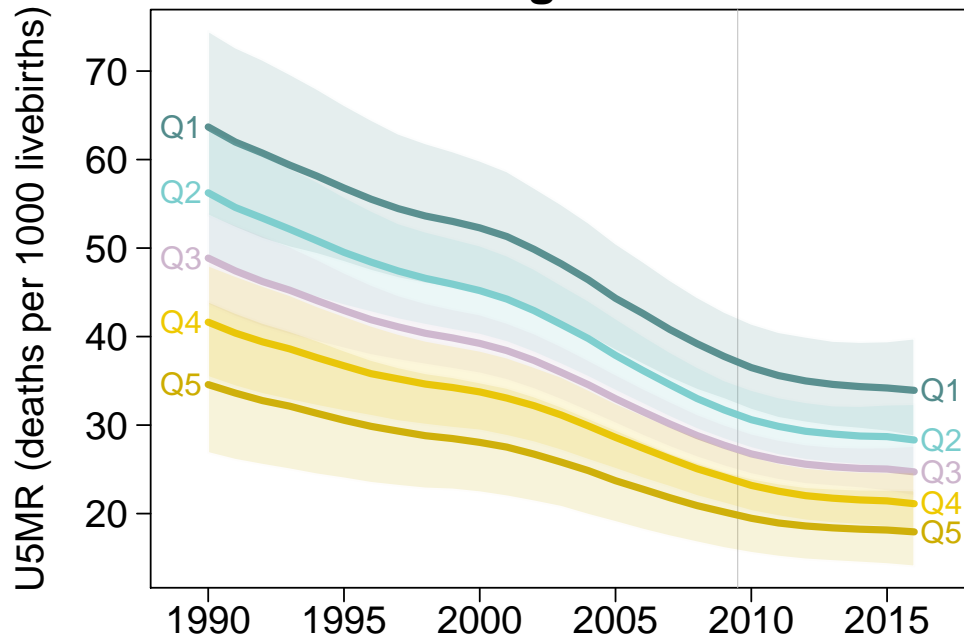

### Angola

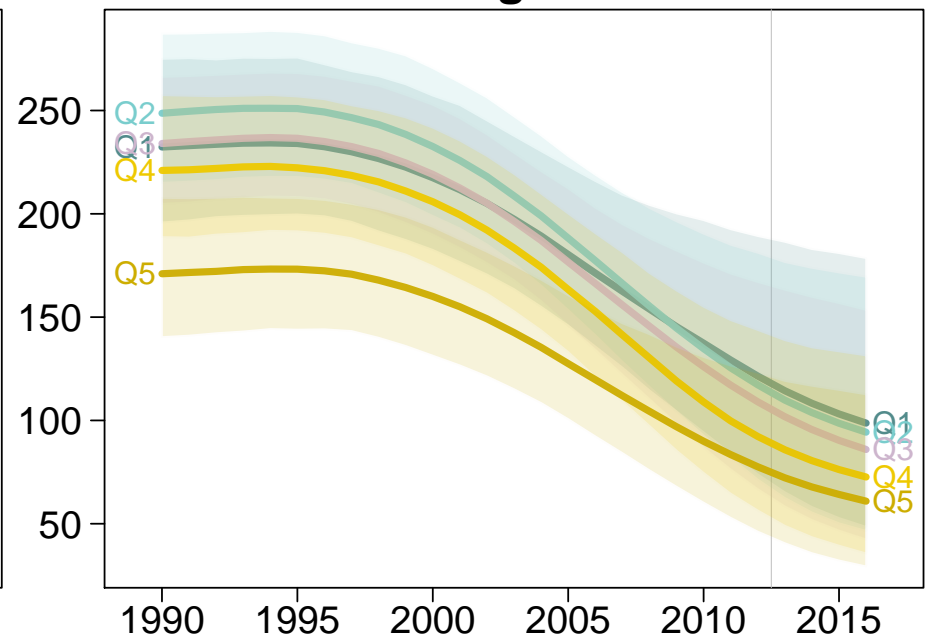

### Armenia

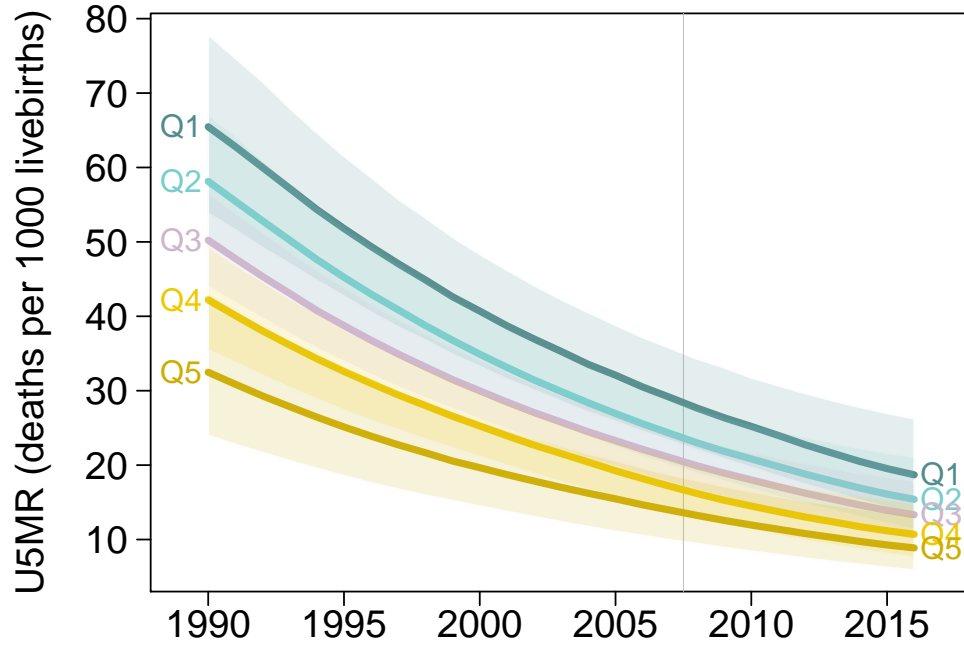

### Azerbaijan

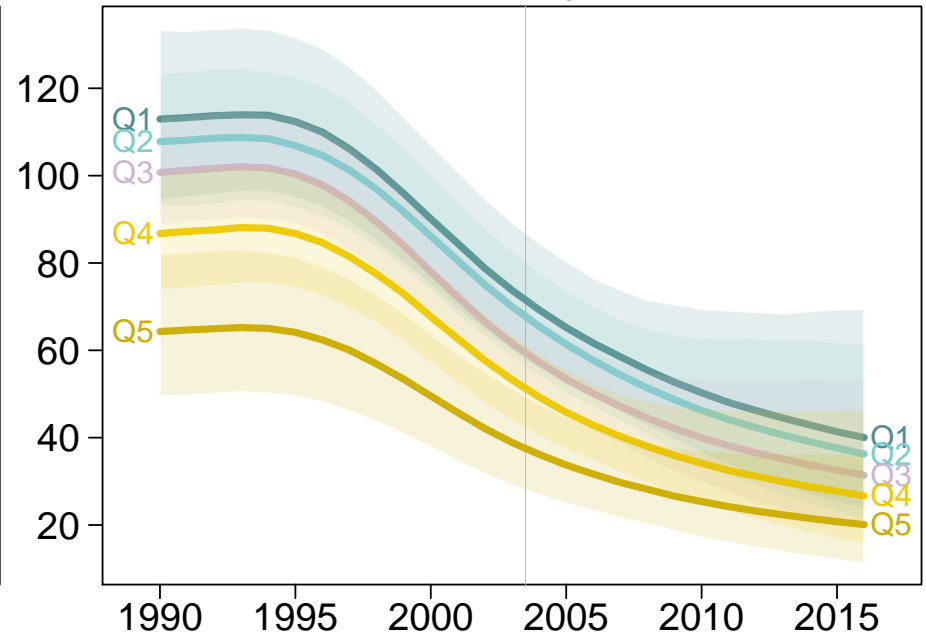

### Bangladesh

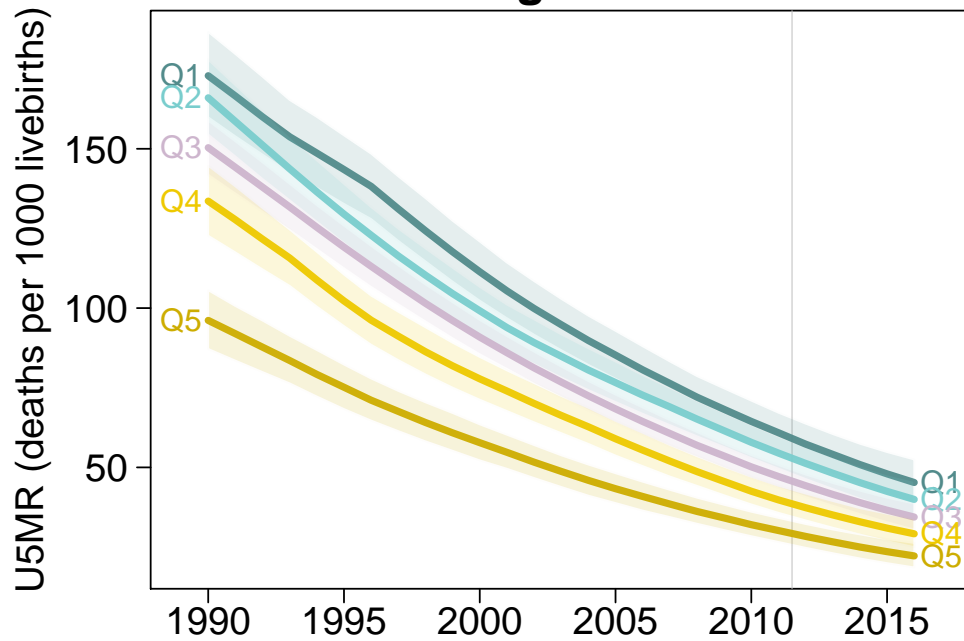

### Belarus

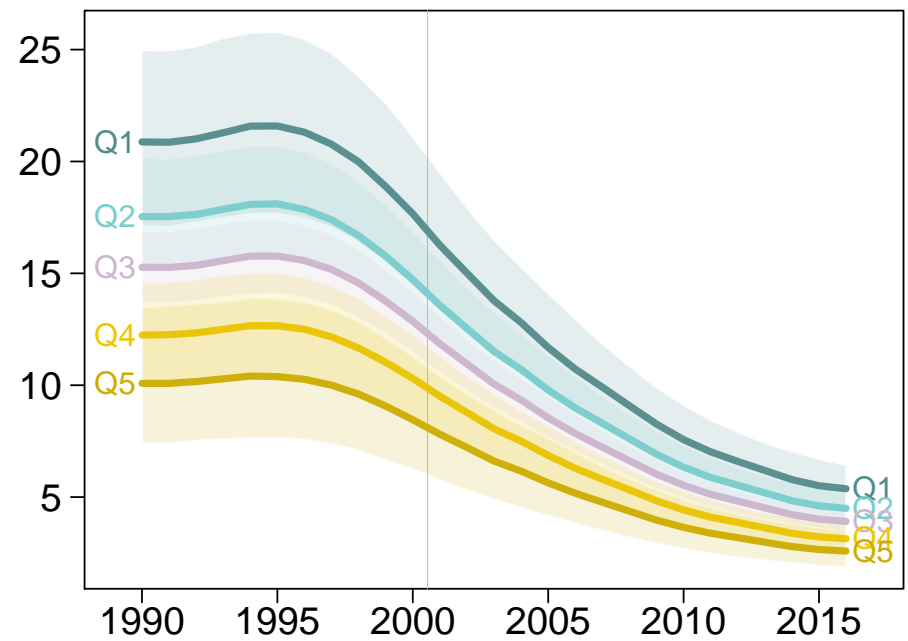

### Belize

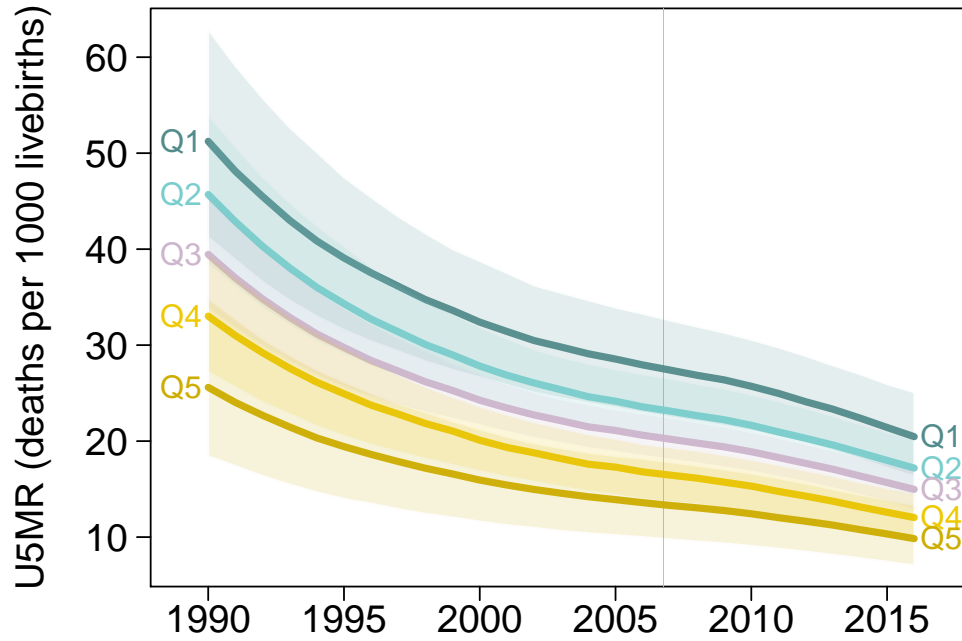

### Benin

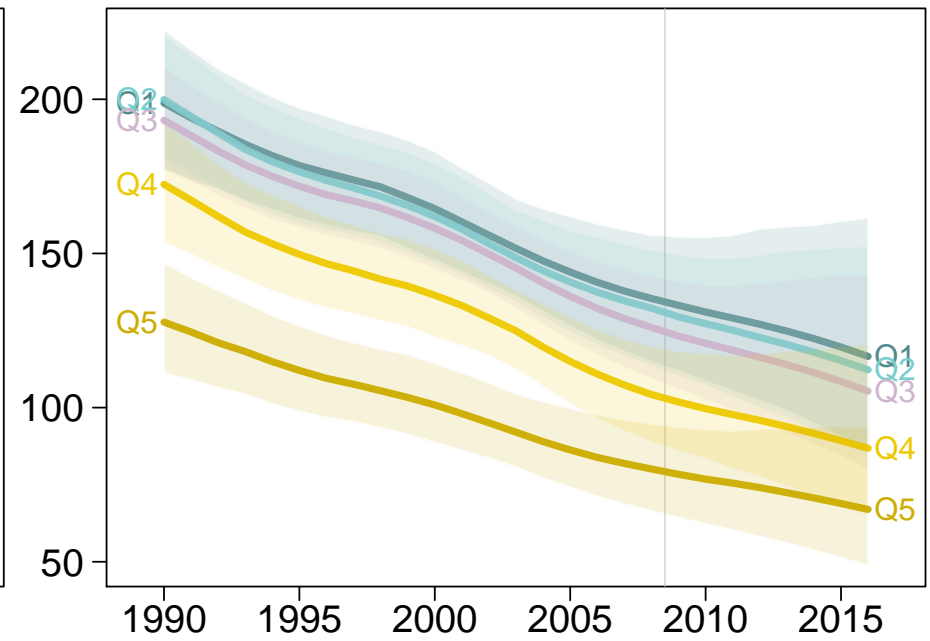

### Bhutan

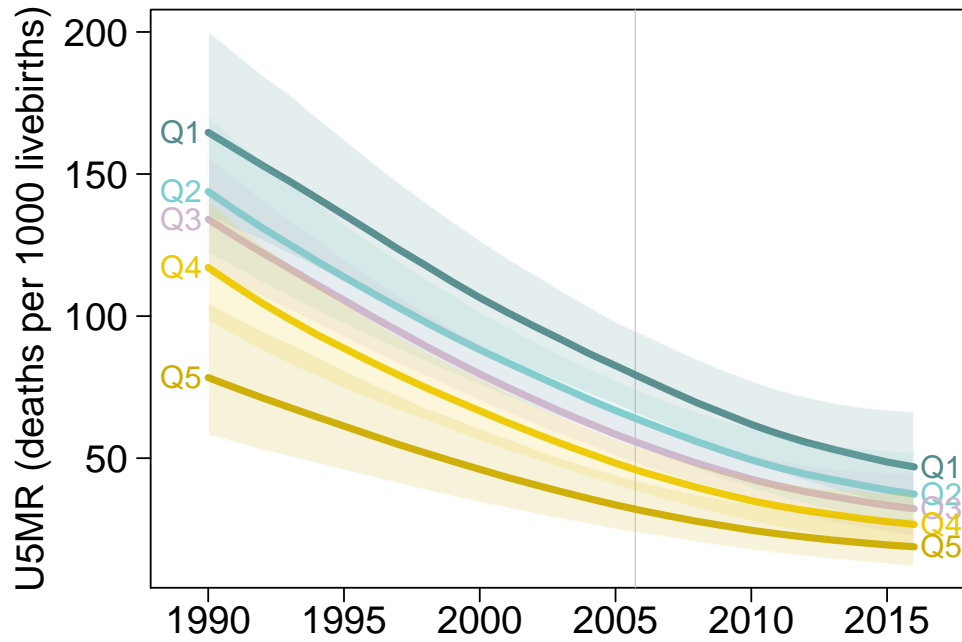

### Bolivia (Plurinational State of)

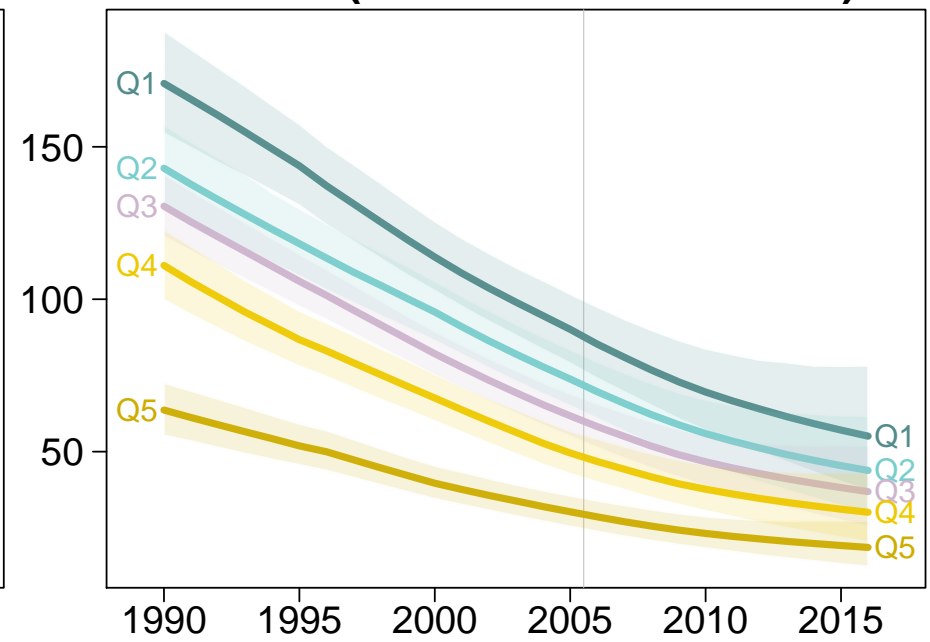



### Brazil

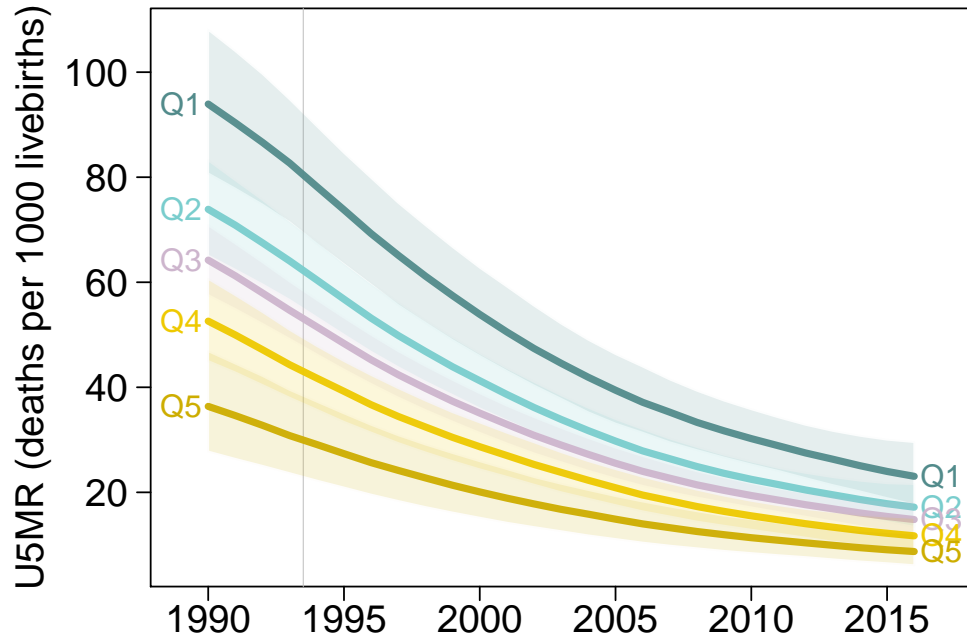

### Burkina Faso

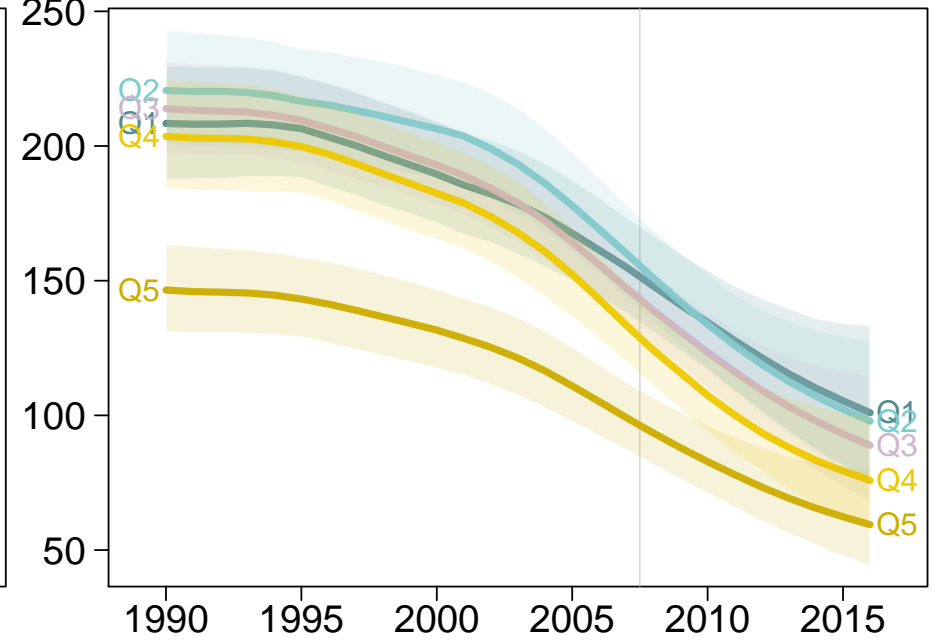

### Burundi

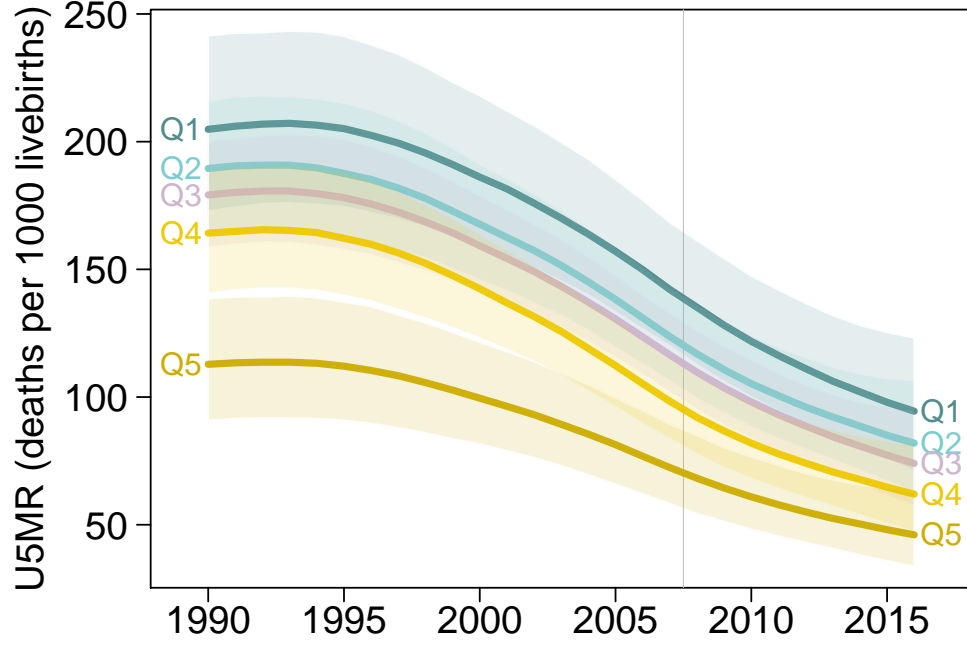

### Cambodia

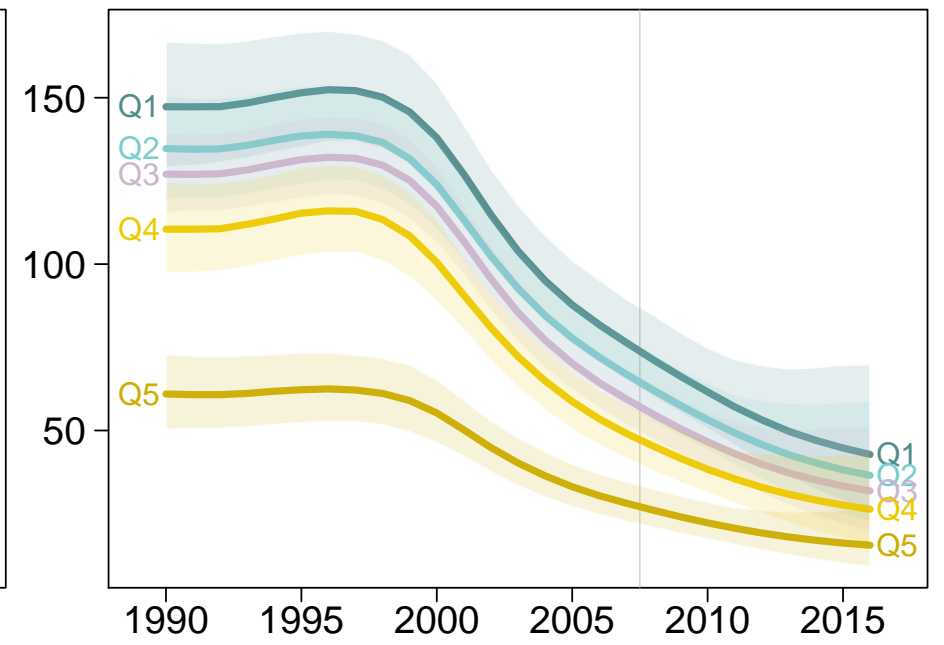

### Cameroon

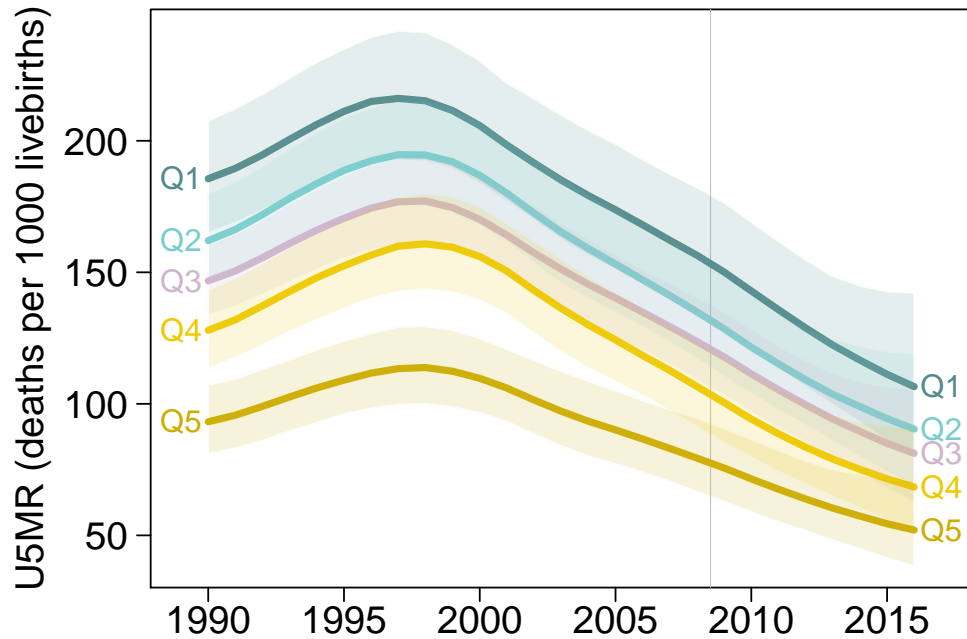

### Central African Republic

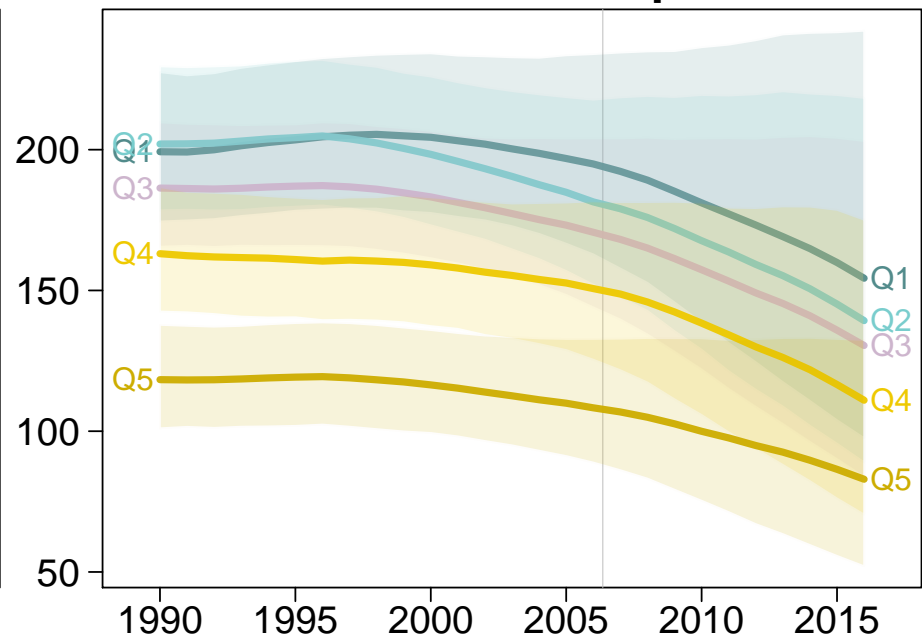

### Chad

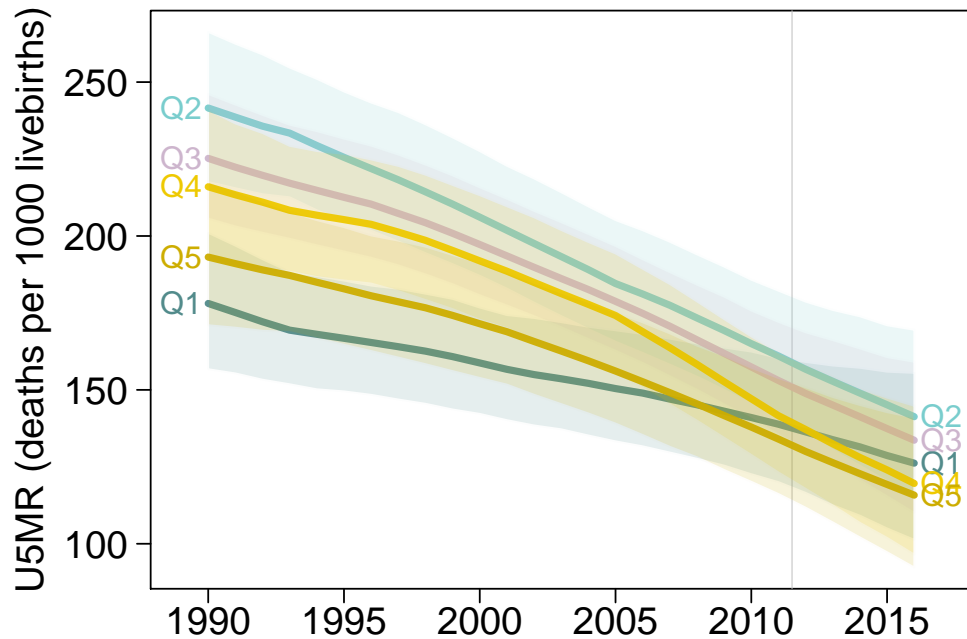

### Colombia

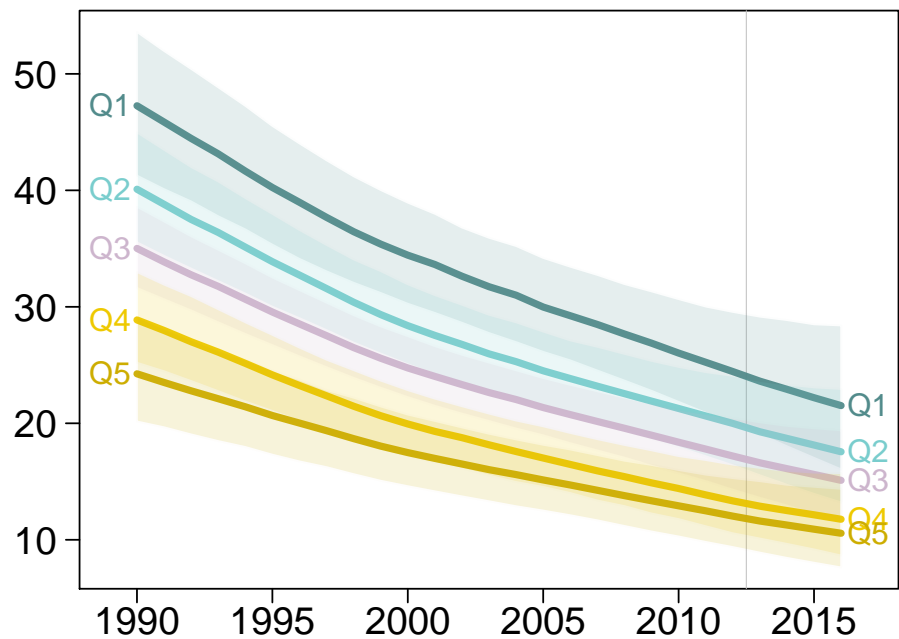

### Comoros

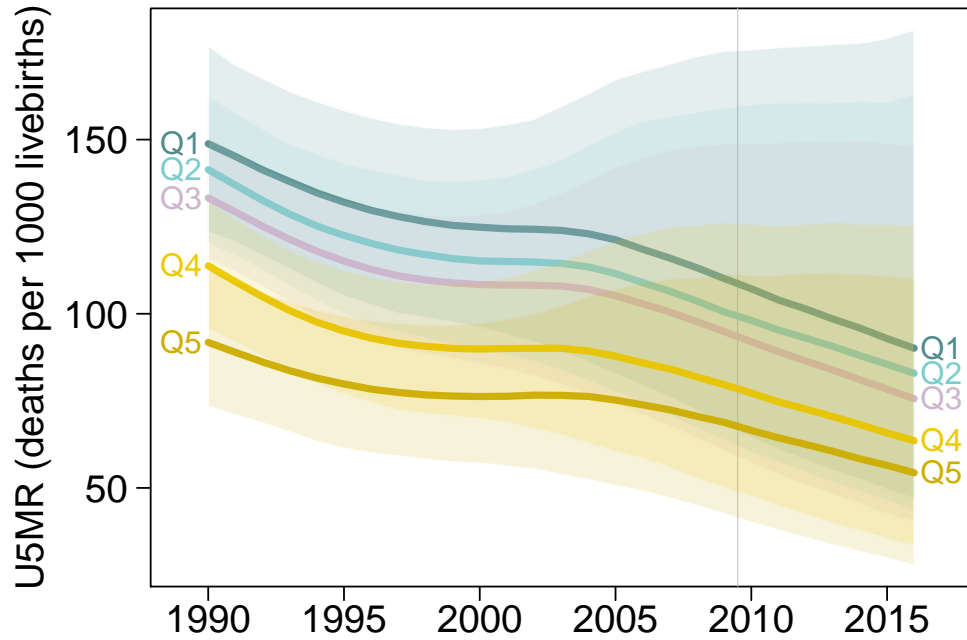

### Congo

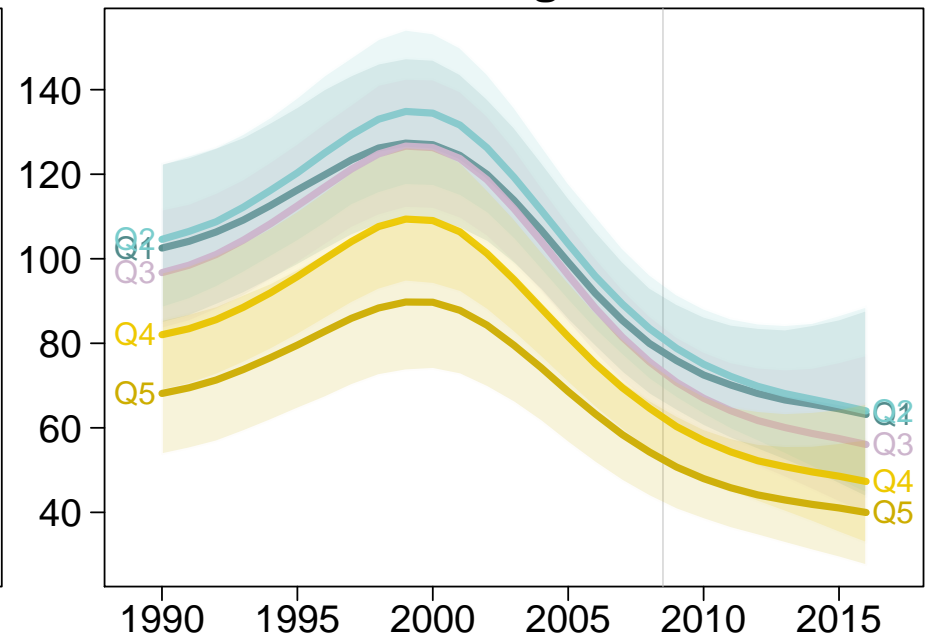

### Cote d'Ivoire

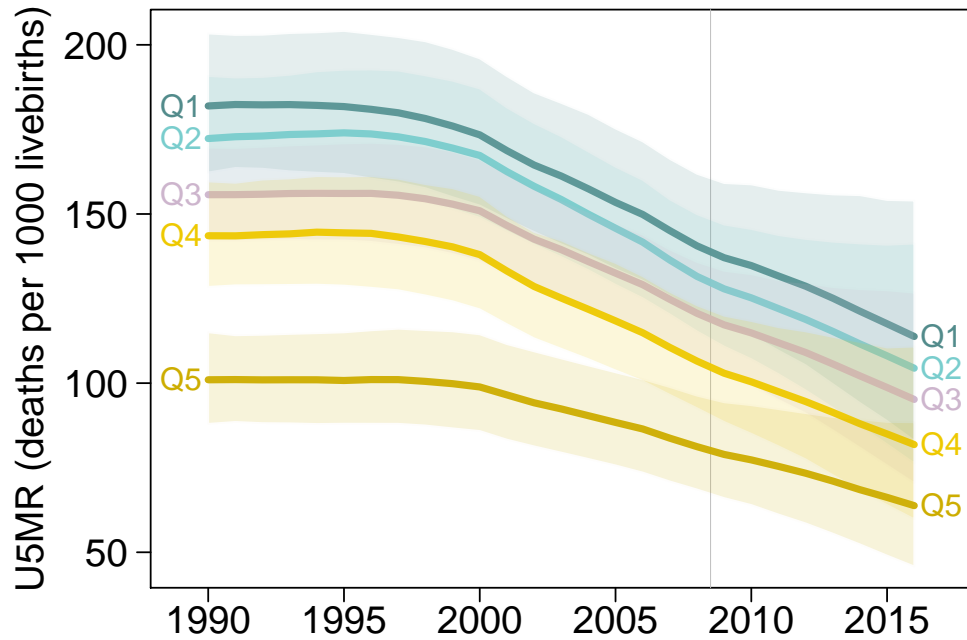

### Democratic Republic of the Congo

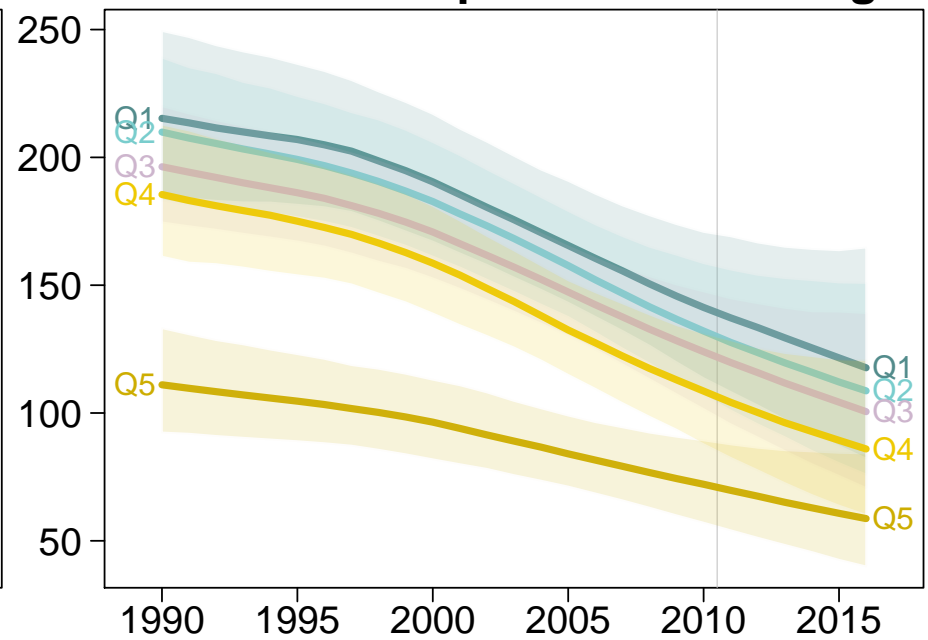

### Dominican Republic

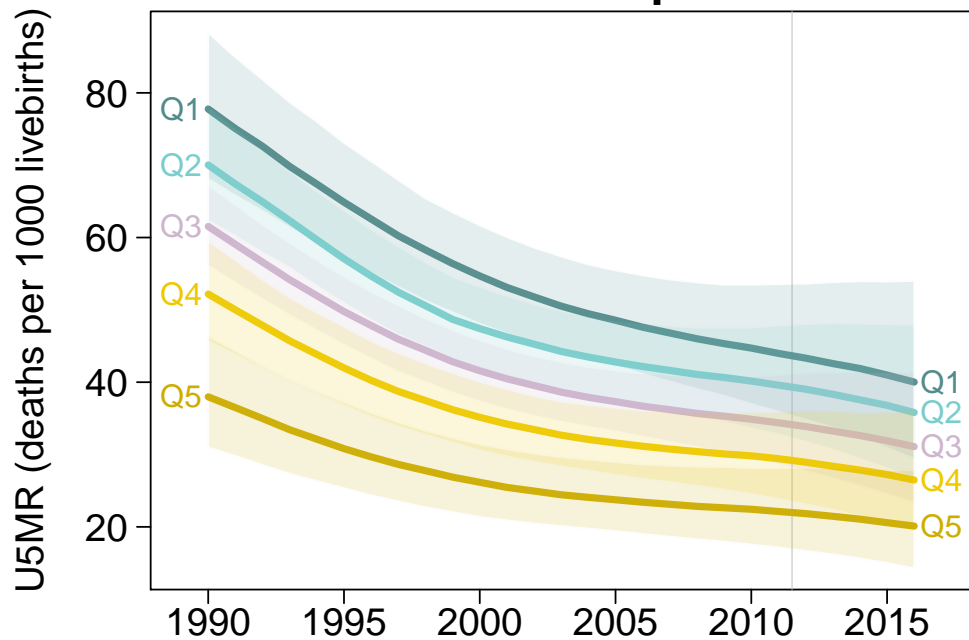

### Egypt

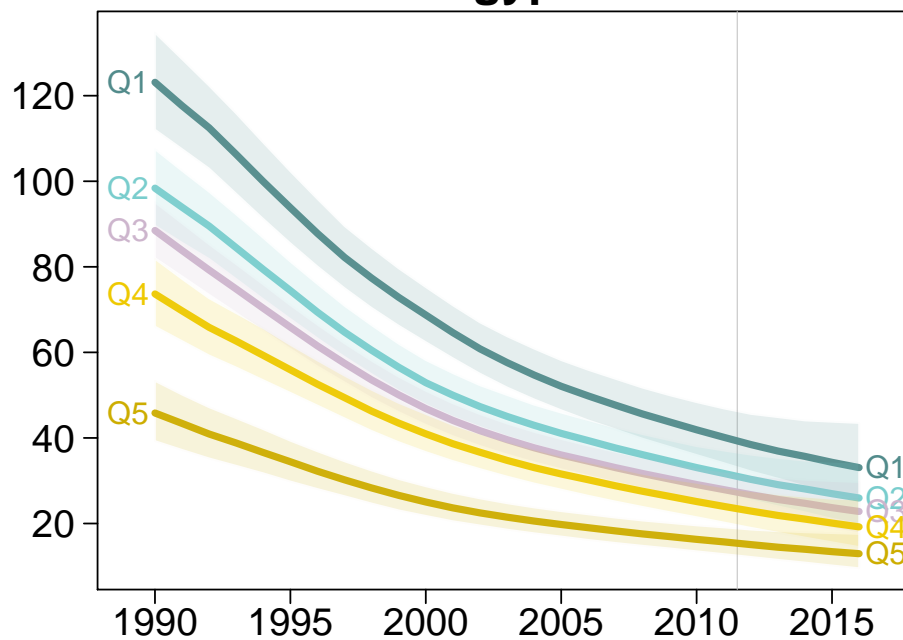

### El Salvador

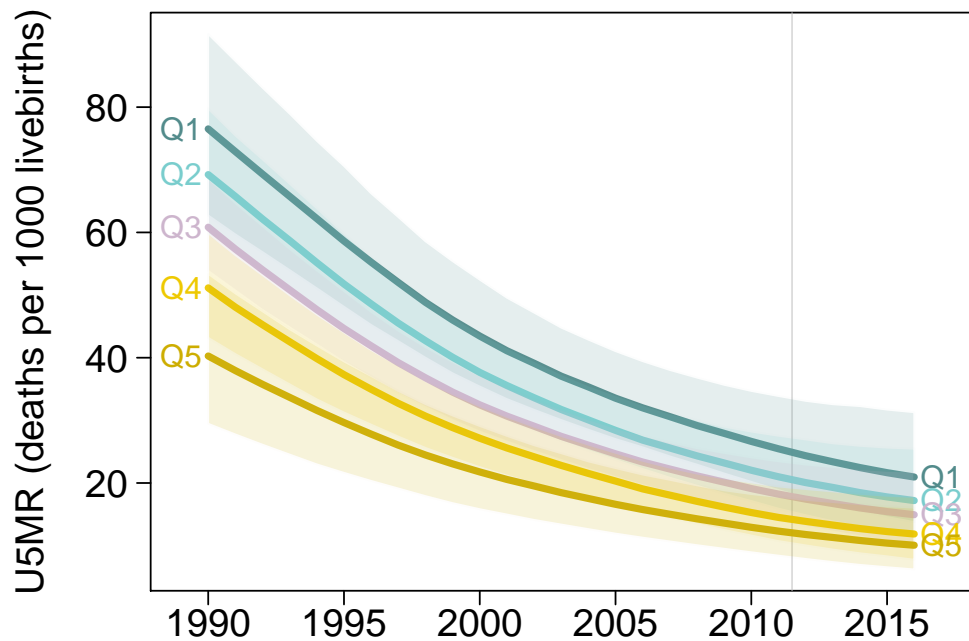

### Equatorial Guinea

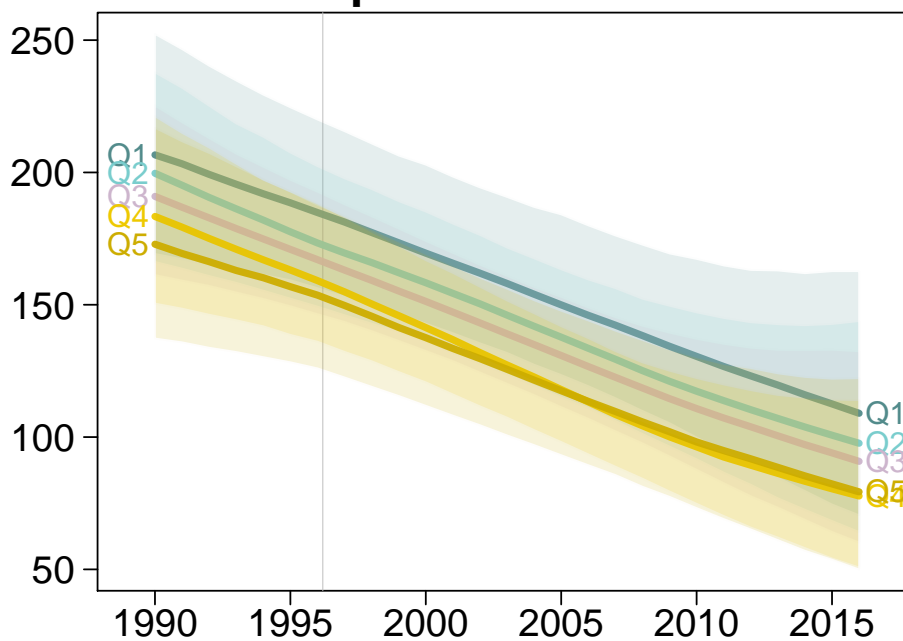

### Eritrea

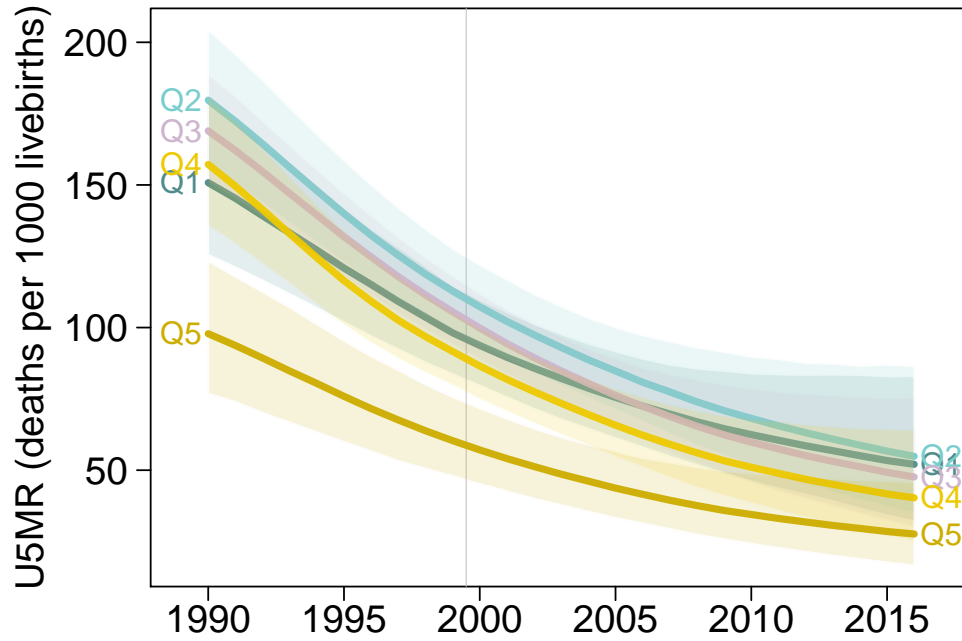

### Ethiopia

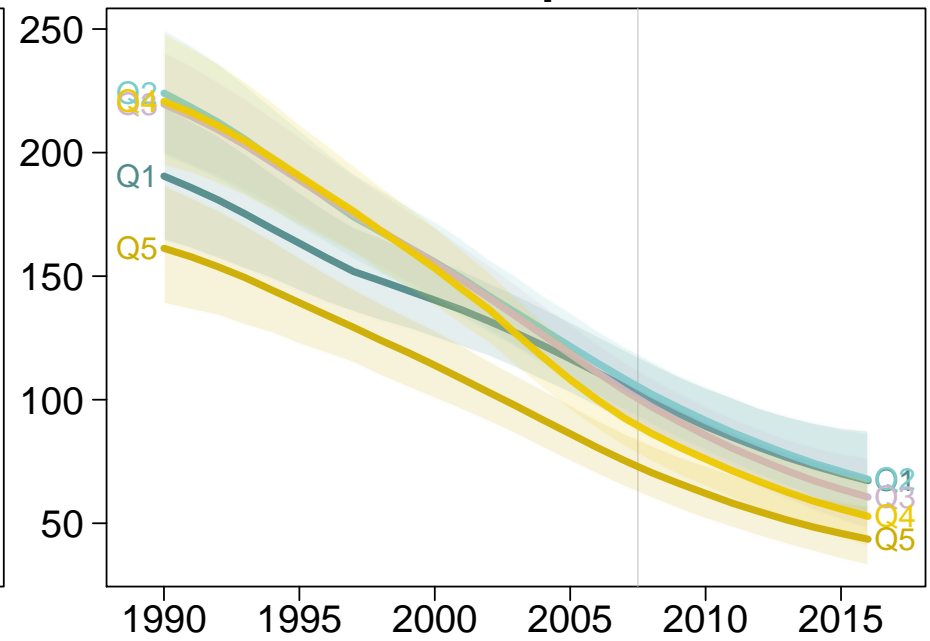

### Gabon

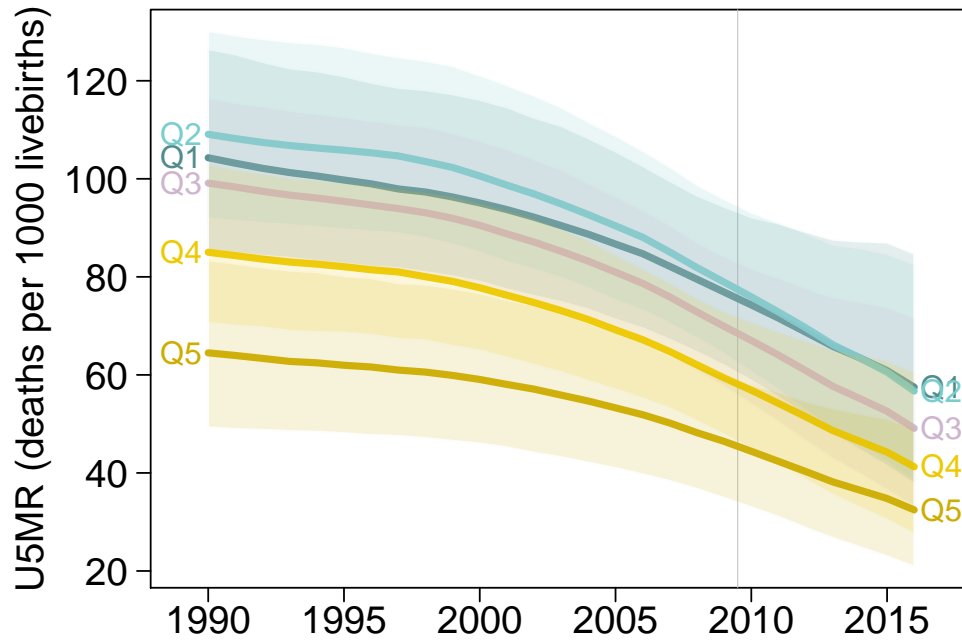

### Georgia

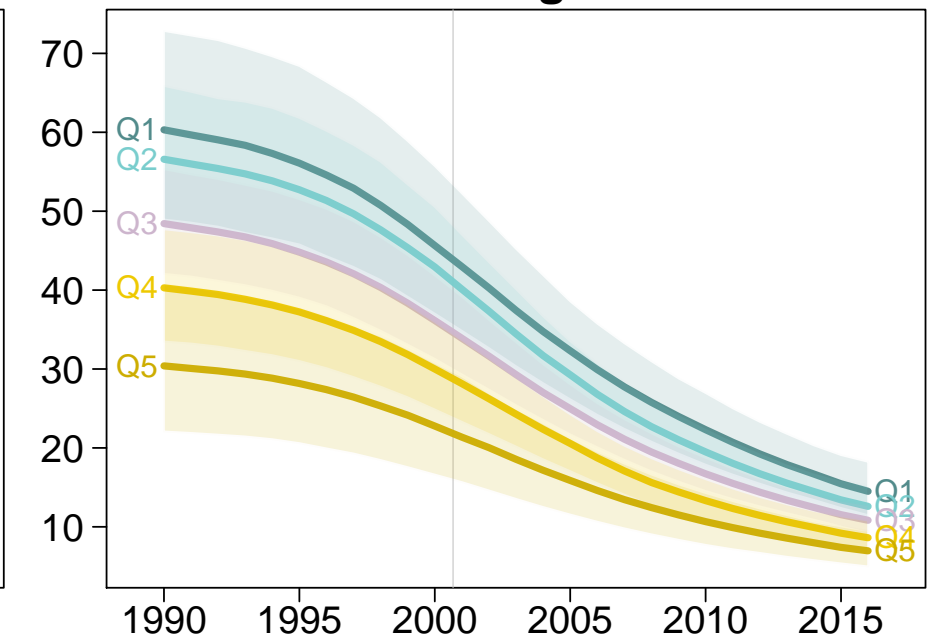

### Ghana

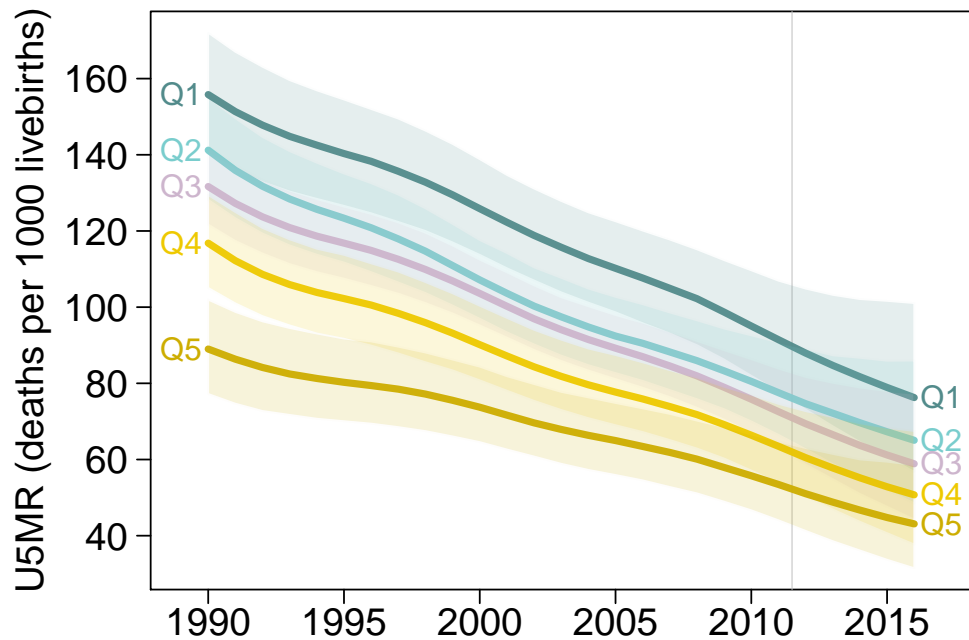

### Guatemala

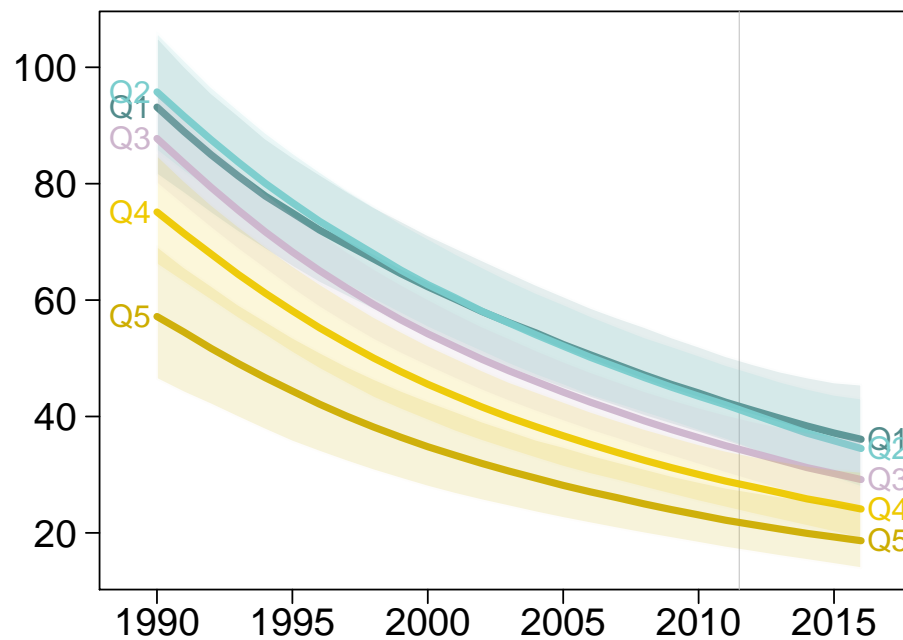

### Guinea

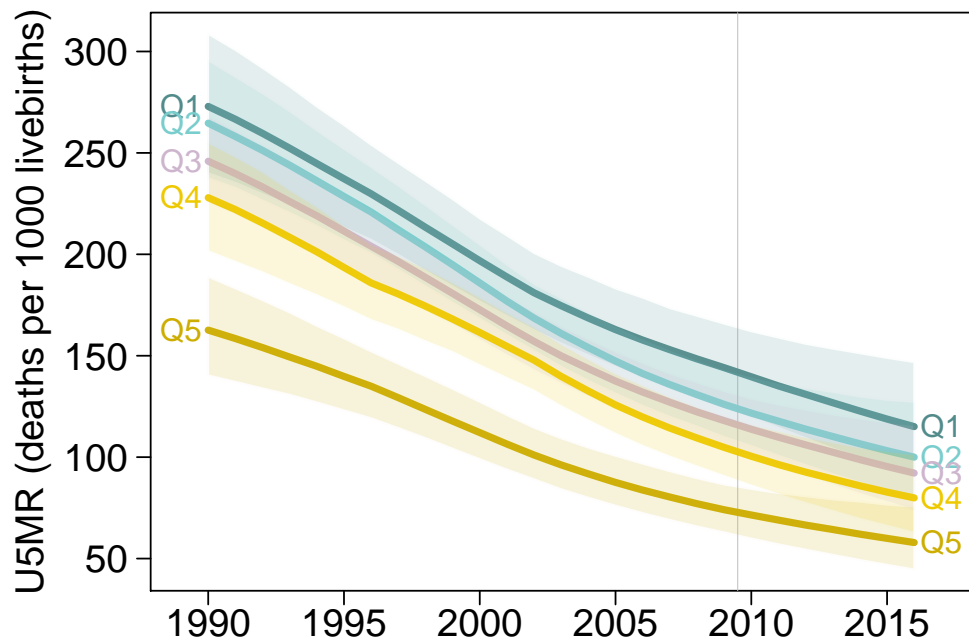

### Guinea-Bissau

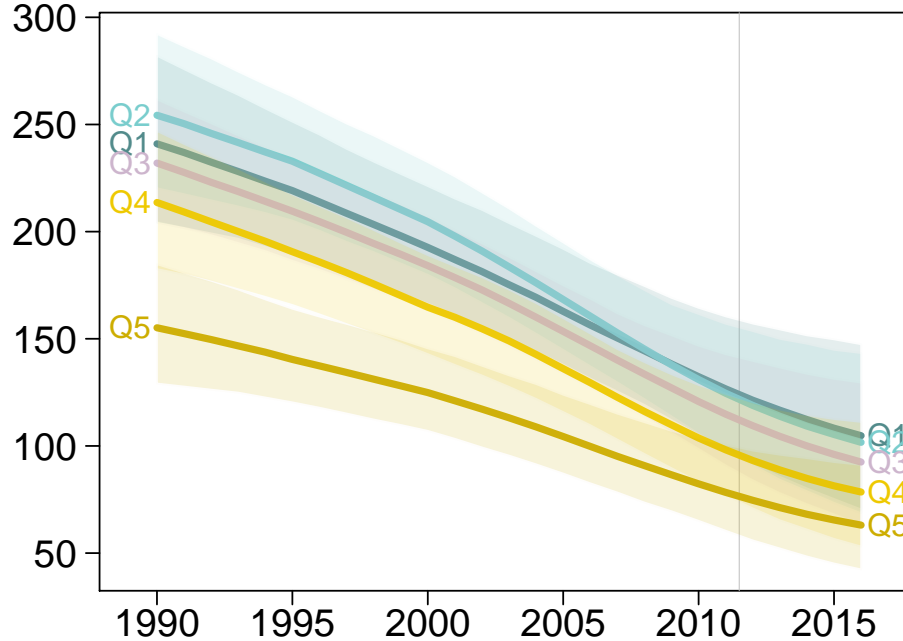

### Guyana

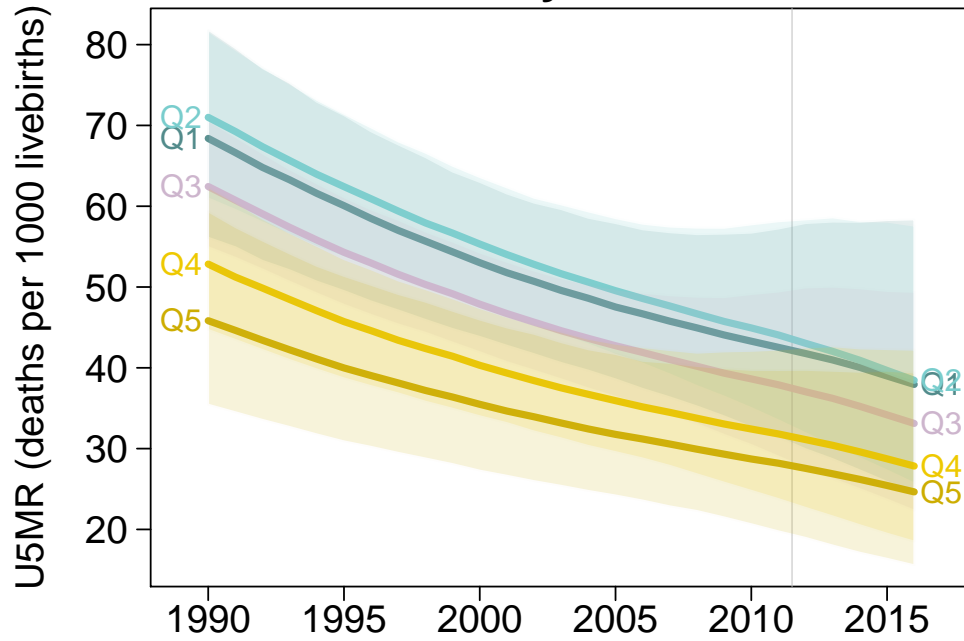

### Haiti

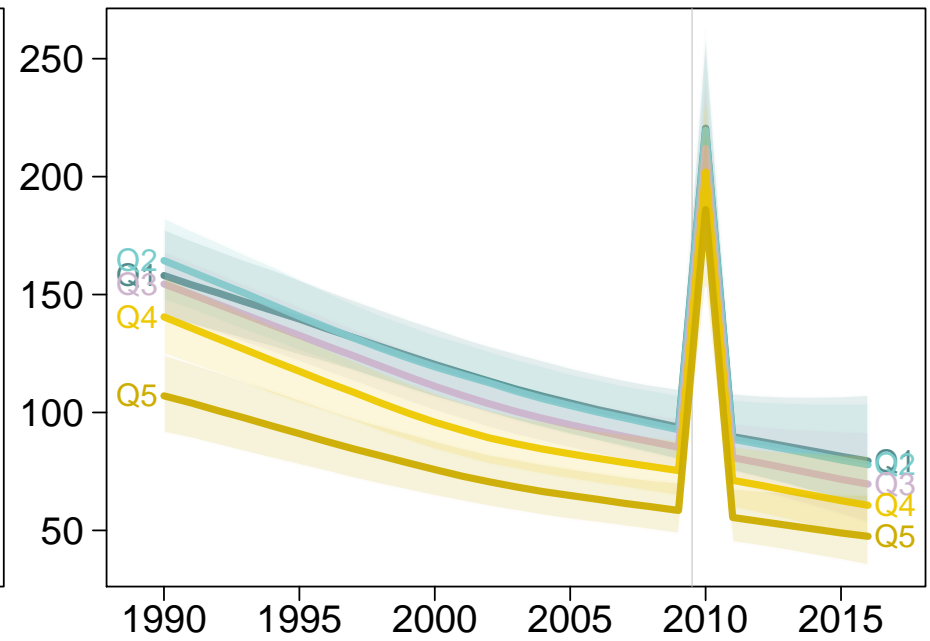

### Honduras

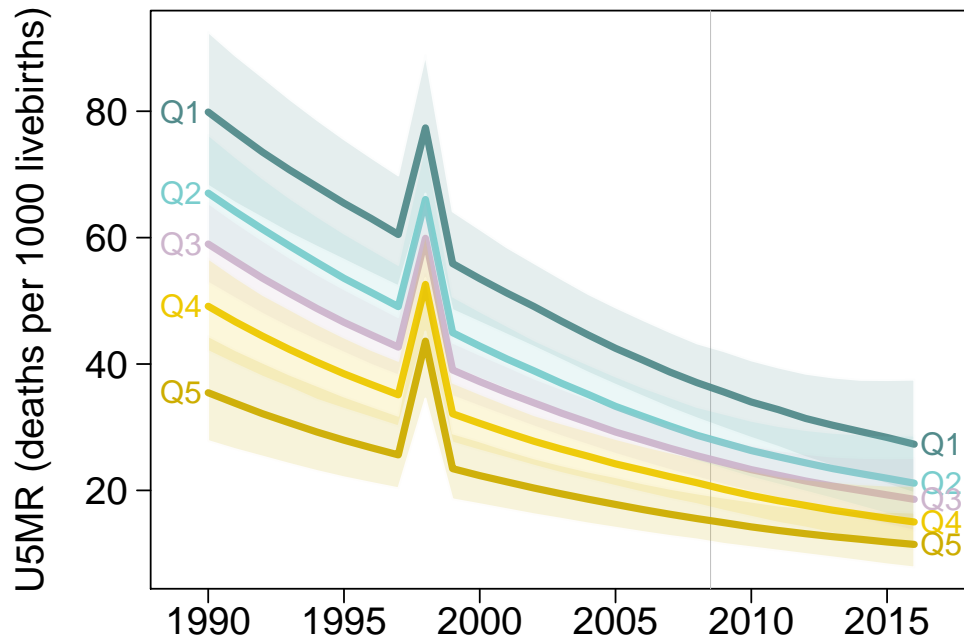

### India

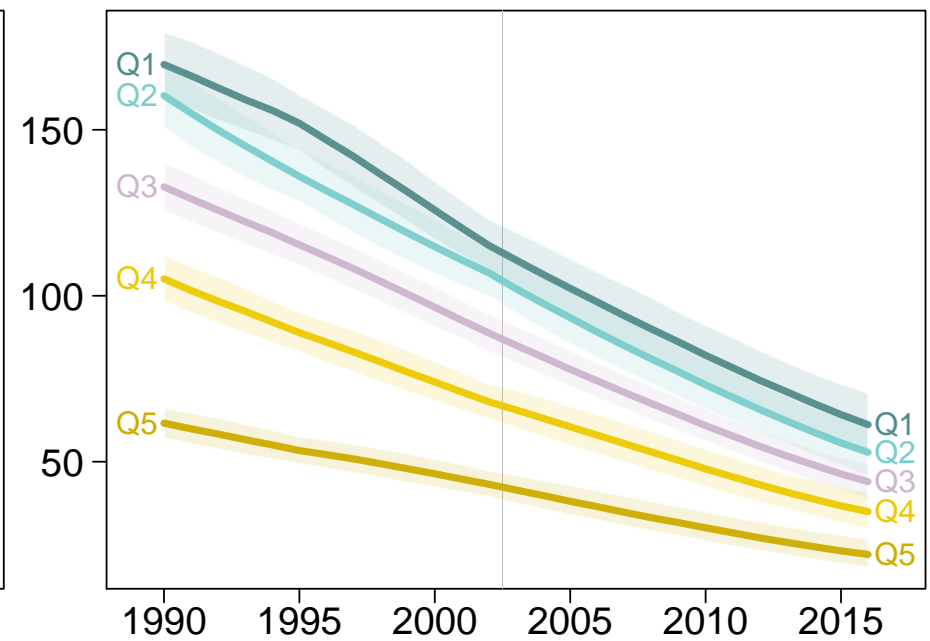

### Indonesia

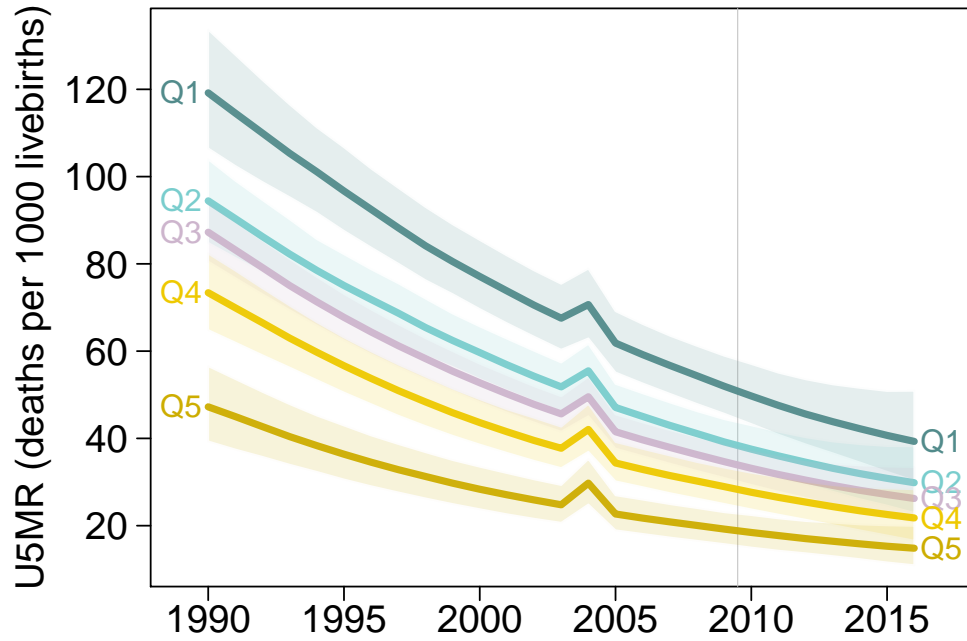

### Iraq

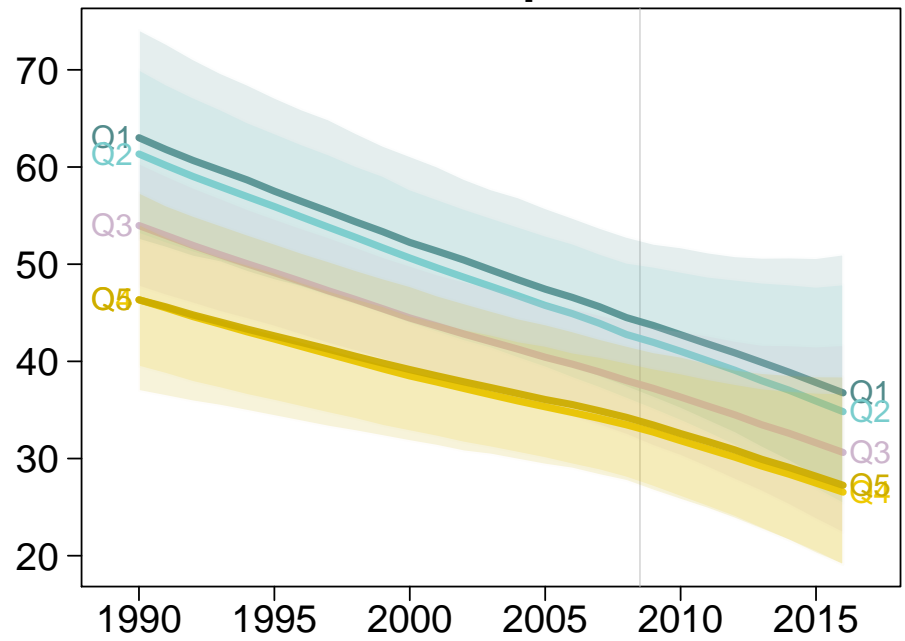

### Jordan

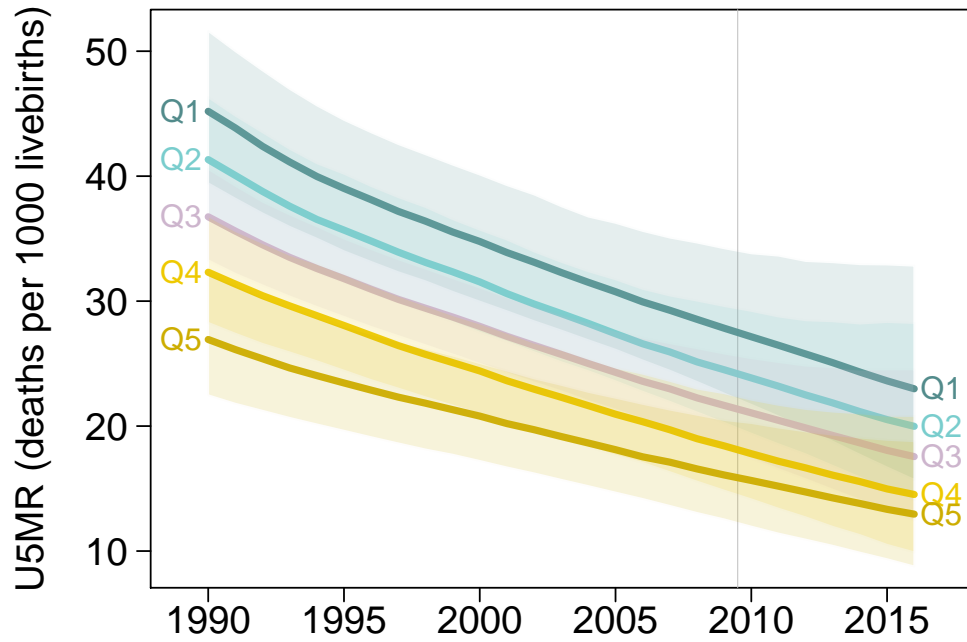

### Kazakhstan

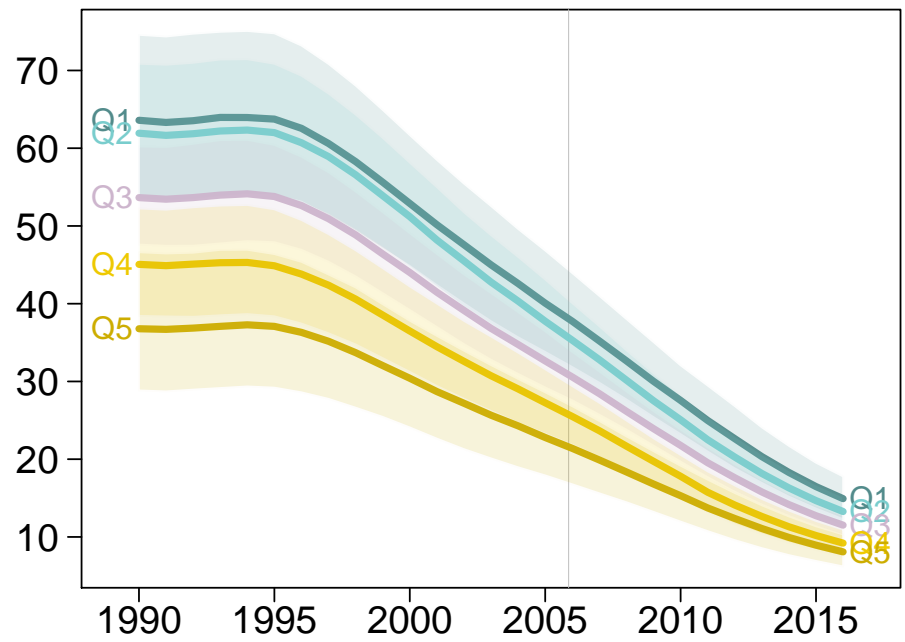



### Kenya

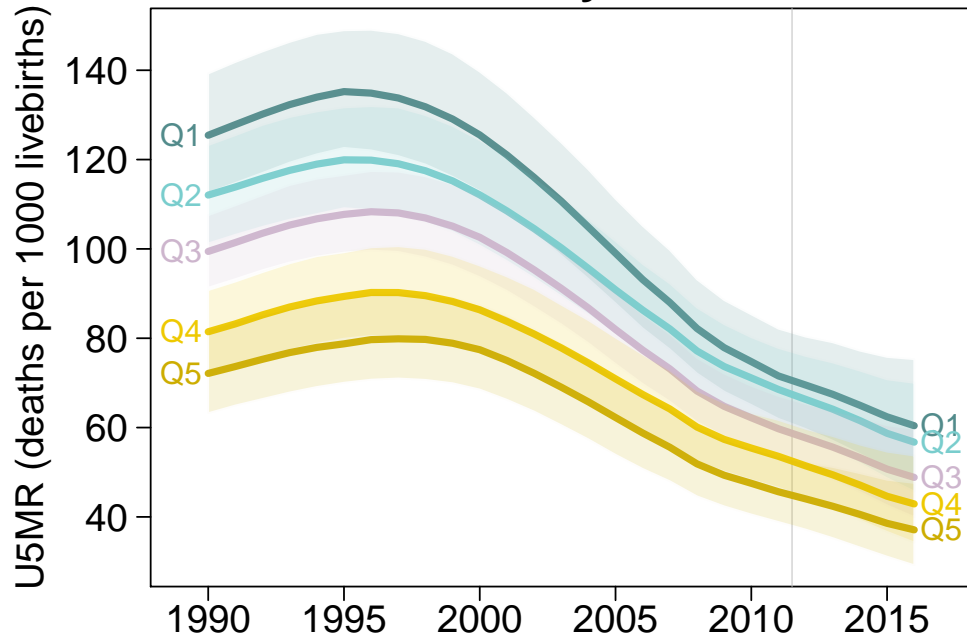

### Kyrgyzstan

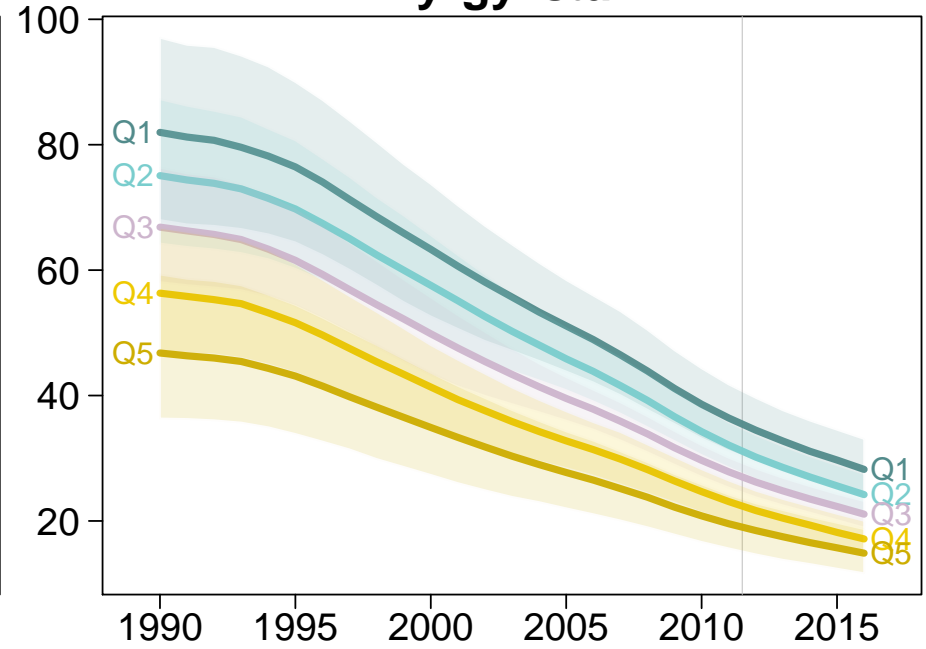

### Lao People's Democratic Republic

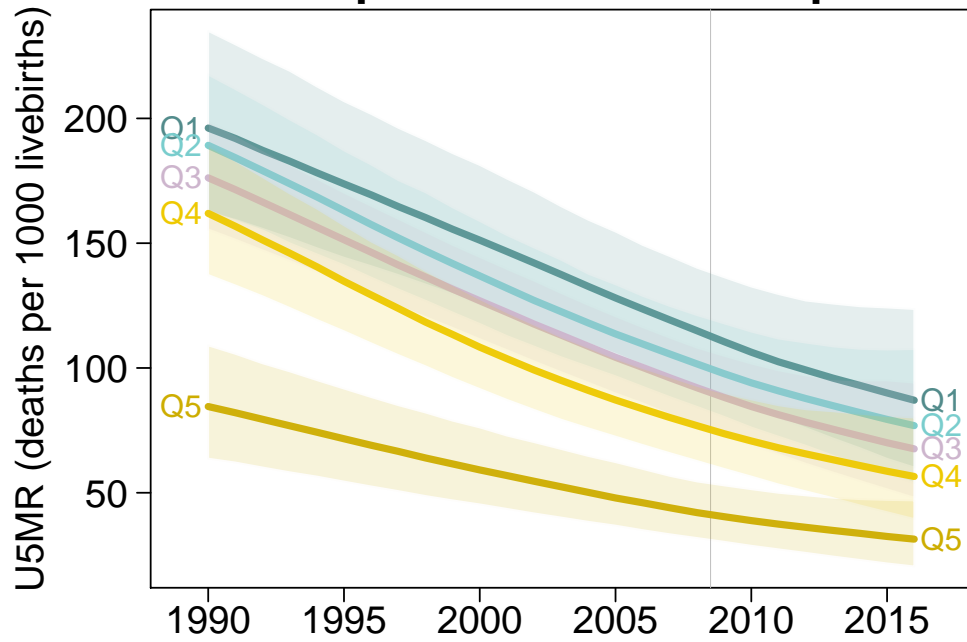

### Lesotho

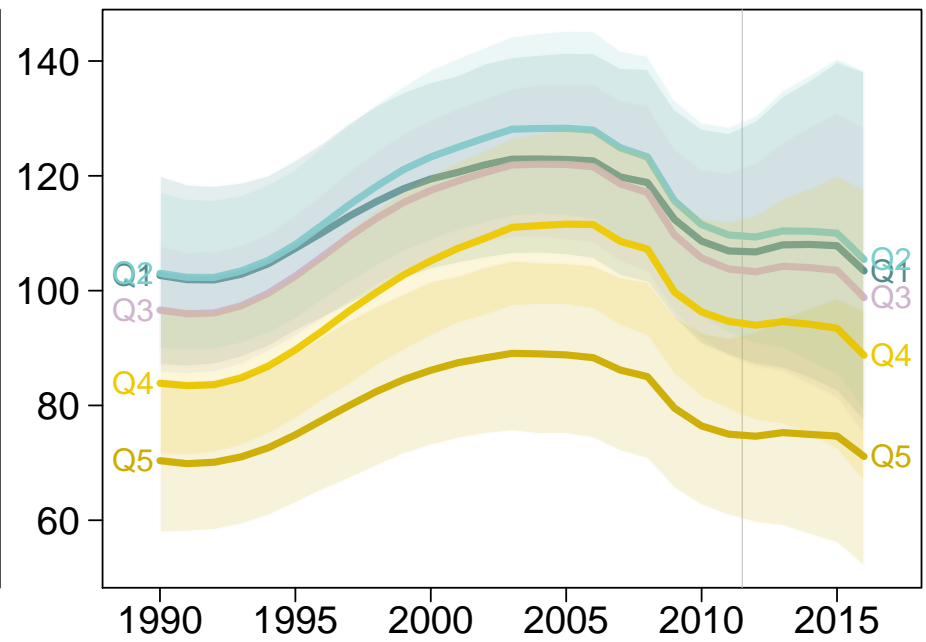

### Liberia

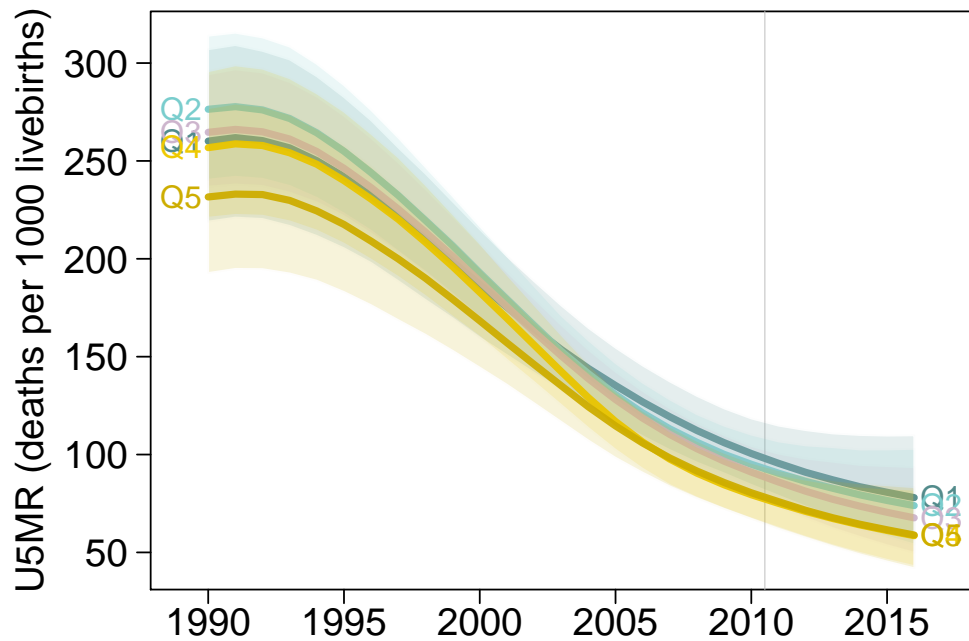

### Madagascar

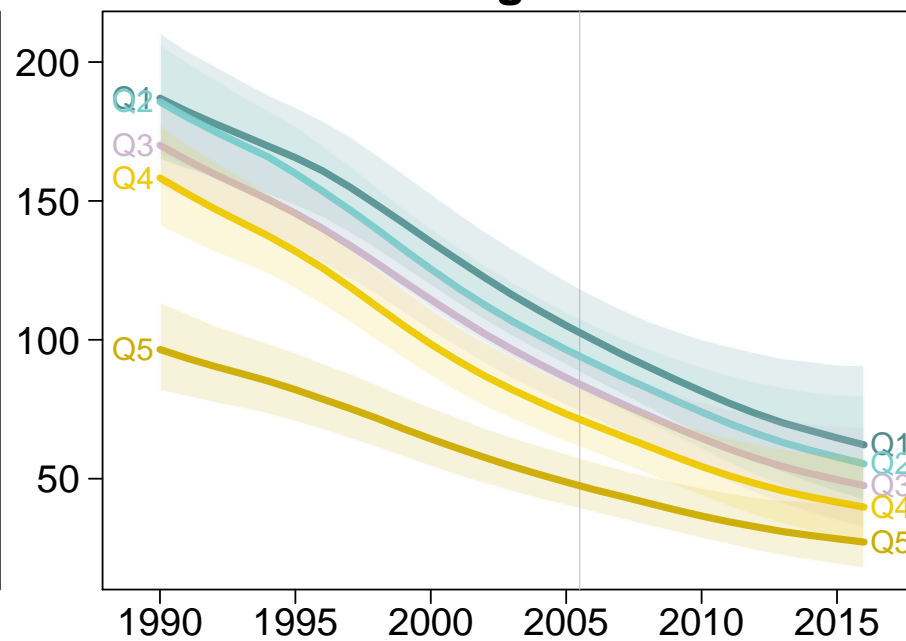

### Malawi

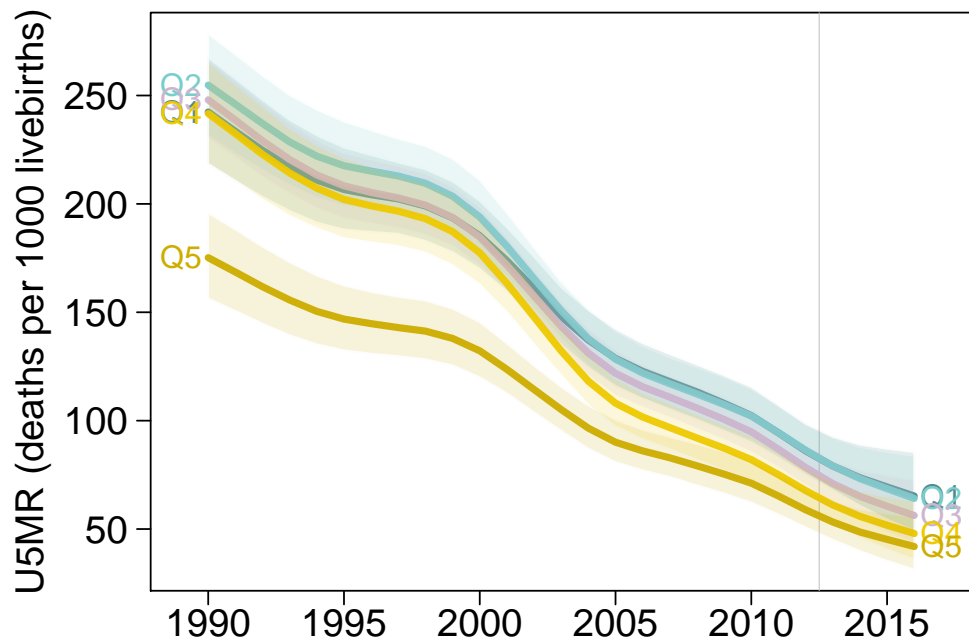

### Maldives

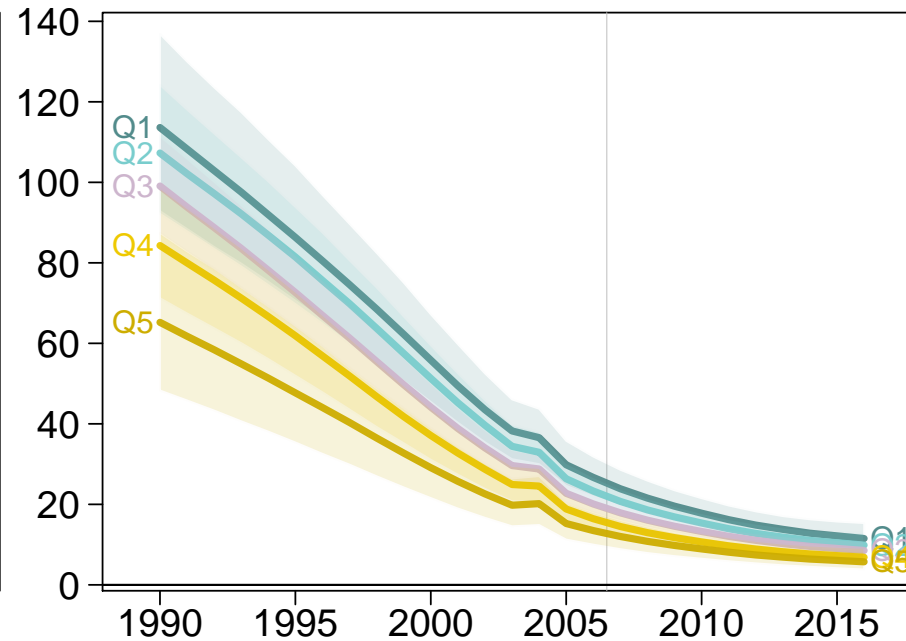

### Mali

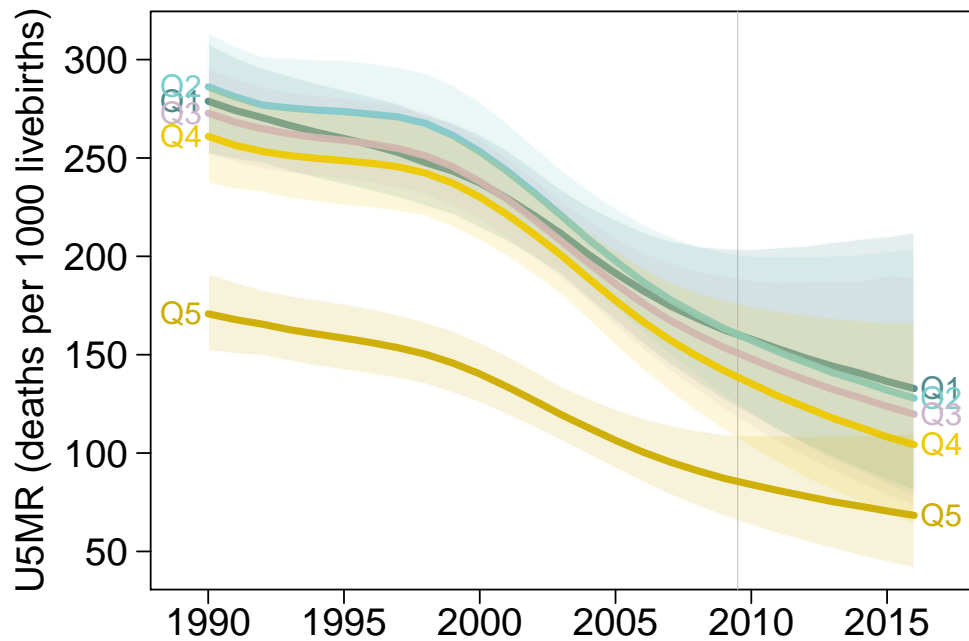

### Mauritania

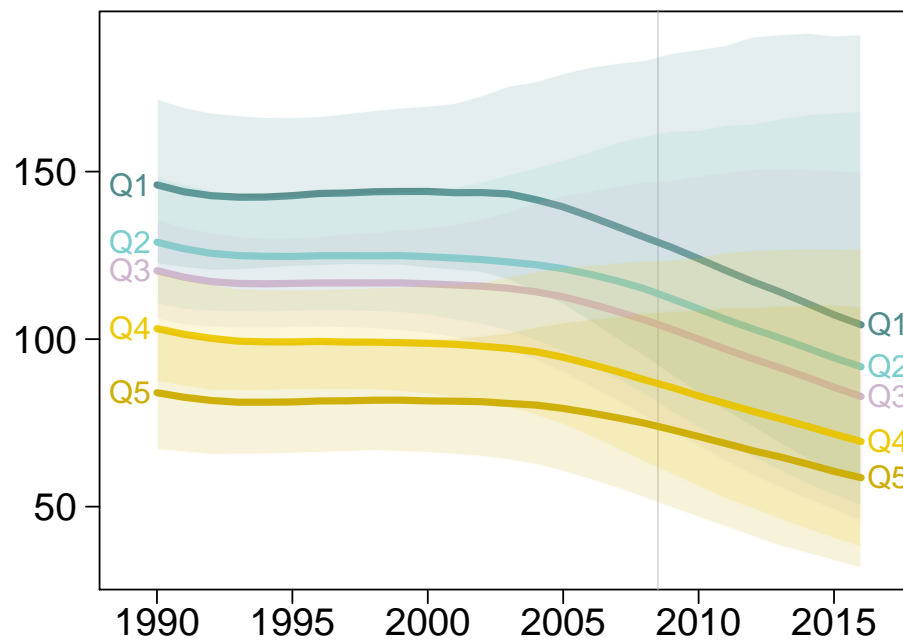

### Mongolia

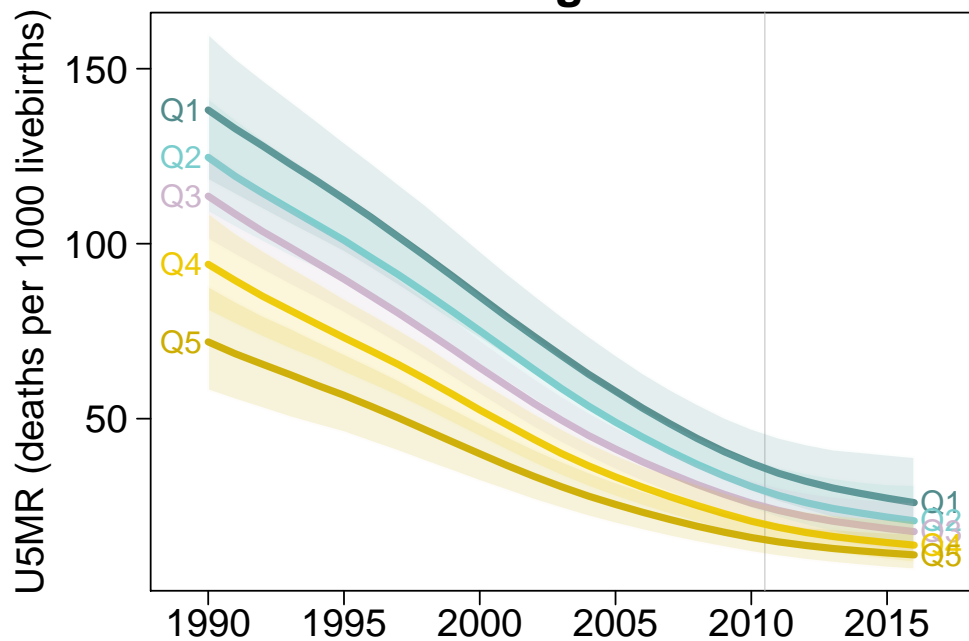

### Morocco

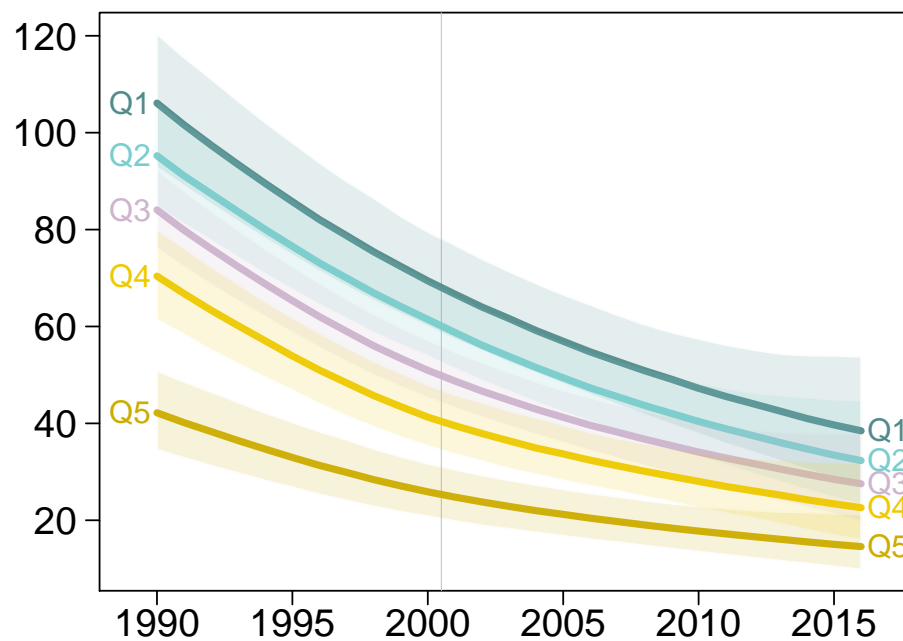

### Mozambique

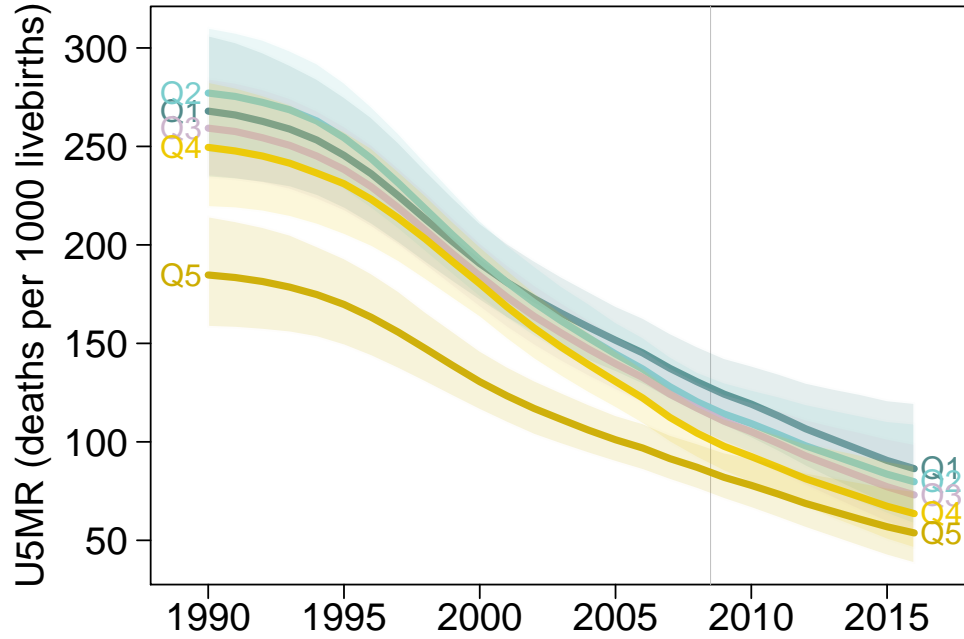

### Myanmar

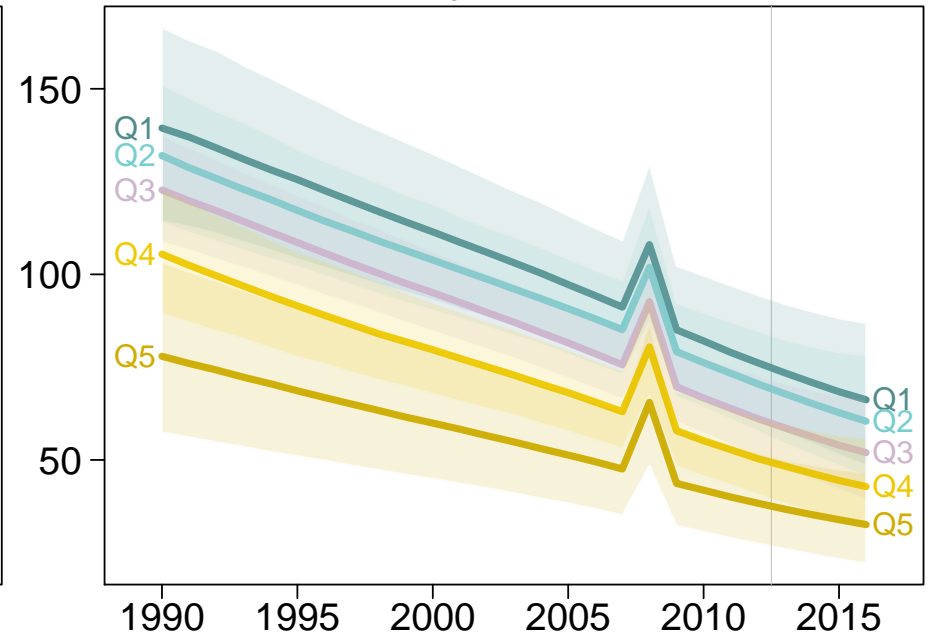

### Namibia

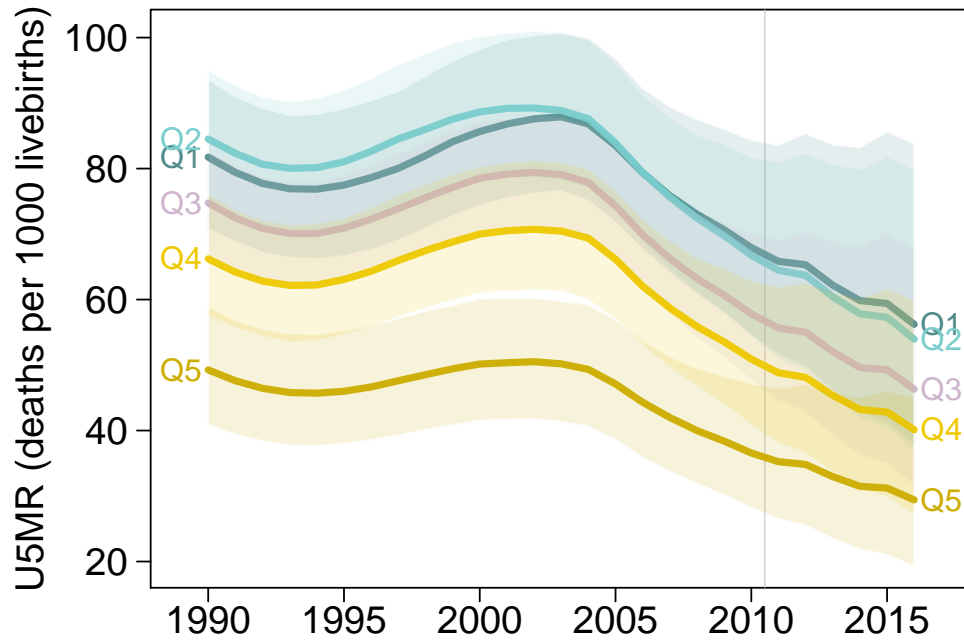

### Nepal

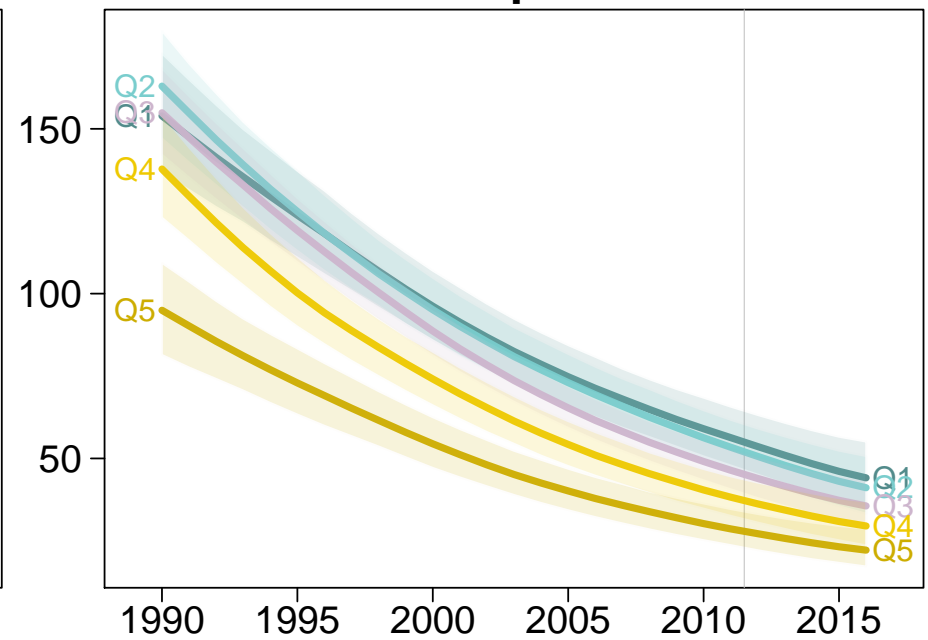

### Nicaragua

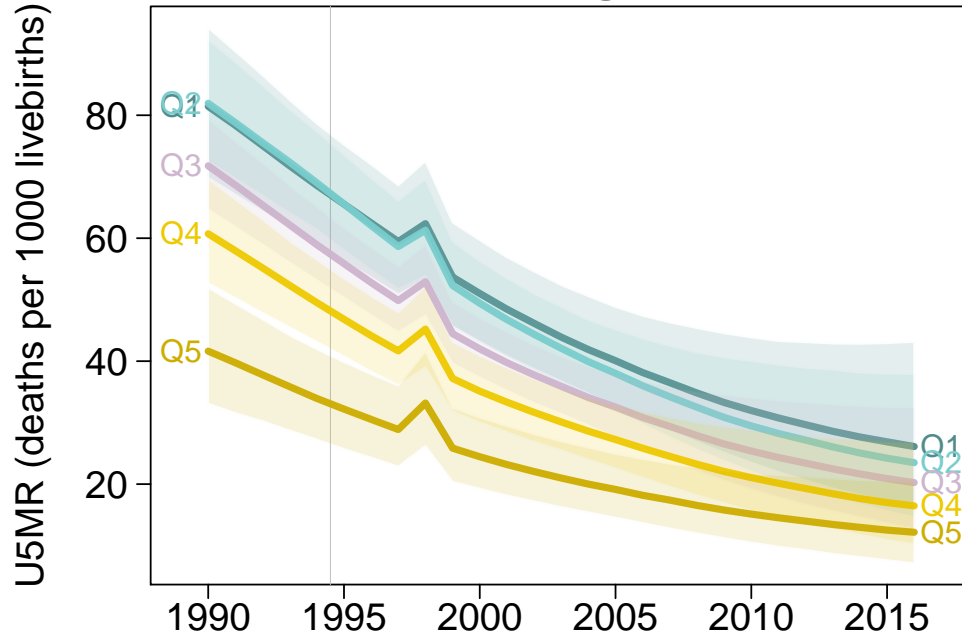

### Niger

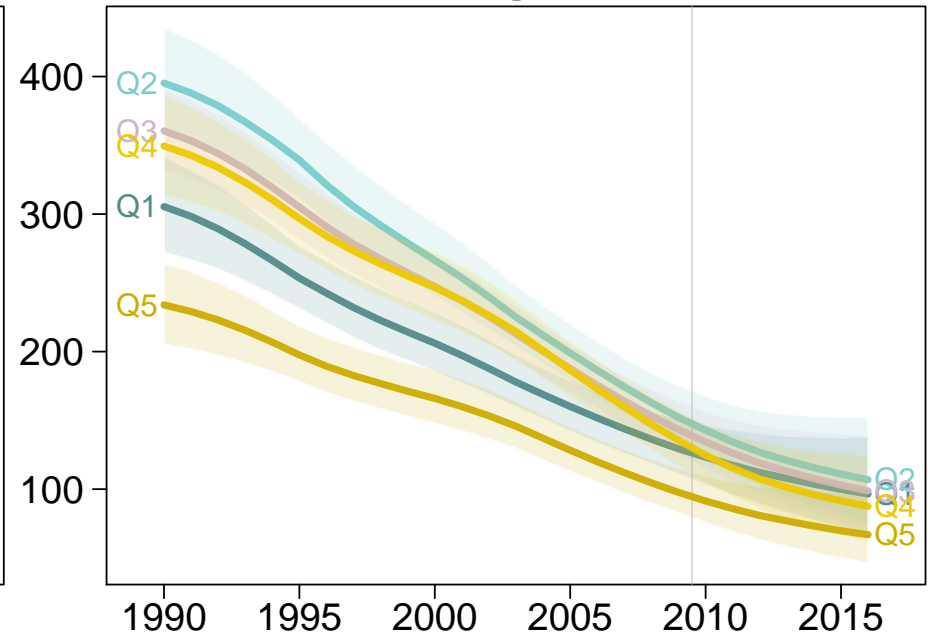

### Nigeria

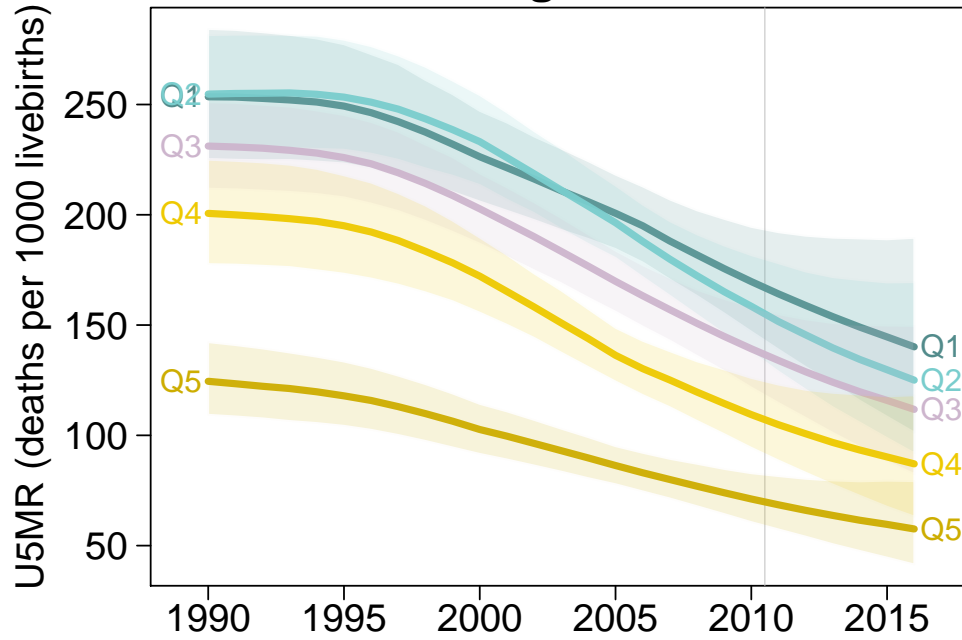

### Pakistan

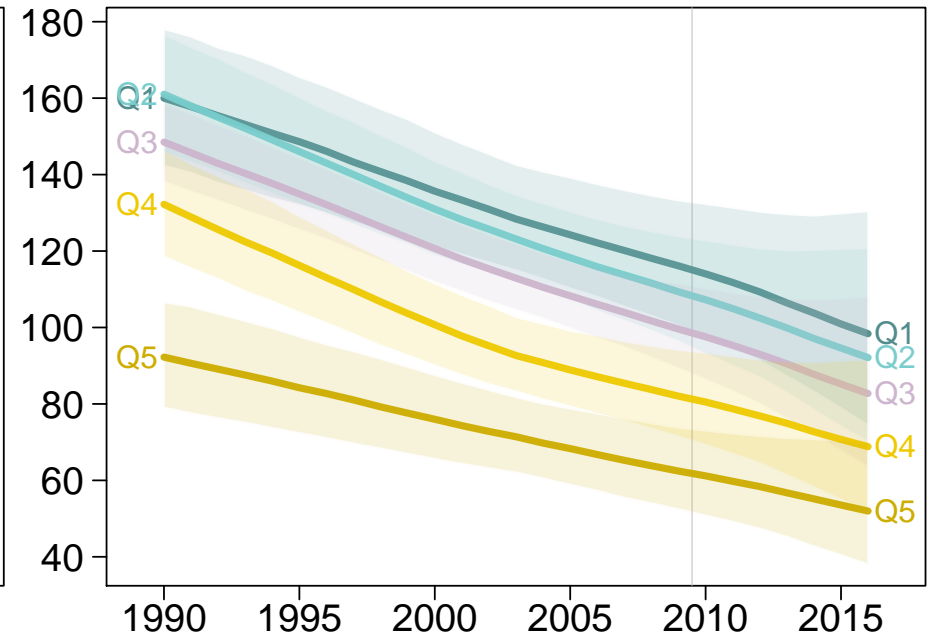

### Paraguay

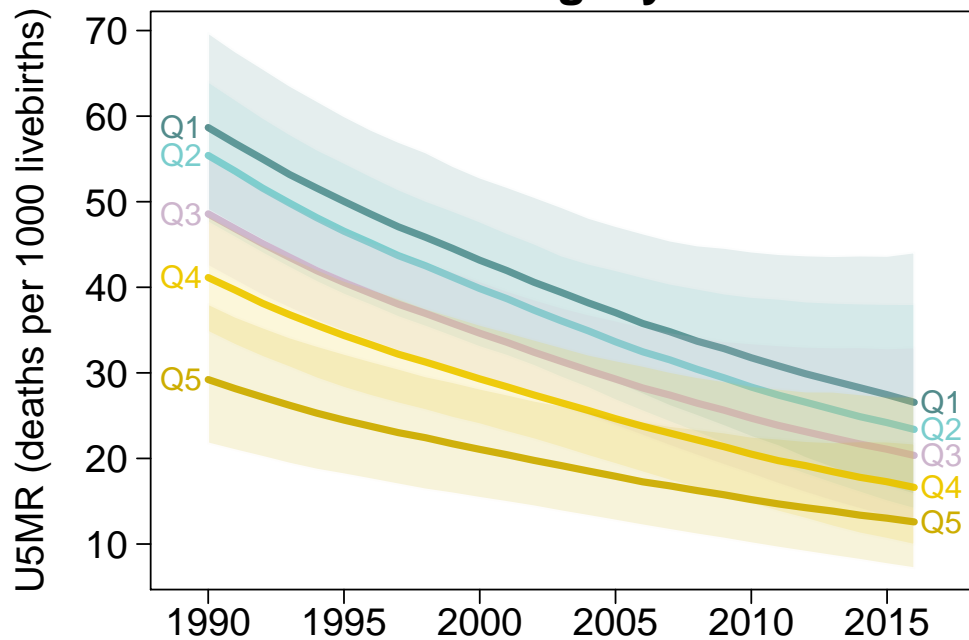

### Peru

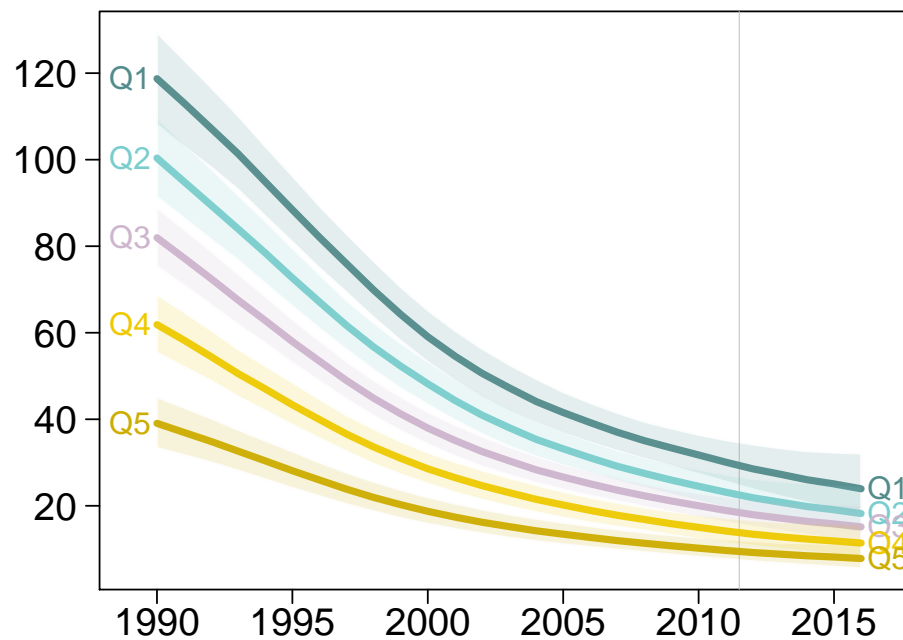

### Philippines

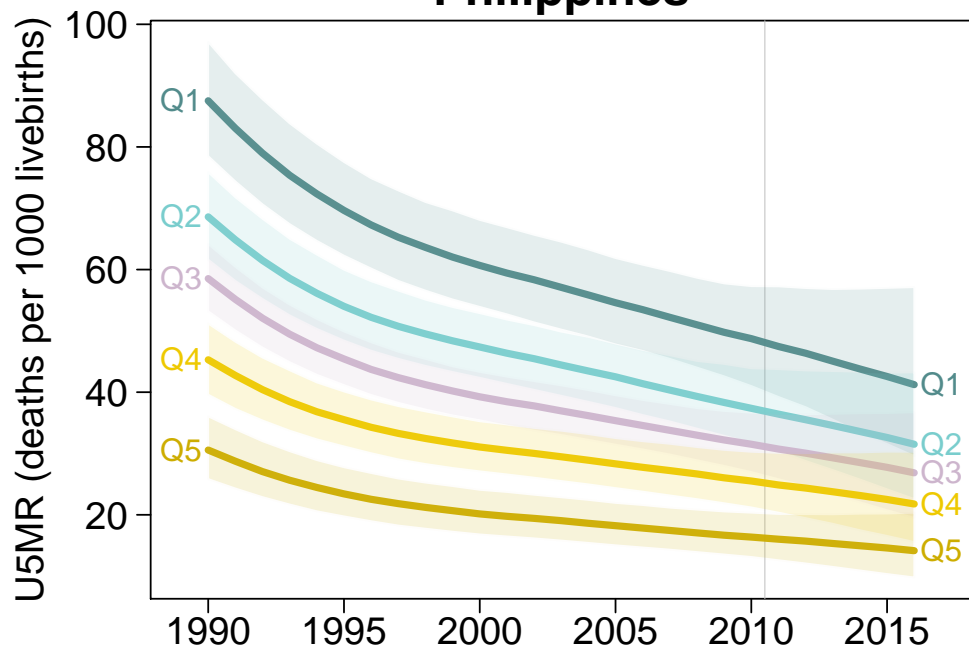

### Republic of Moldova

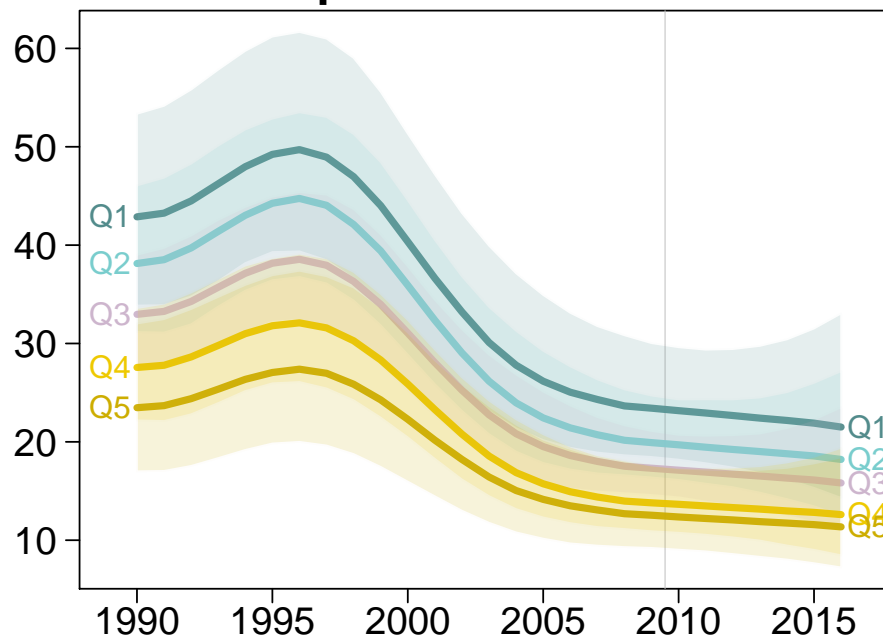

### Rwanda

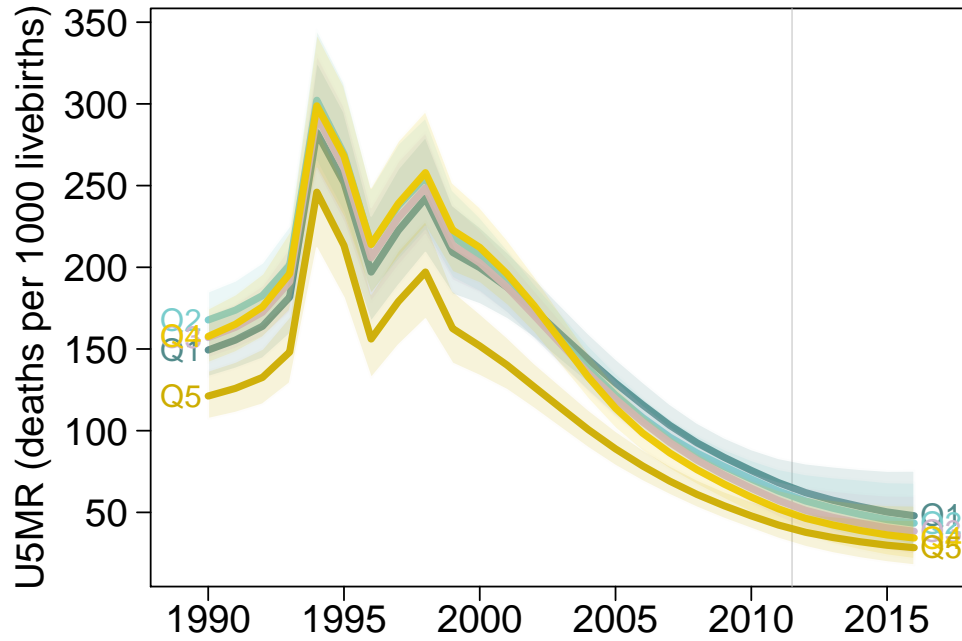

### Sao Tome and Principe

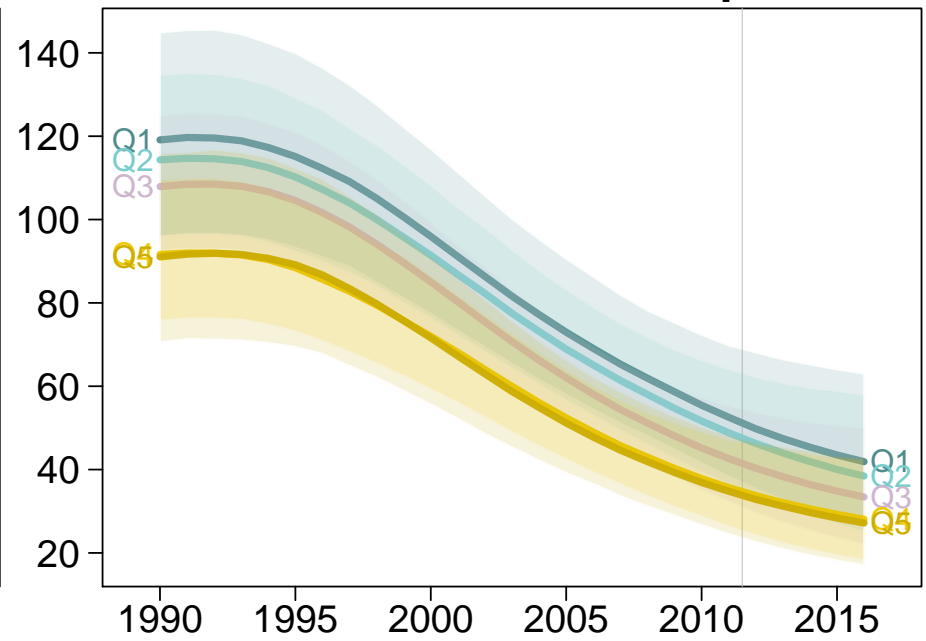

### Senegal

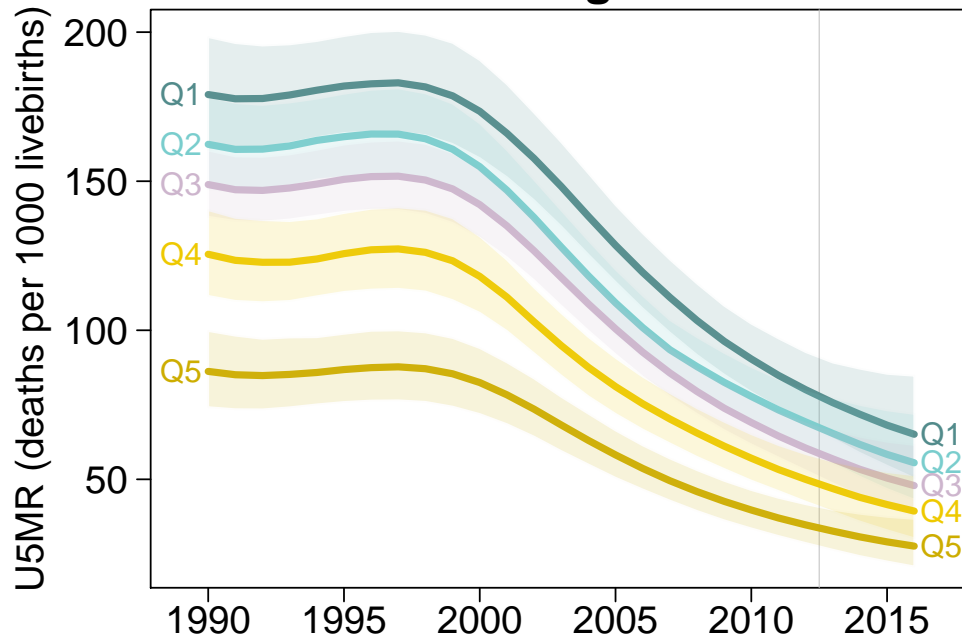

### Serbia

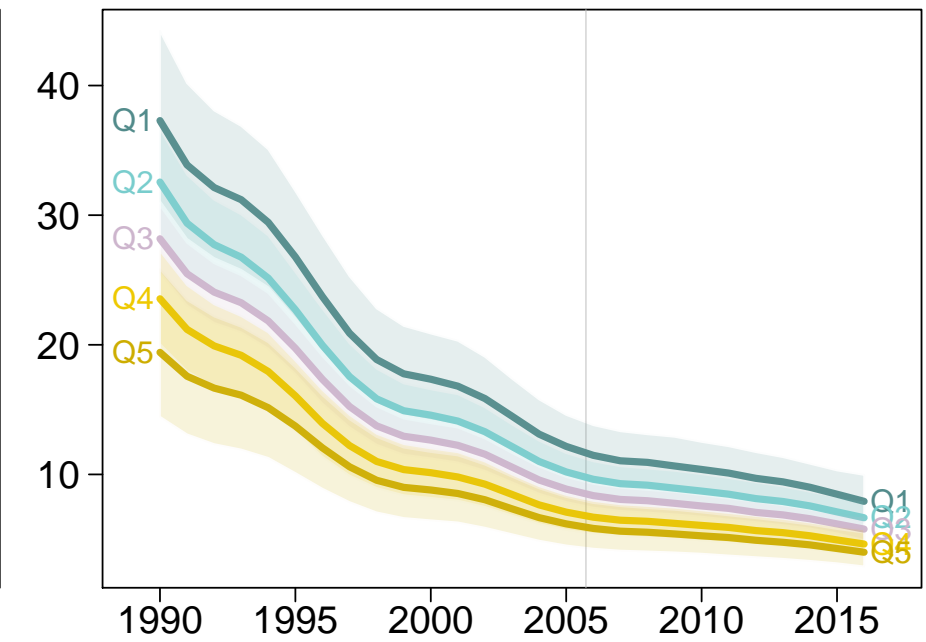

### Sierra Leone

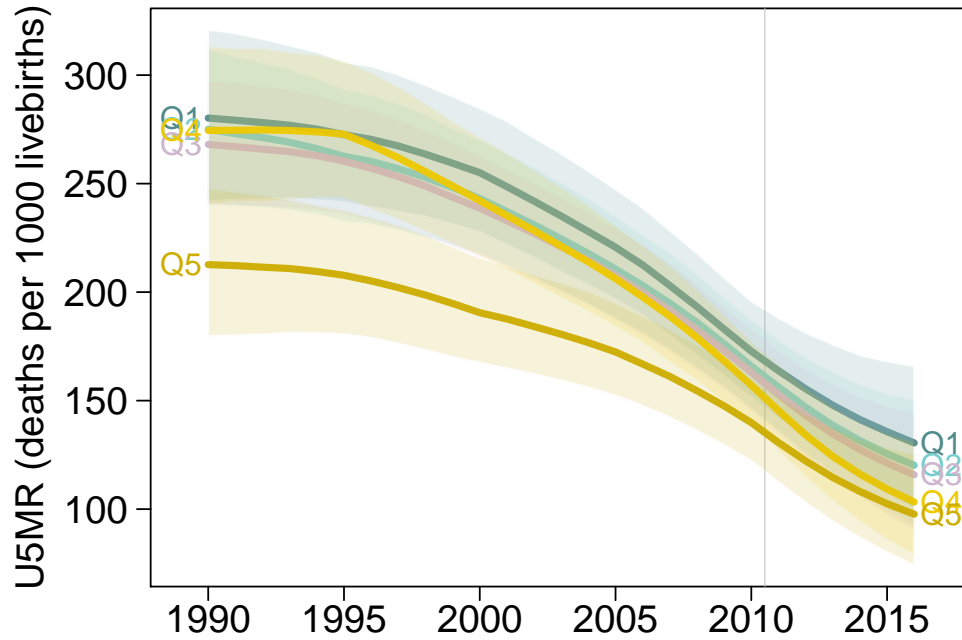

### Somalia

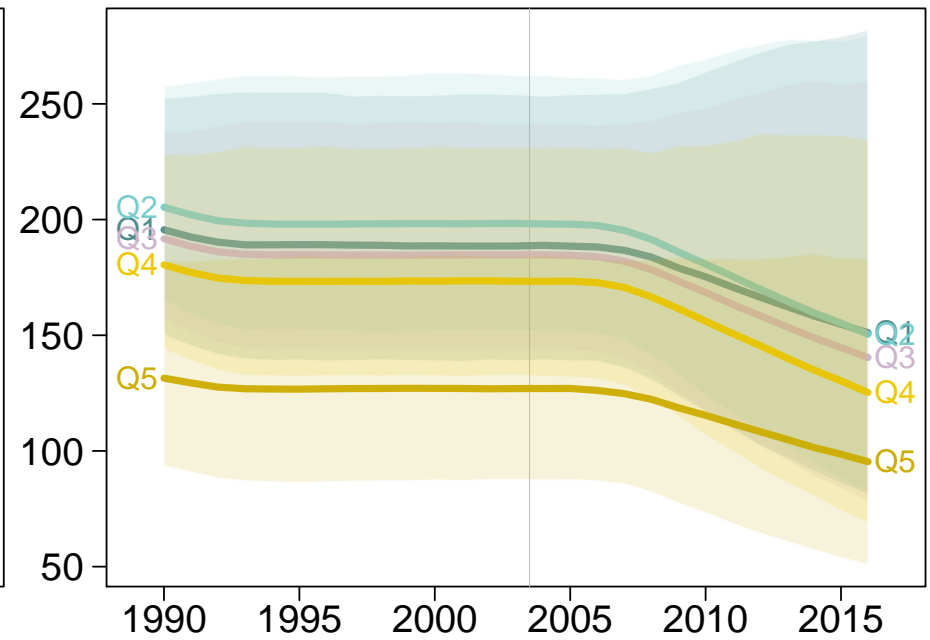

### South Africa

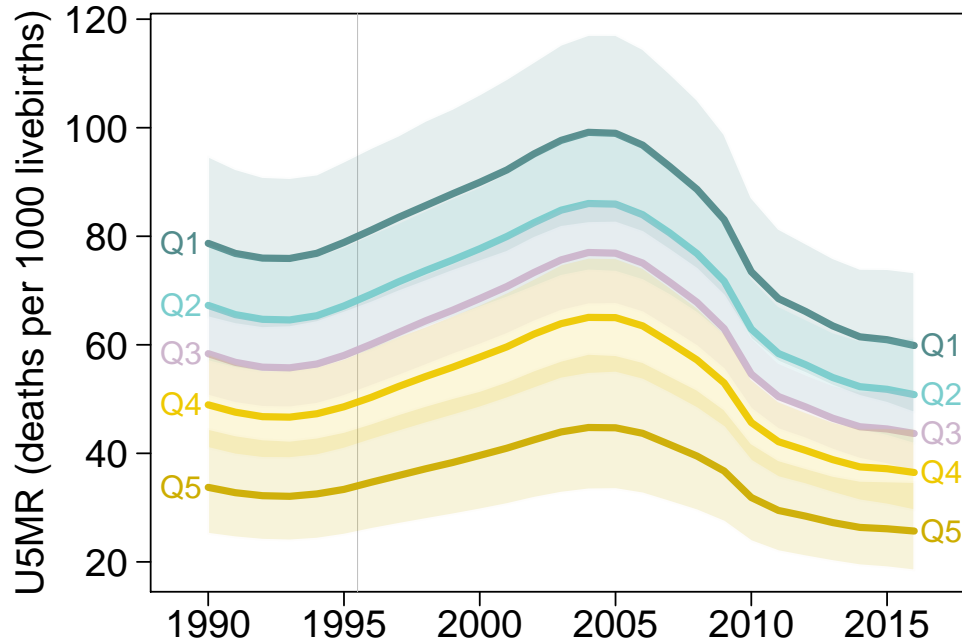

### South Sudan

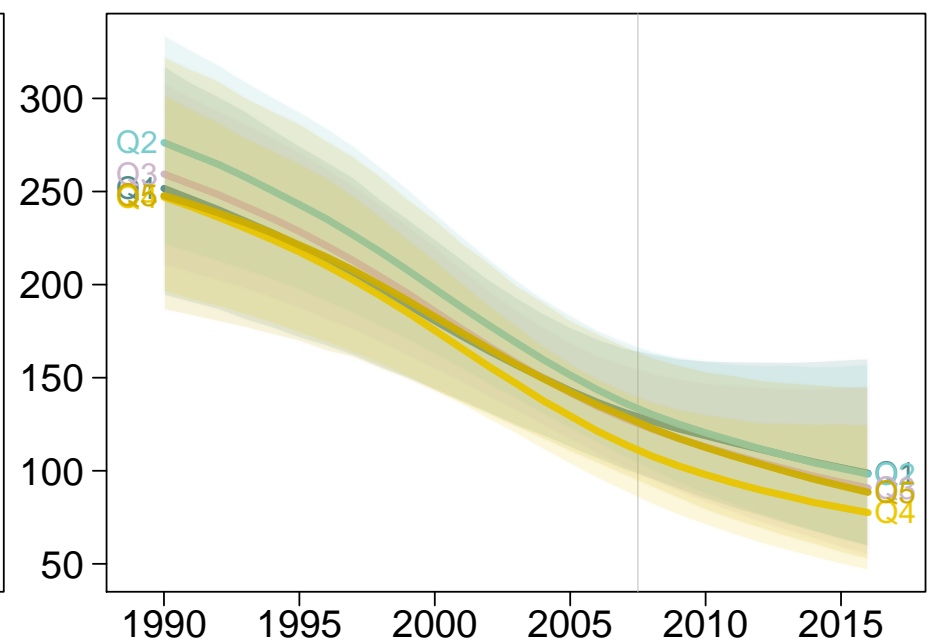



### State of Palestine

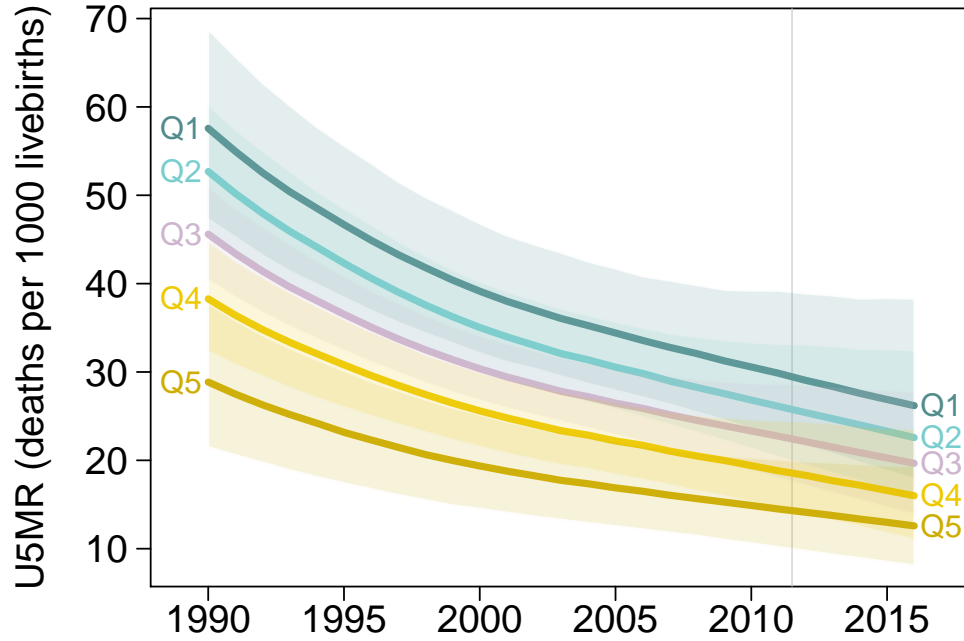

### Sudan

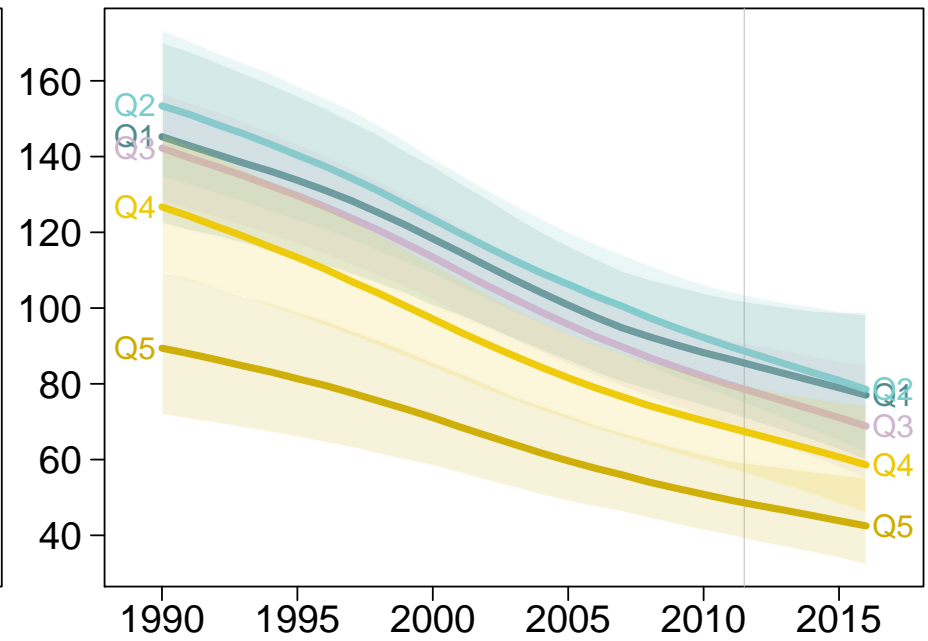

### Suriname

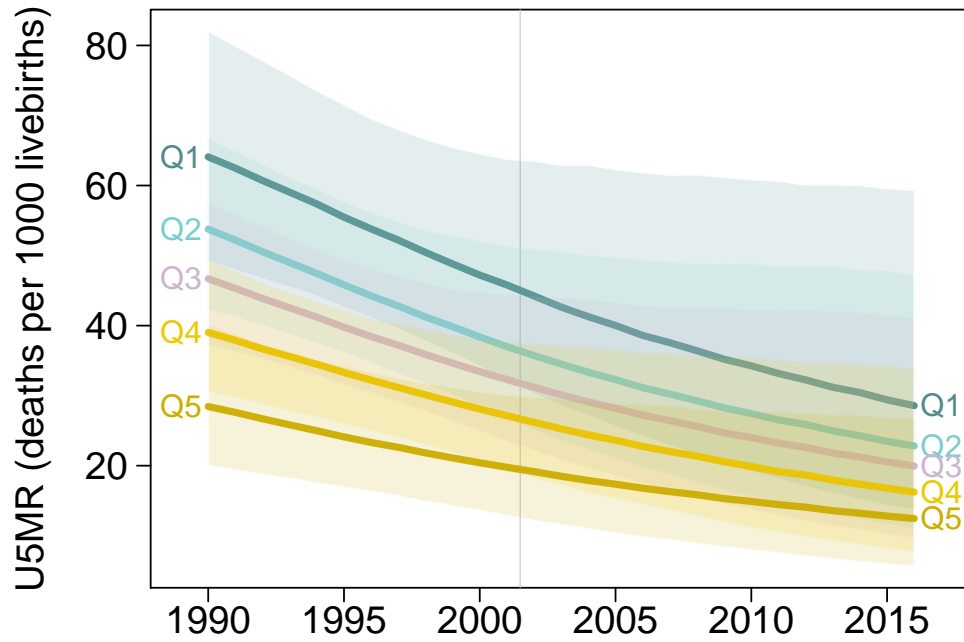

### Swaziland

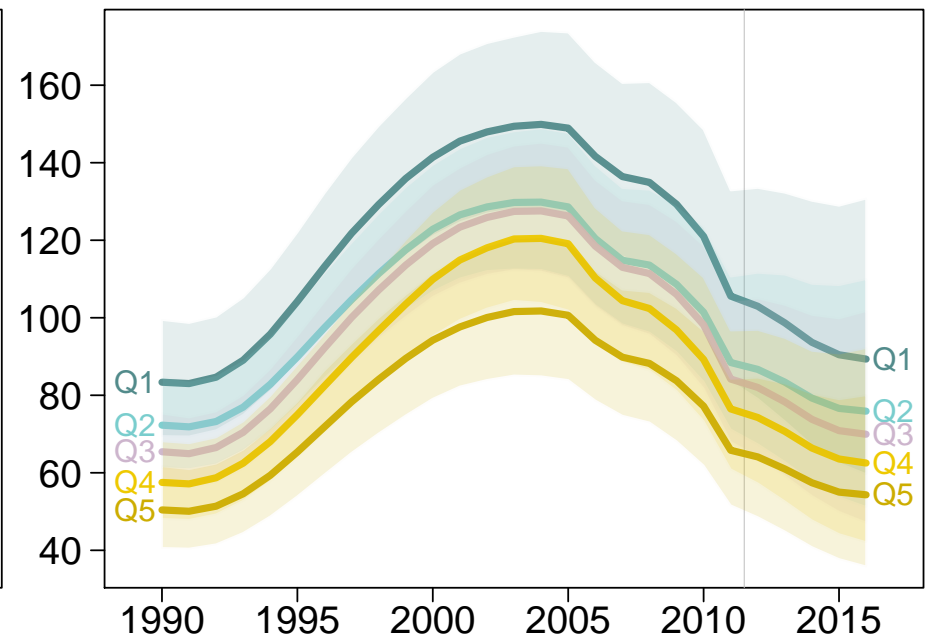

### Syrian Arab Republic

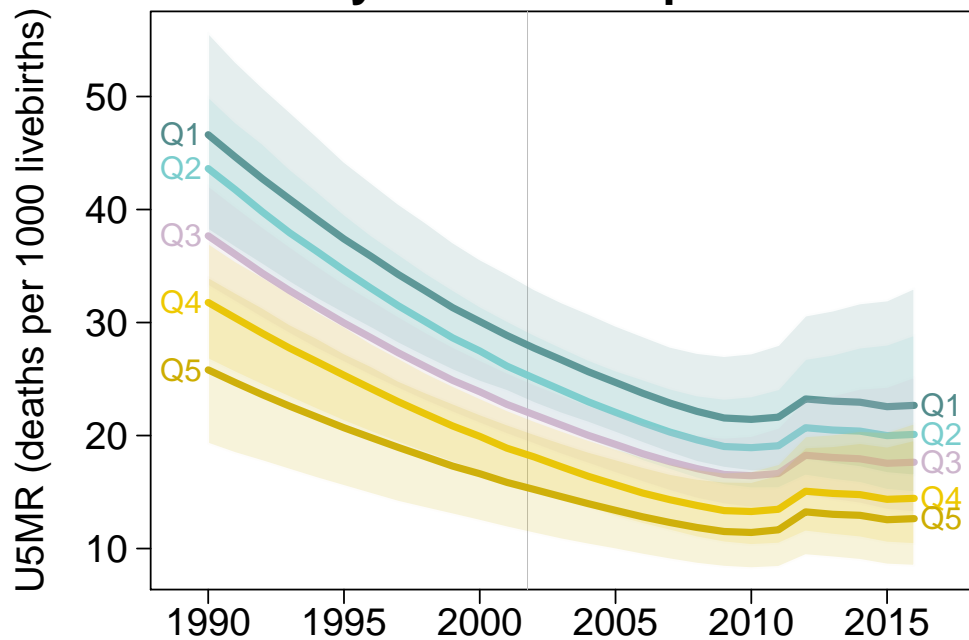

### Tajikistan

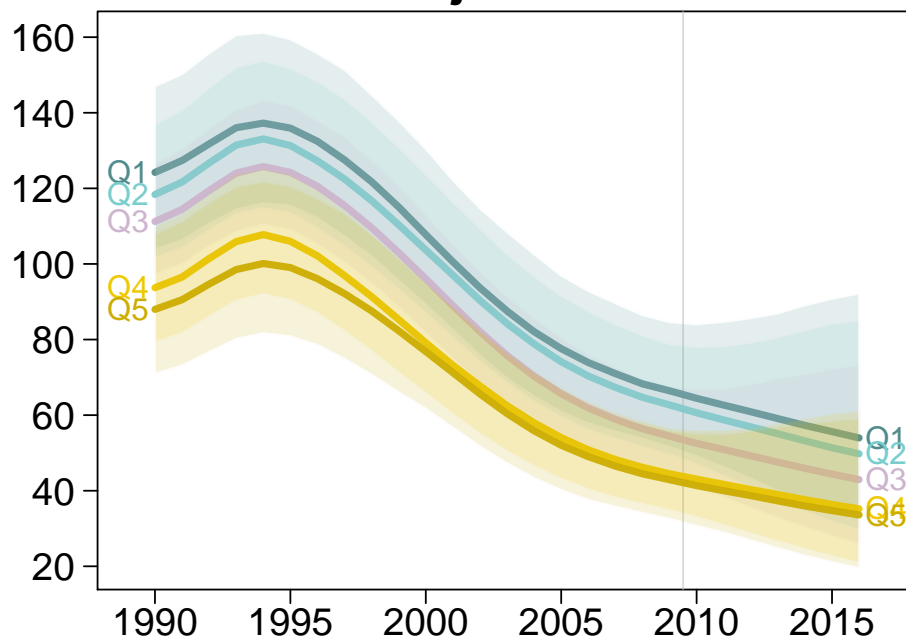

### Thailand

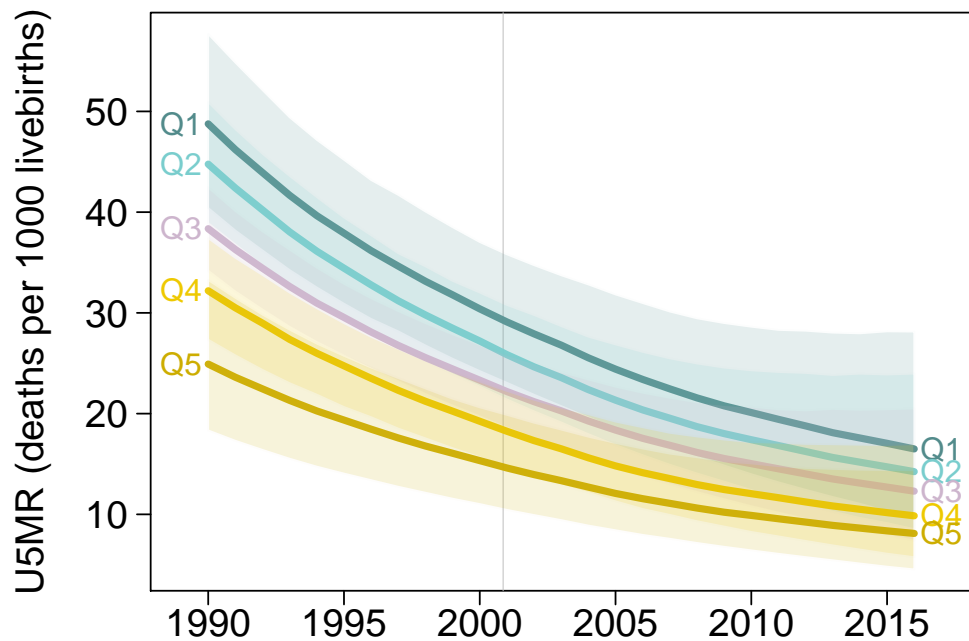

### The former Yugoslav Republic of Macedonia

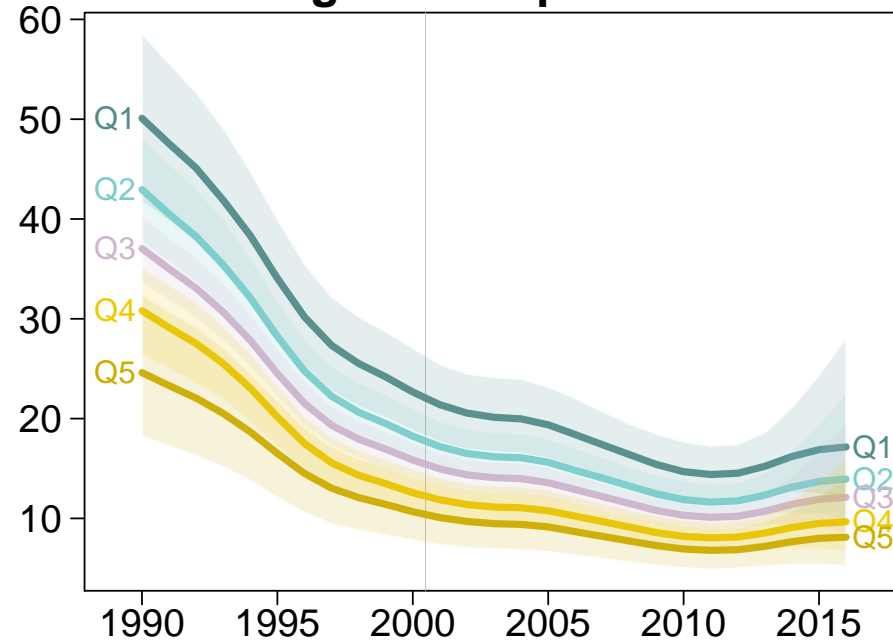

### Gambia

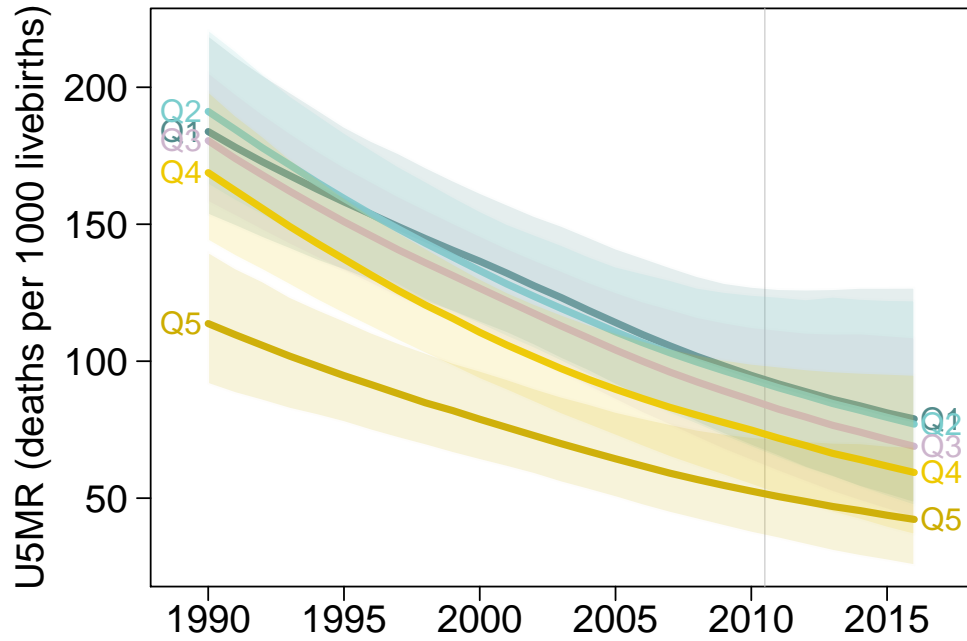

### Timor-Leste

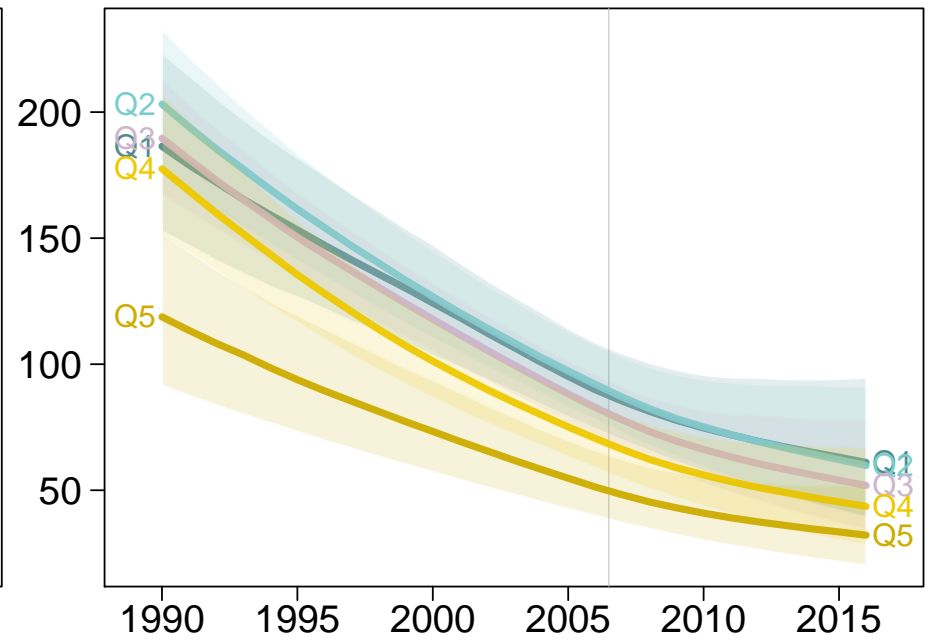

### Togo

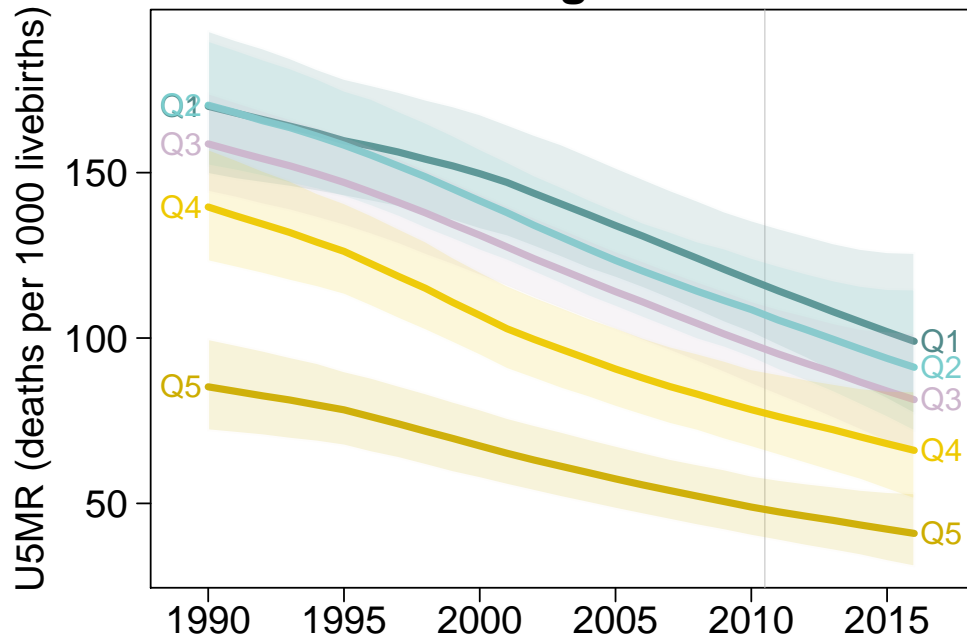

### Tunisia

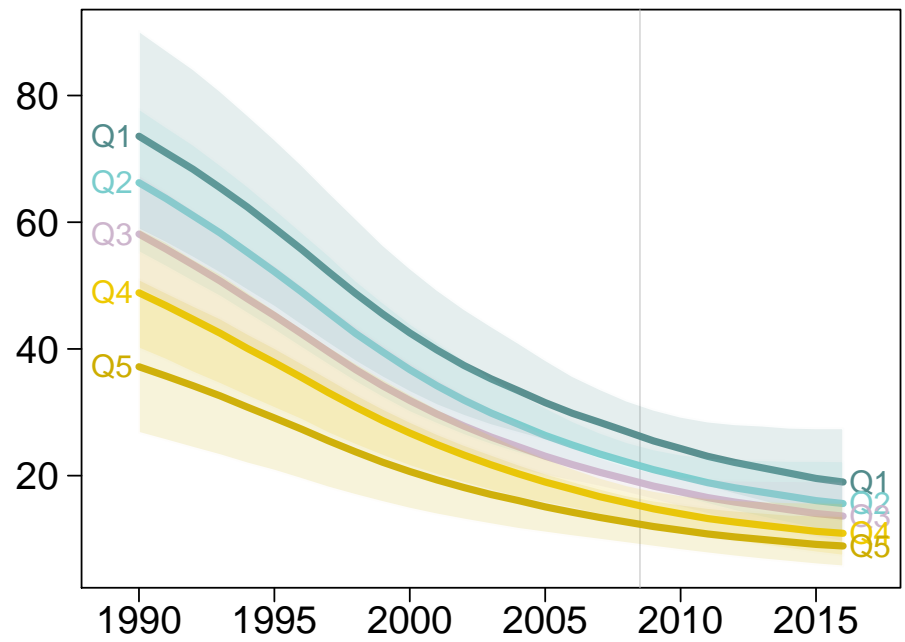

### Turkey

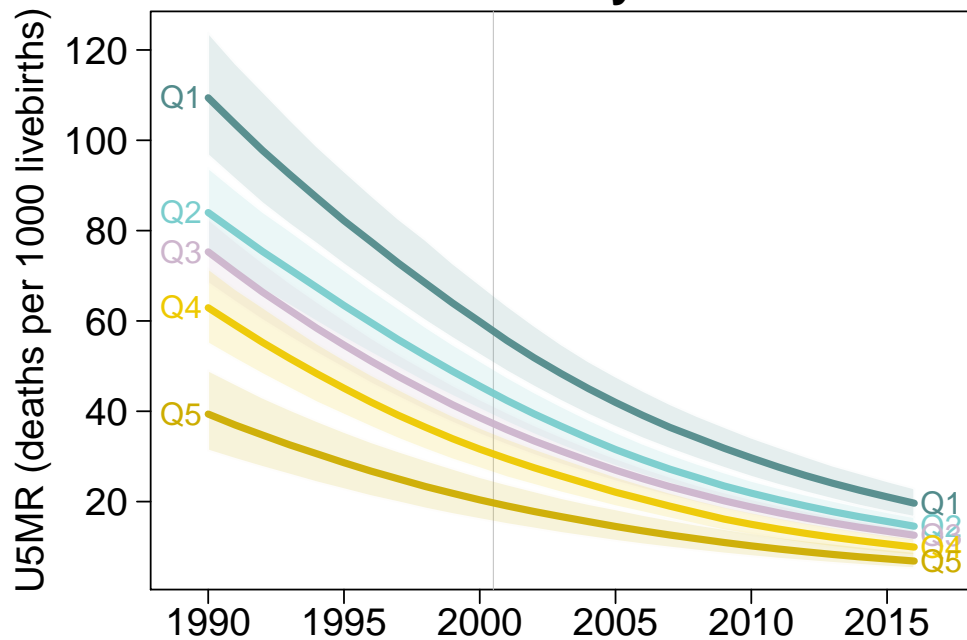

### Turkmenistan

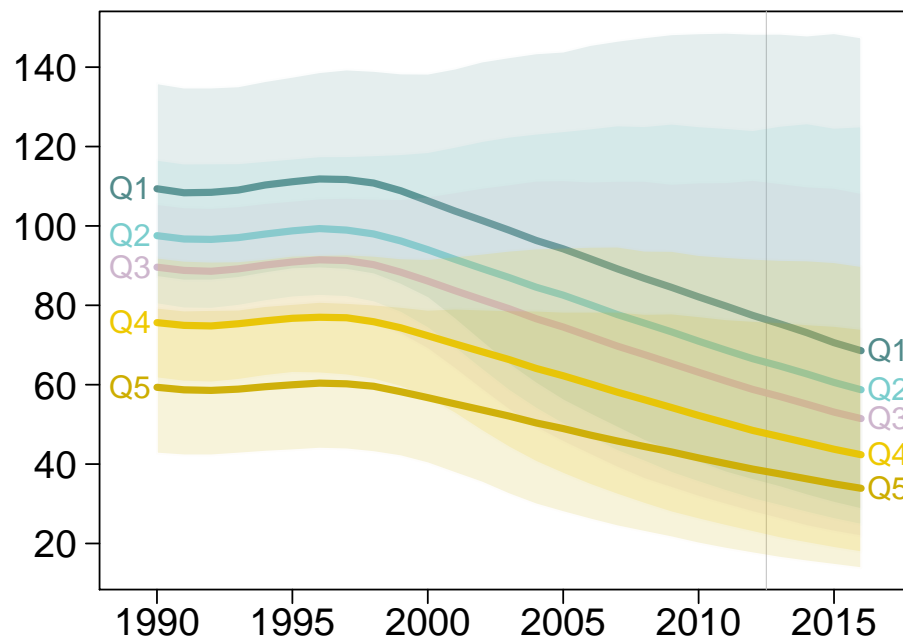

### Uganda

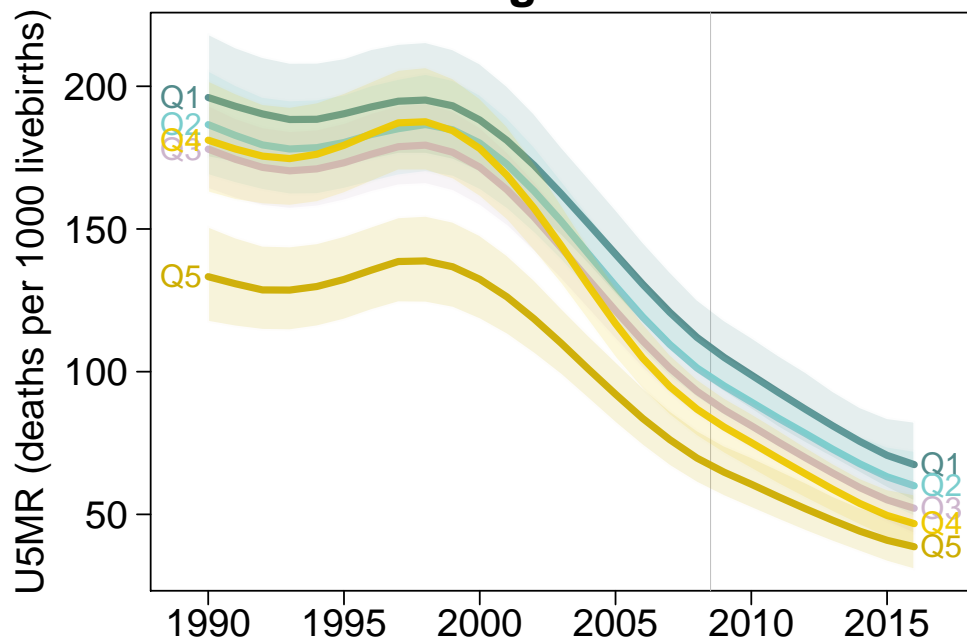

### Ukraine

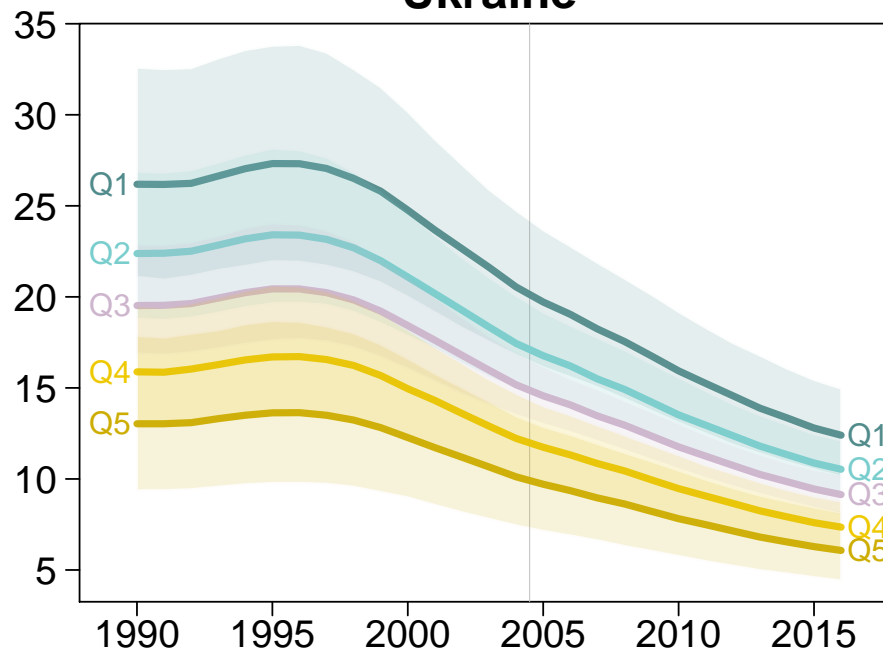

### United Republic of Tanzania

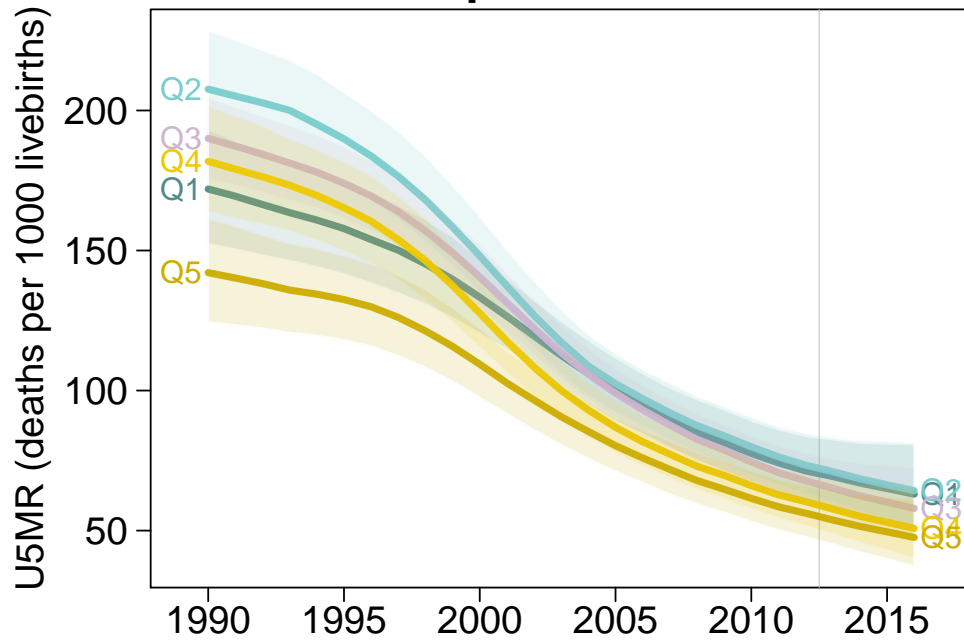

### Uzbekistan

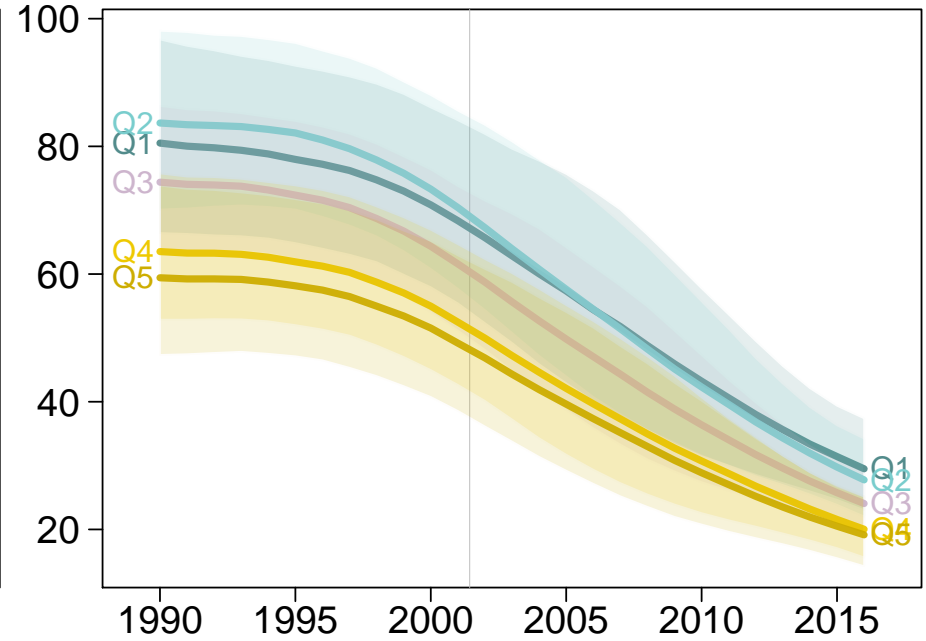

### Vanuatu

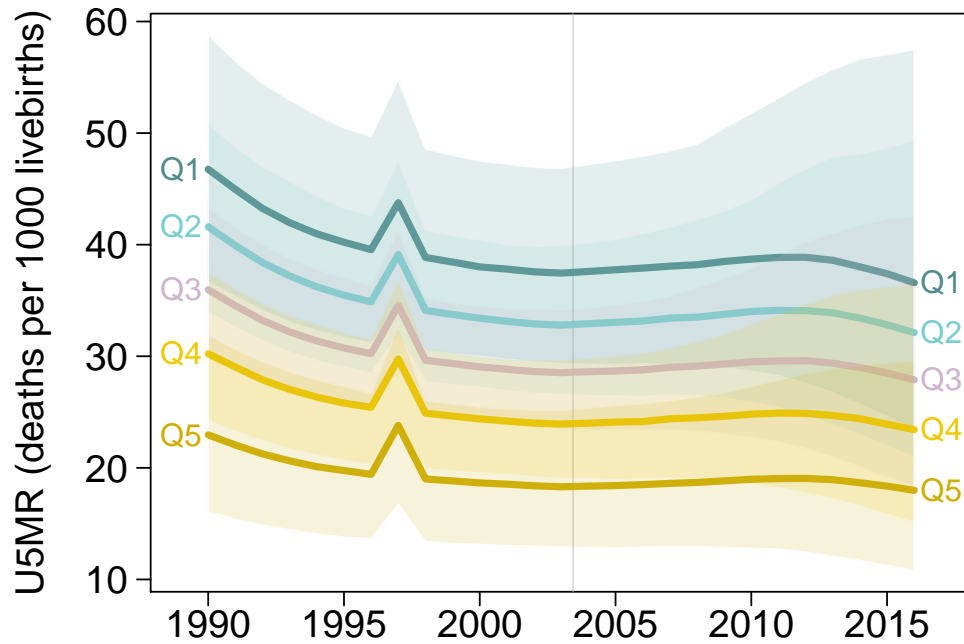

### Viet Nam

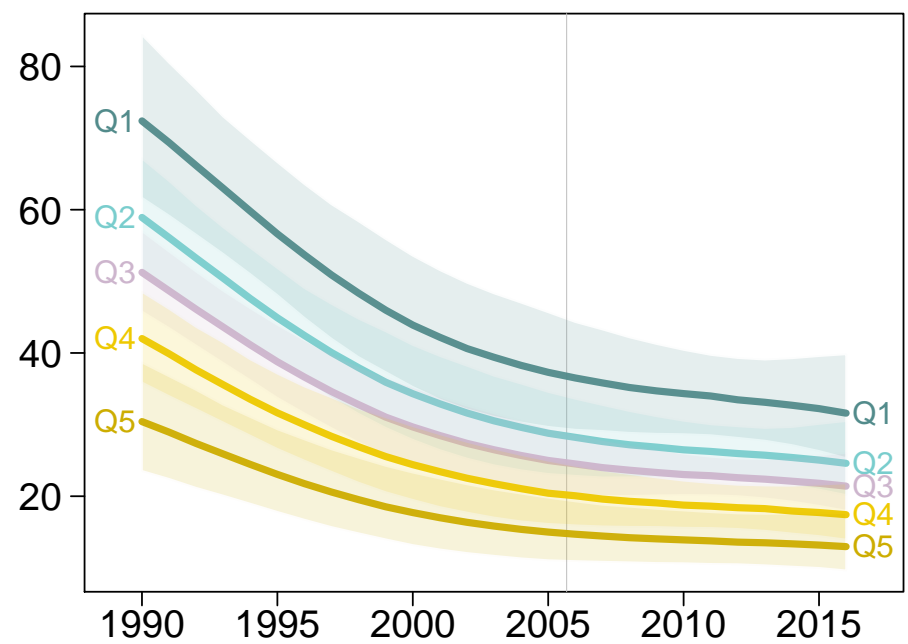

### Yemen

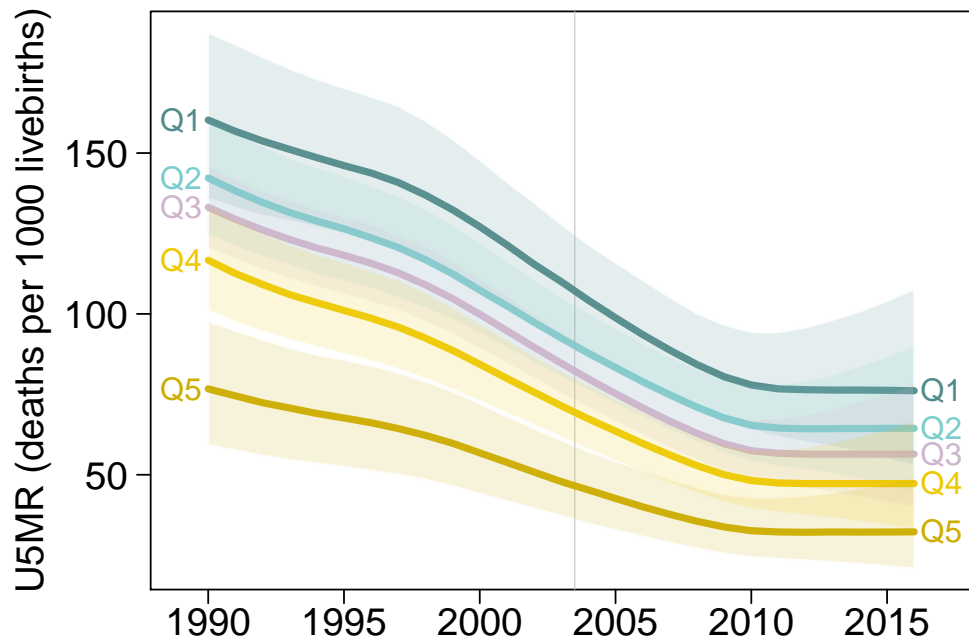

### Zambia

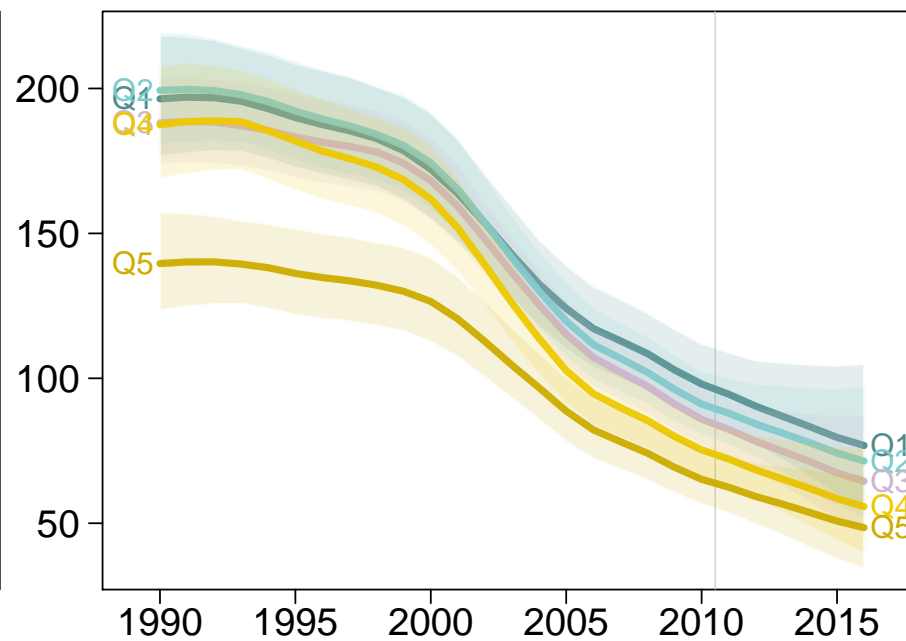

### Zimbabwe

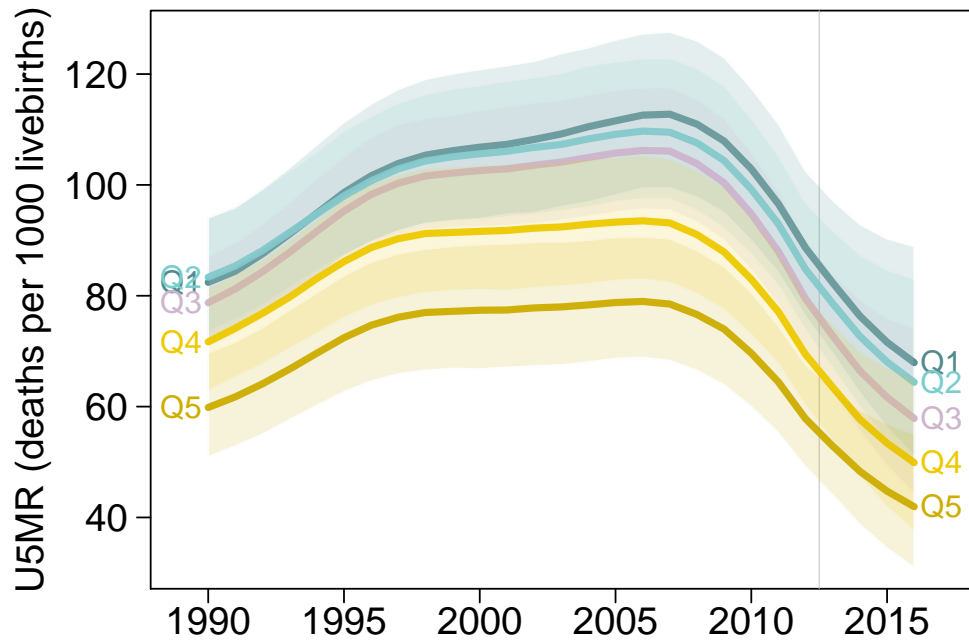

Figure 10: **Ratio of U5MR in wealth quintile 1 (poorest) to wealth quintile 5 (richest), for the 99 countries with empirical data.** Solid curves are point estimates from the model. Shaded areas around the solid curves are the 90% uncertainty intervals. The maximum and minimum point estimates within each country are the values in blue. Vertical grey lines indicate the most recent reference year of data points for each country.

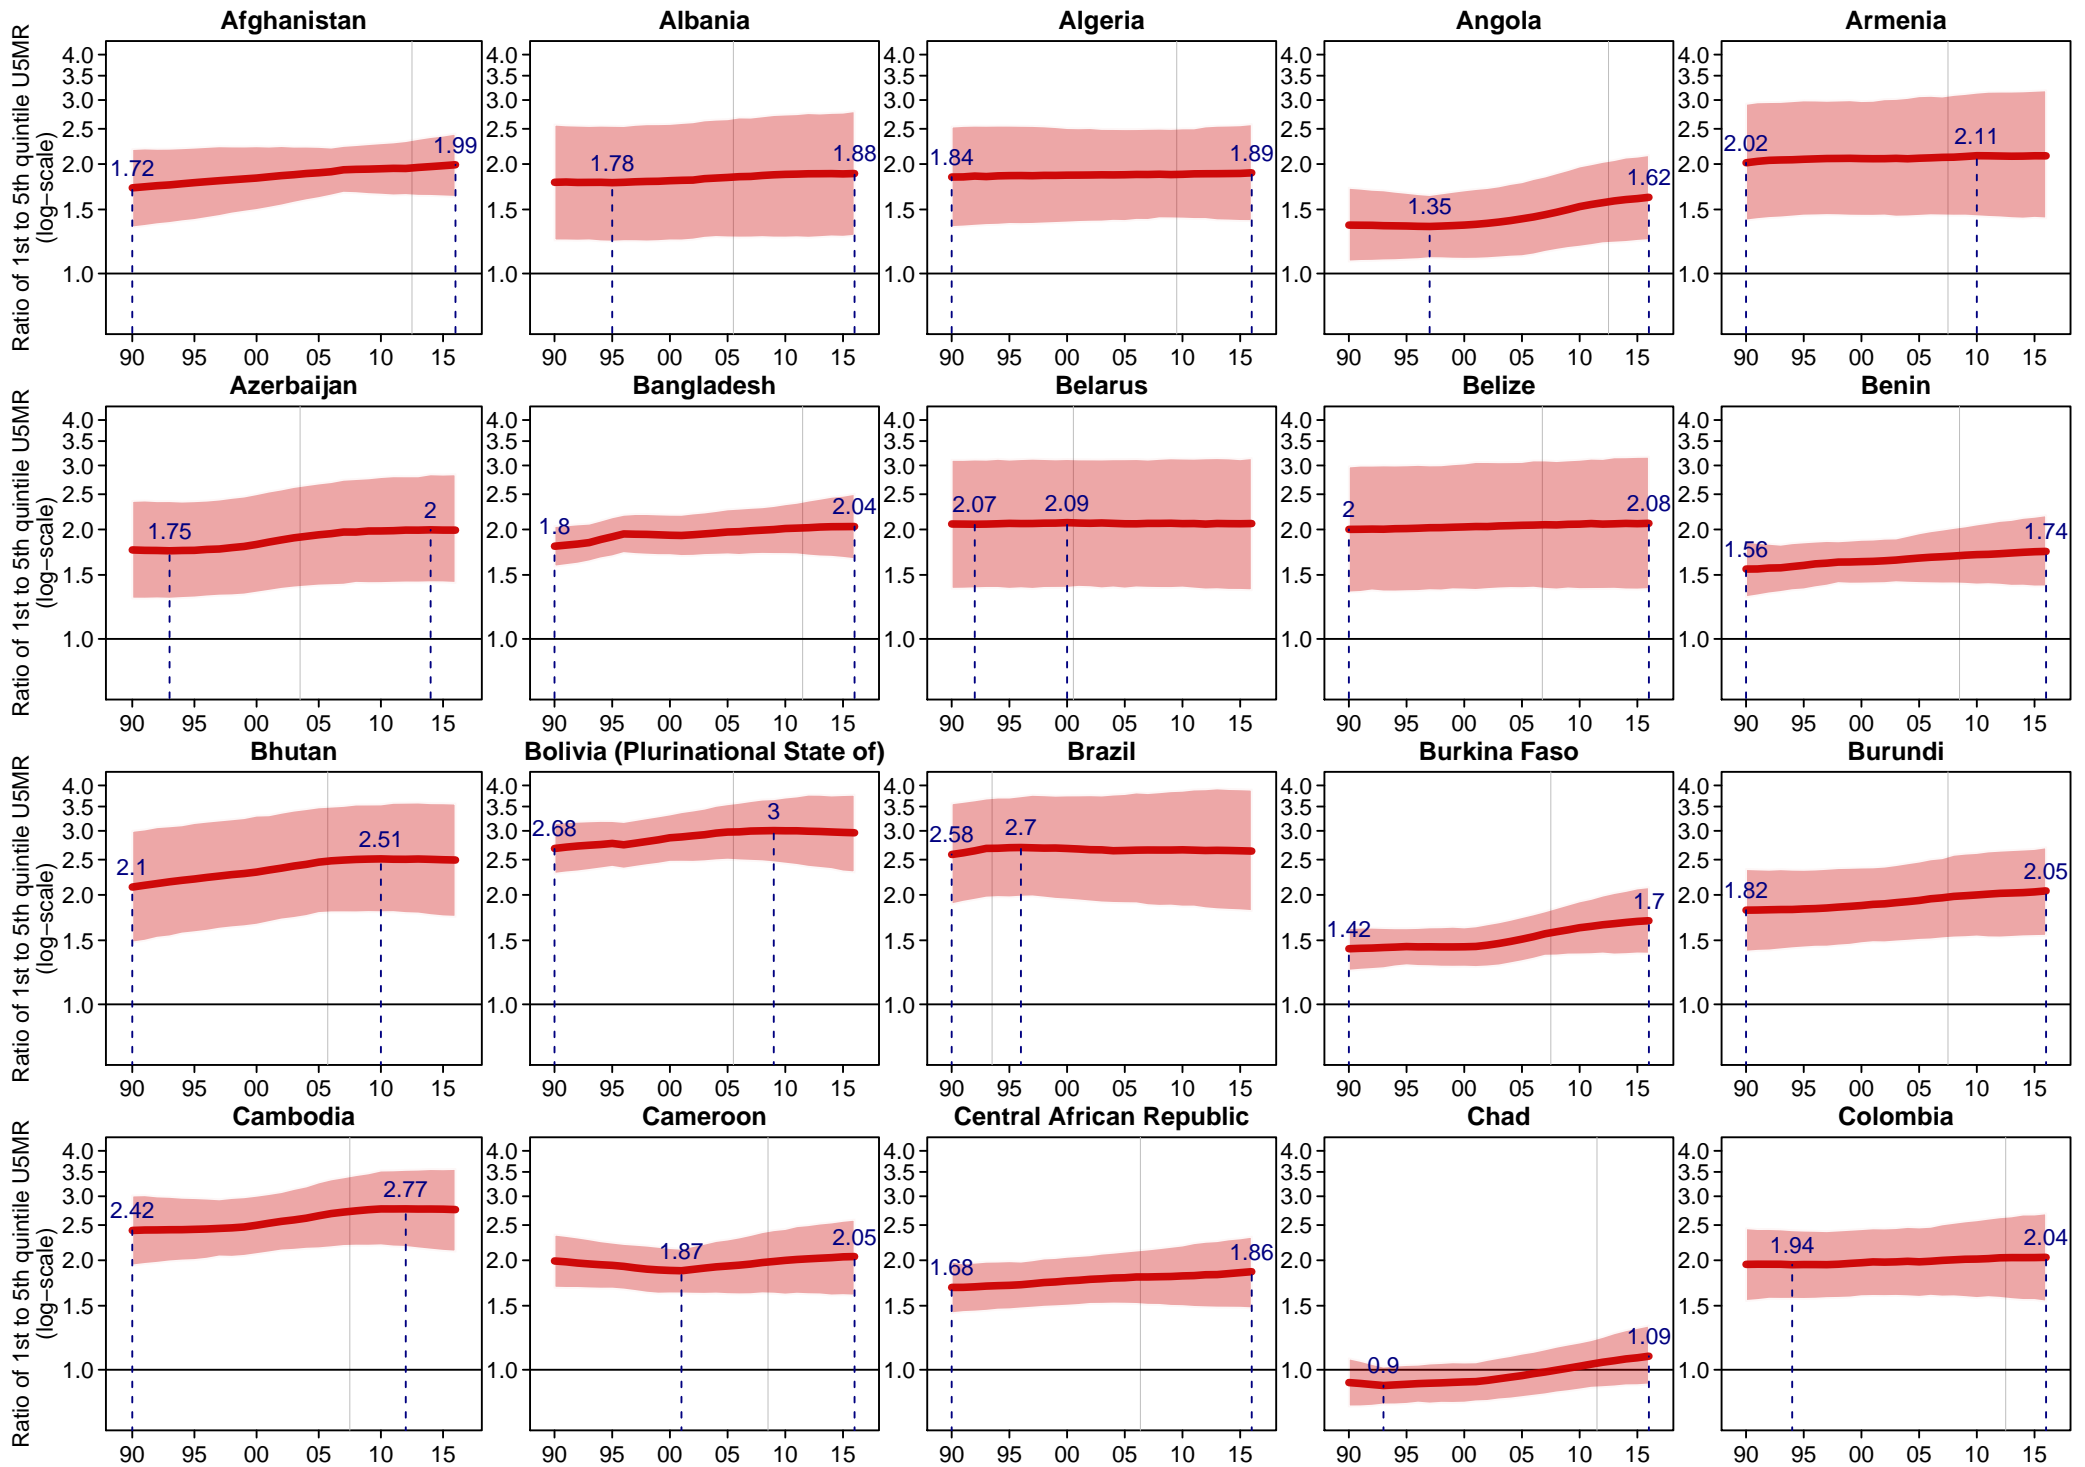



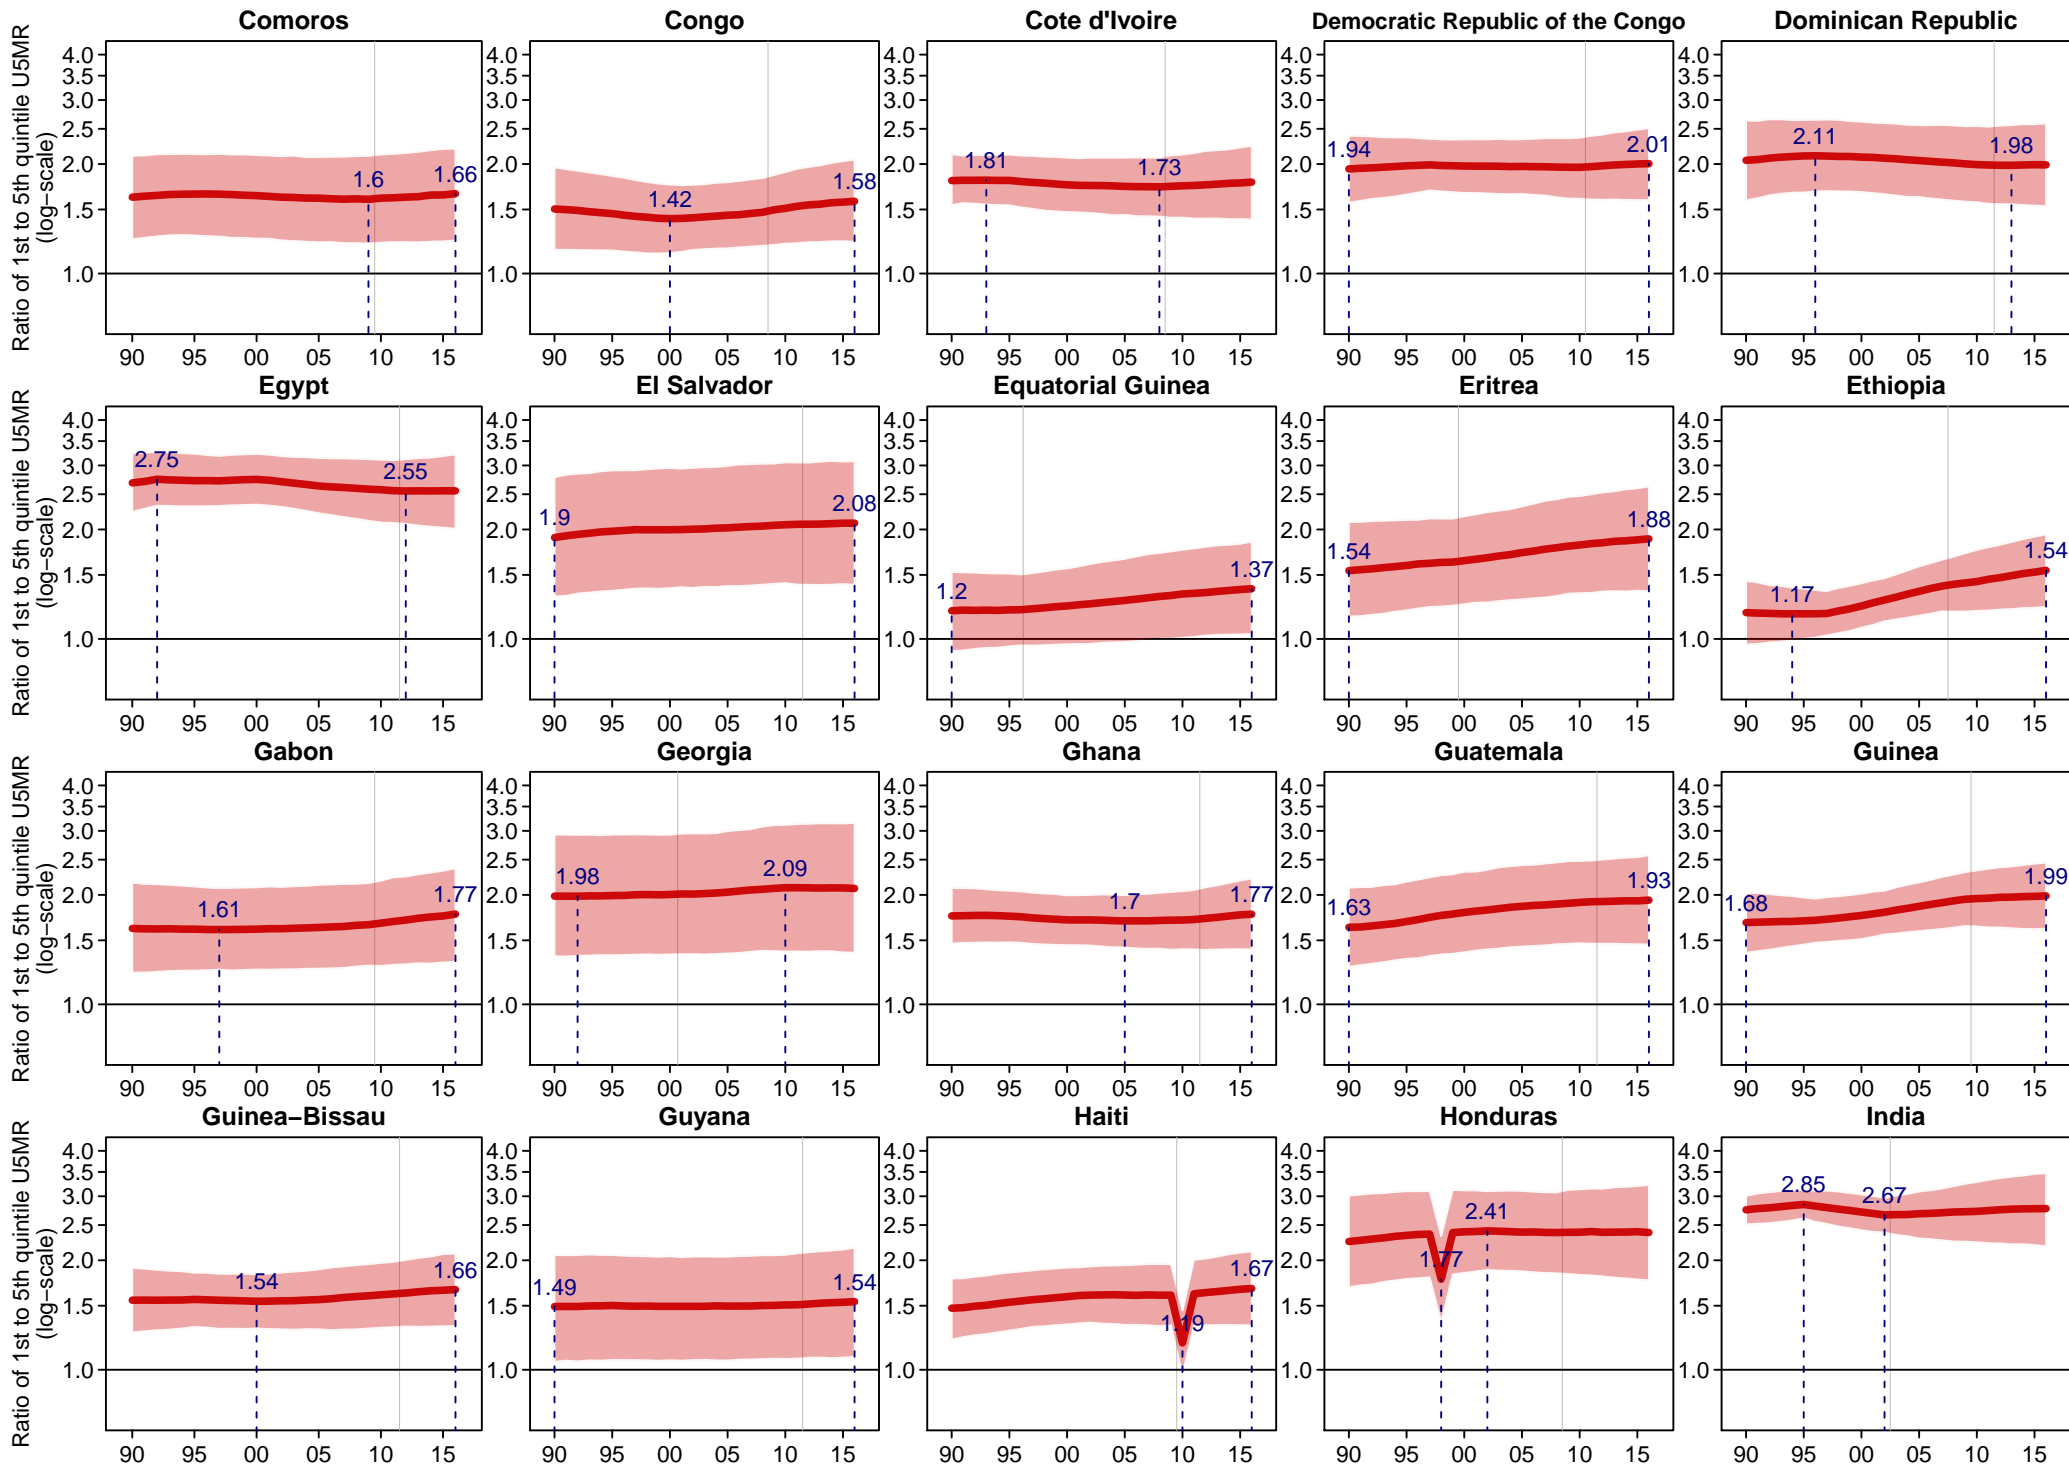

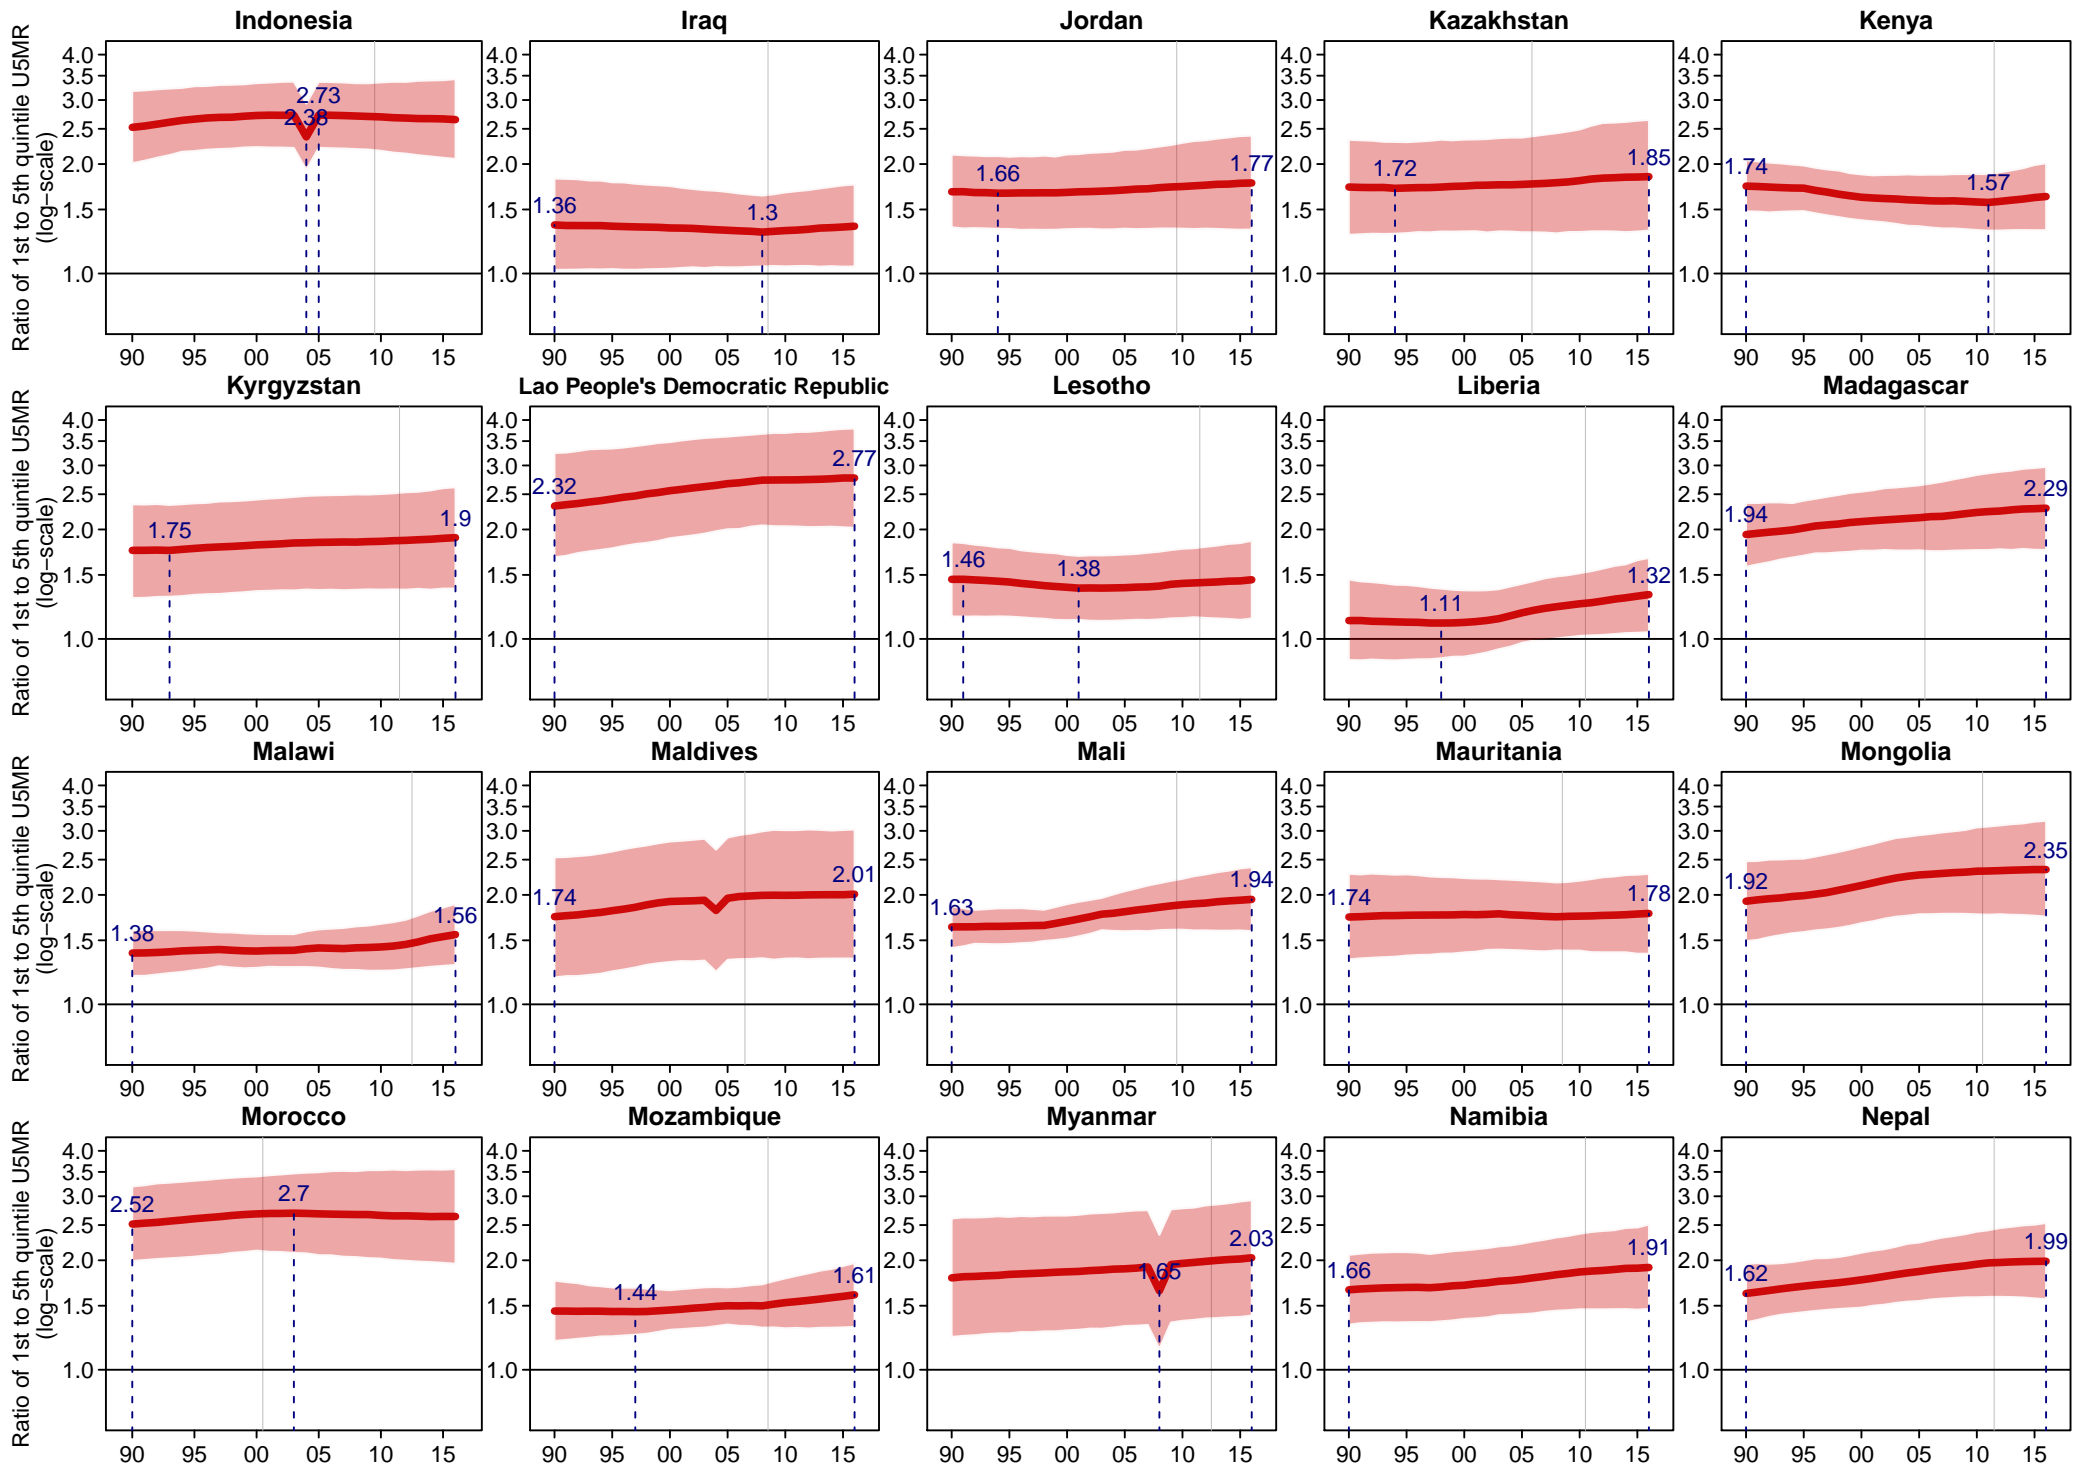

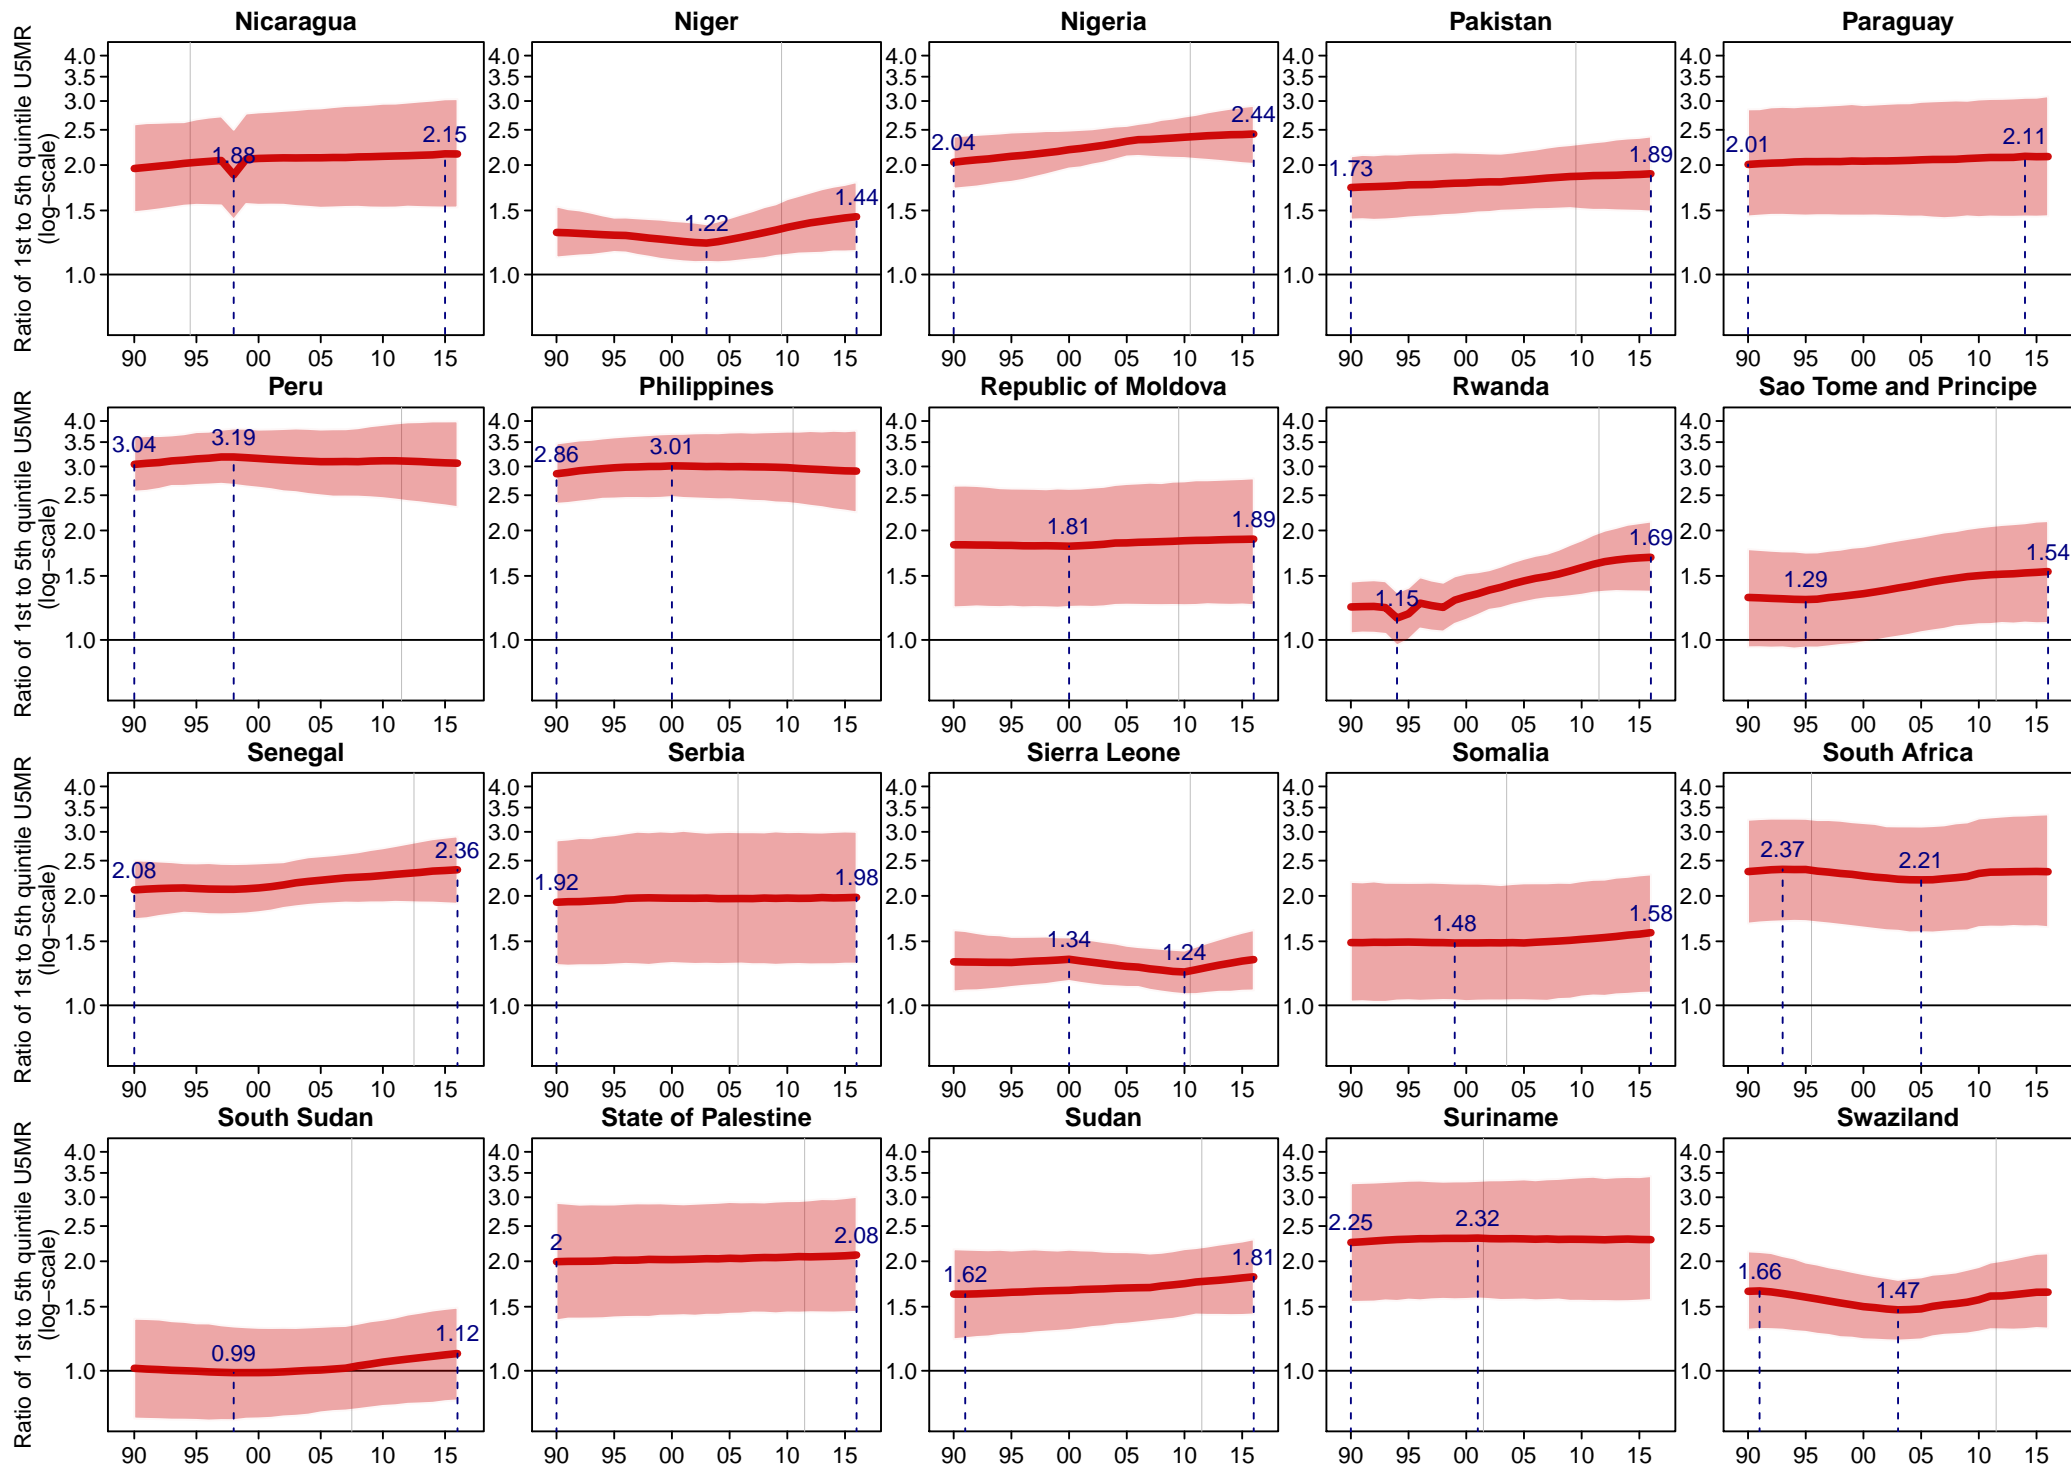

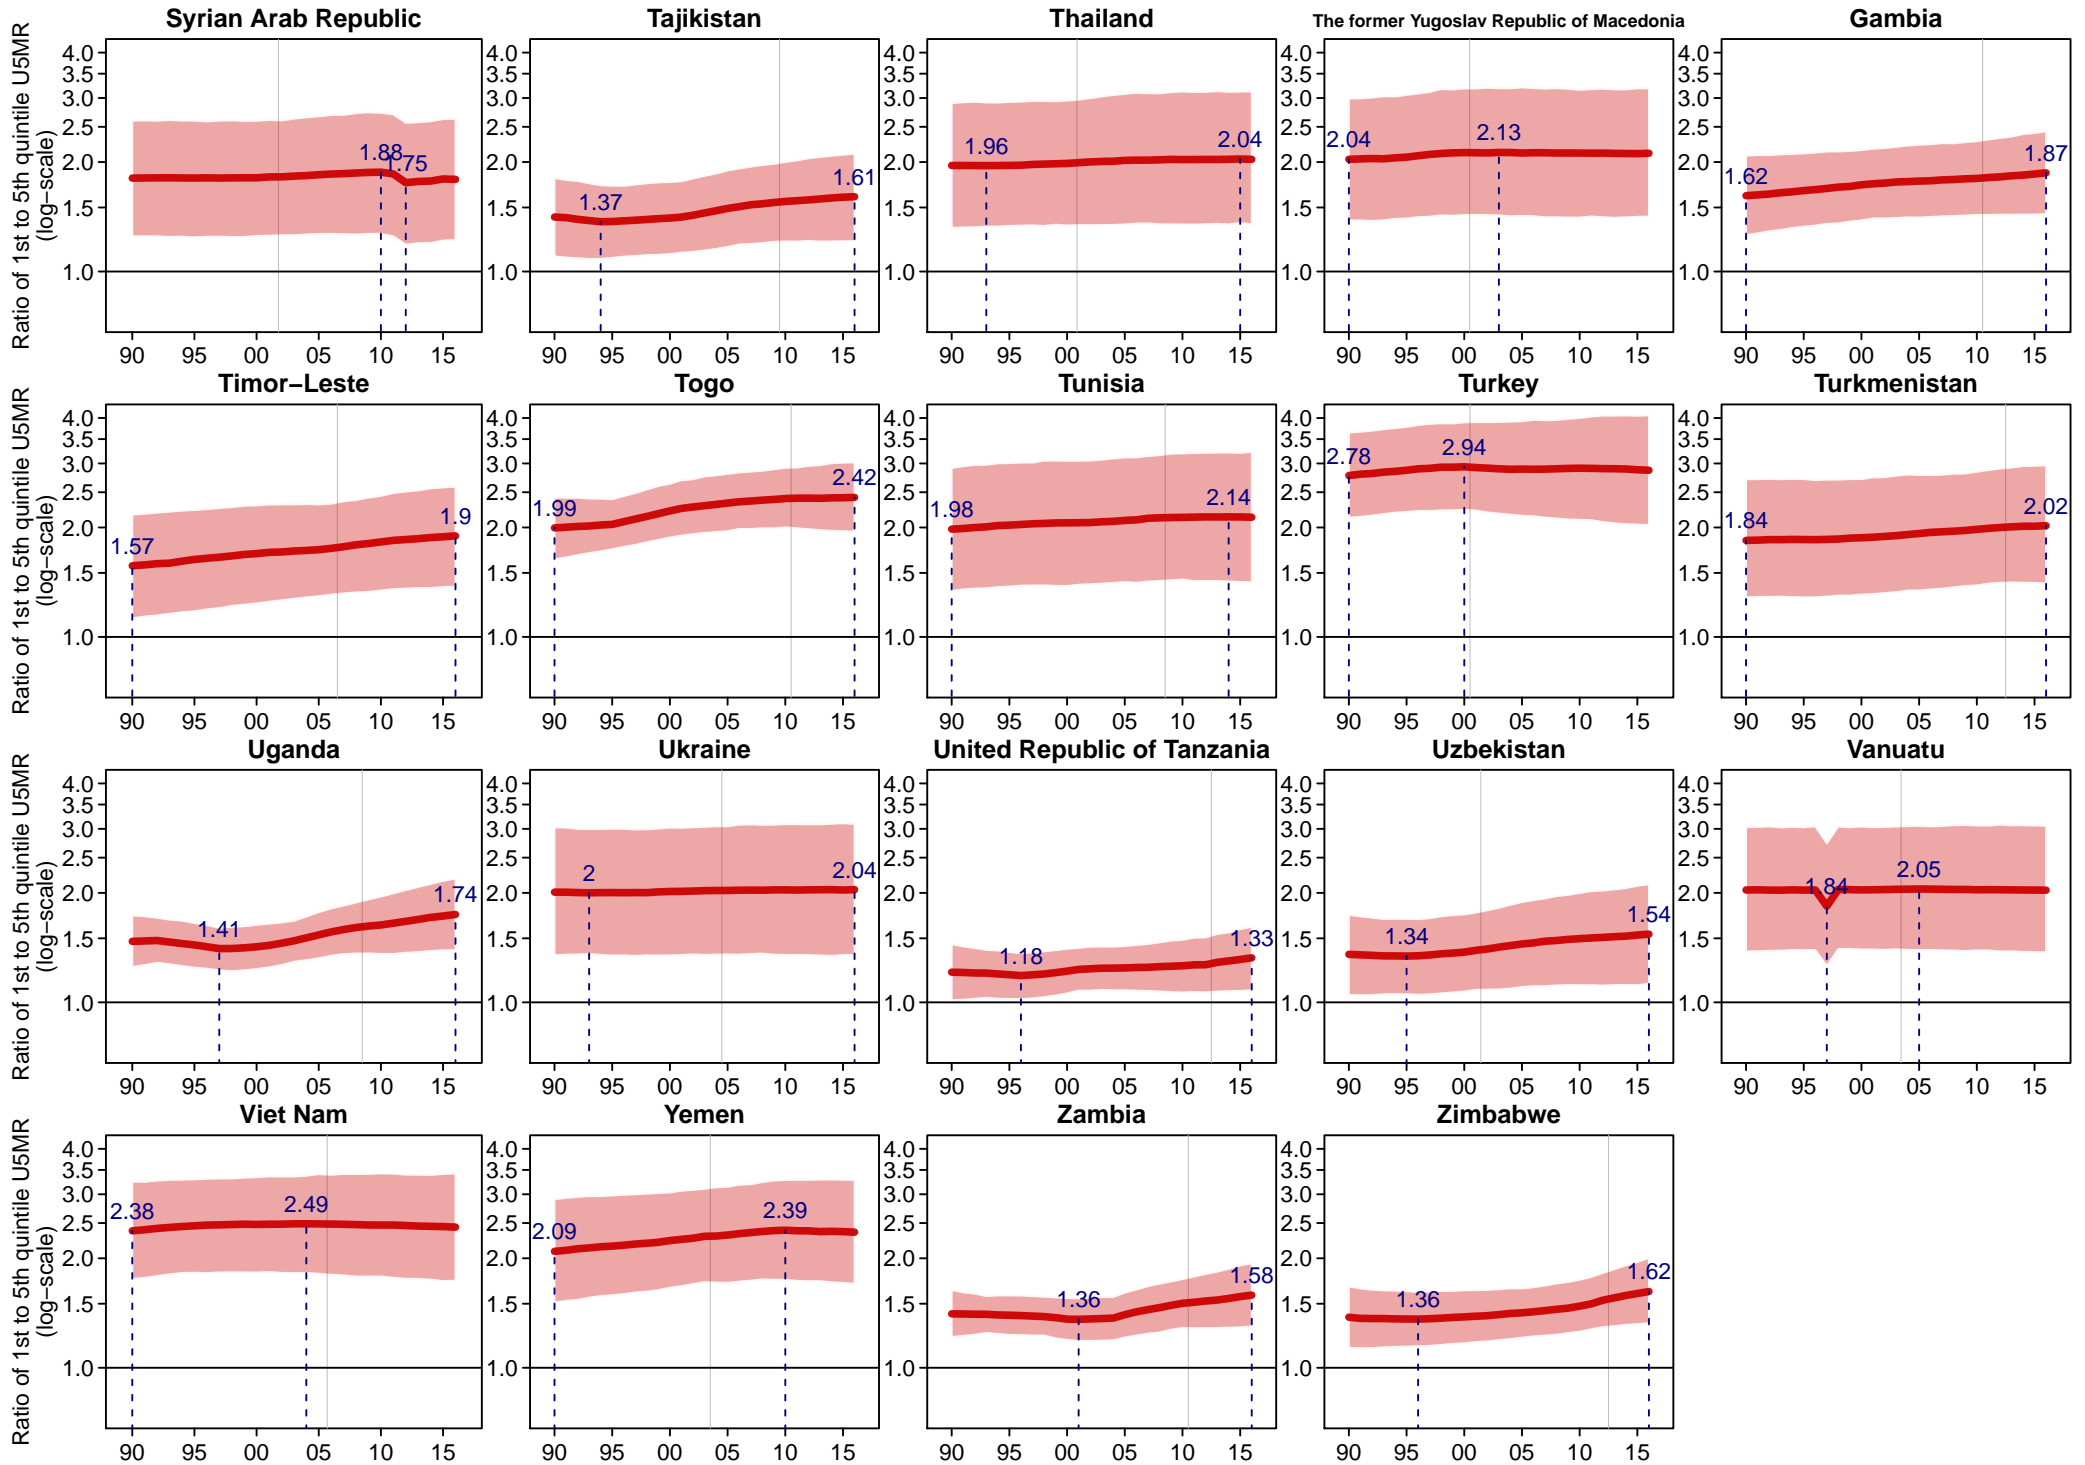

Figure 11: **All wealth quintile-specific results, for the 99 countries with empirical data.** 1st row: (i) wealth quintile-specific U5MR (blue); (ii) the point estimates of national-level U5MR from IGME 2017 results (black). 2nd row: number of wealth quintile-specific under-5 deaths. 3rd row (all on log-scale): (i) estimated ratio of wealth quintile-specific U5MR to national-level U5MR (red); (ii) expected ratio of wealth quintile-specific U5MR to national-level U5MR (green); (iii) colored dots refer to the ratio of wealth quintile-specific U5MR from survey to national-level U5MR from survey (these dots are the input data in our data model); (iv) vertical line segments around the dots are sampling errors and different colors differentiate data series. 4th row: percentage of wealth quintile-specific under-5 deaths among national-level under-5 deaths (in %). Results for wealth quintile groups 1 (the poorest) to 5 (the richest) are displayed in the five columns respectively. Solid curves are point estimates from the model. Shaded areas around the solid curves are the 90% uncertainty intervals. Vertical grey lines indicate the most recent reference year of data points for each country.

# Afghanistan

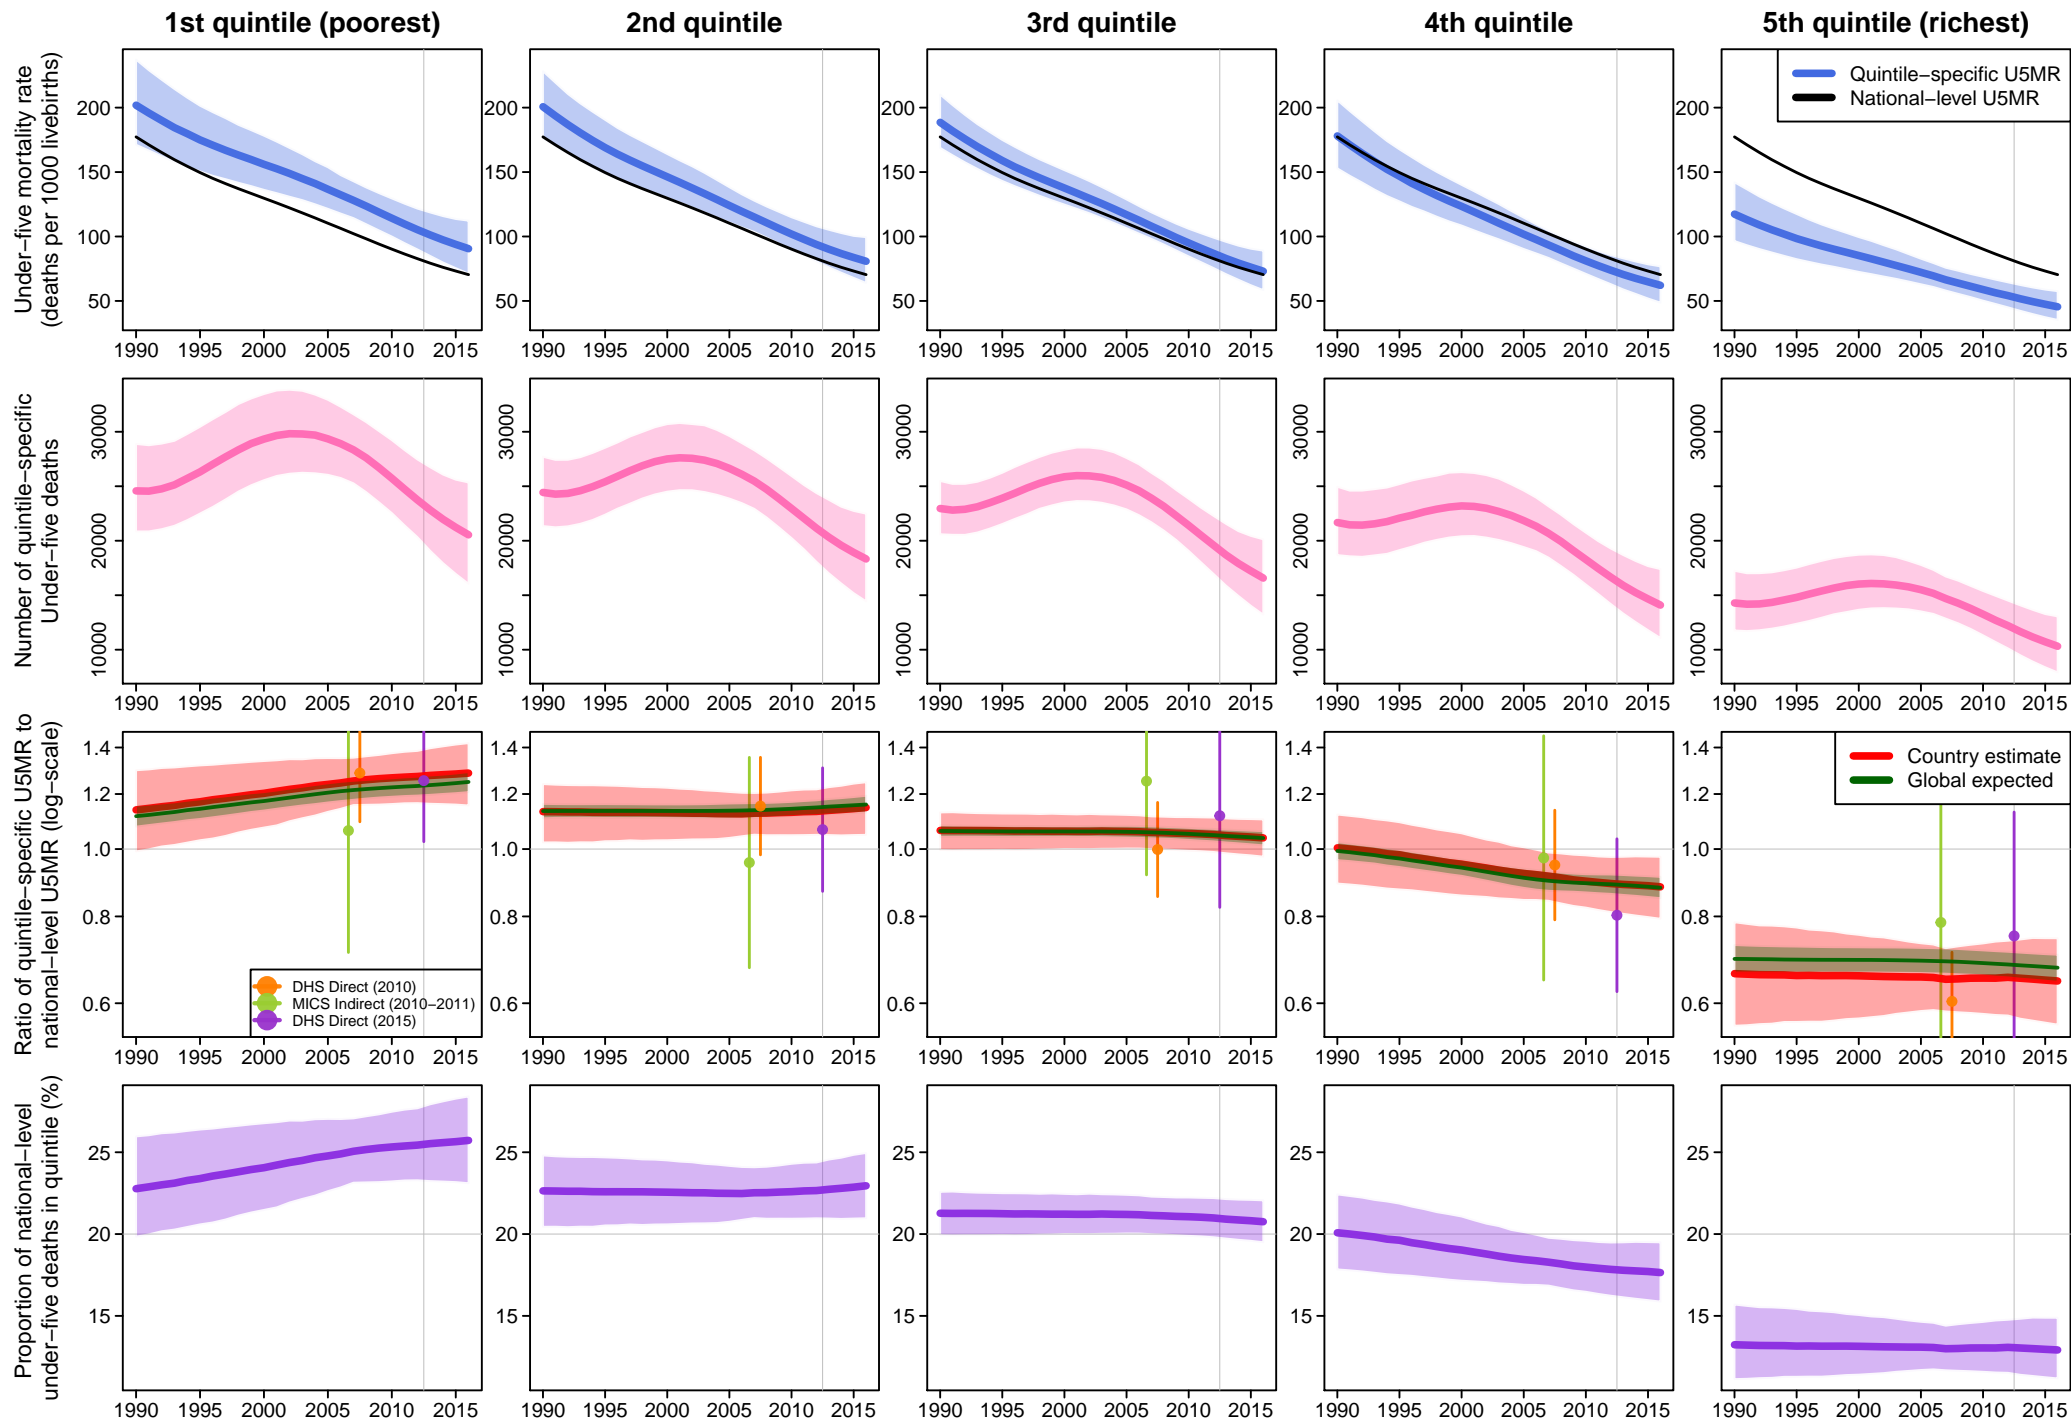

# Albania

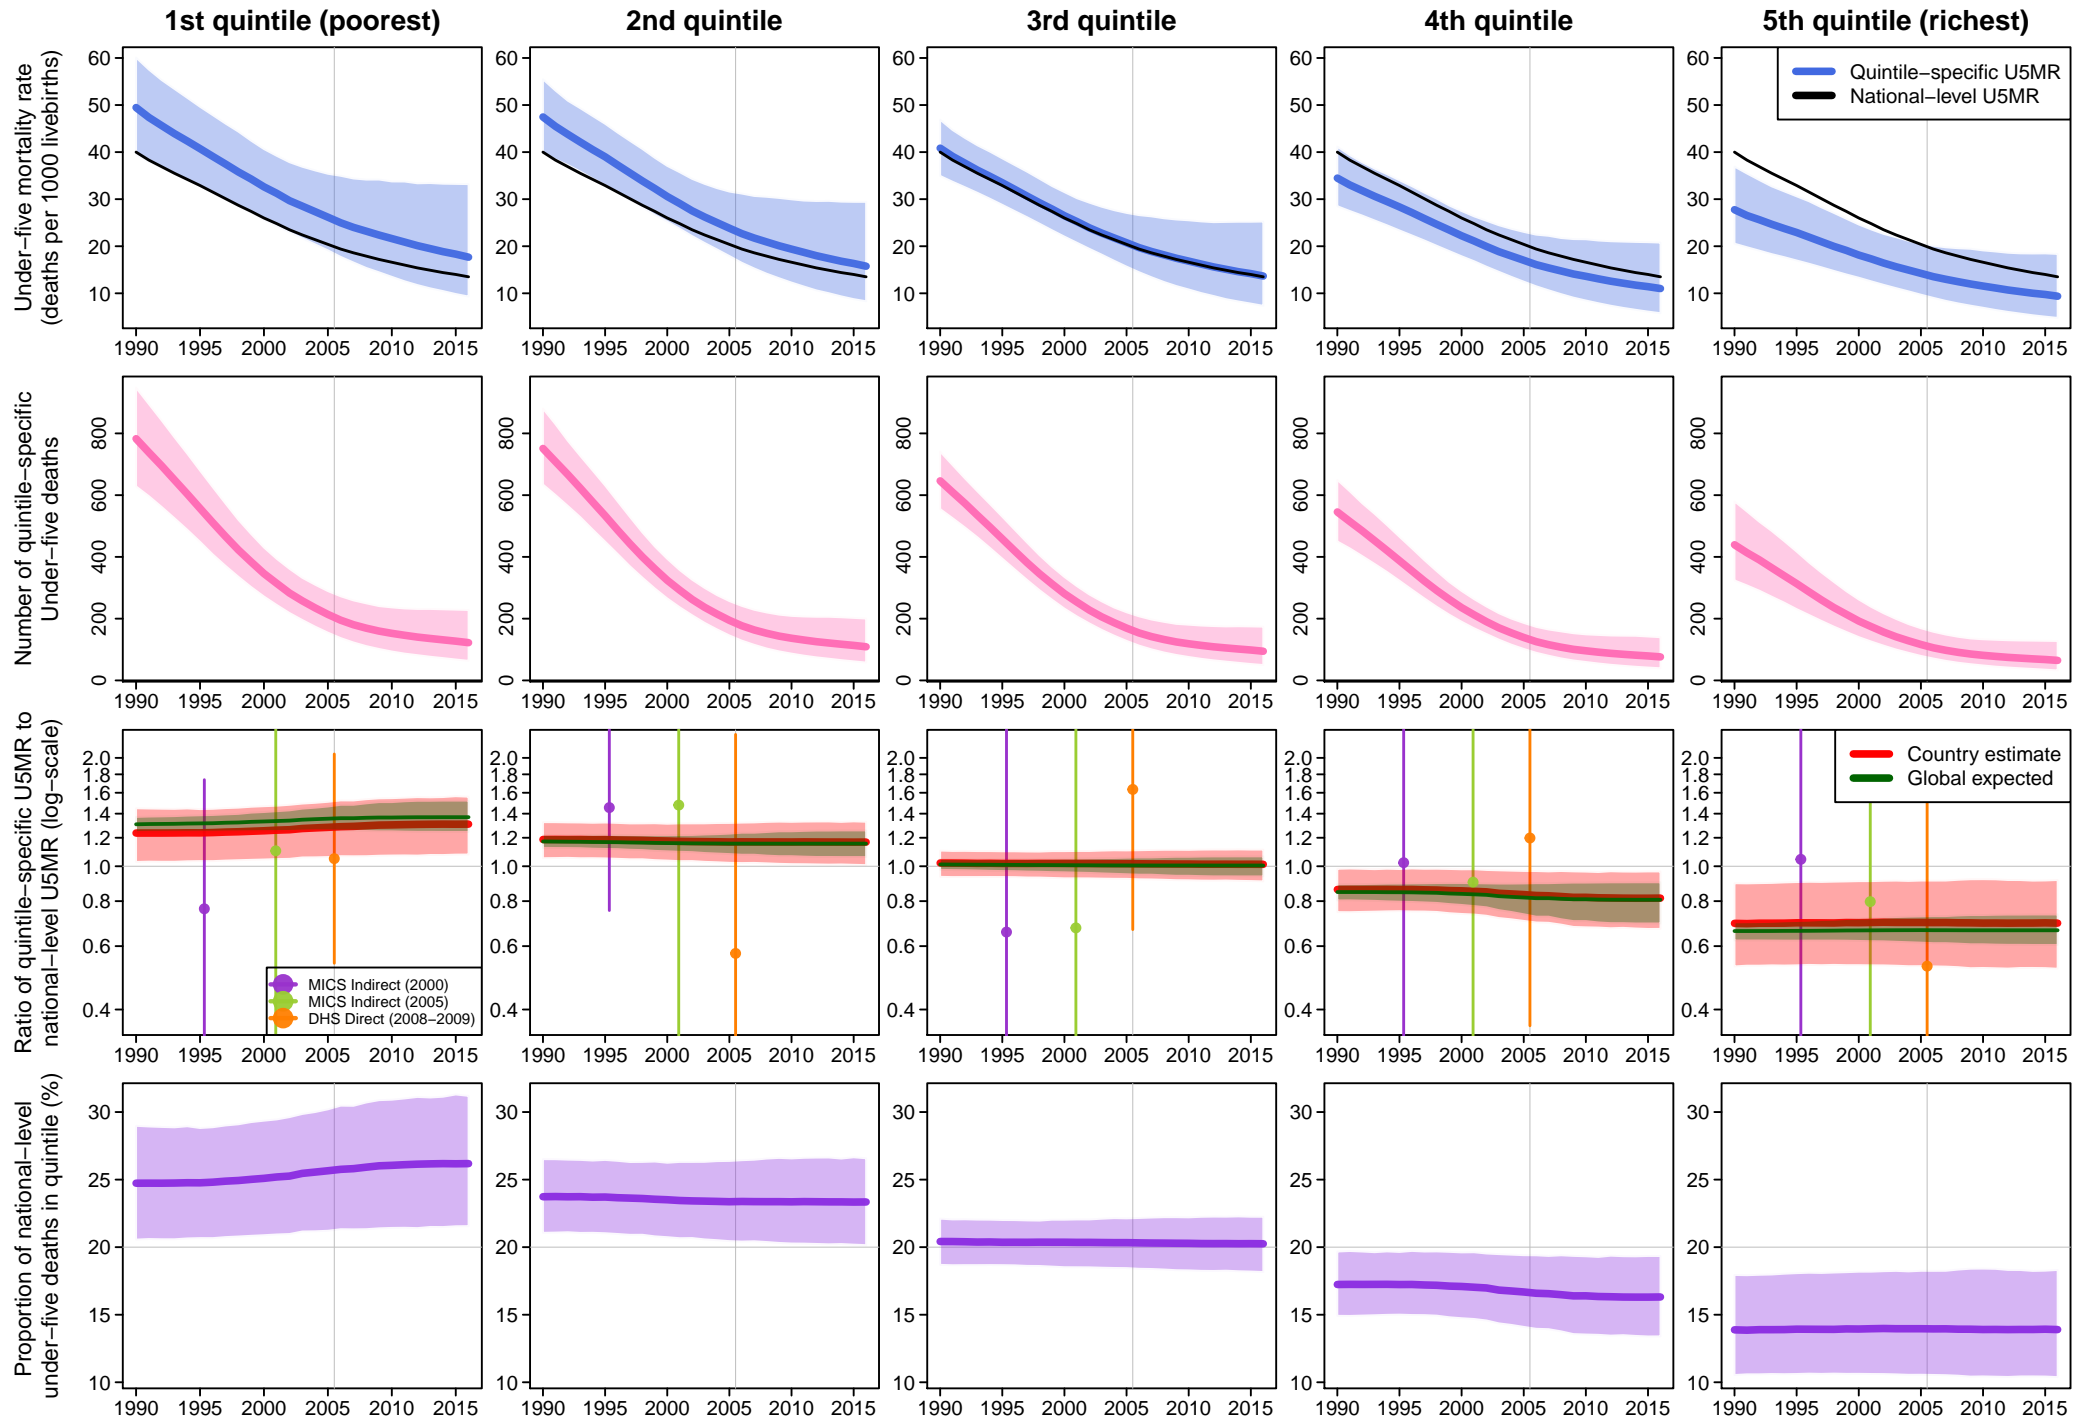

# Algeria

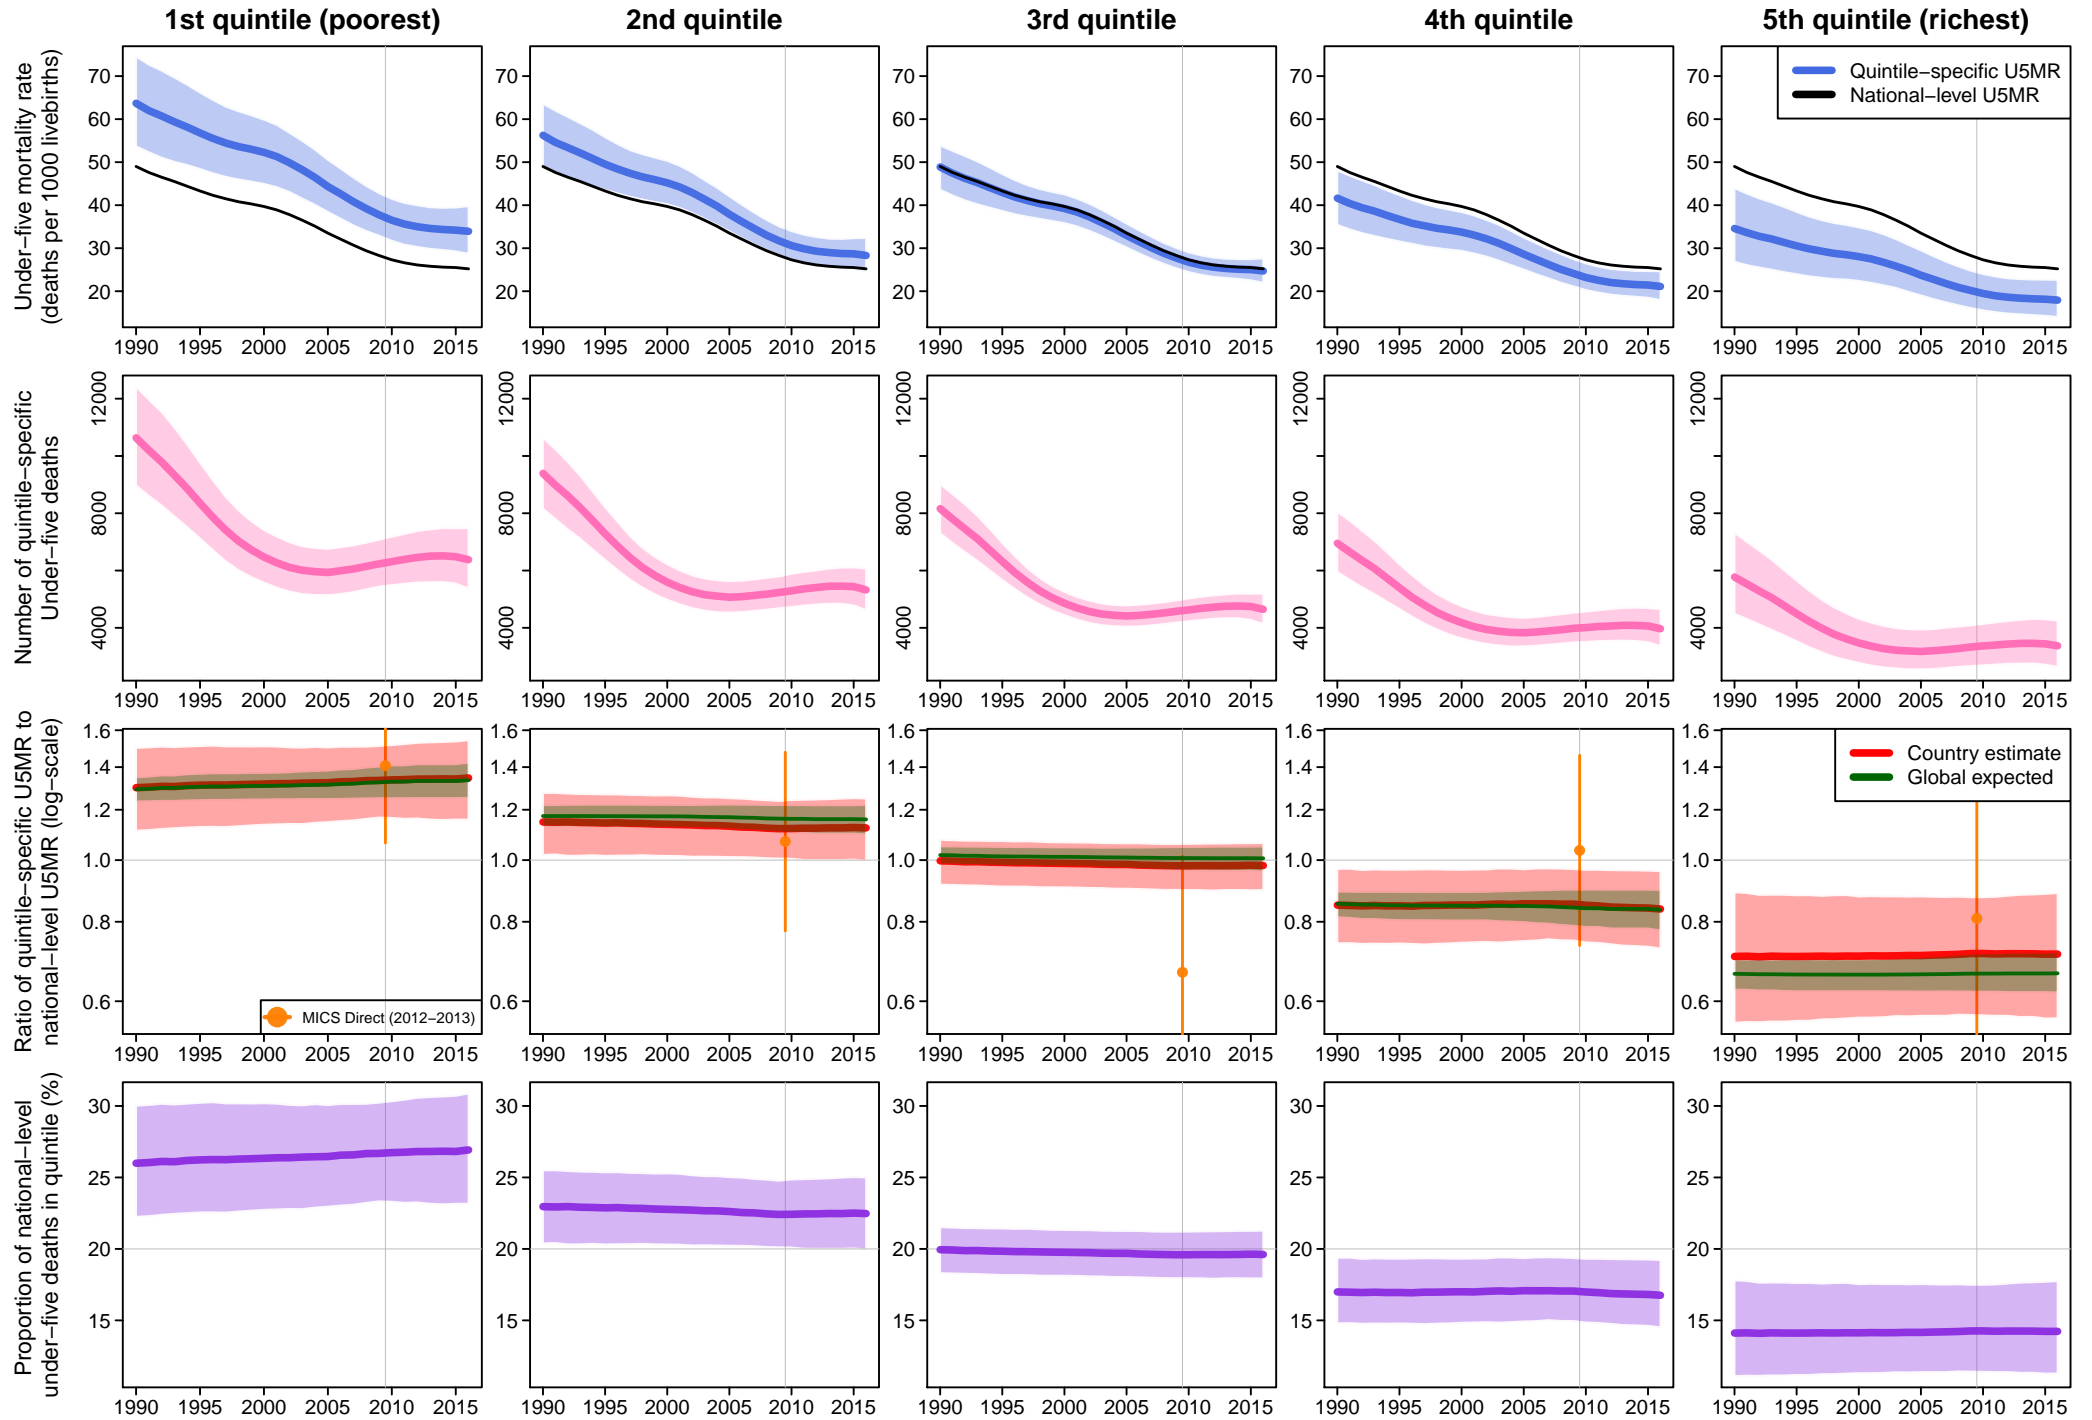



# Angola

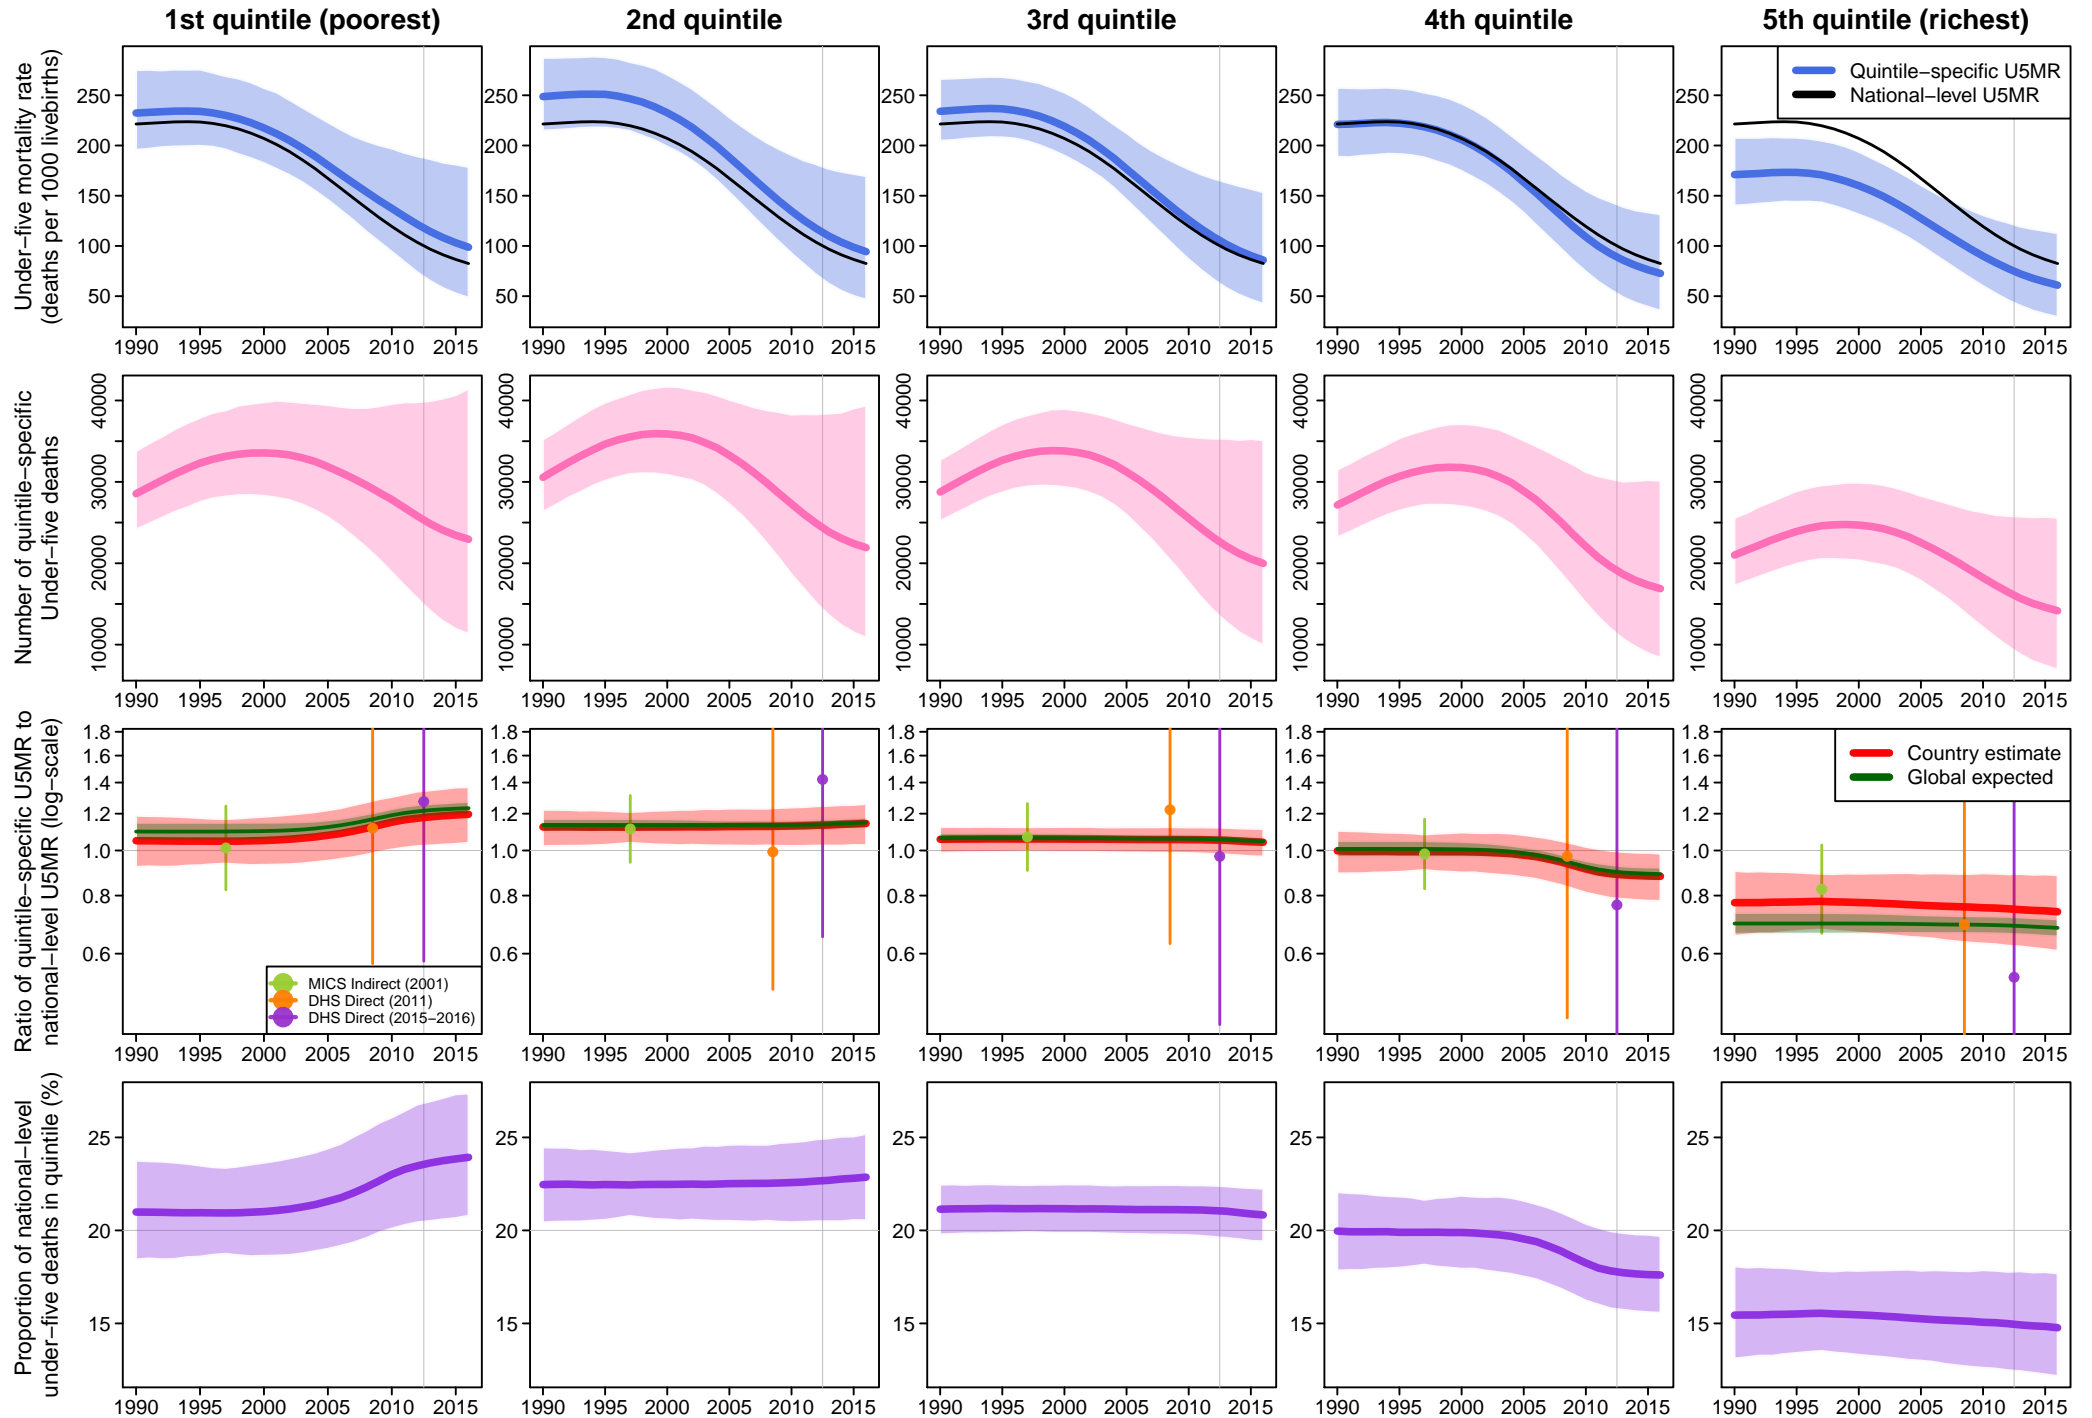

# Armenia

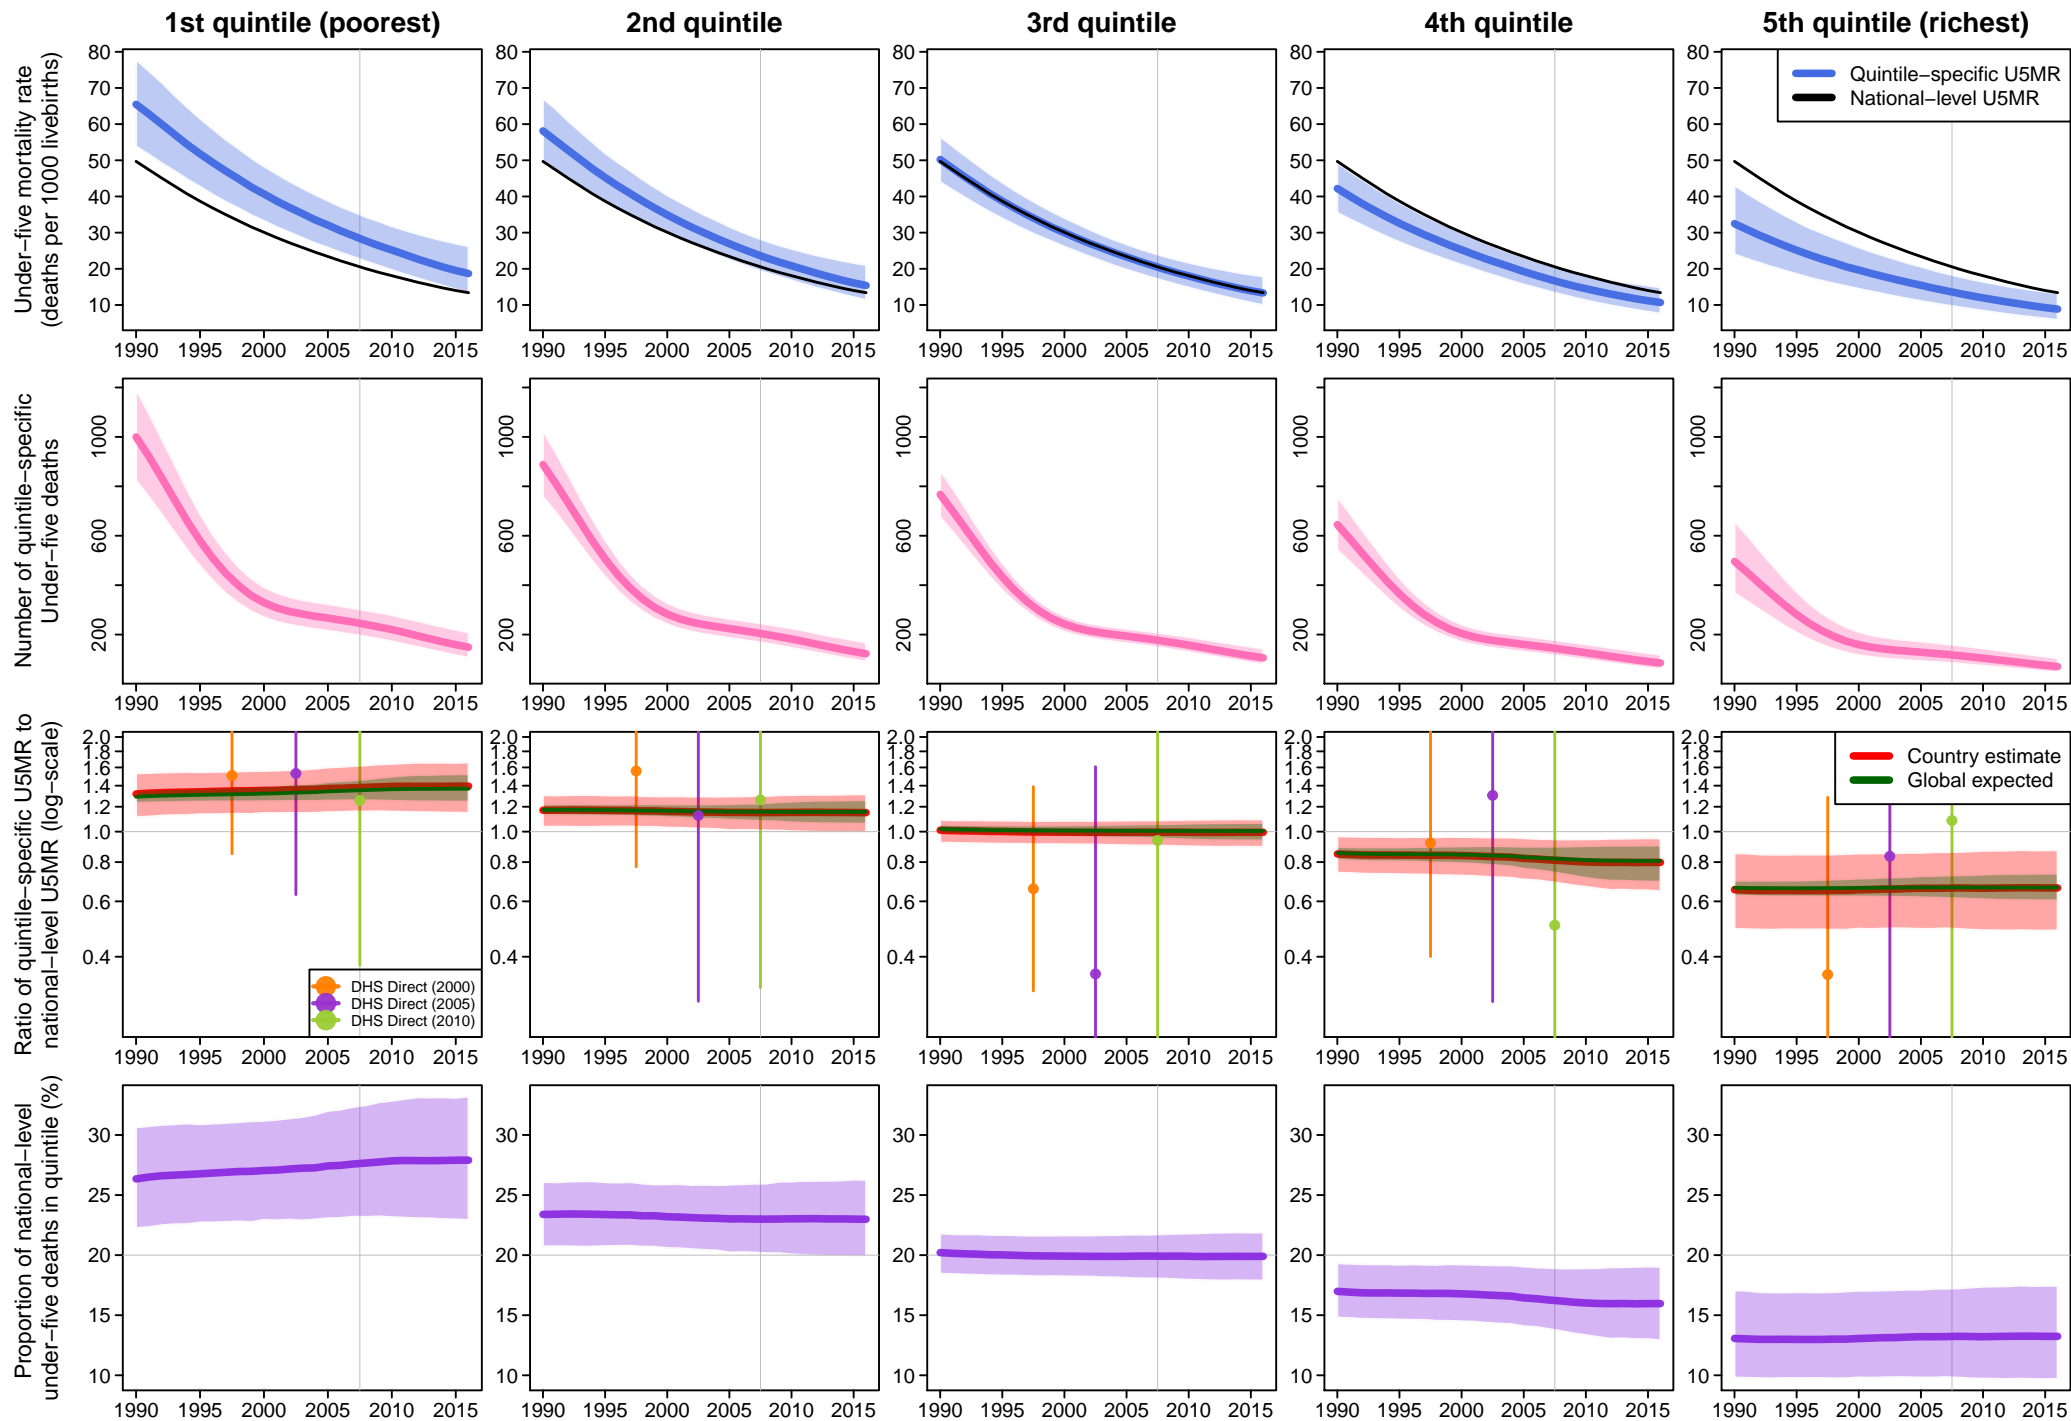

# Azerbaijan

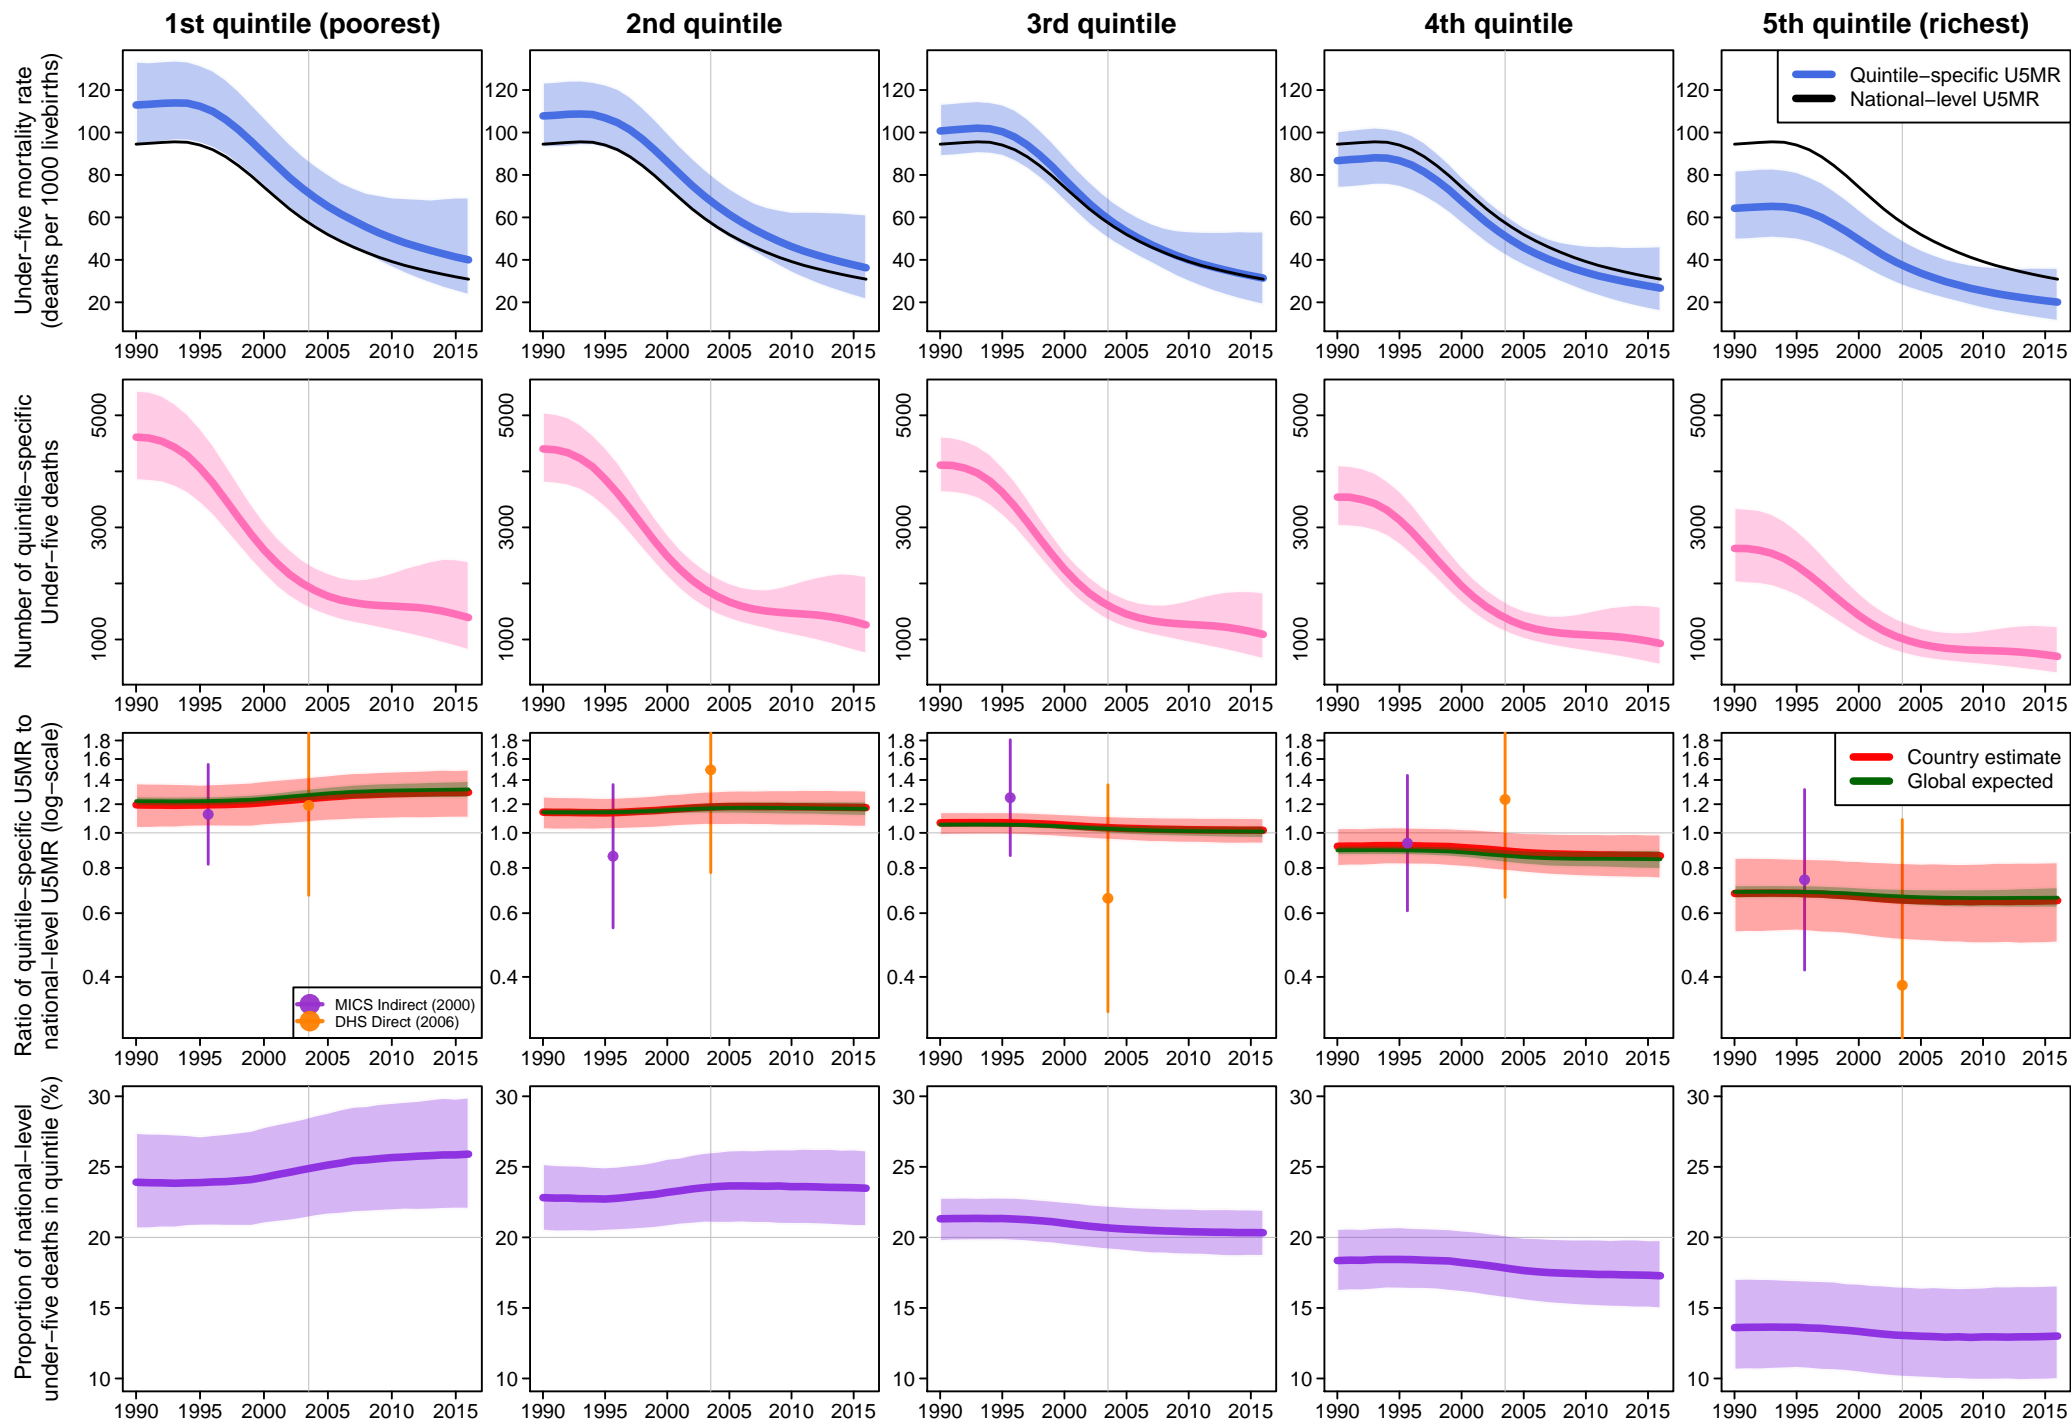

# Bangladesh

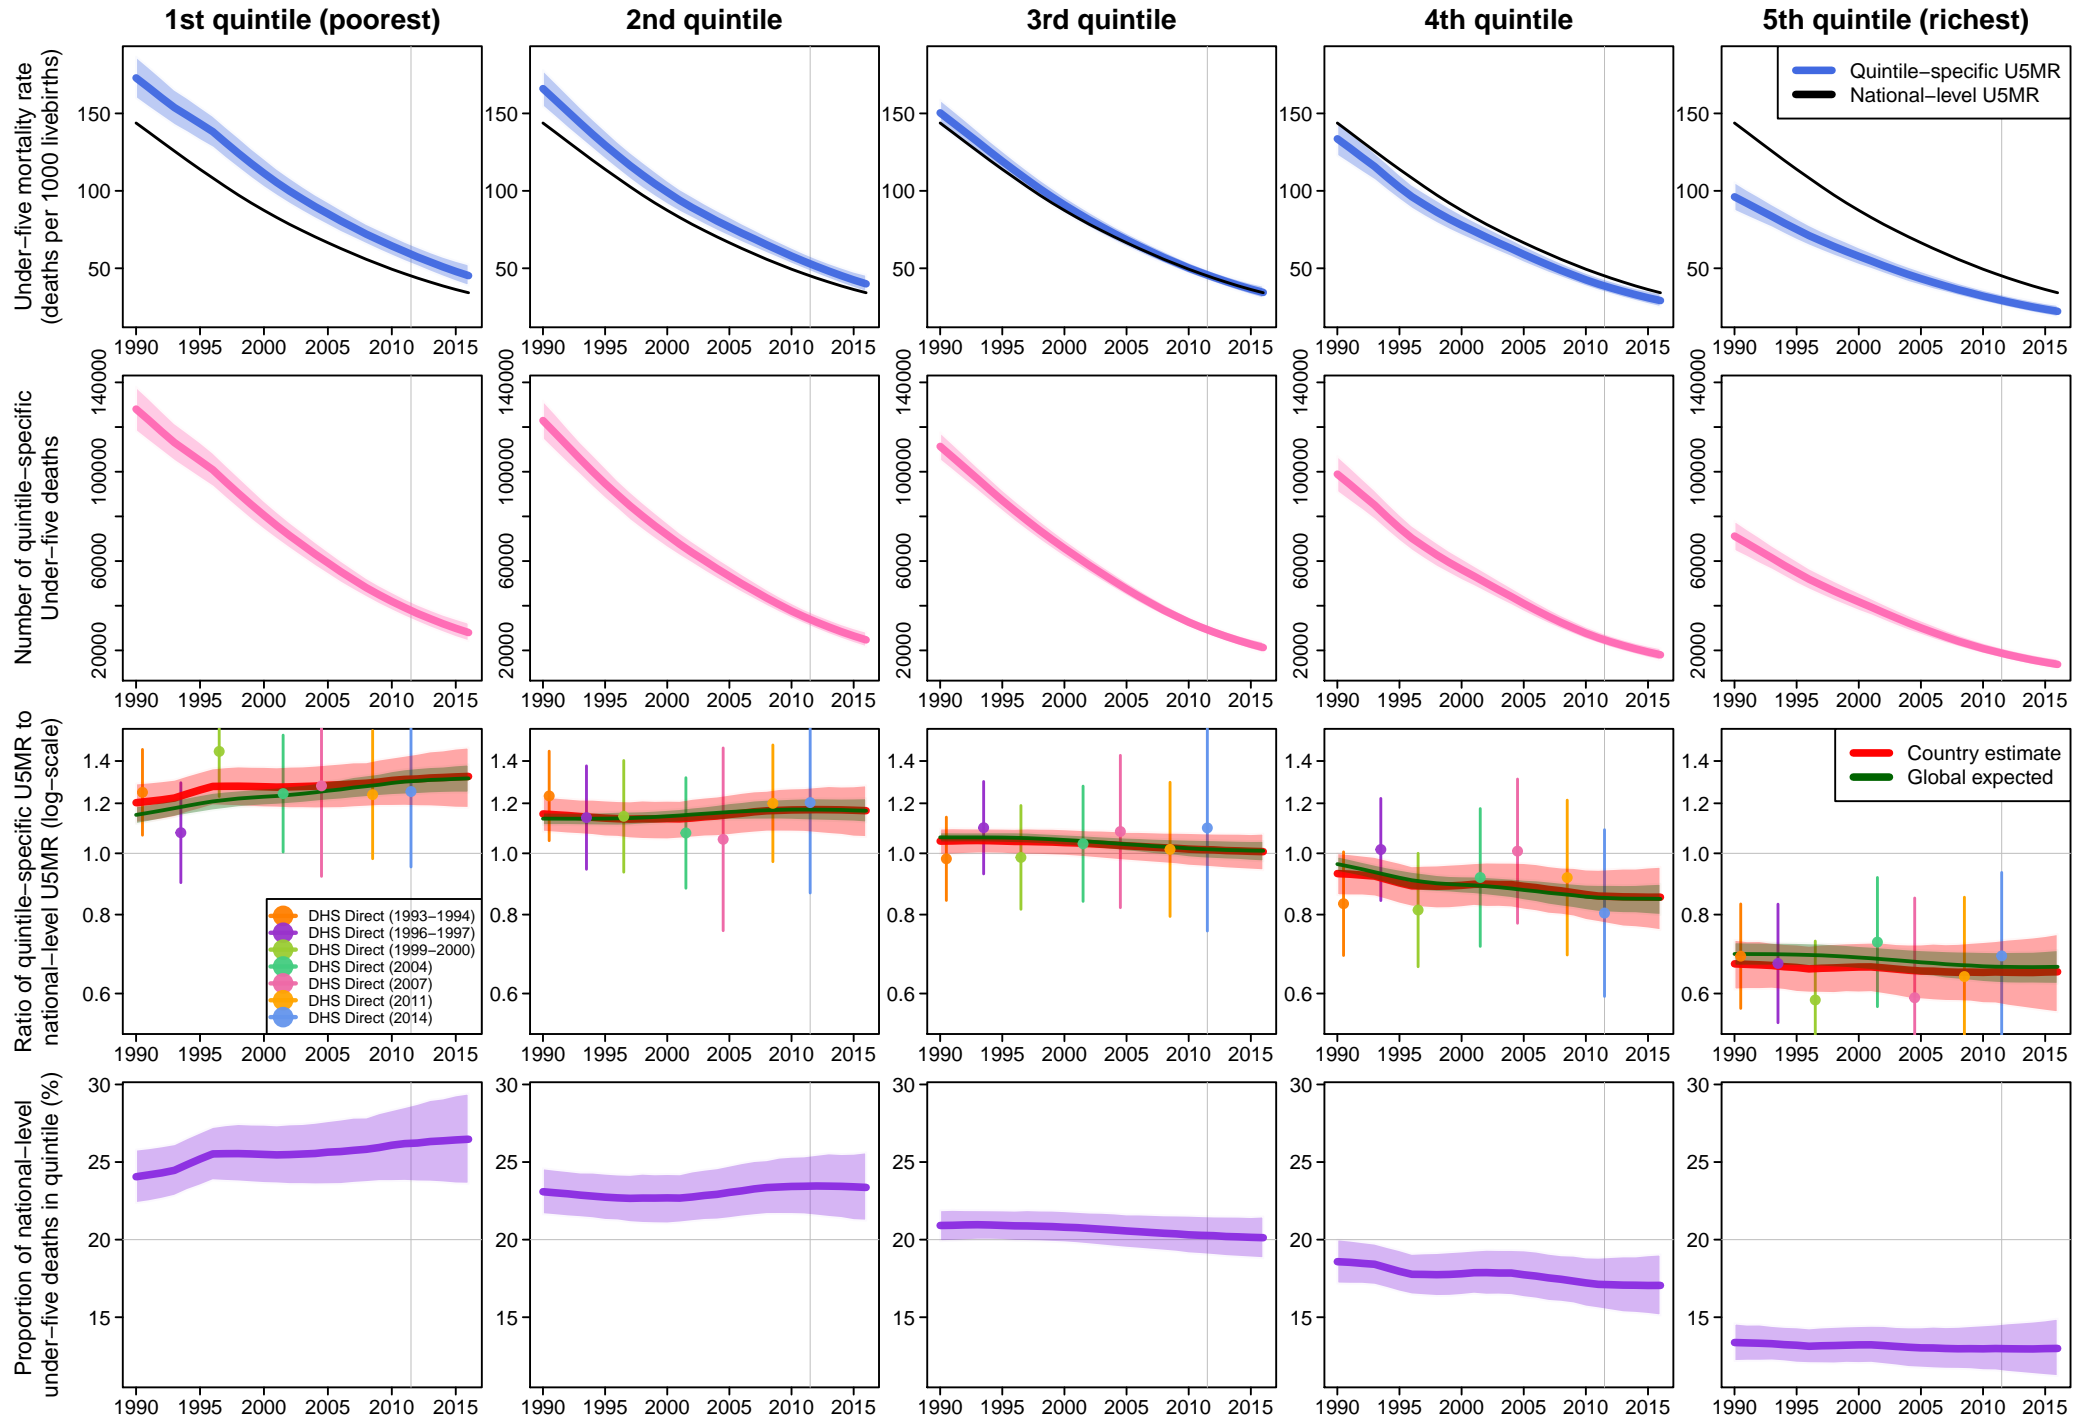

# Belarus

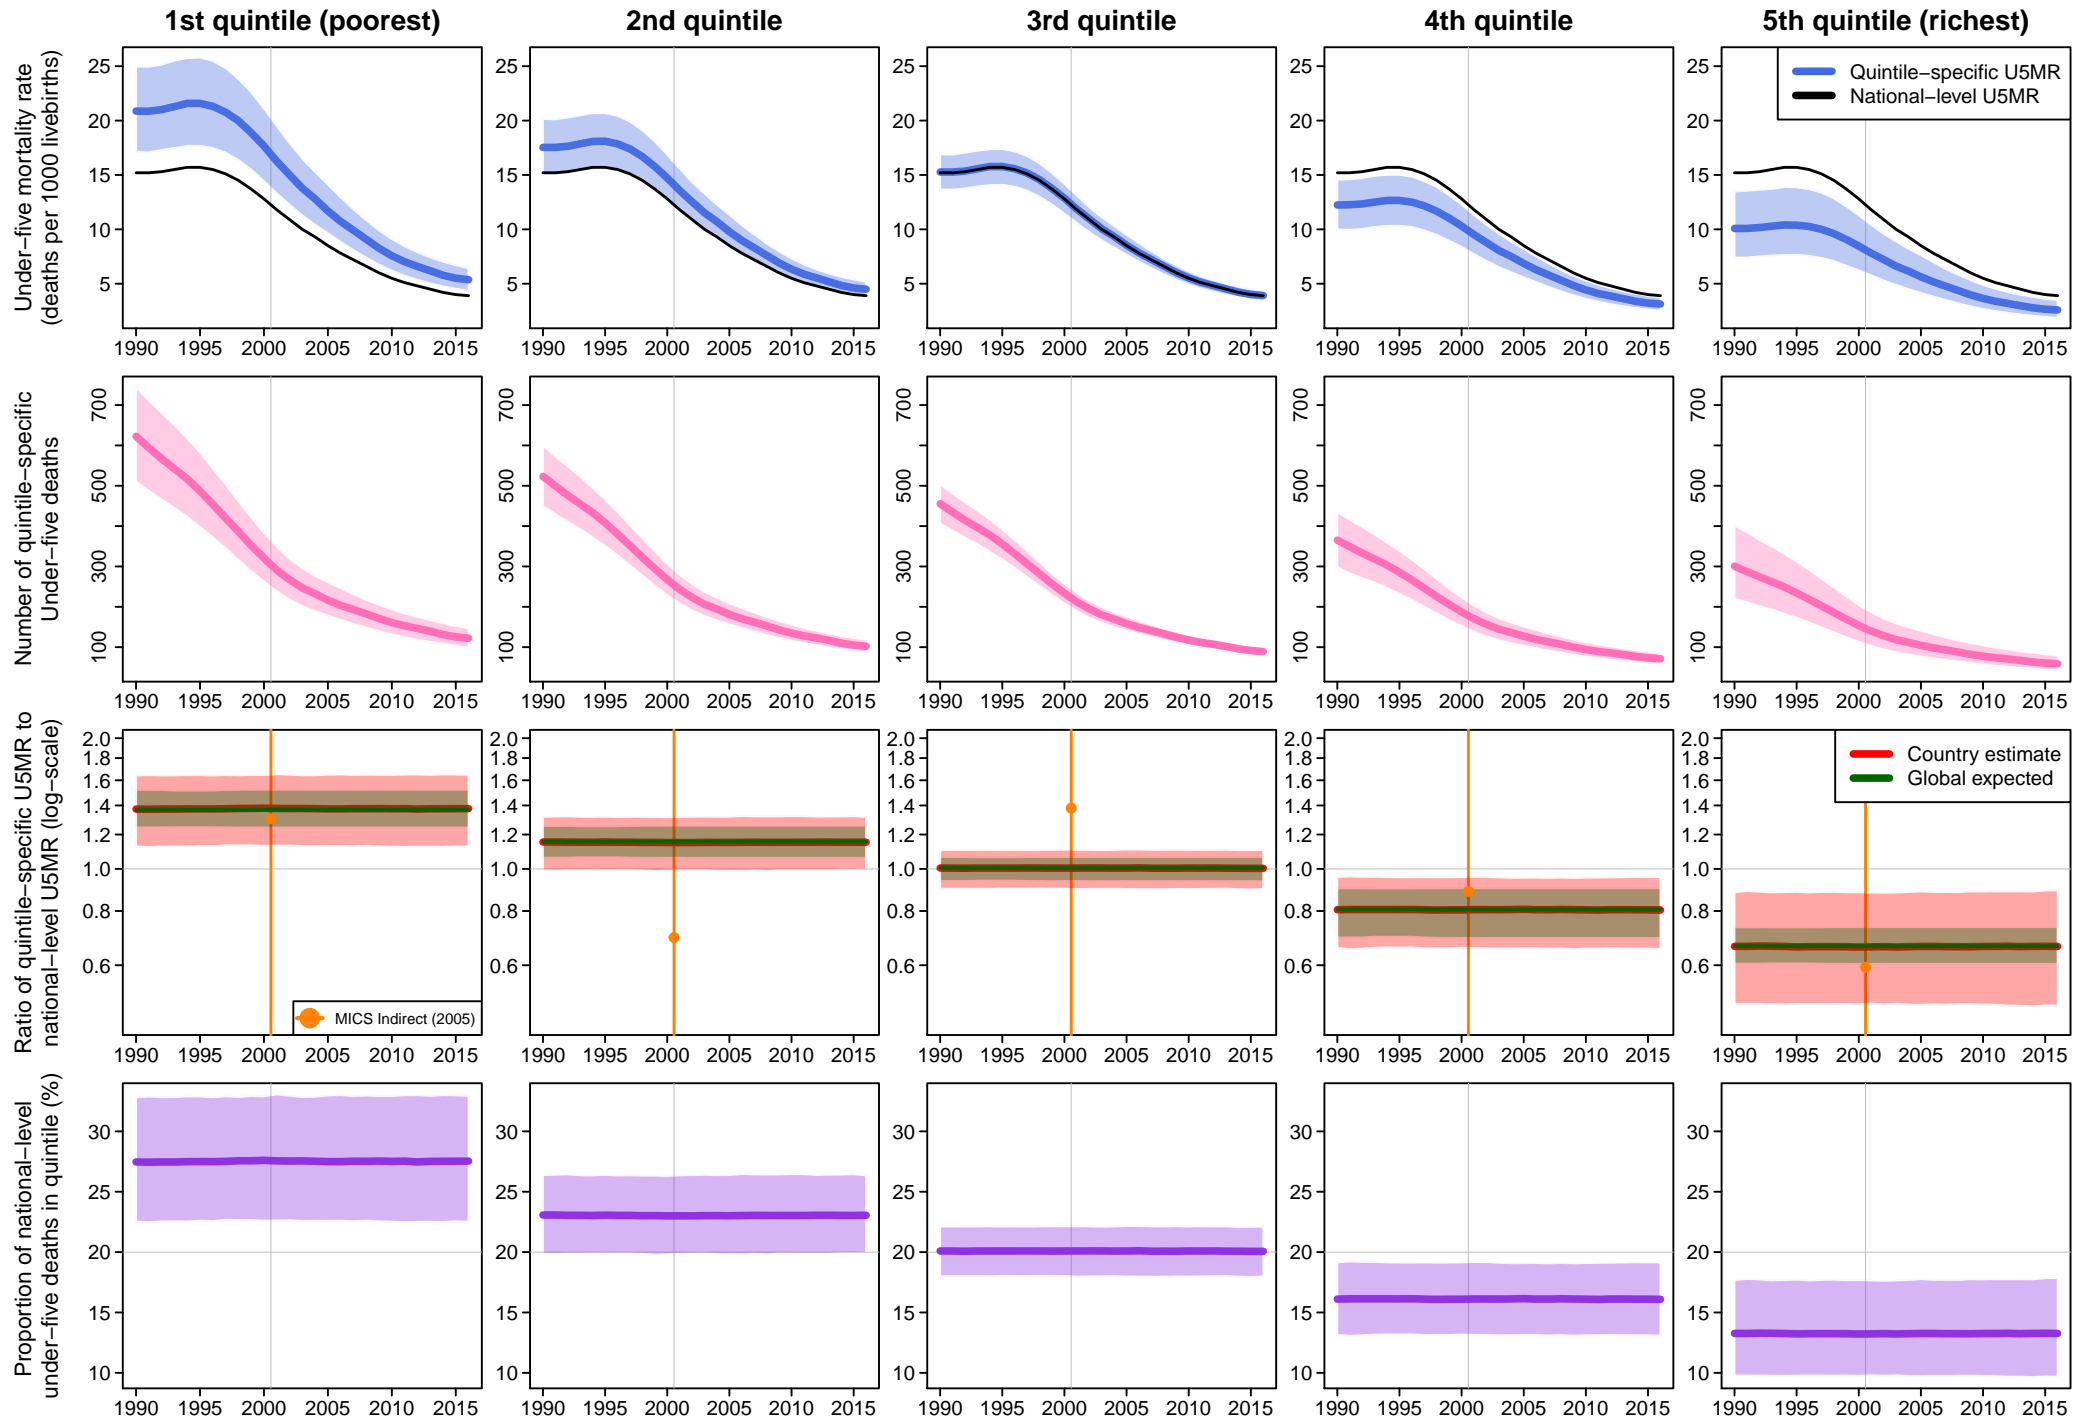

# Belize

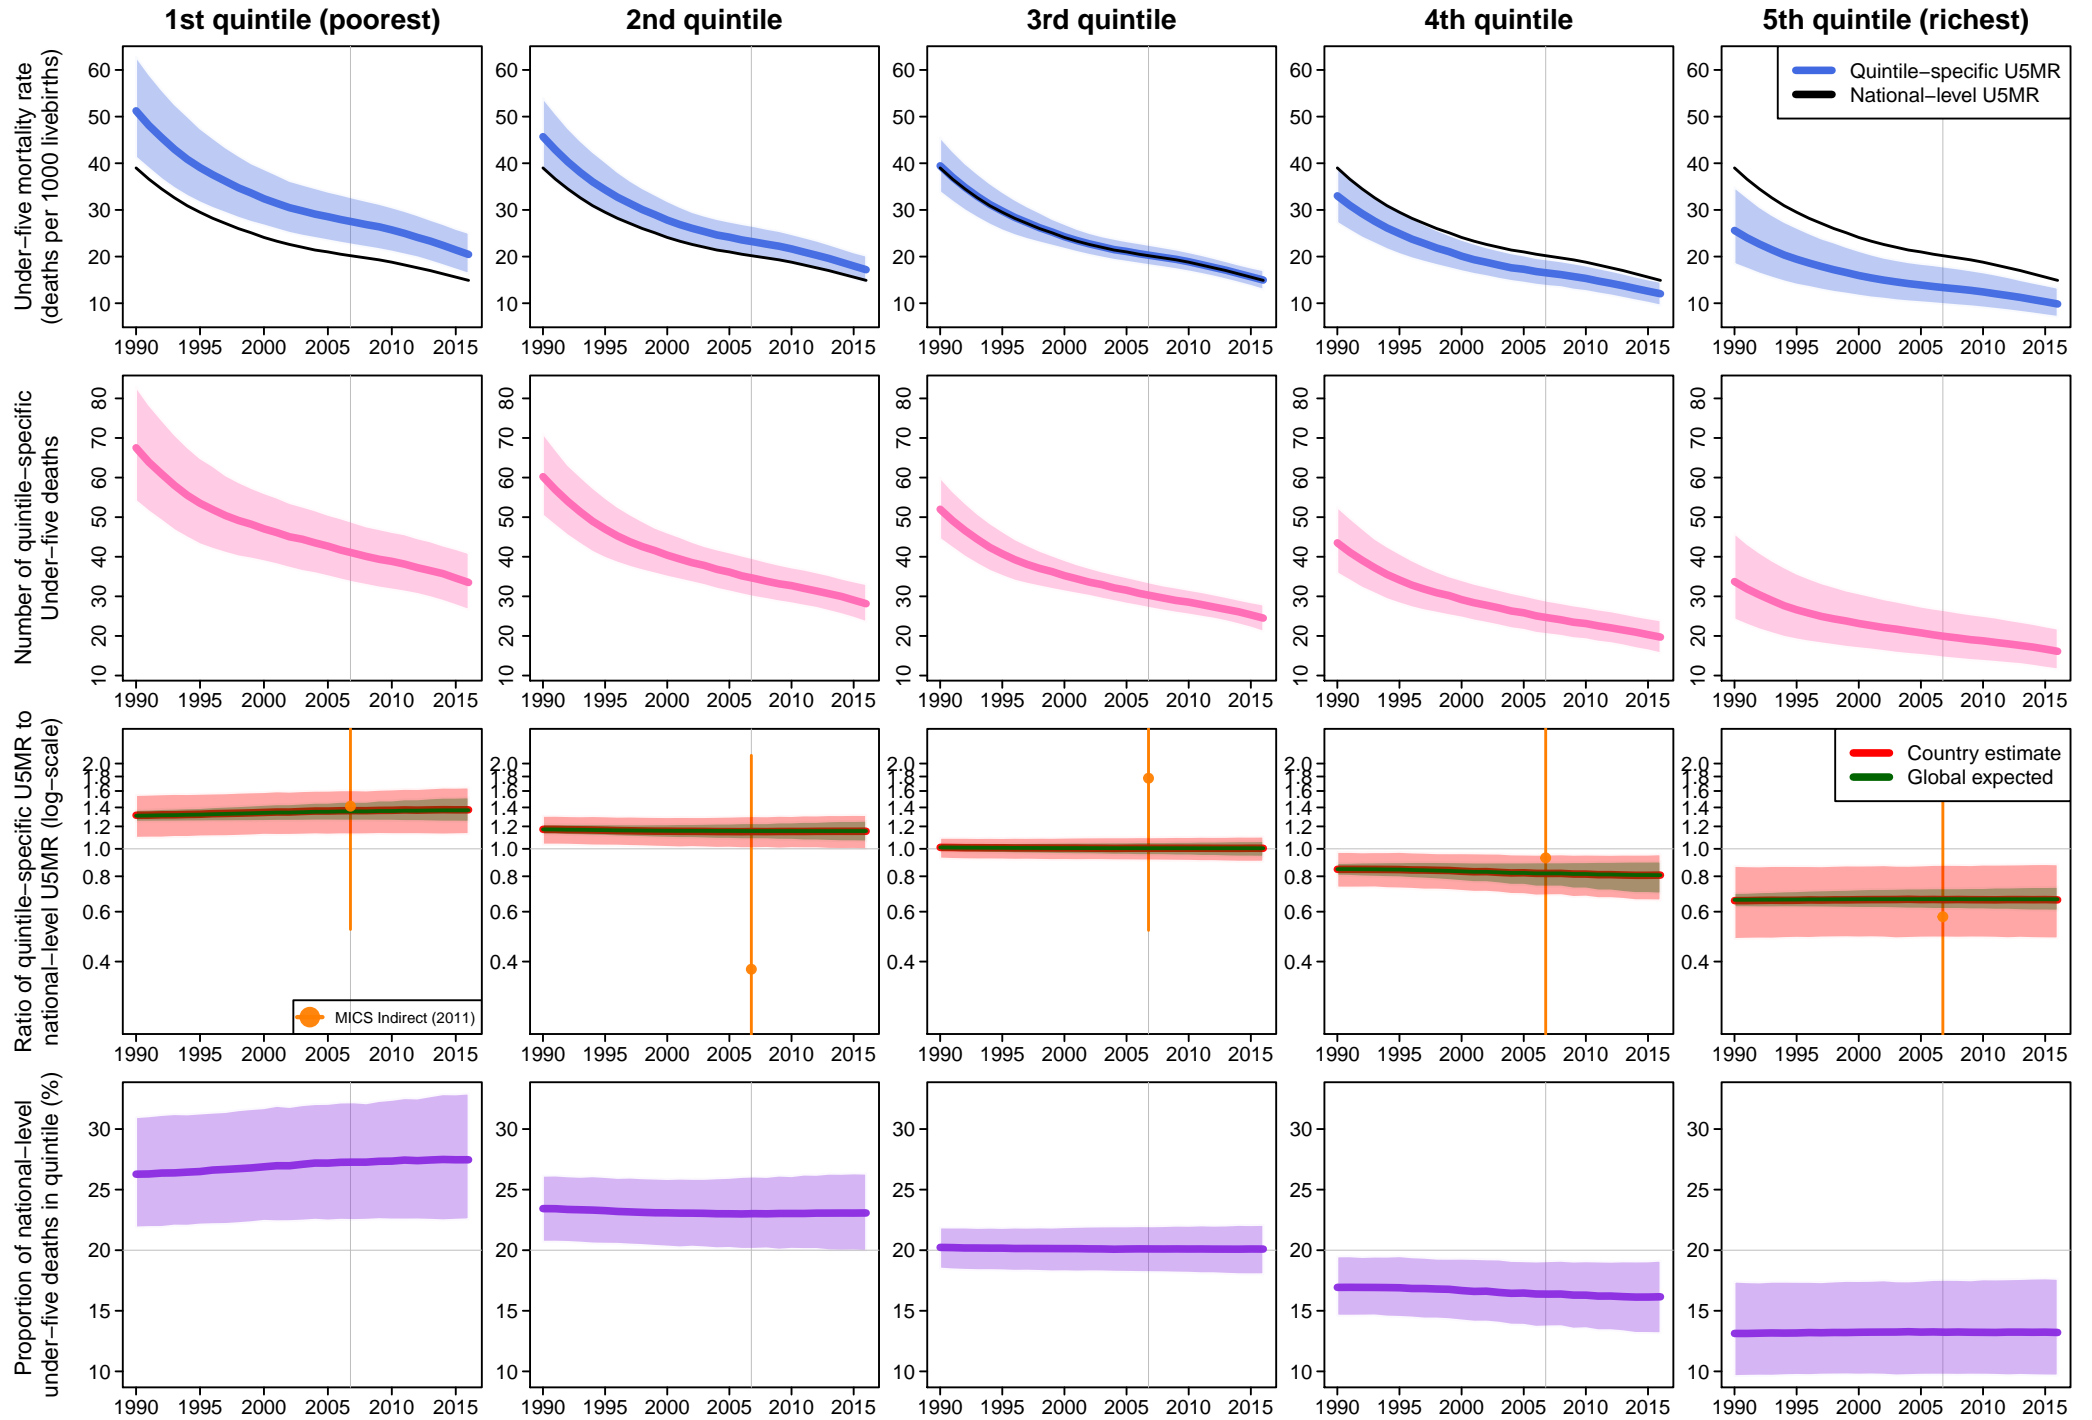

# Benin

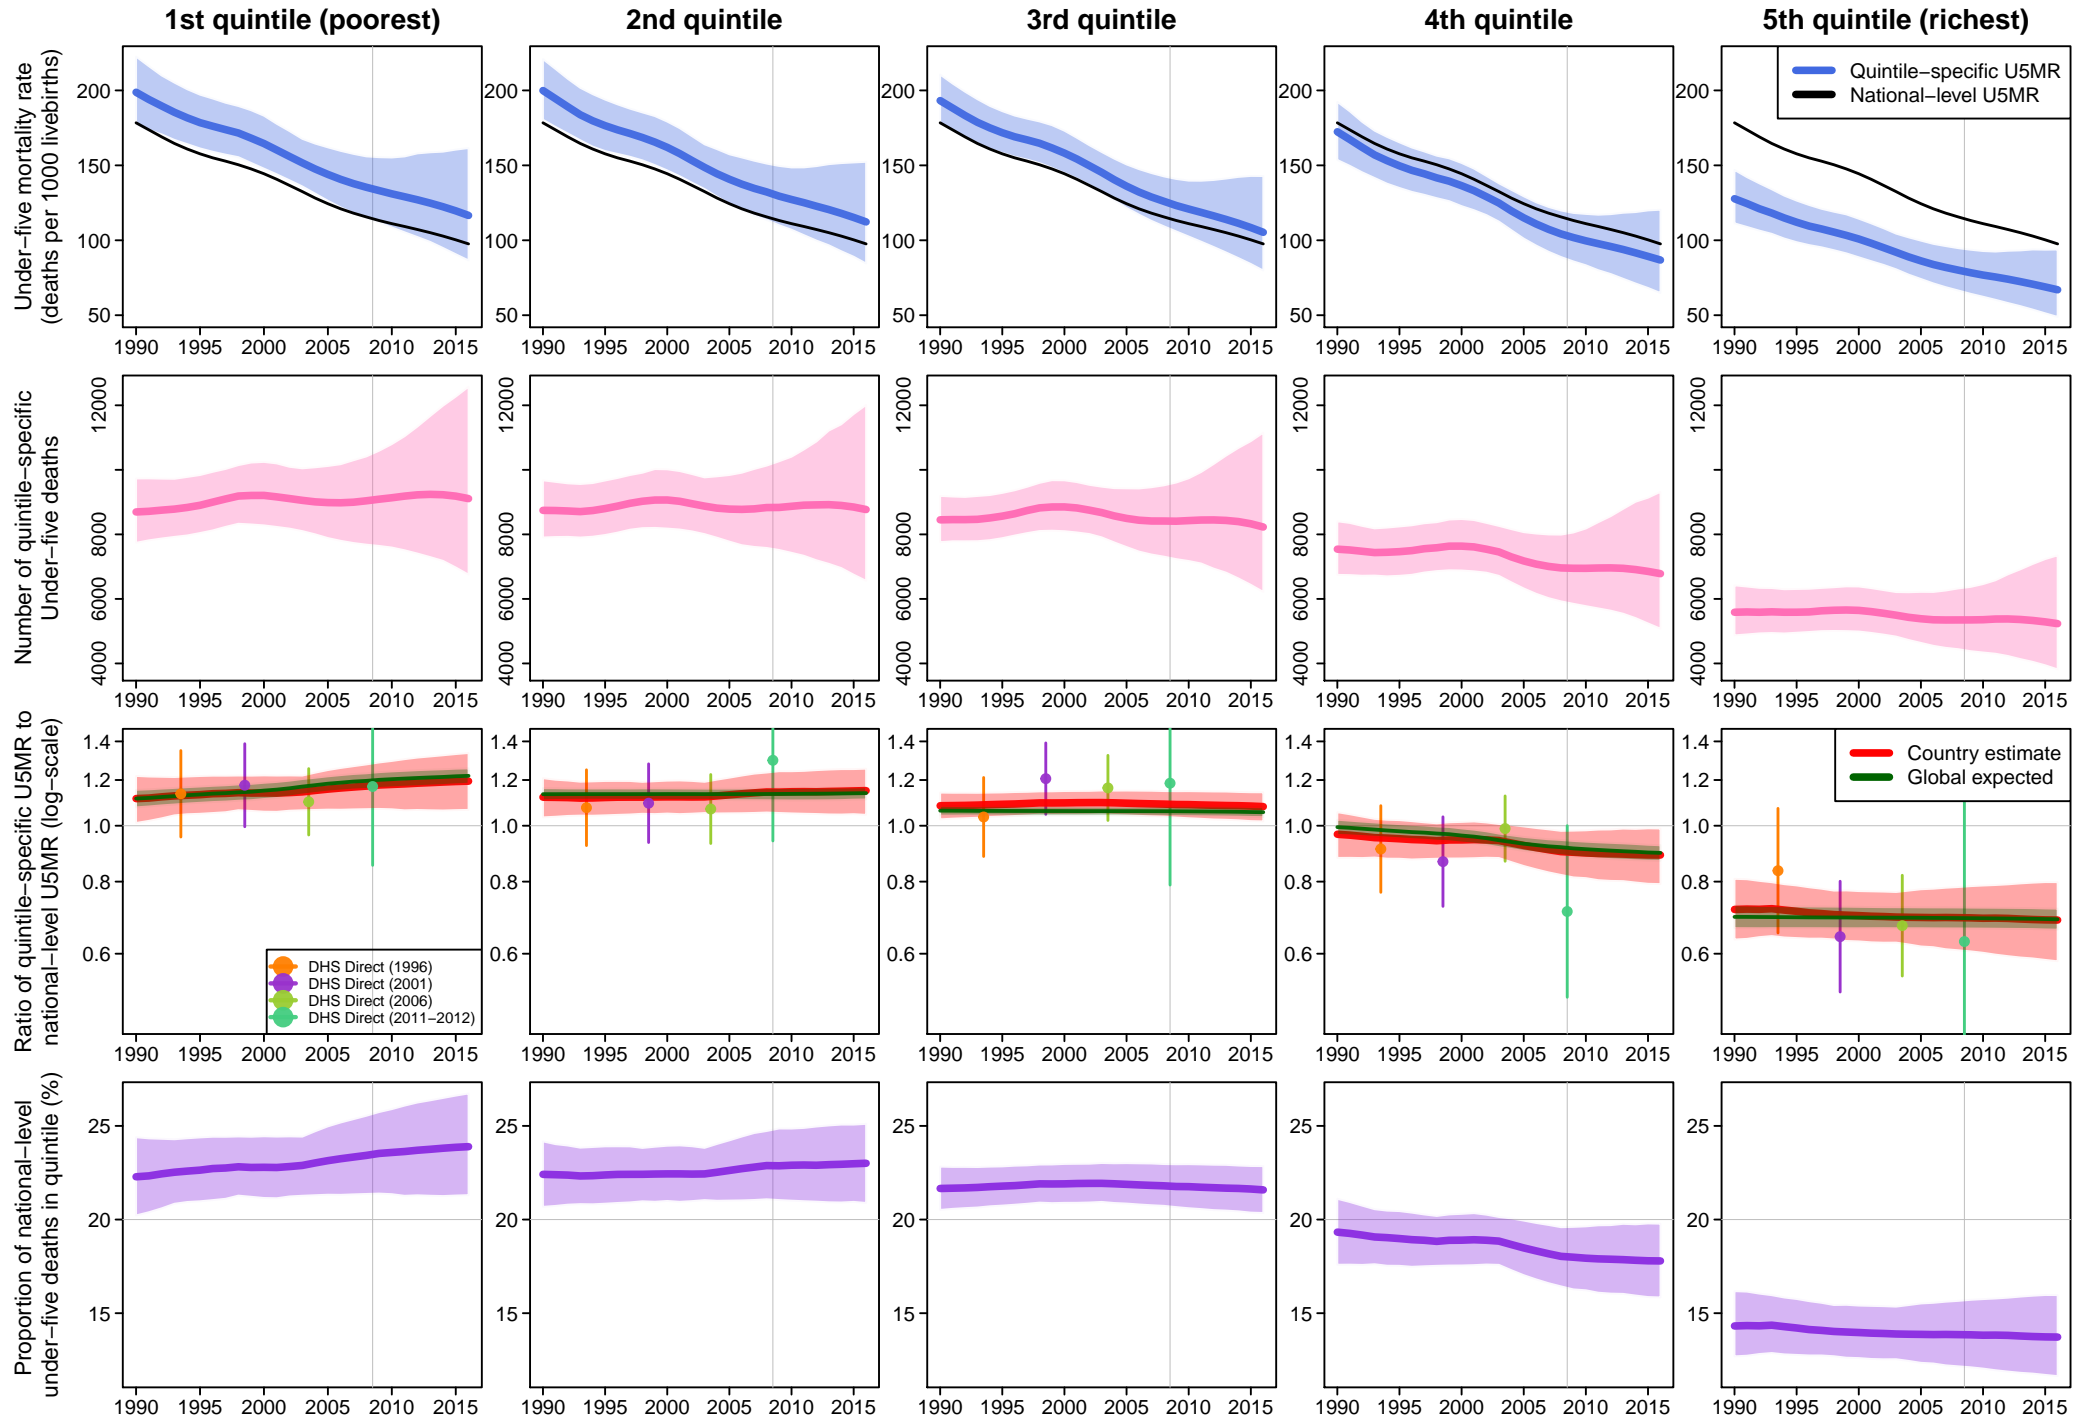

# Bhutan

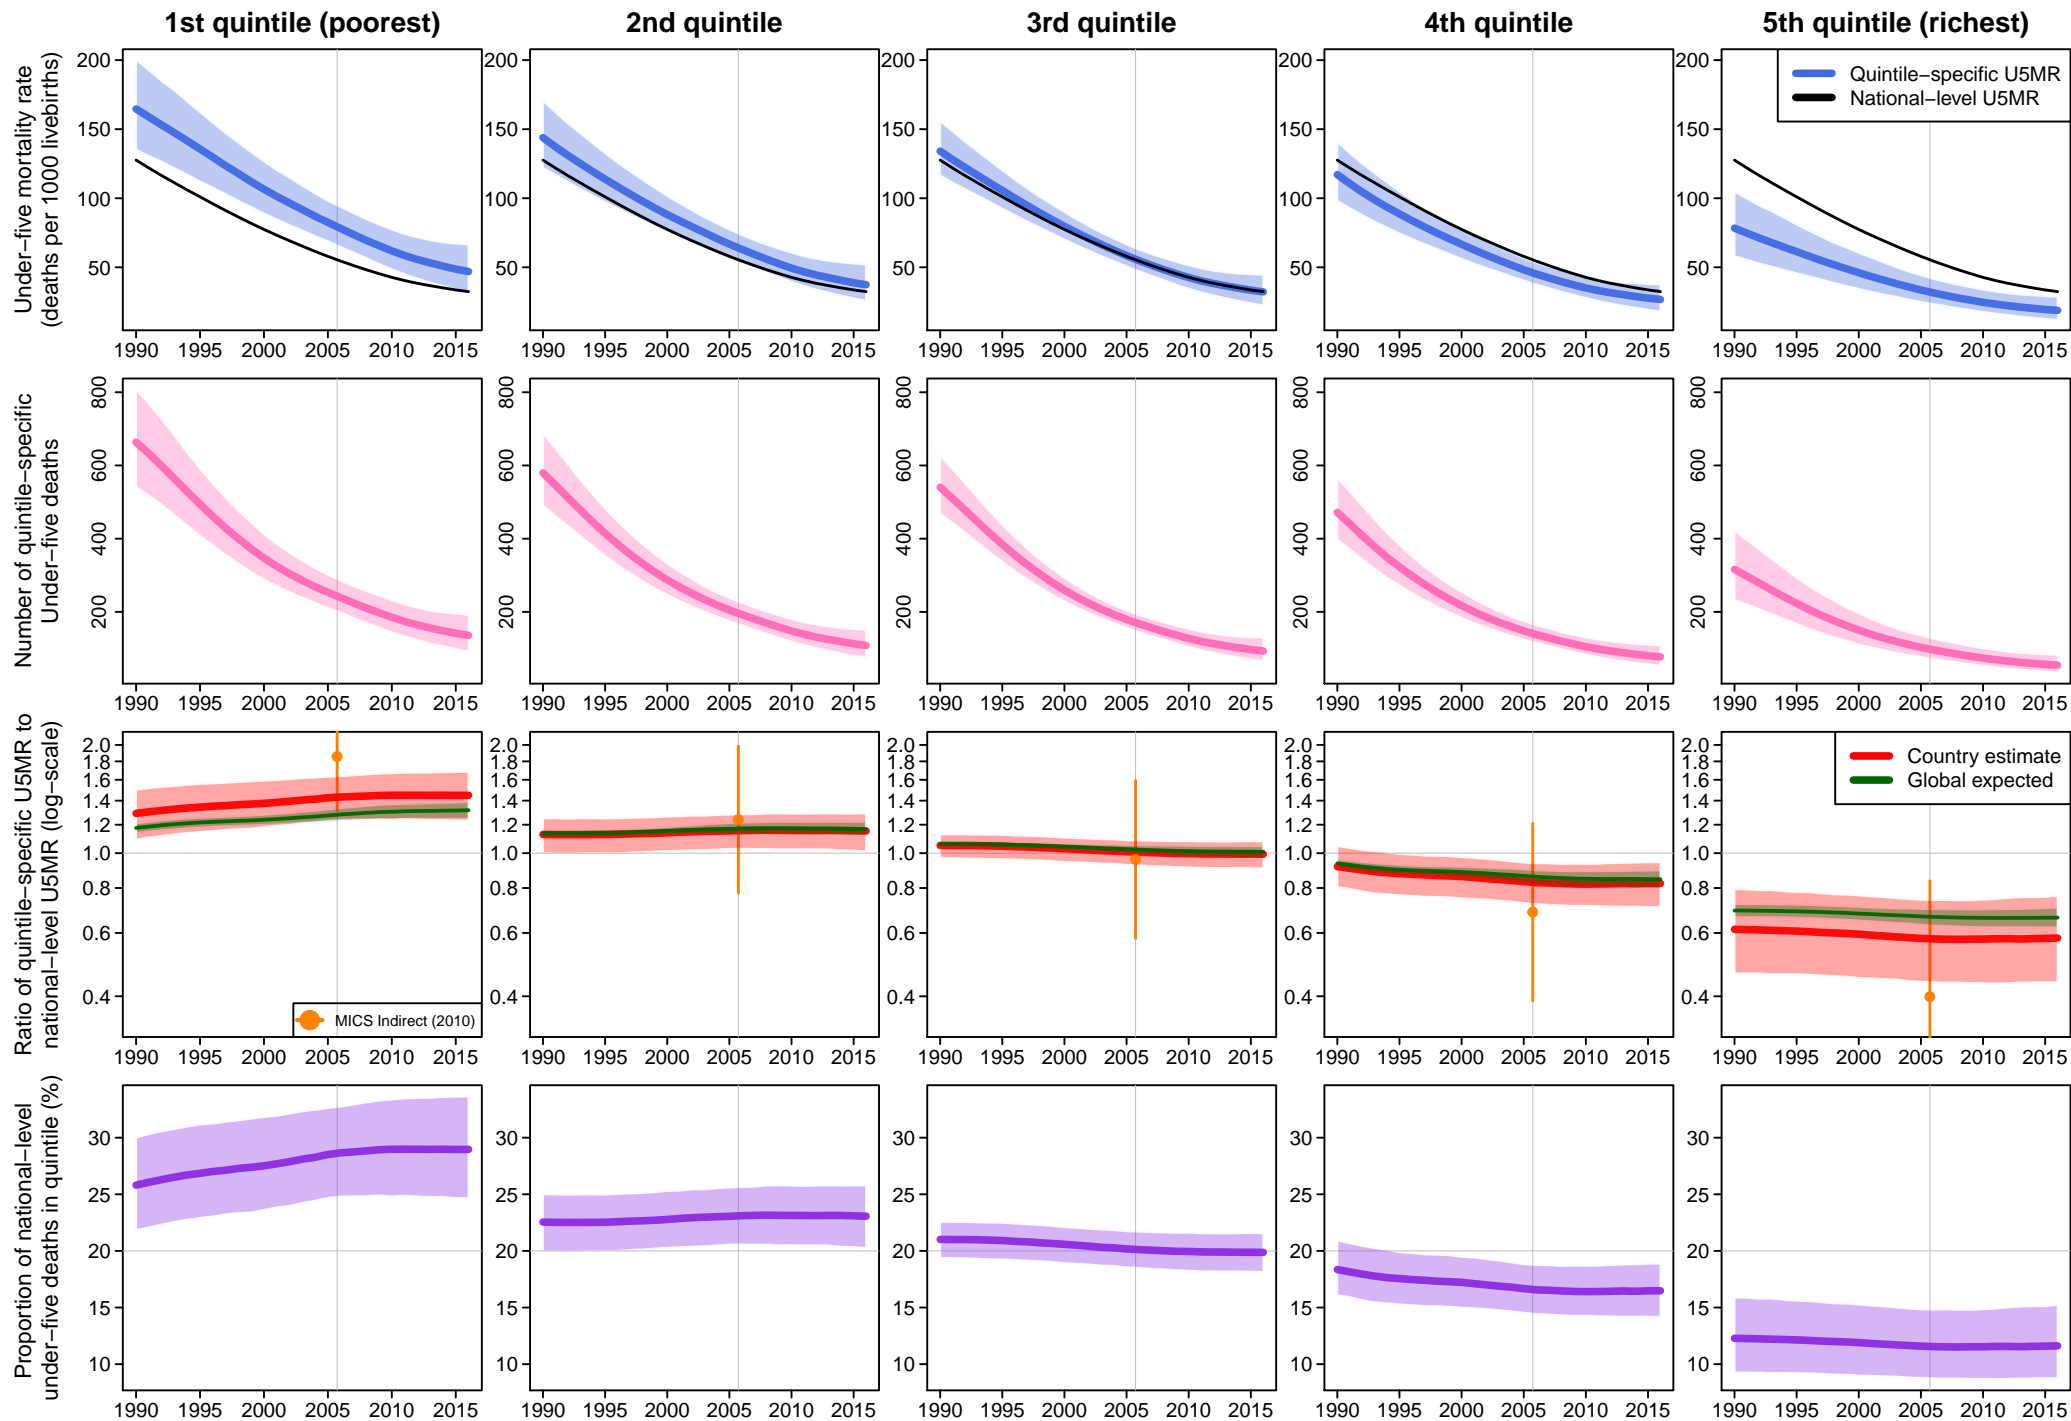



# Bolivia (Plurinational State of)

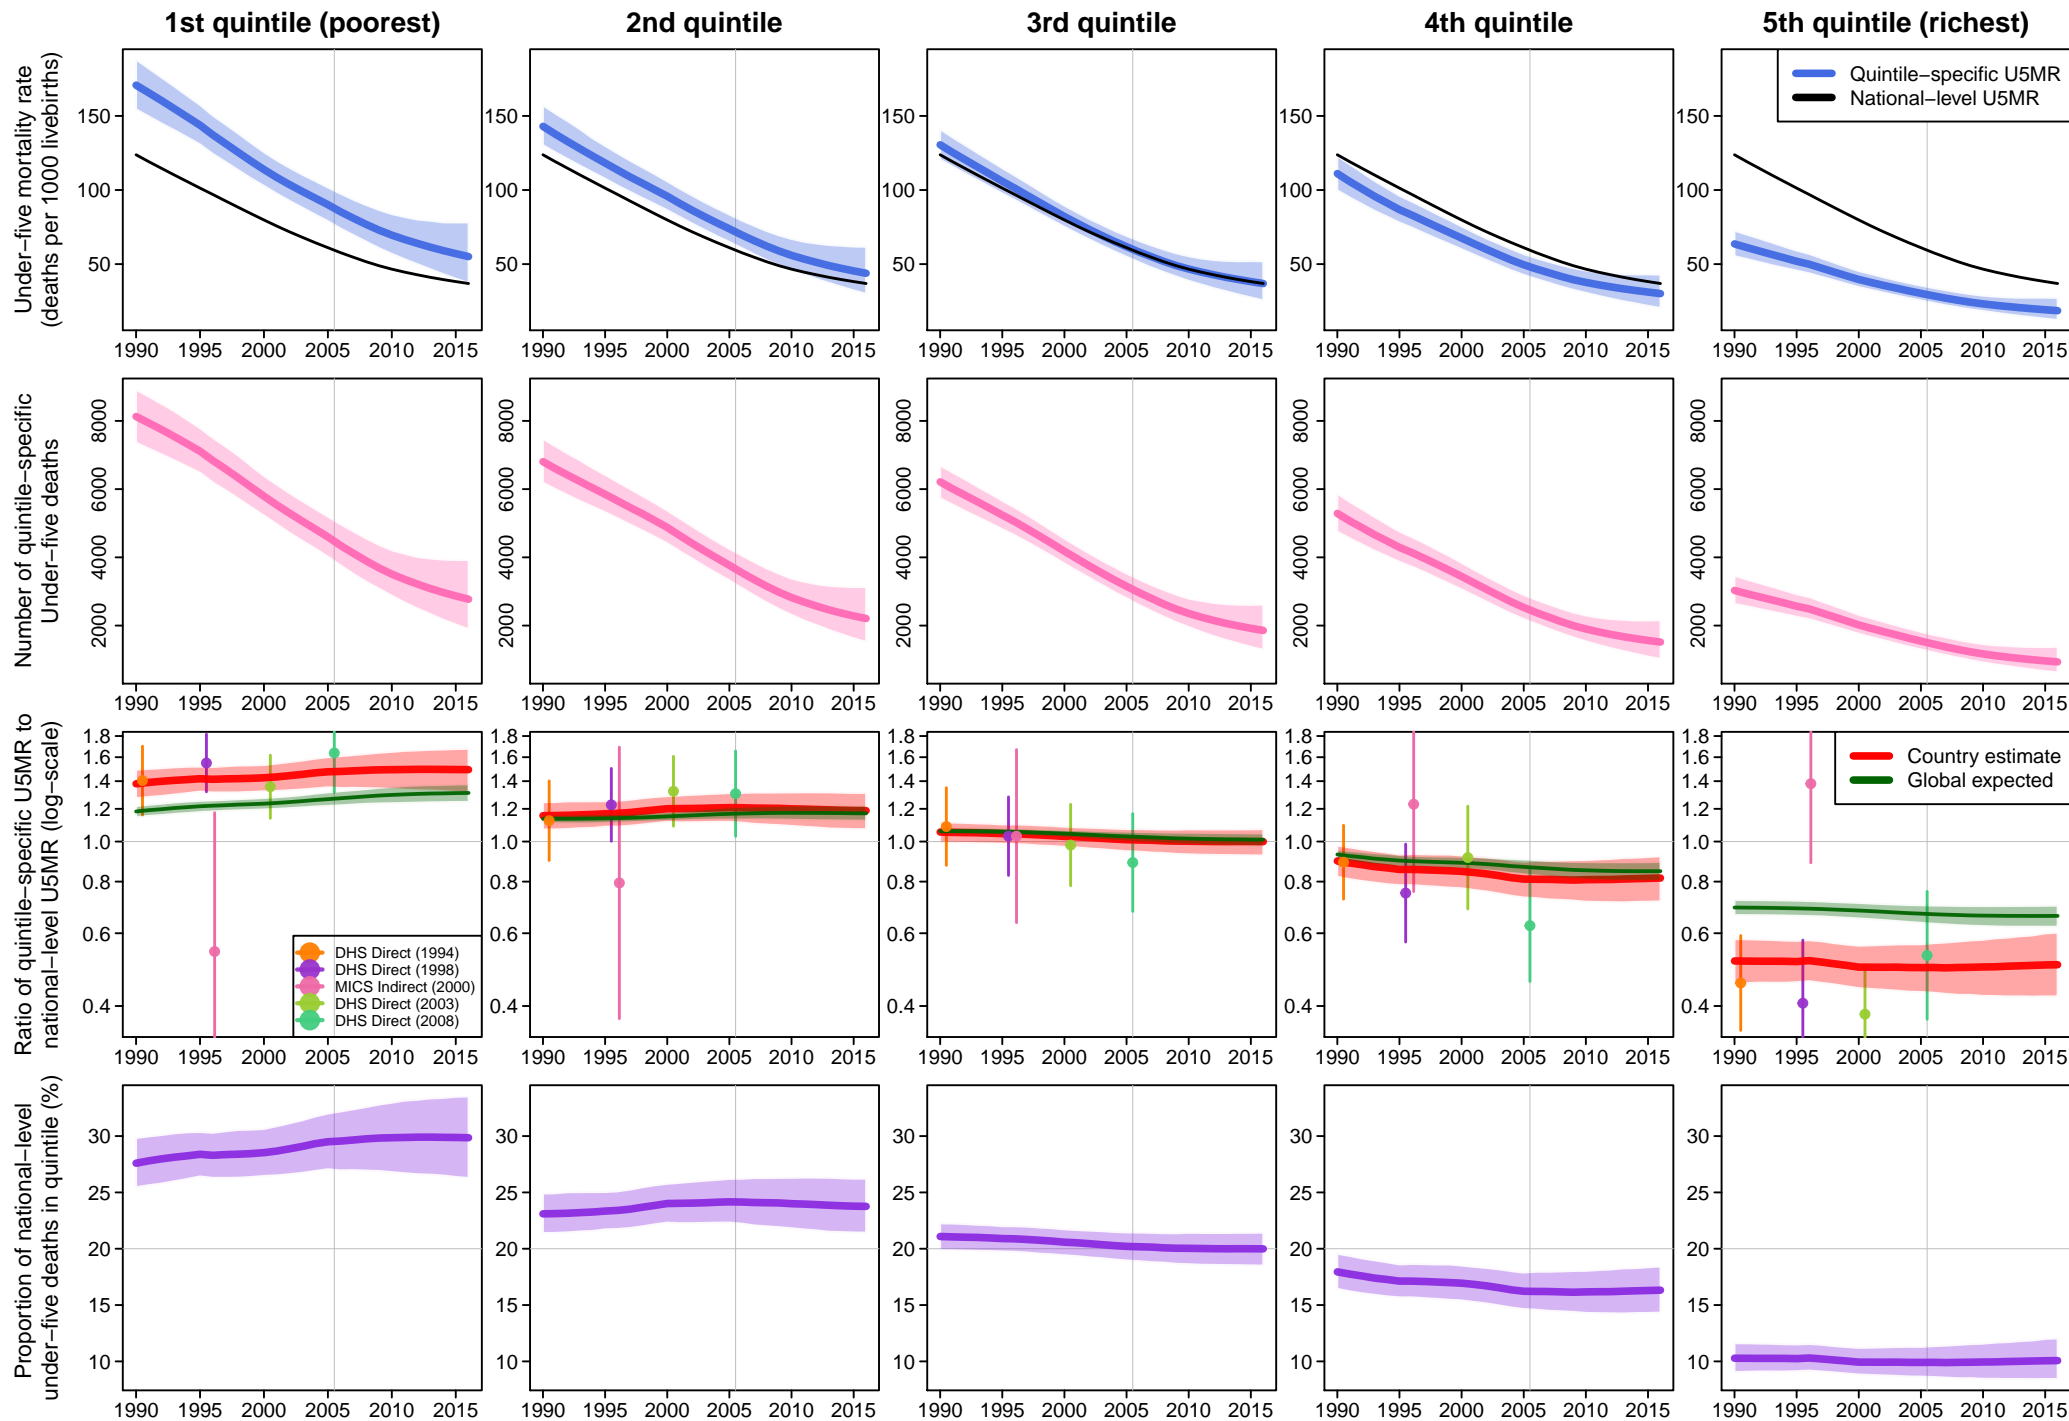

# Brazil

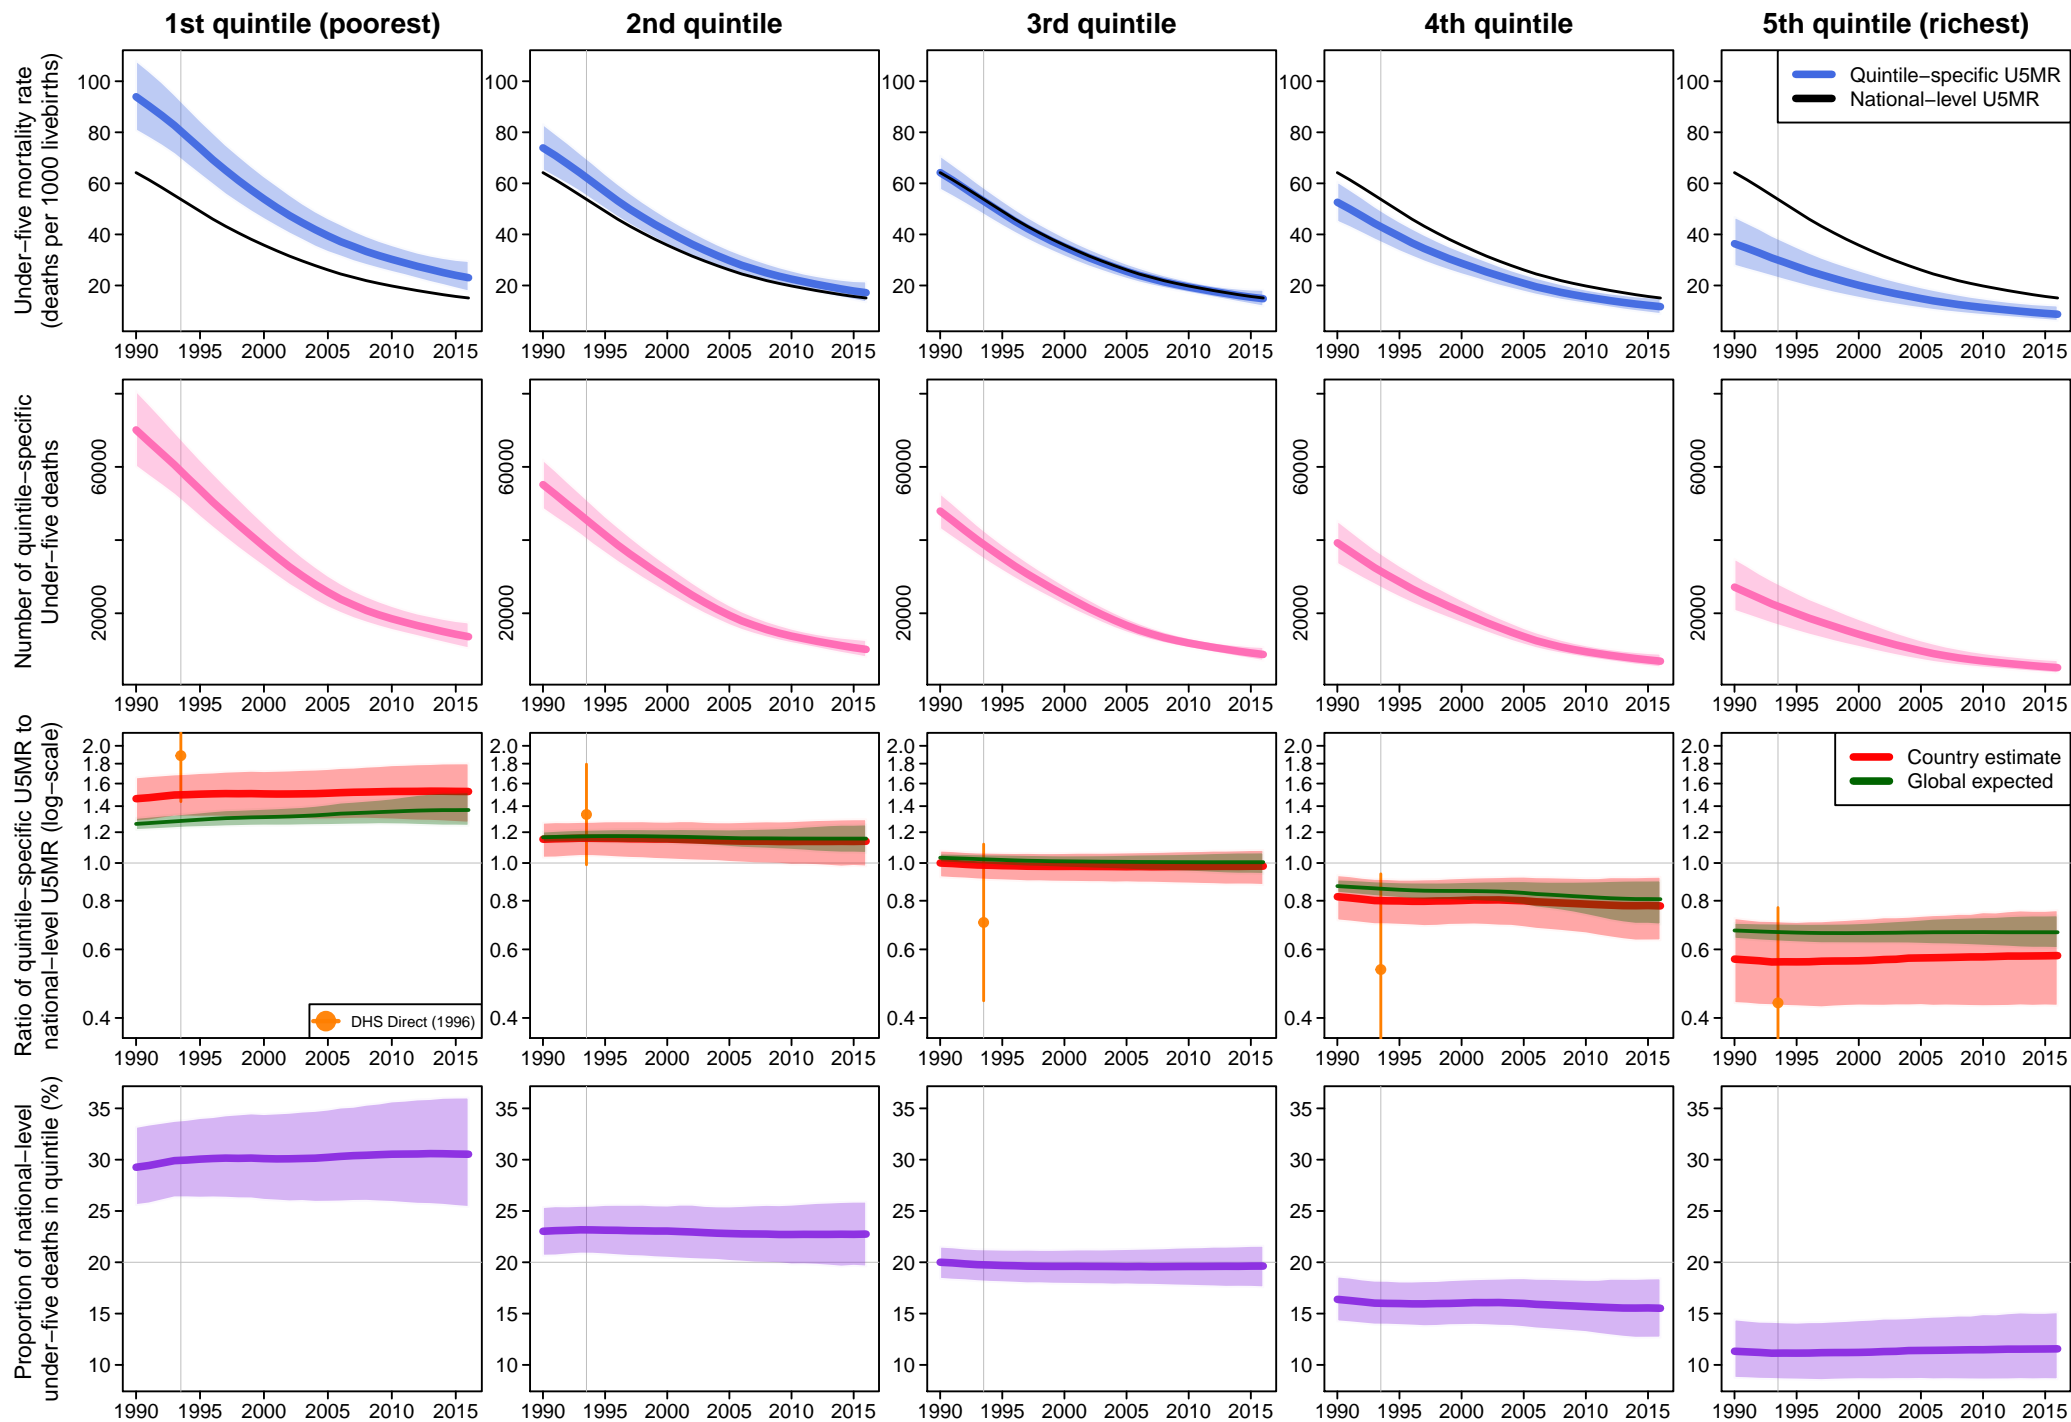

# Burkina Faso

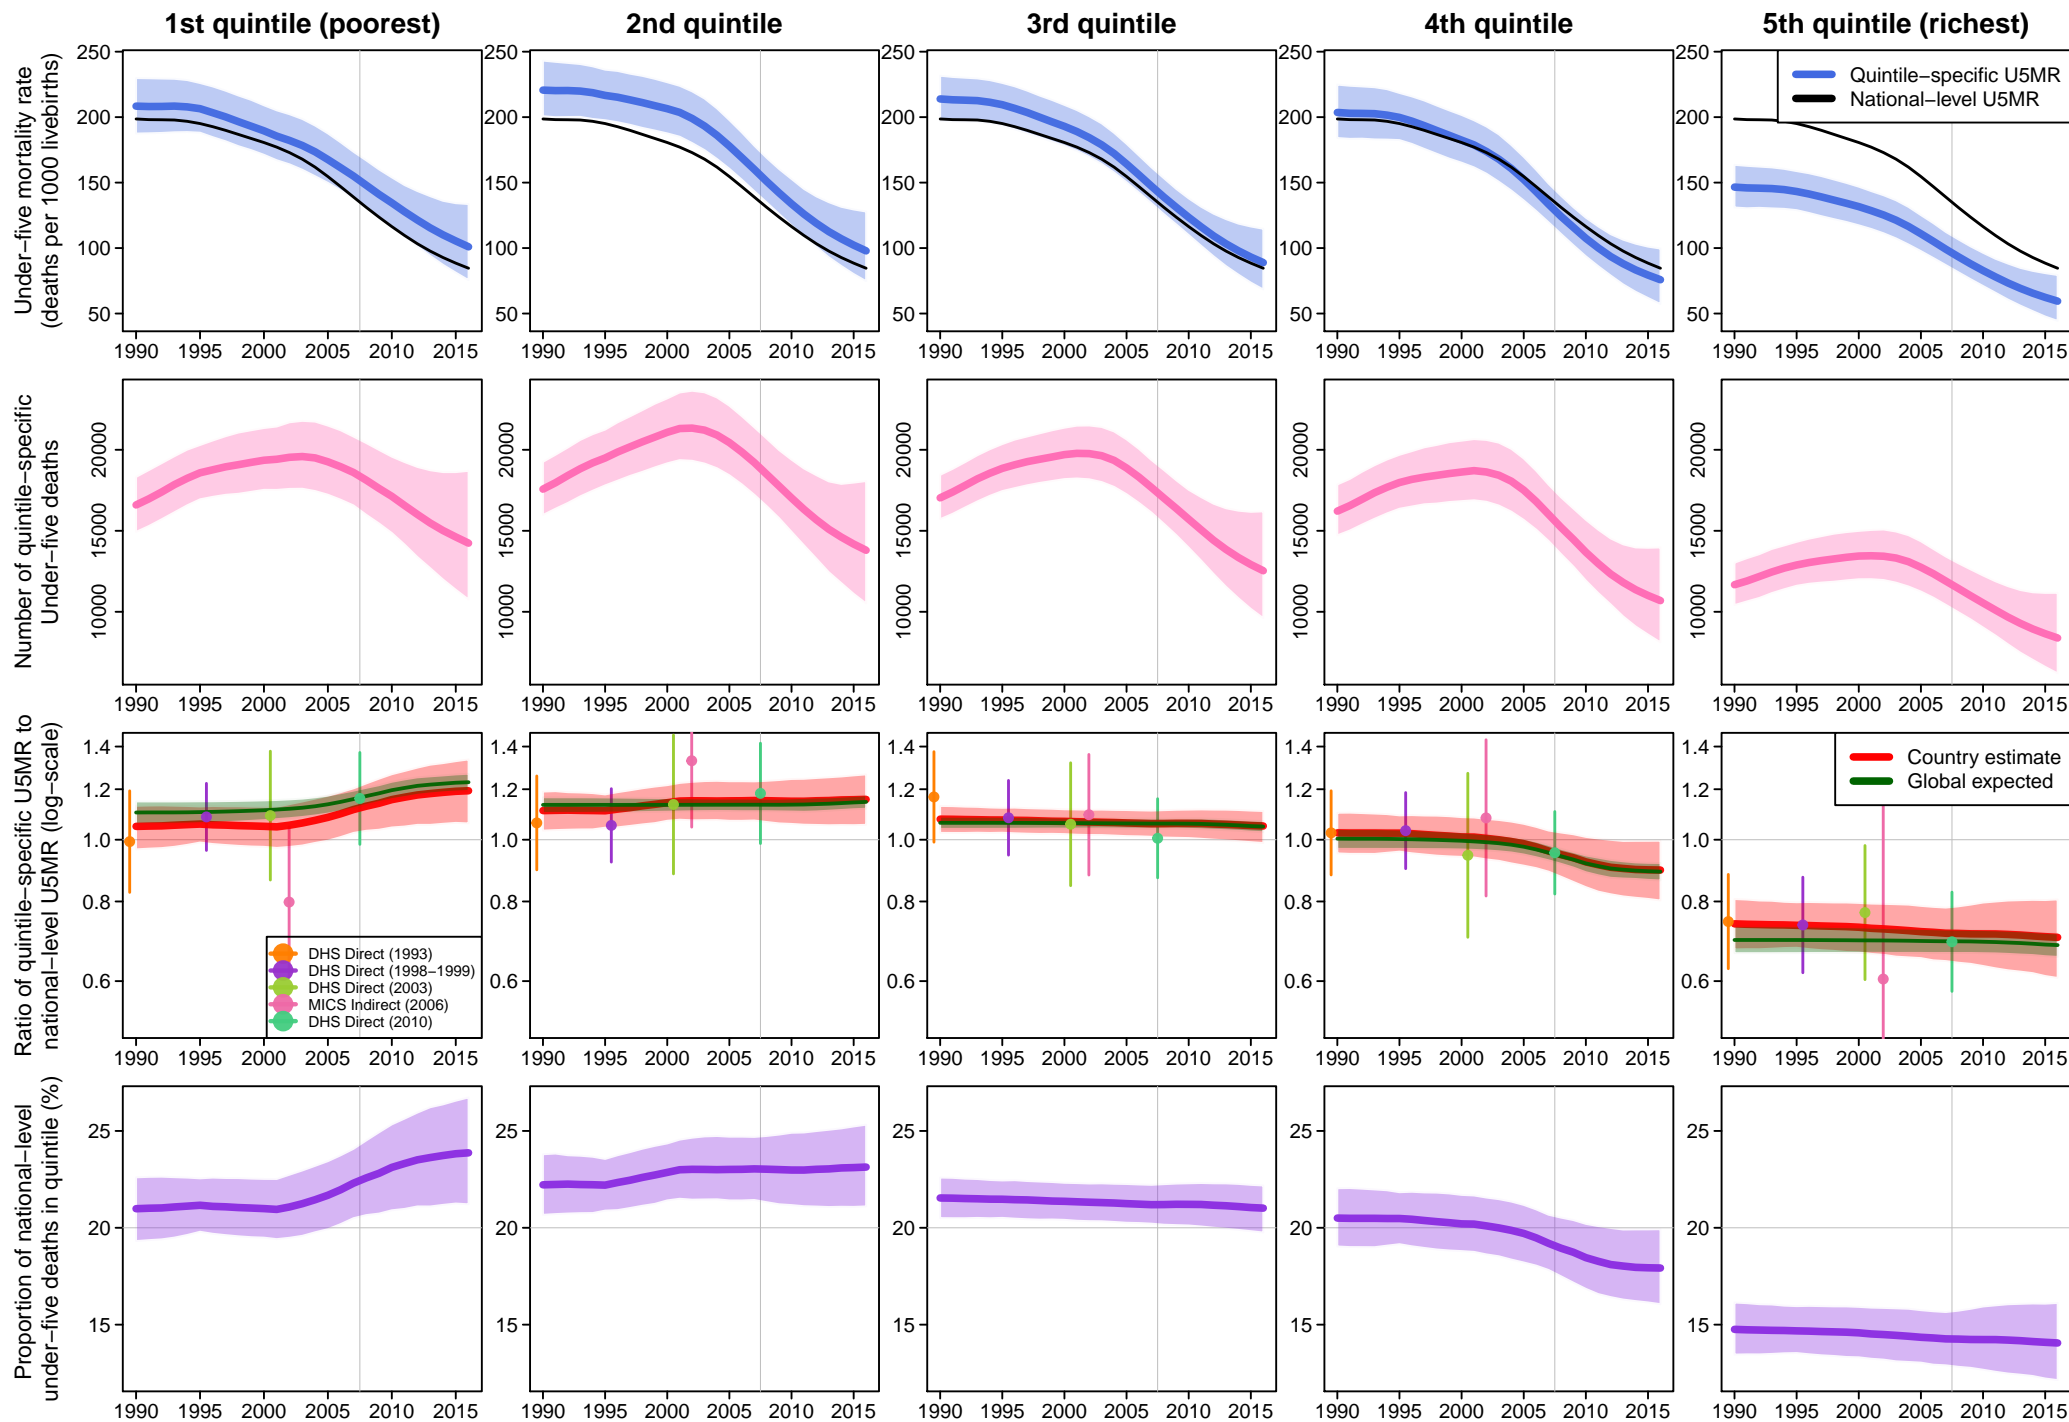

# Burundi

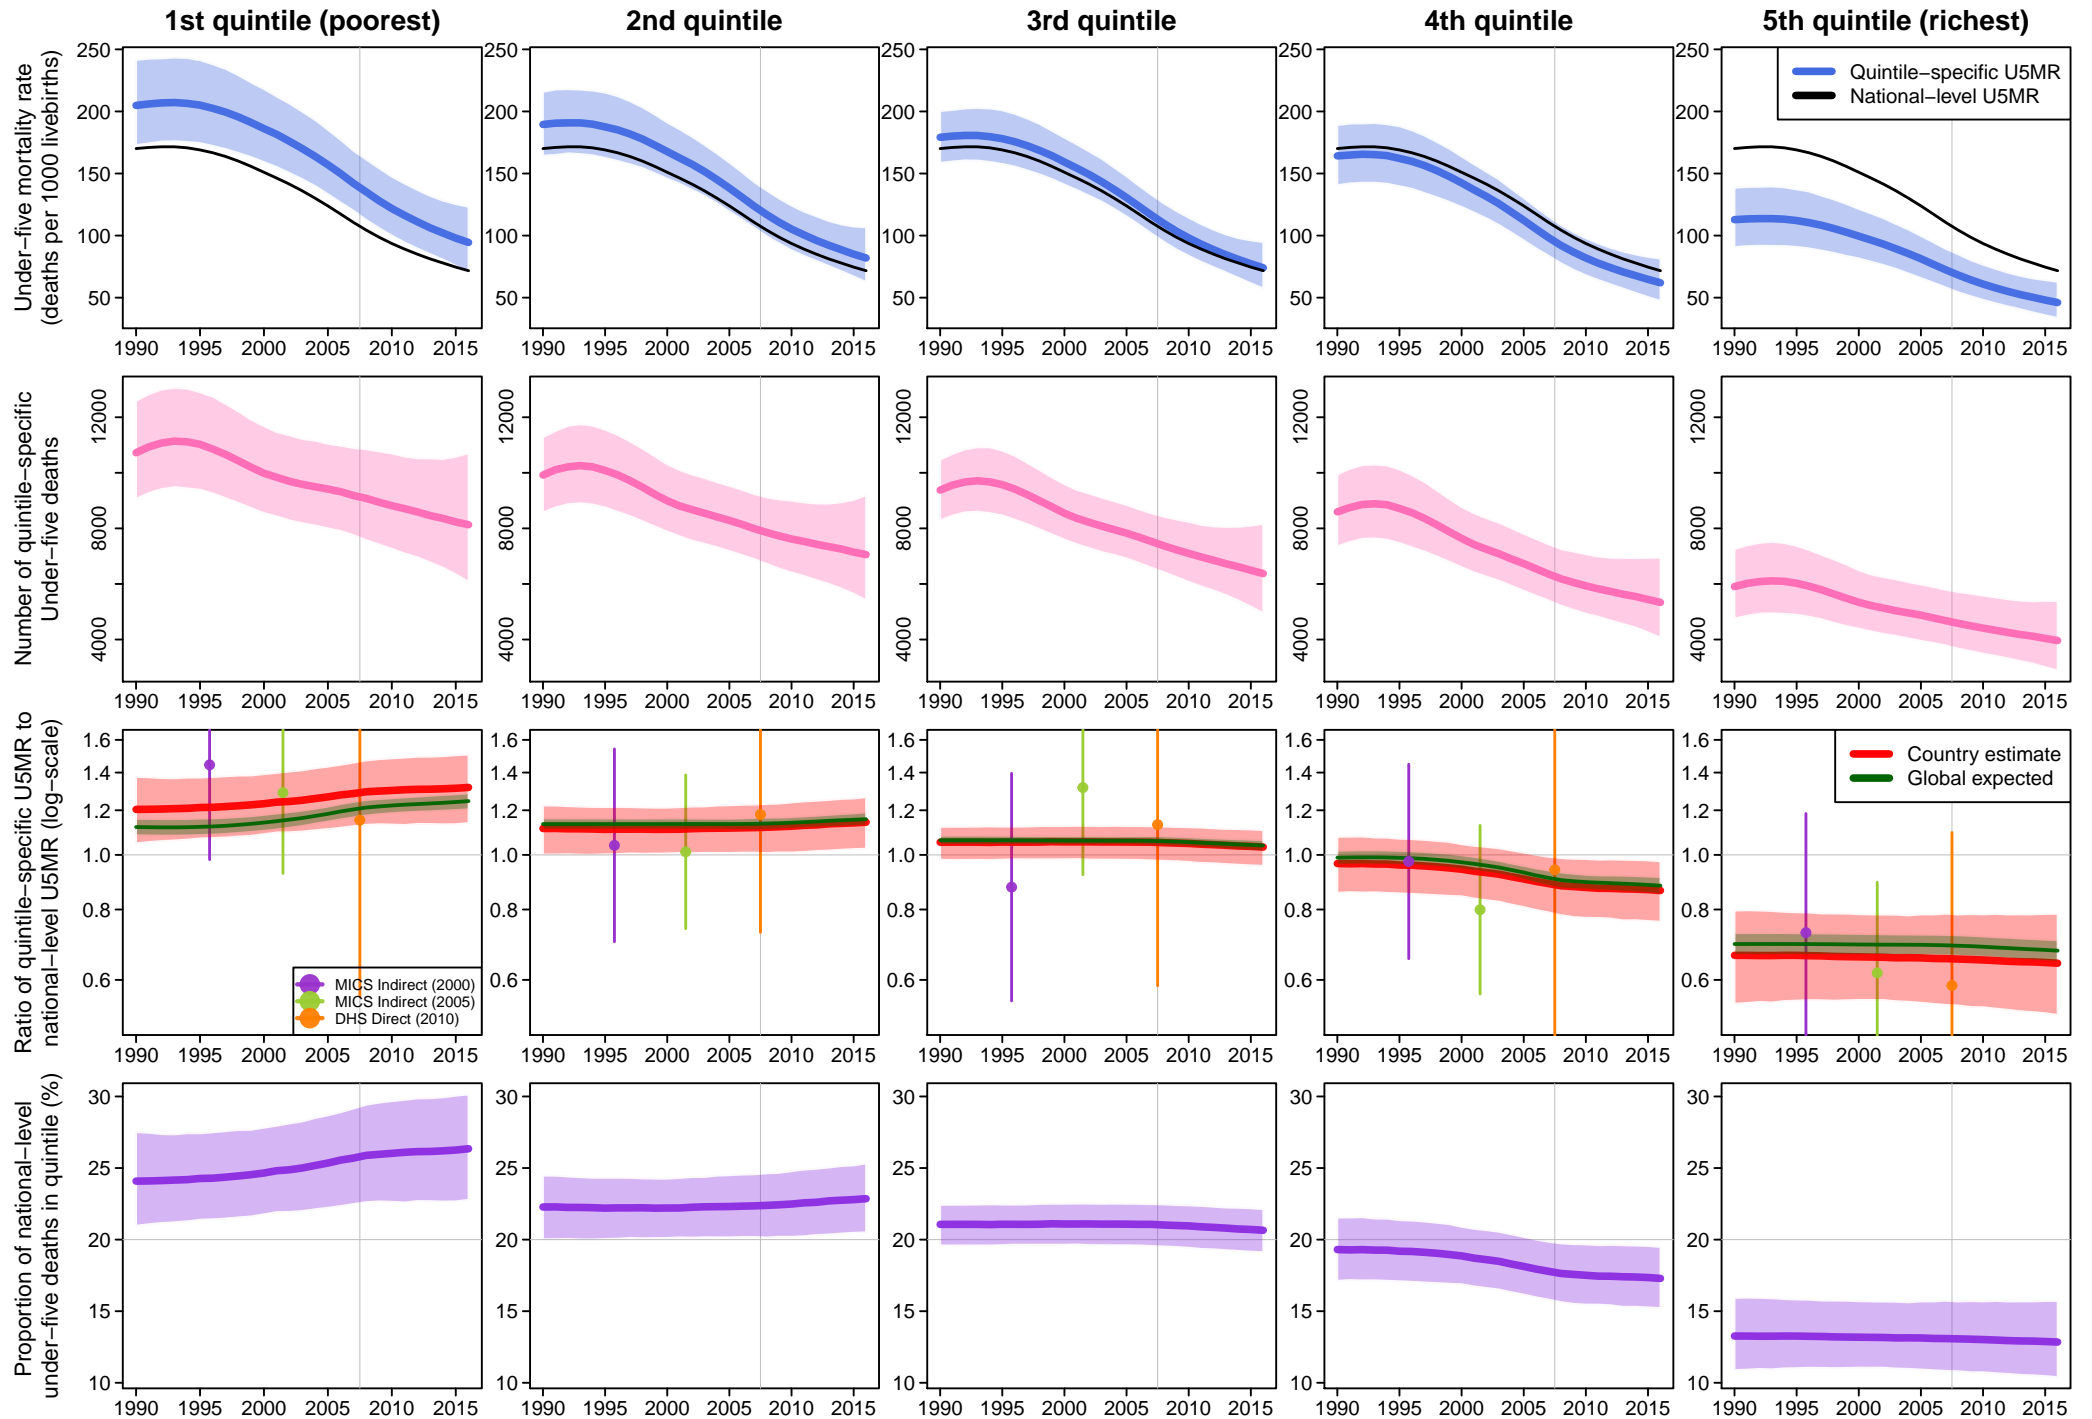

# Cambodia

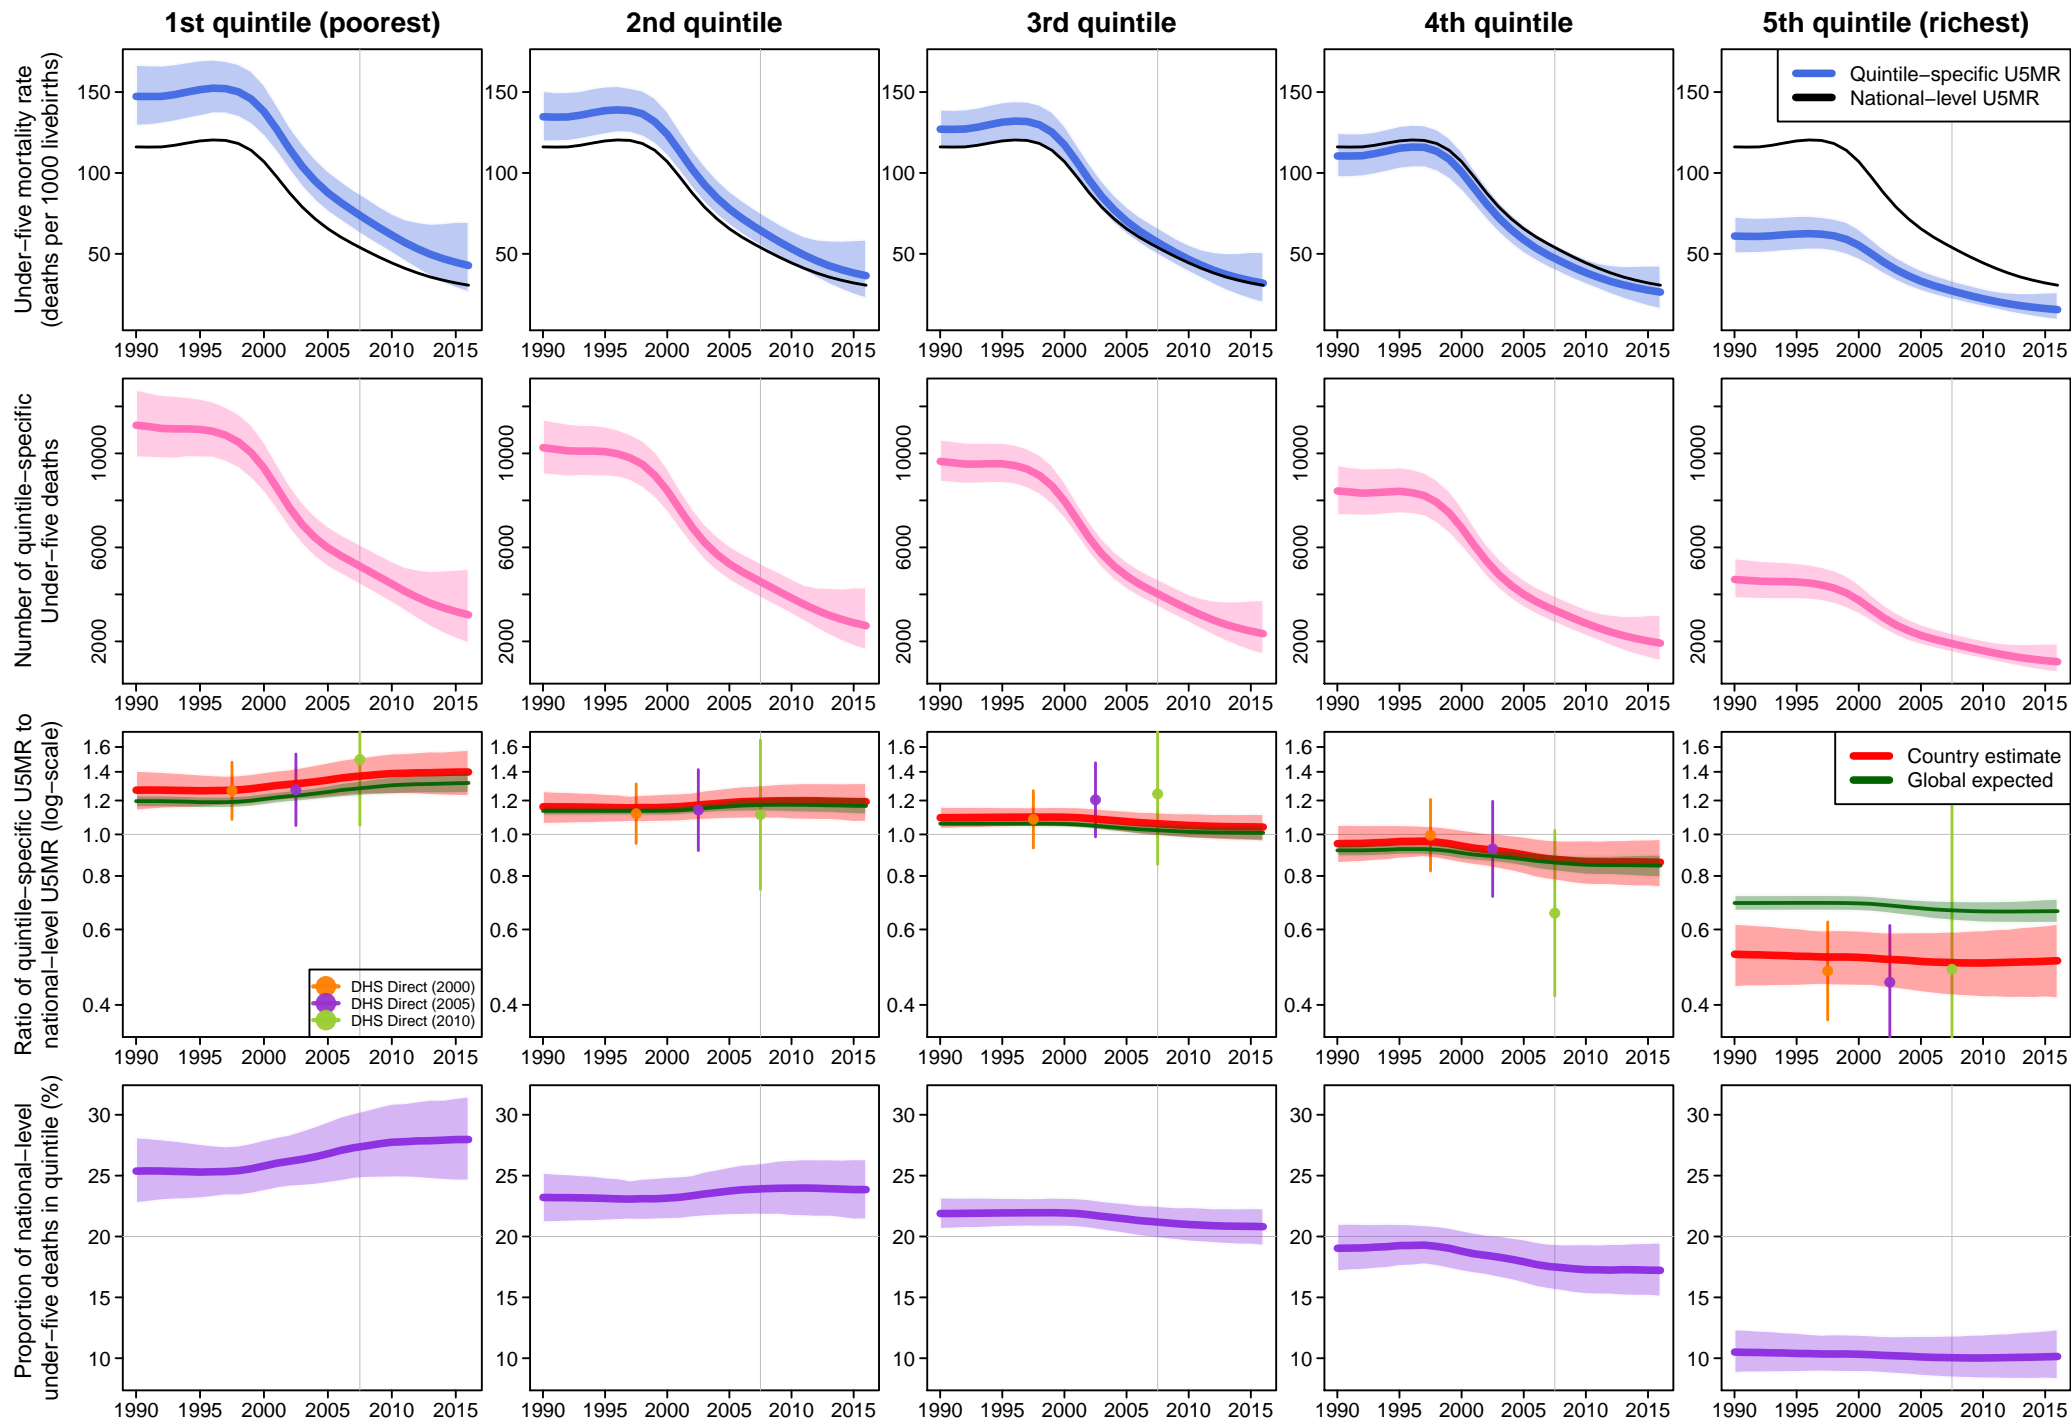

# Cameroon

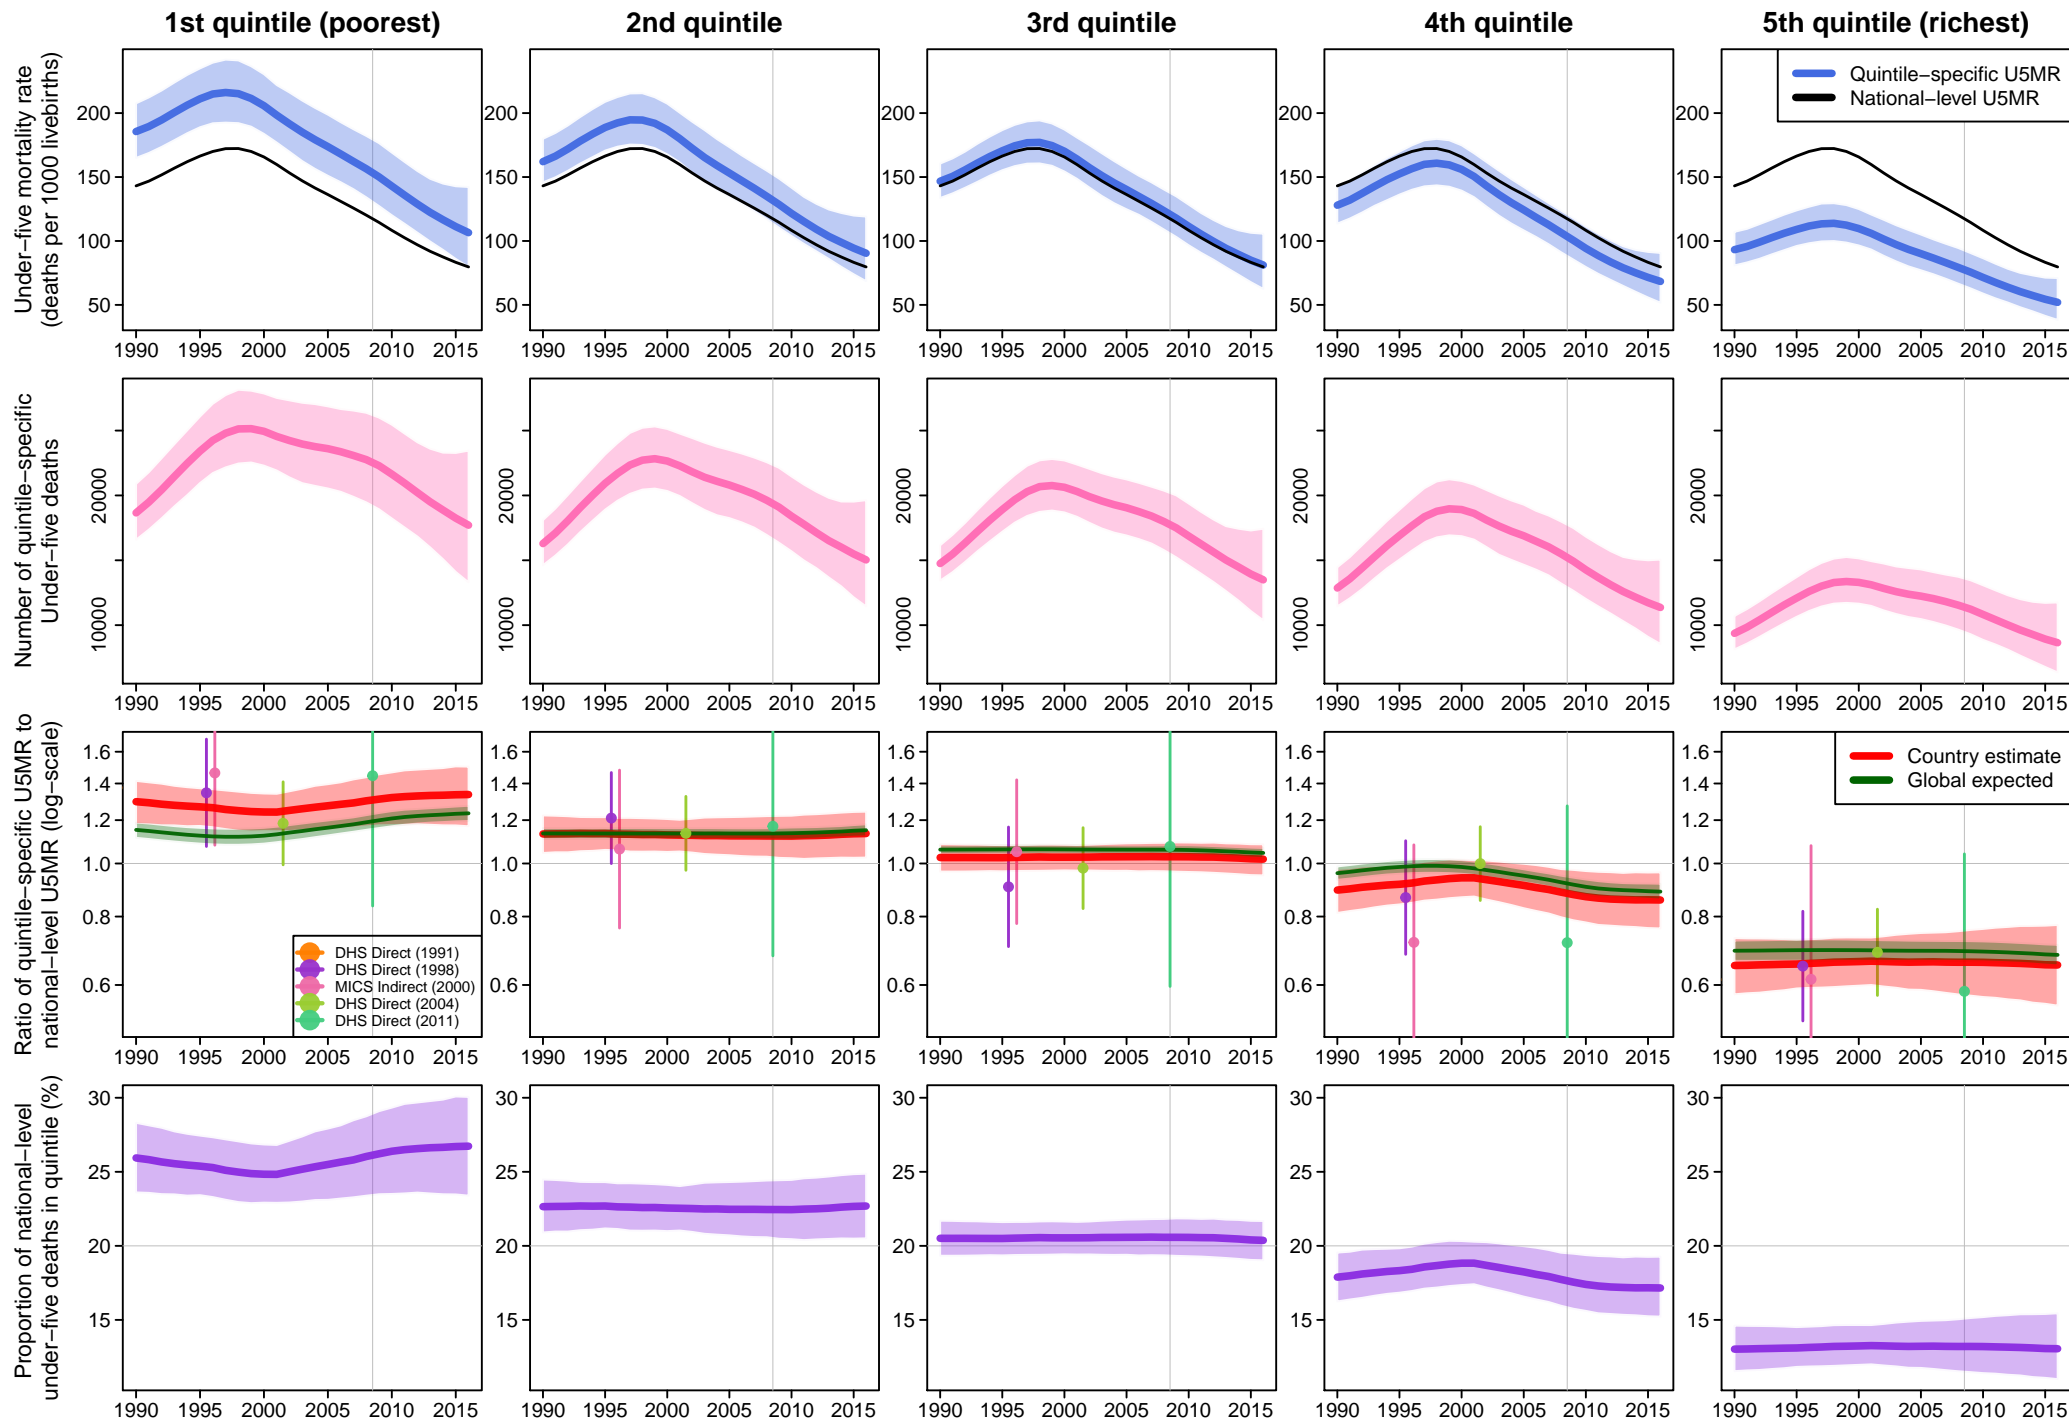

# Central African Republic

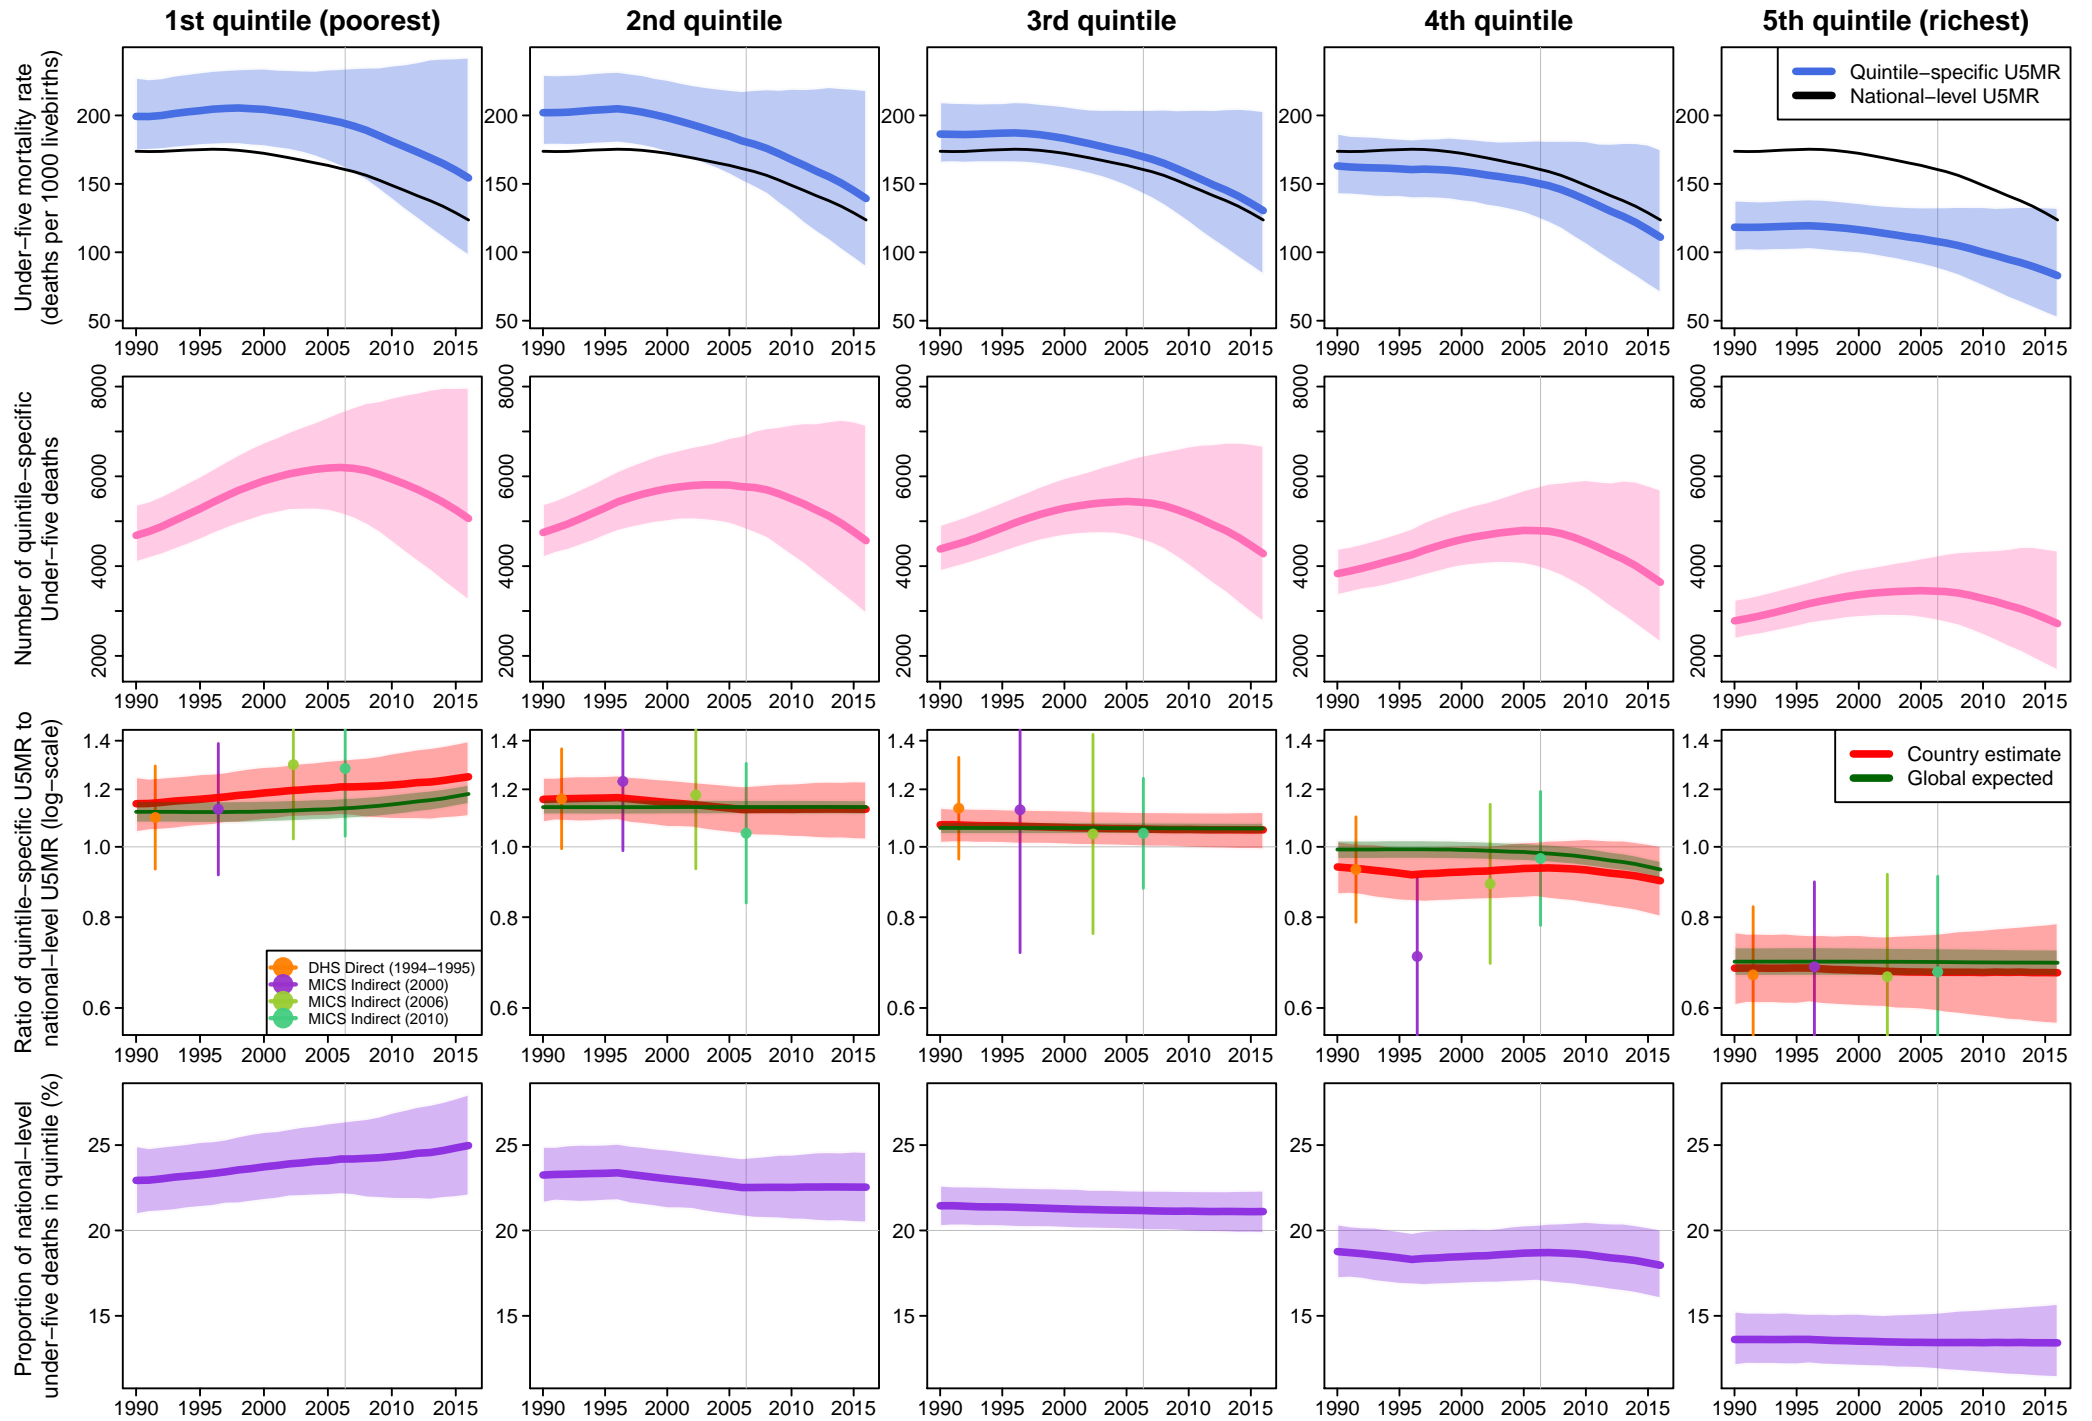

# Chad

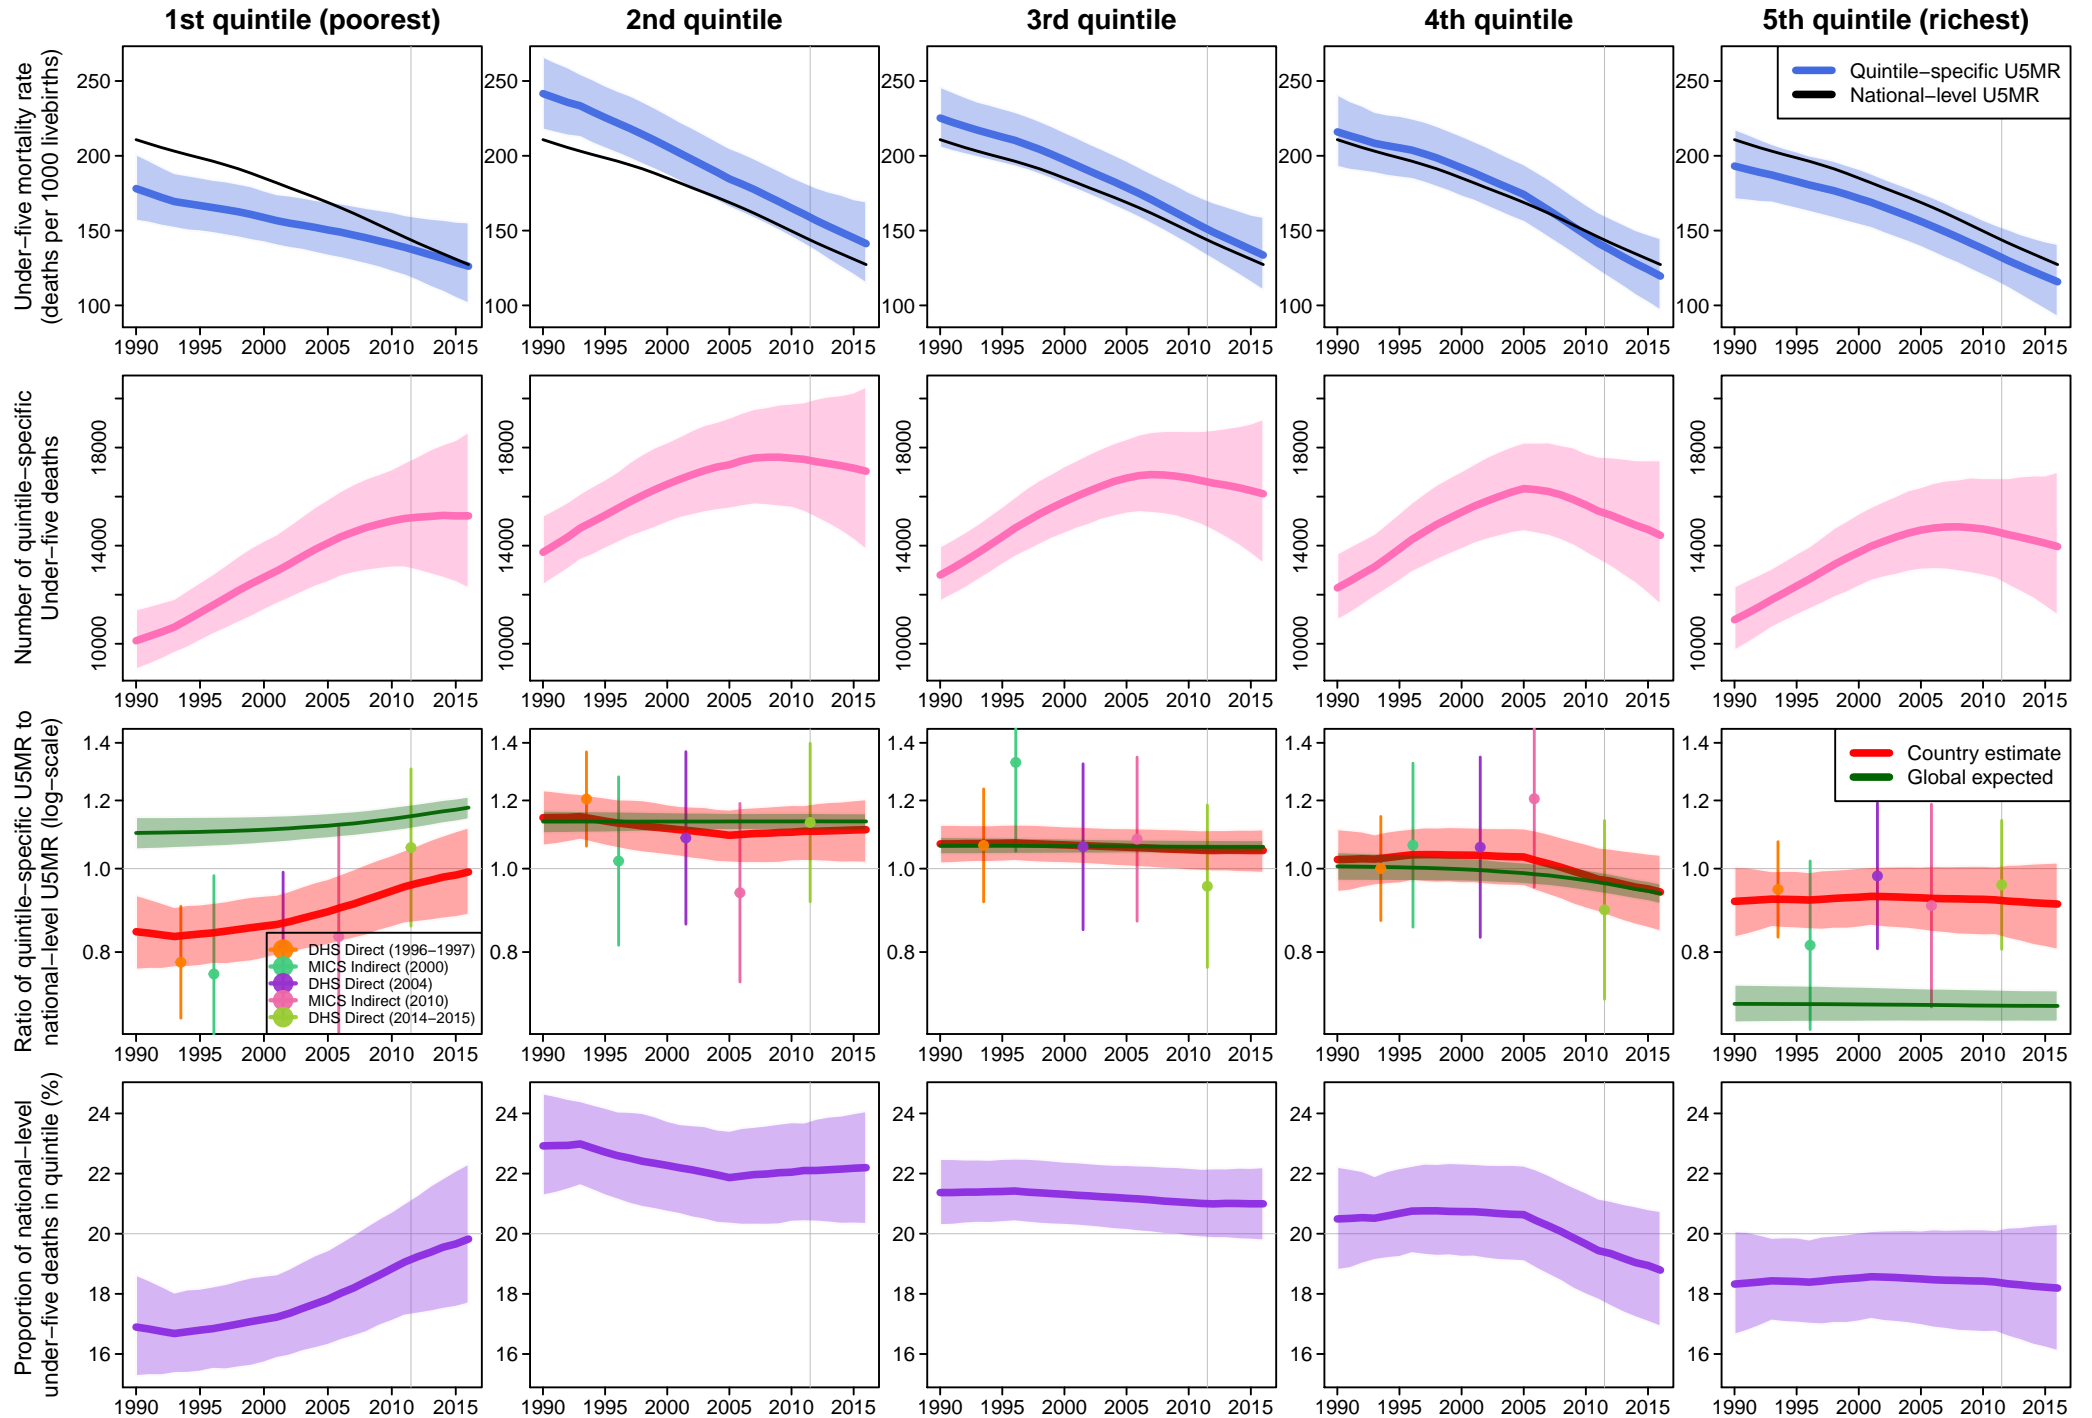



# Colombia

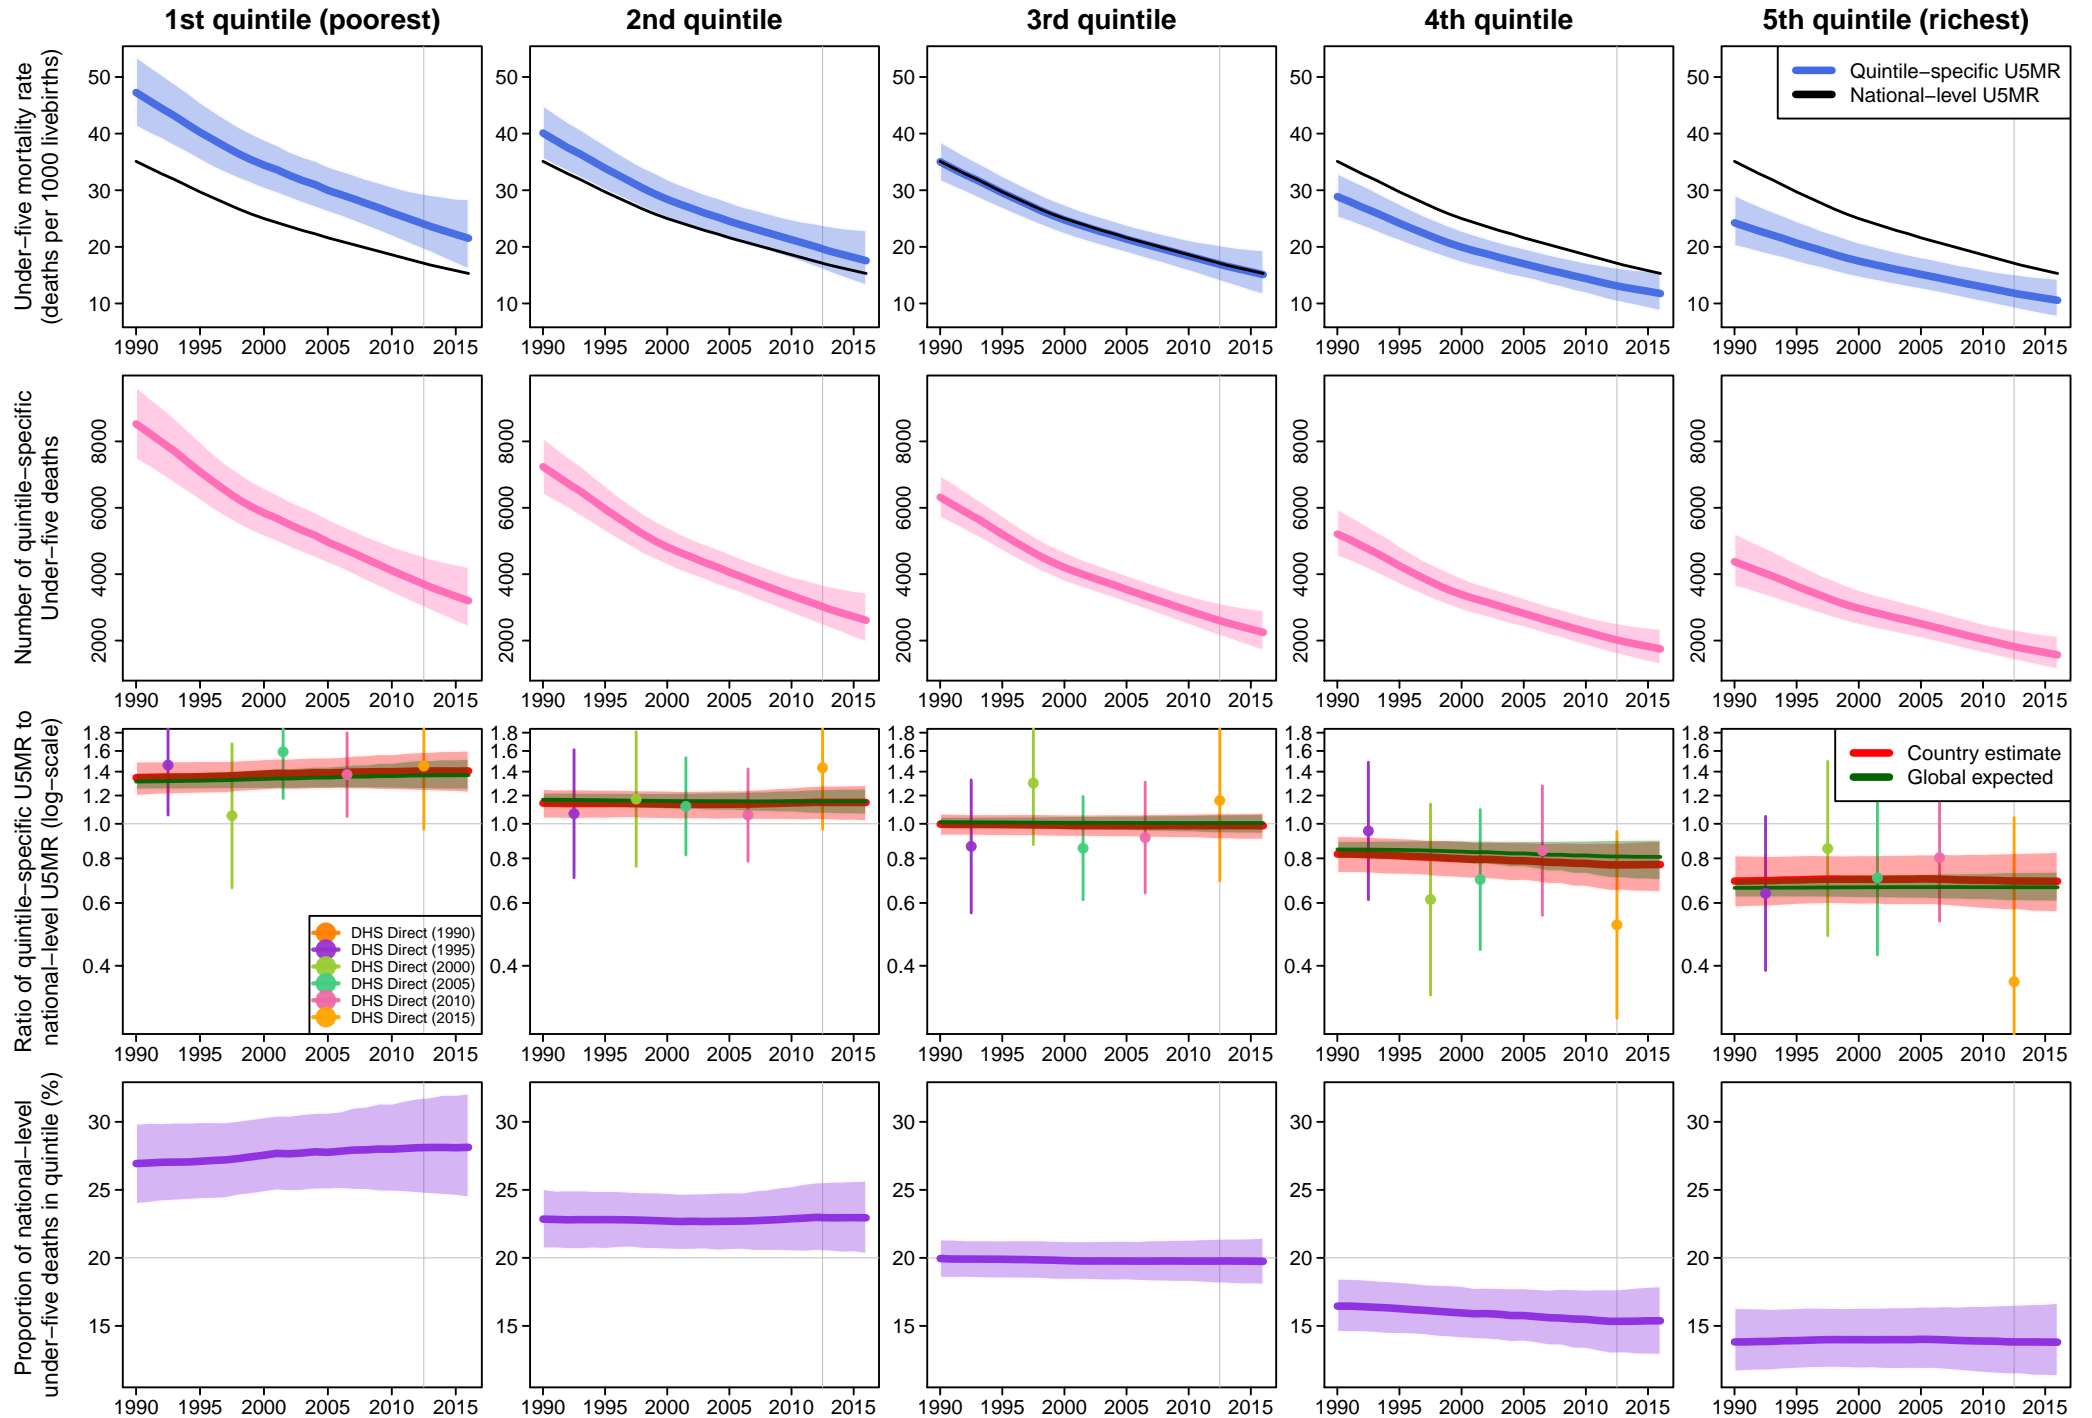

# Comoros

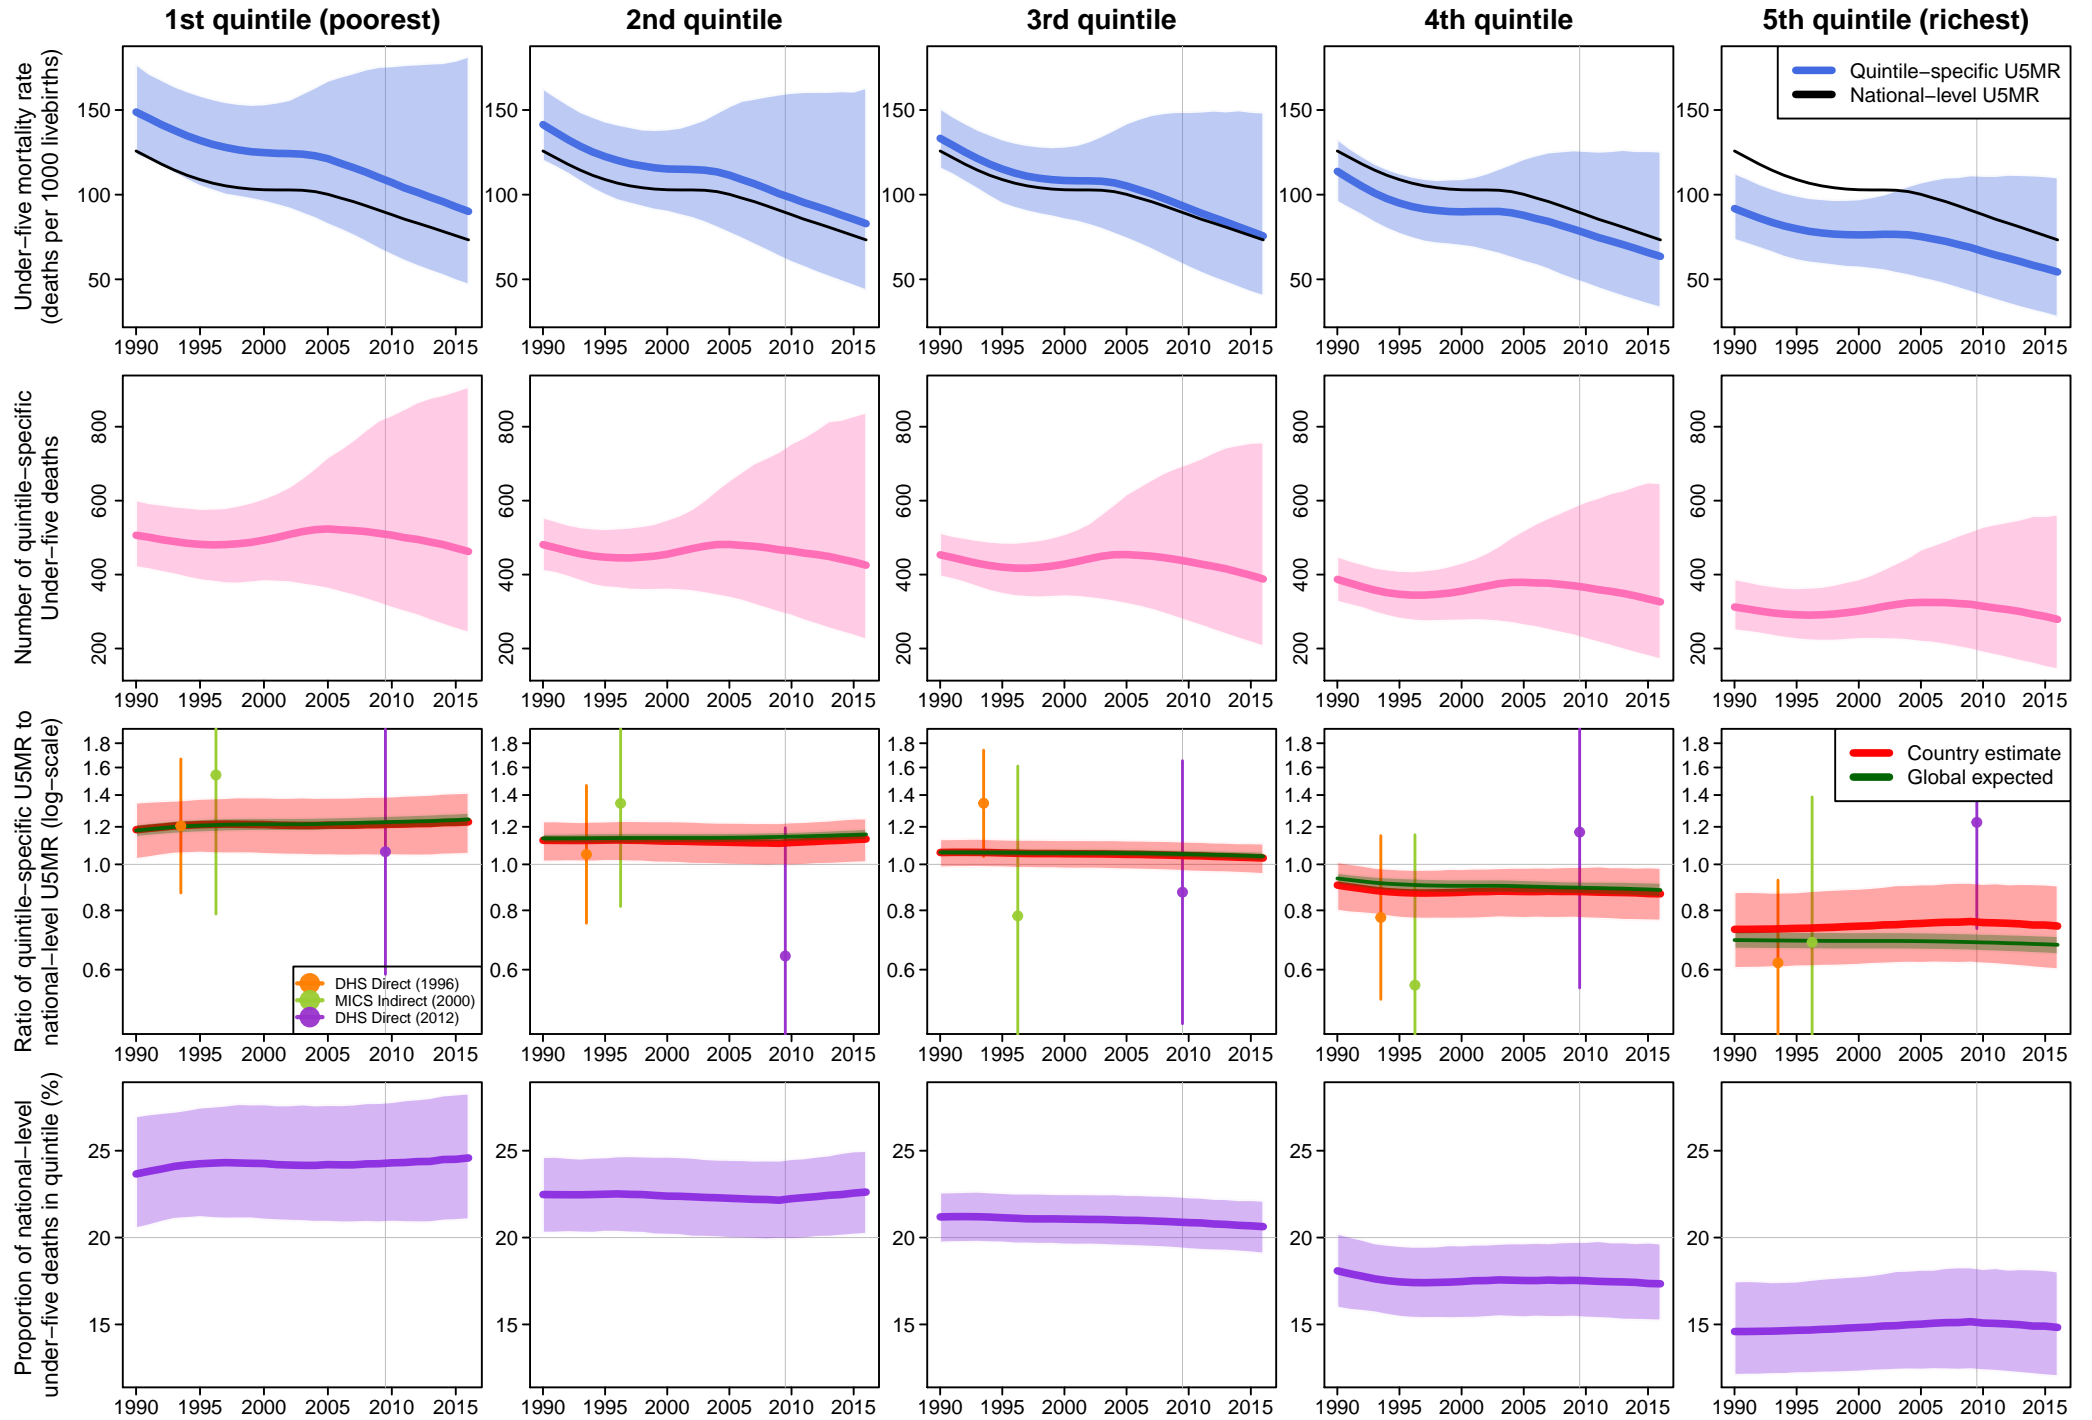

# Congo

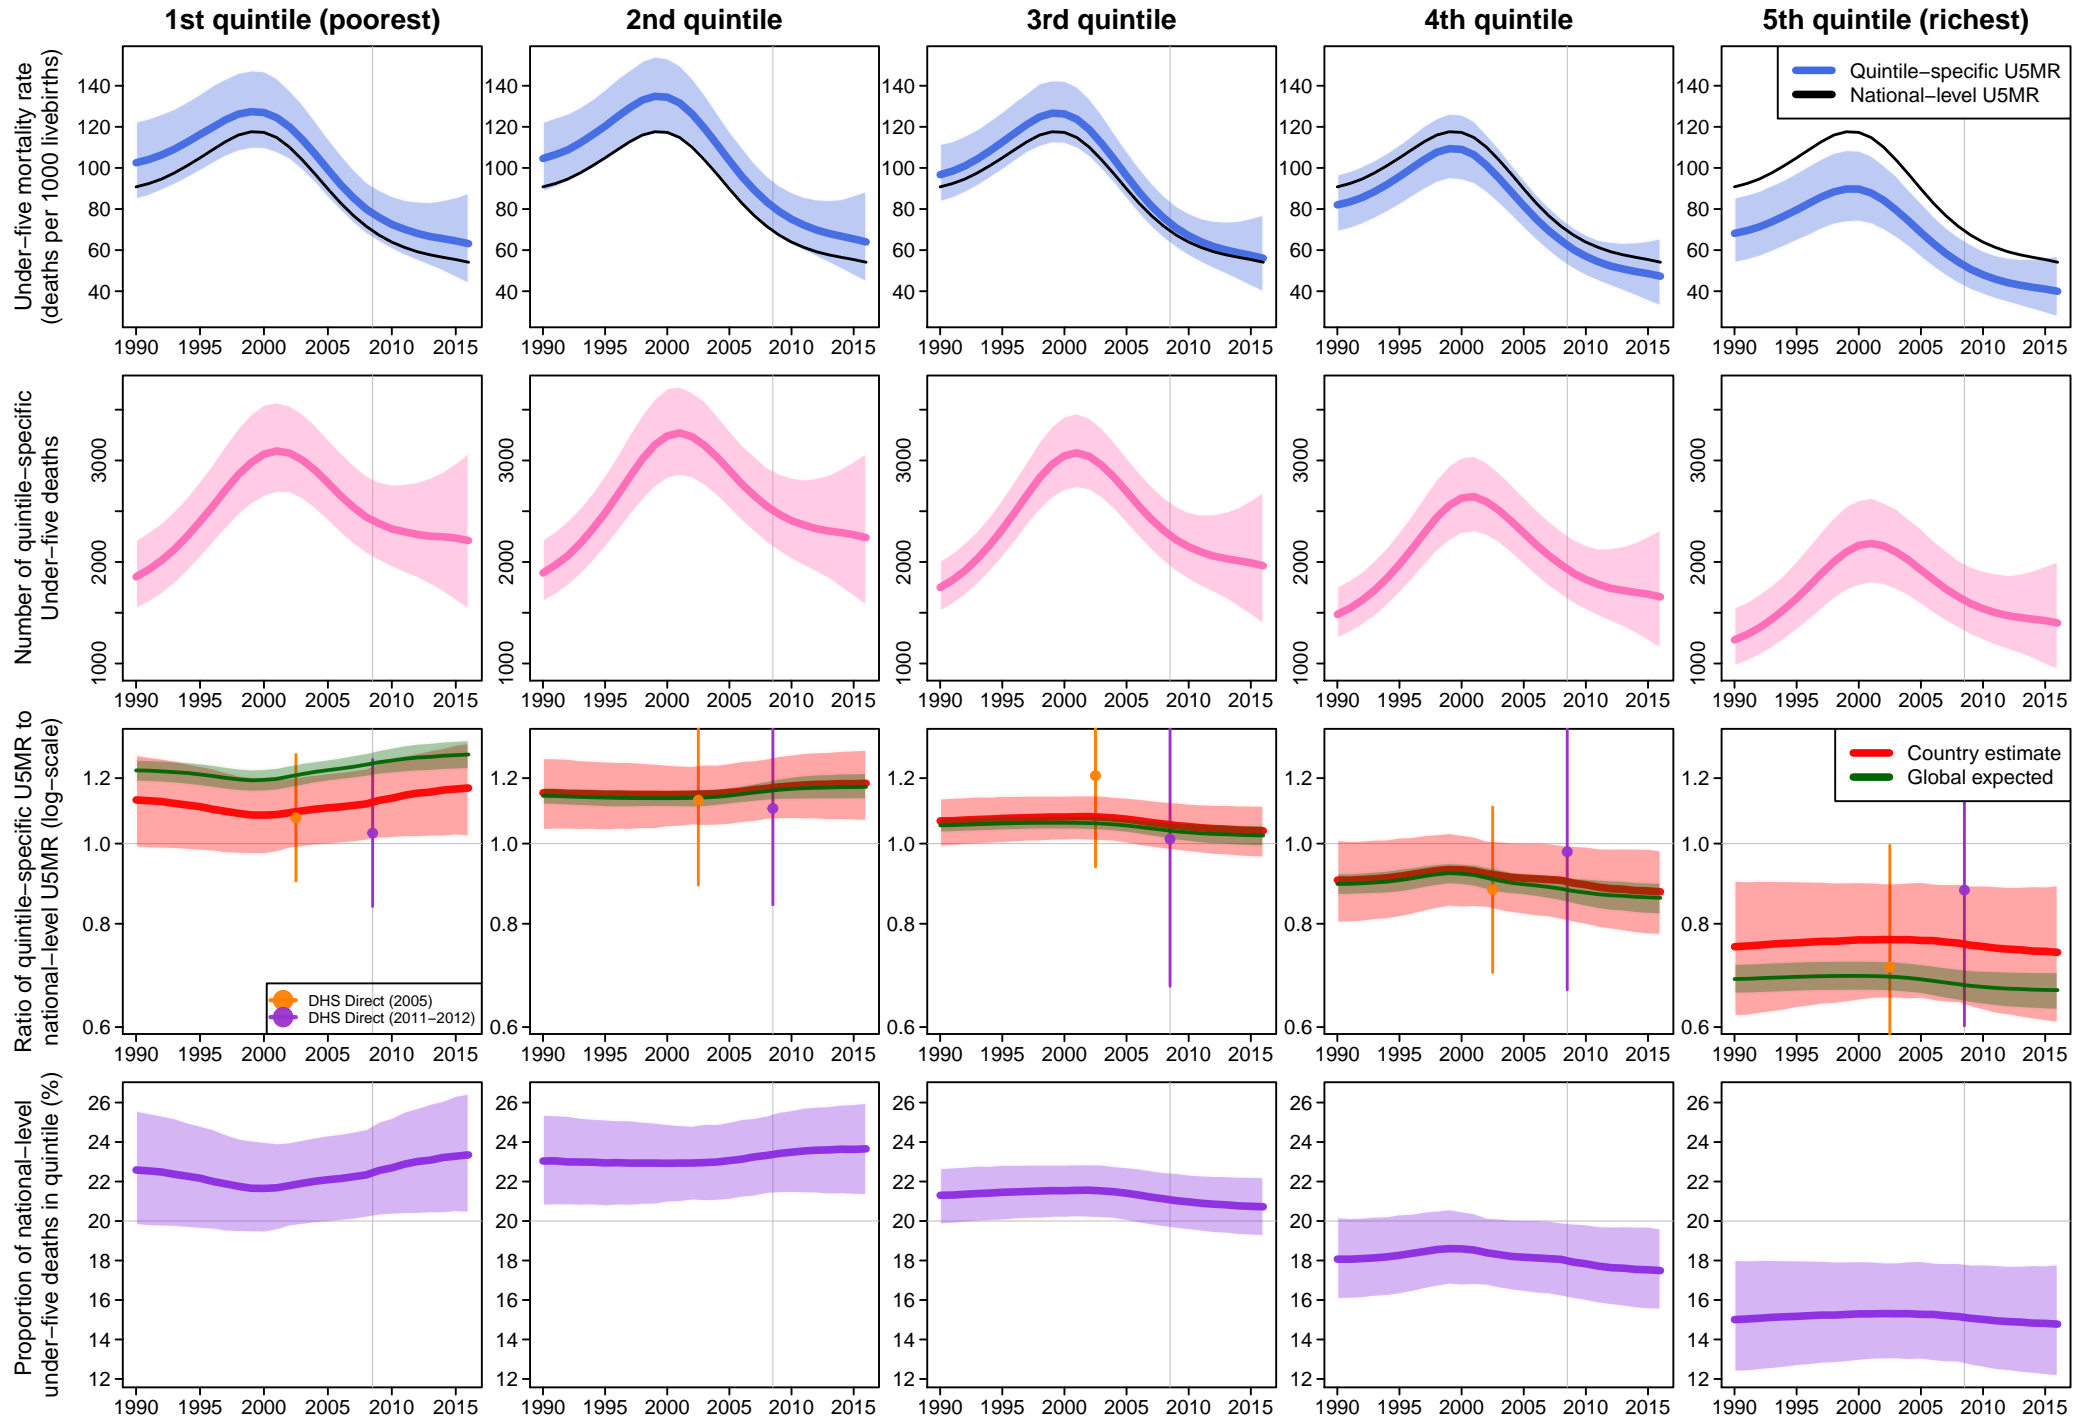

# Cote d'Ivoire

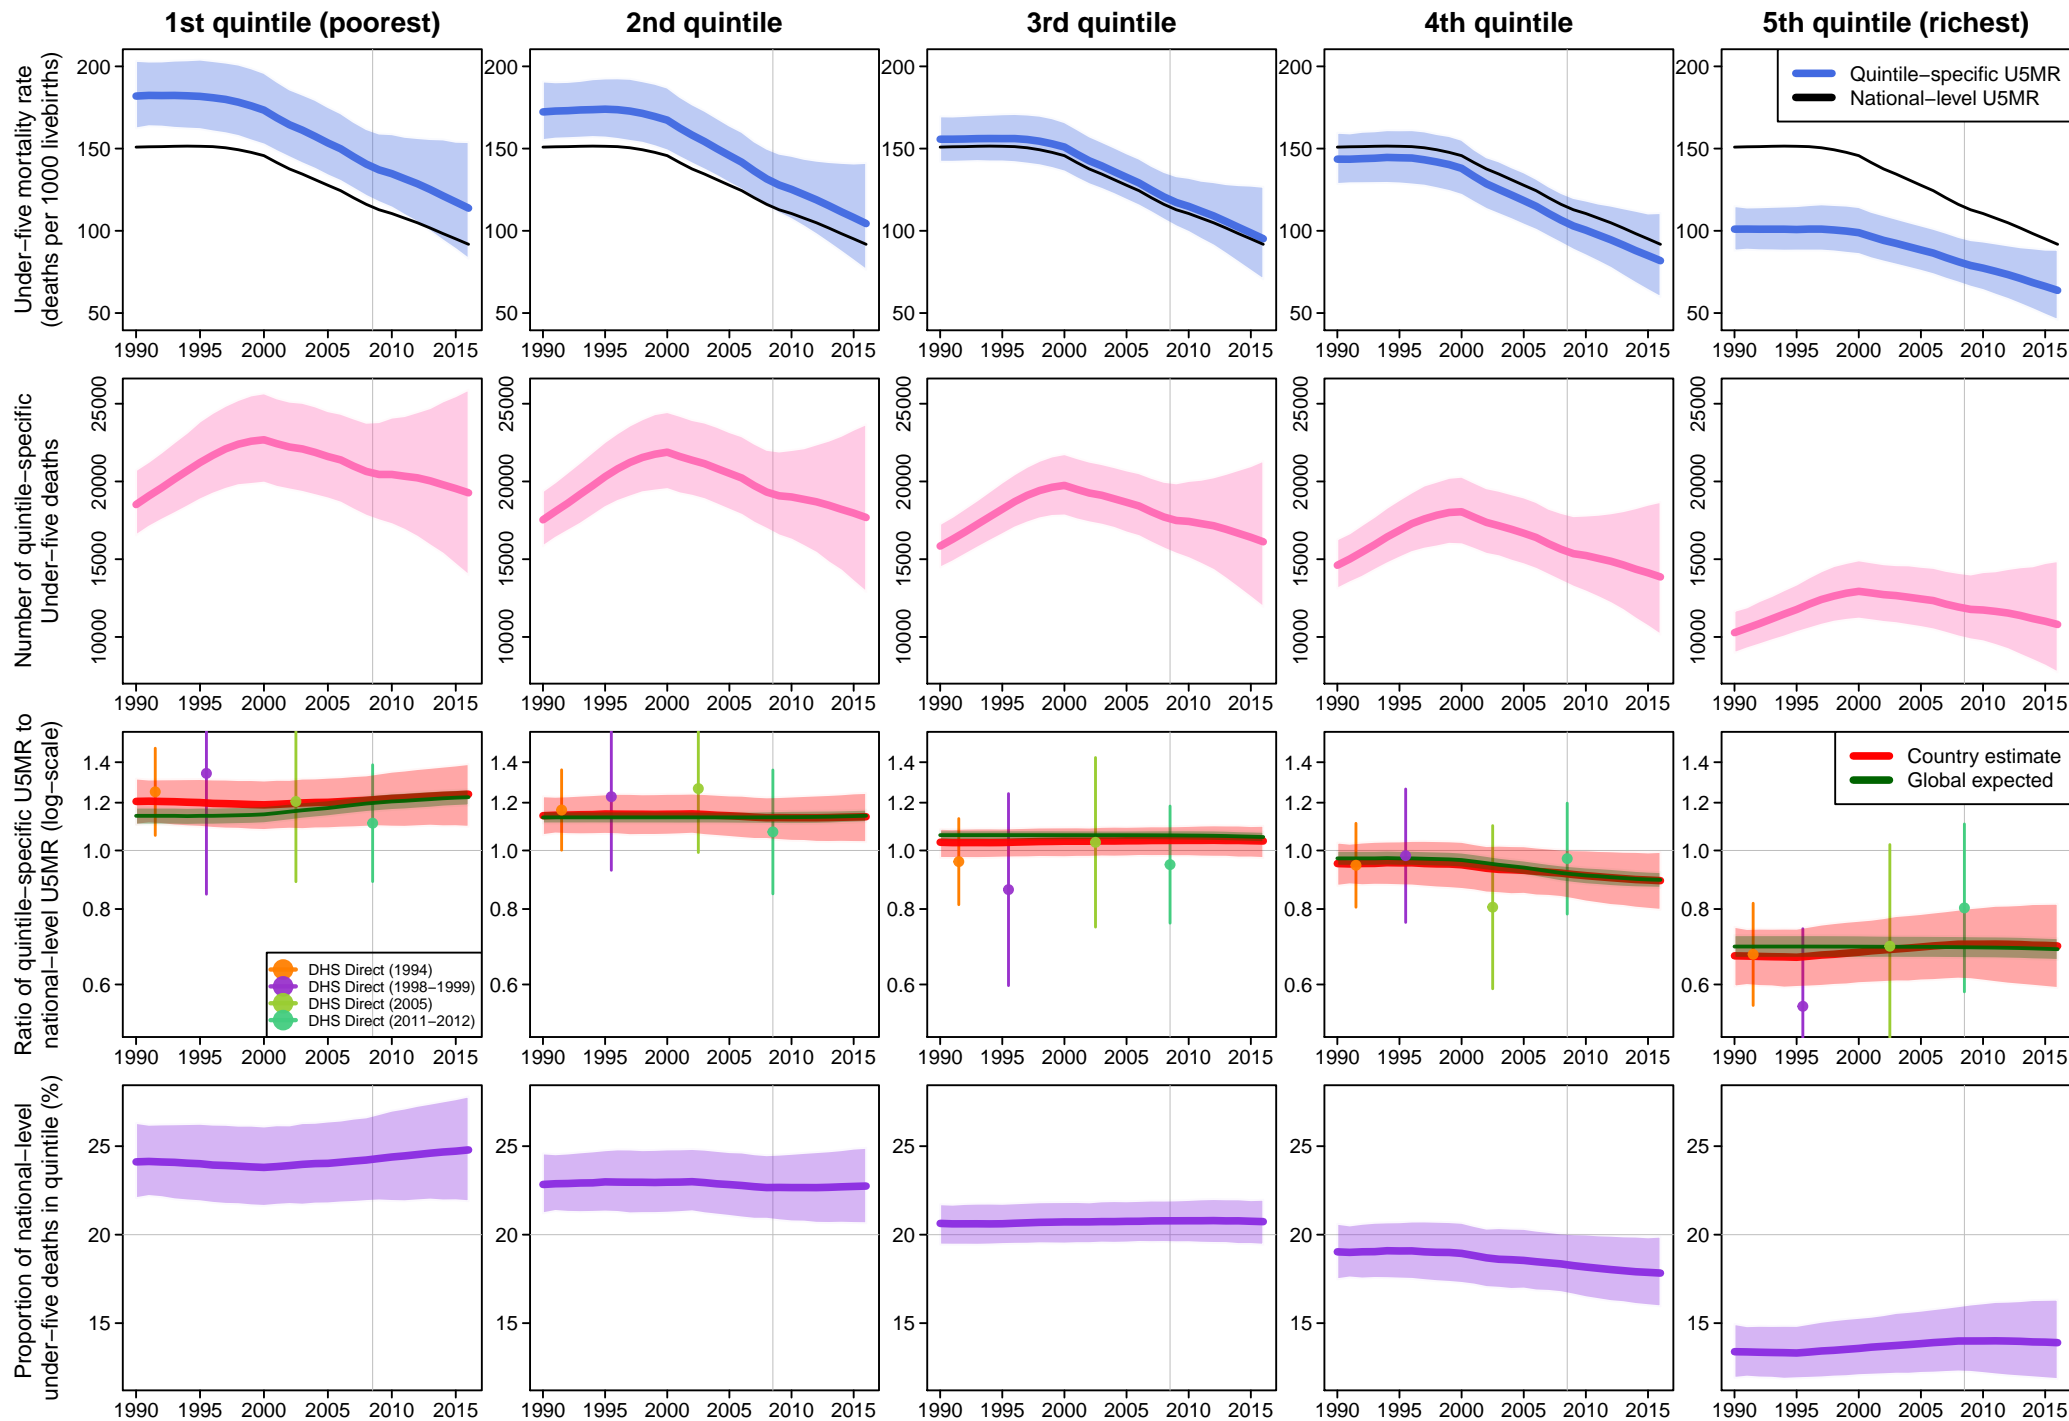

# Democratic Republic of the Congo

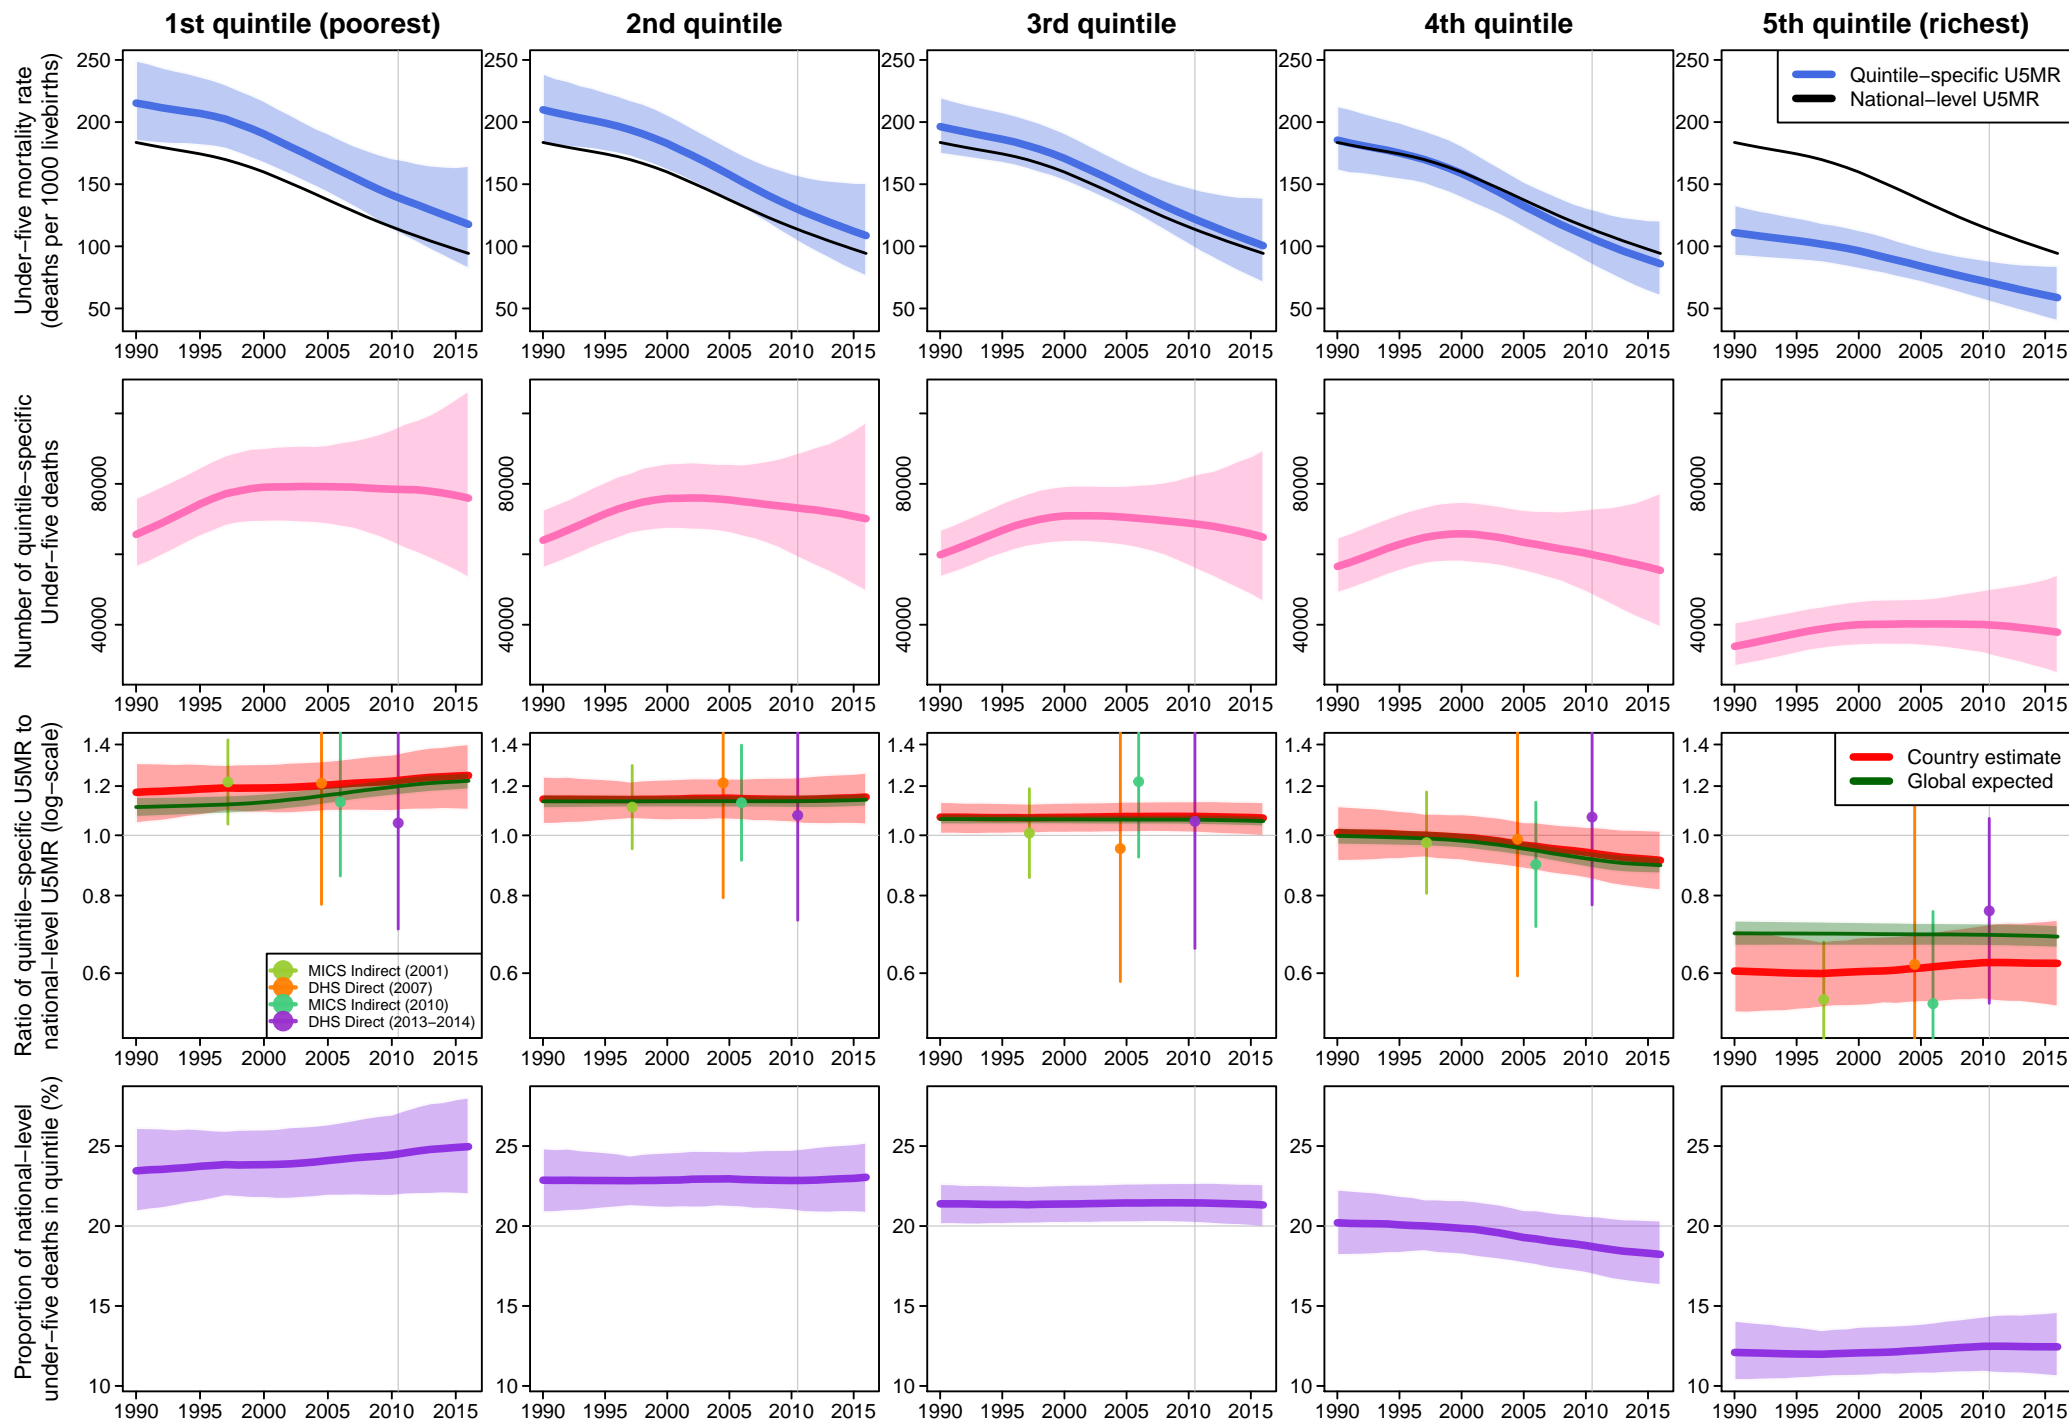

# Dominican Republic

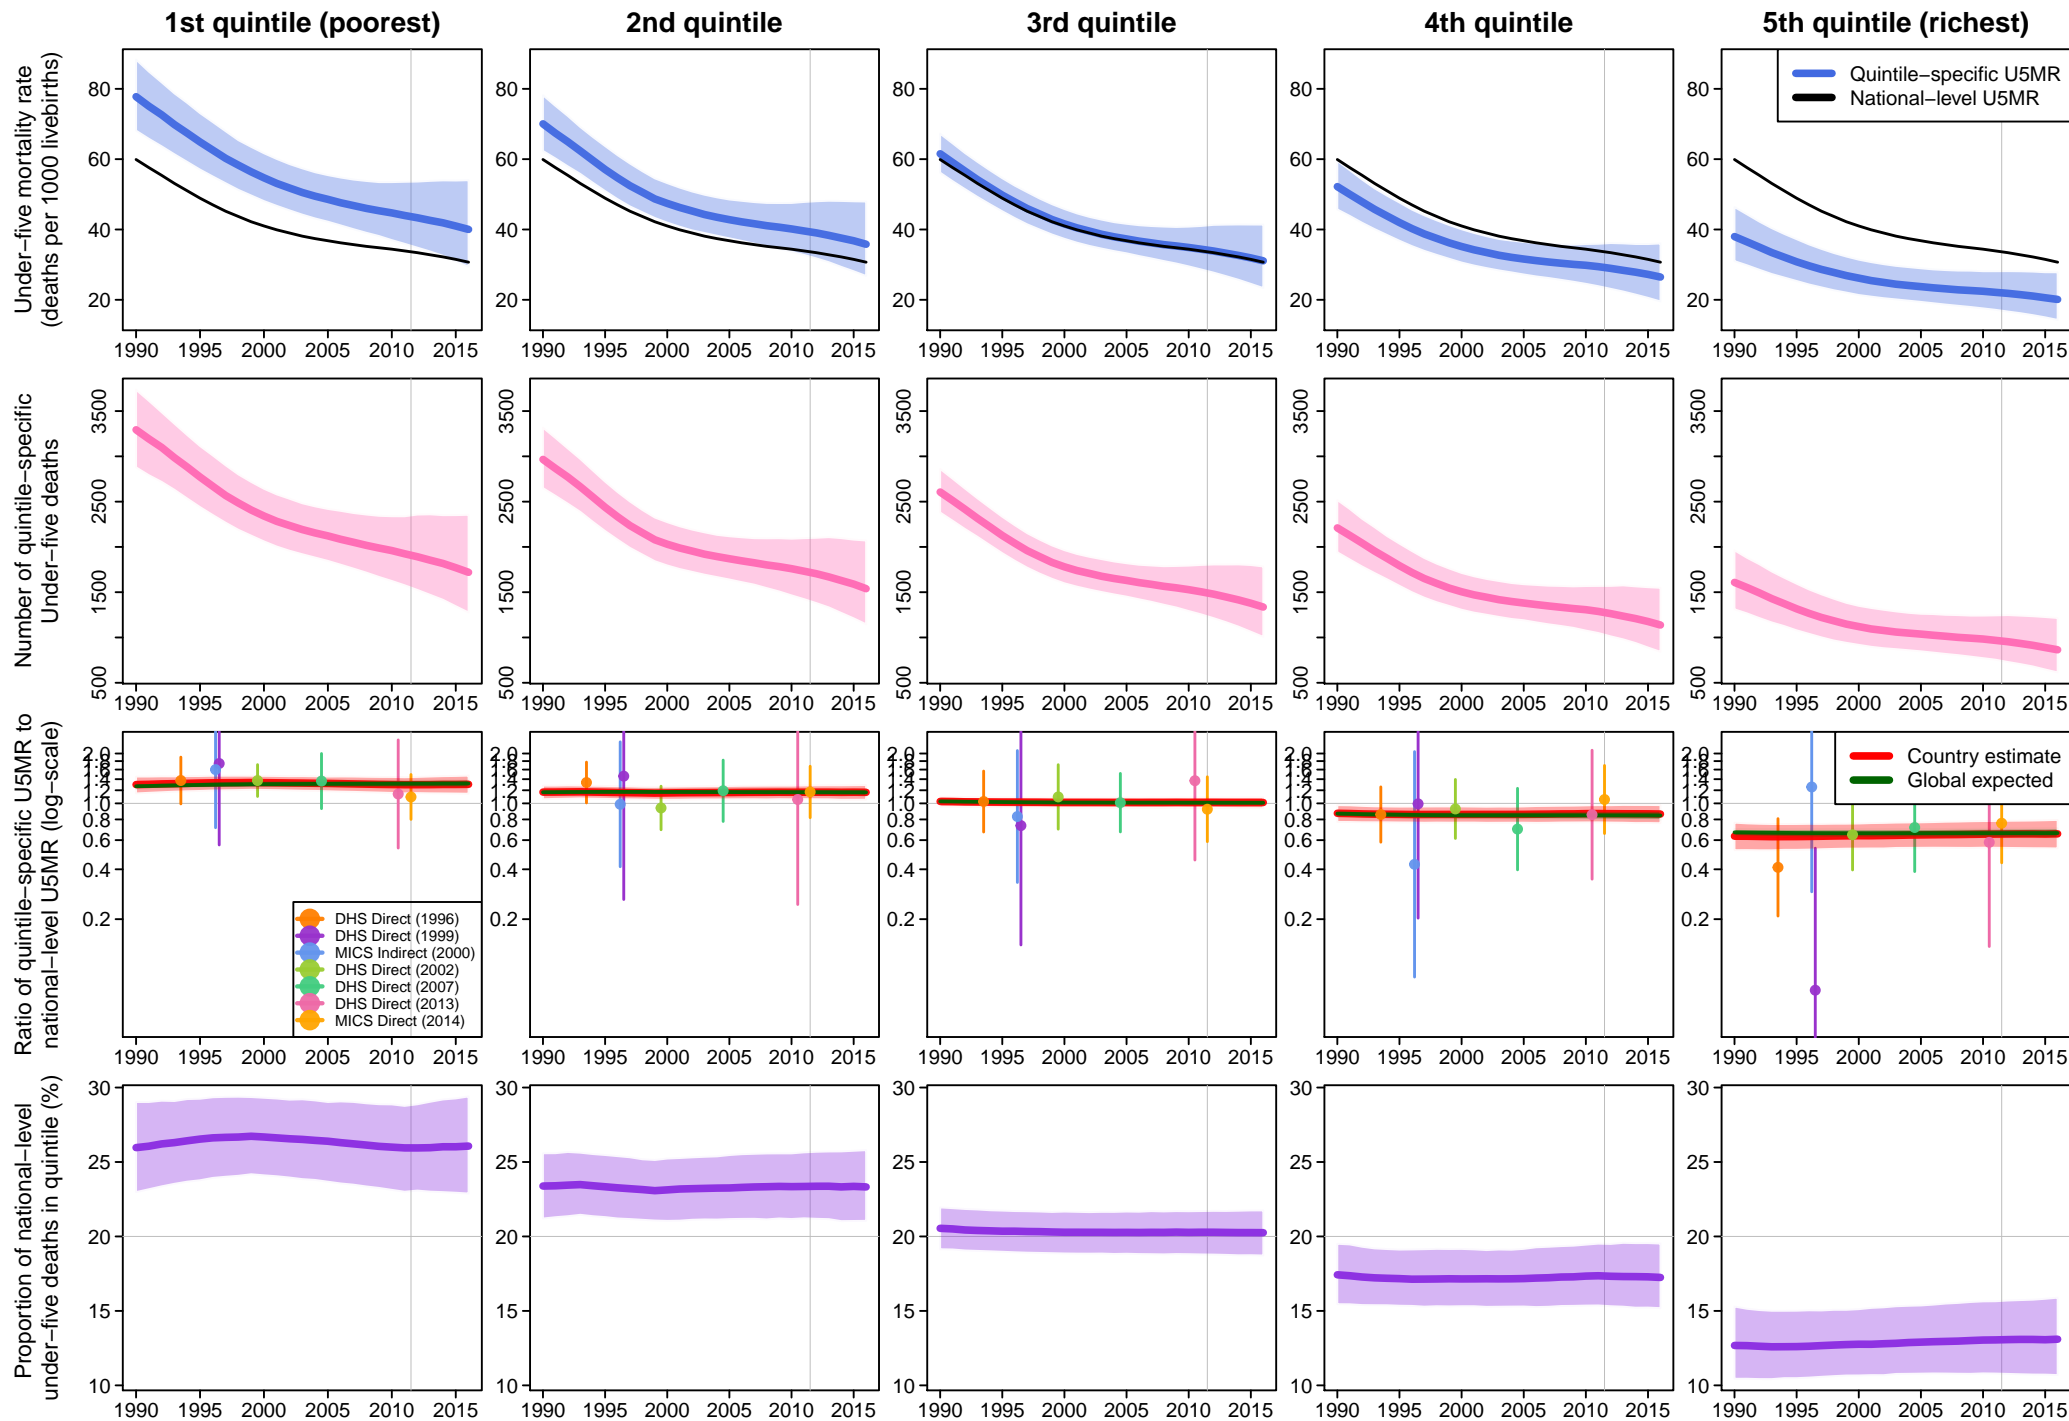

# Egypt

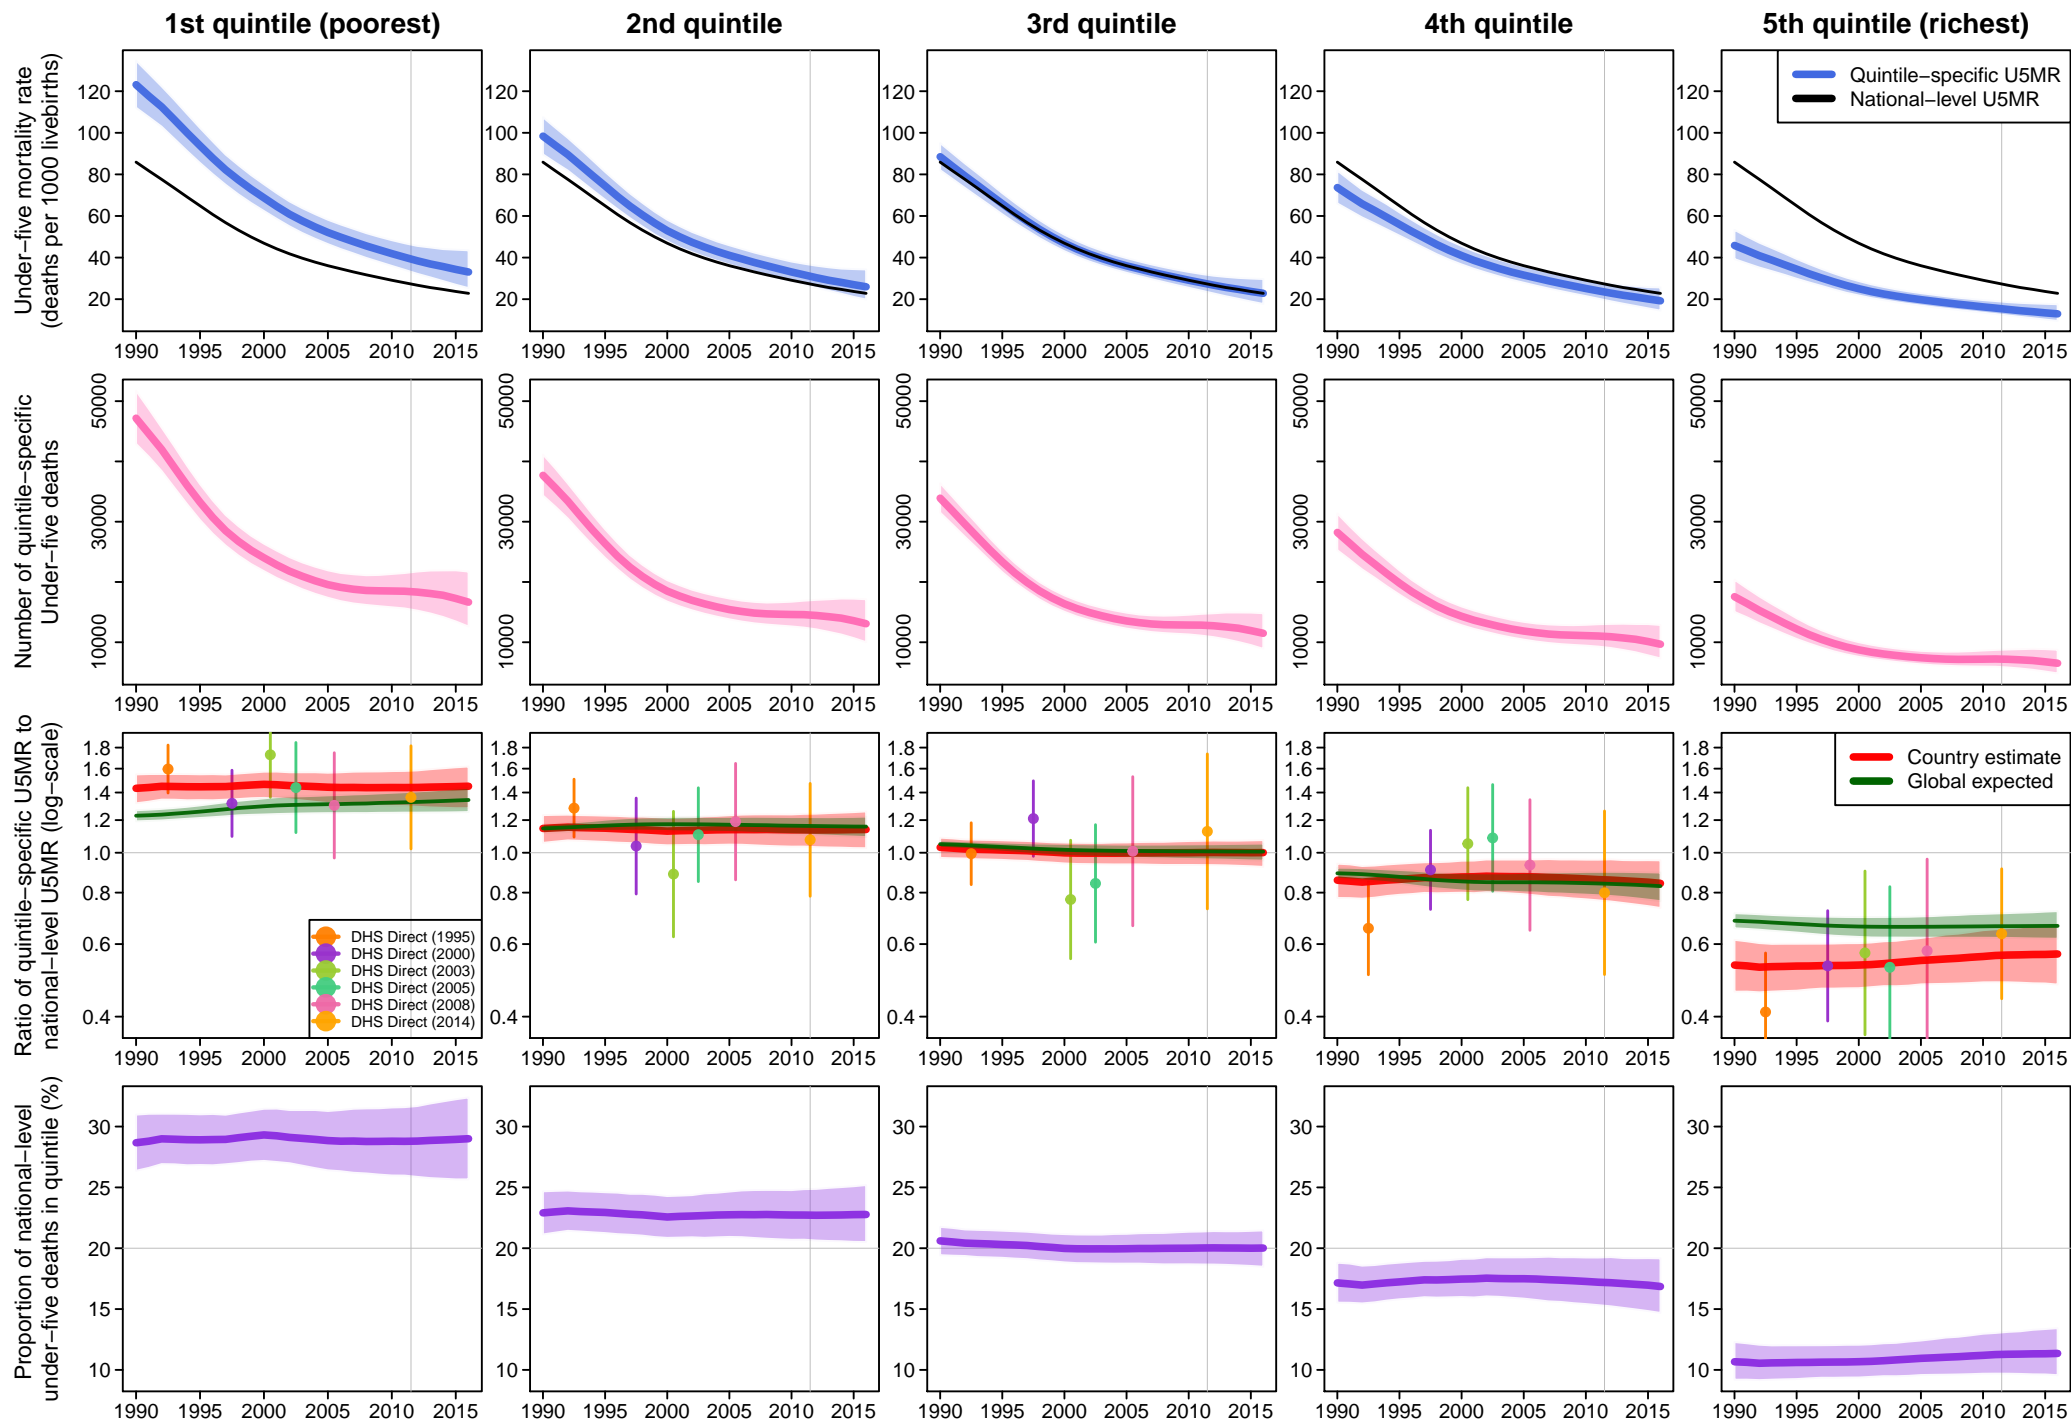

# El Salvador

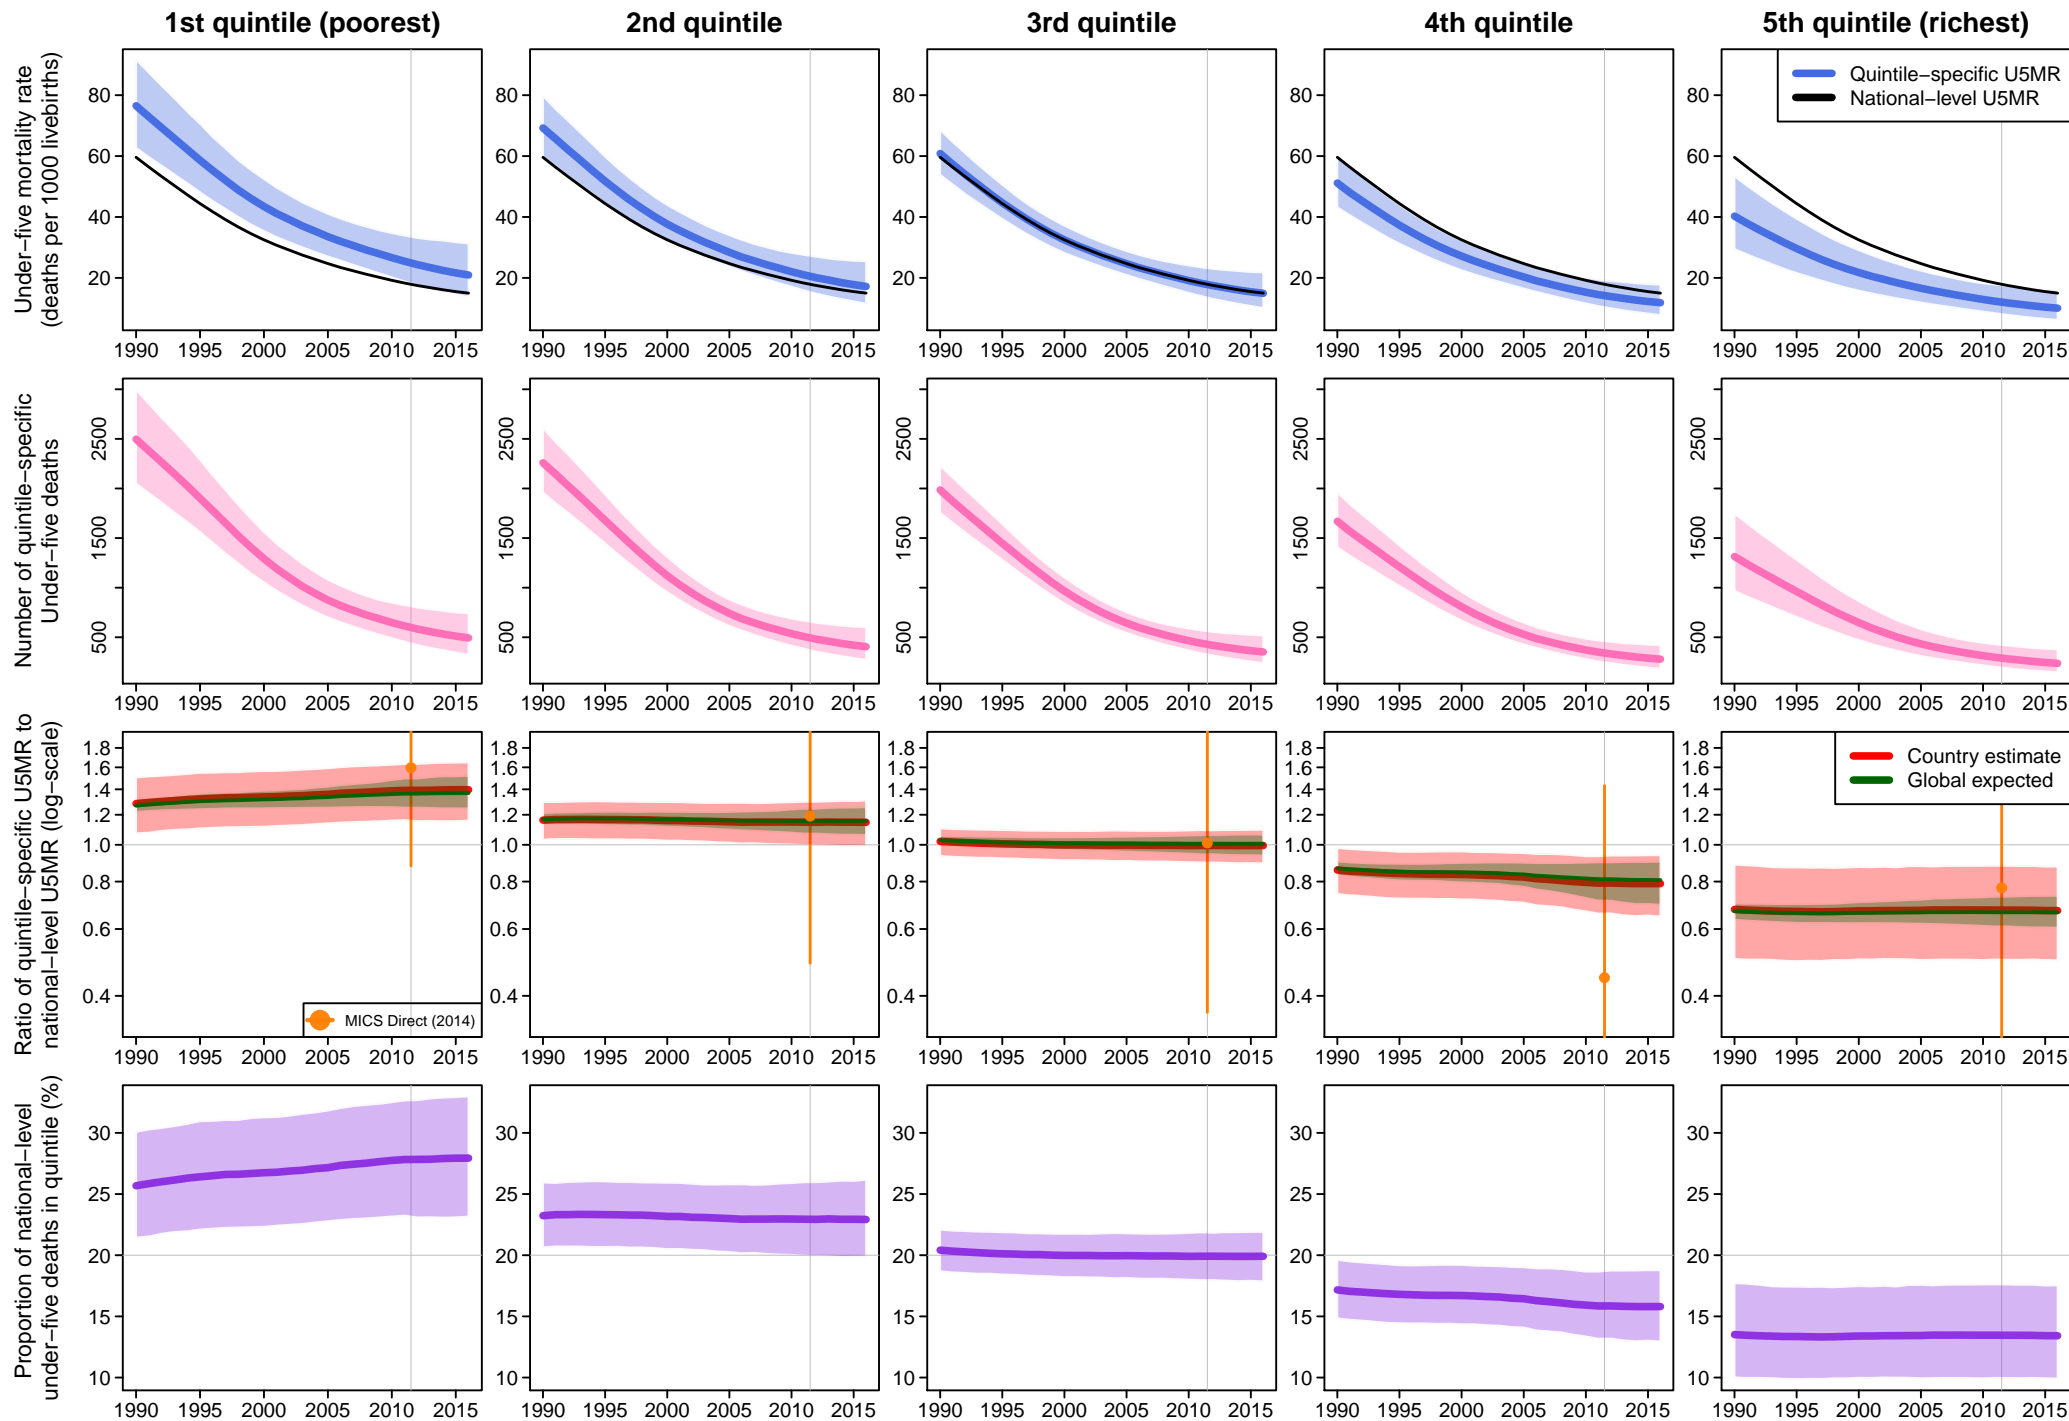



# Equatorial Guinea

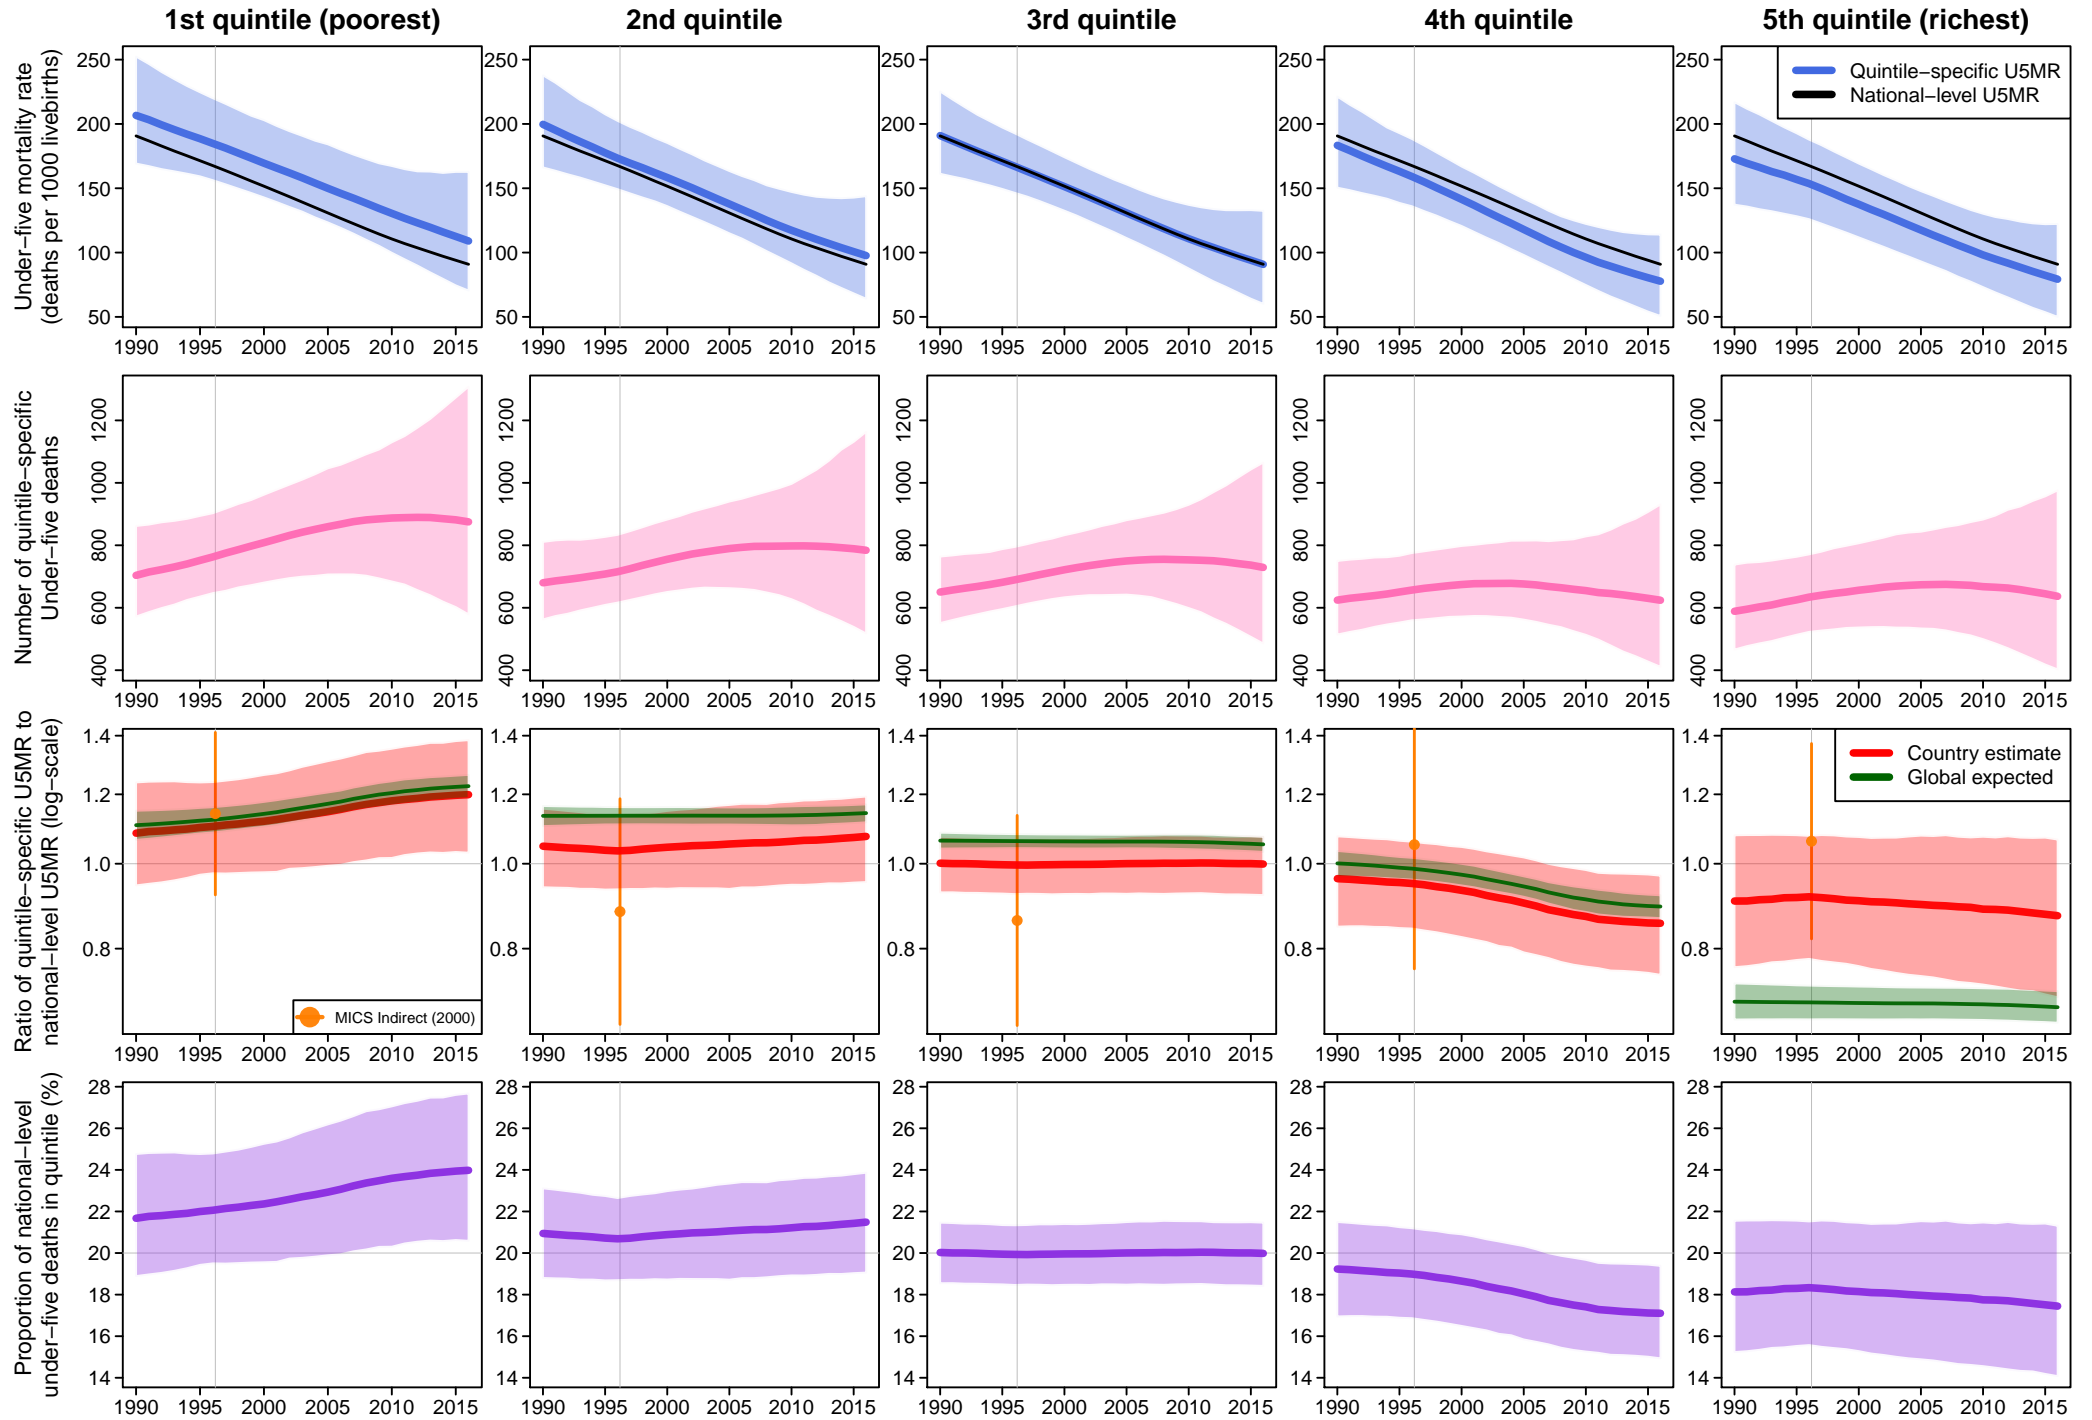

# Eritrea

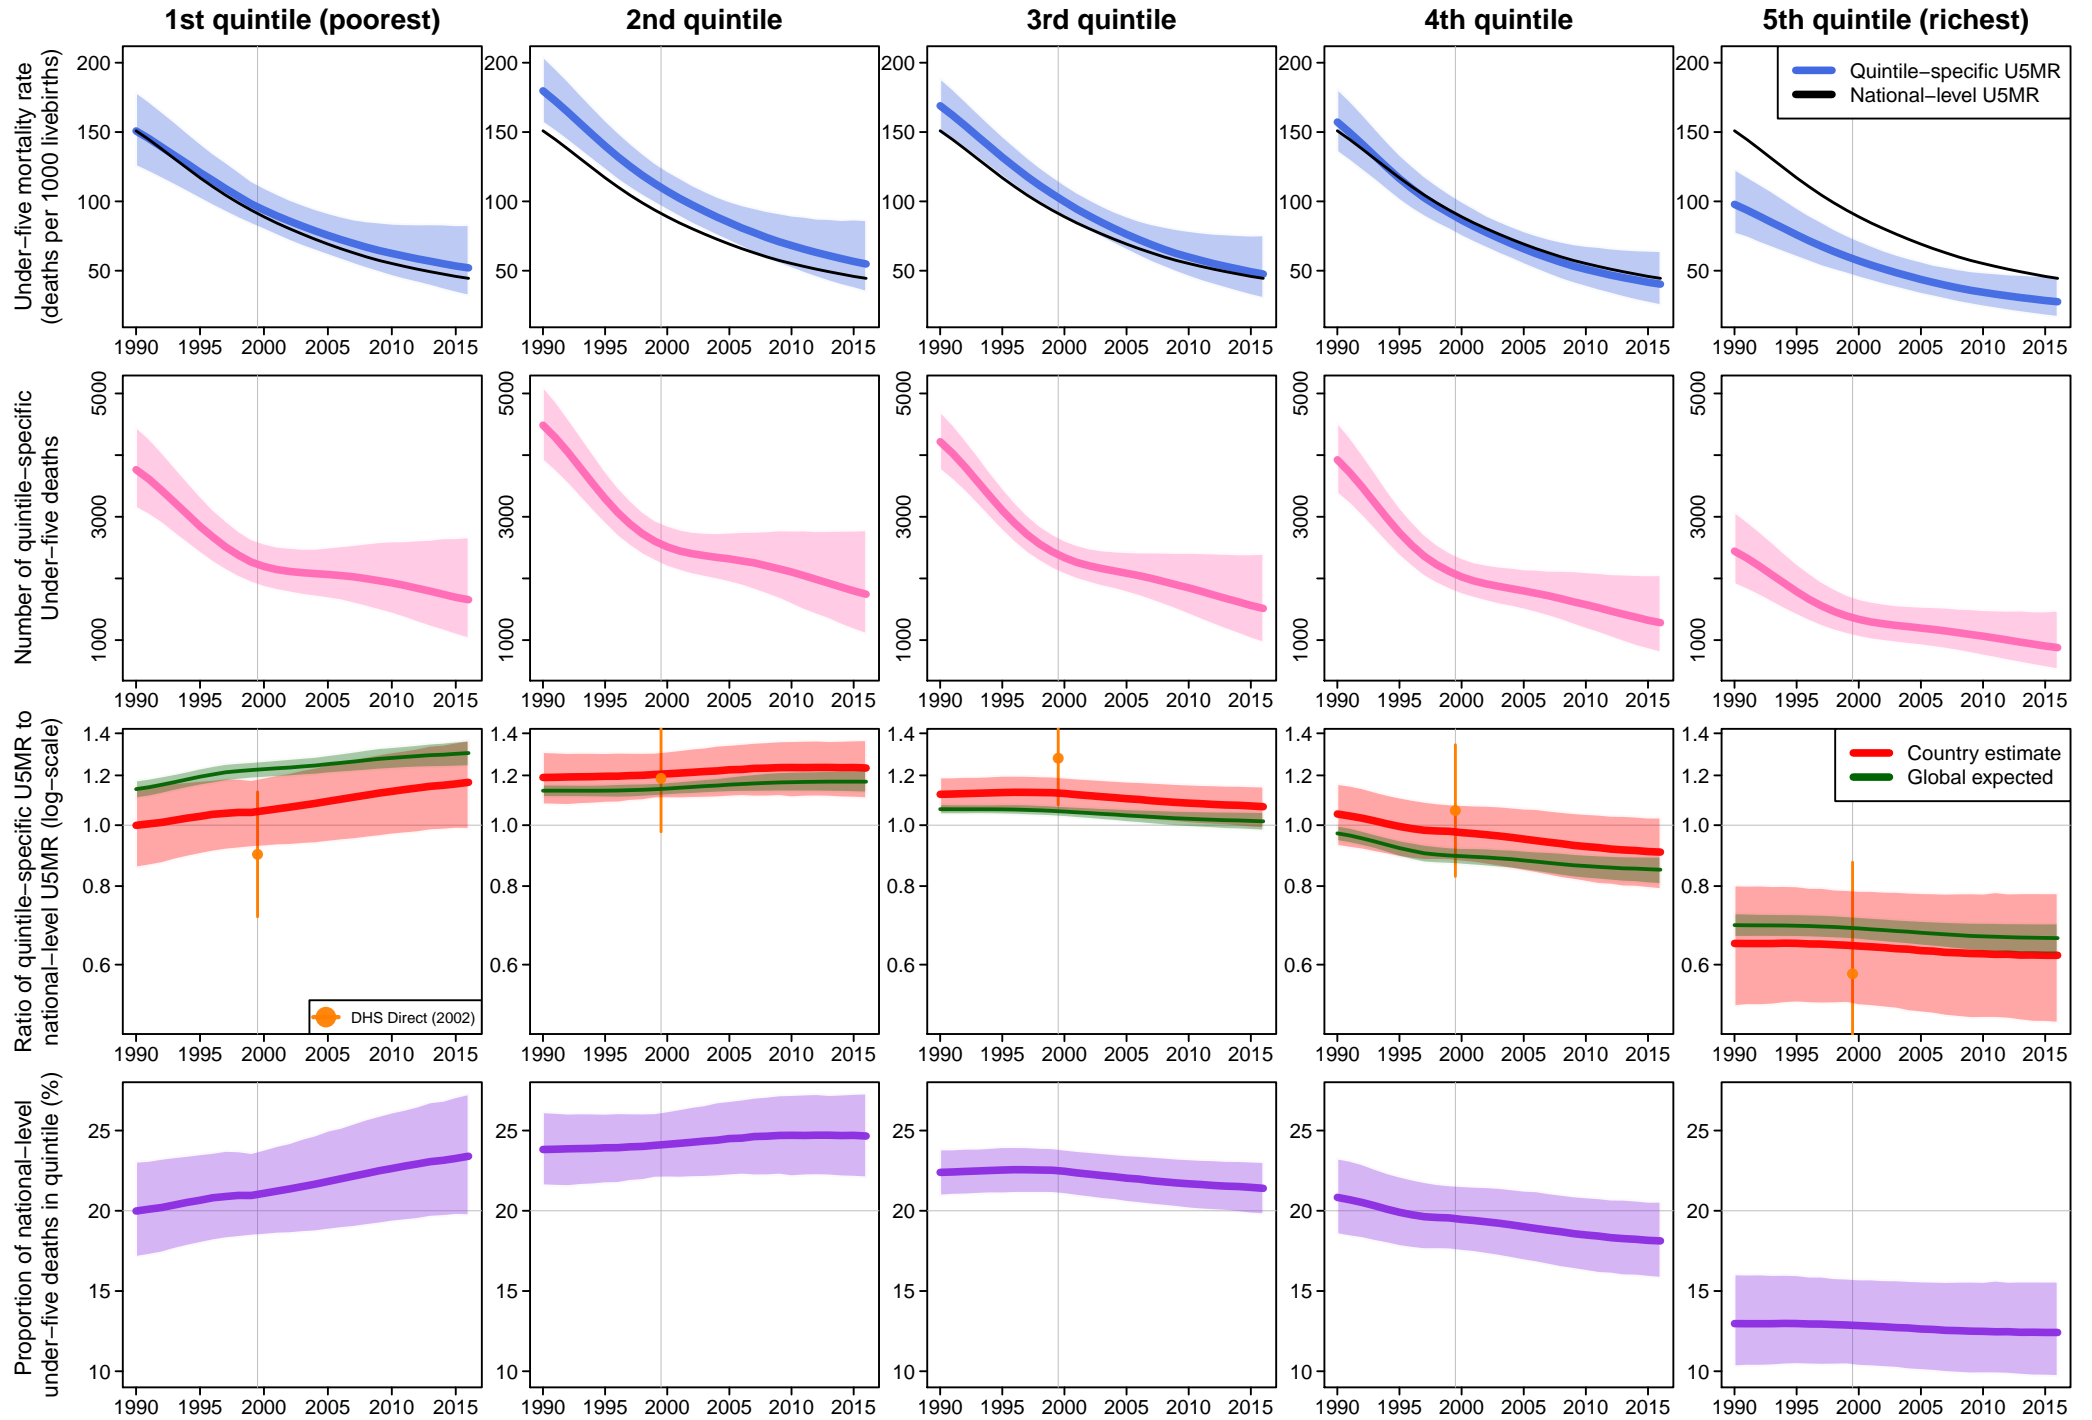

# Ethiopia

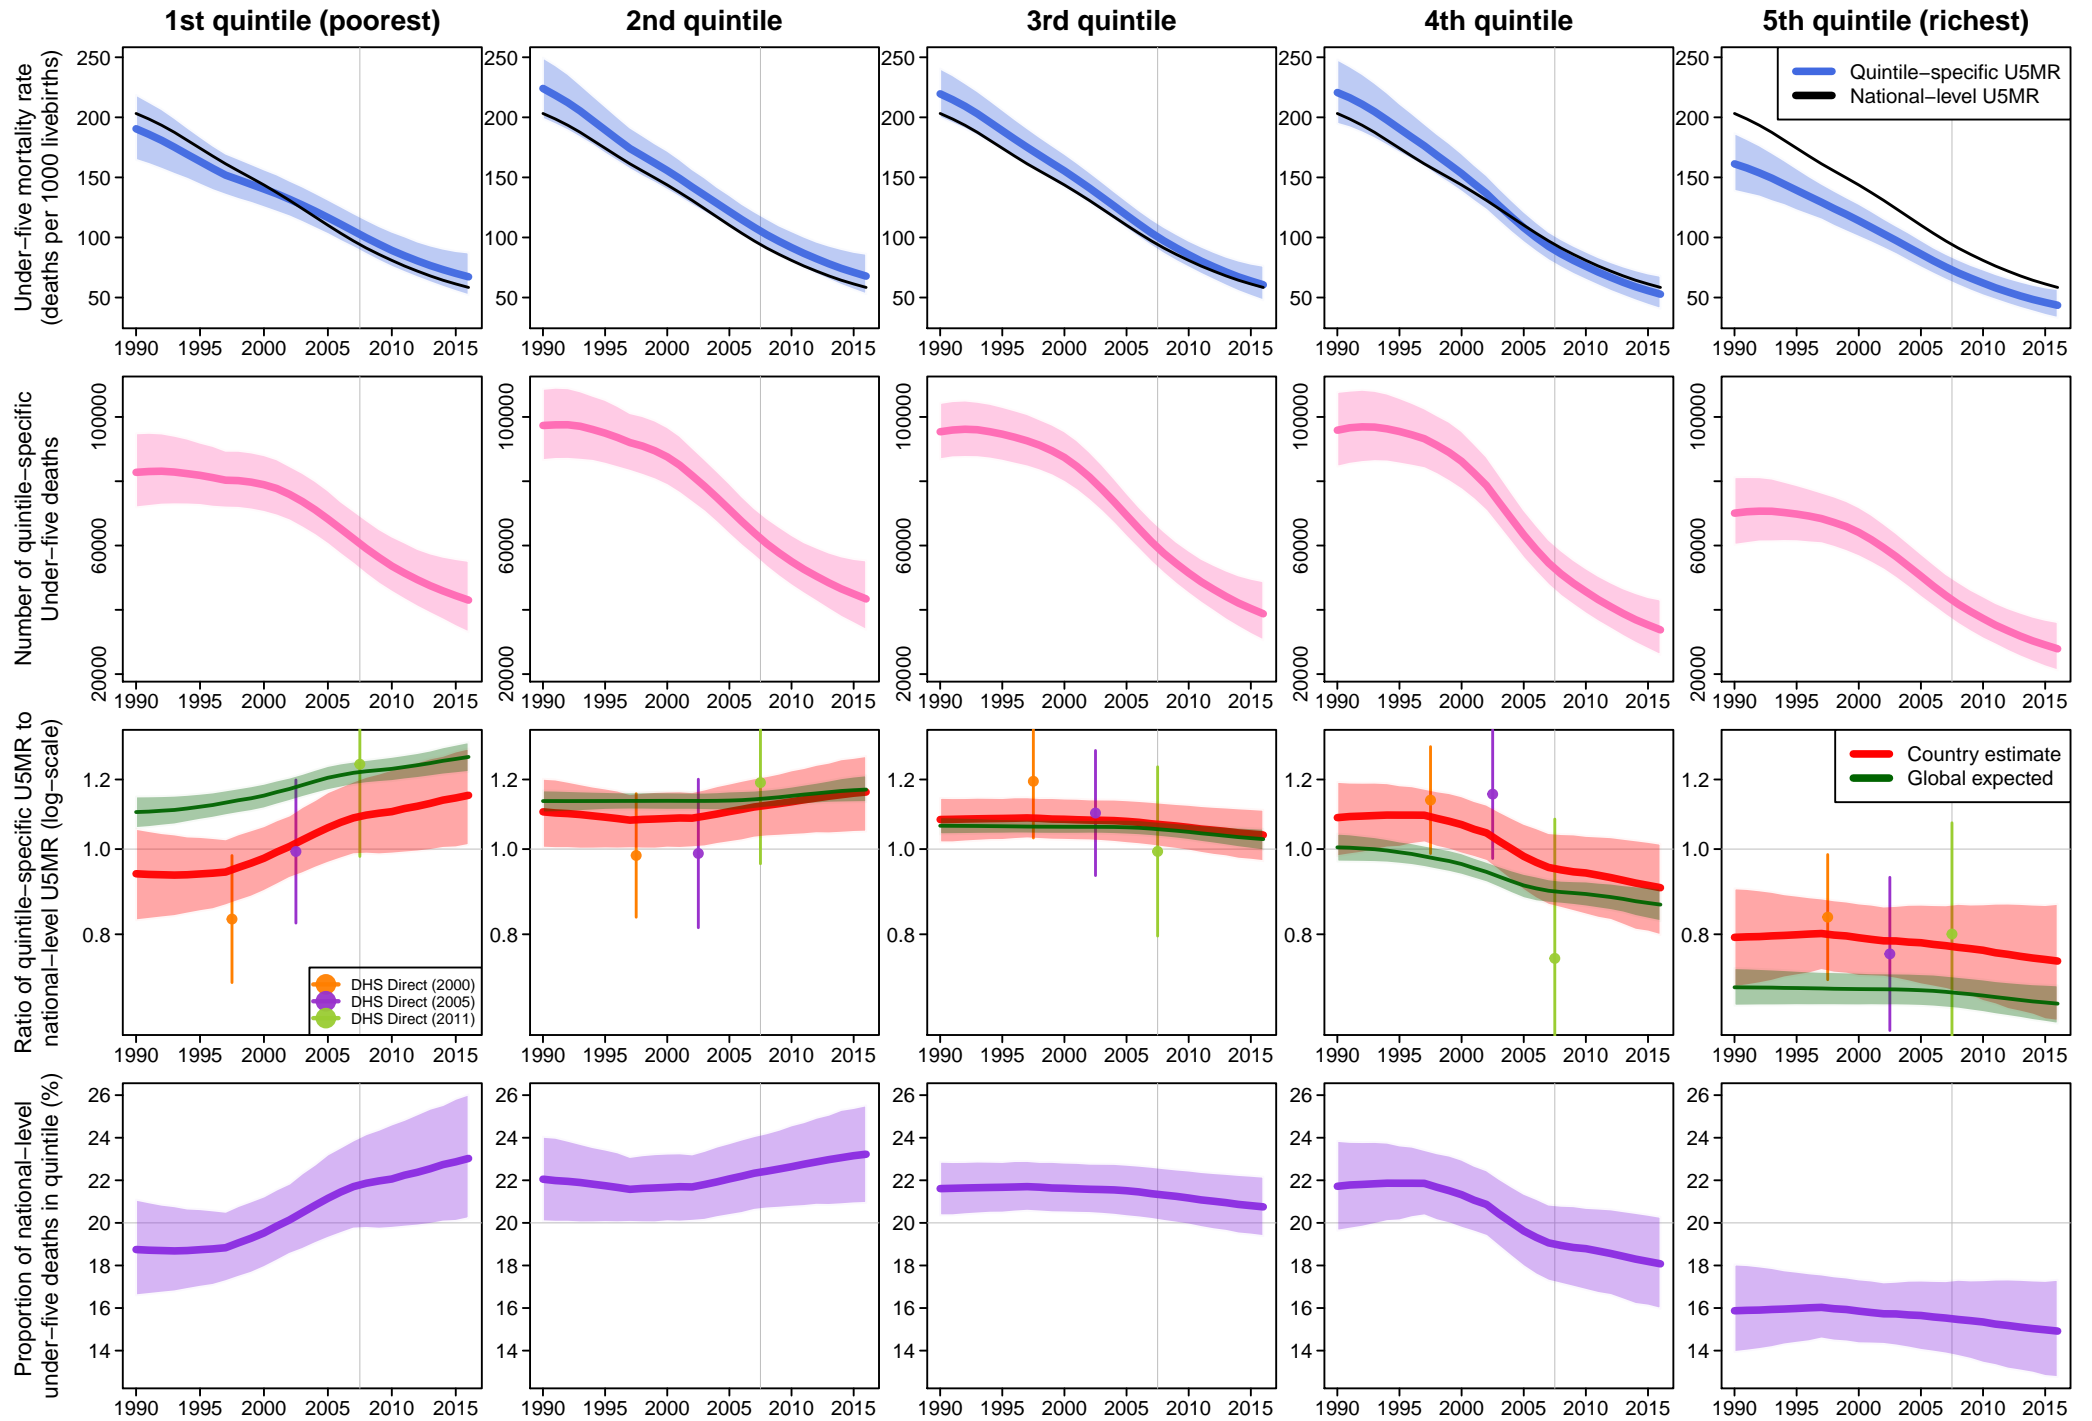

# Gabon

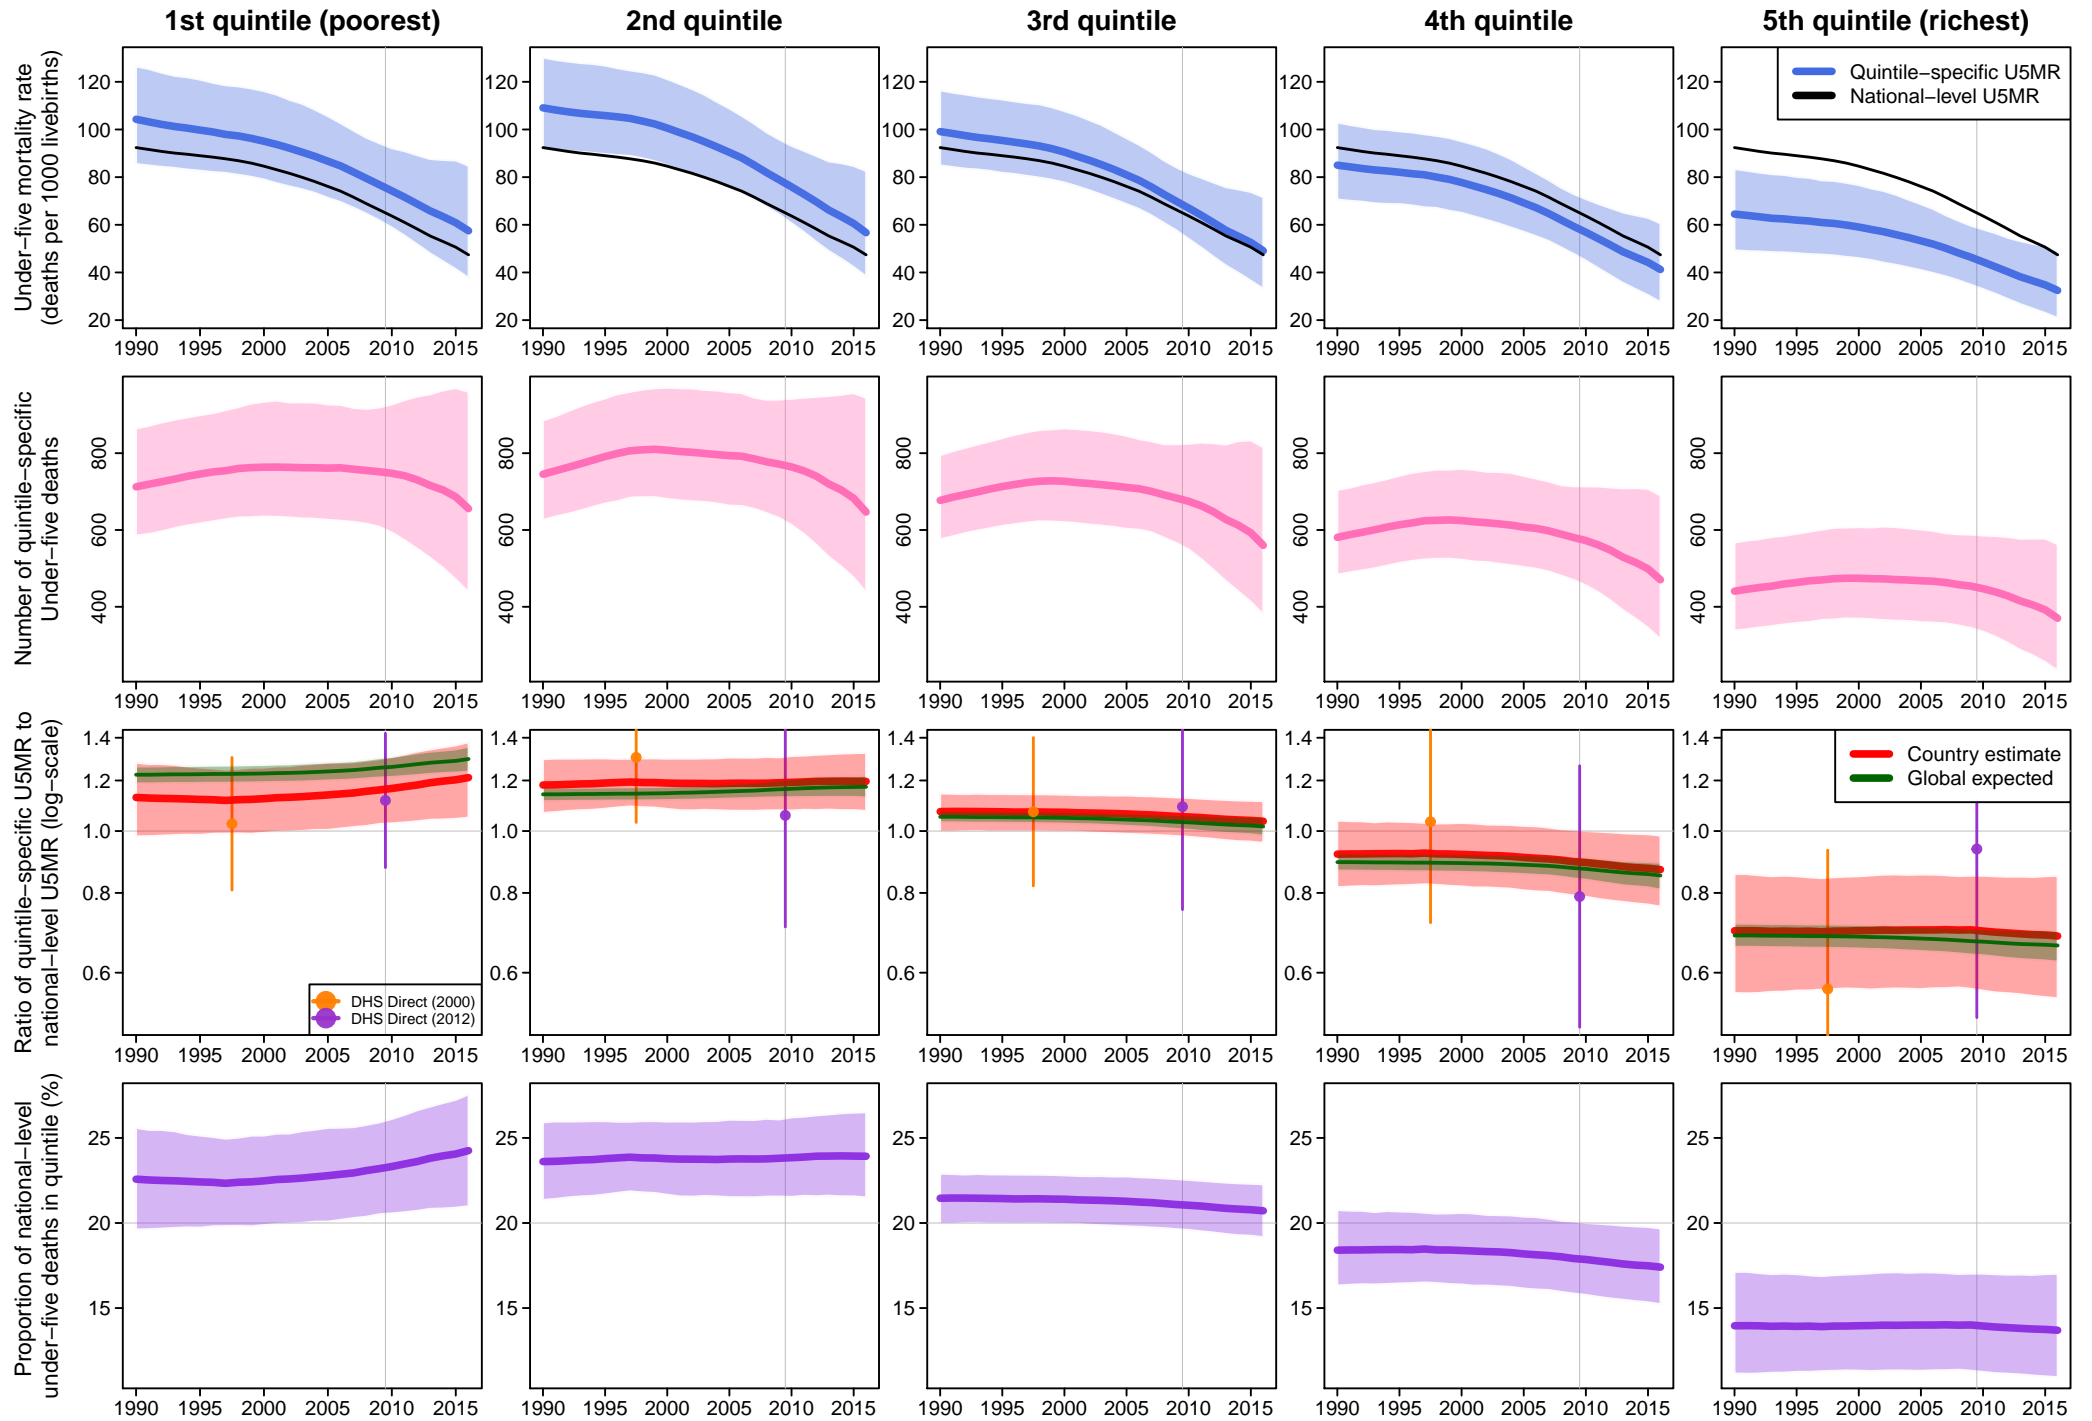

# Georgia

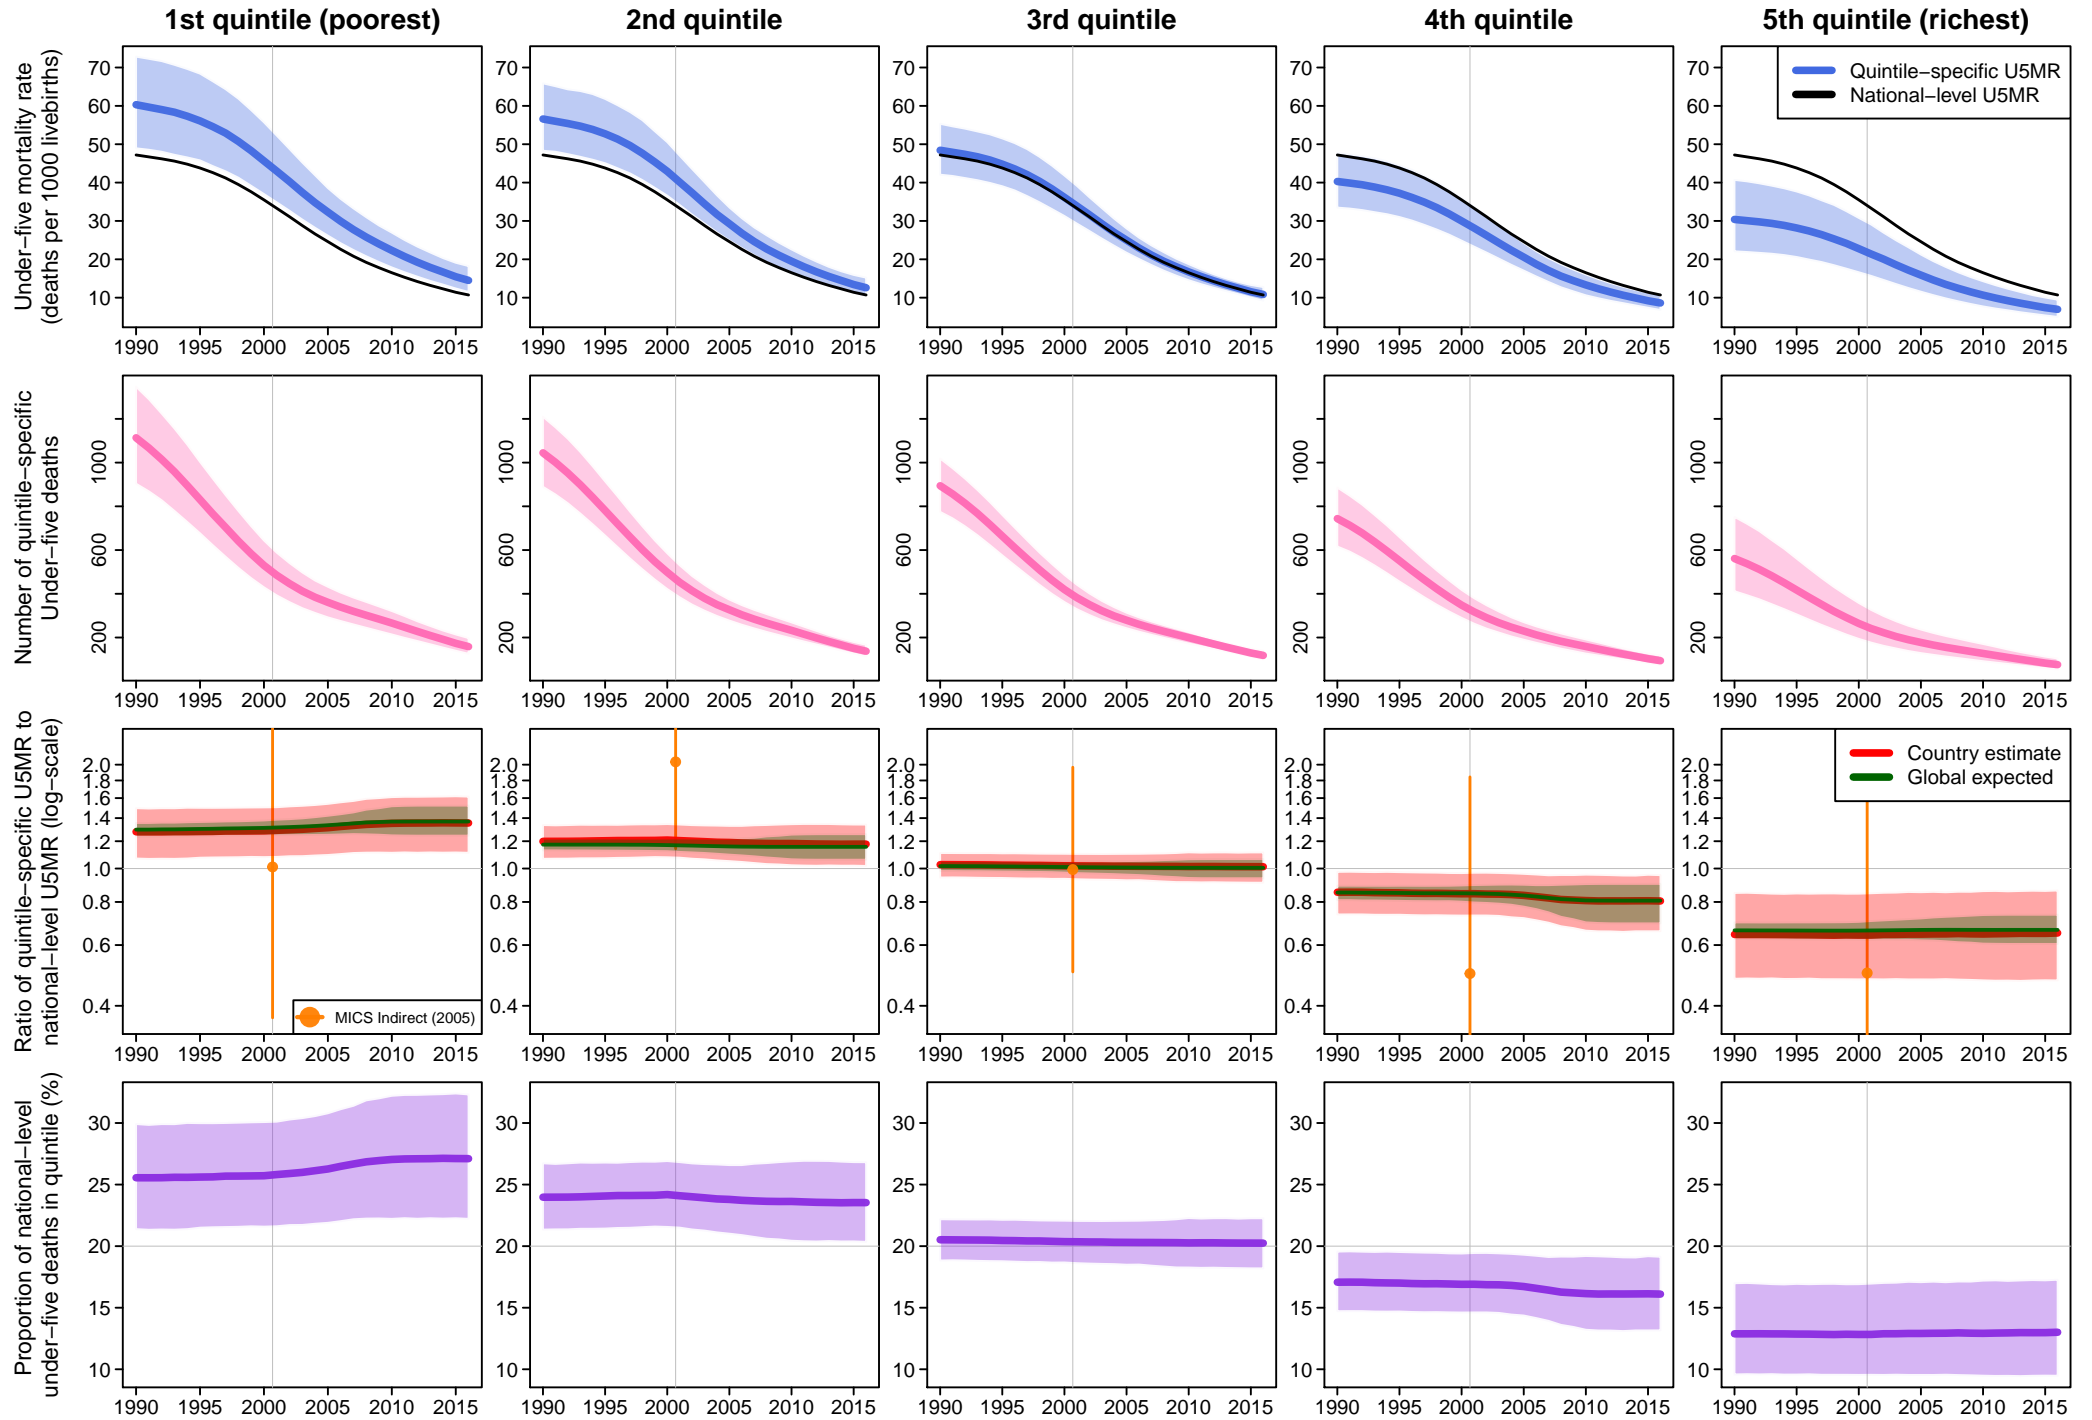

# Ghana

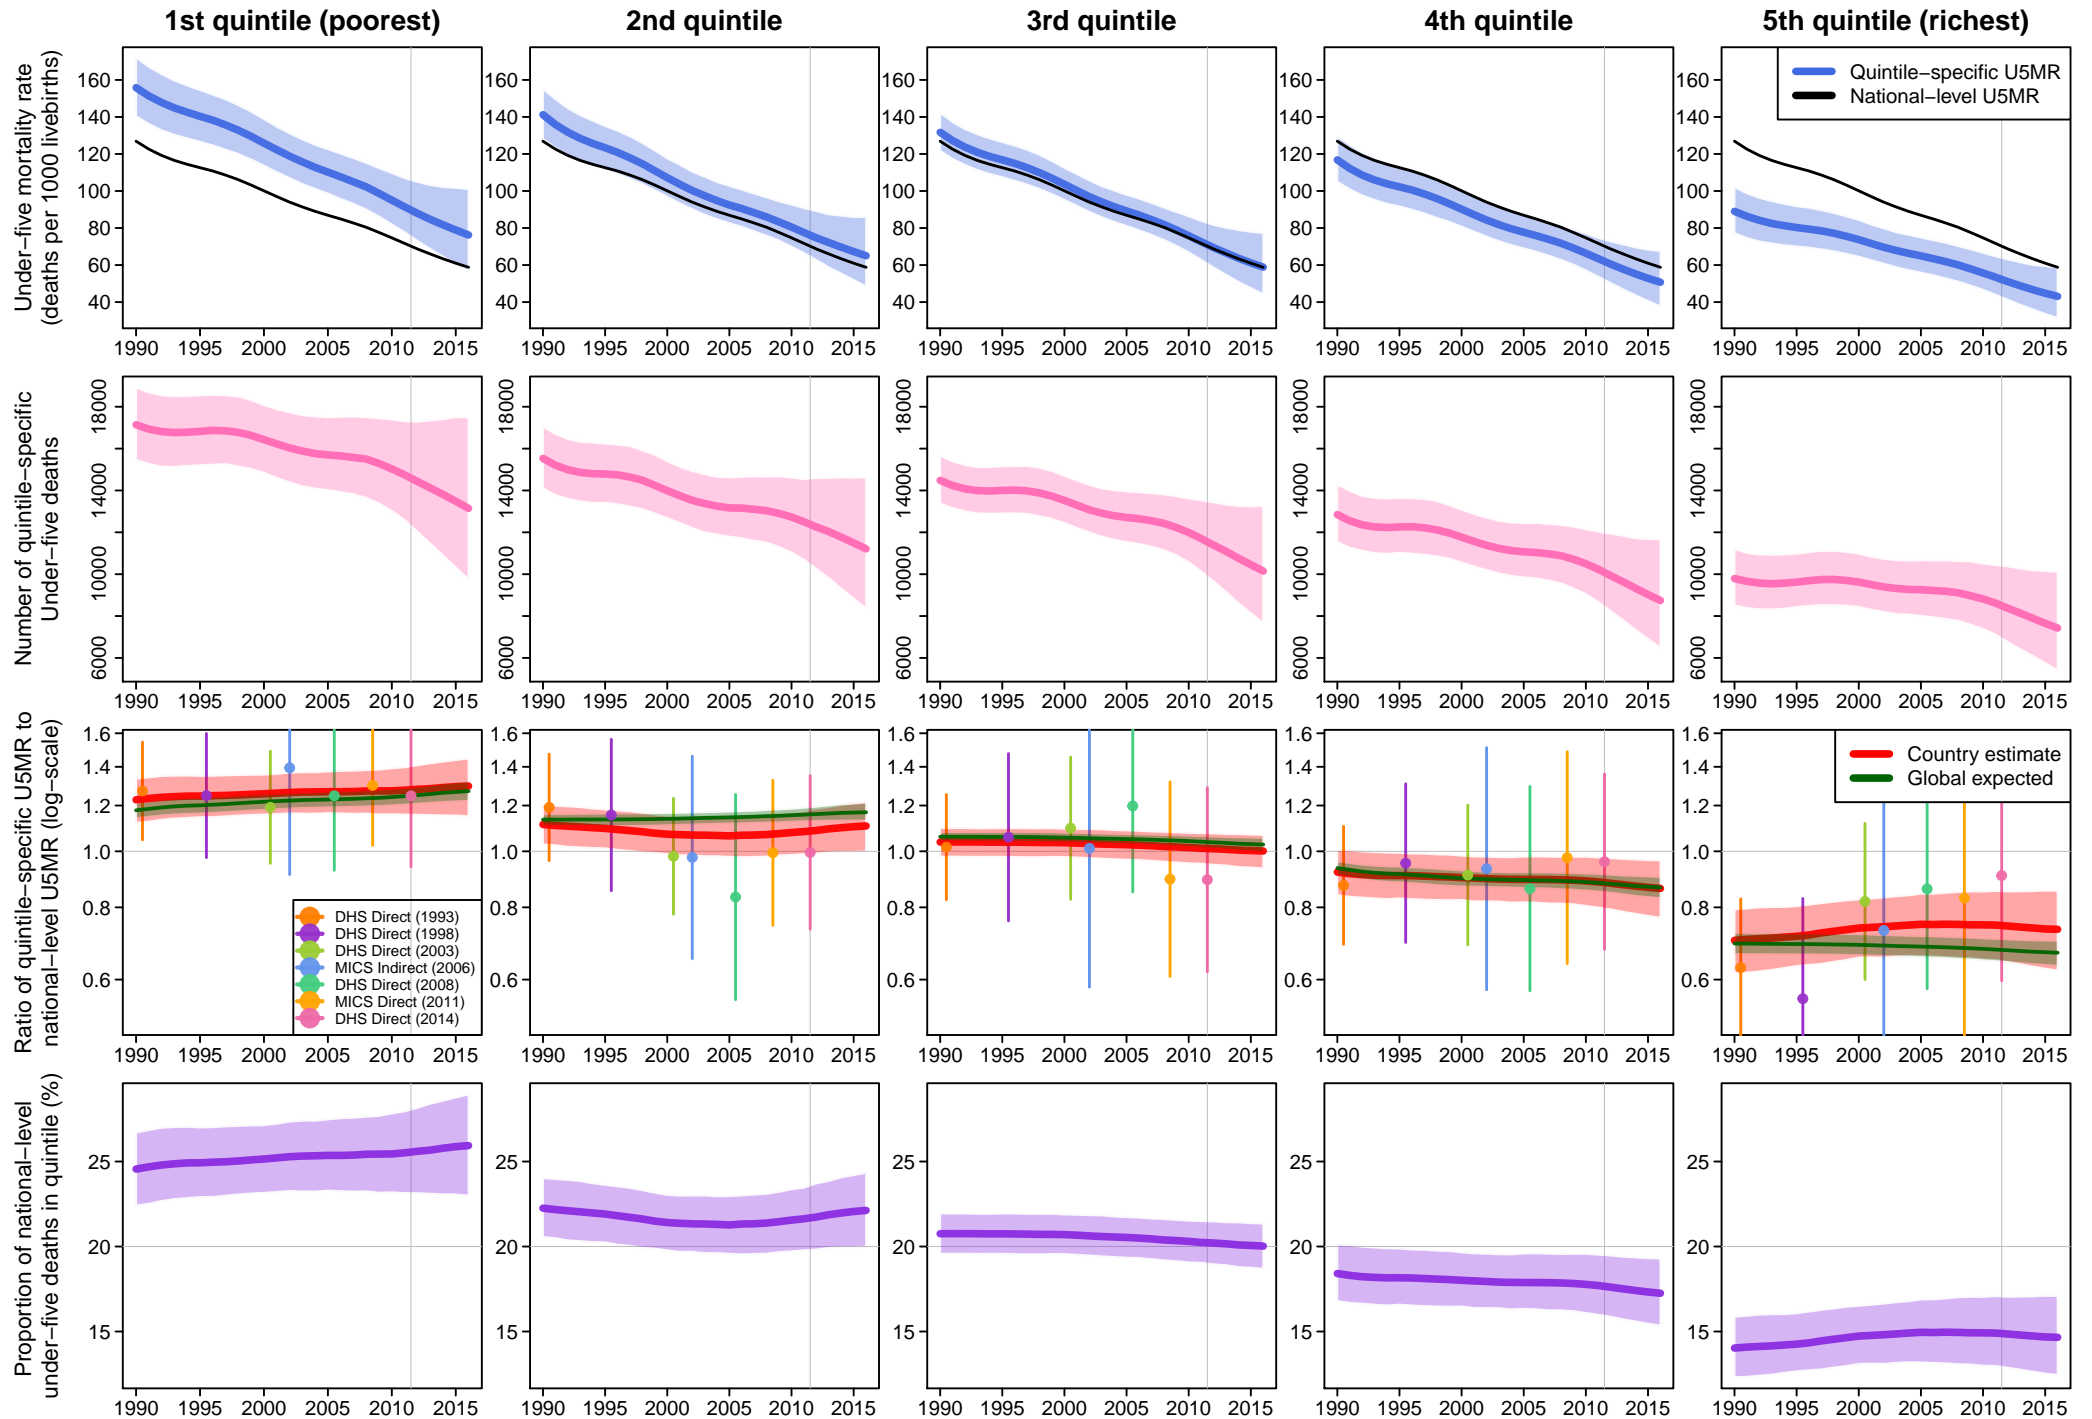

# Guatemala

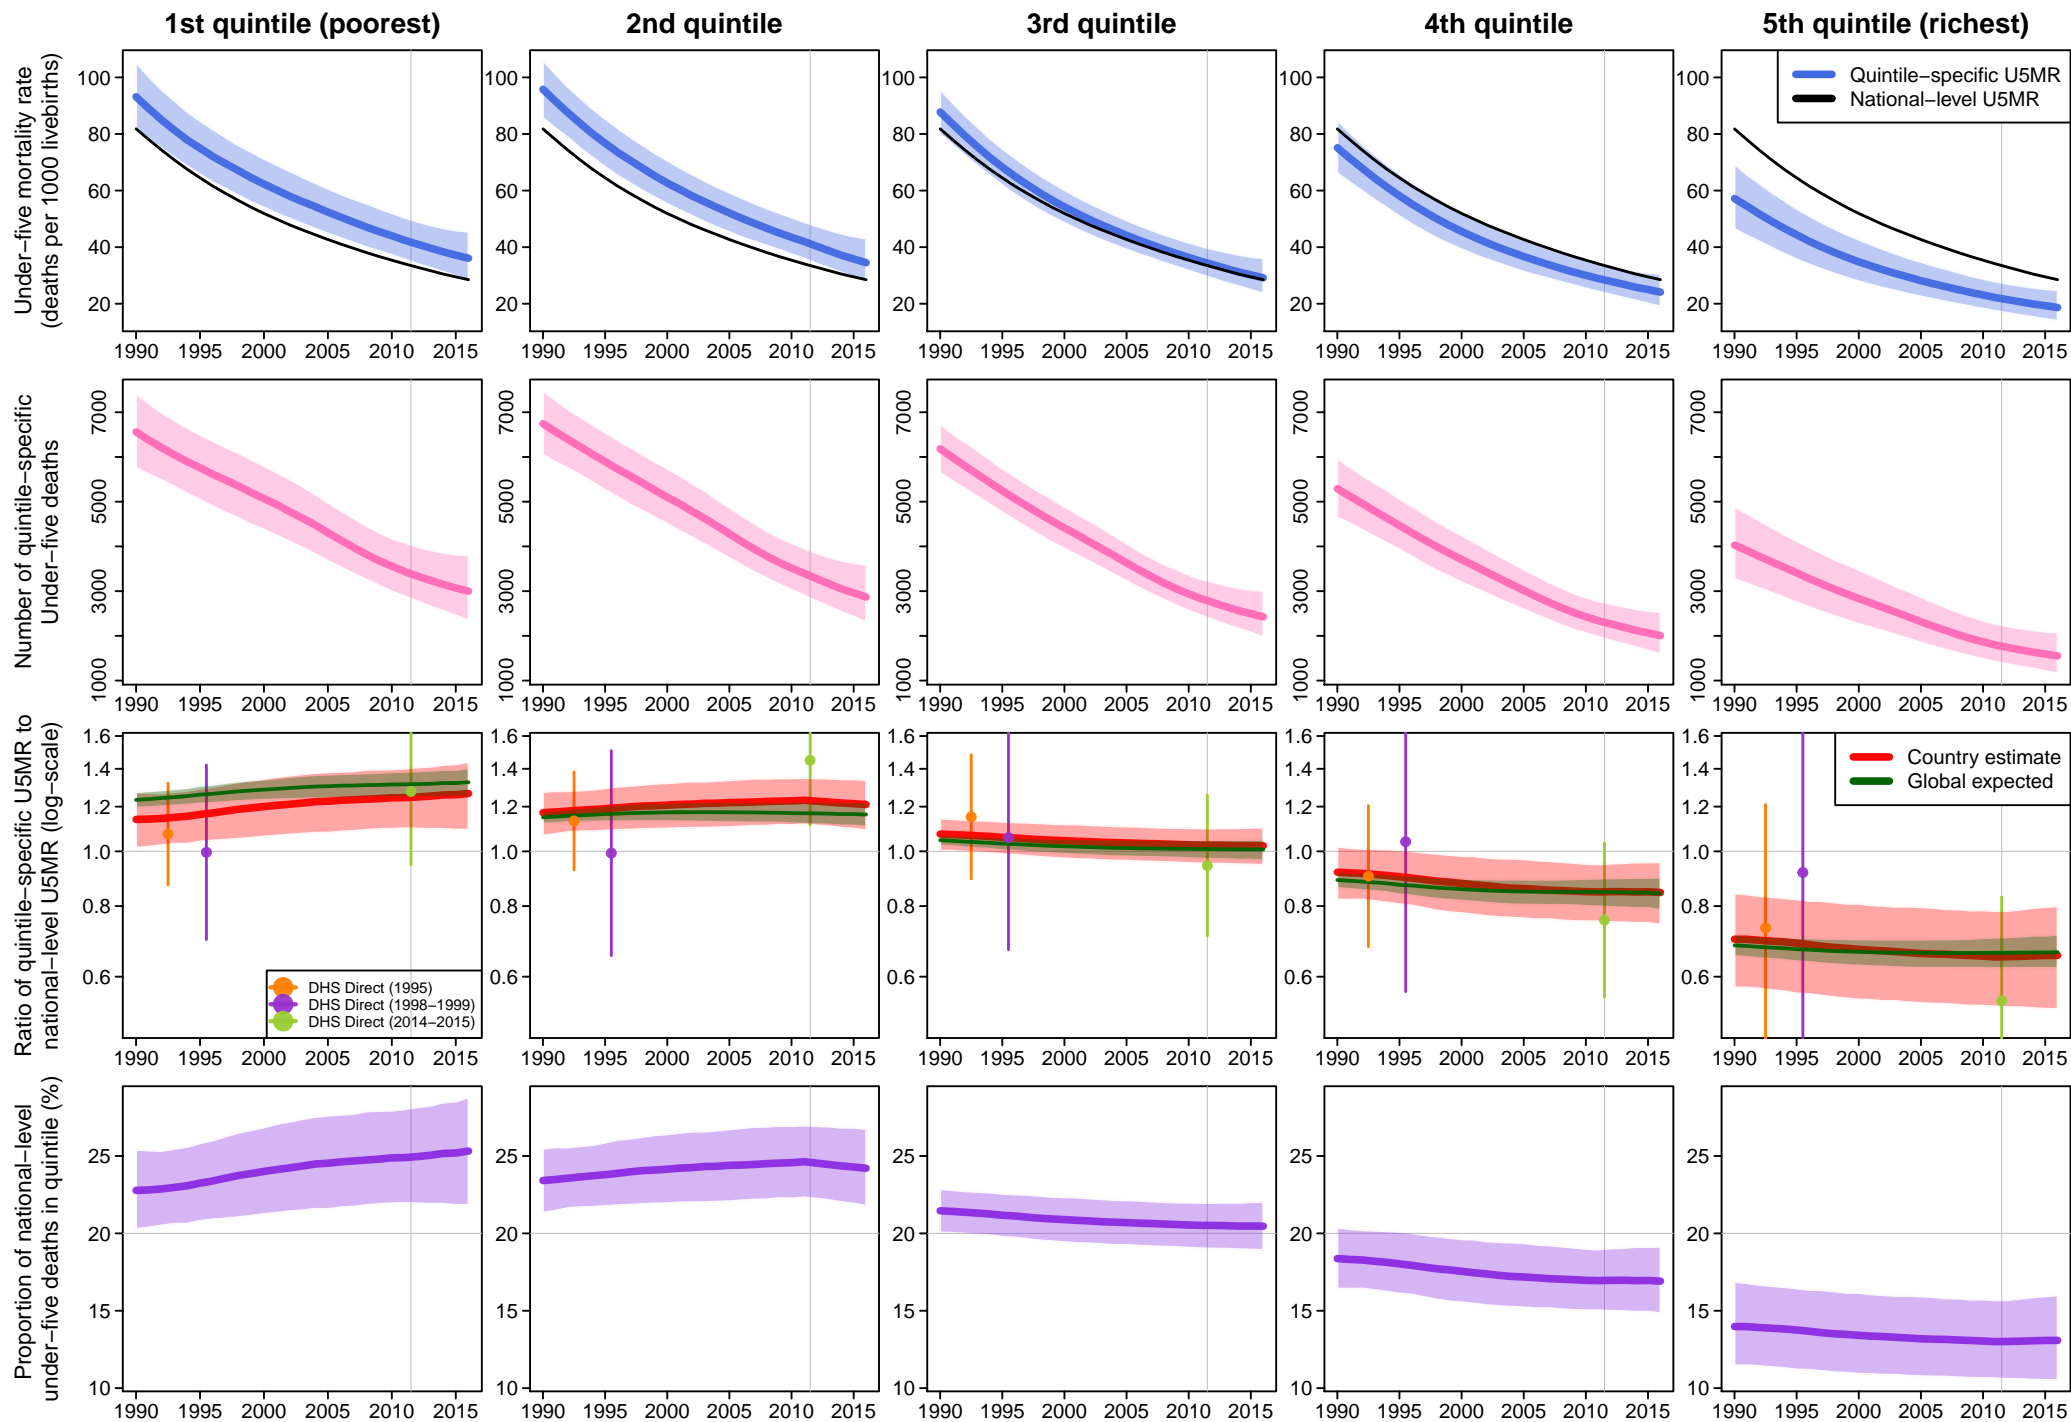

# Guinea

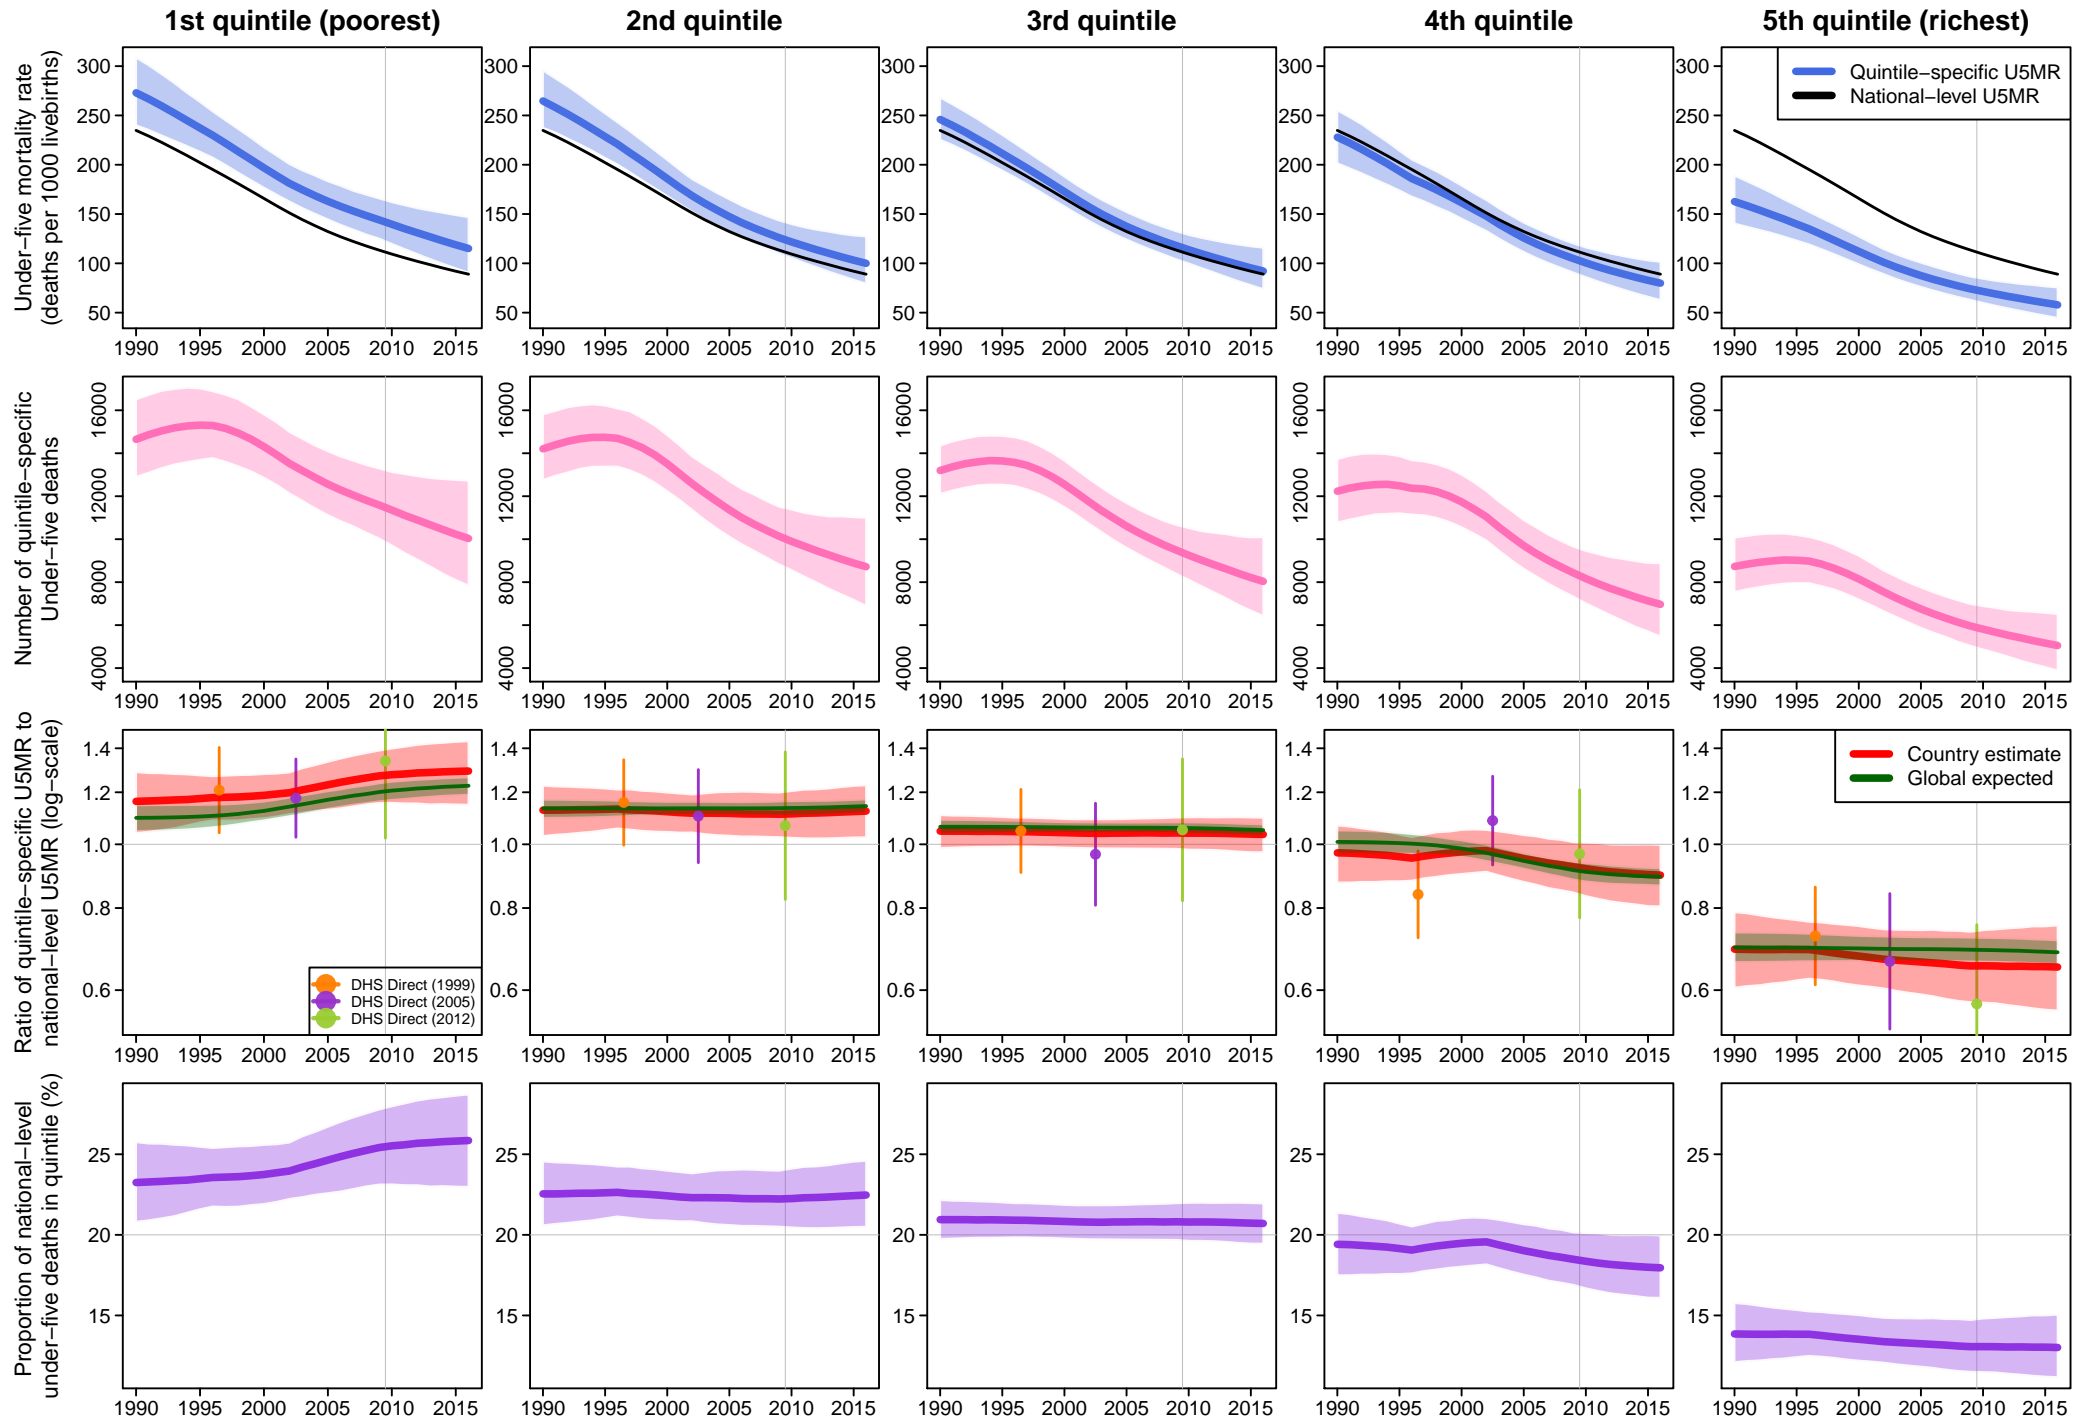



# Guinea-Bissau

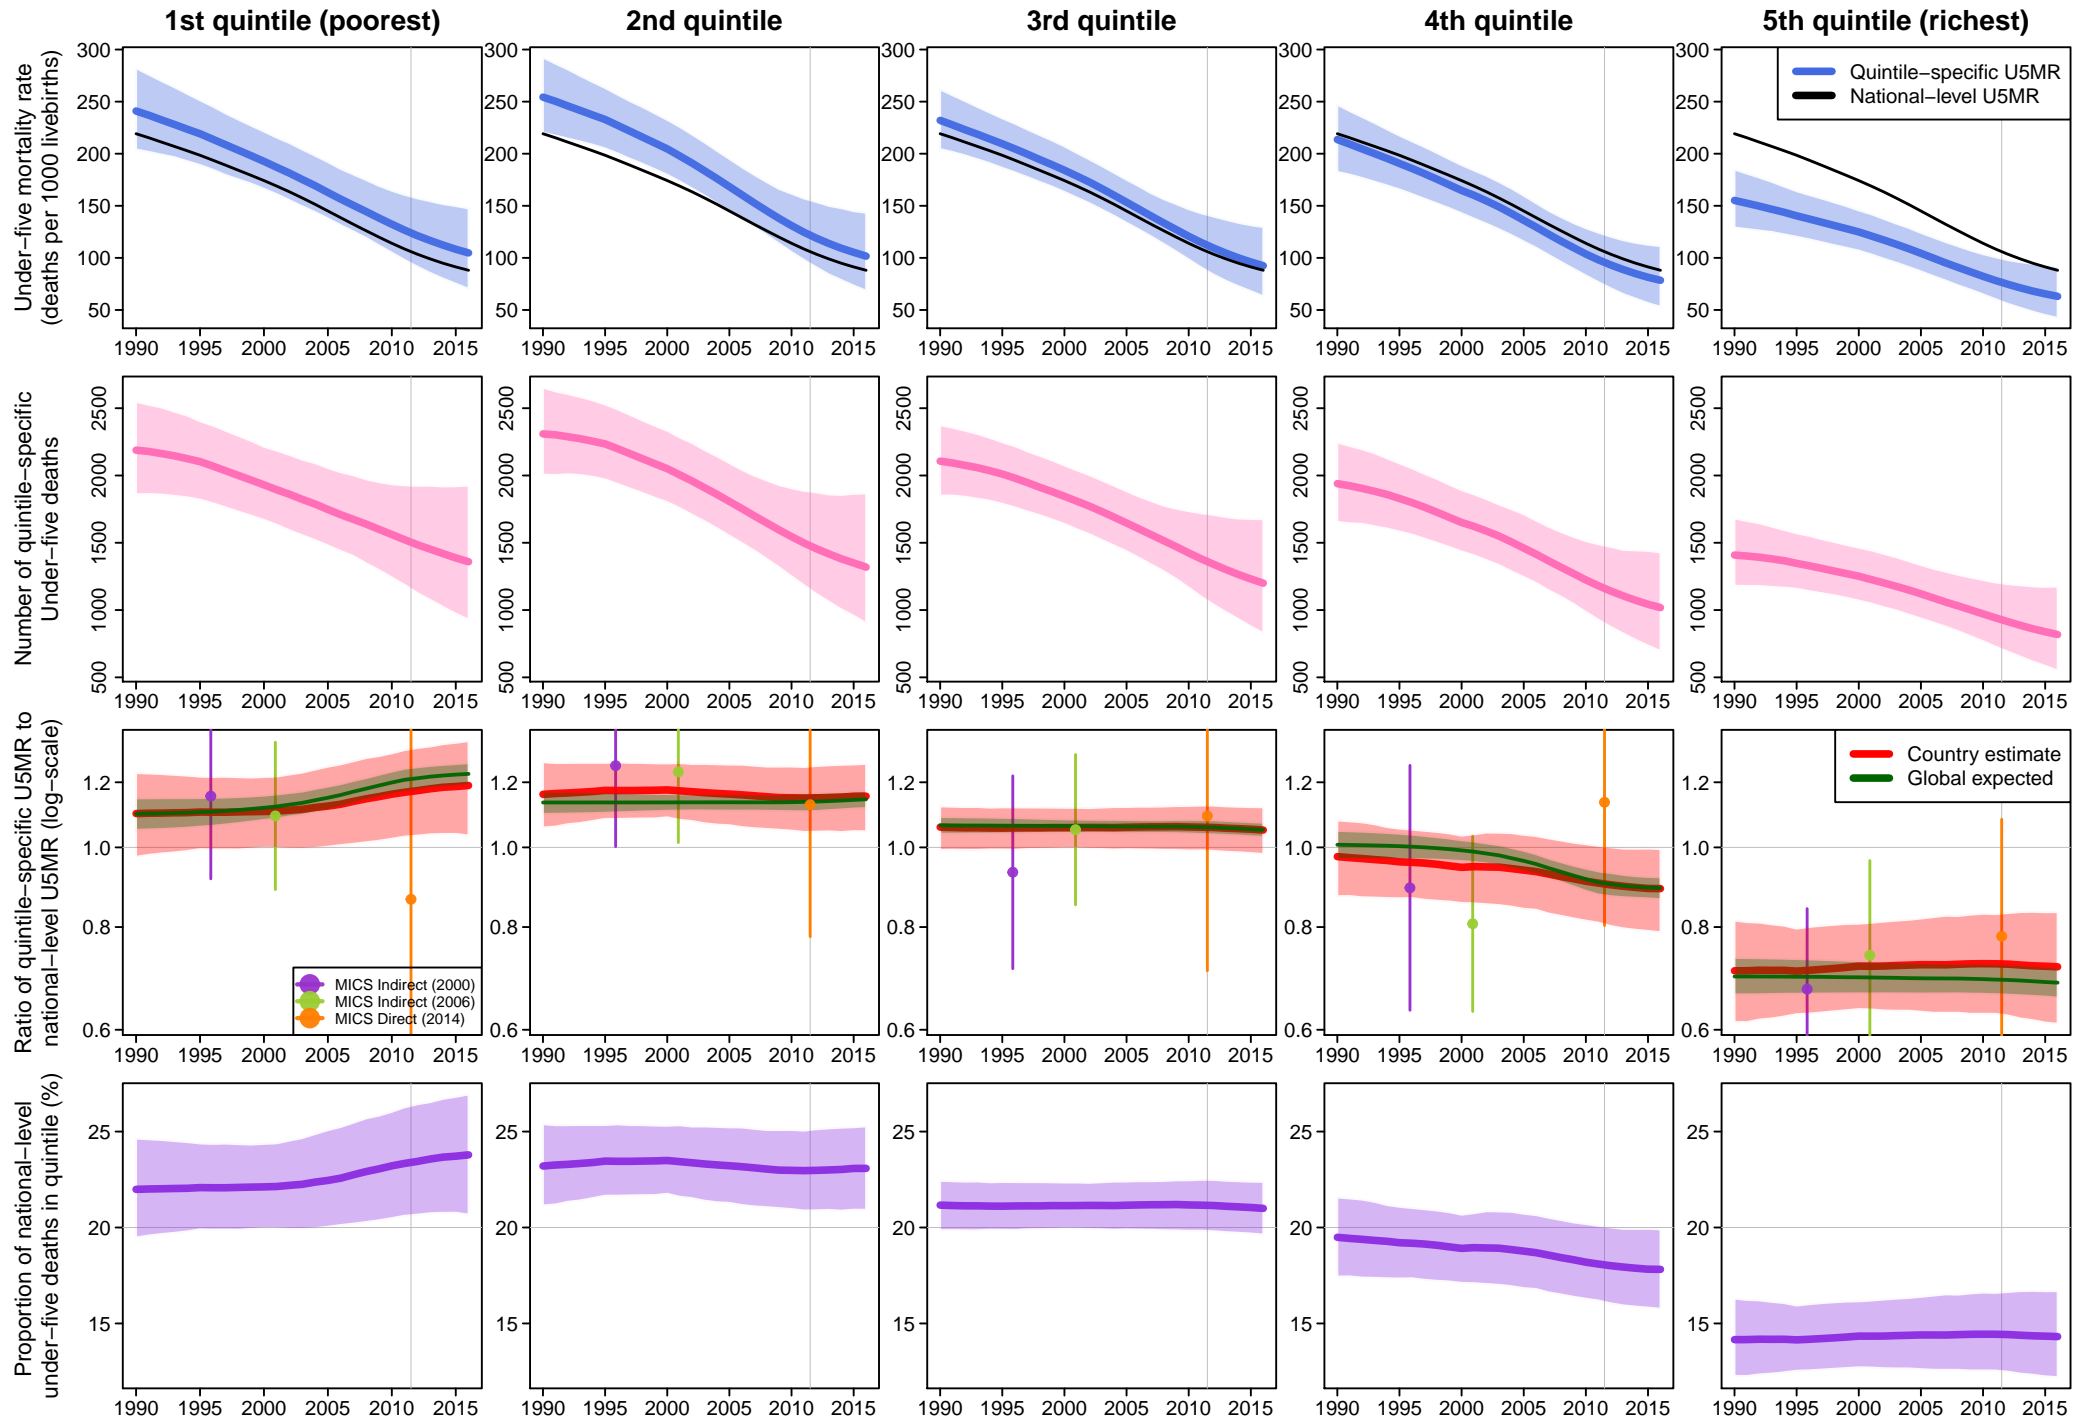

# Guyana

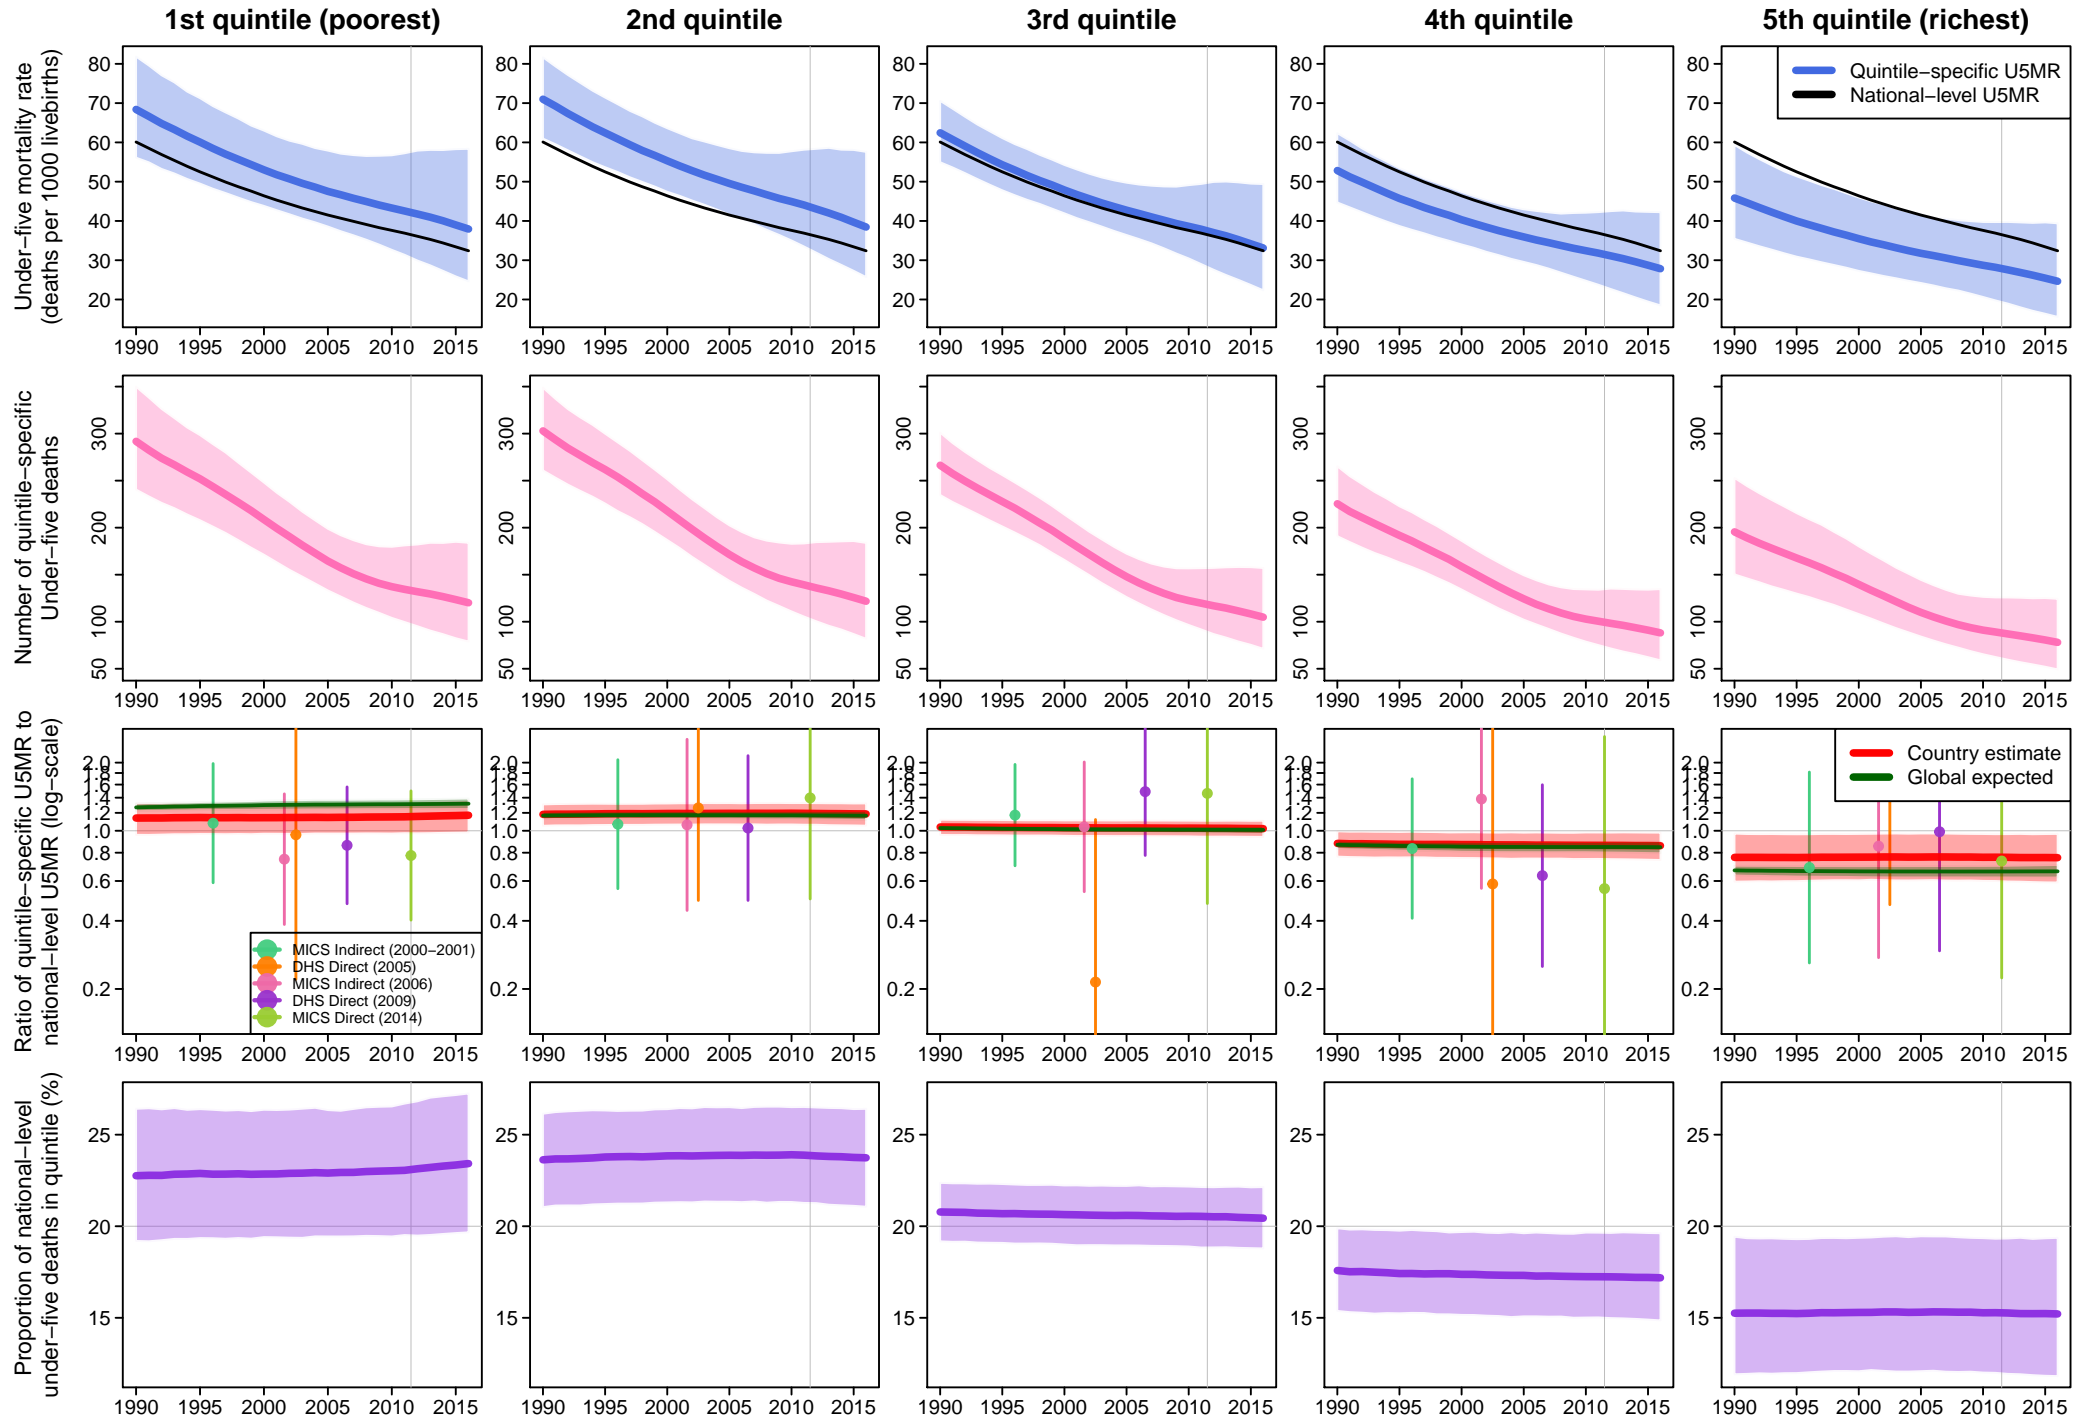

# Haiti

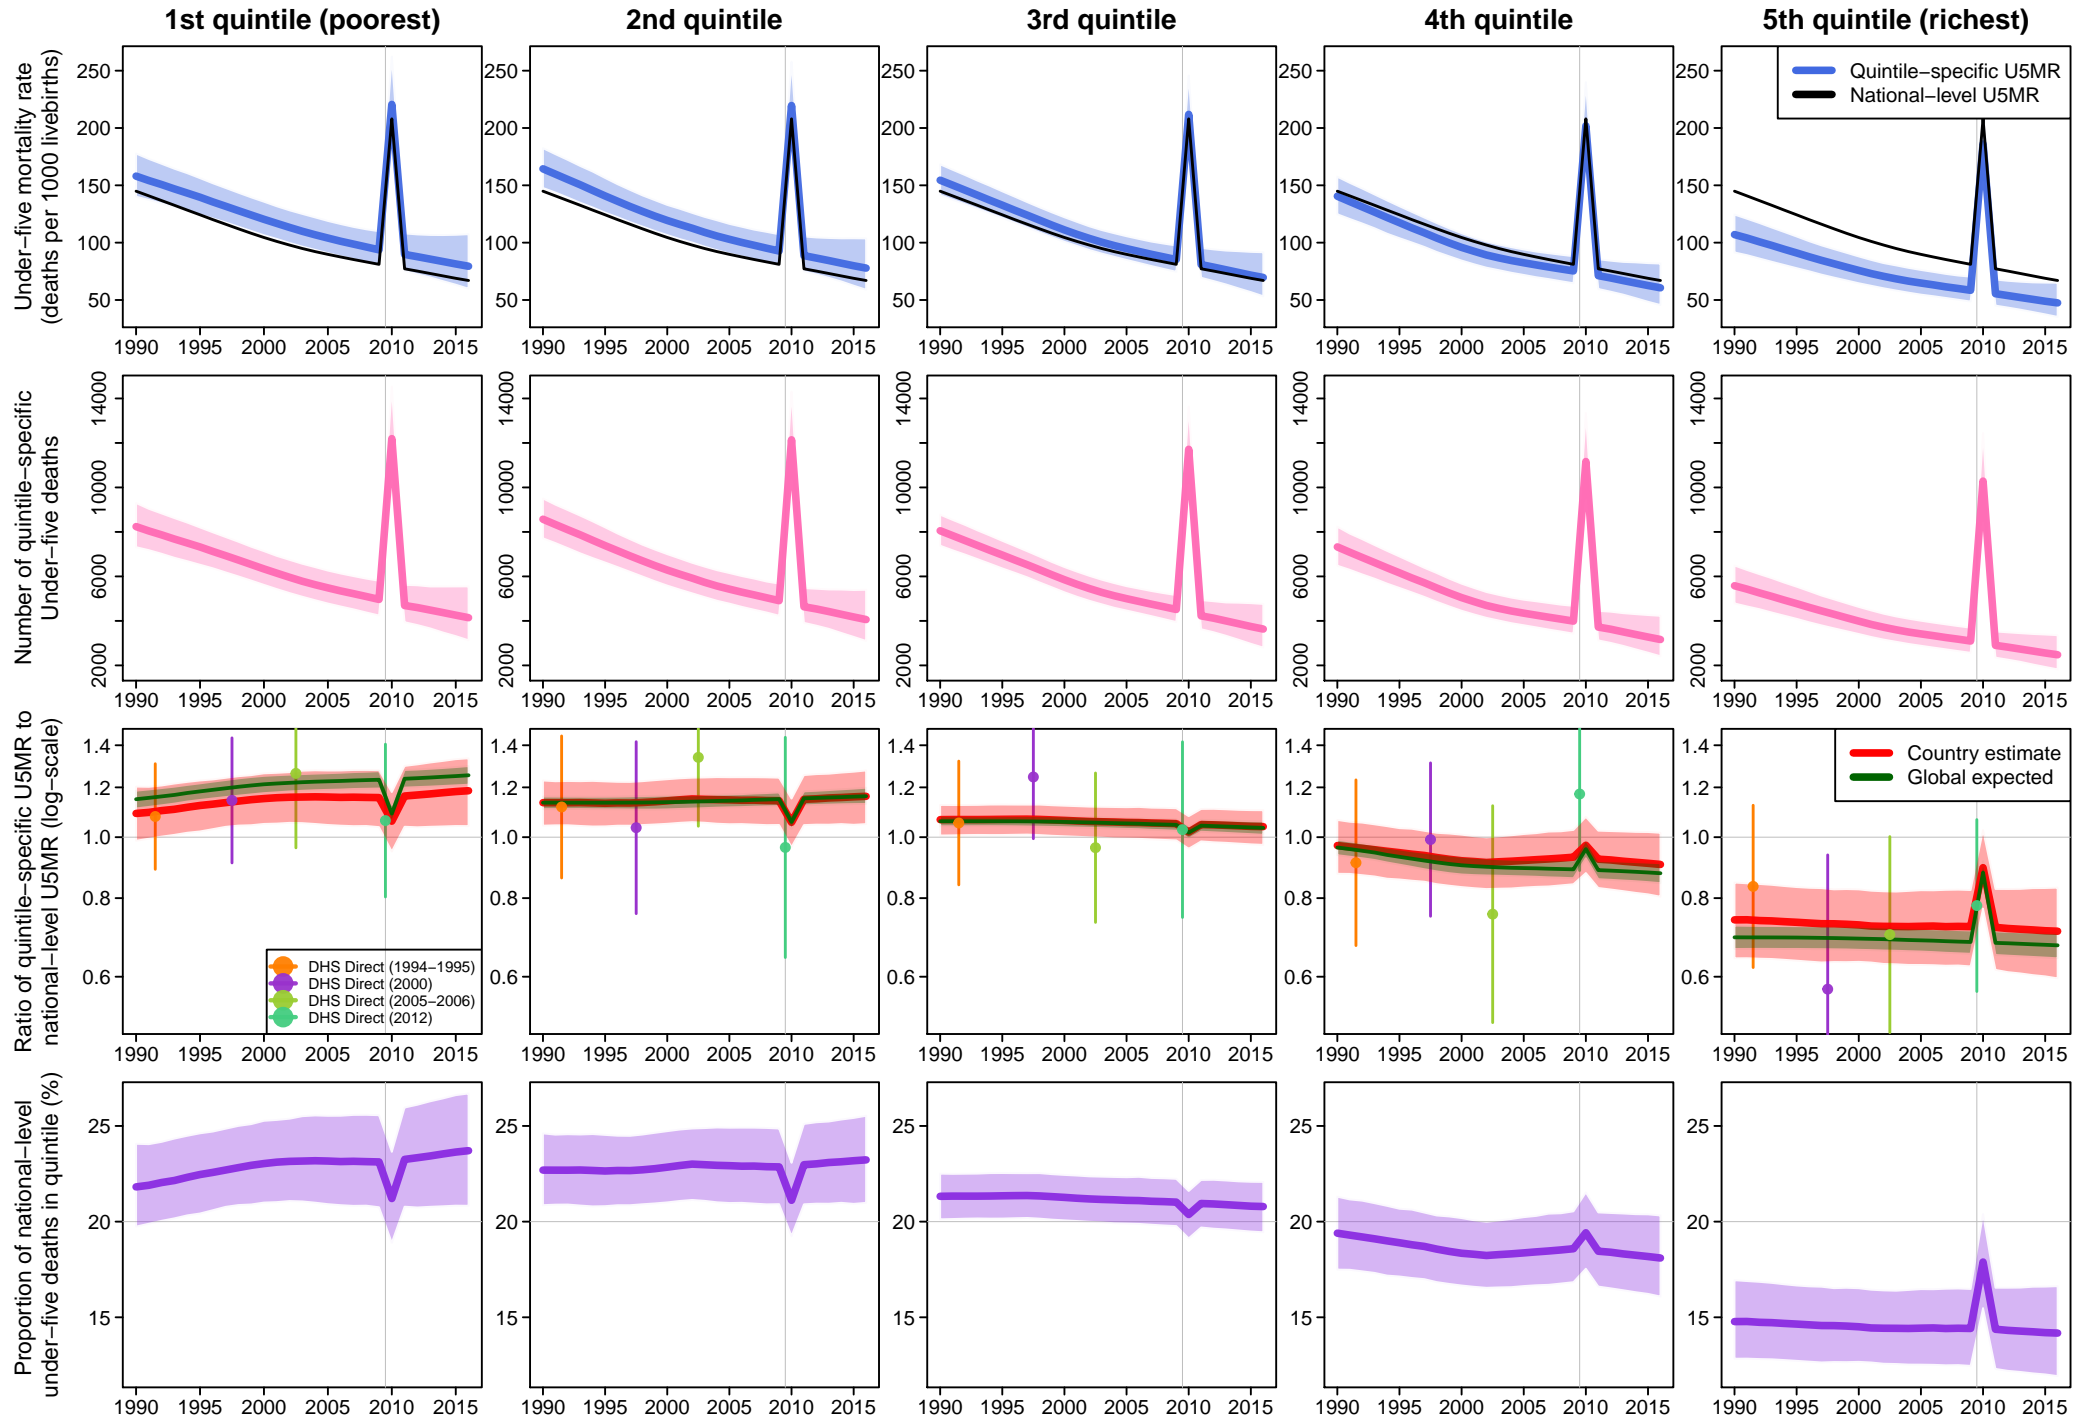

# Honduras

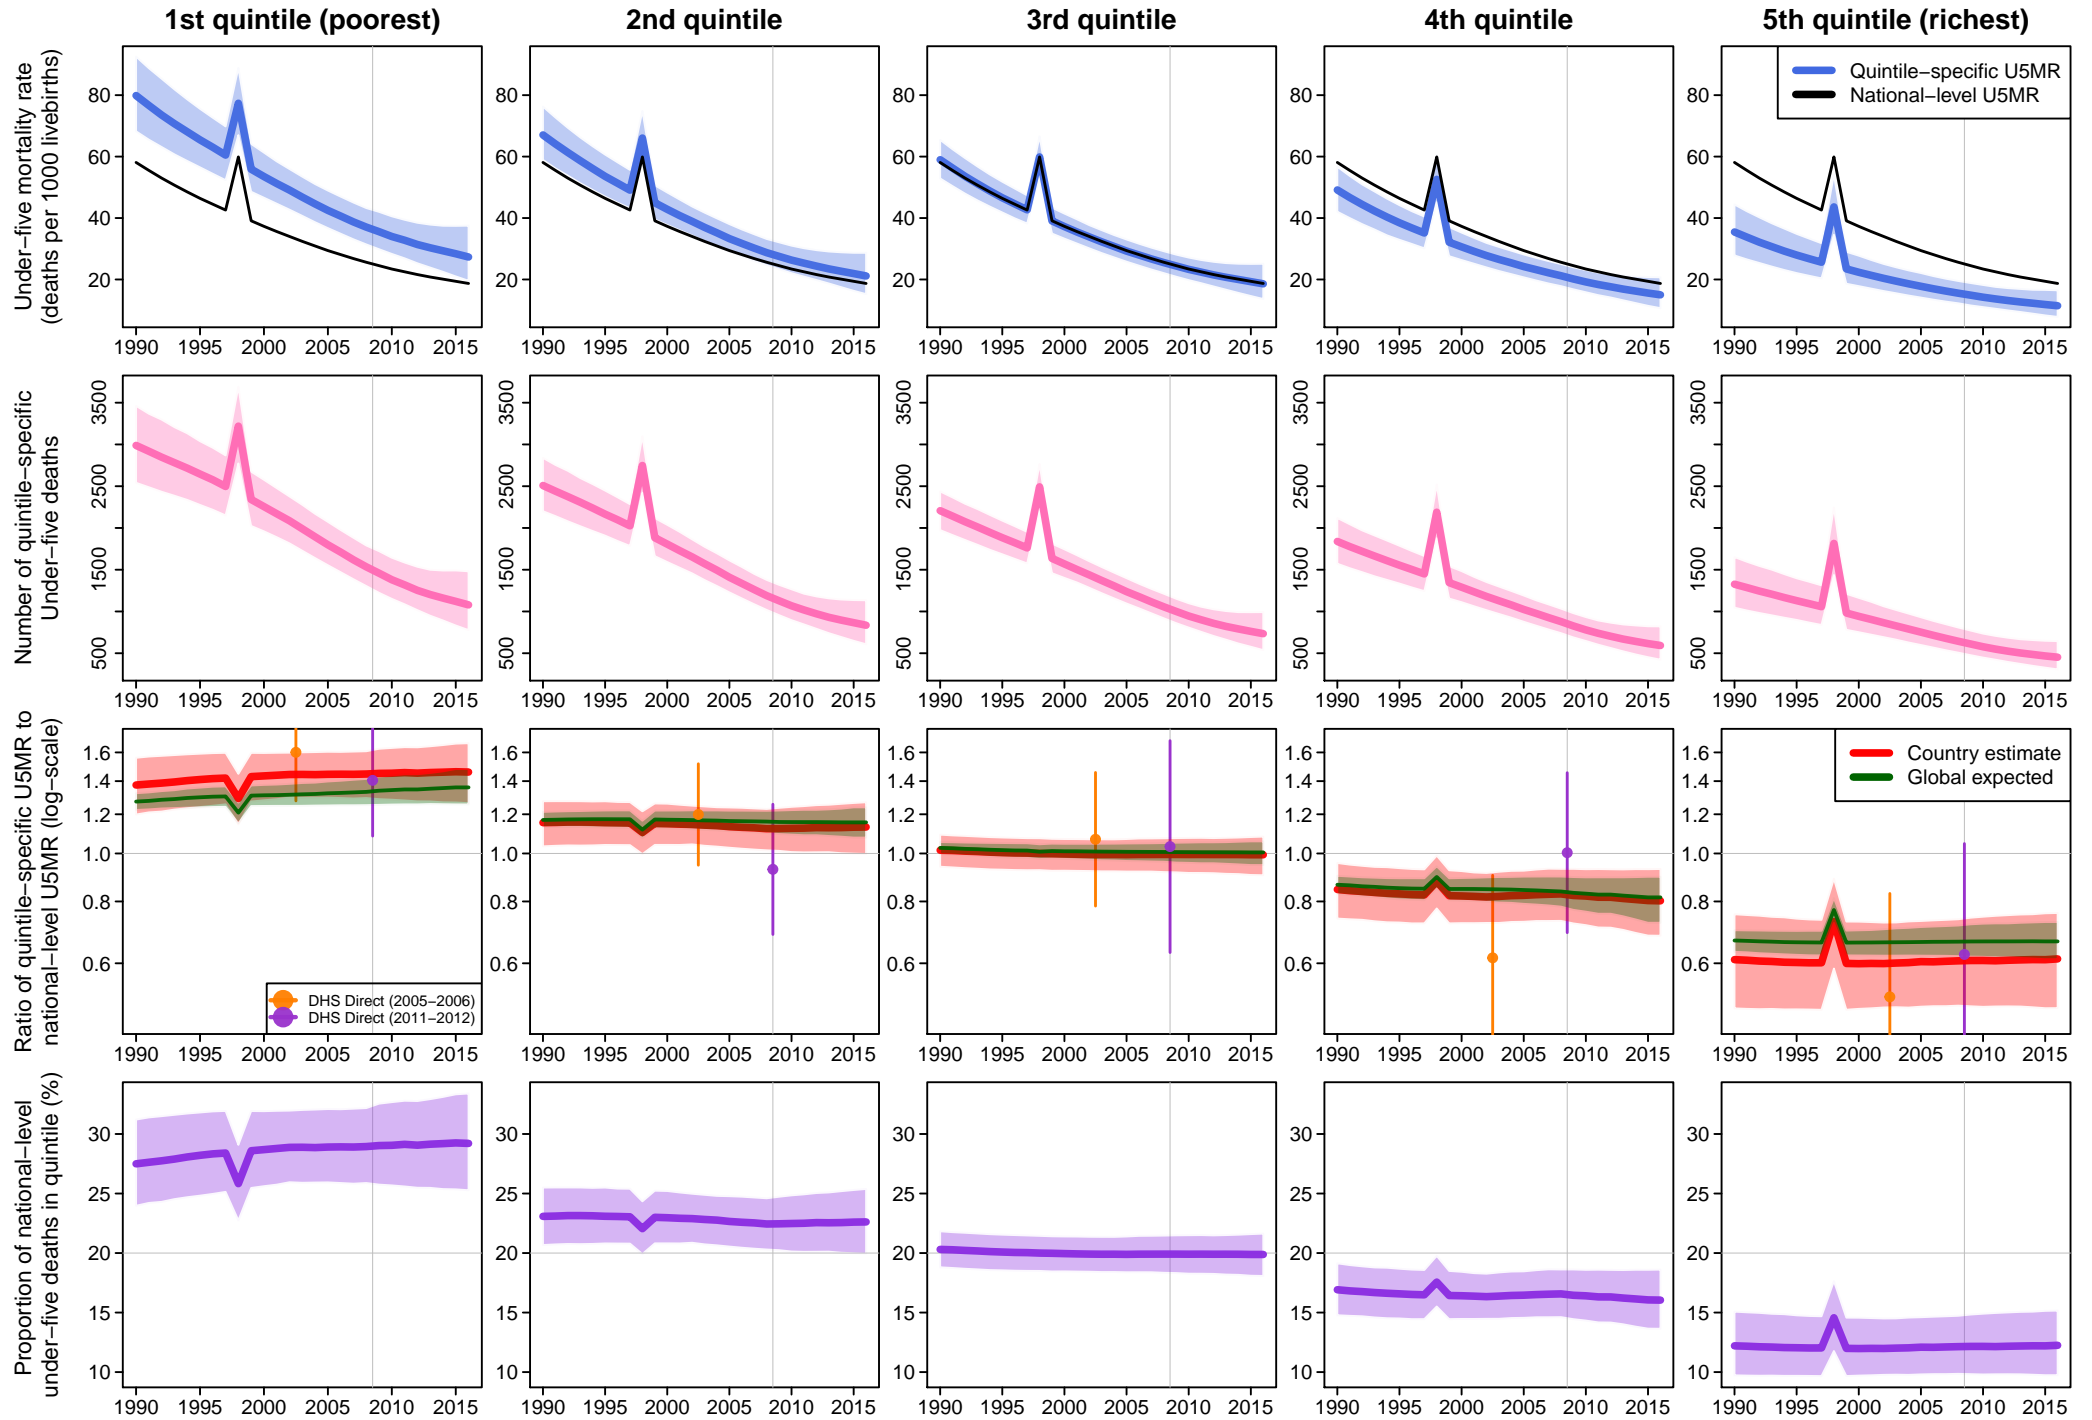

# India

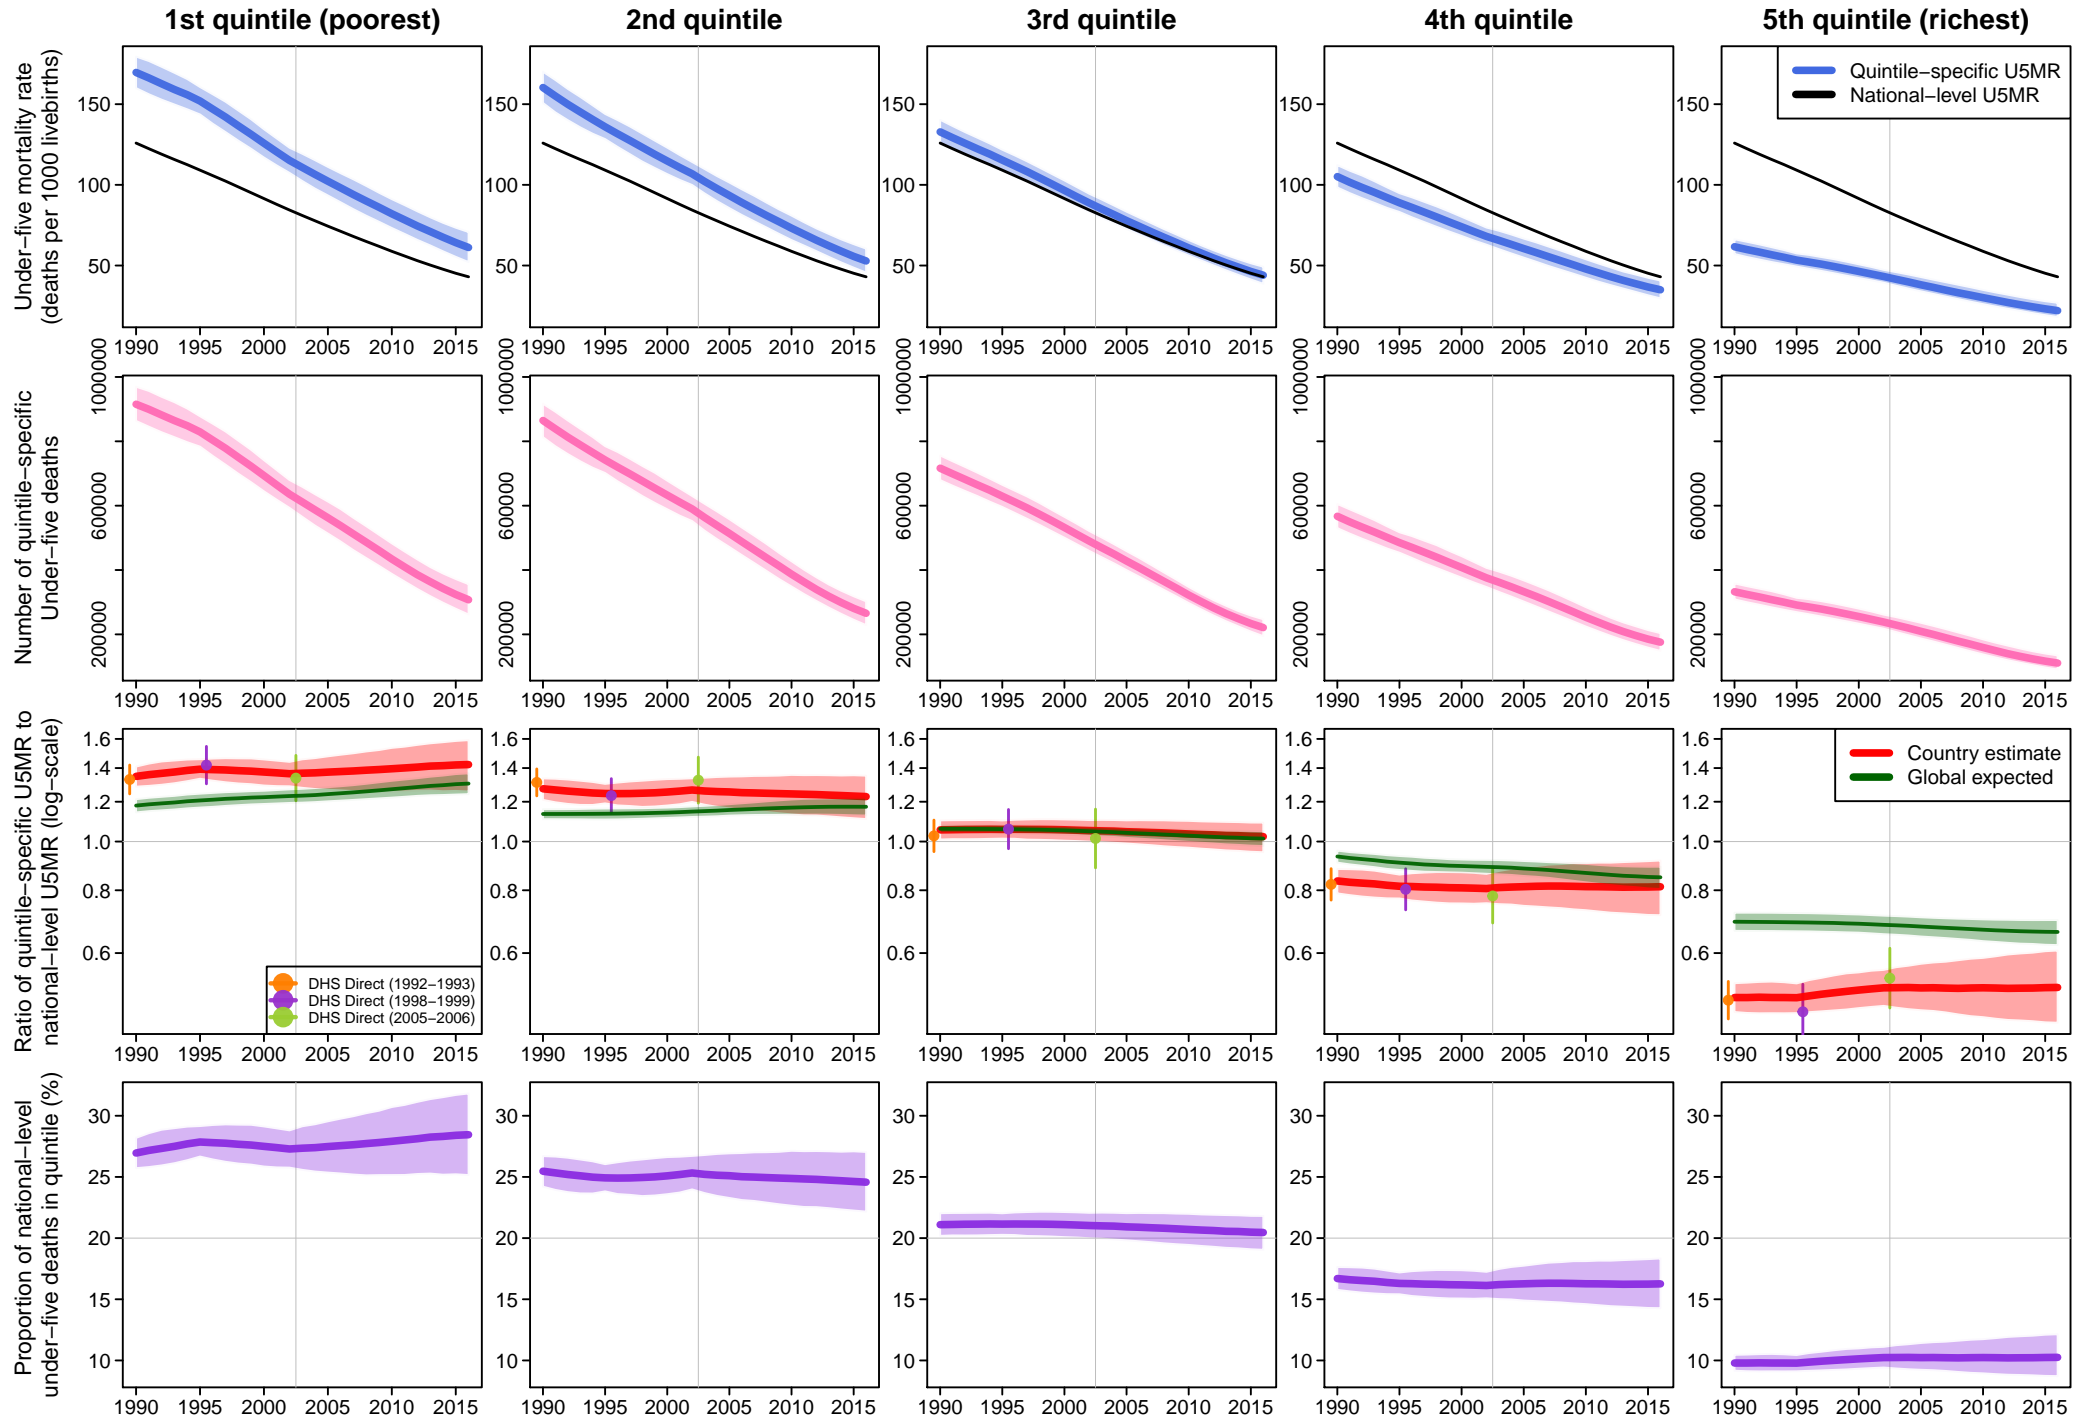

# Indonesia

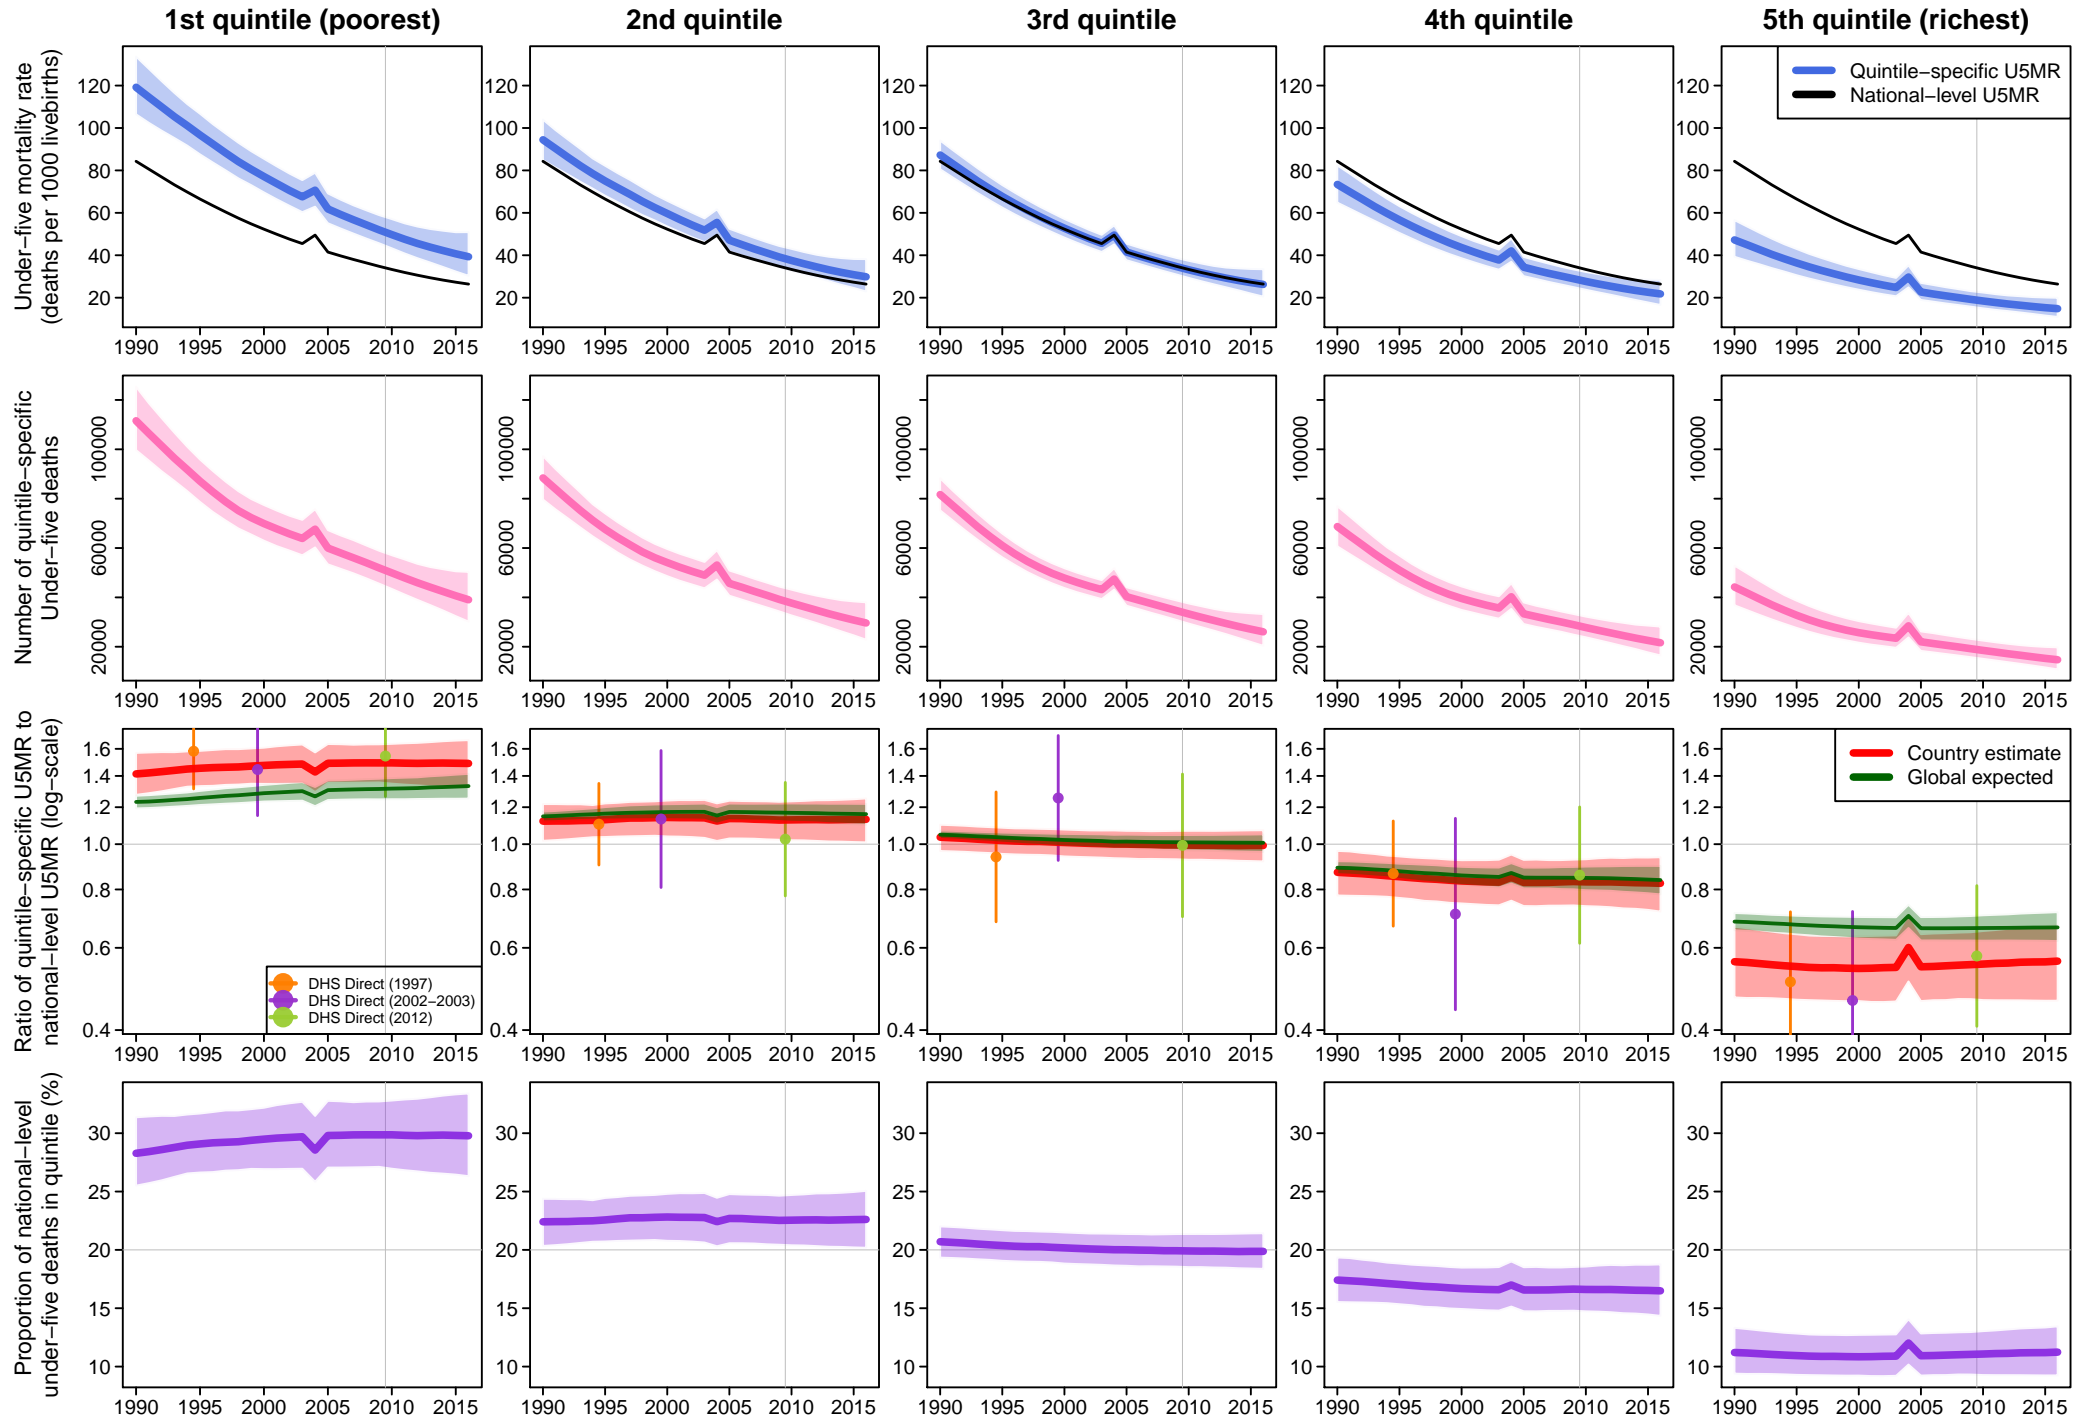

# Iraq

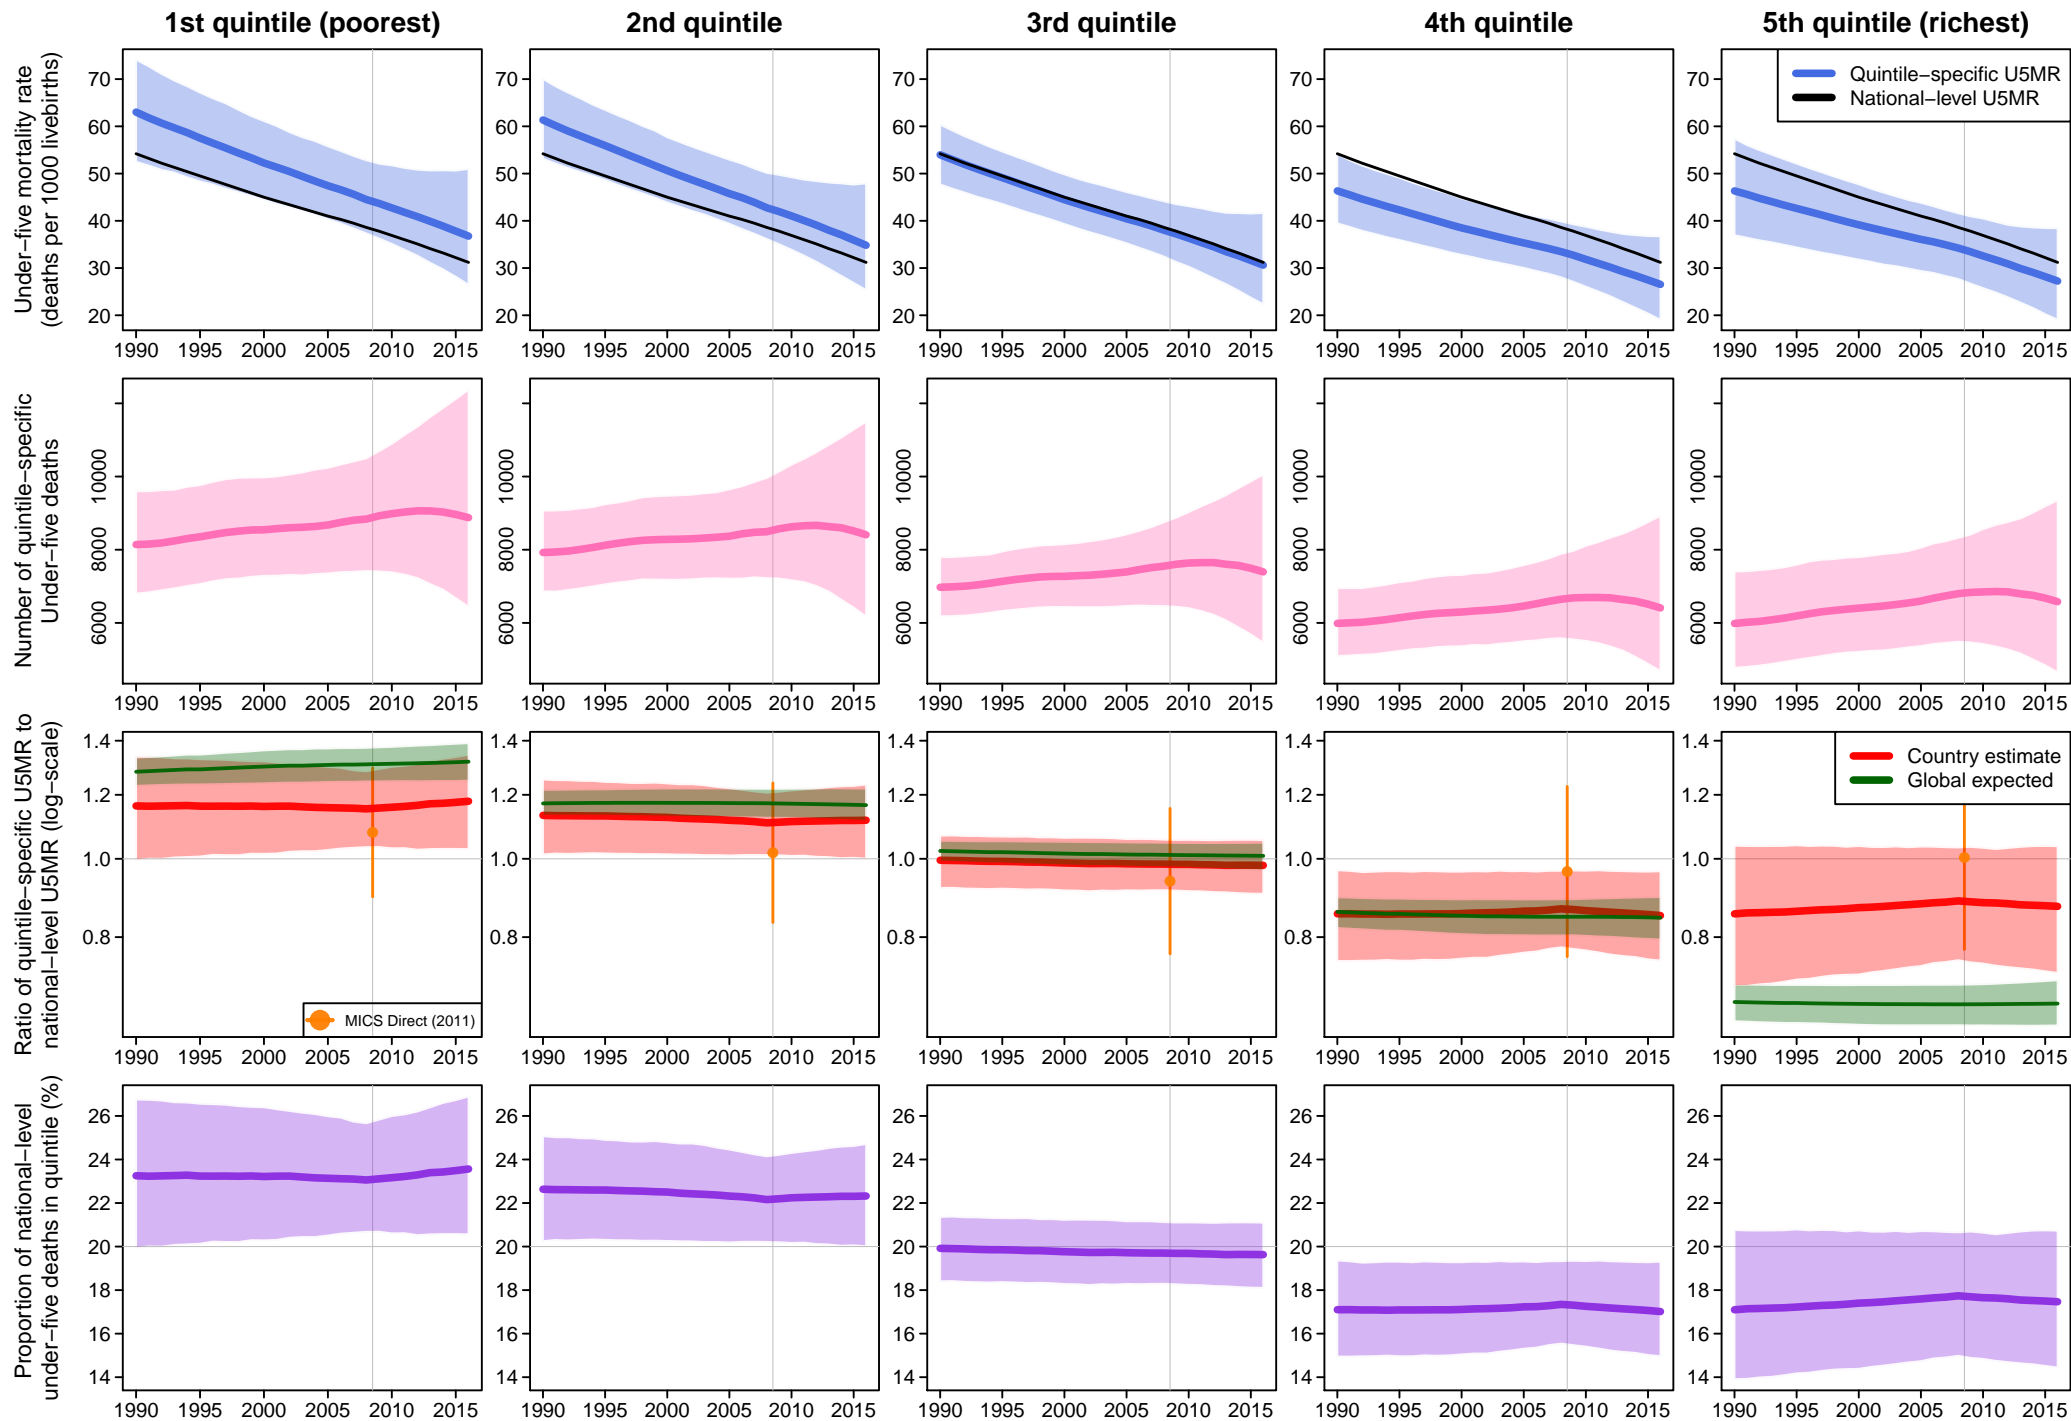

# Jordan

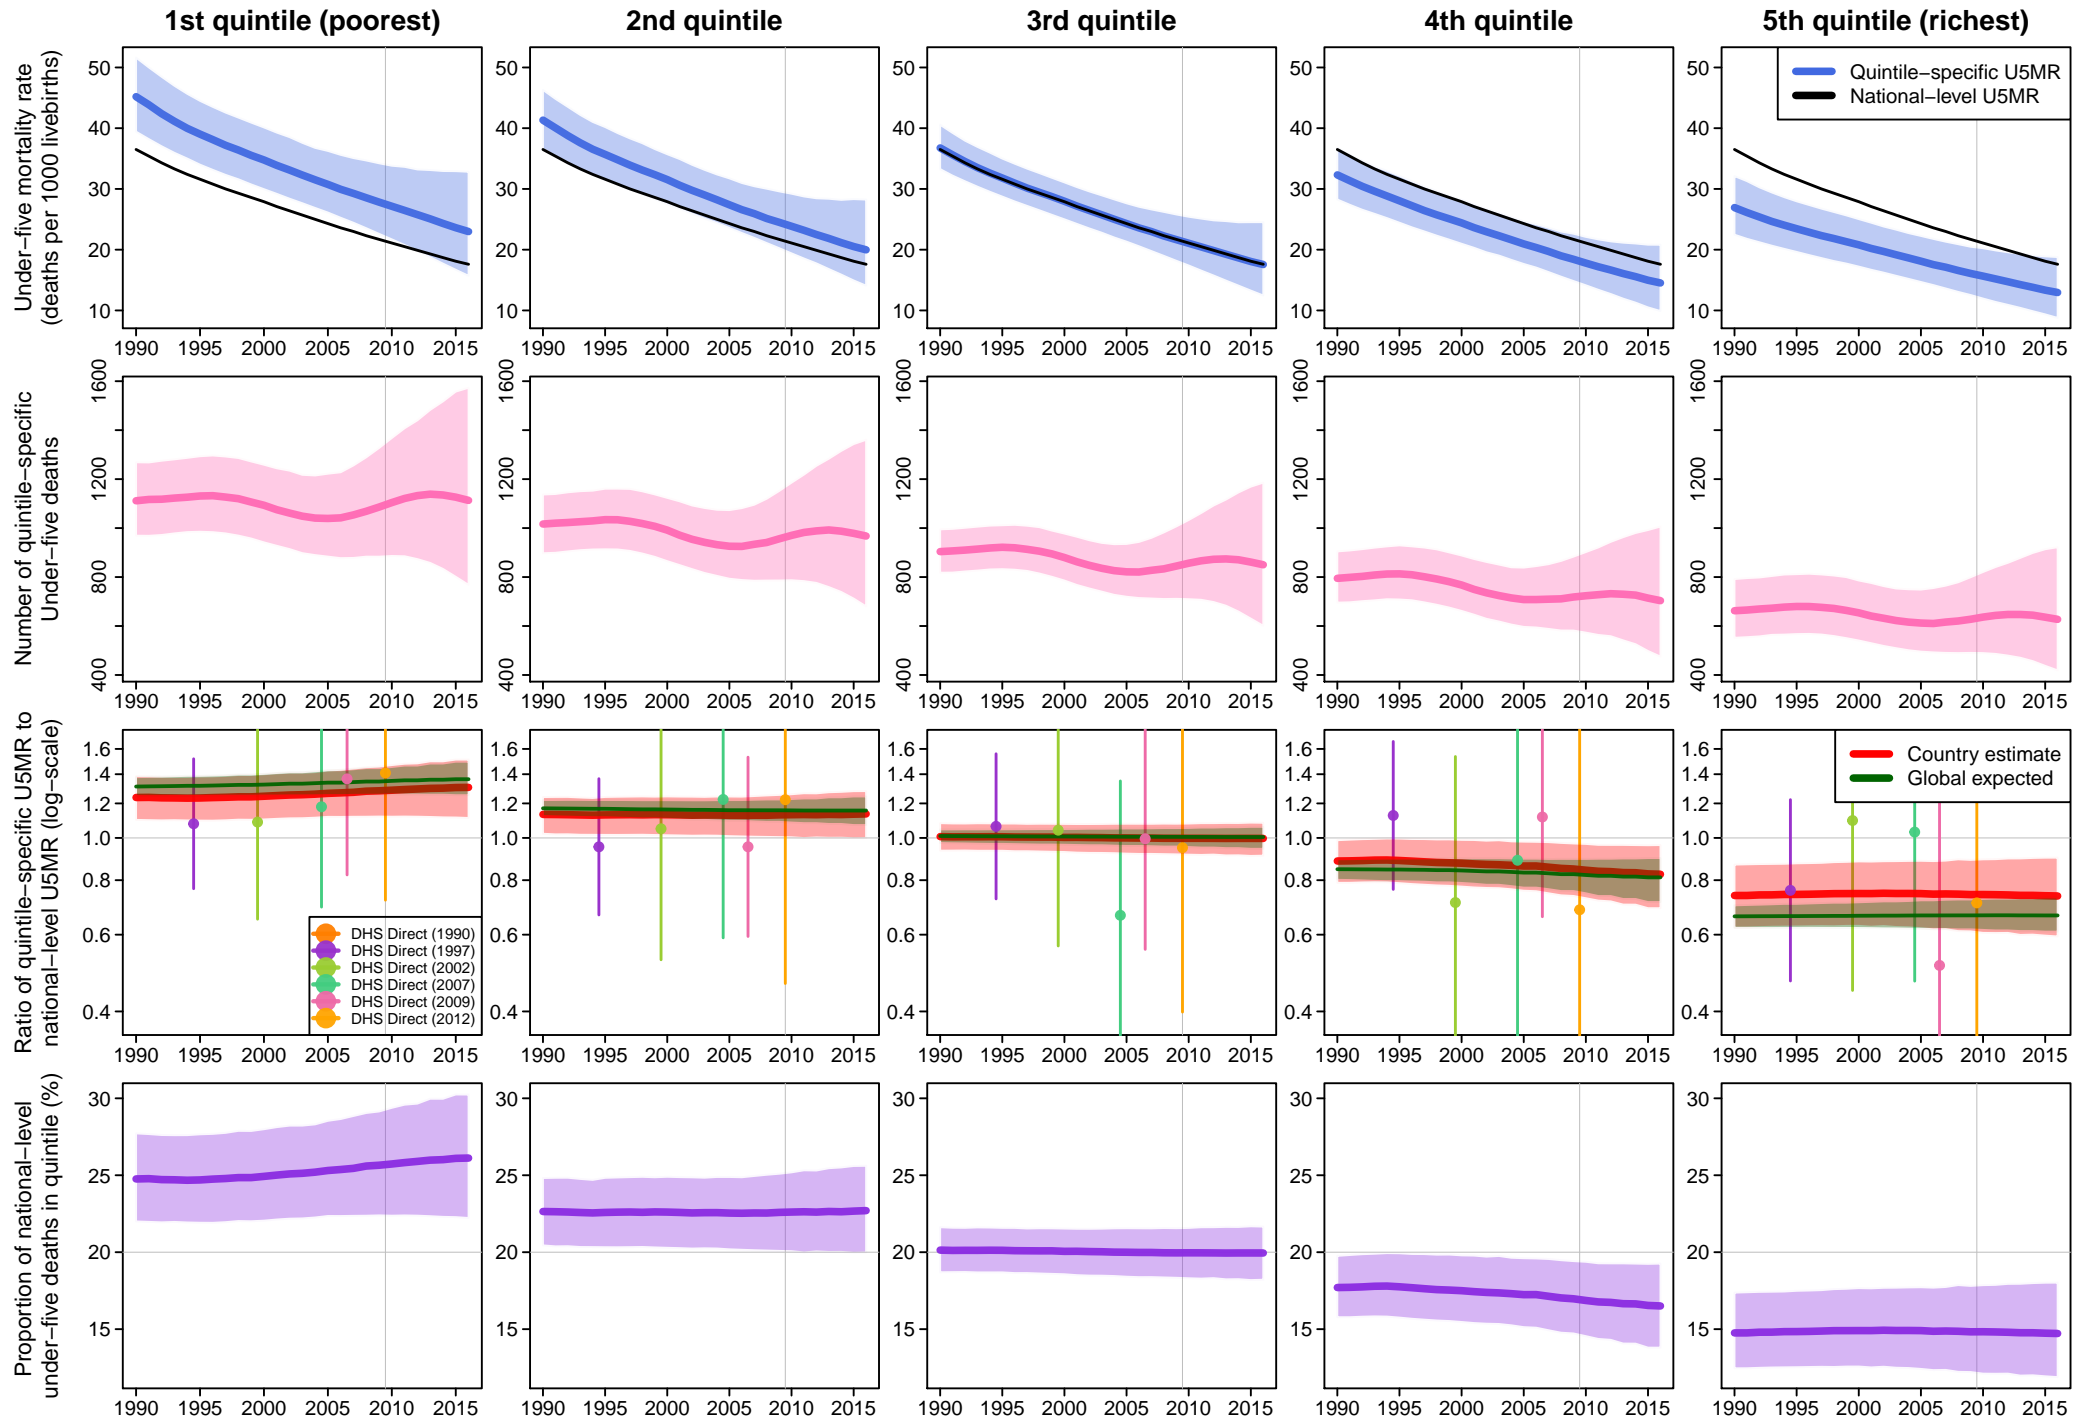



# Kazakhstan

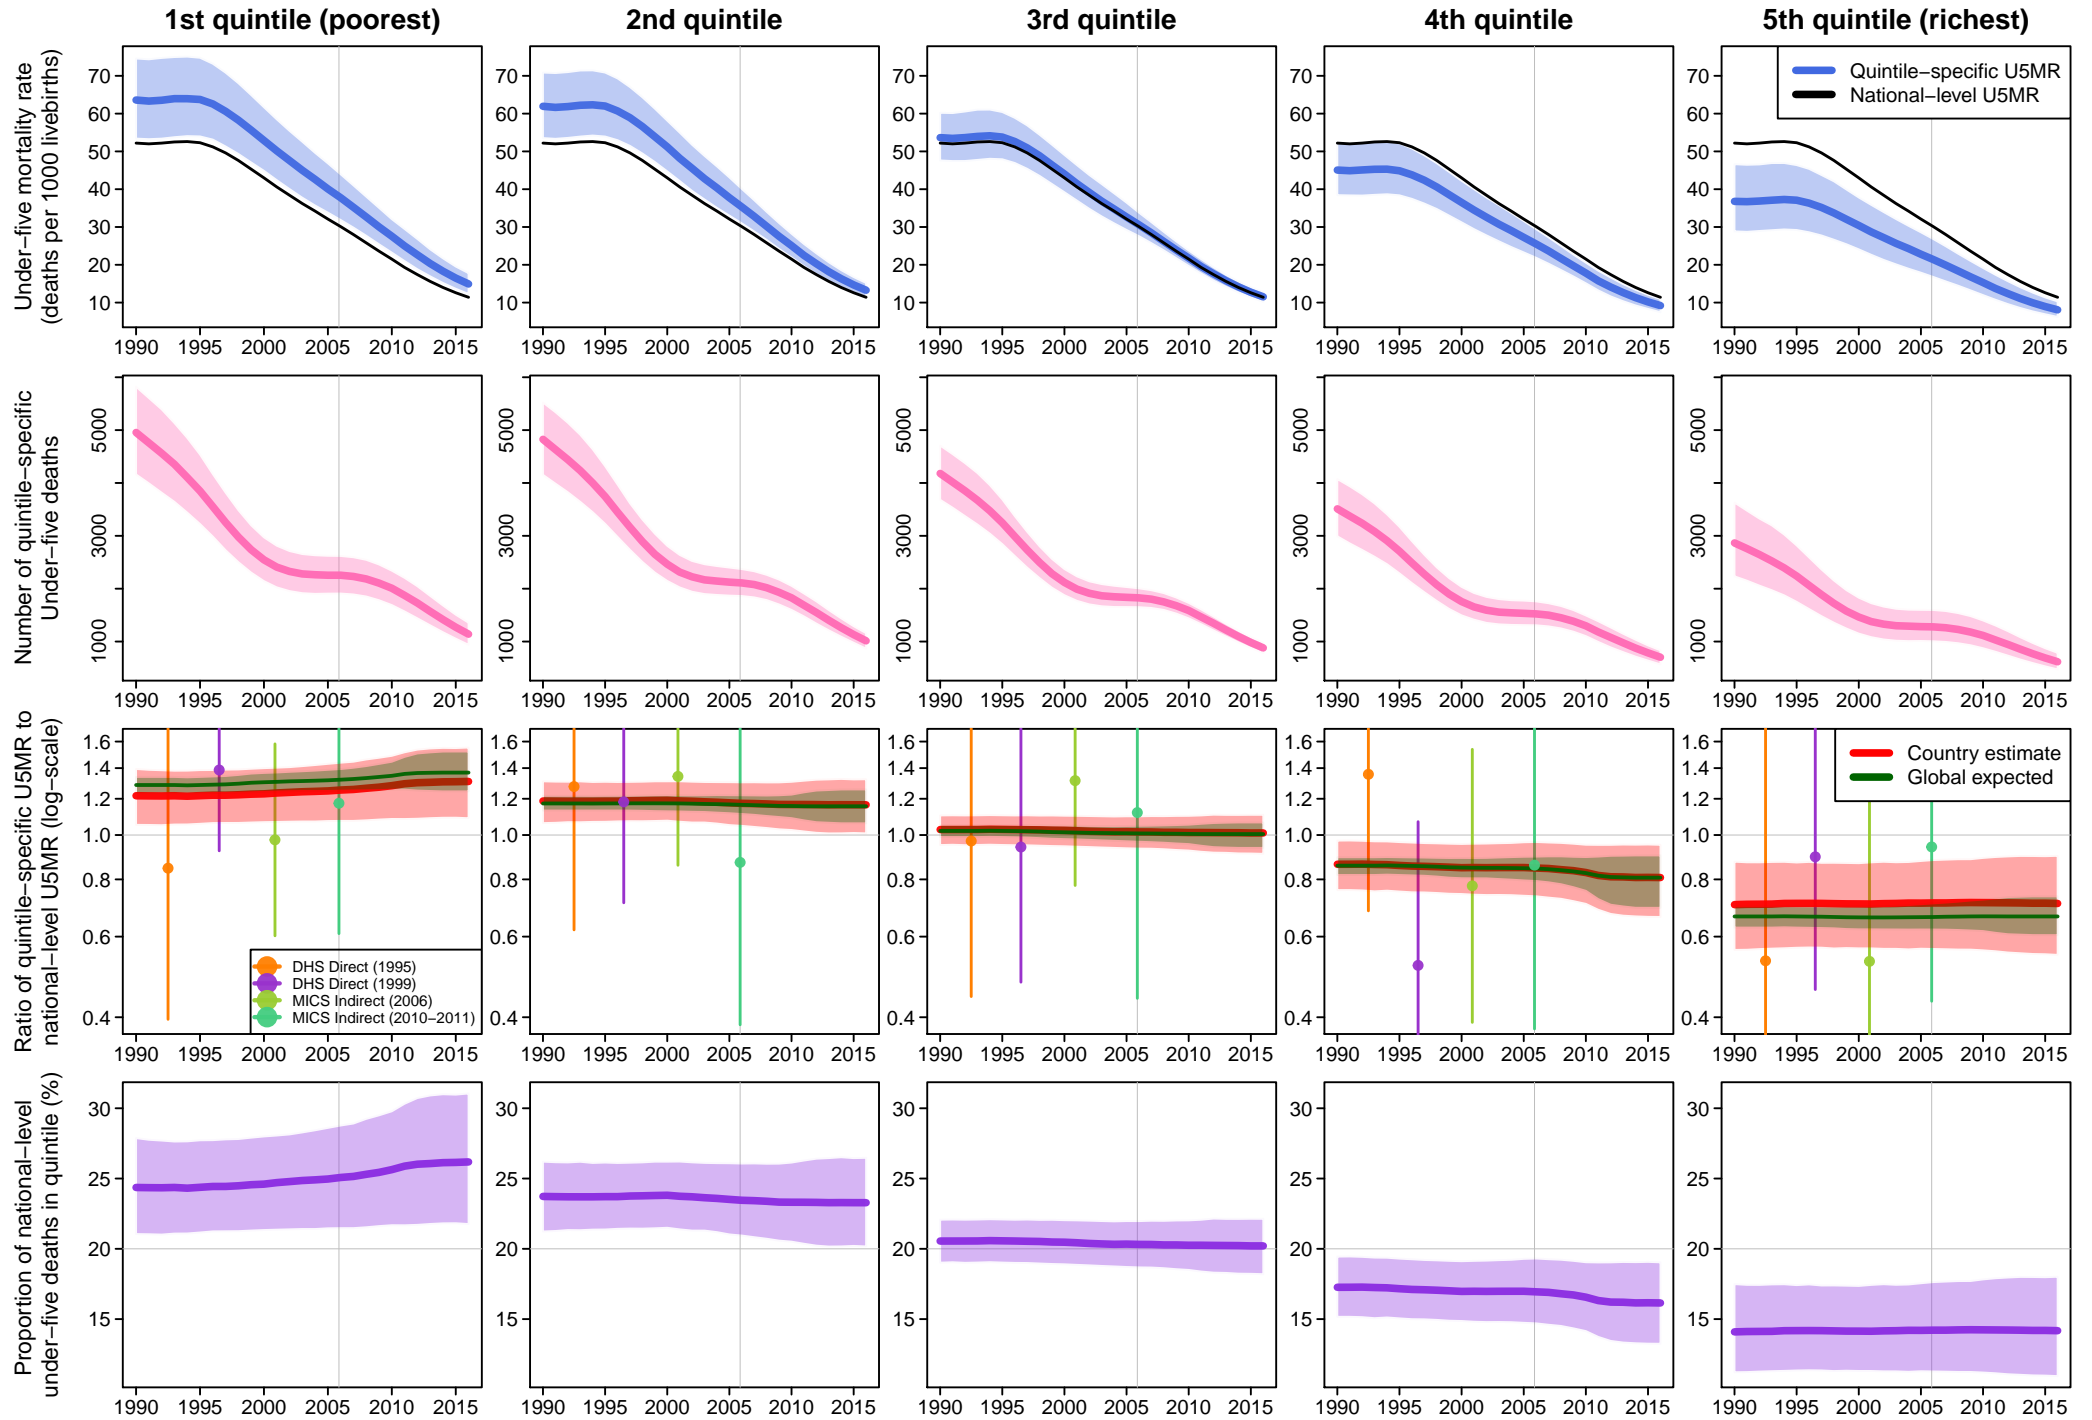

# Kenya

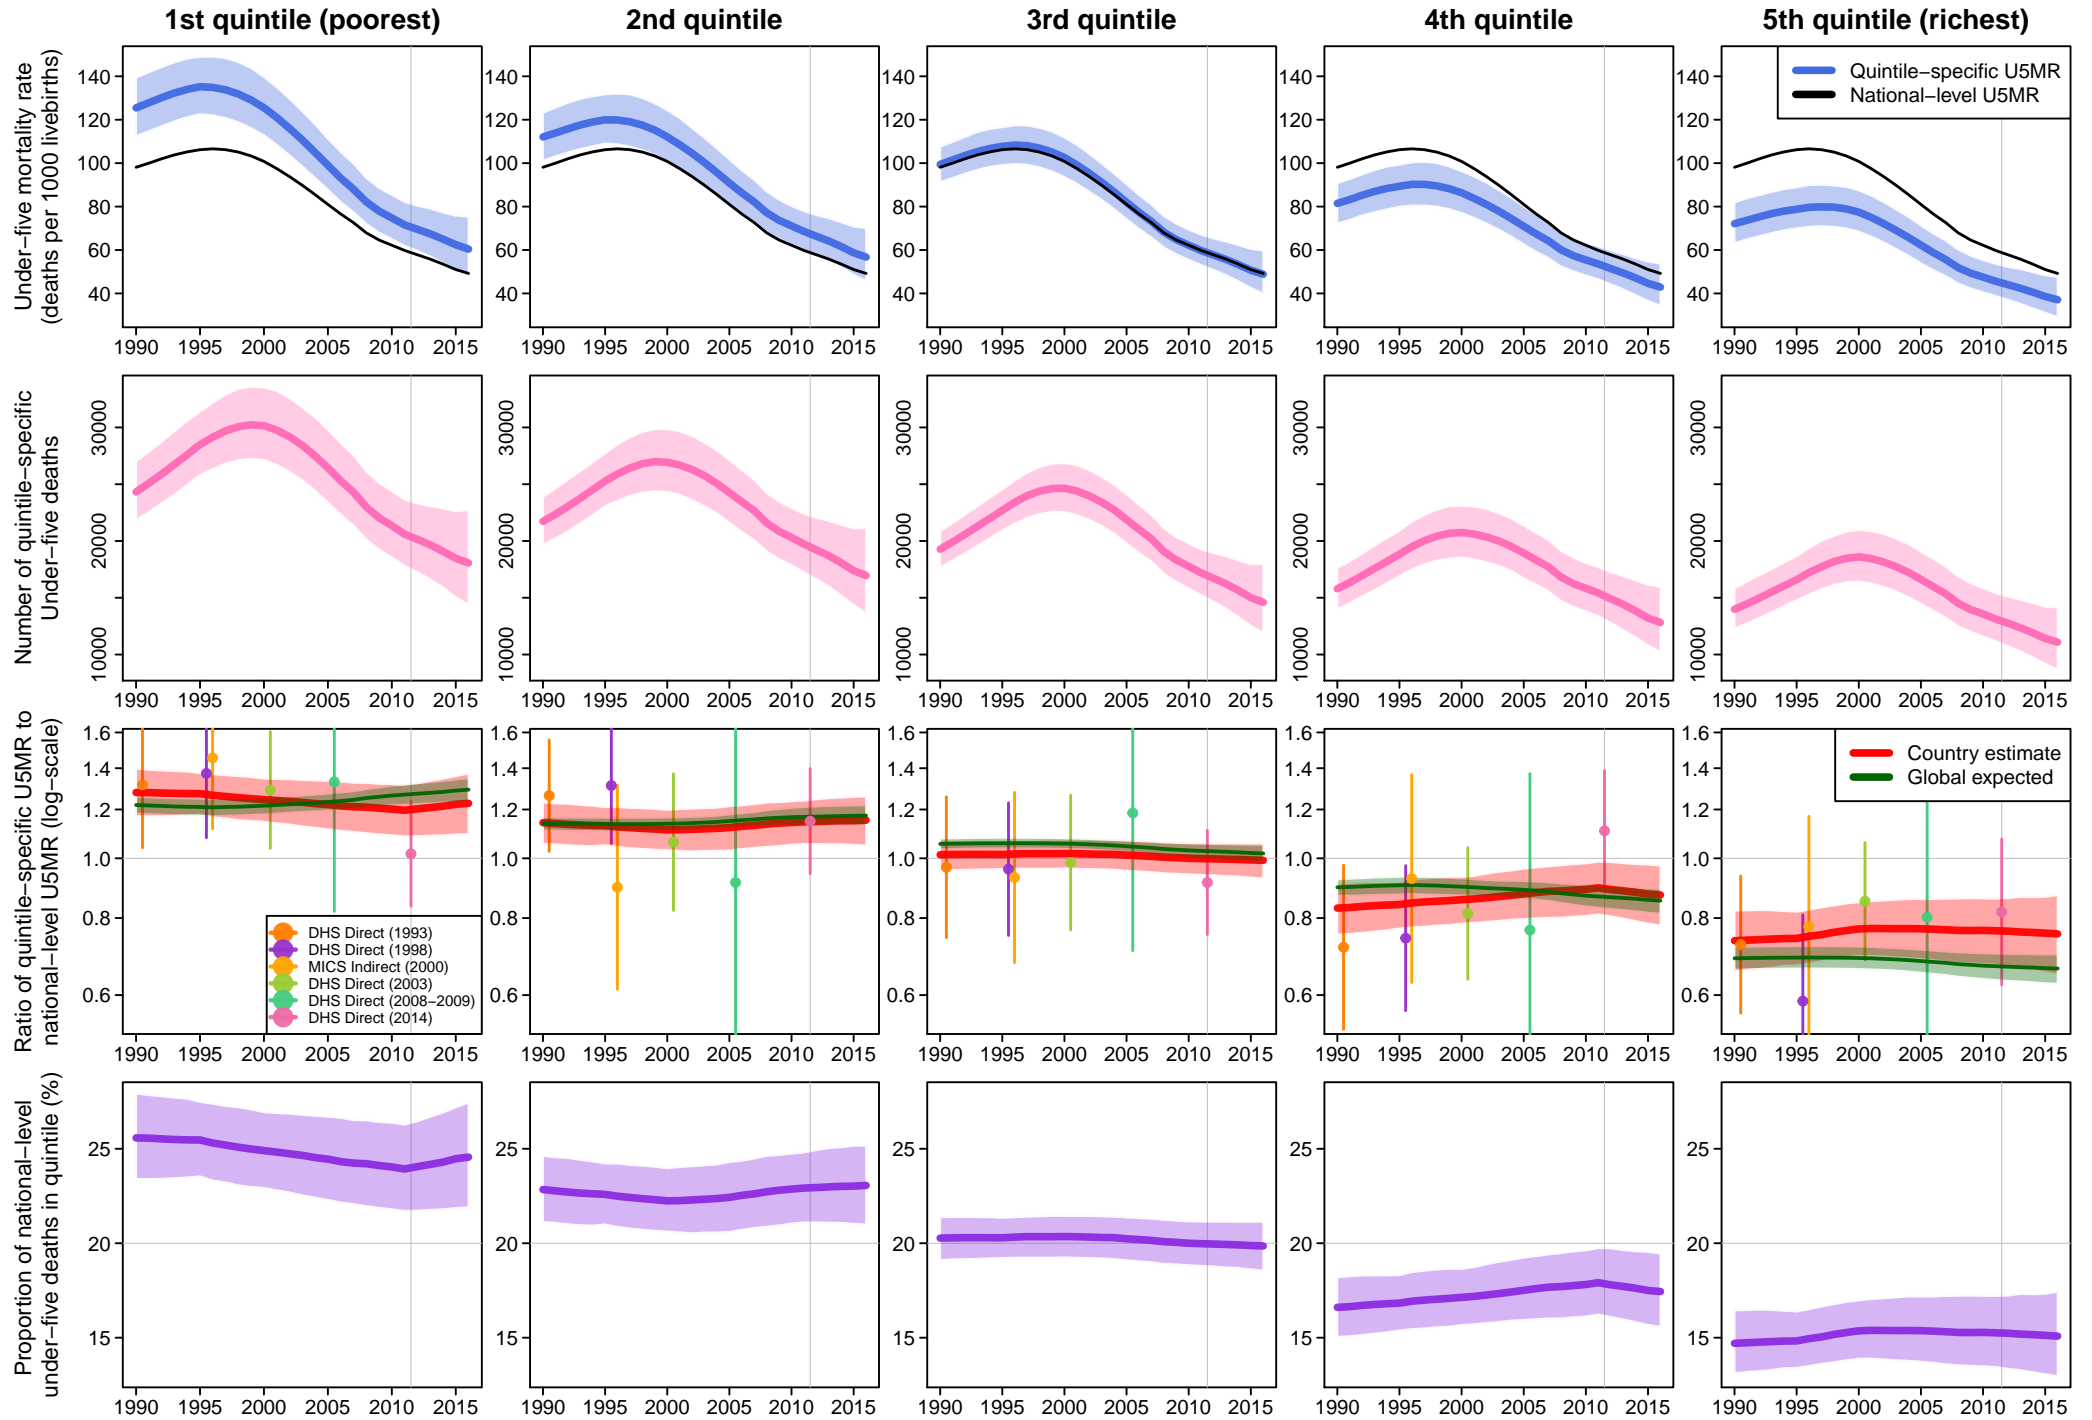

# Kyrgyzstan

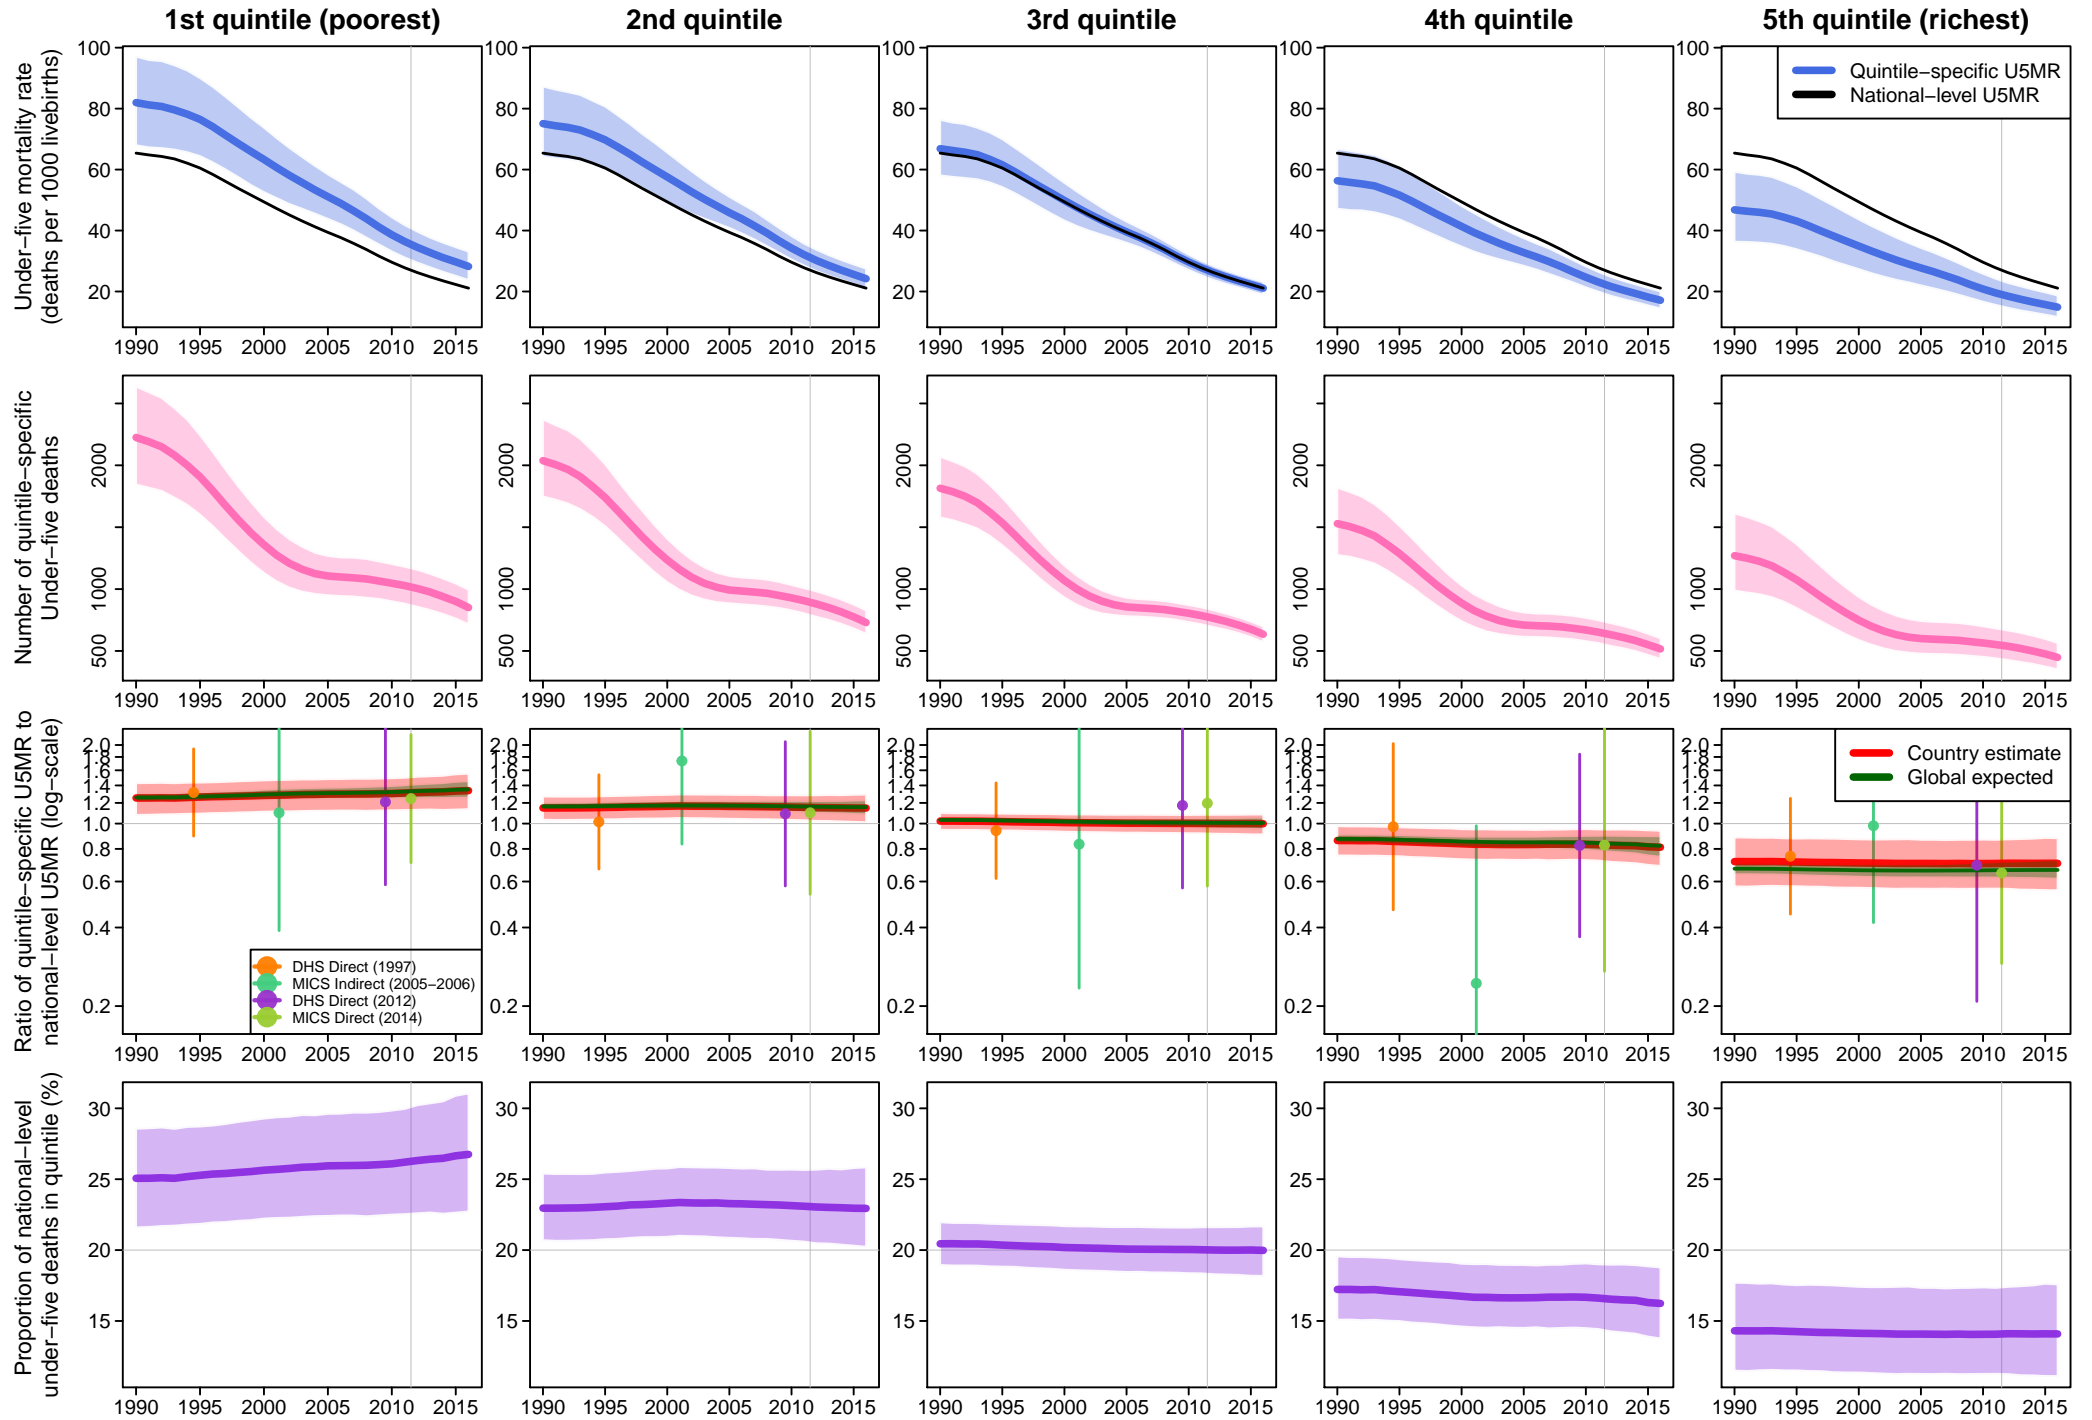

# Lao People's Democratic Republic

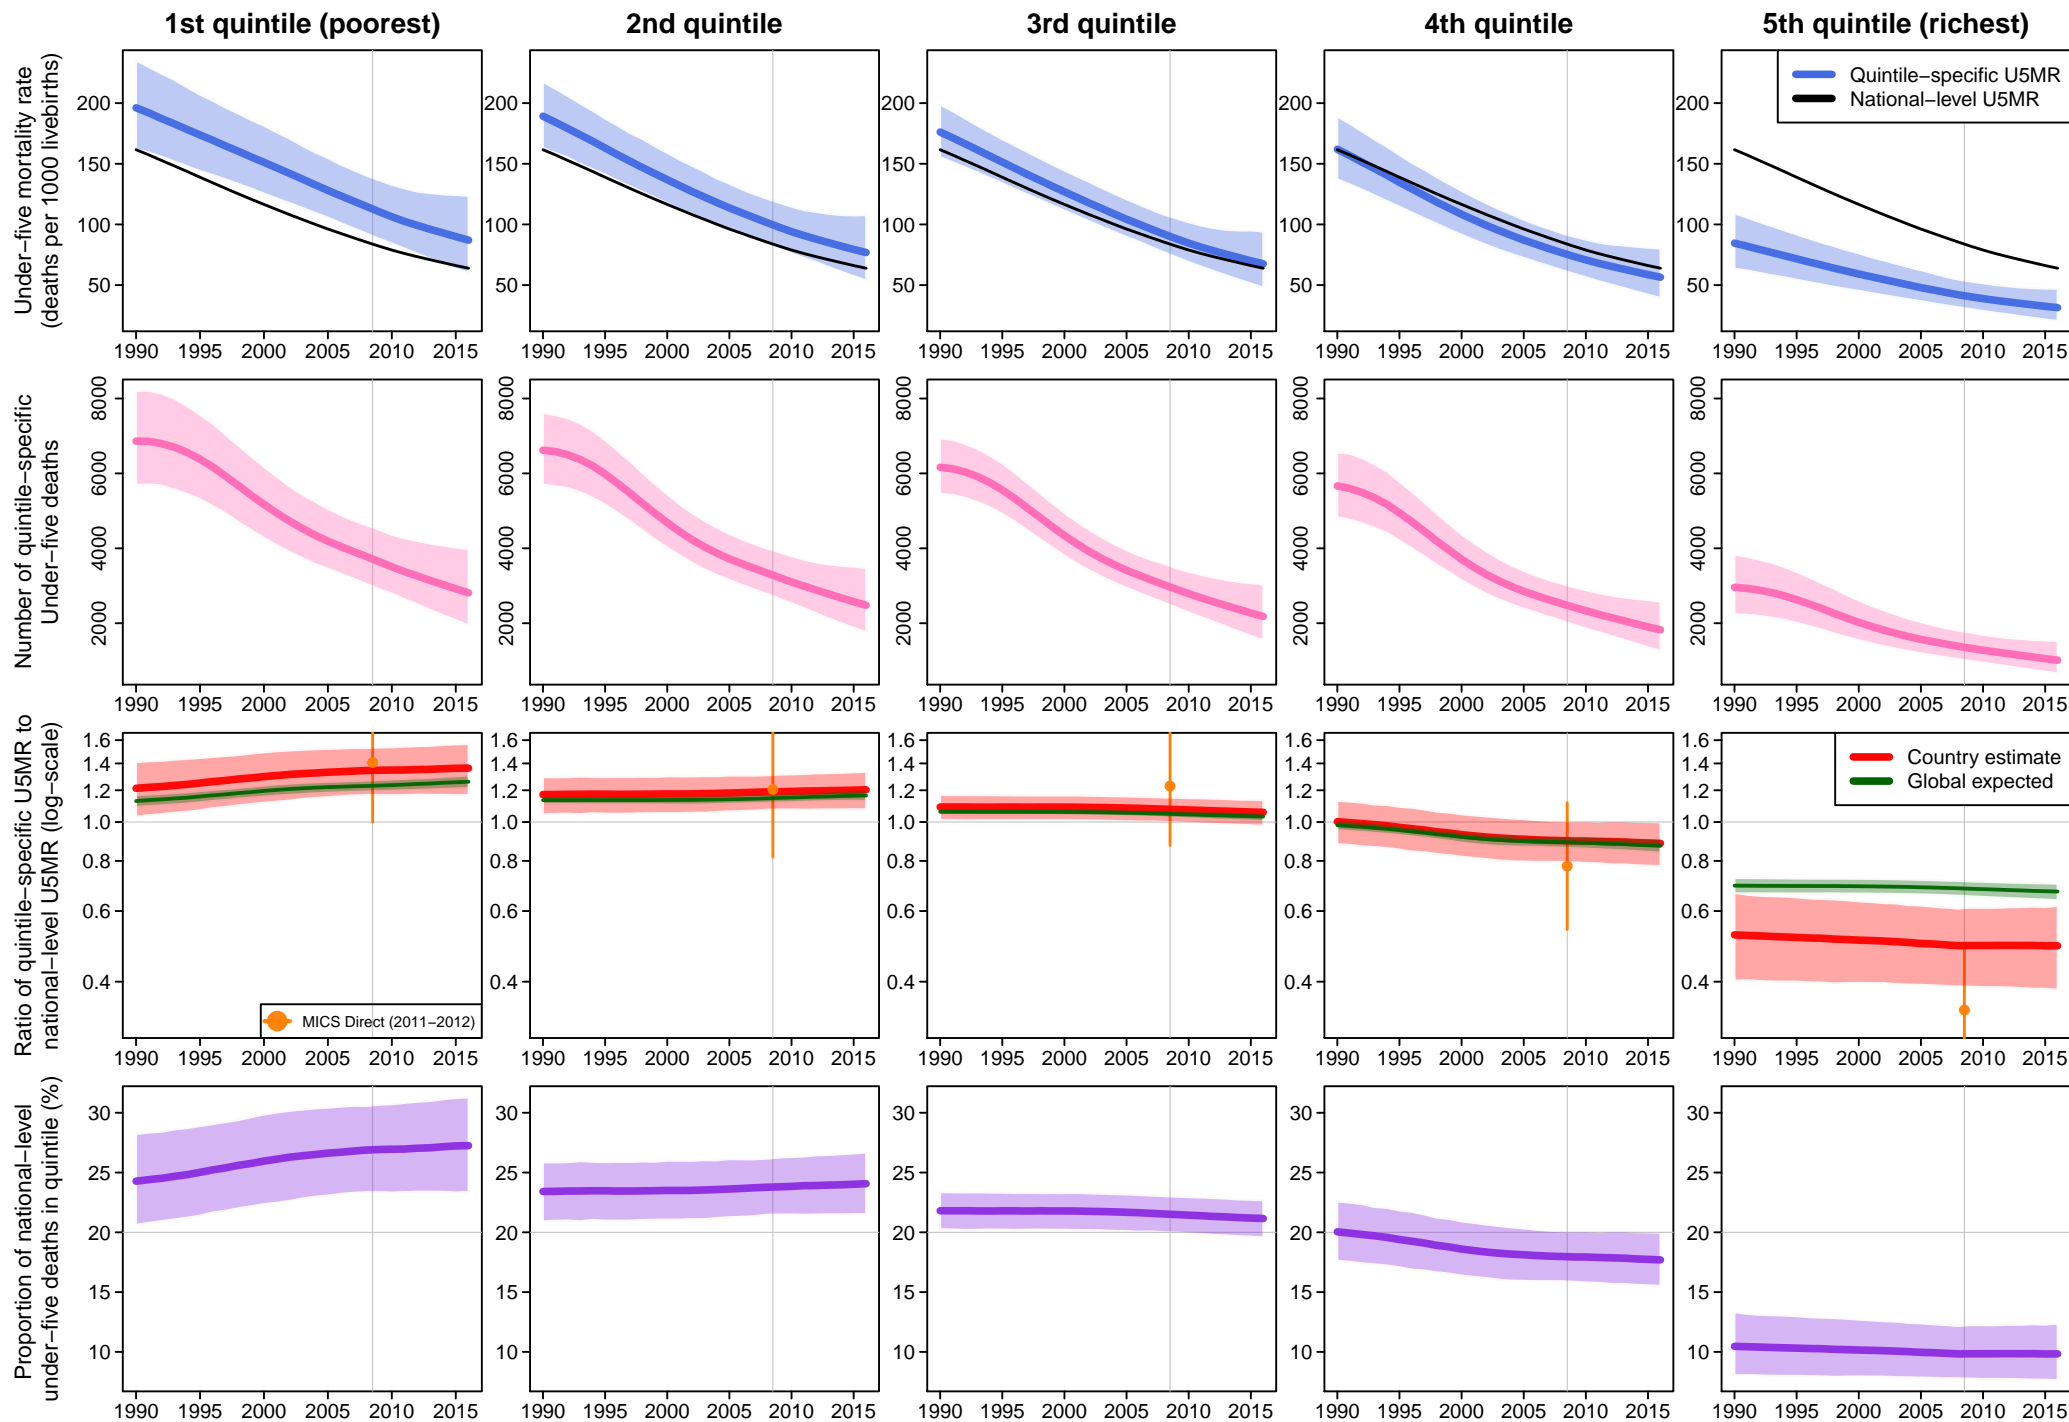

# Lesotho

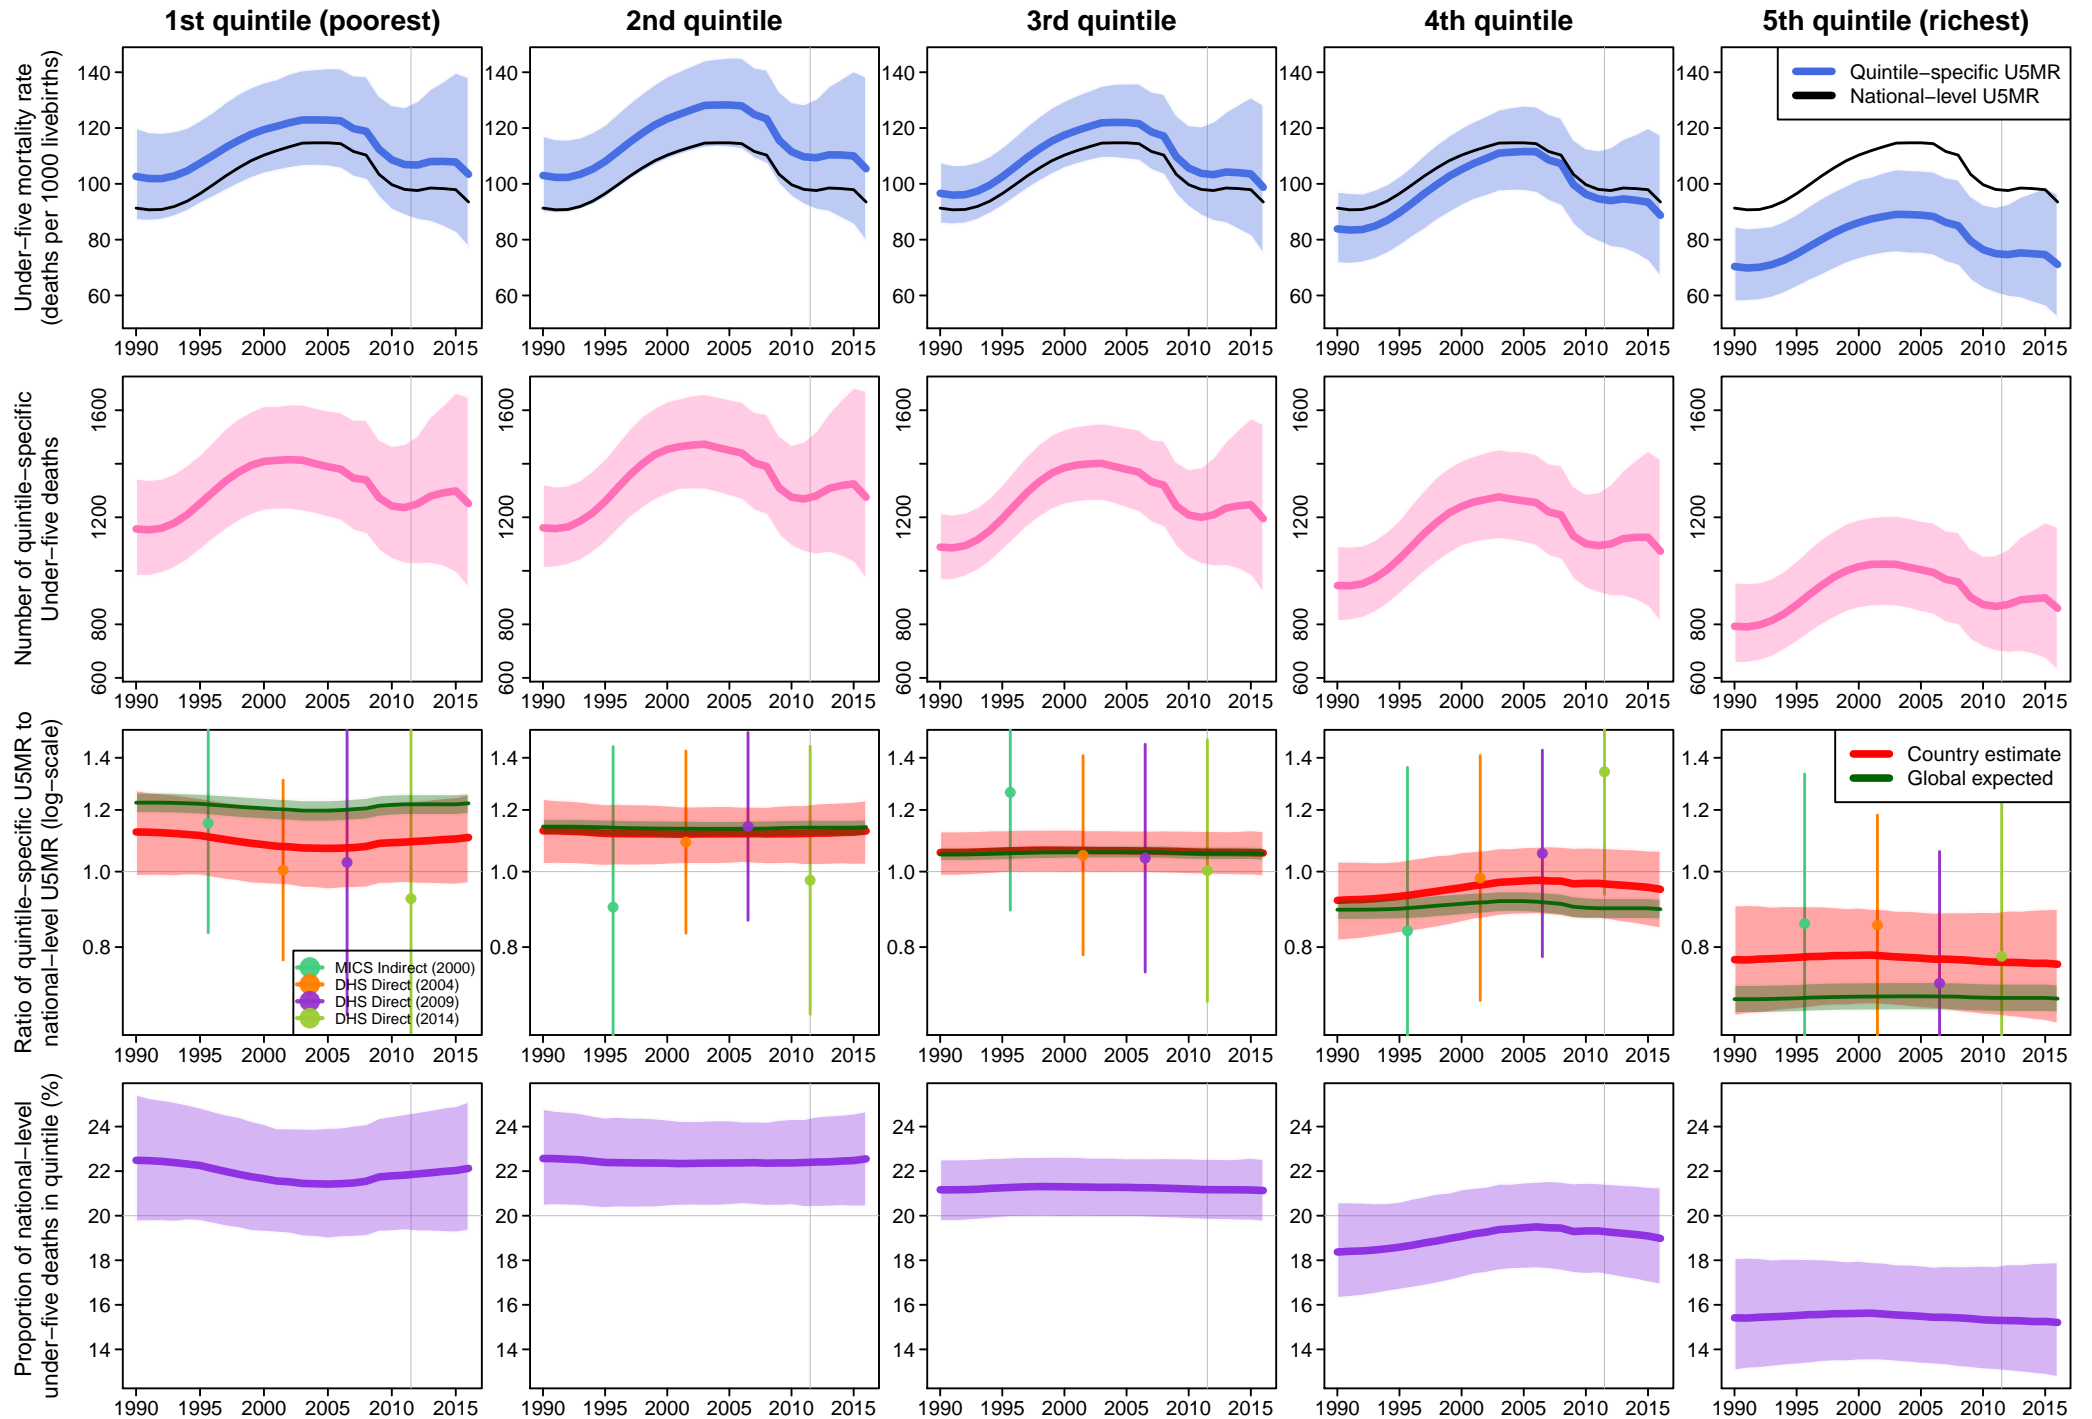

# Liberia

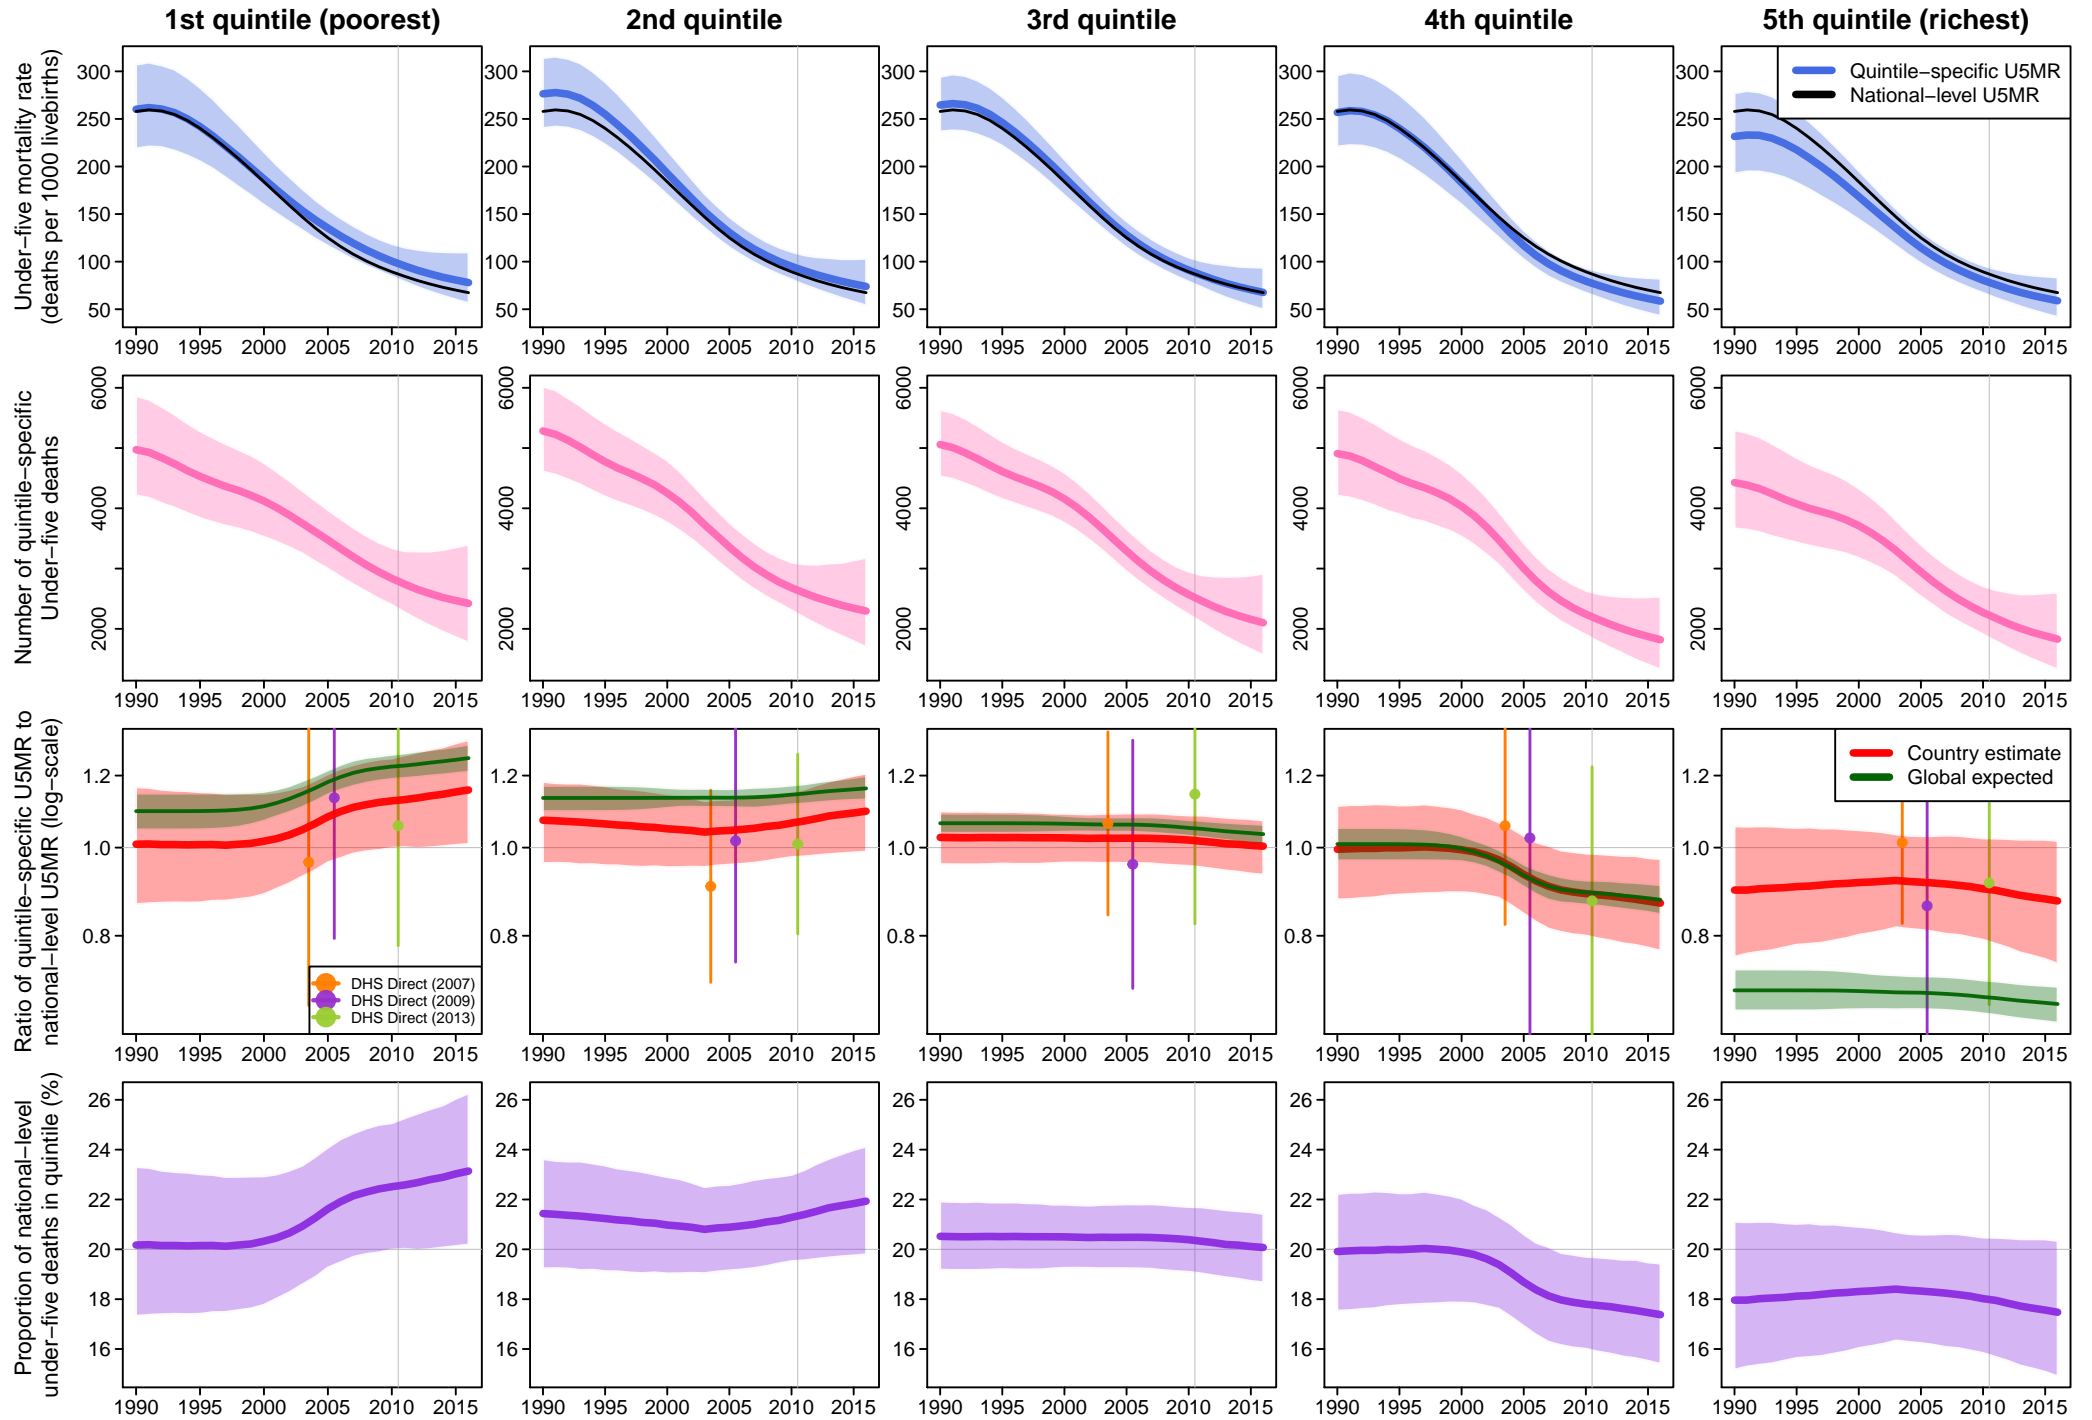

# Madagascar

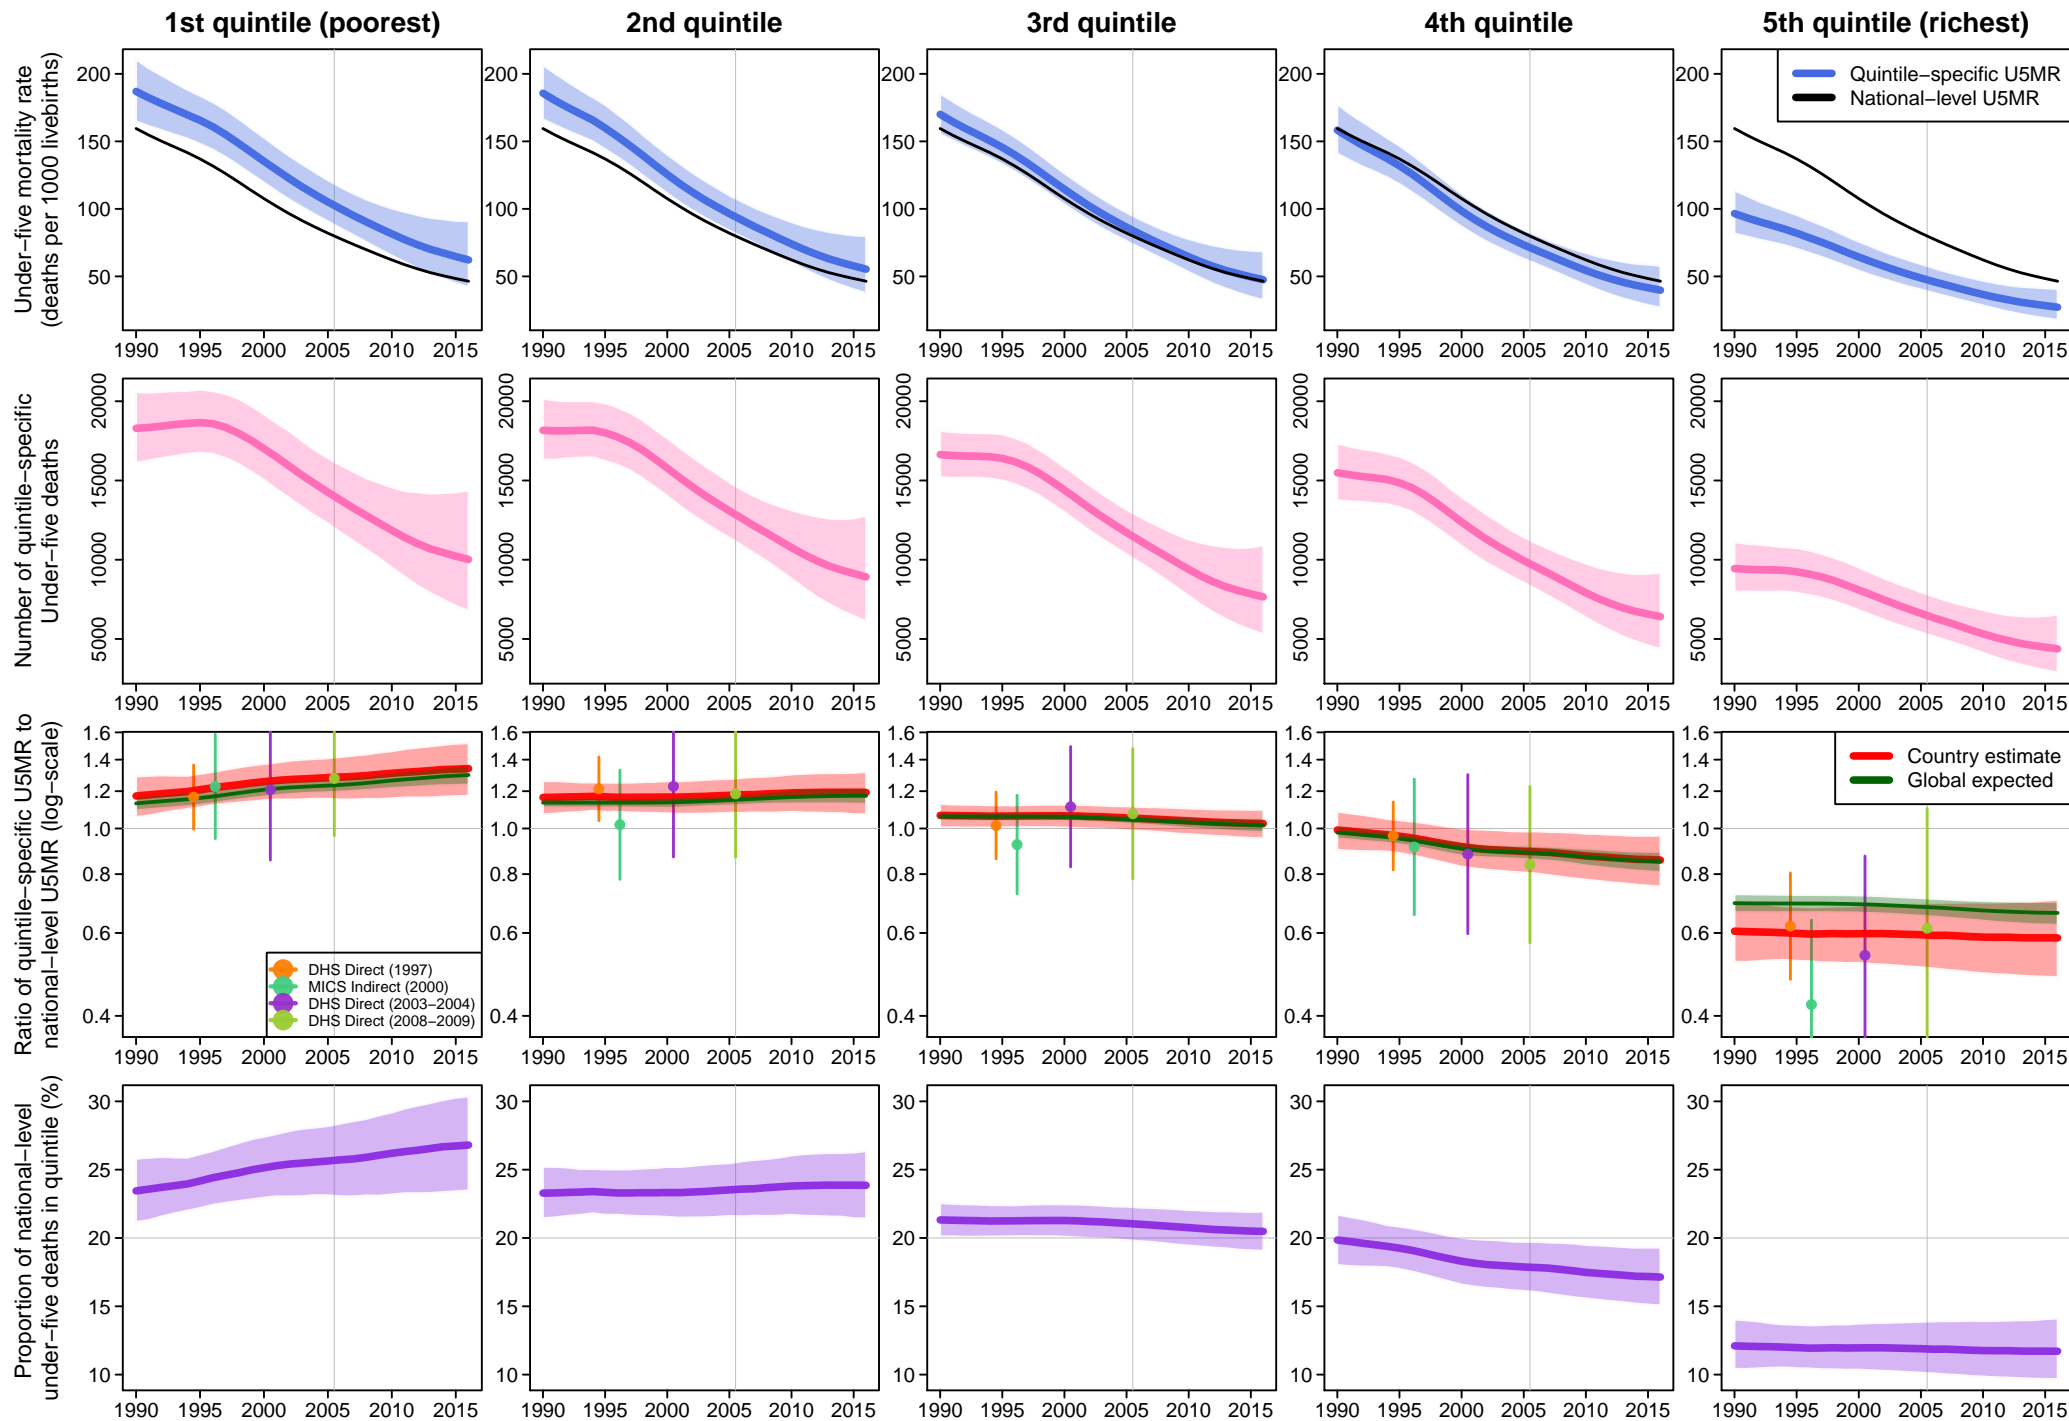

# Malawi

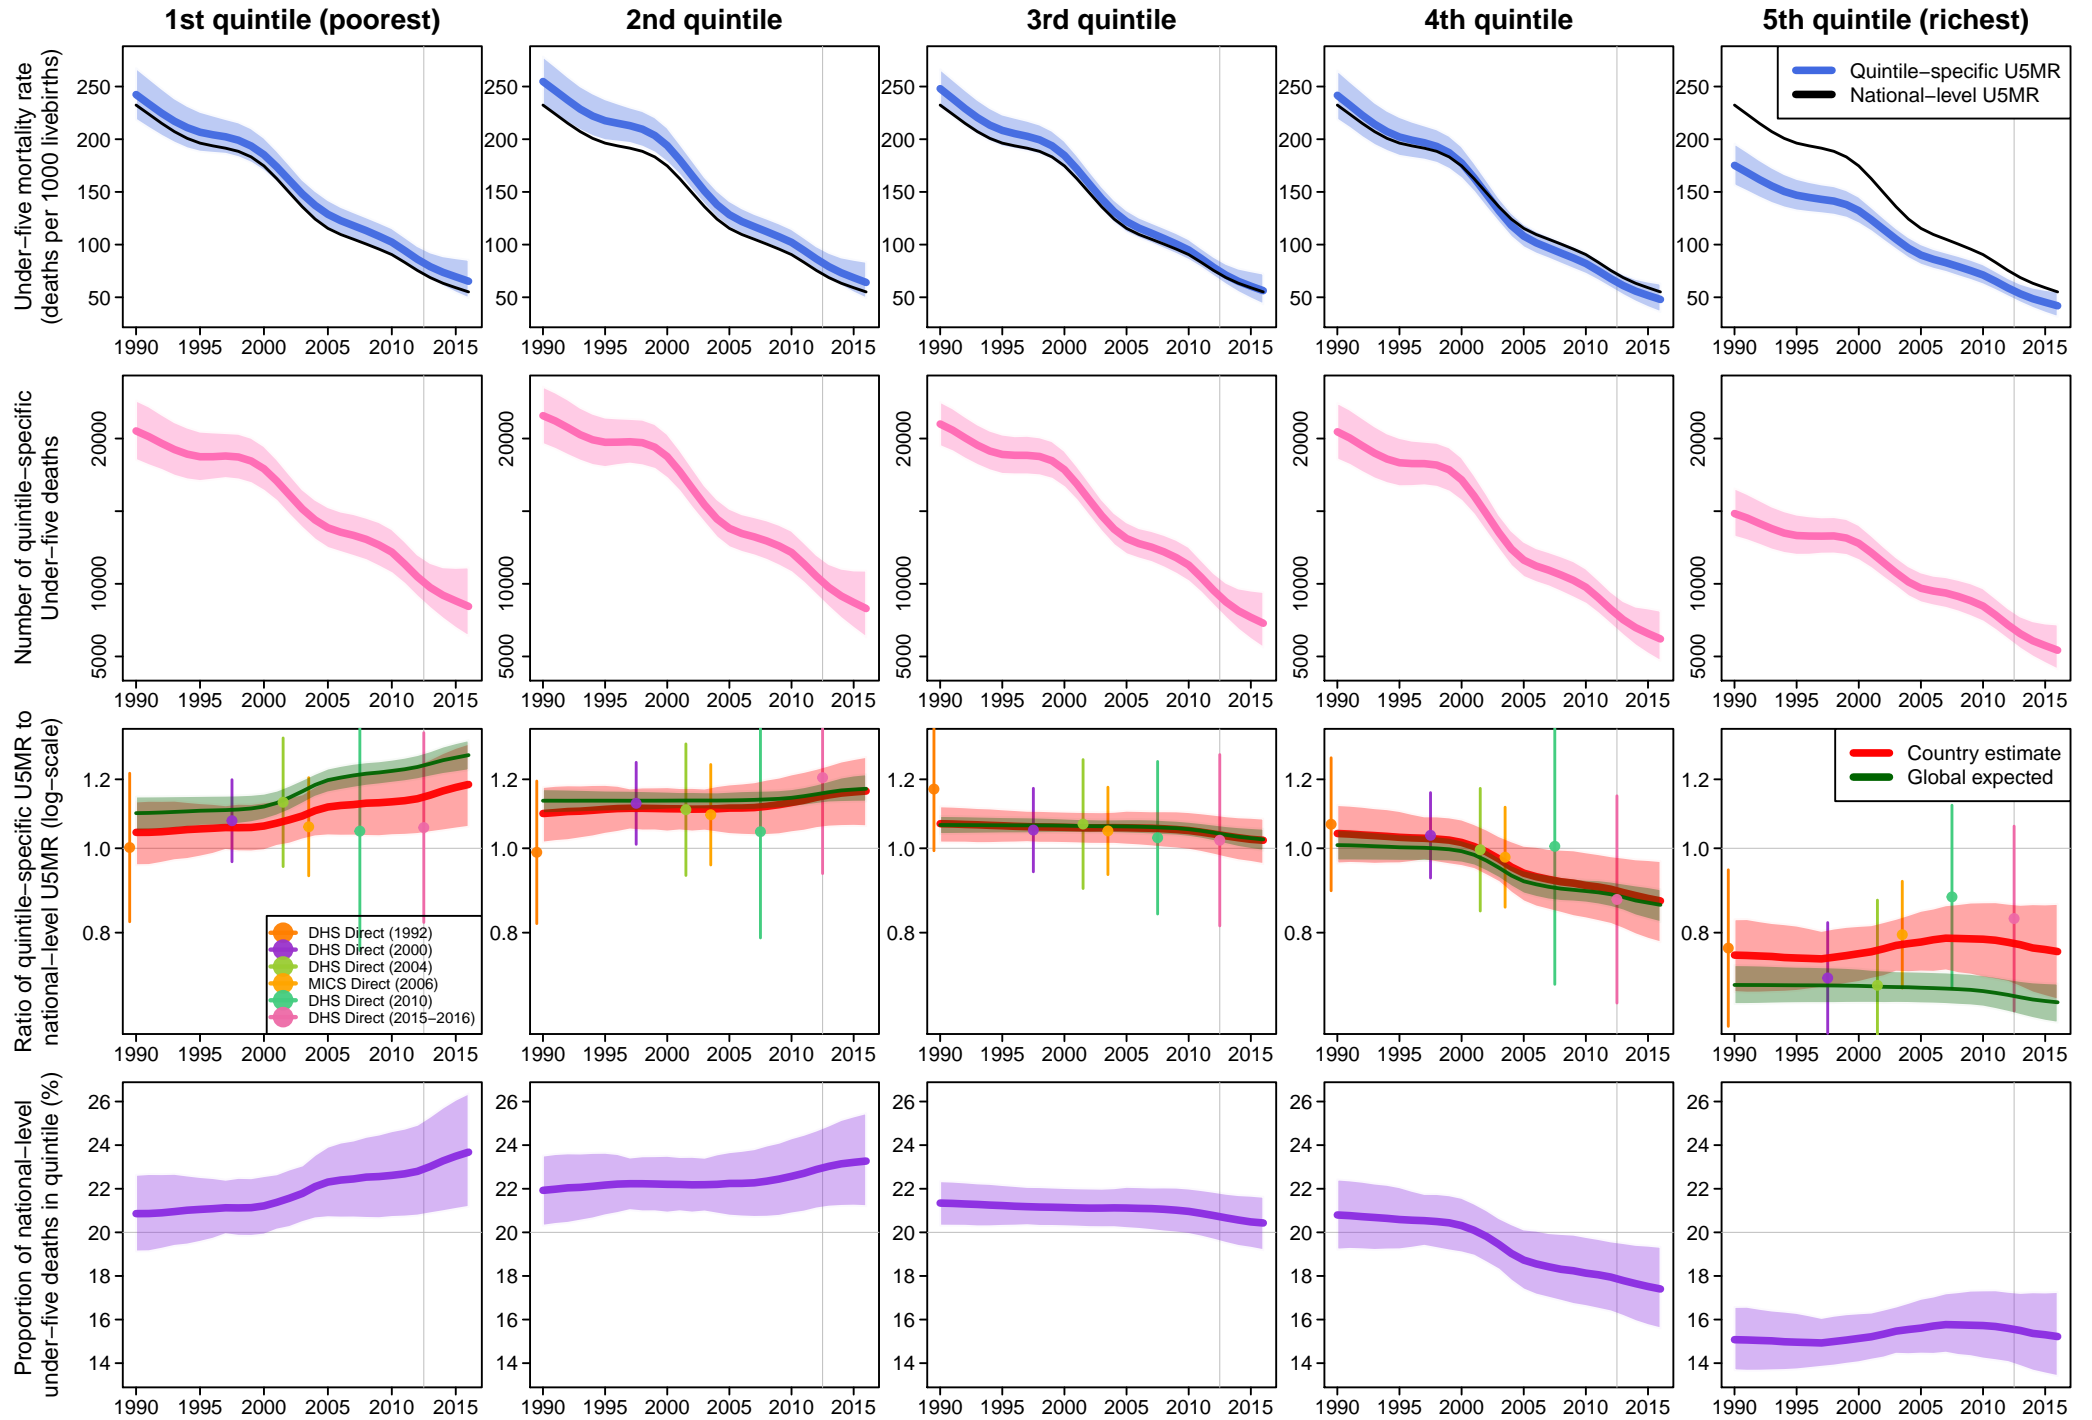



# Maldives

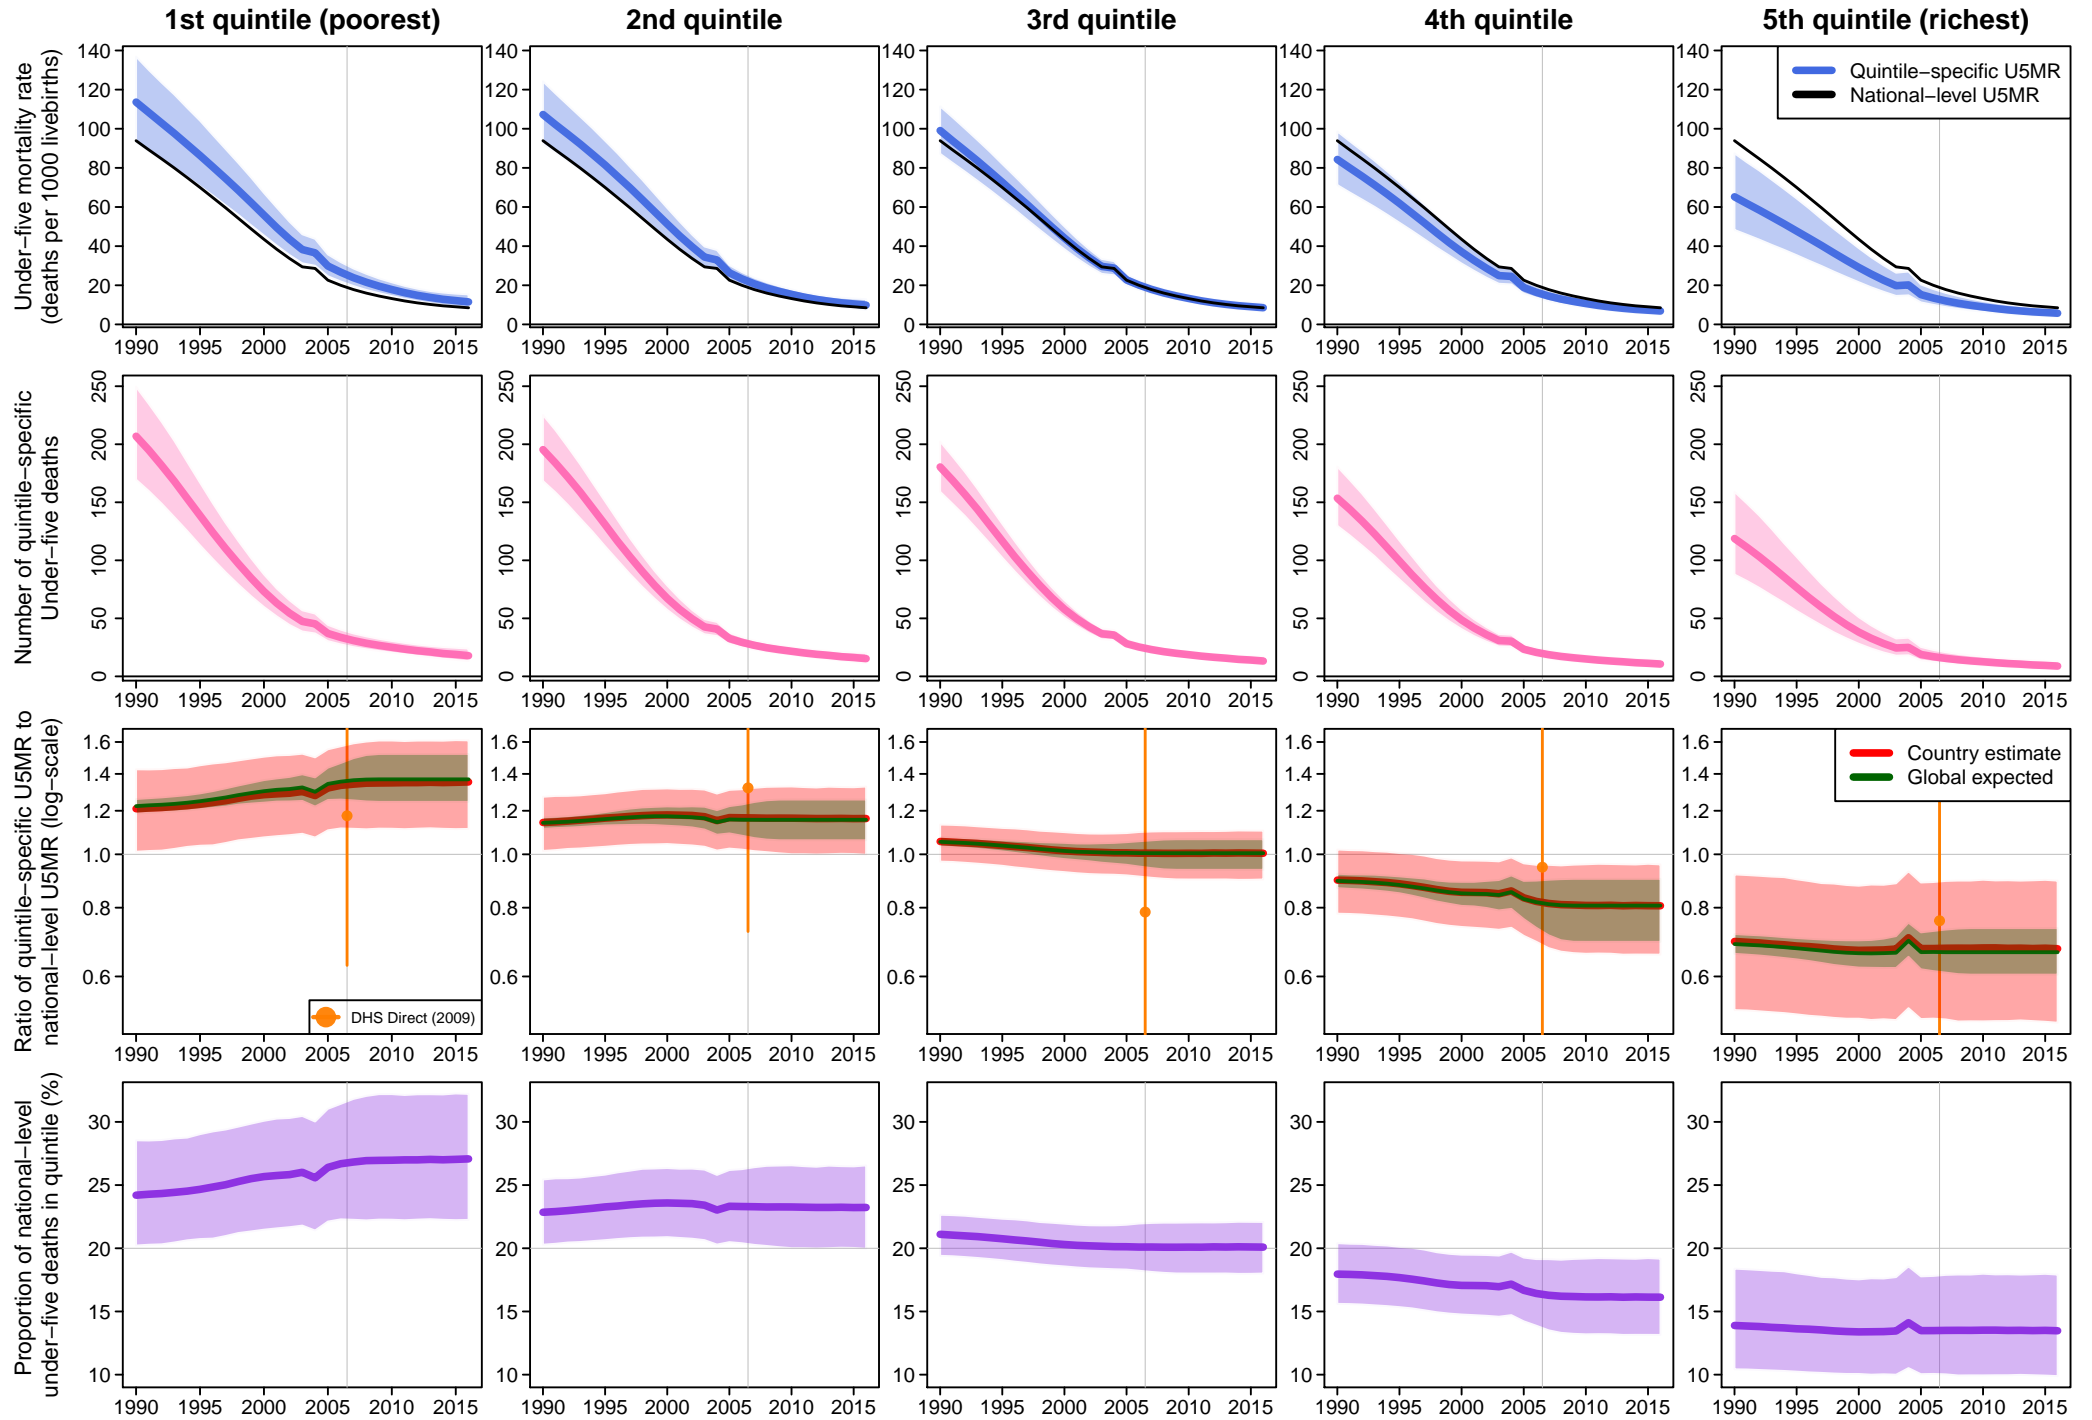

# Mali

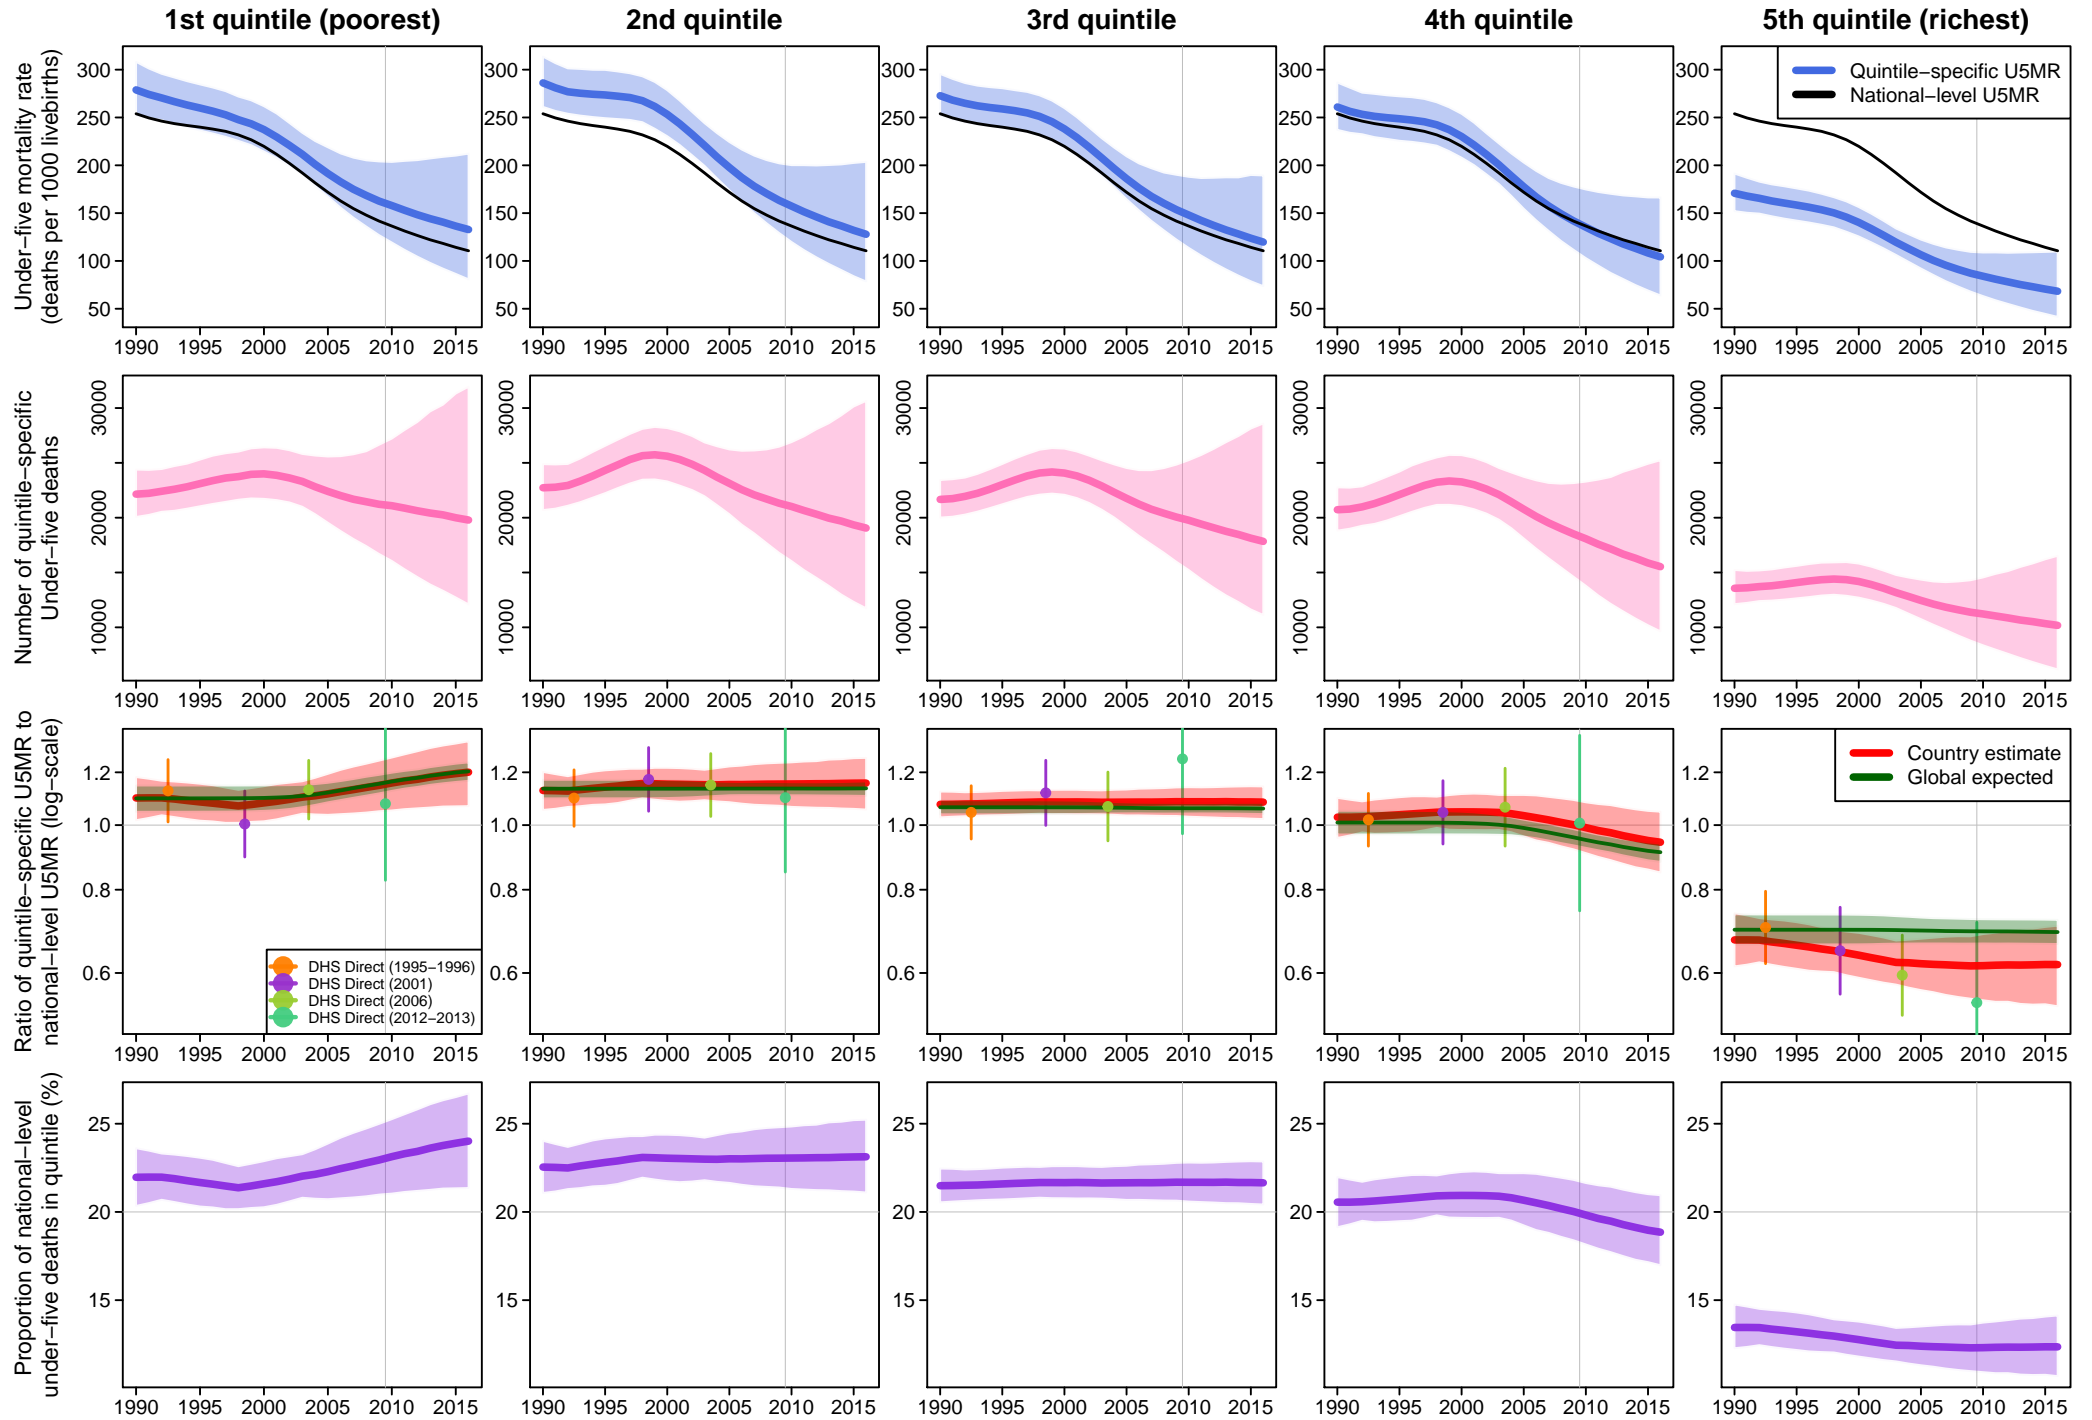

# Mauritania

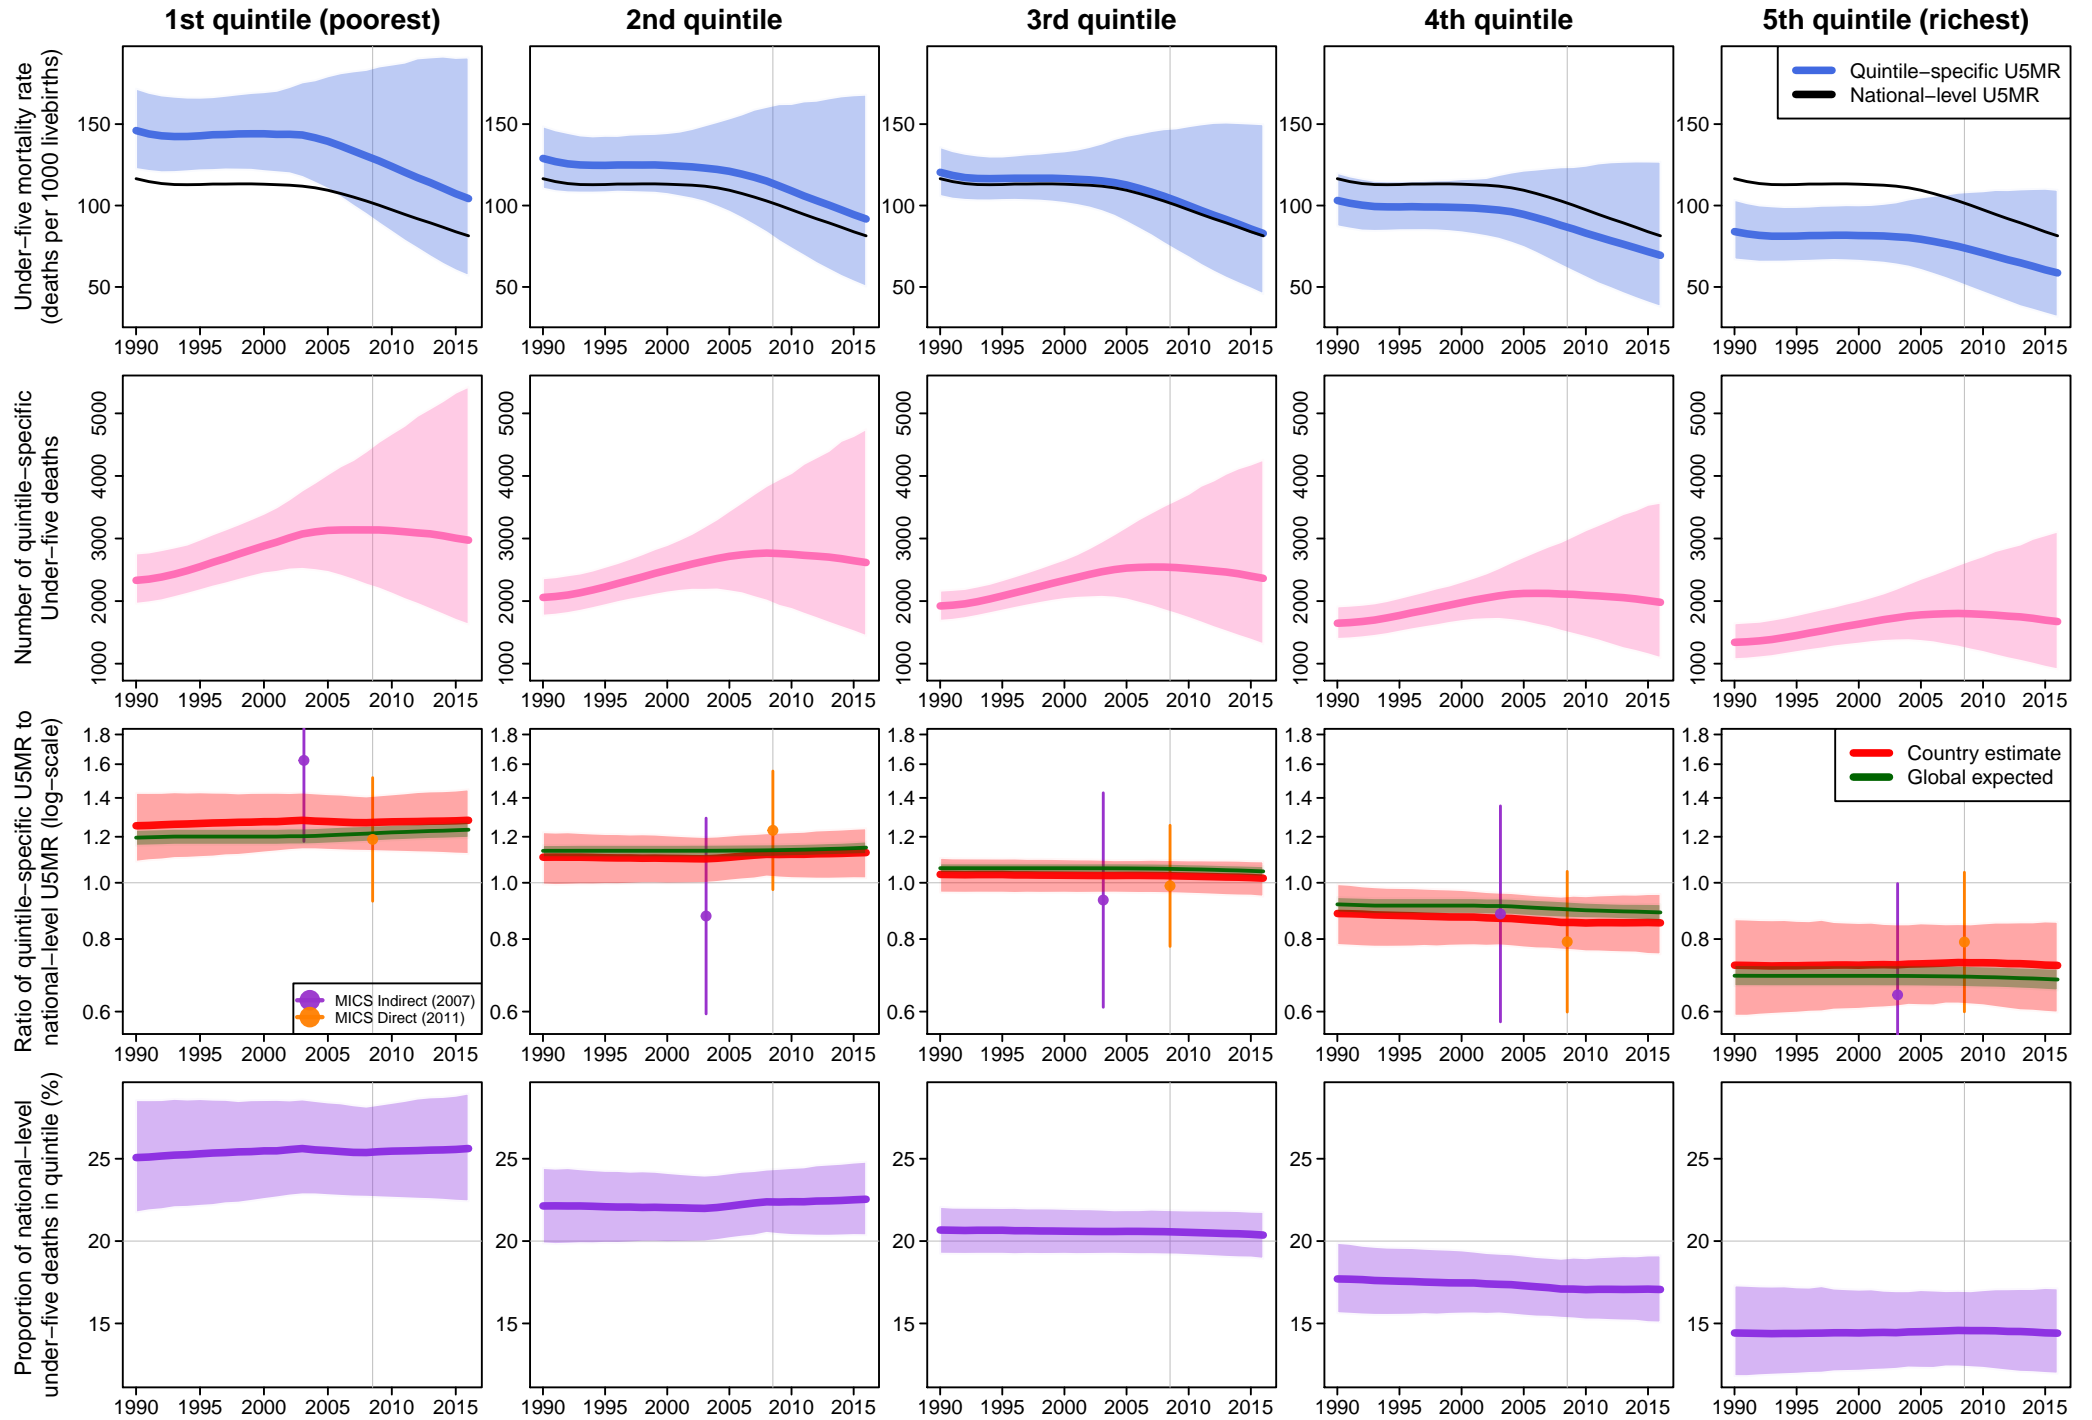

# Mongolia

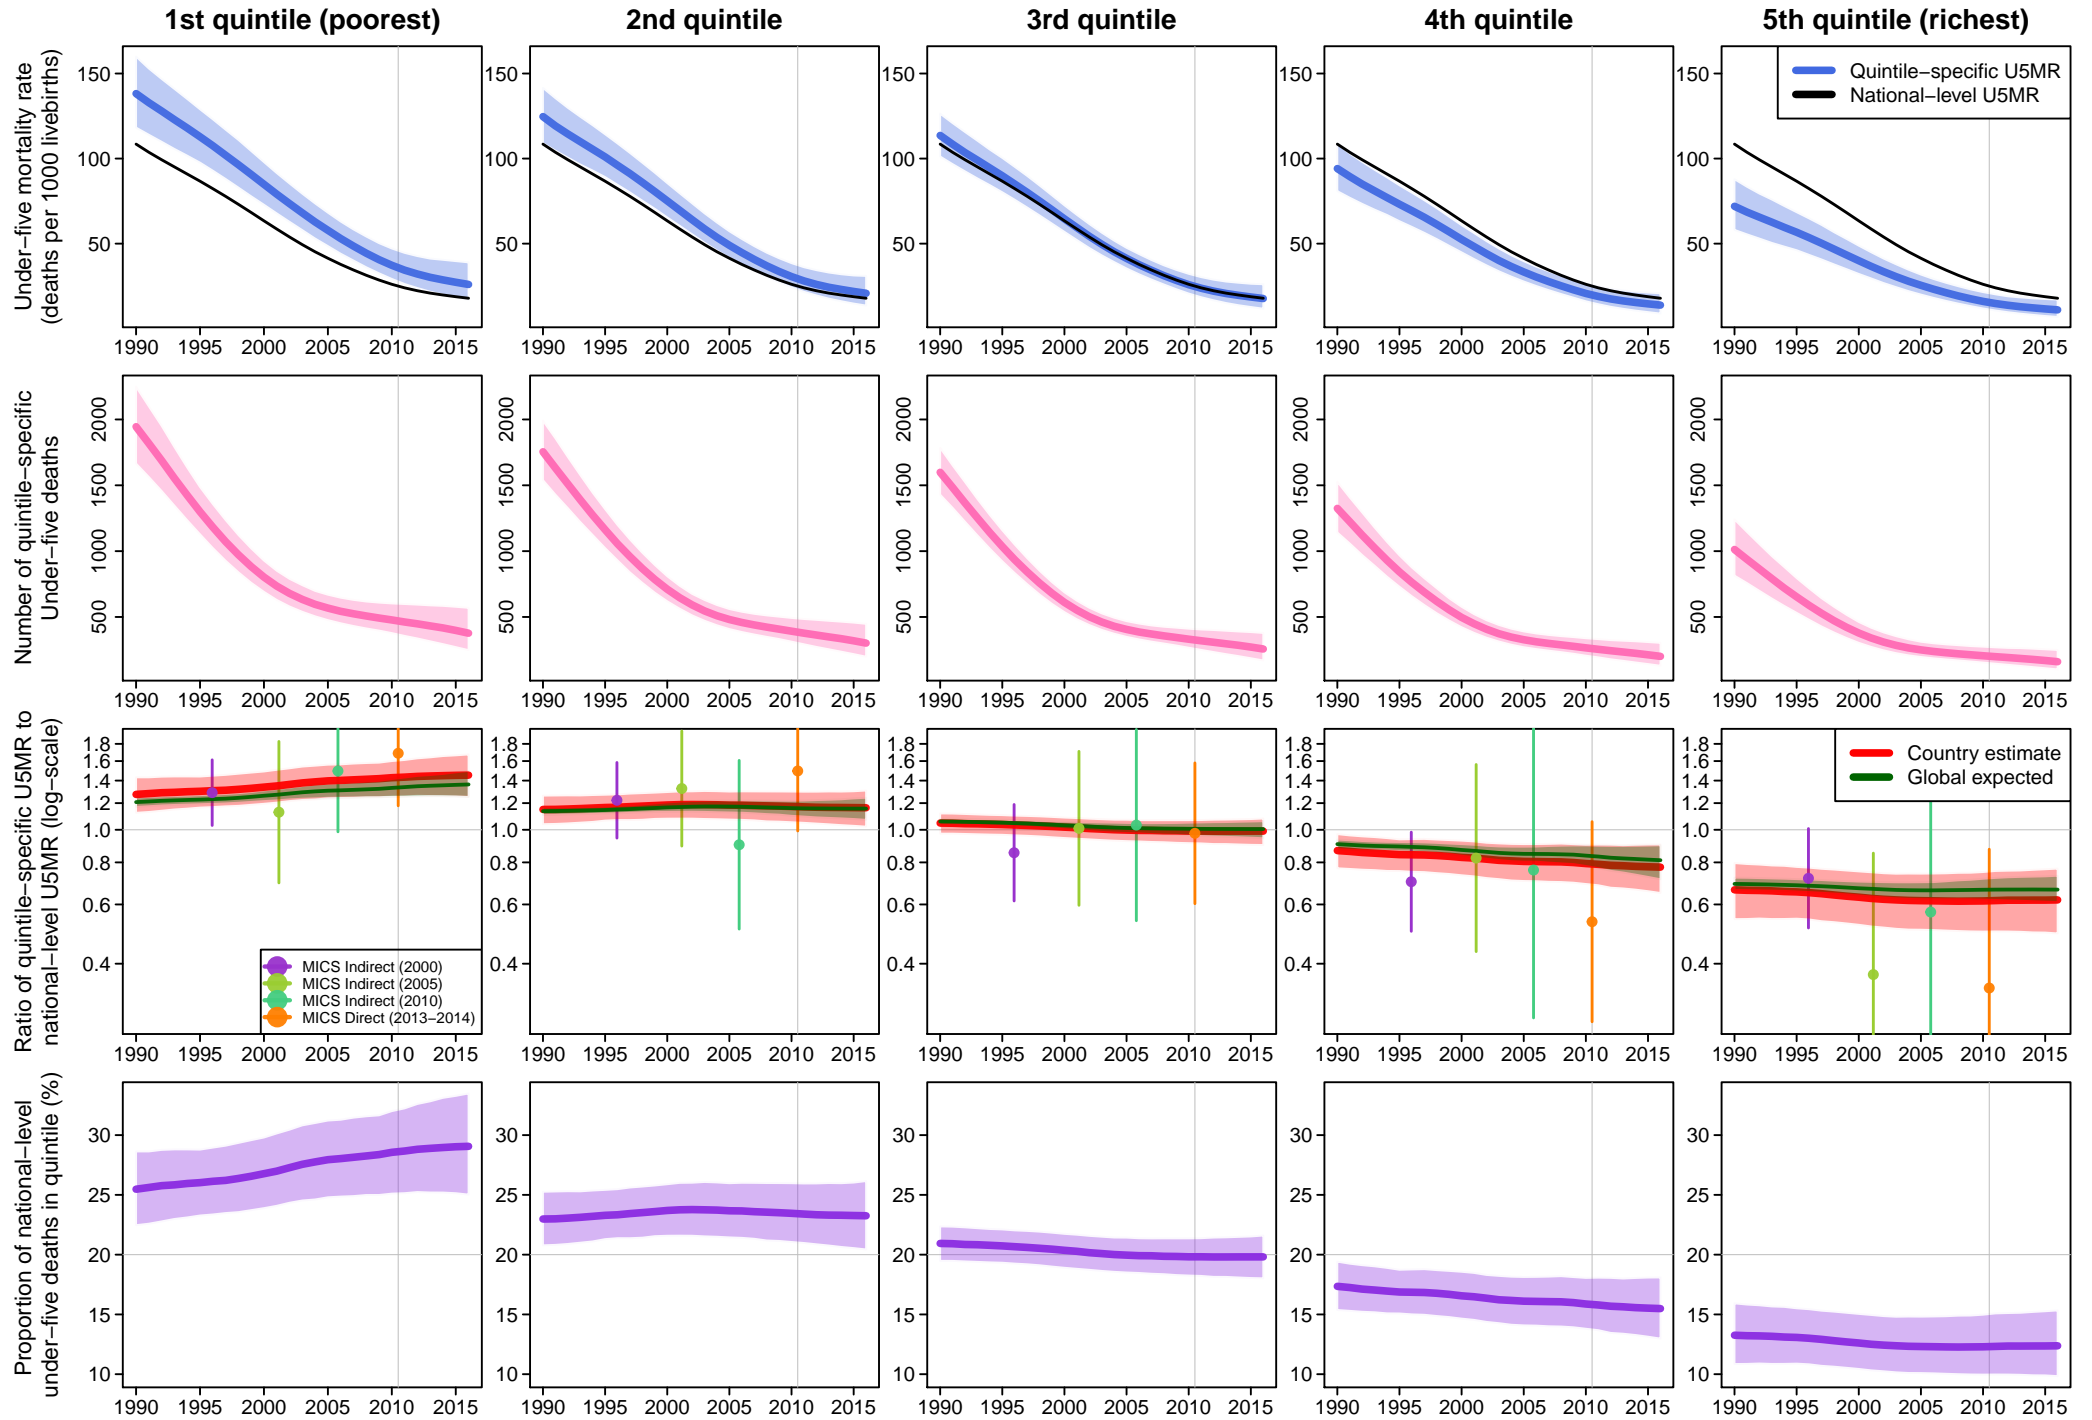

# Morocco

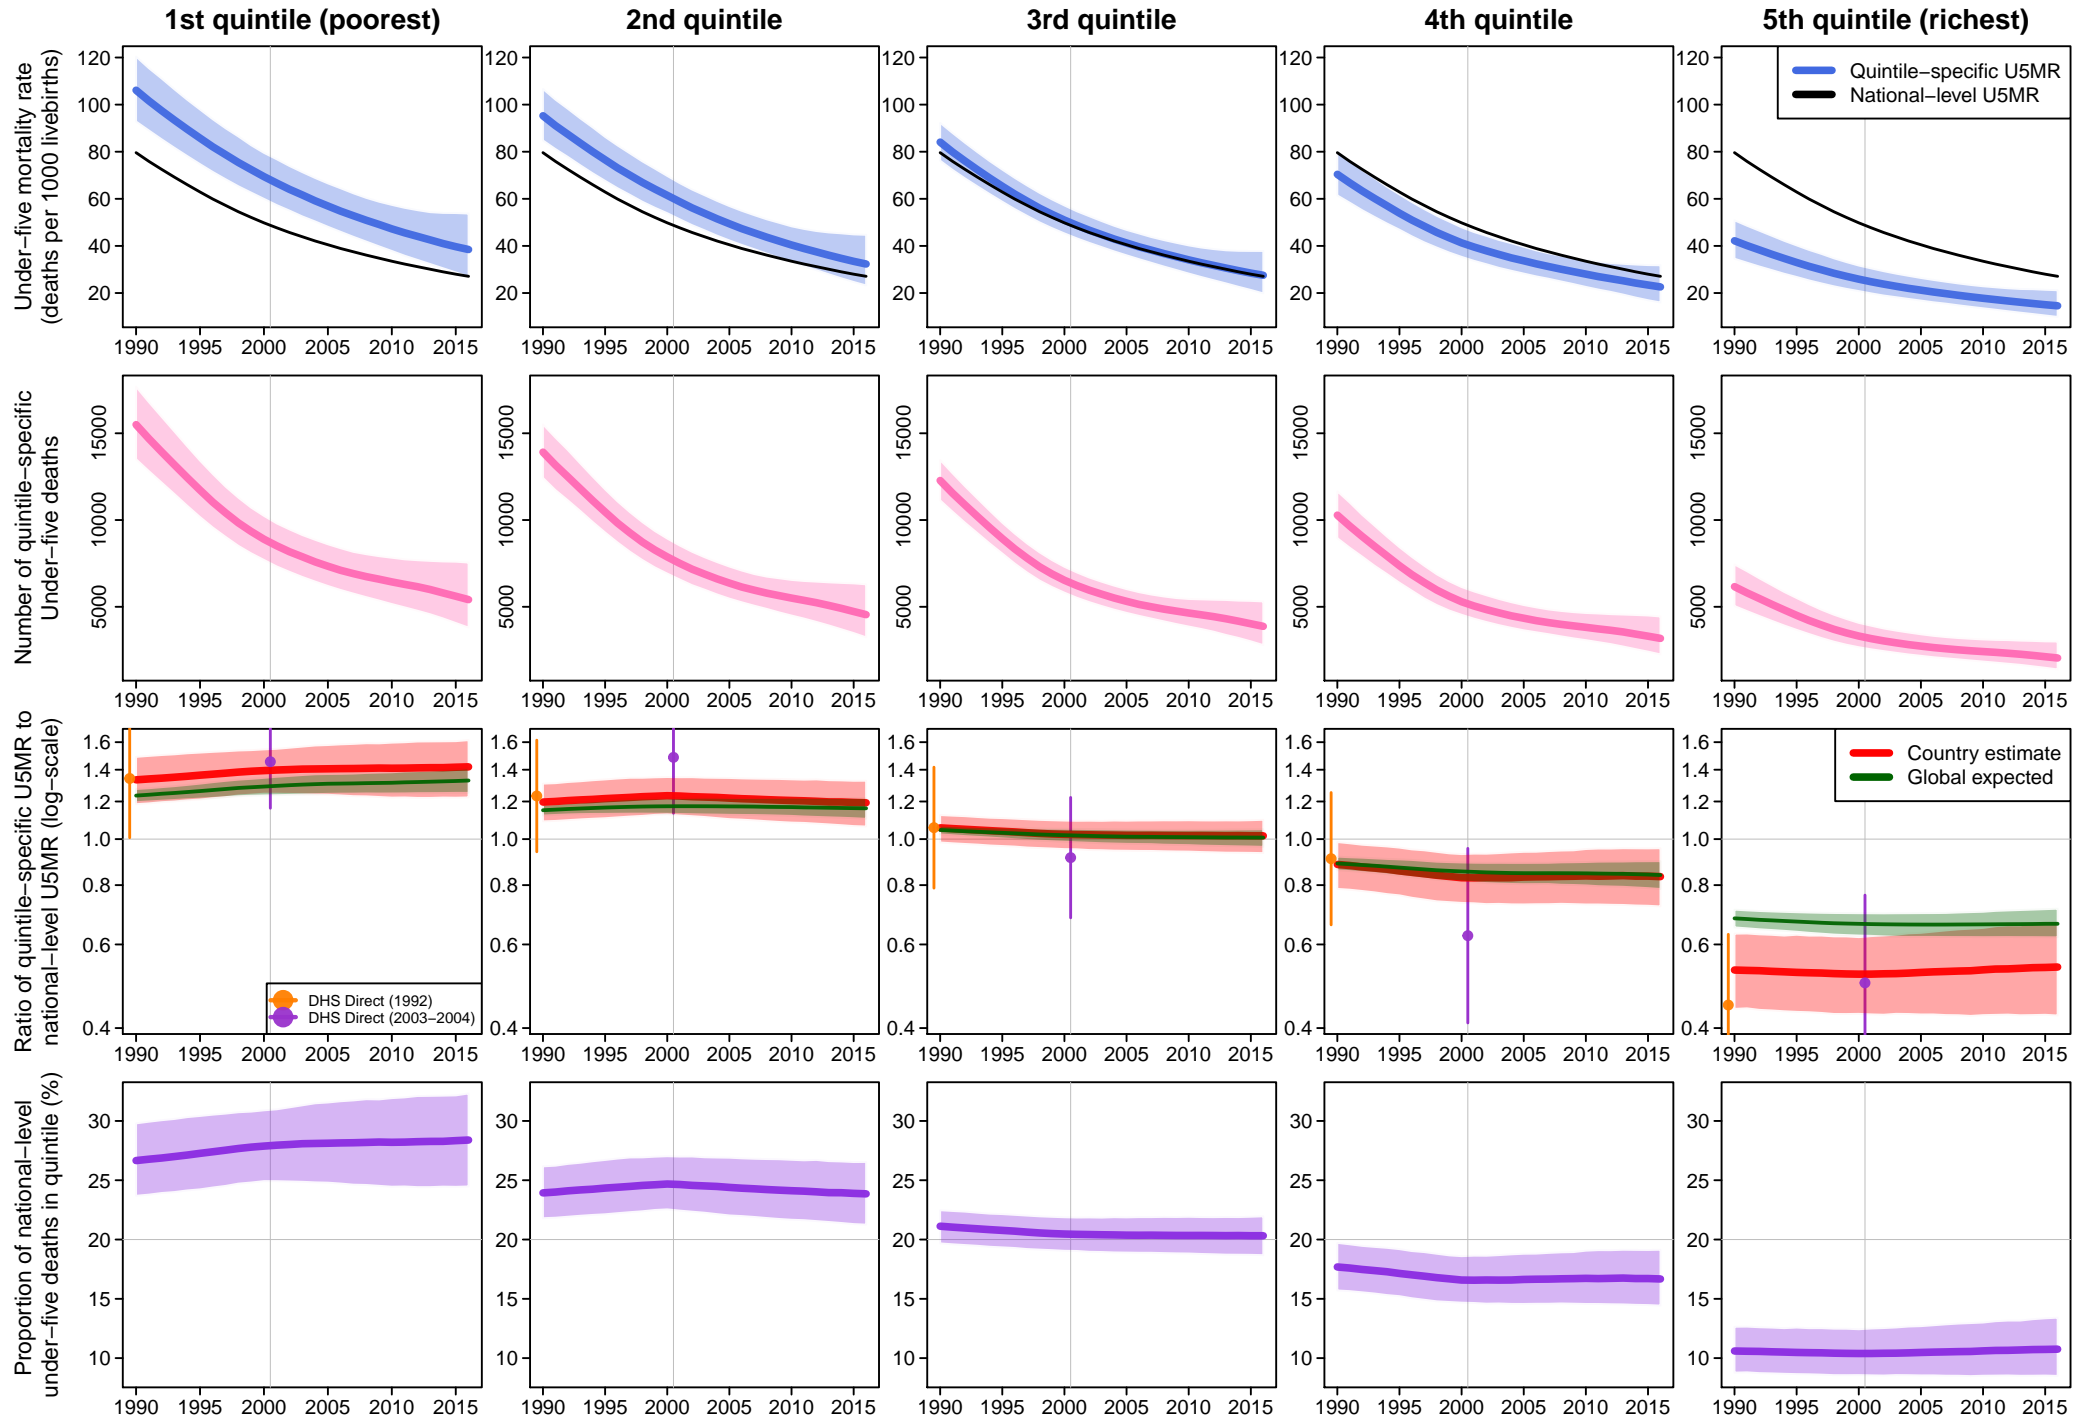

# Mozambique

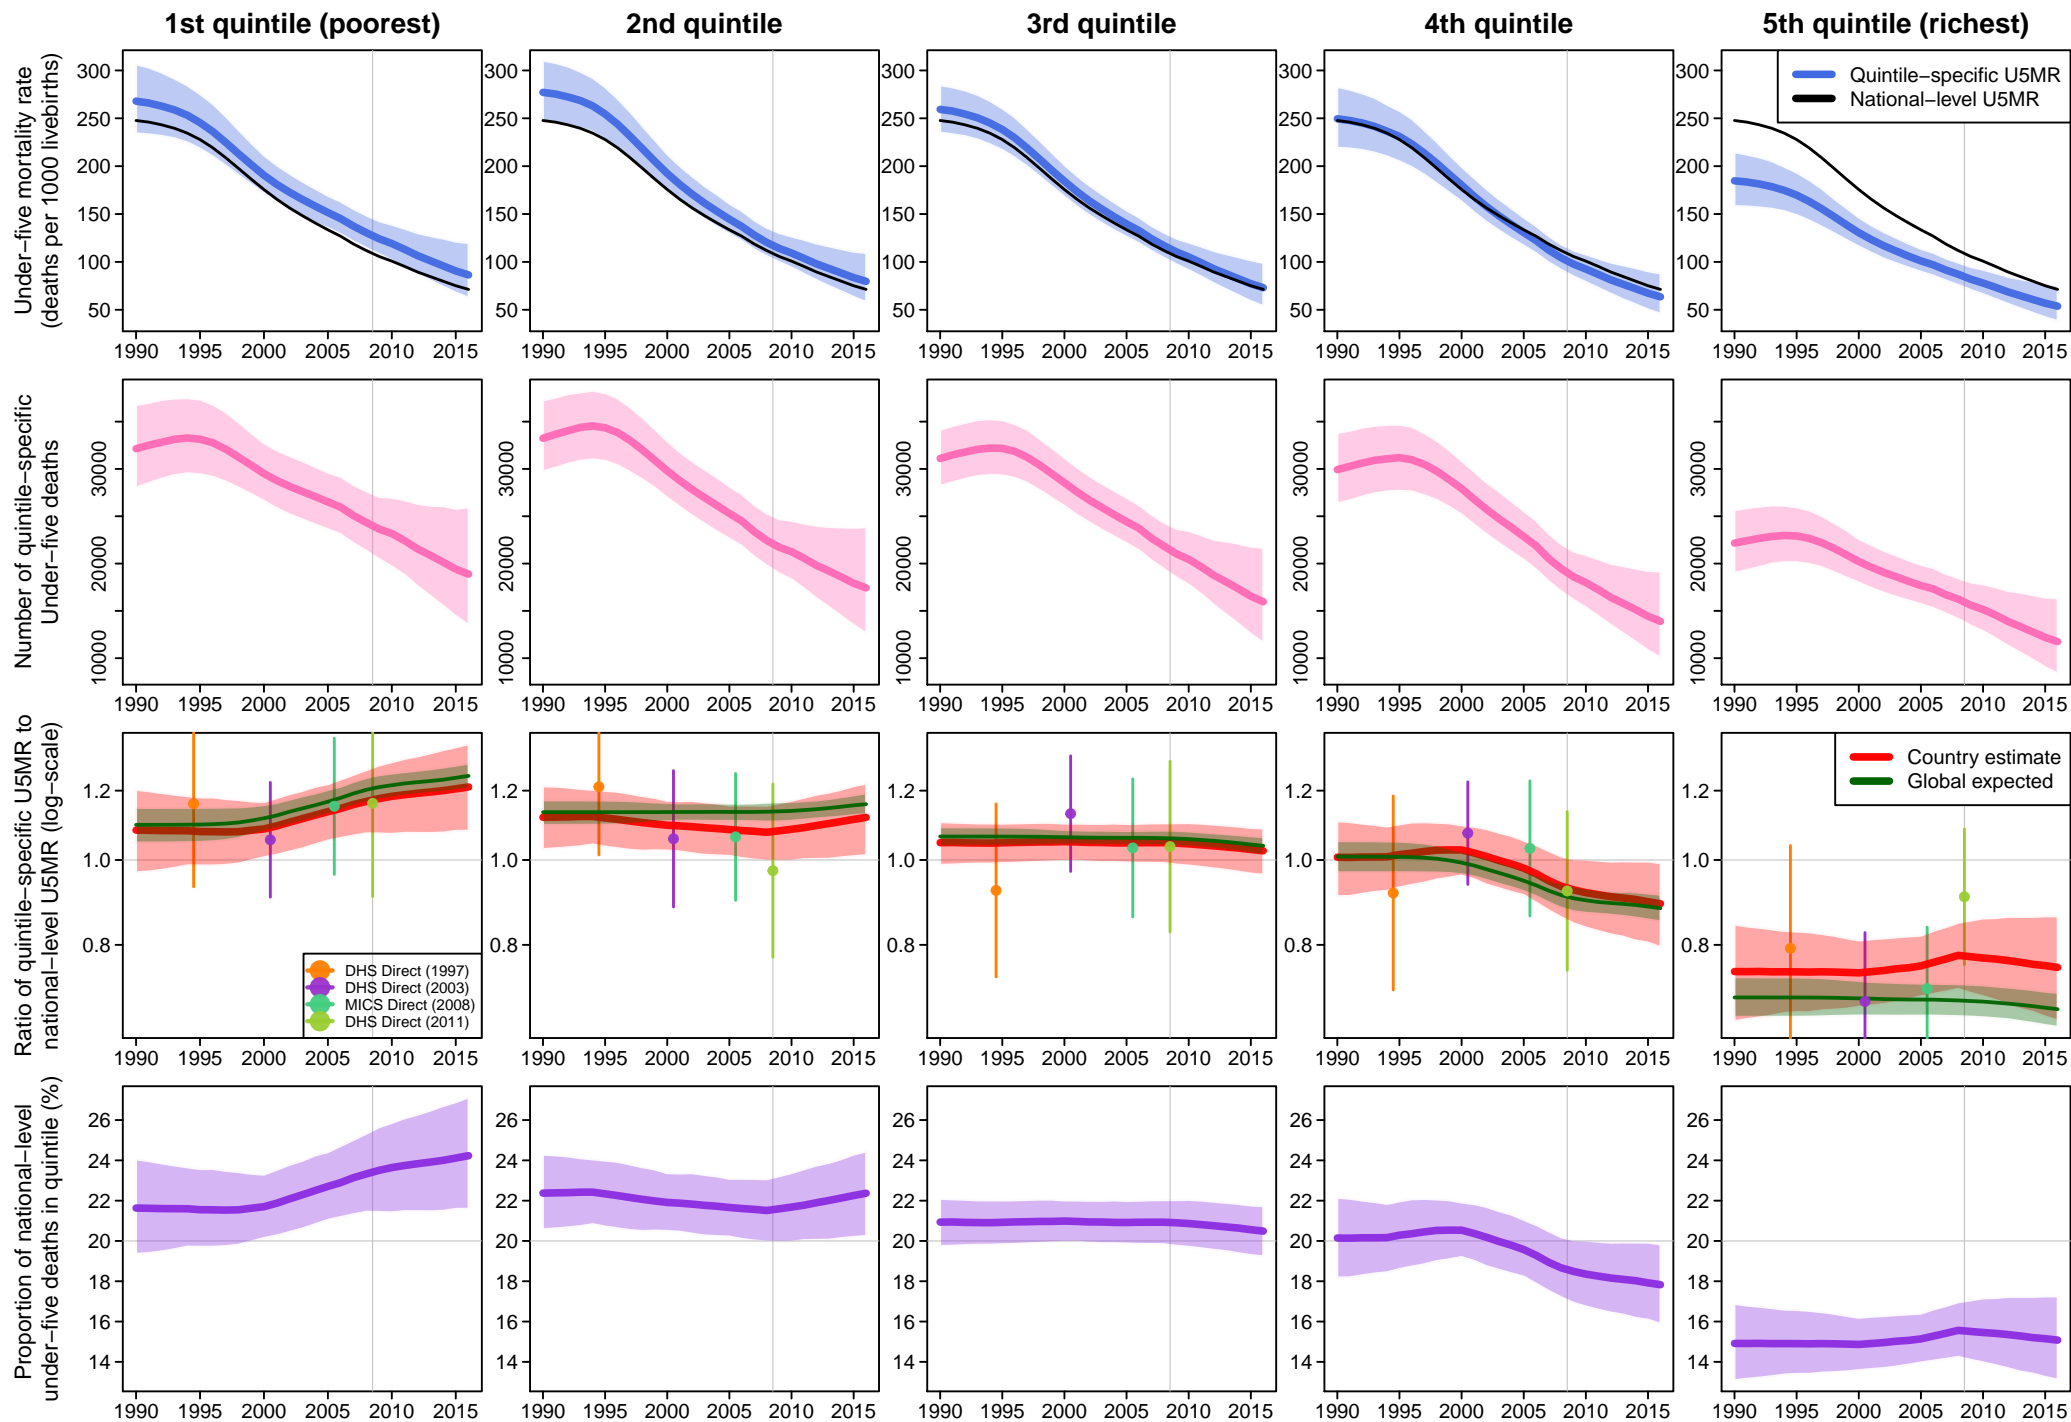

# Myanmar

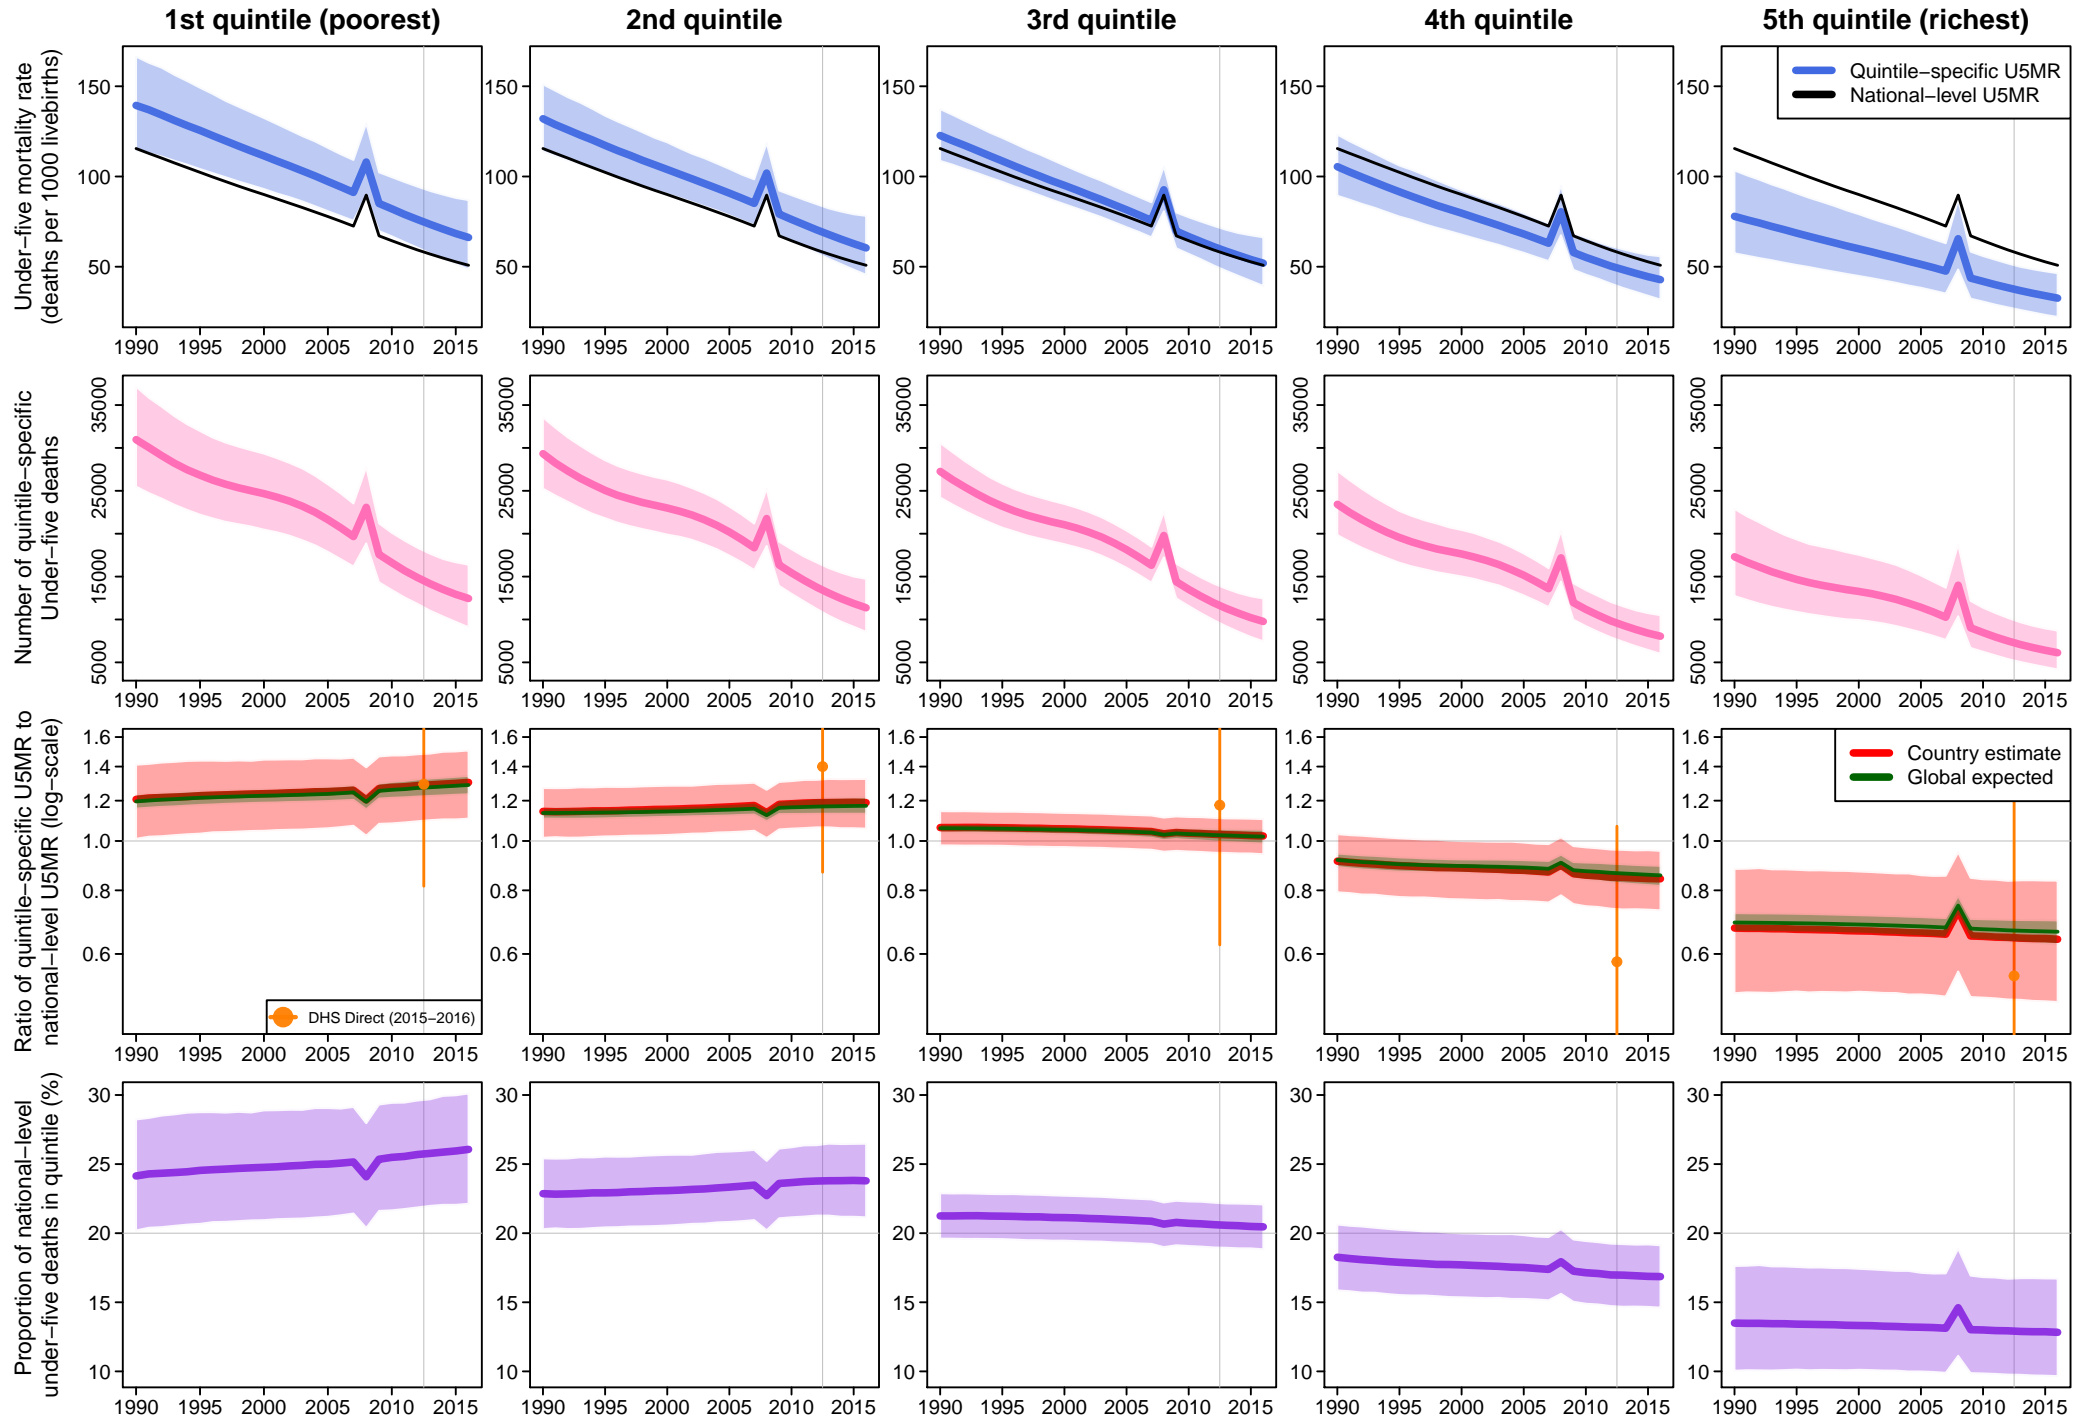

# Namibia

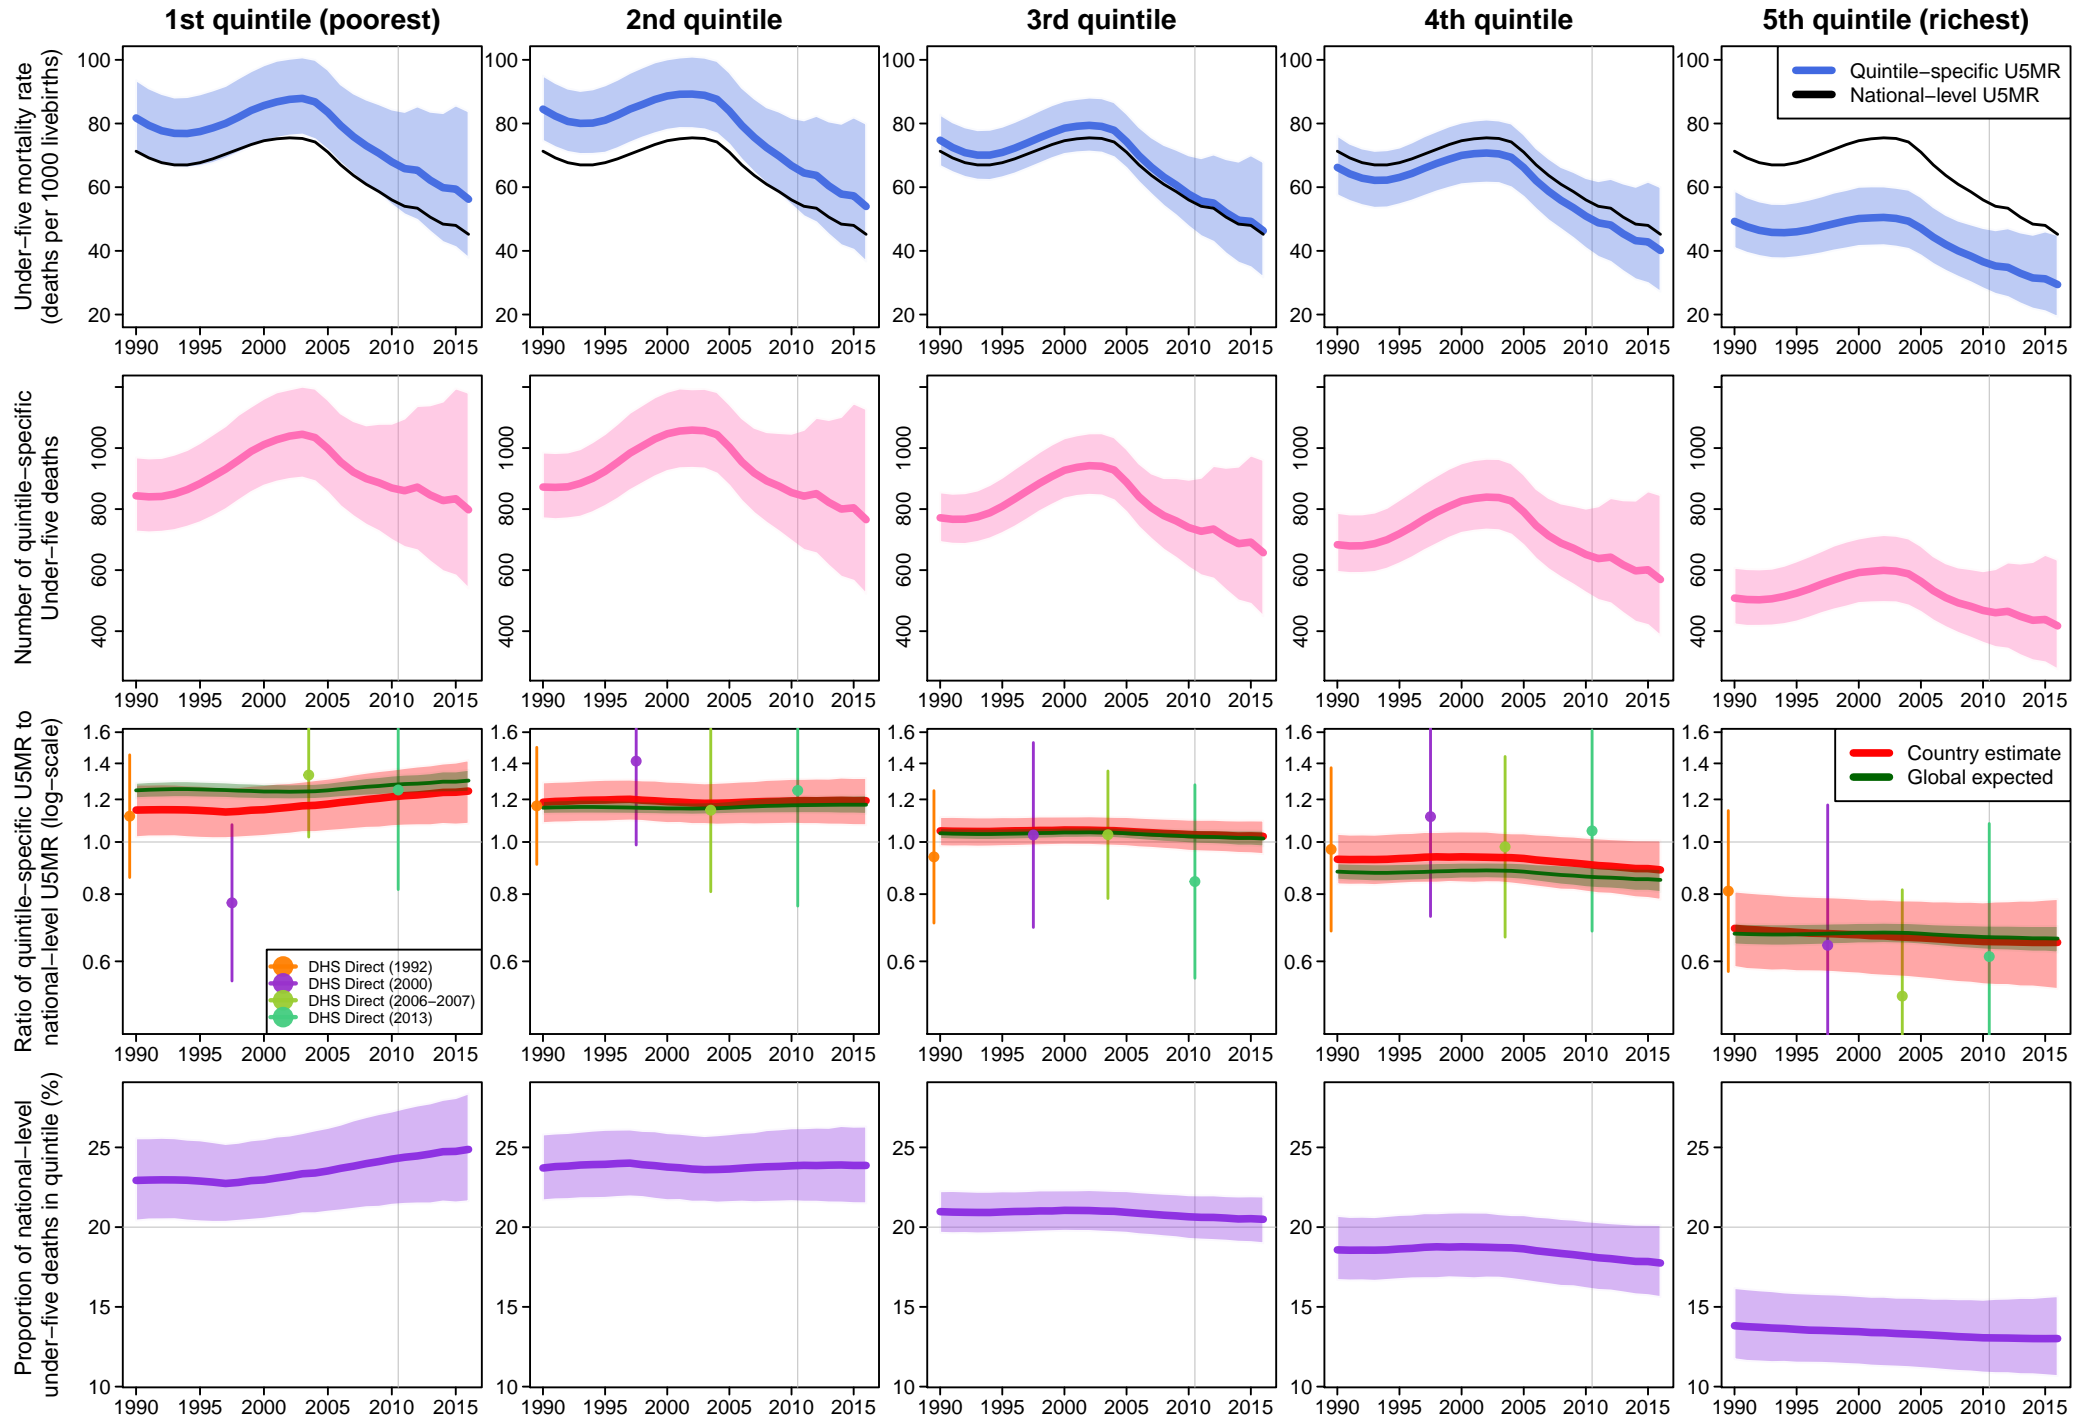



# Nepal

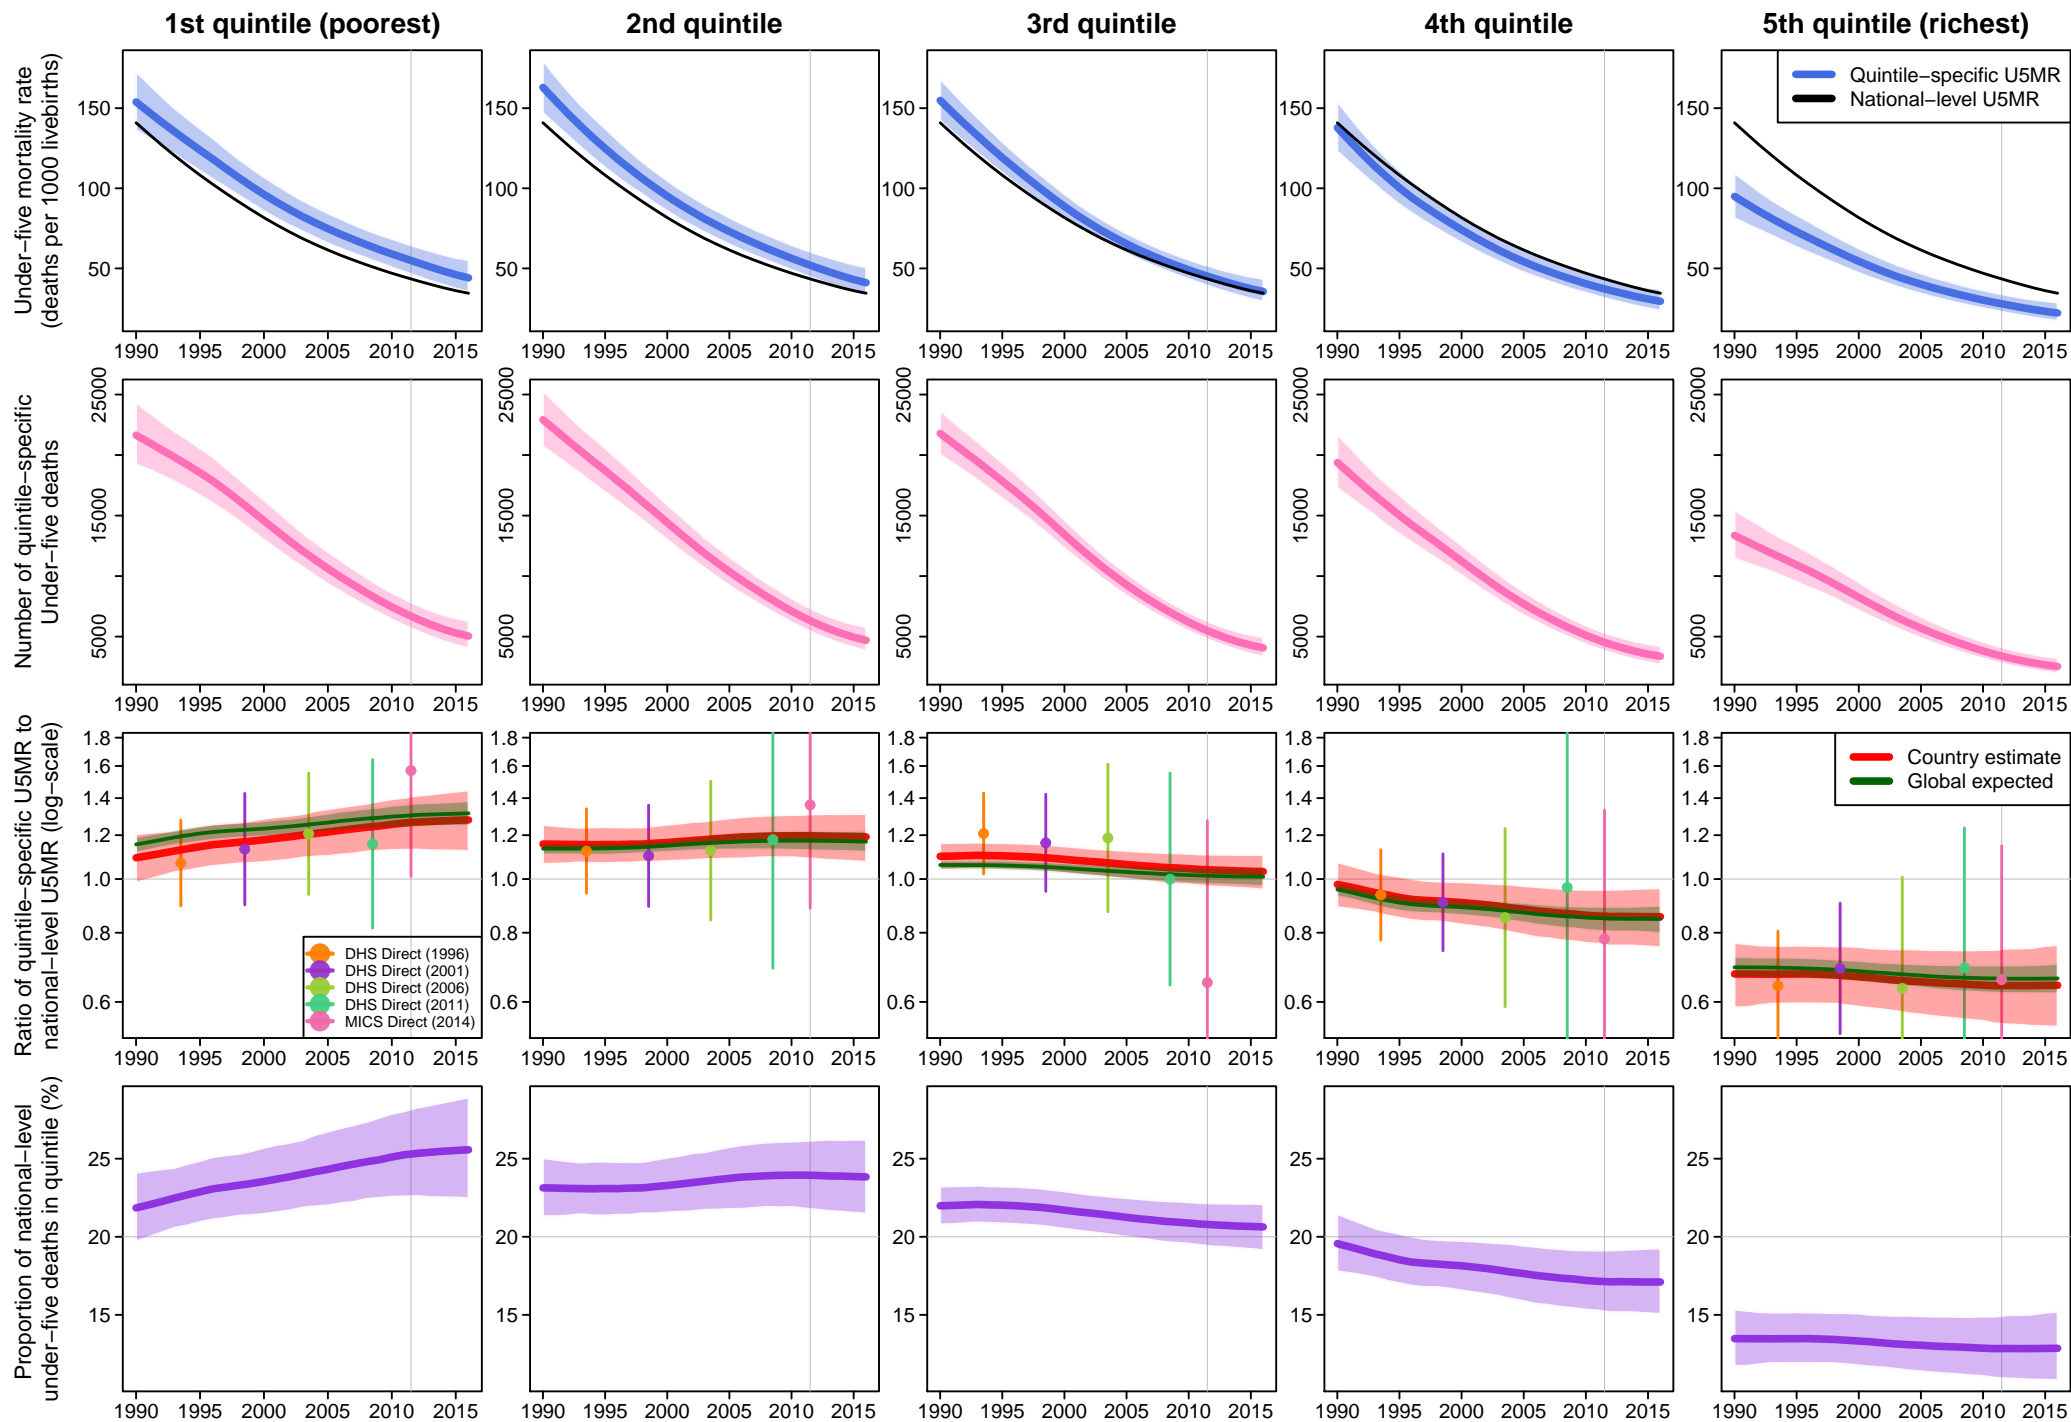

# Nicaragua

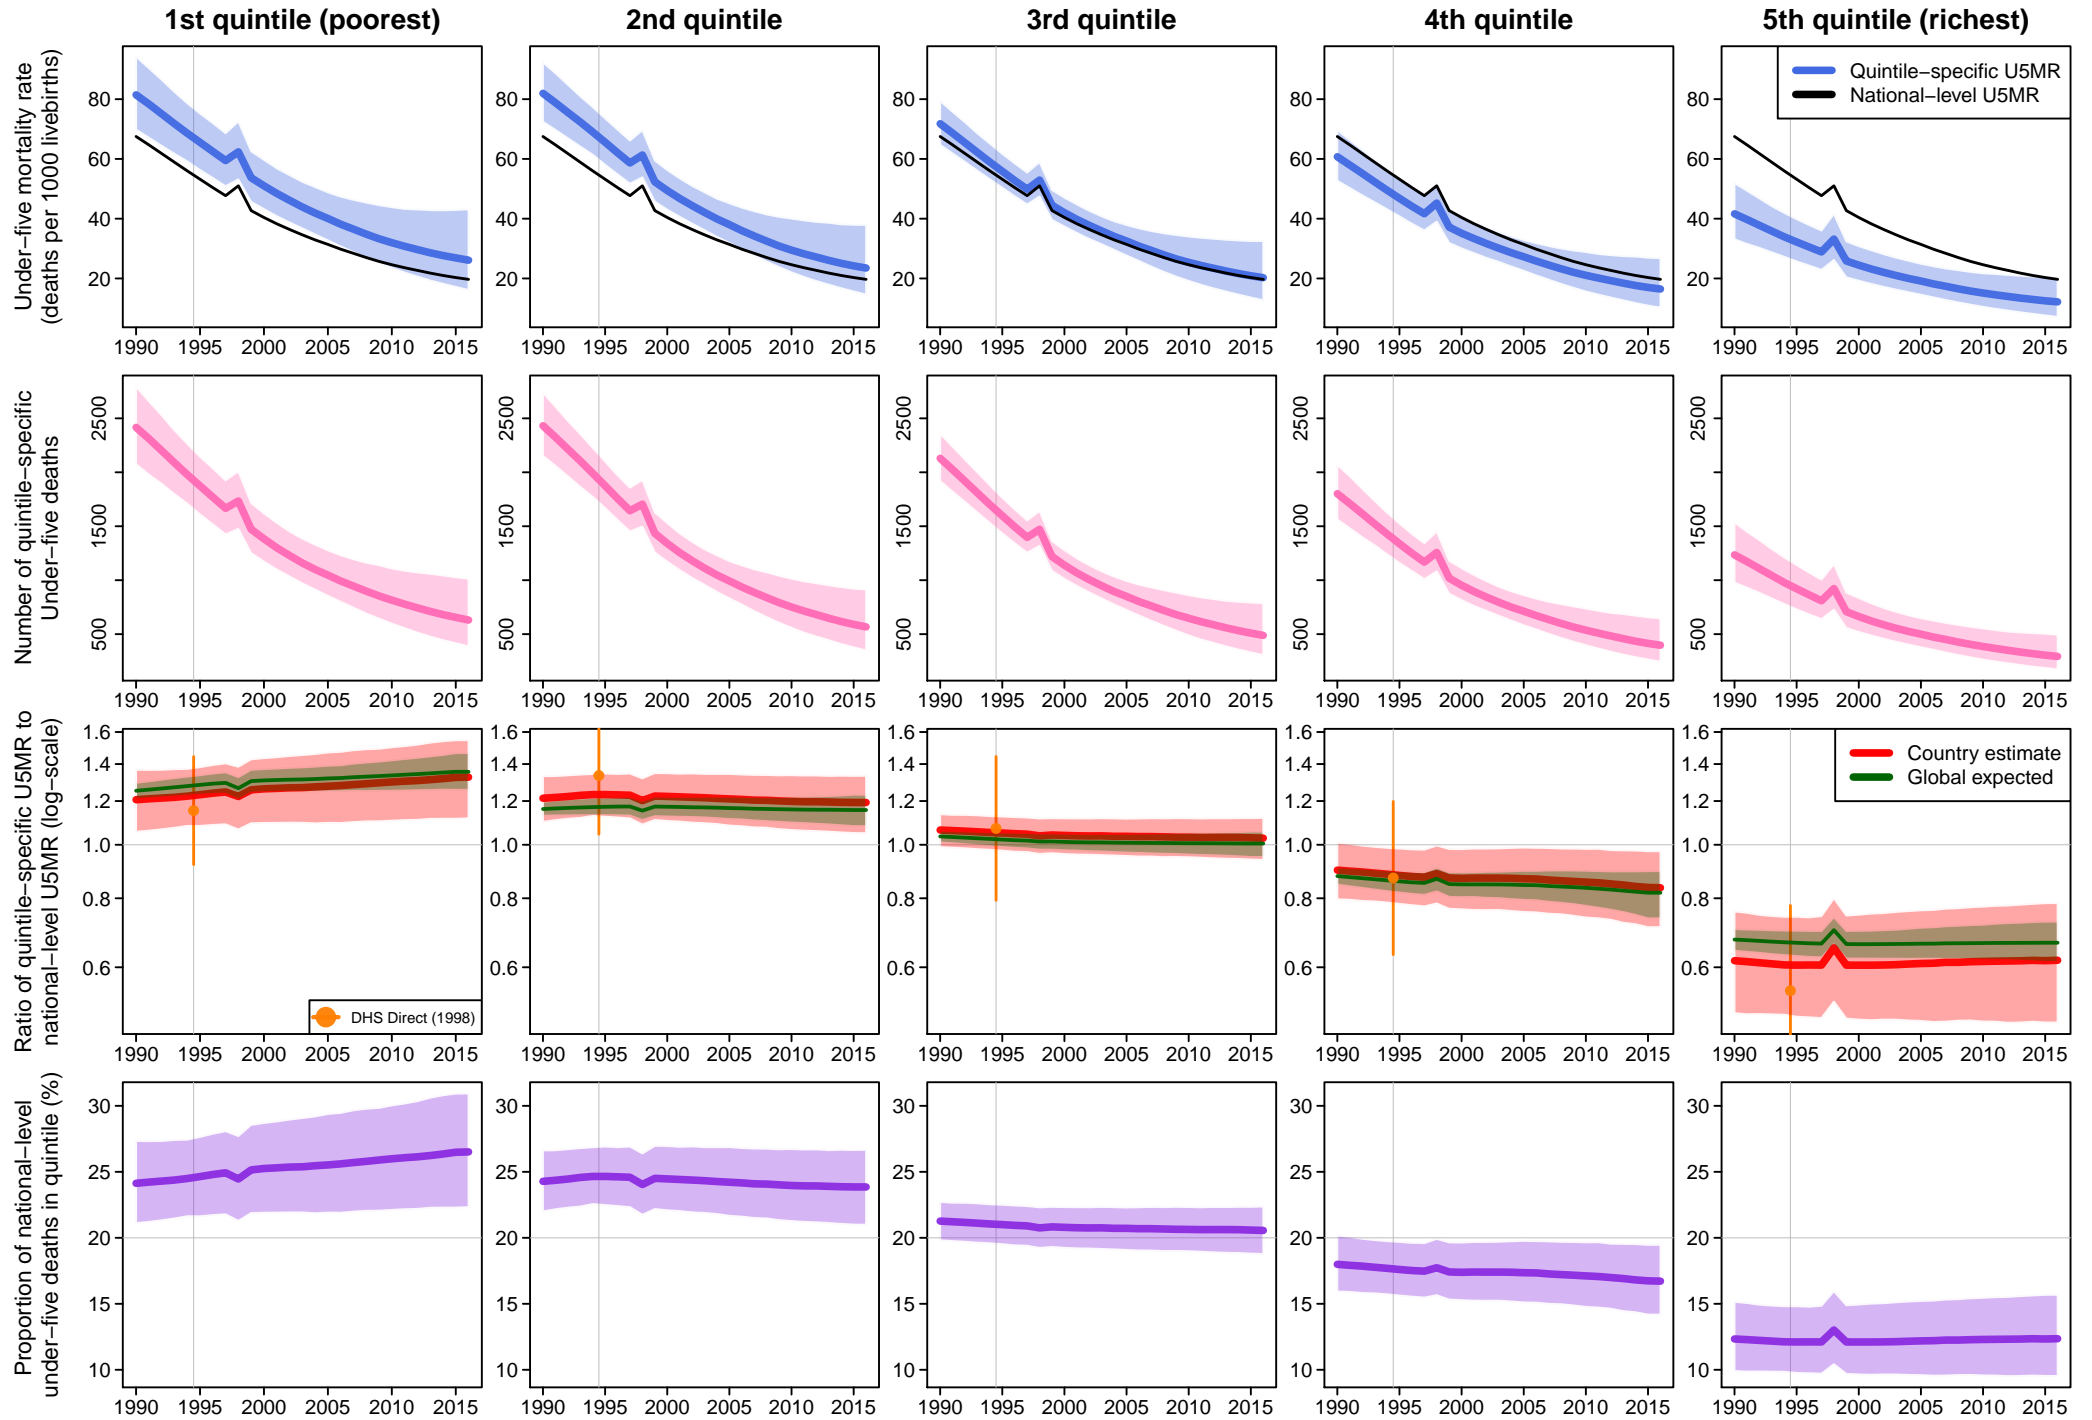

# Niger

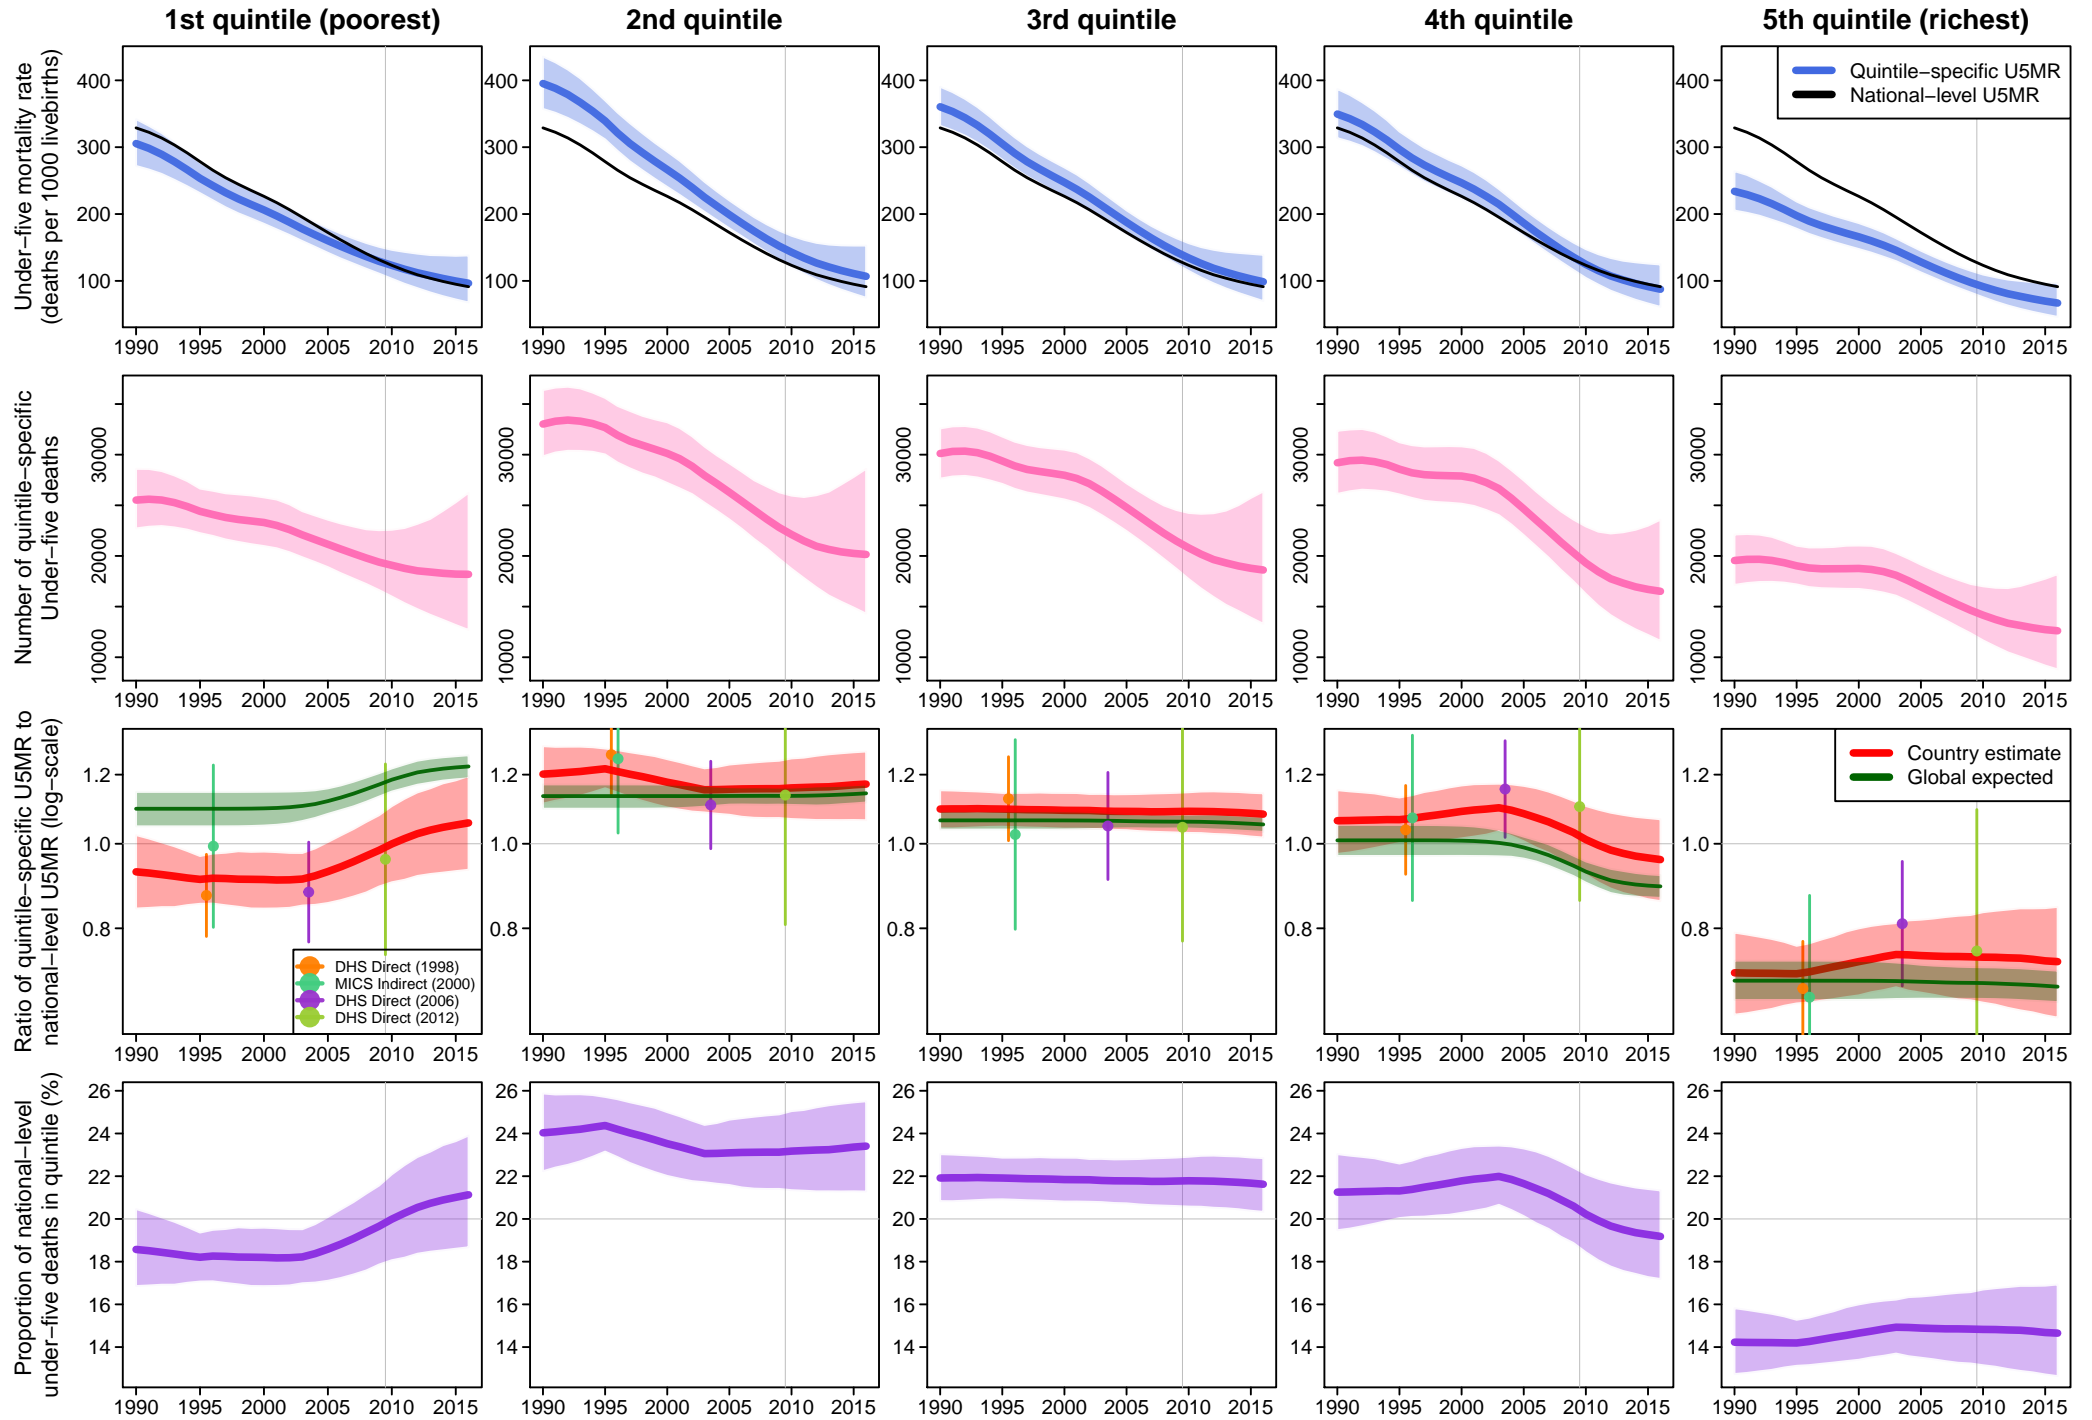

# Nigeria

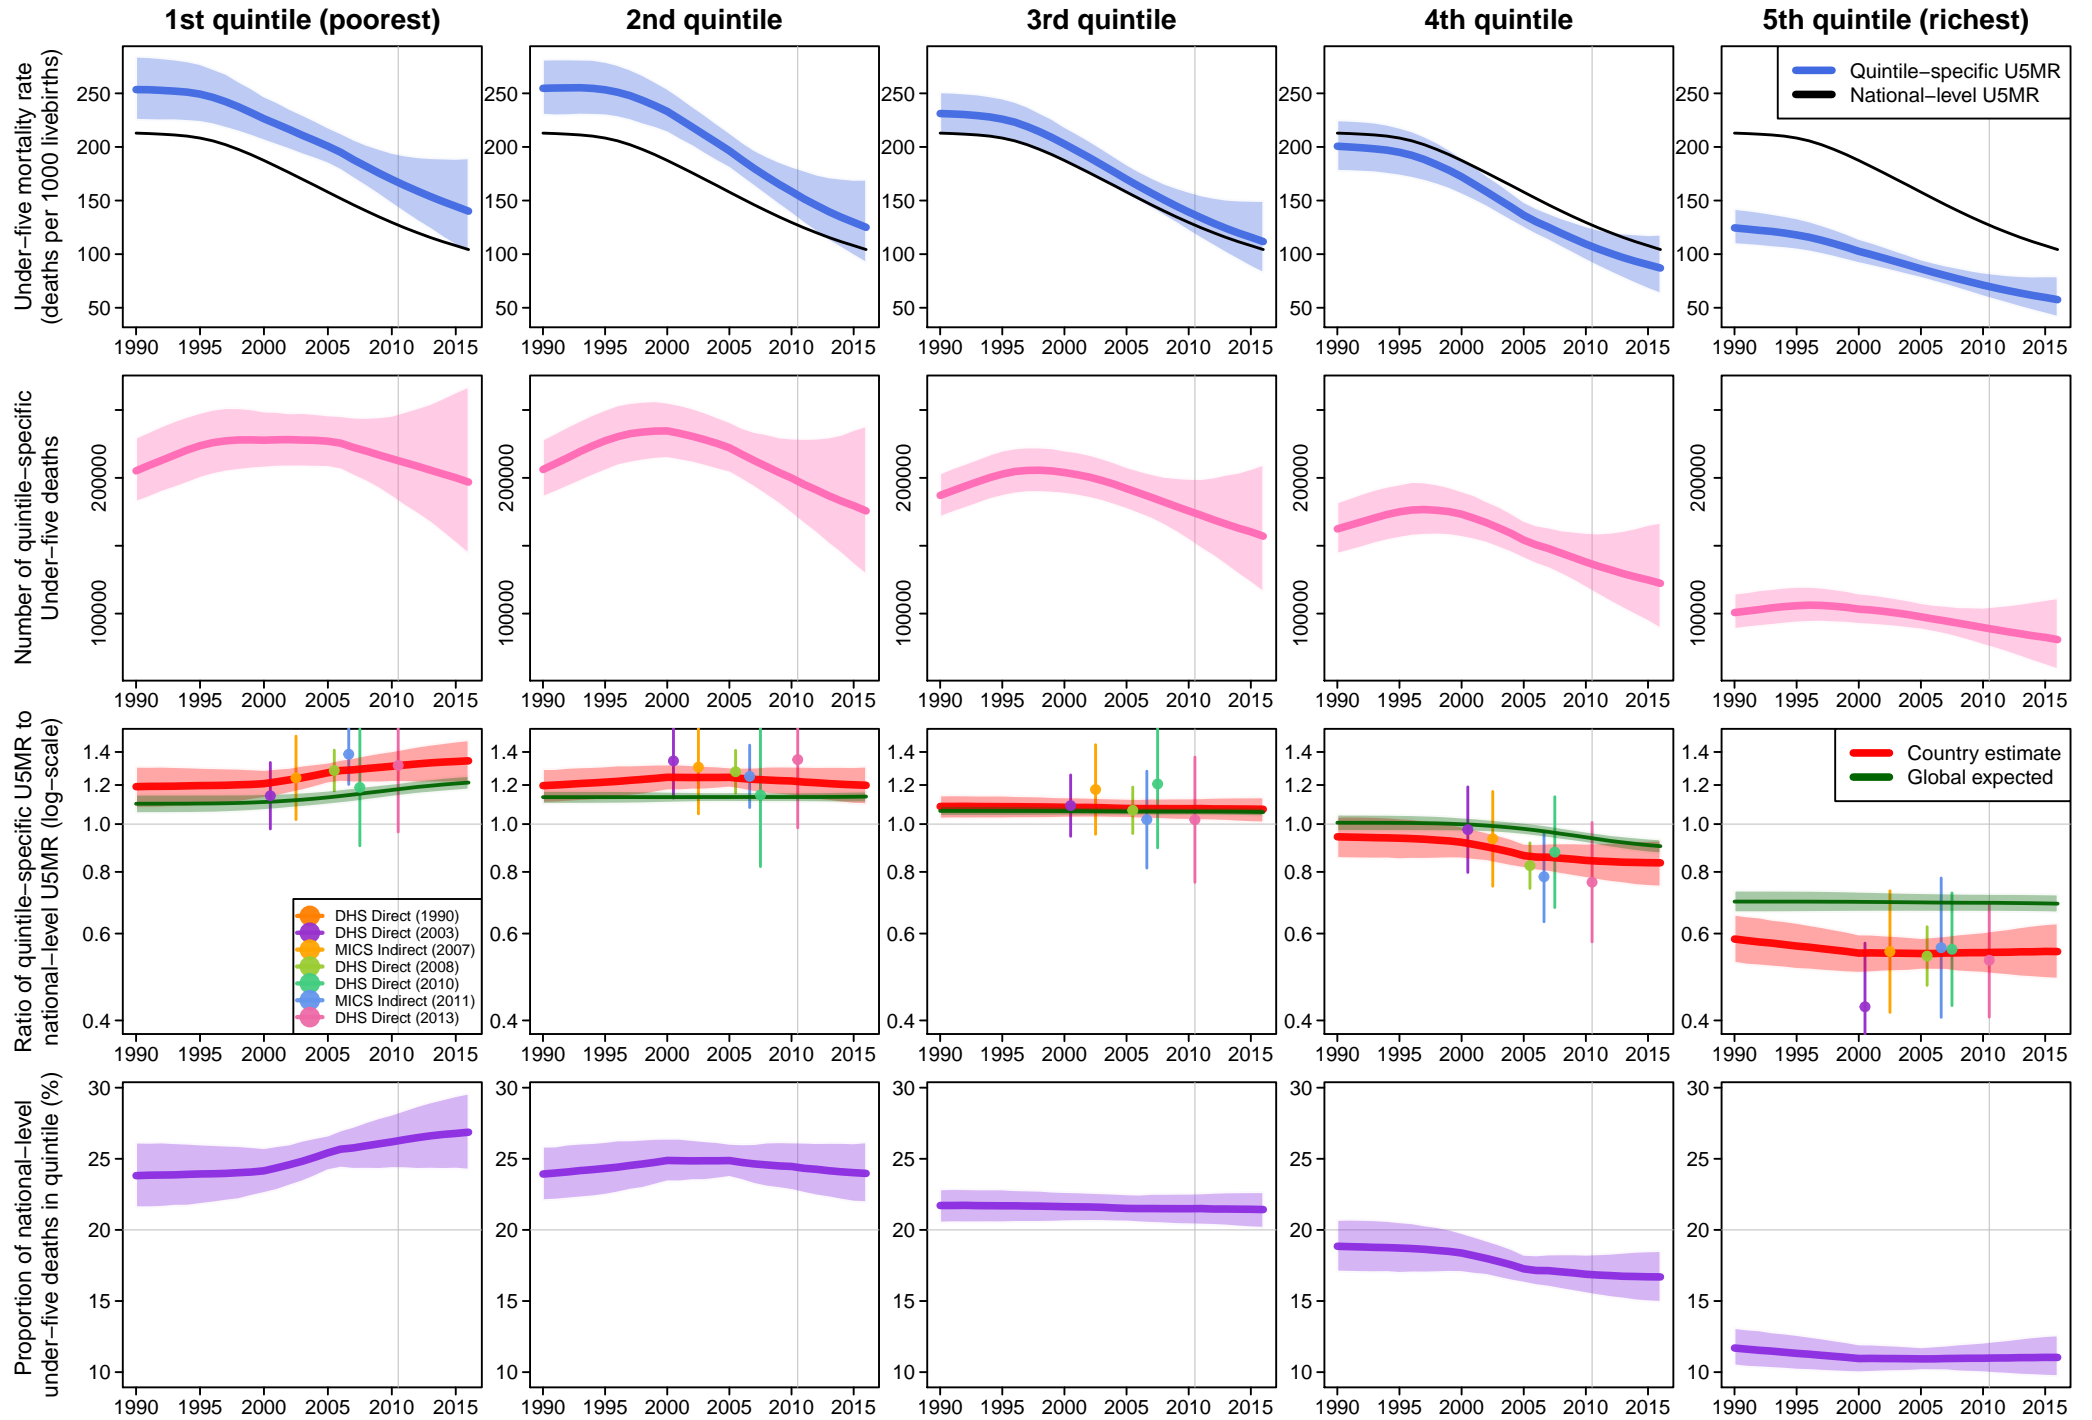

# Pakistan

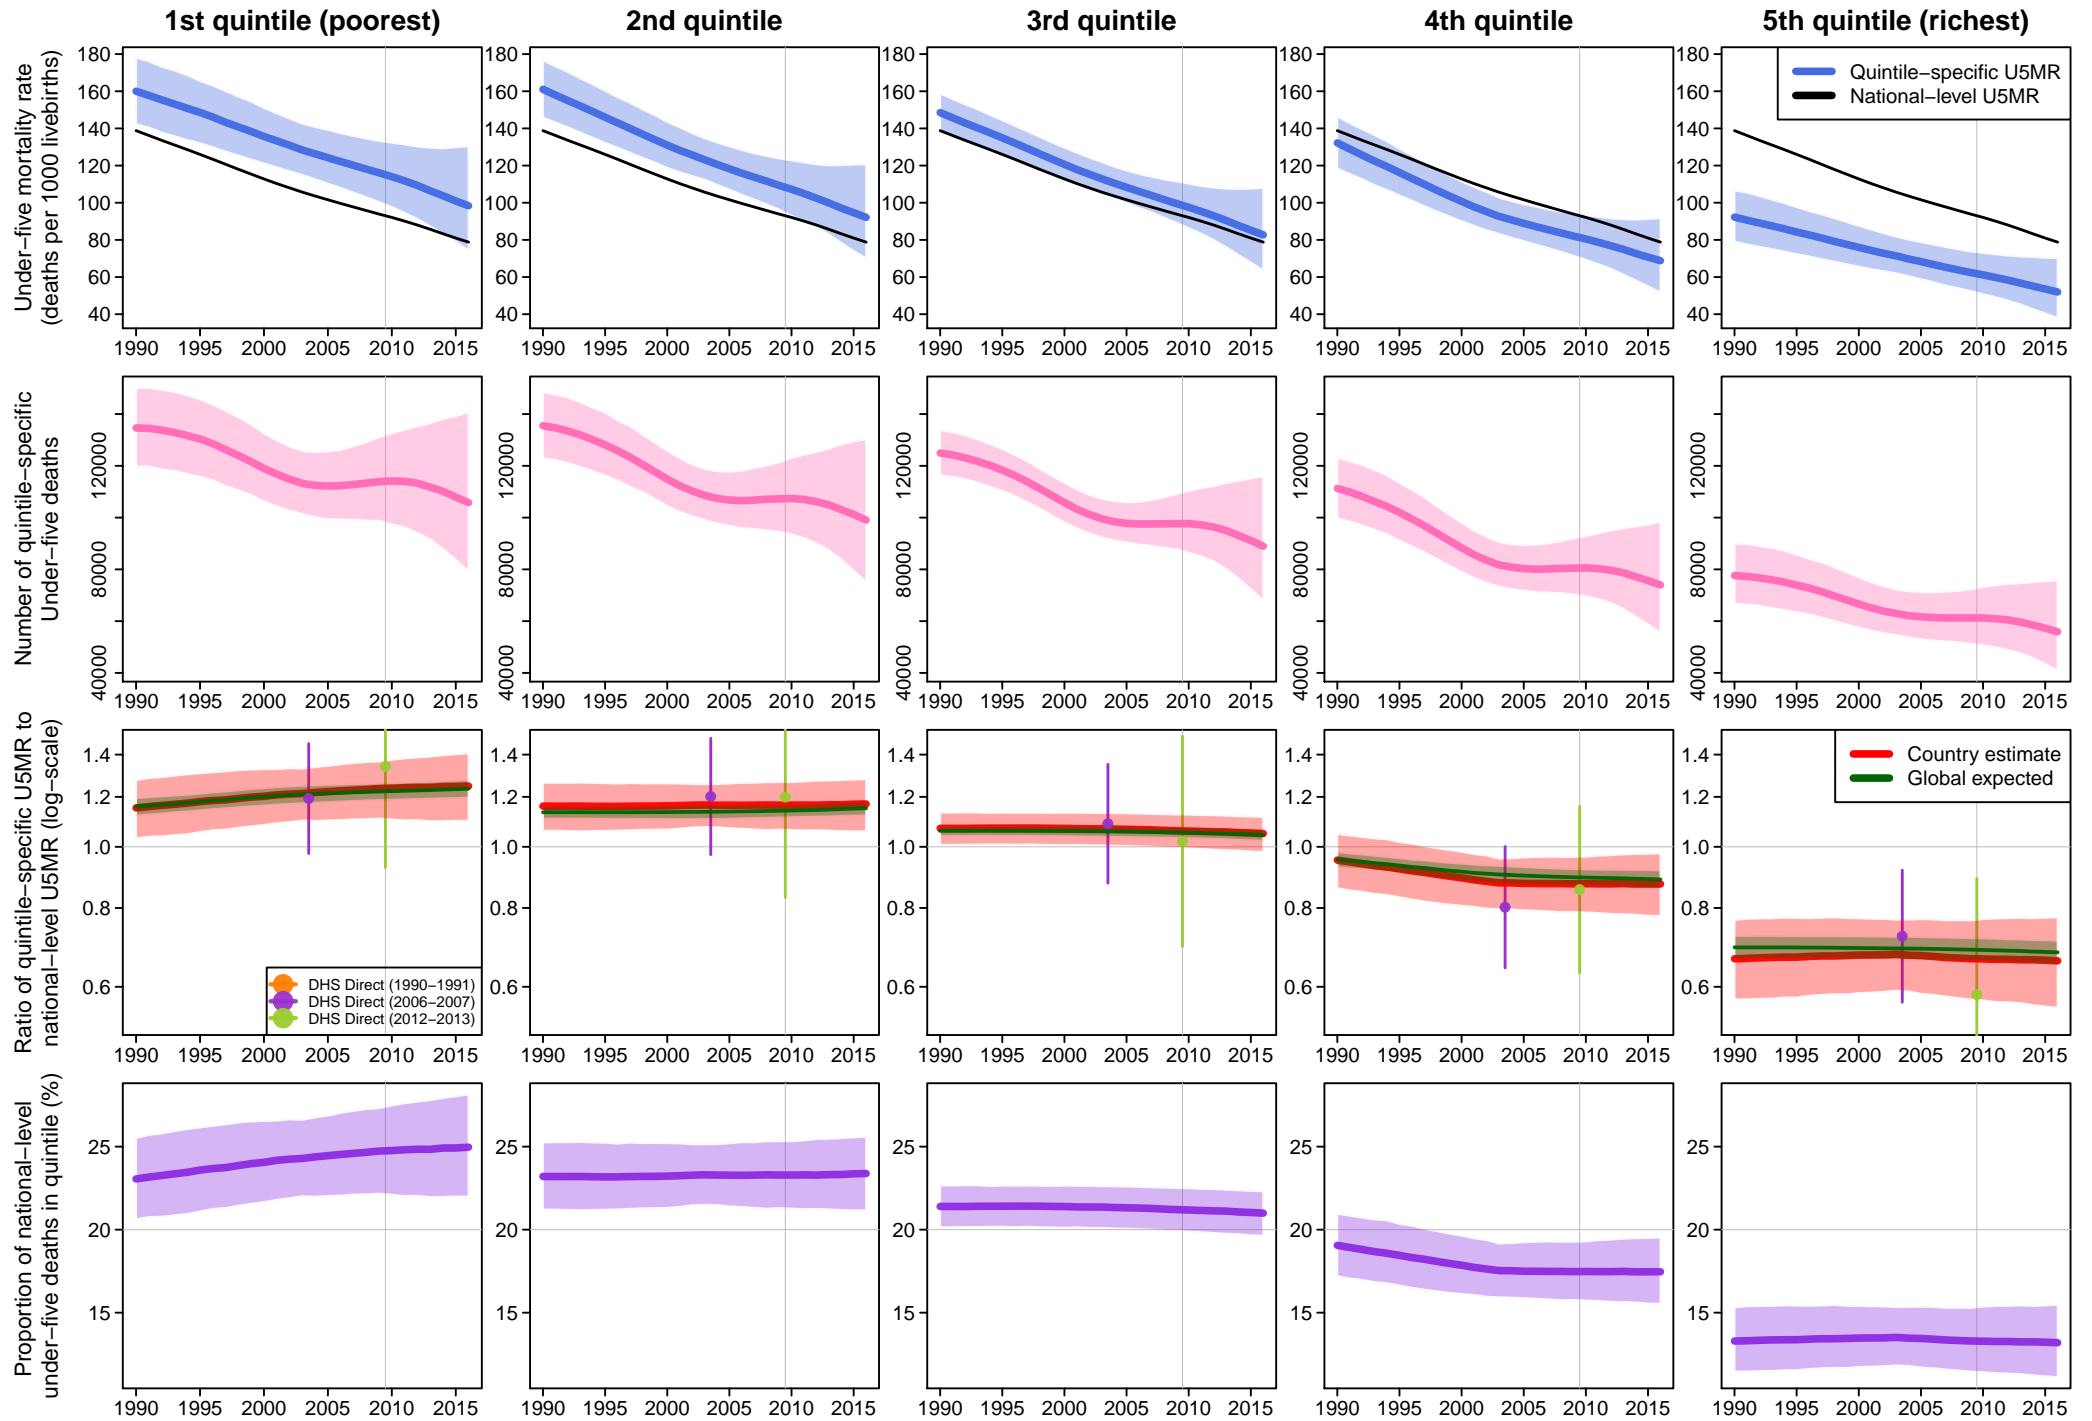

# Paraguay

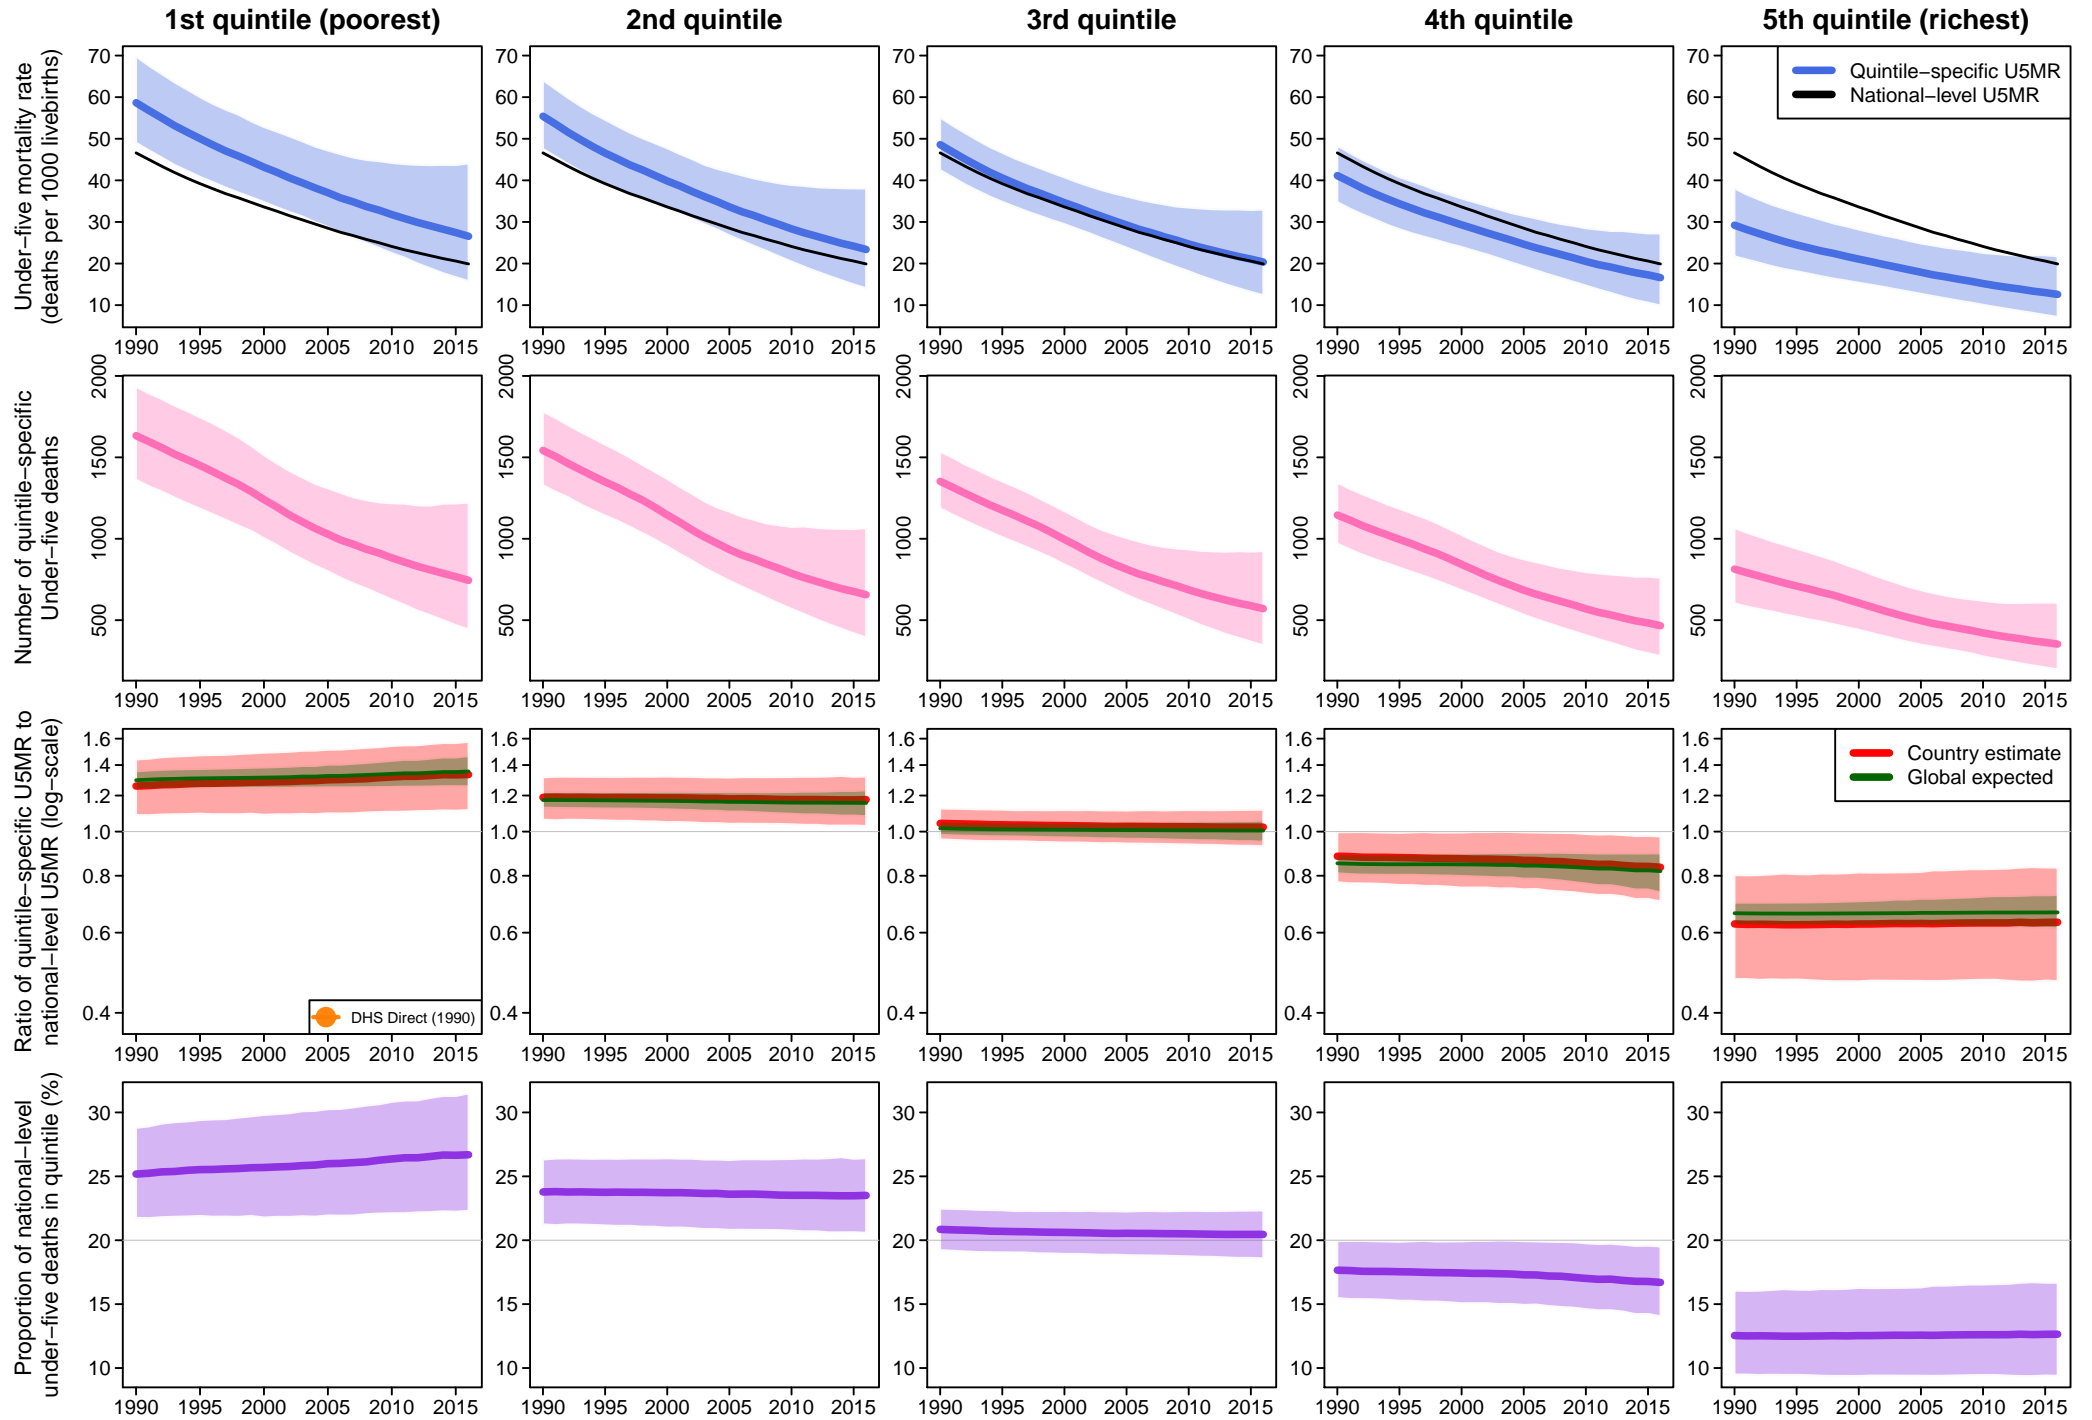

# Peru

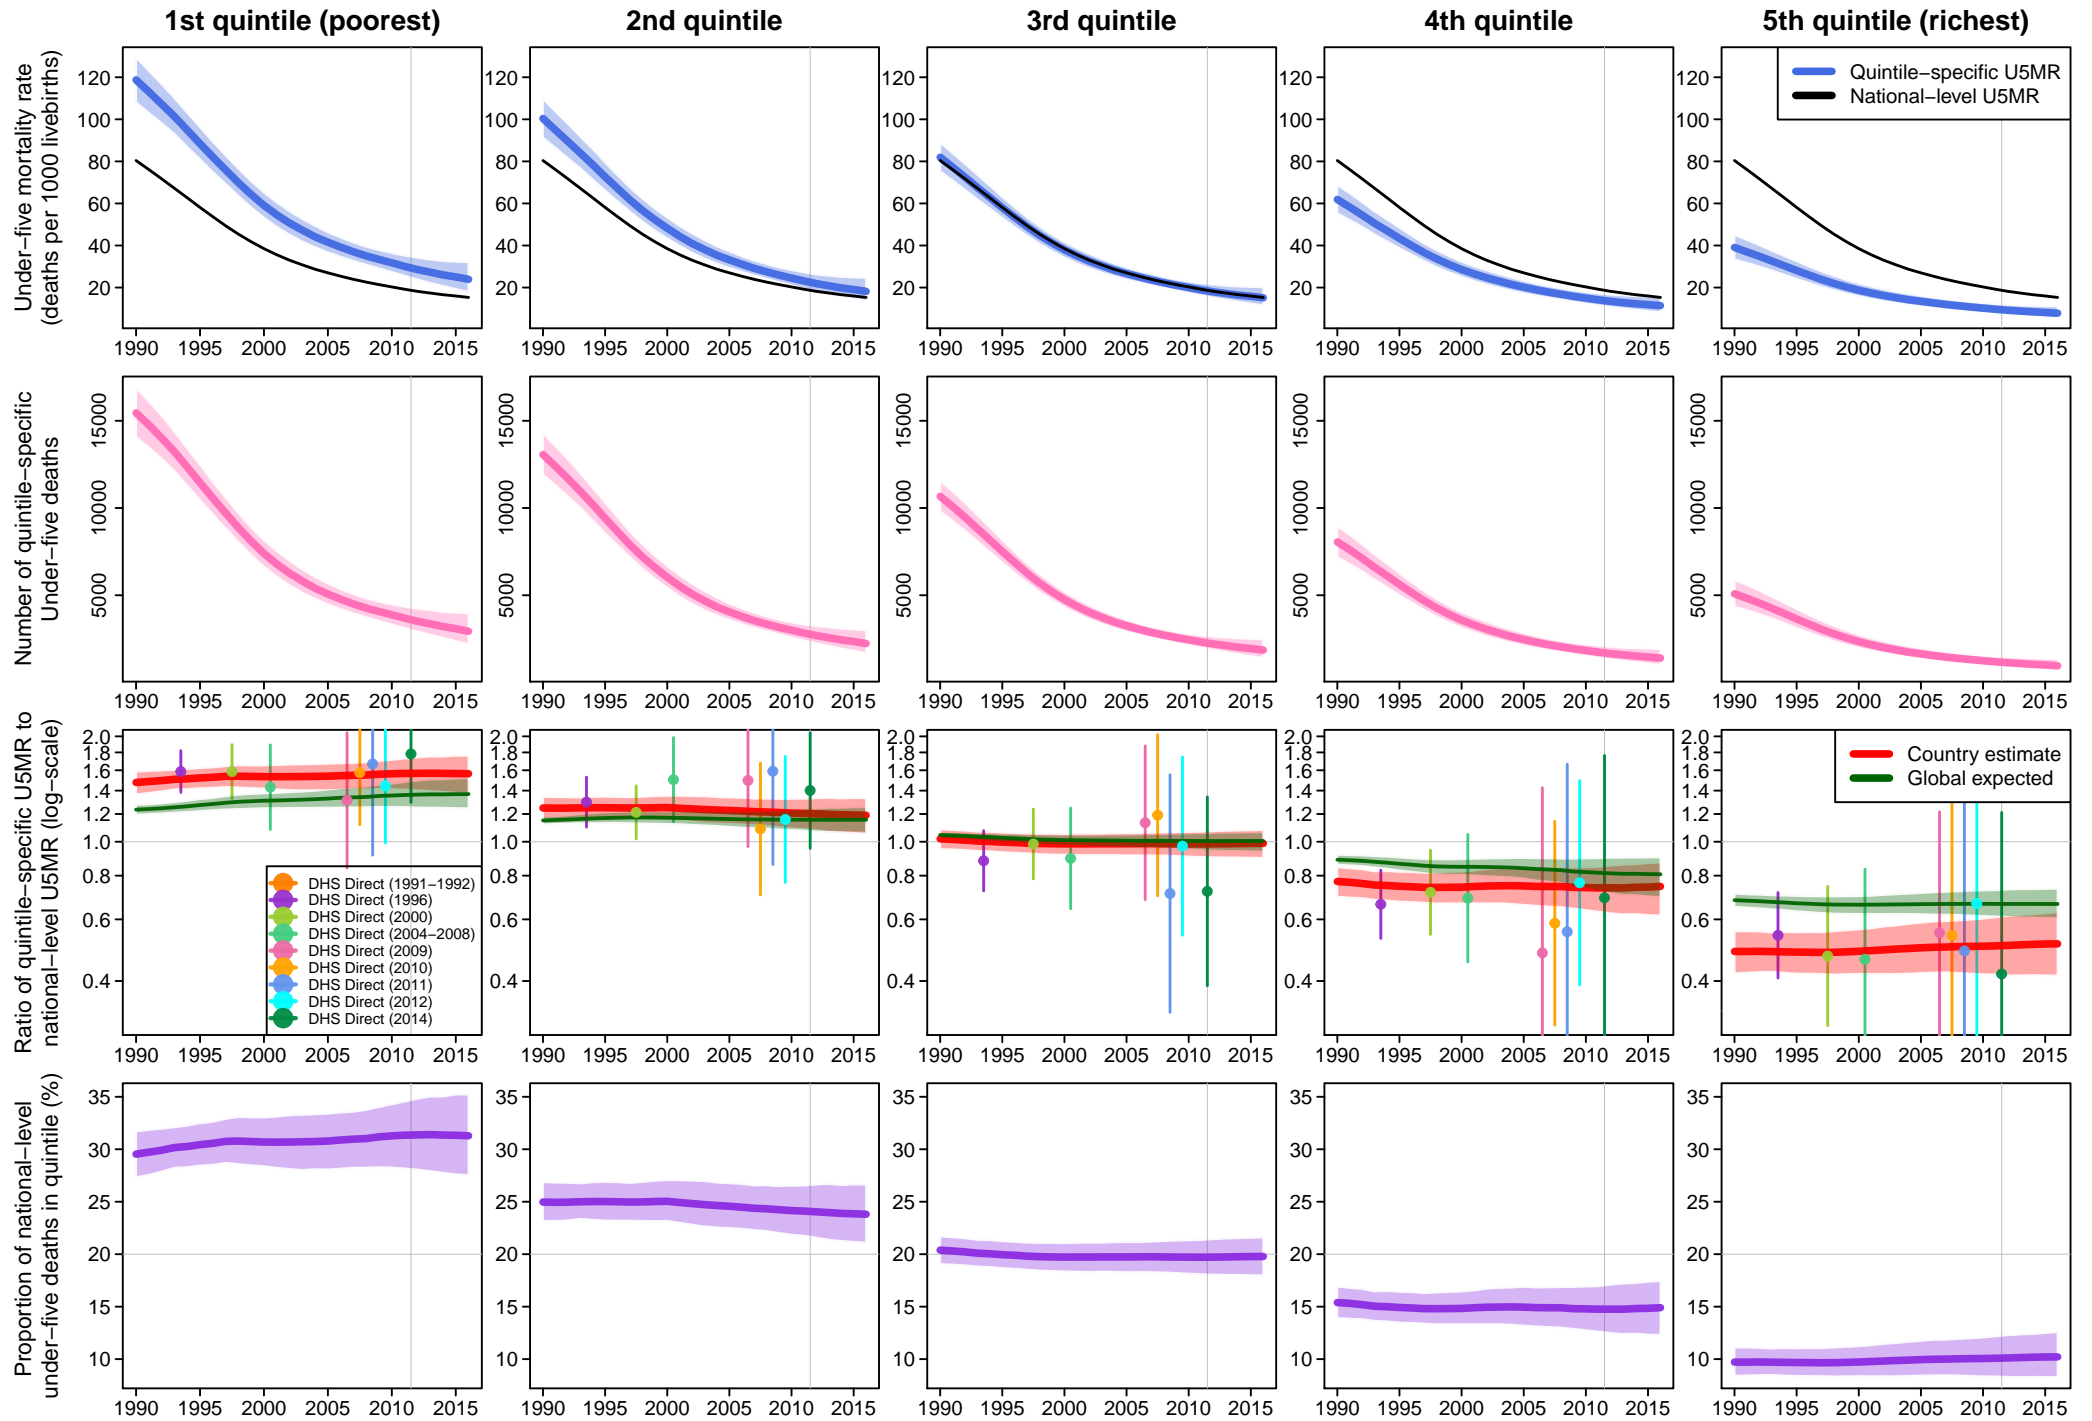

# Philippines

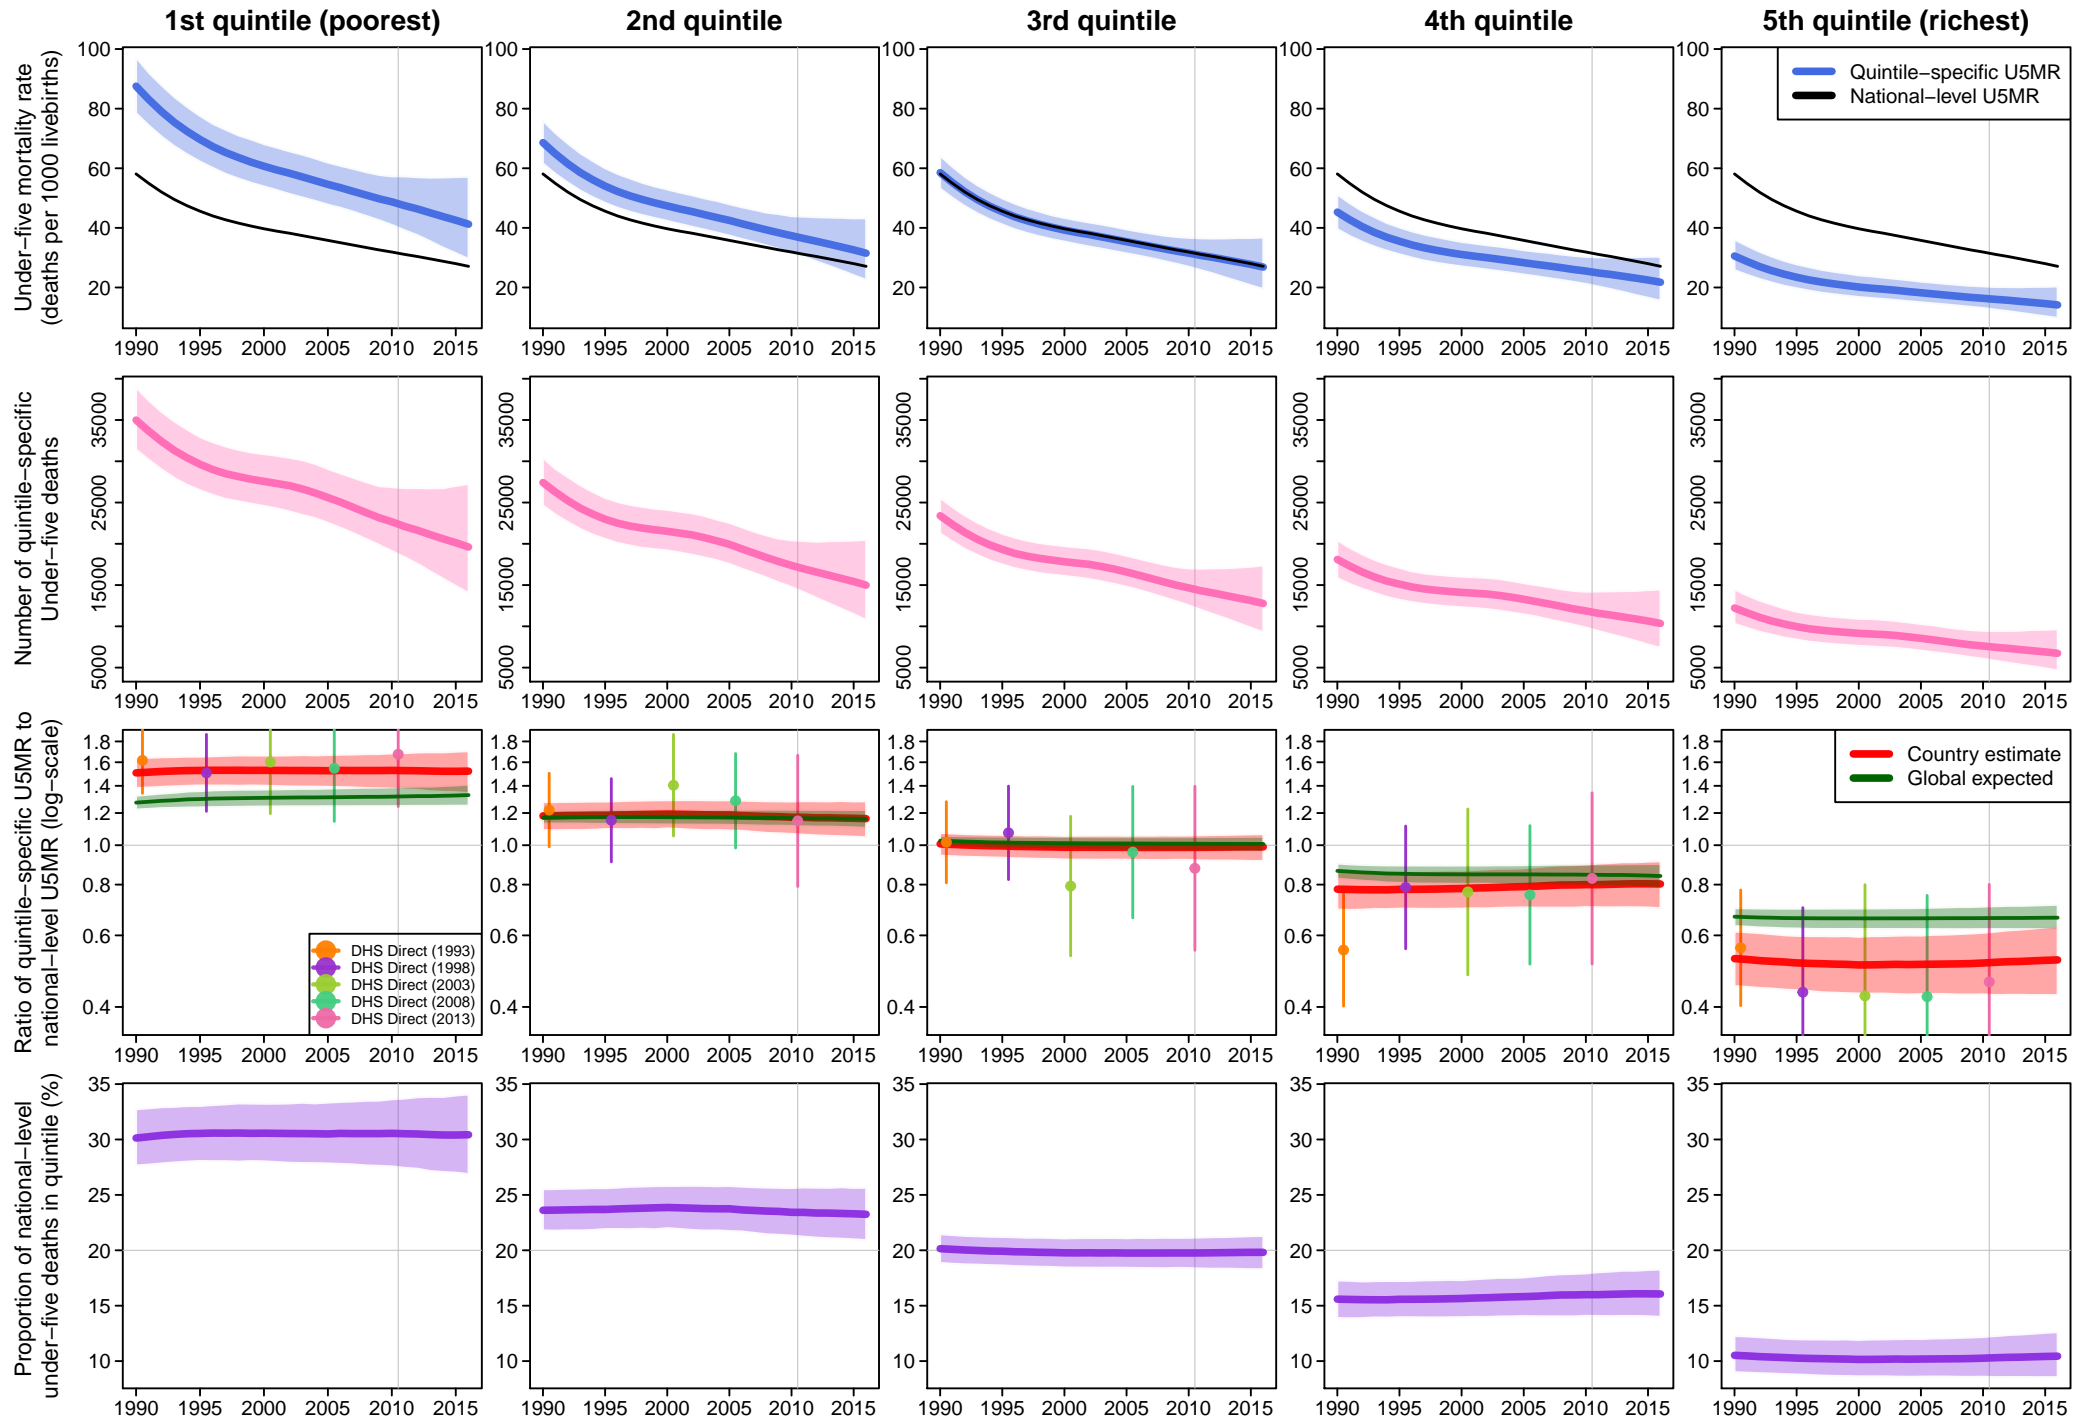



# Republic of Moldova

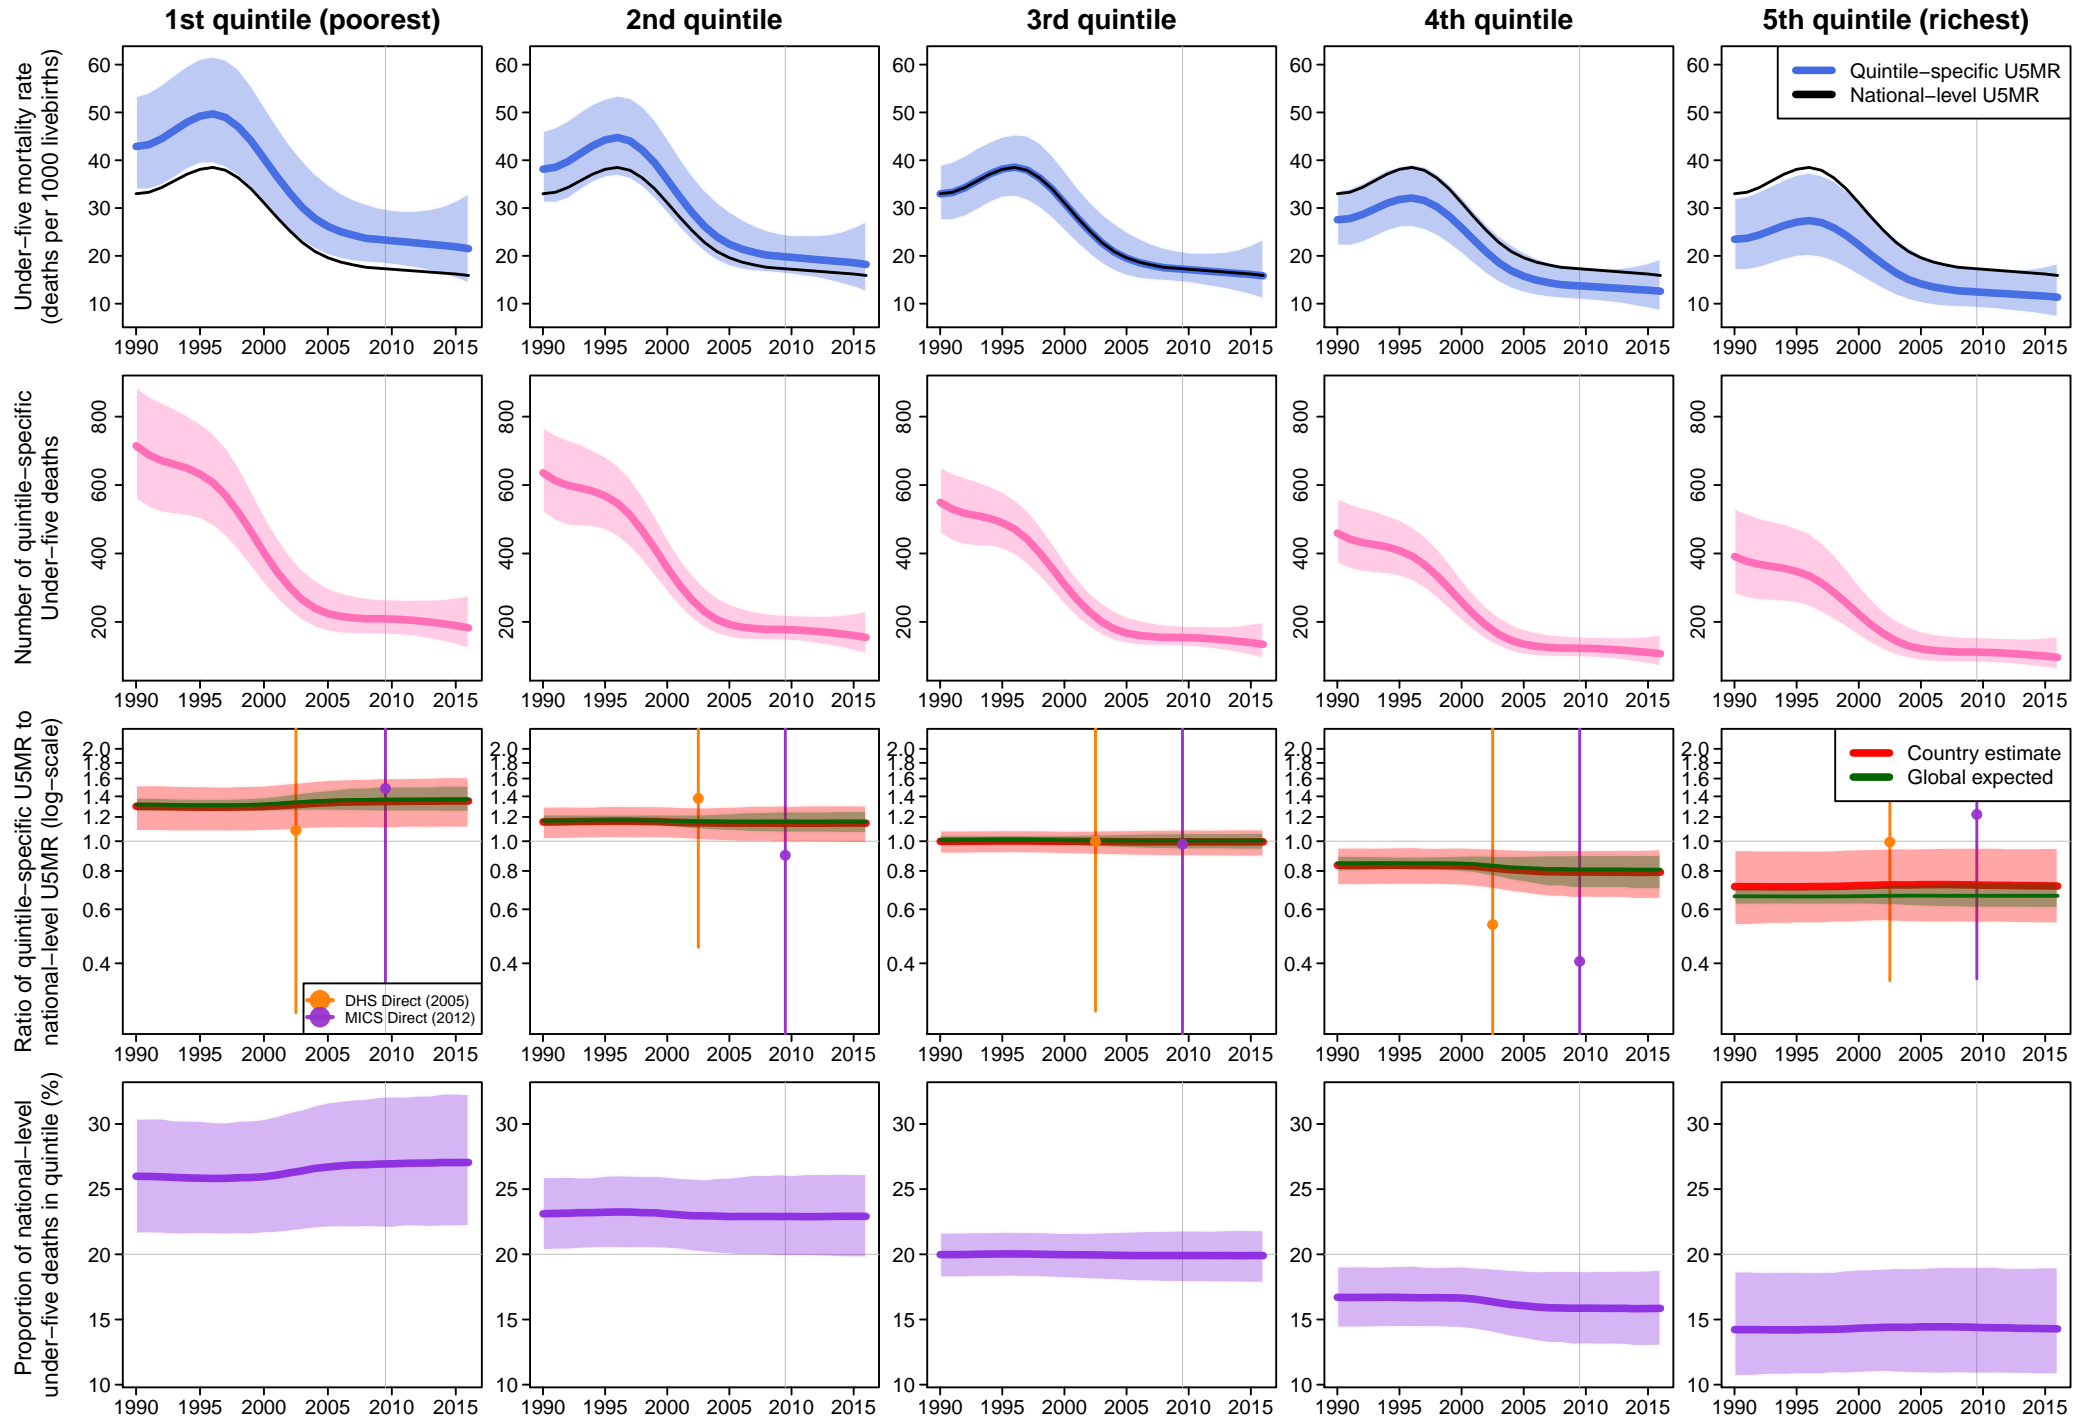

# Rwanda

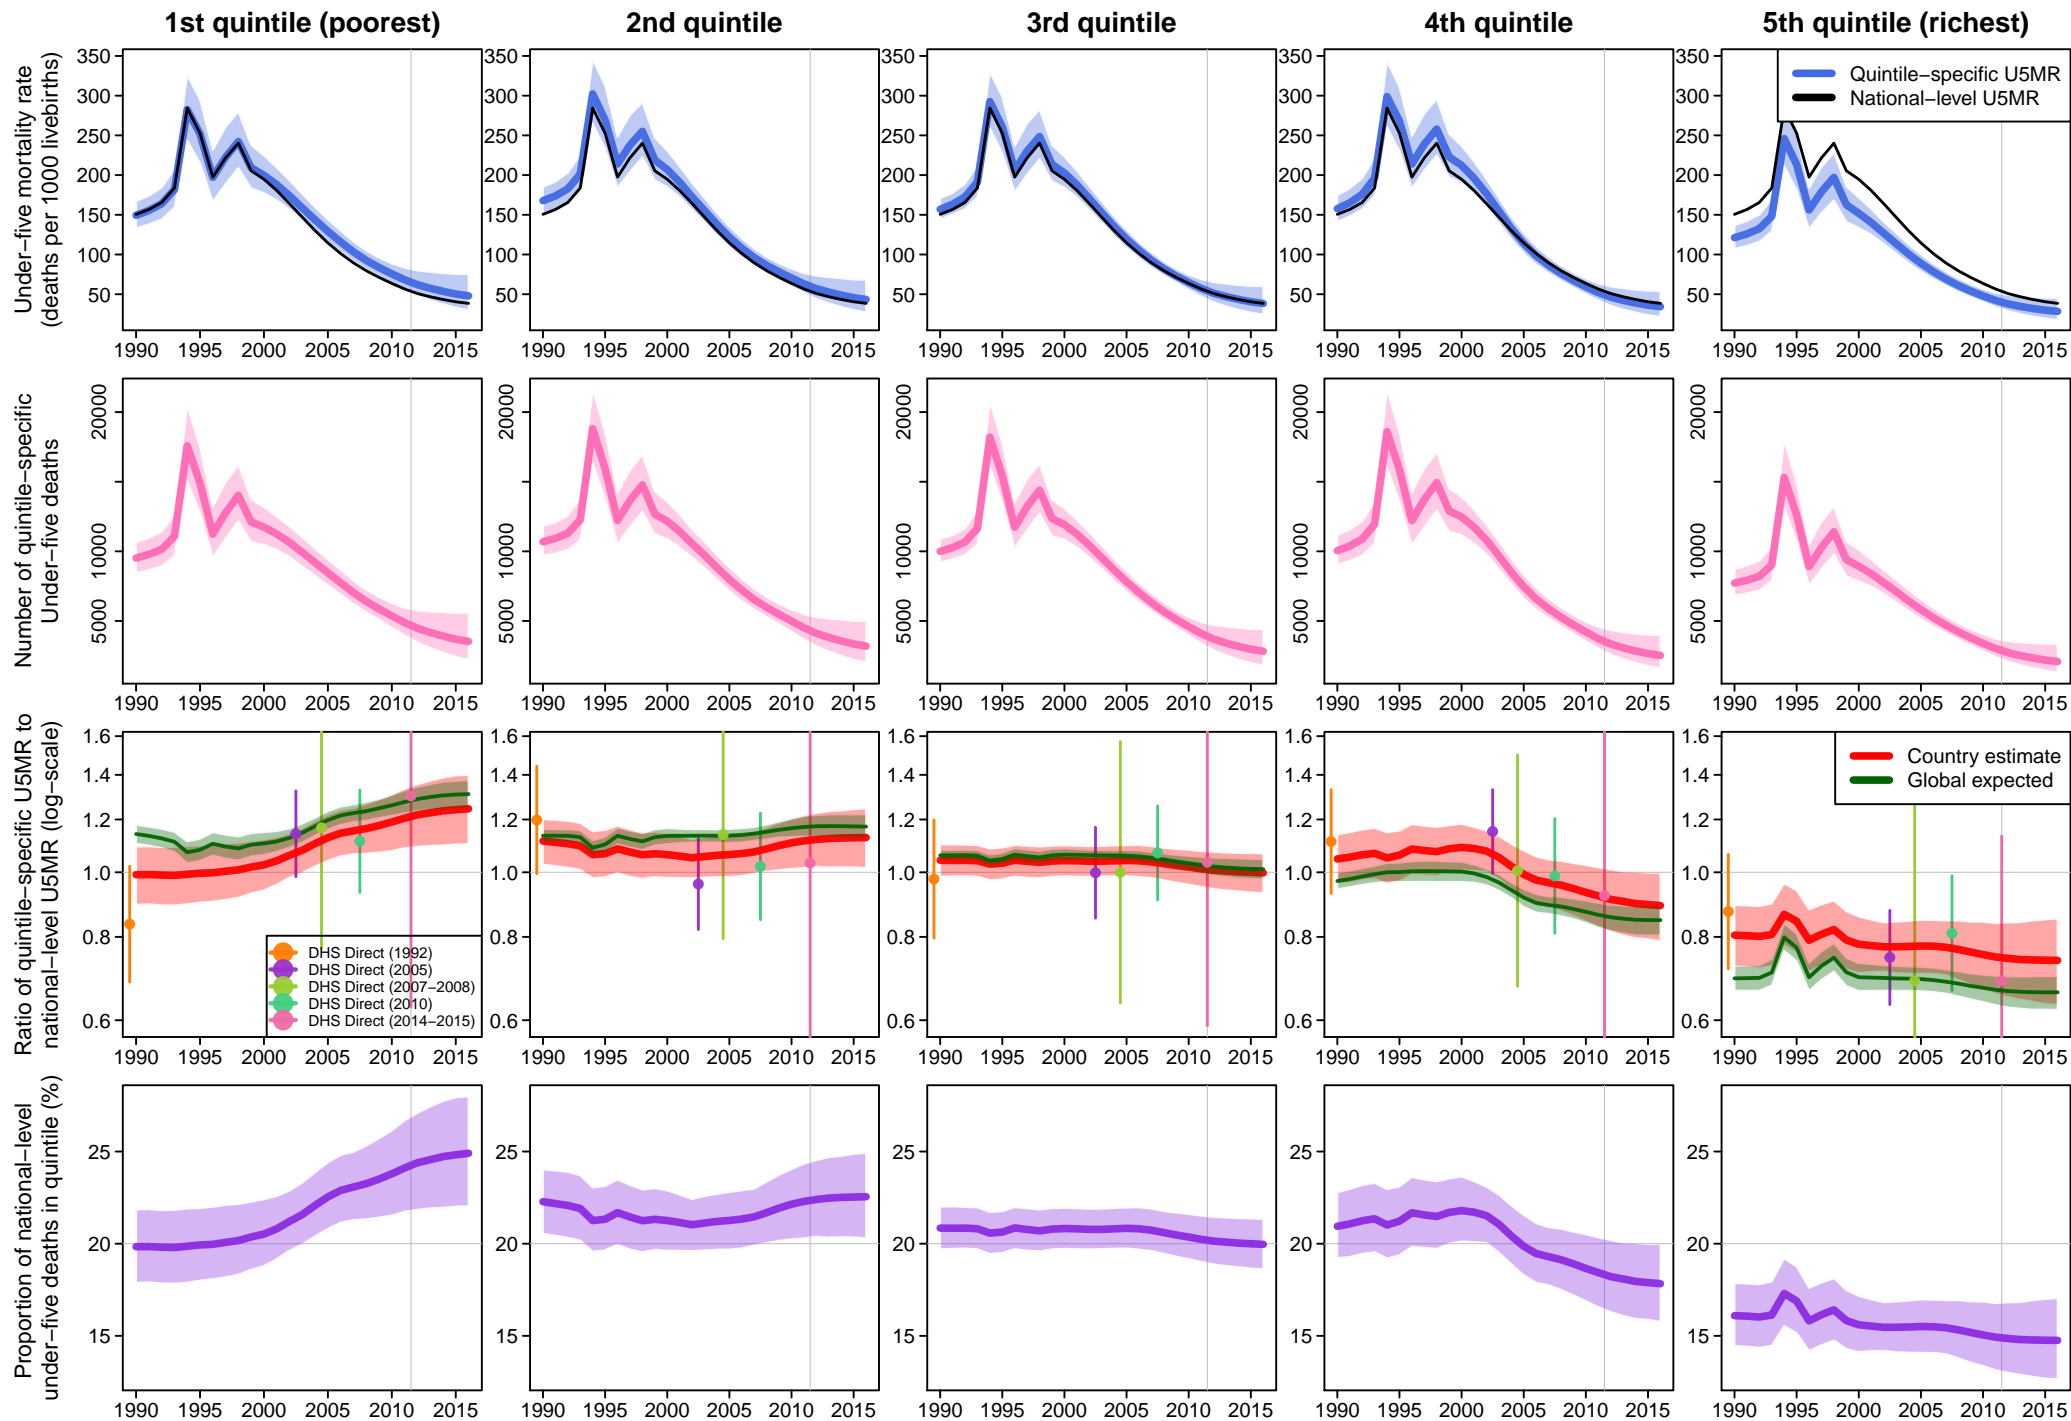

# Sao Tome and Principe

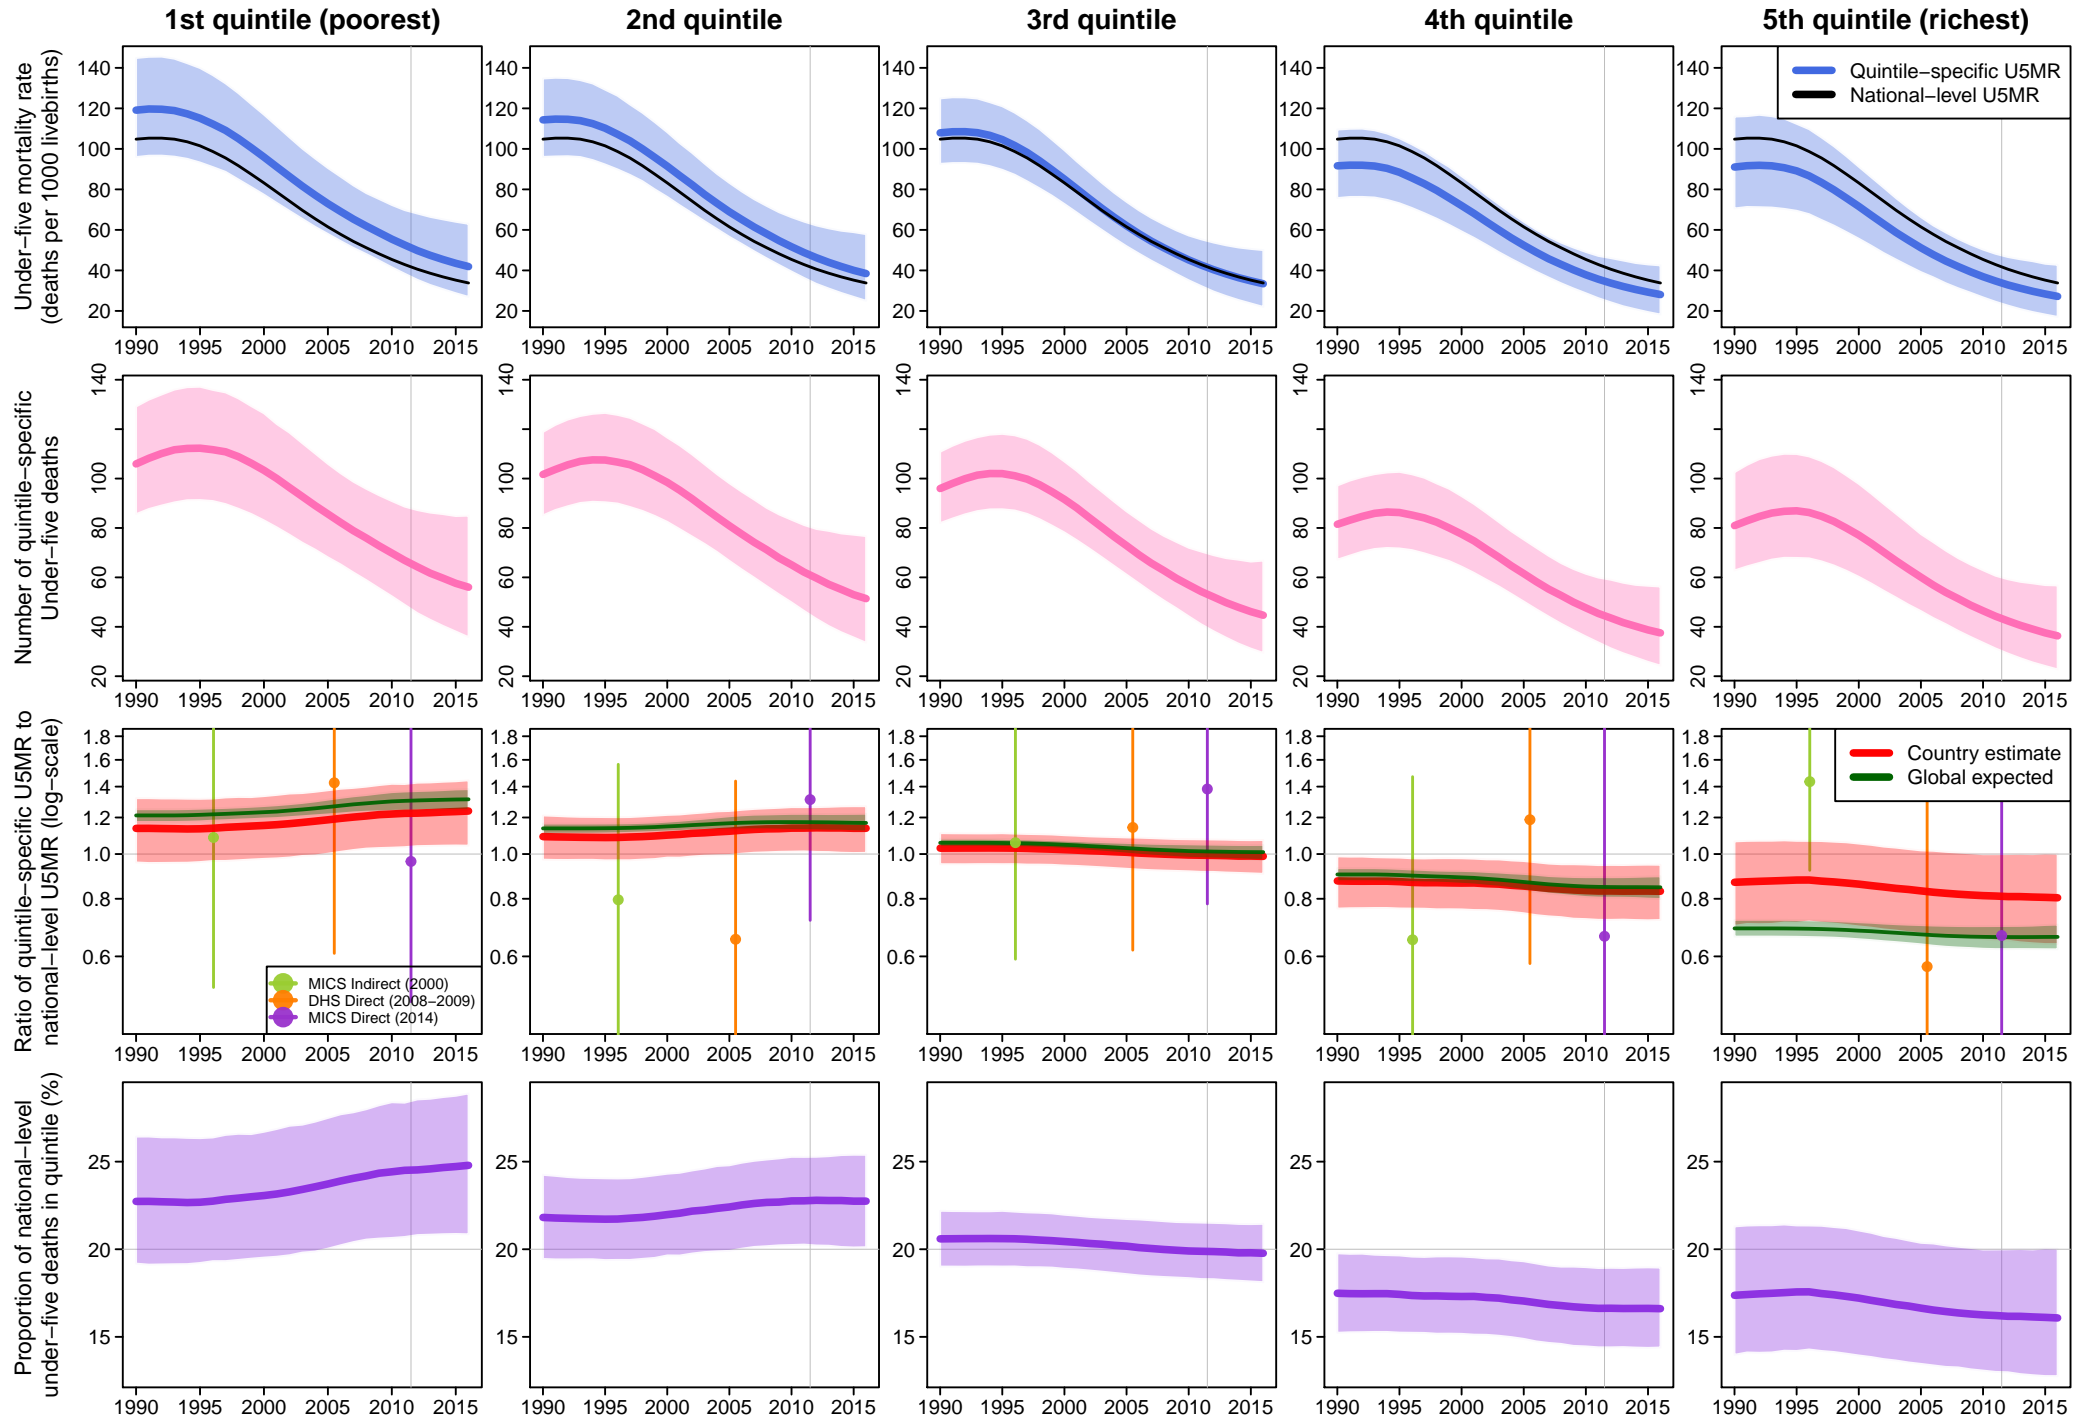

# Senegal

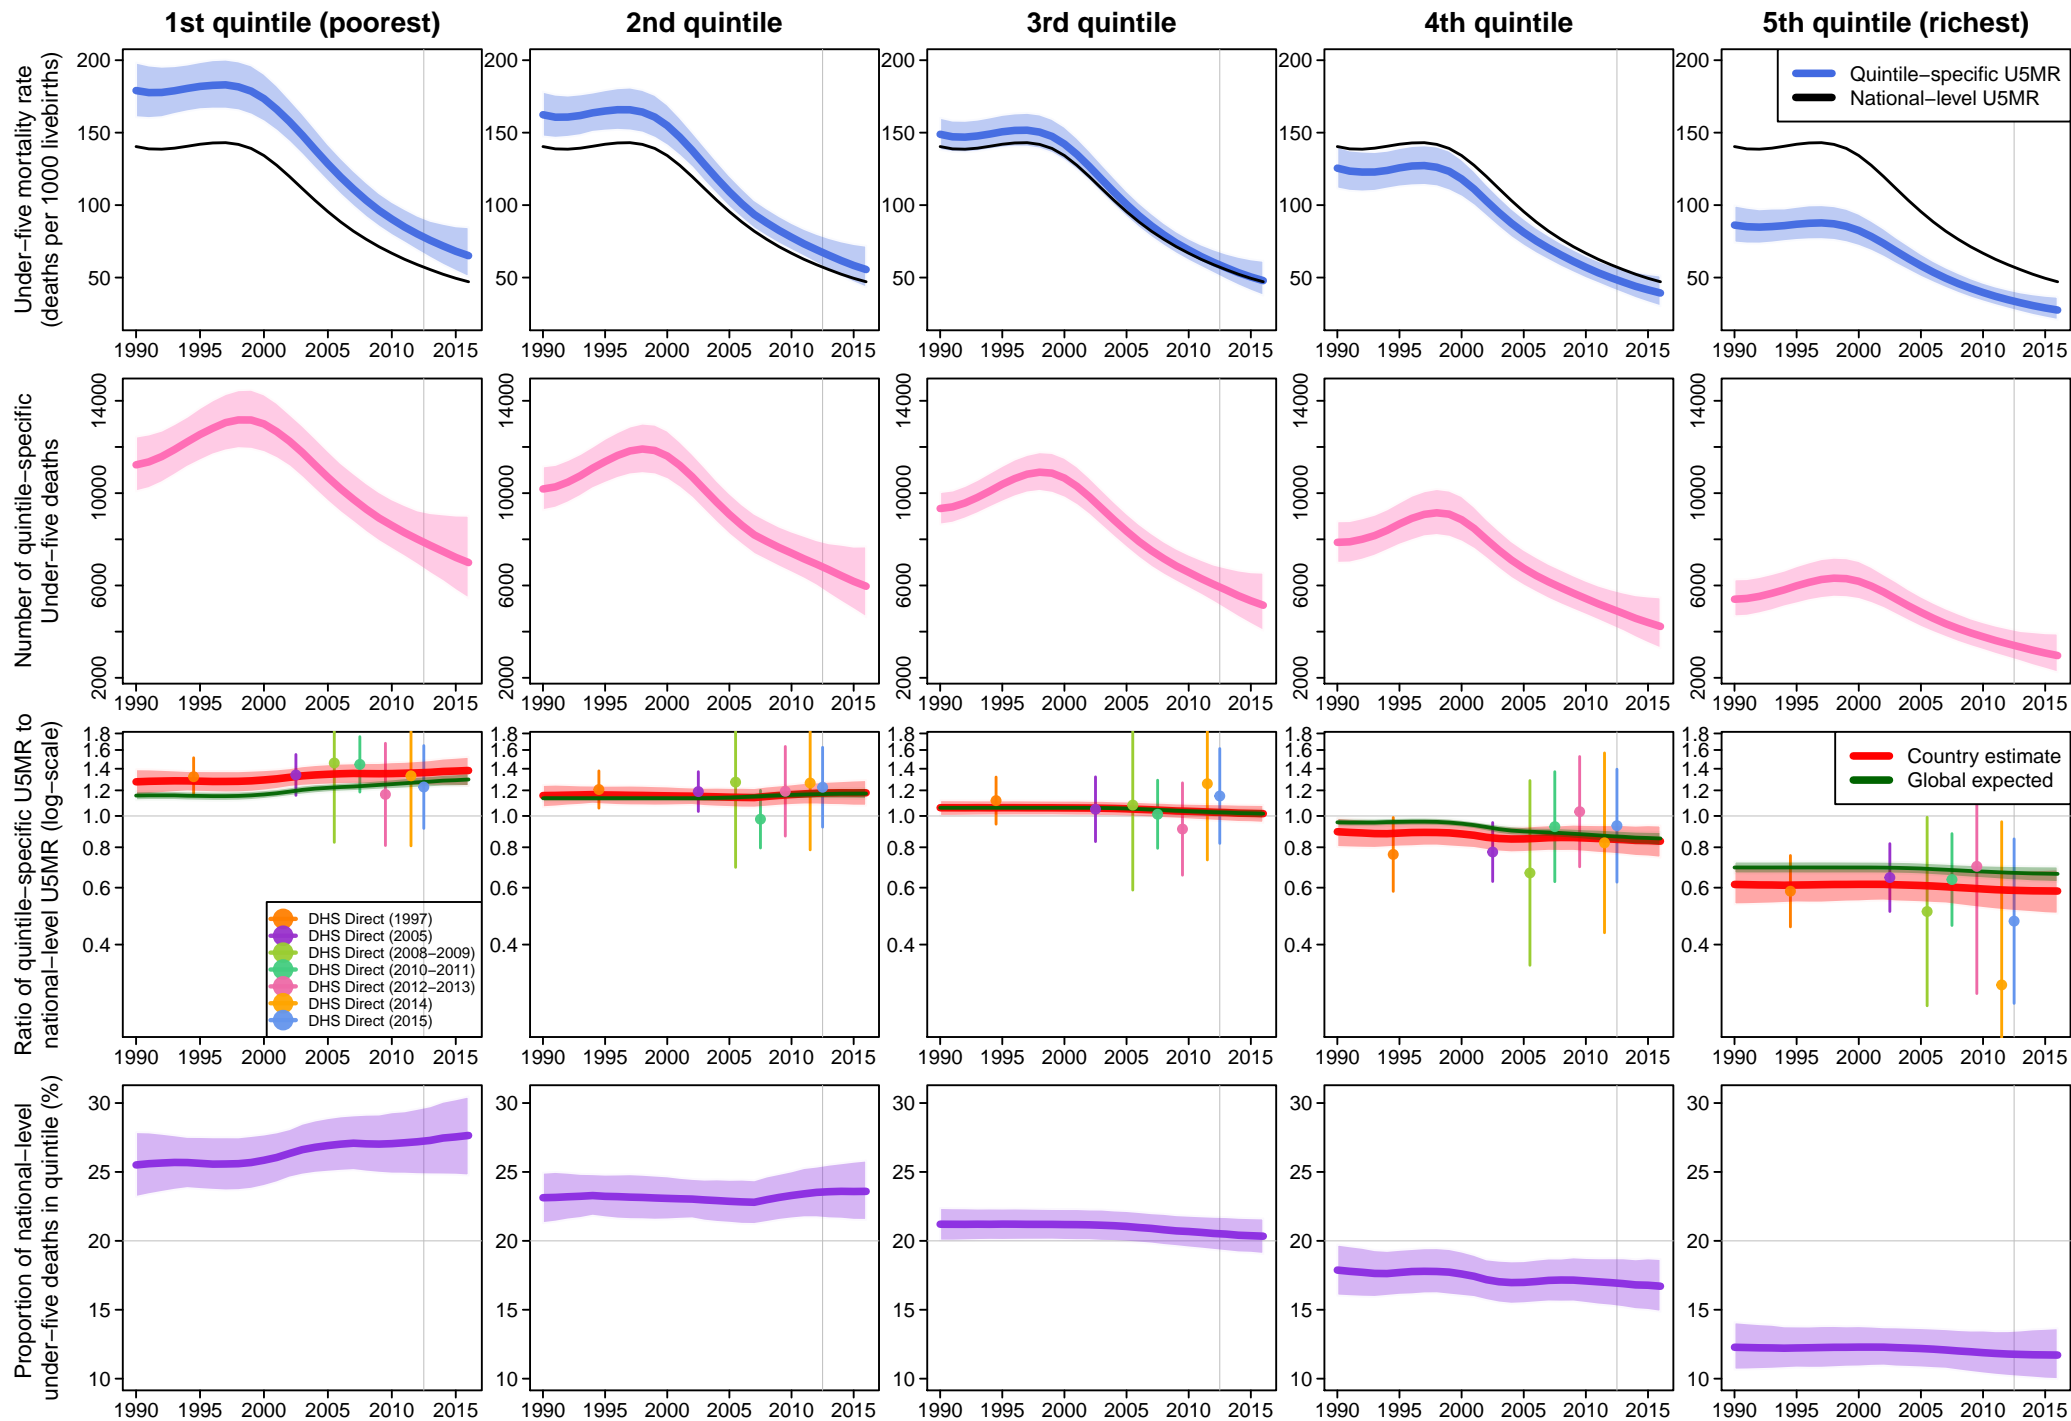

# Serbia

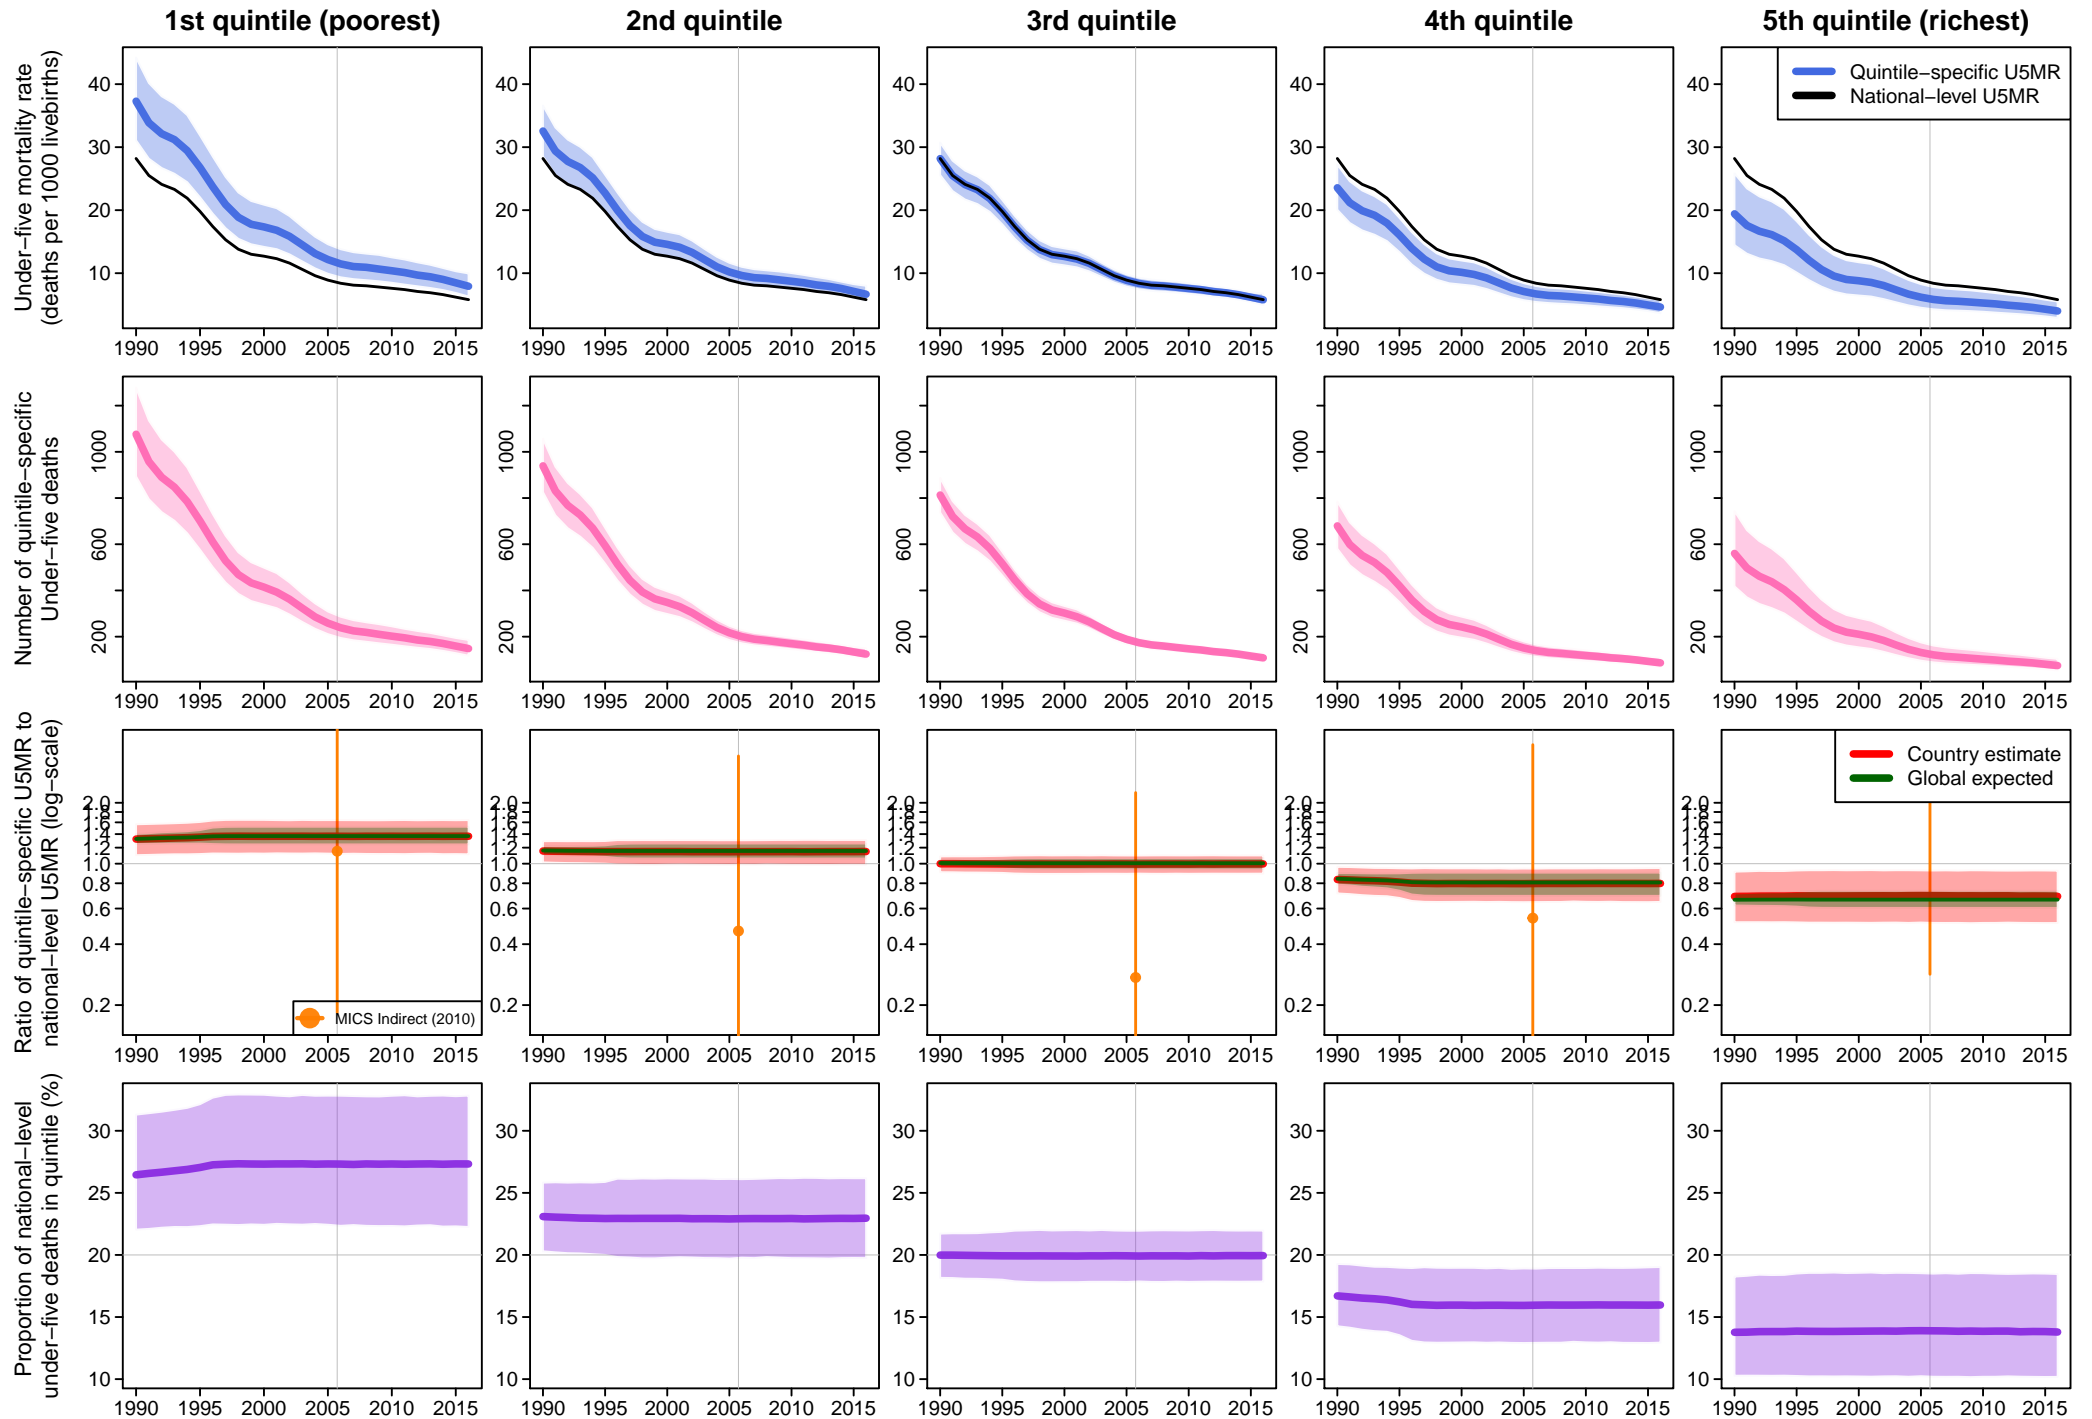

# Sierra Leone

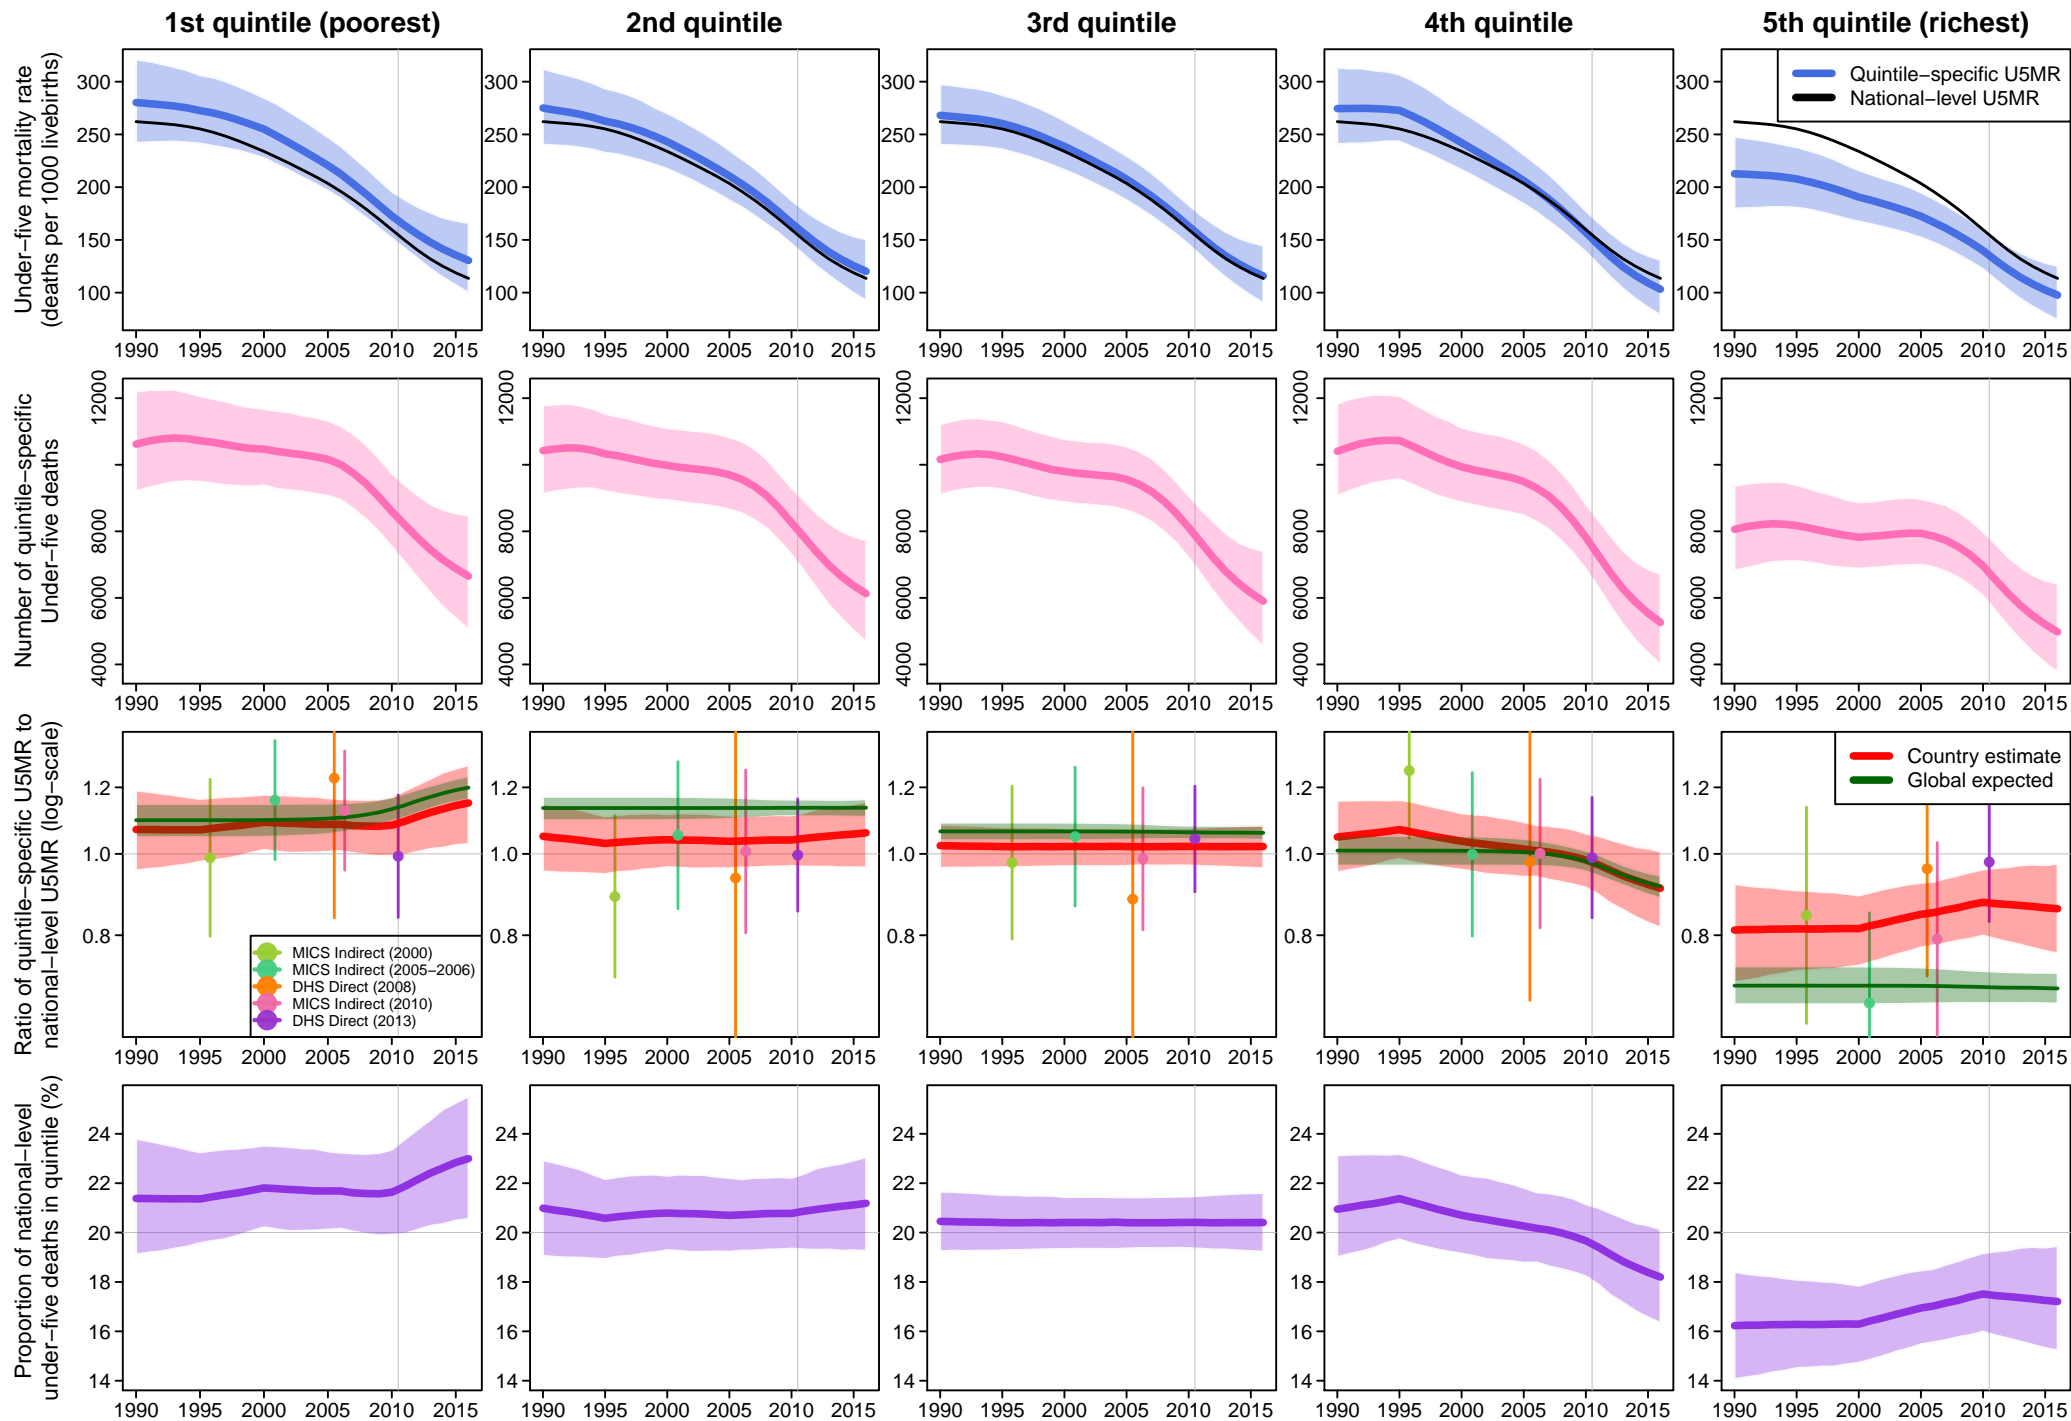

# Somalia

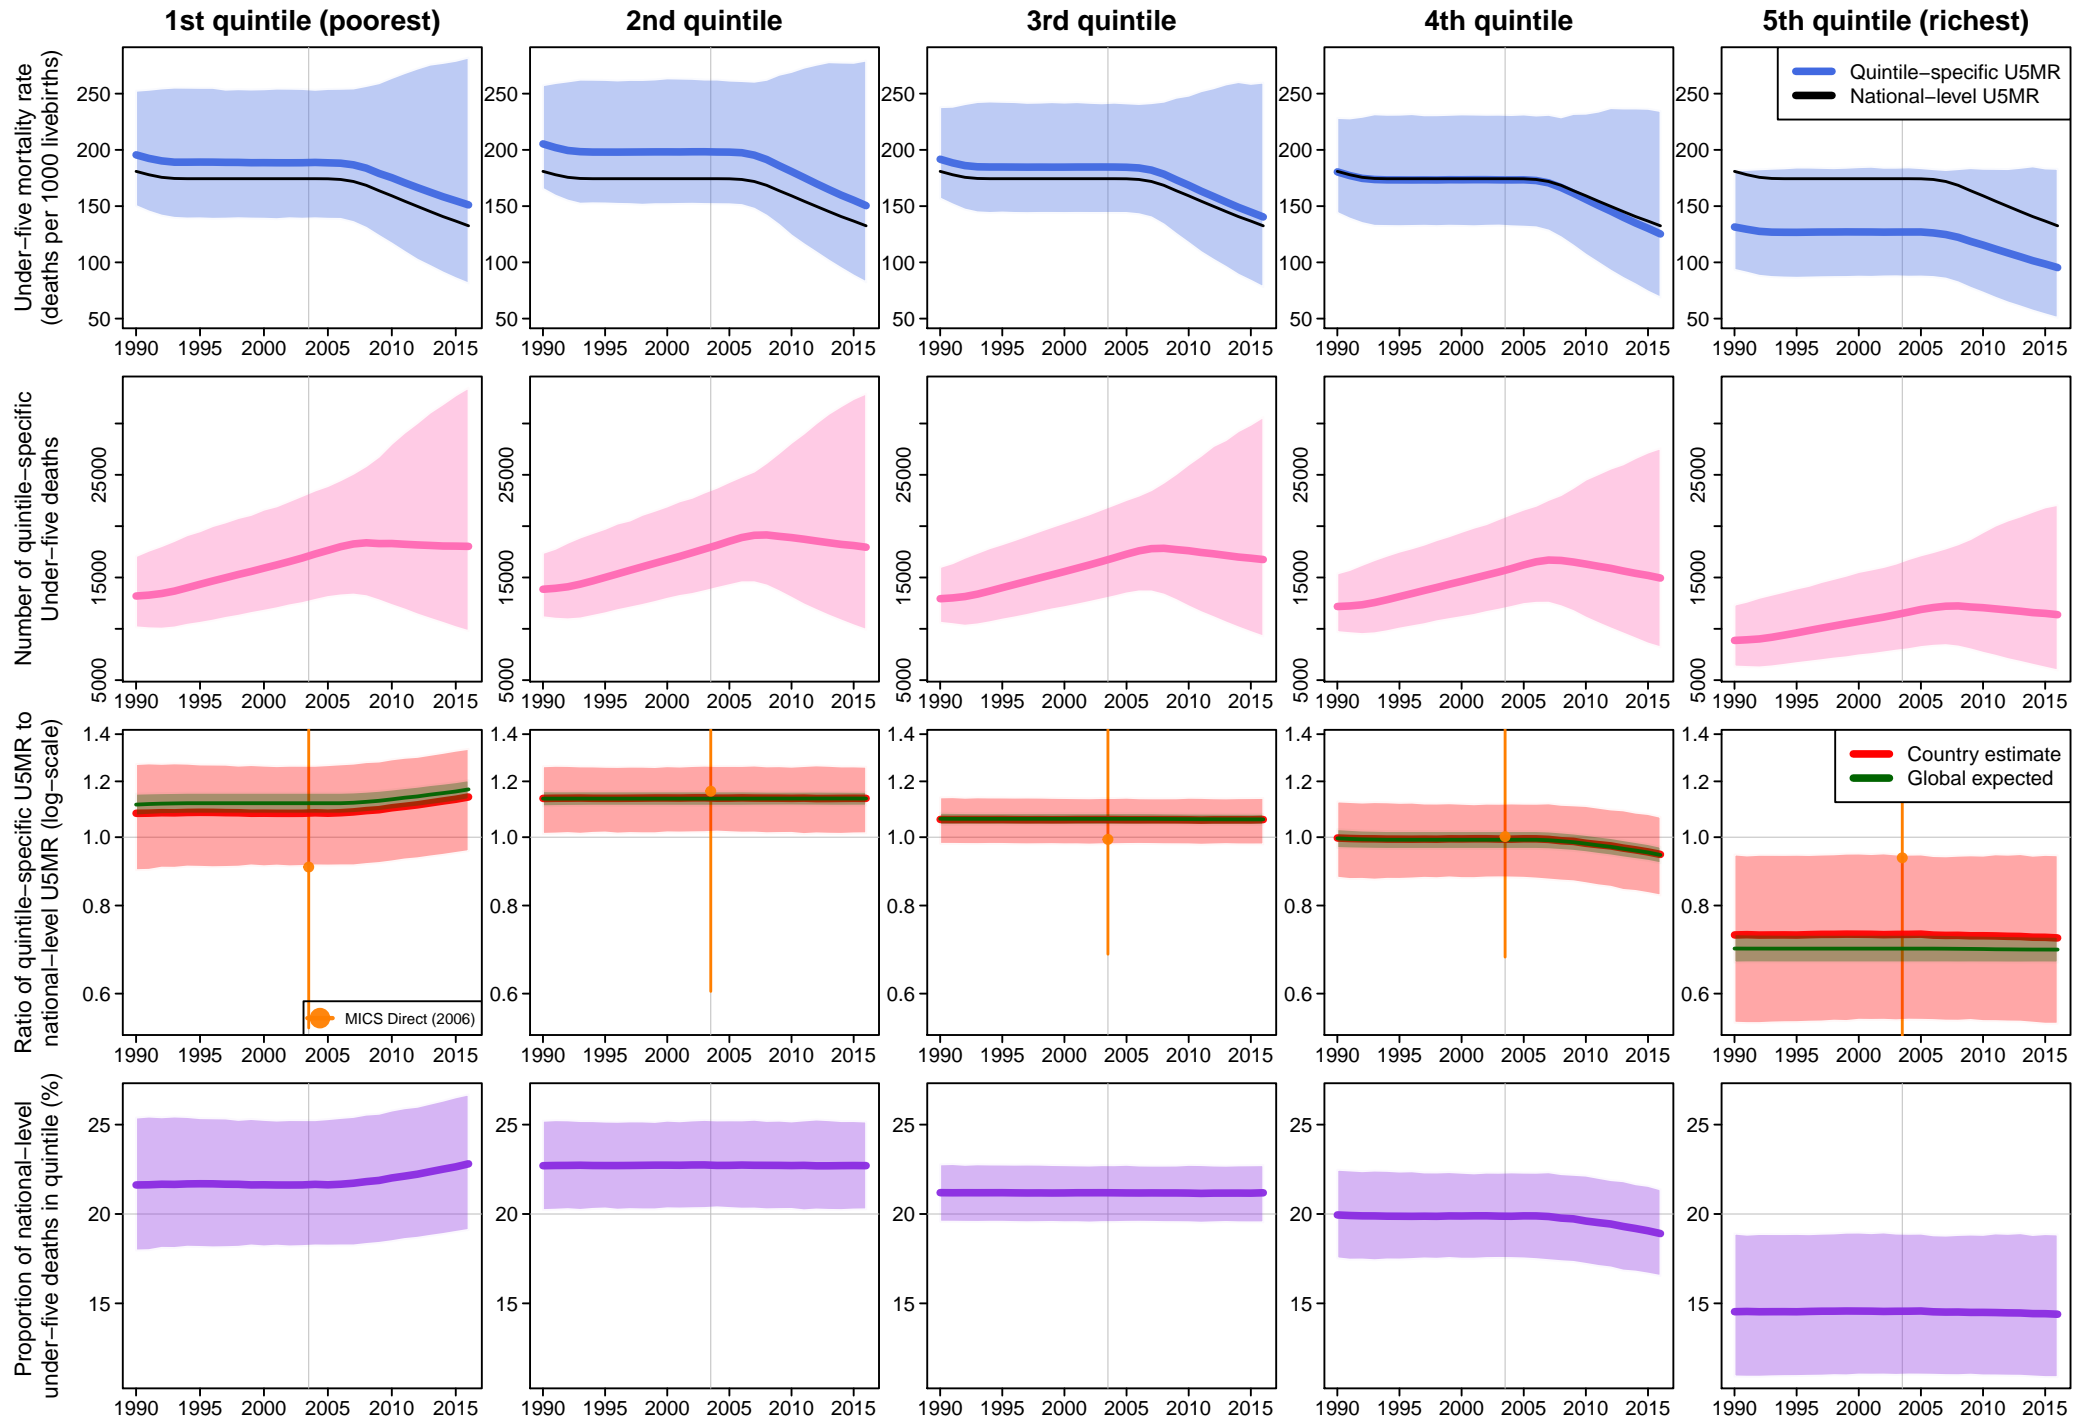

# South Africa

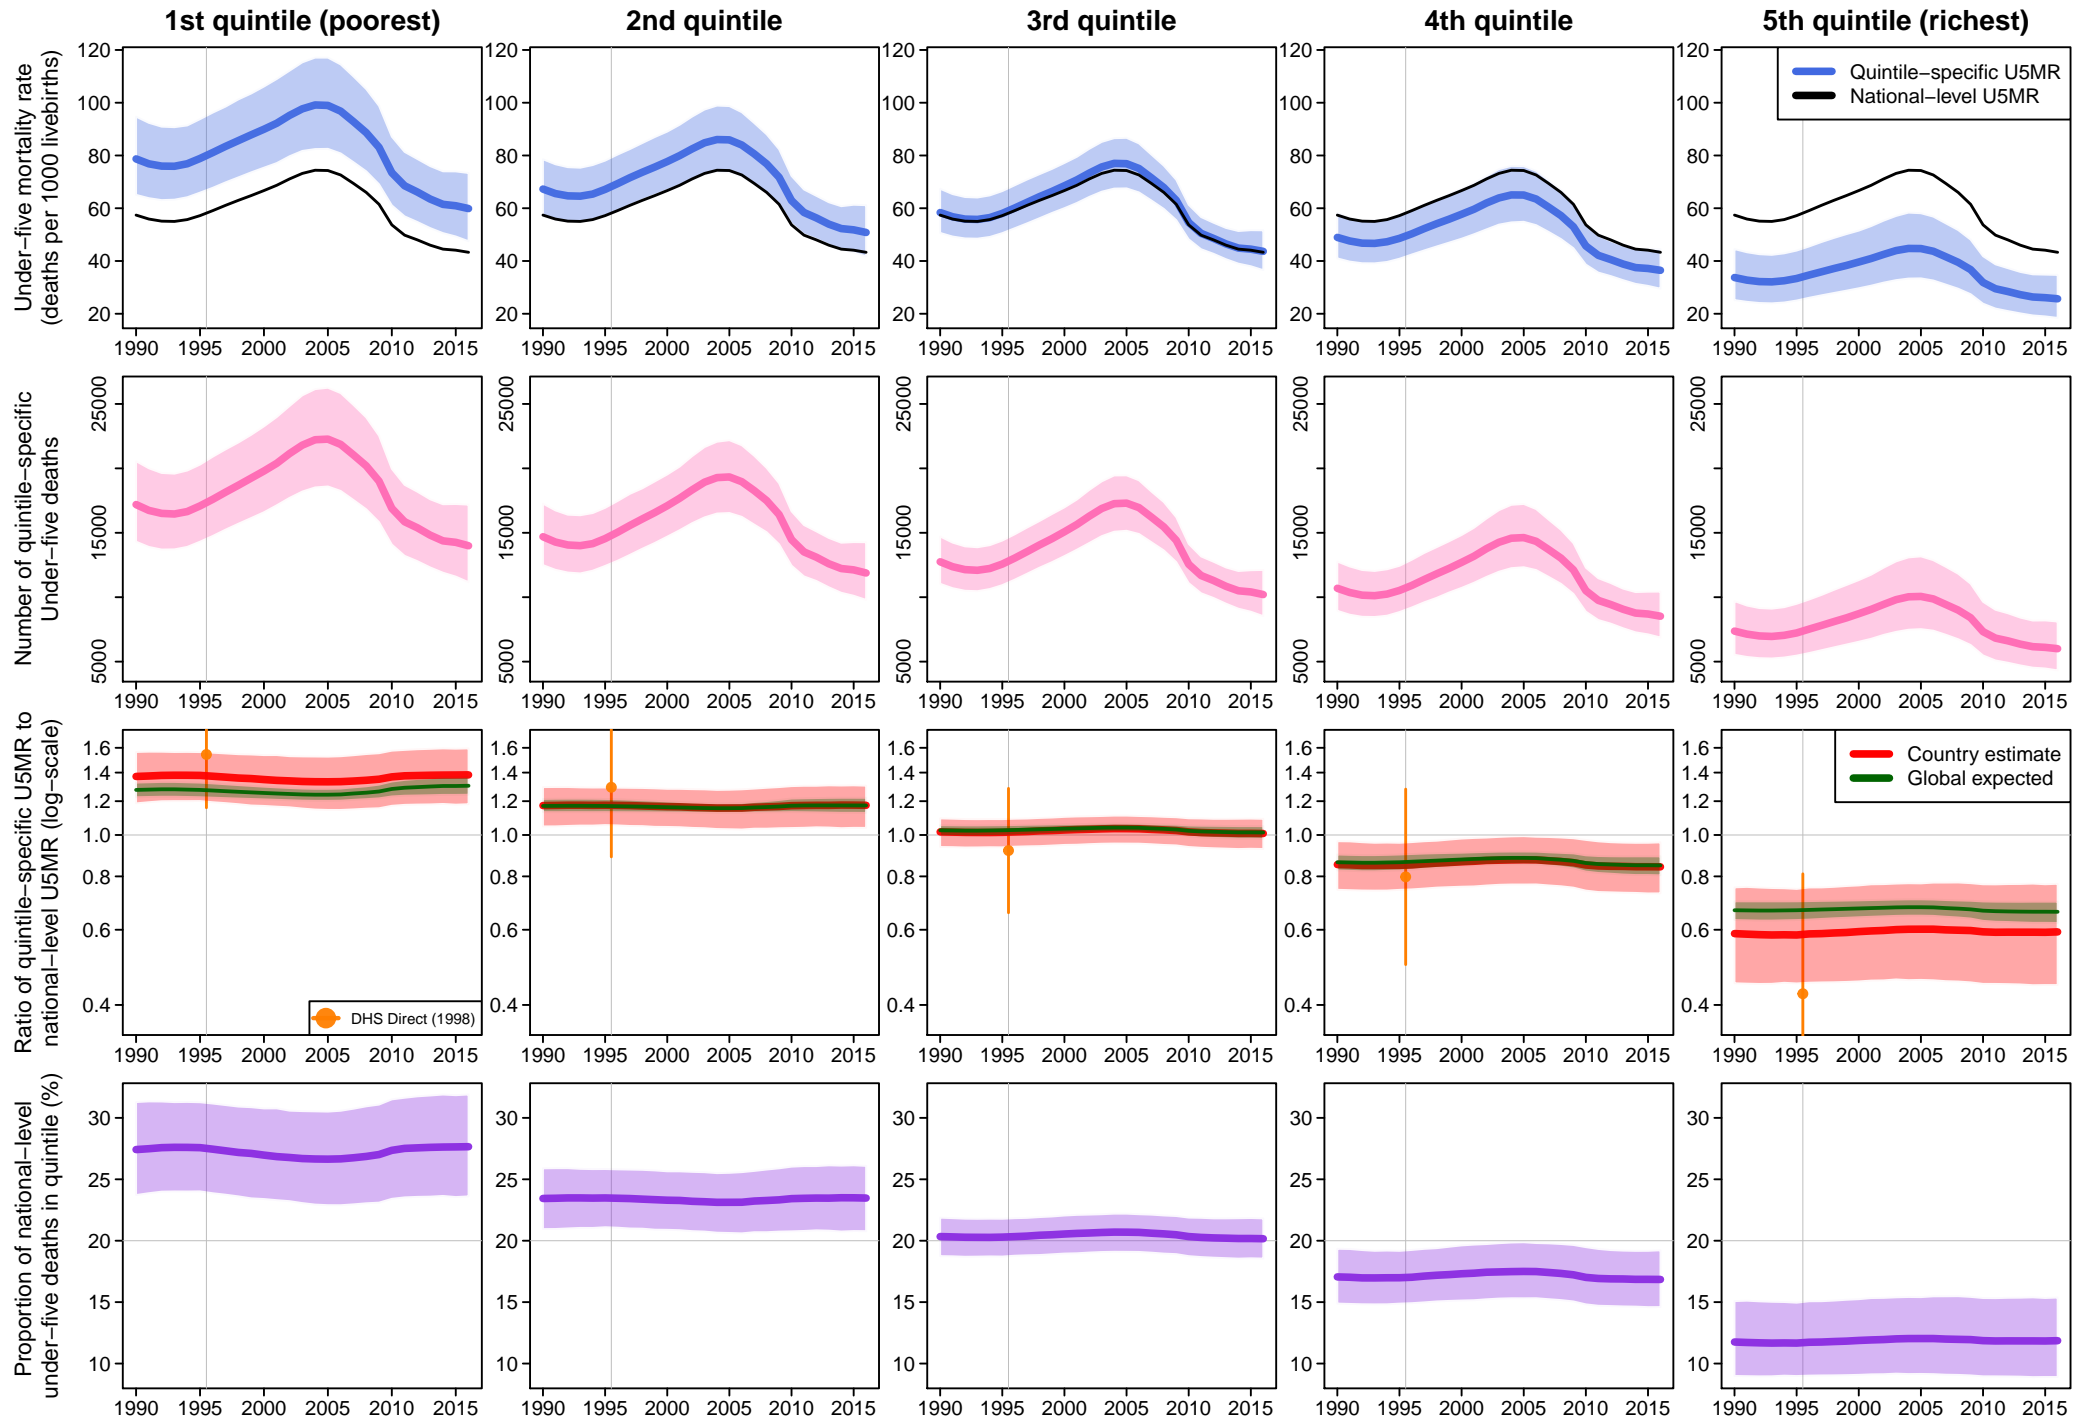



# South Sudan

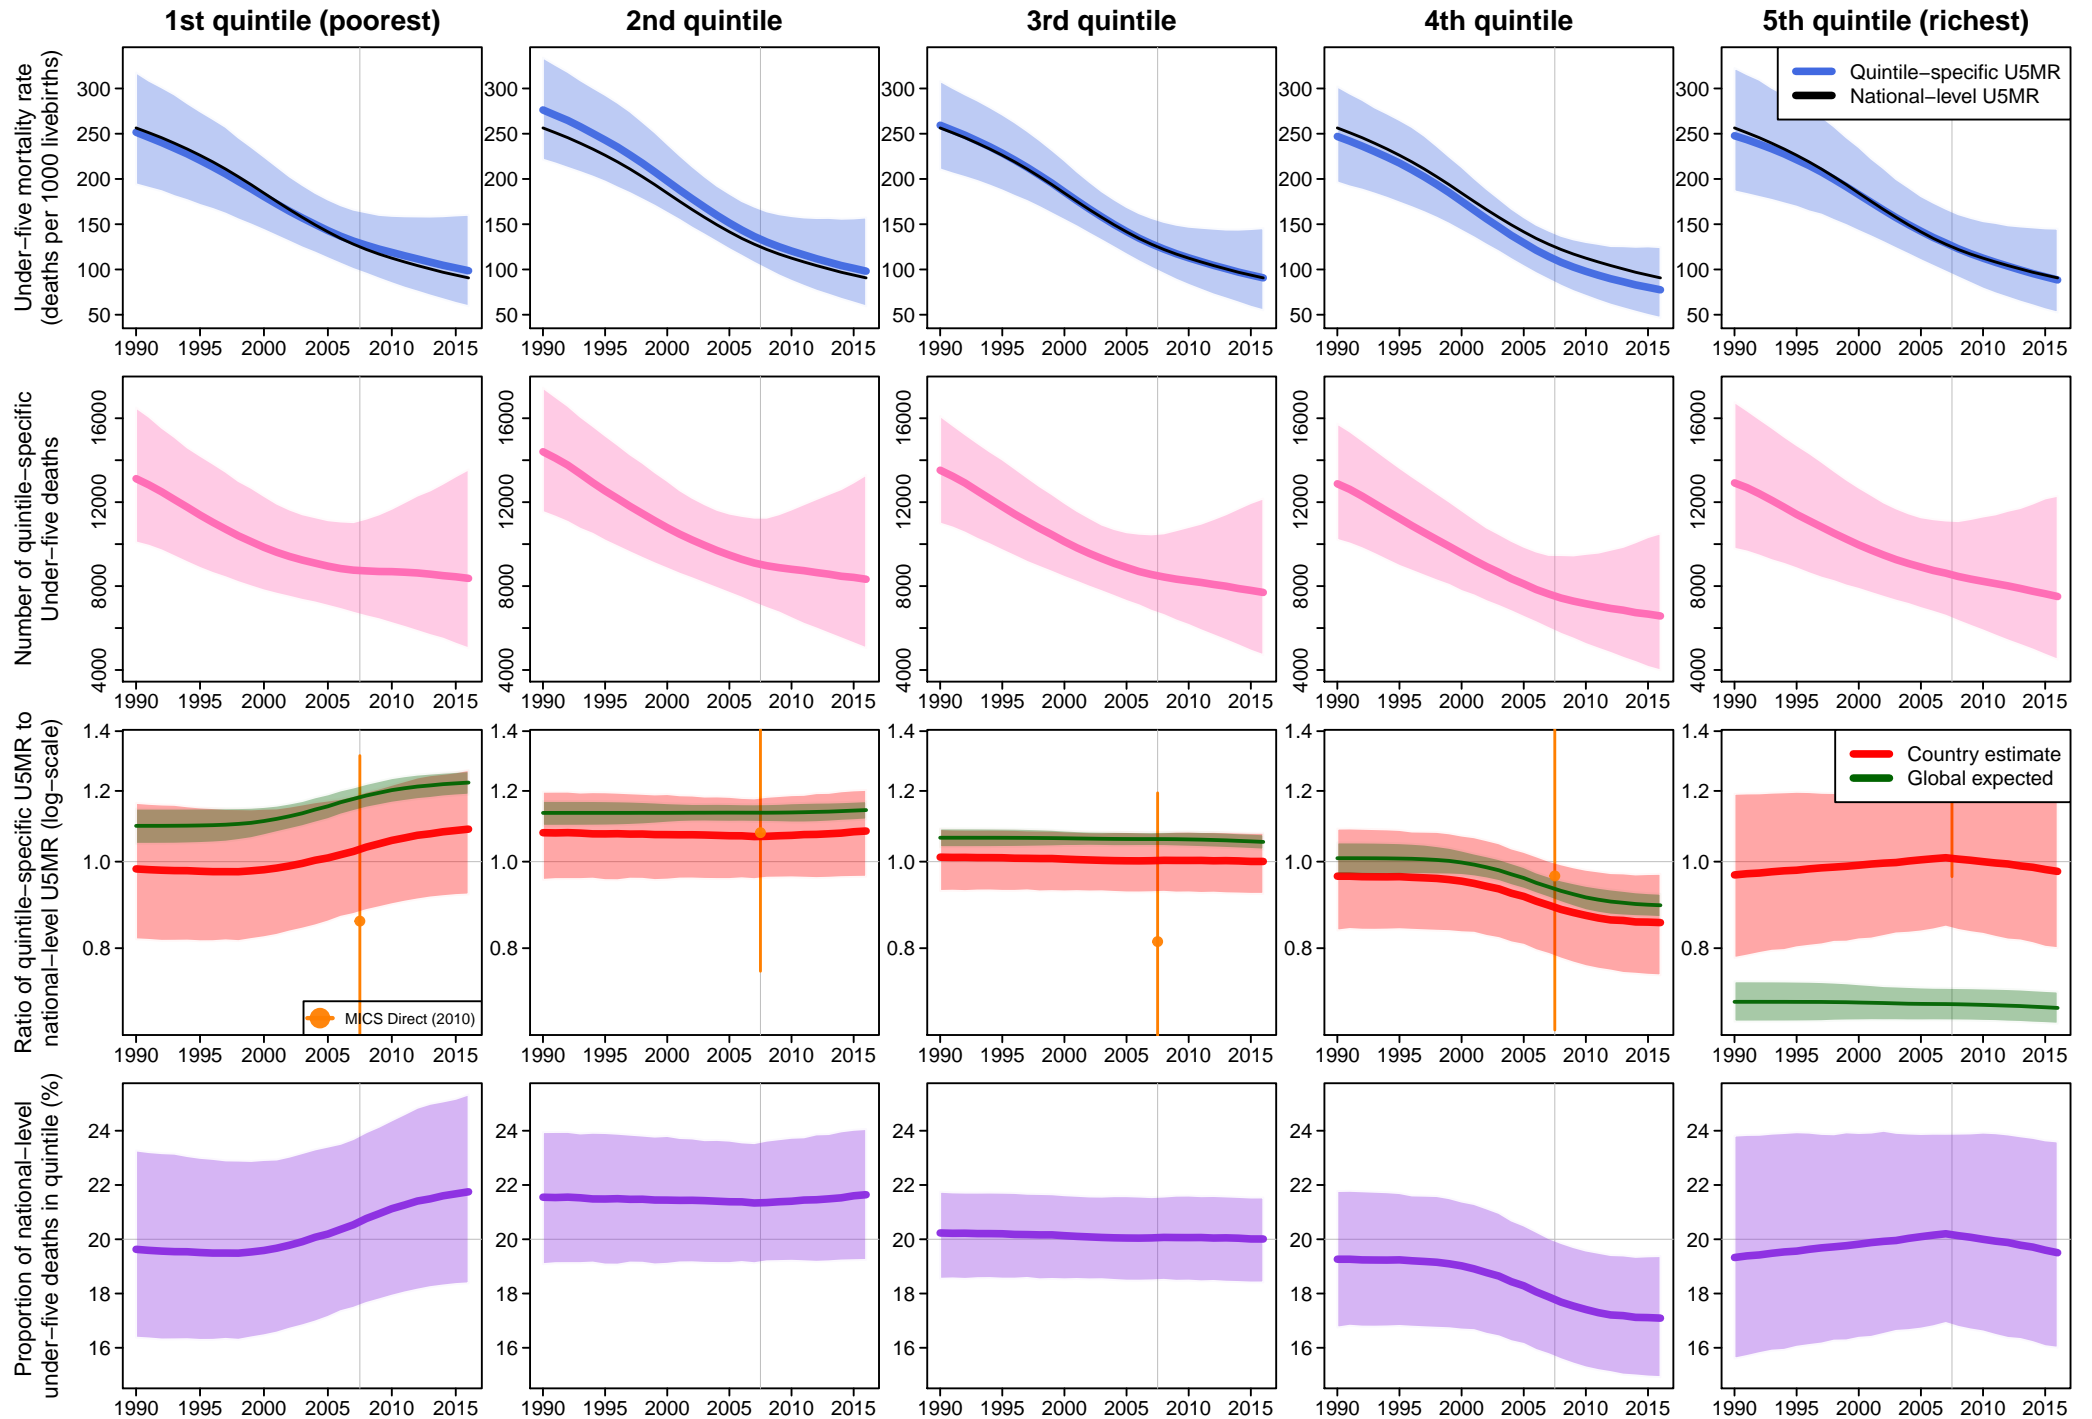

# State of Palestine

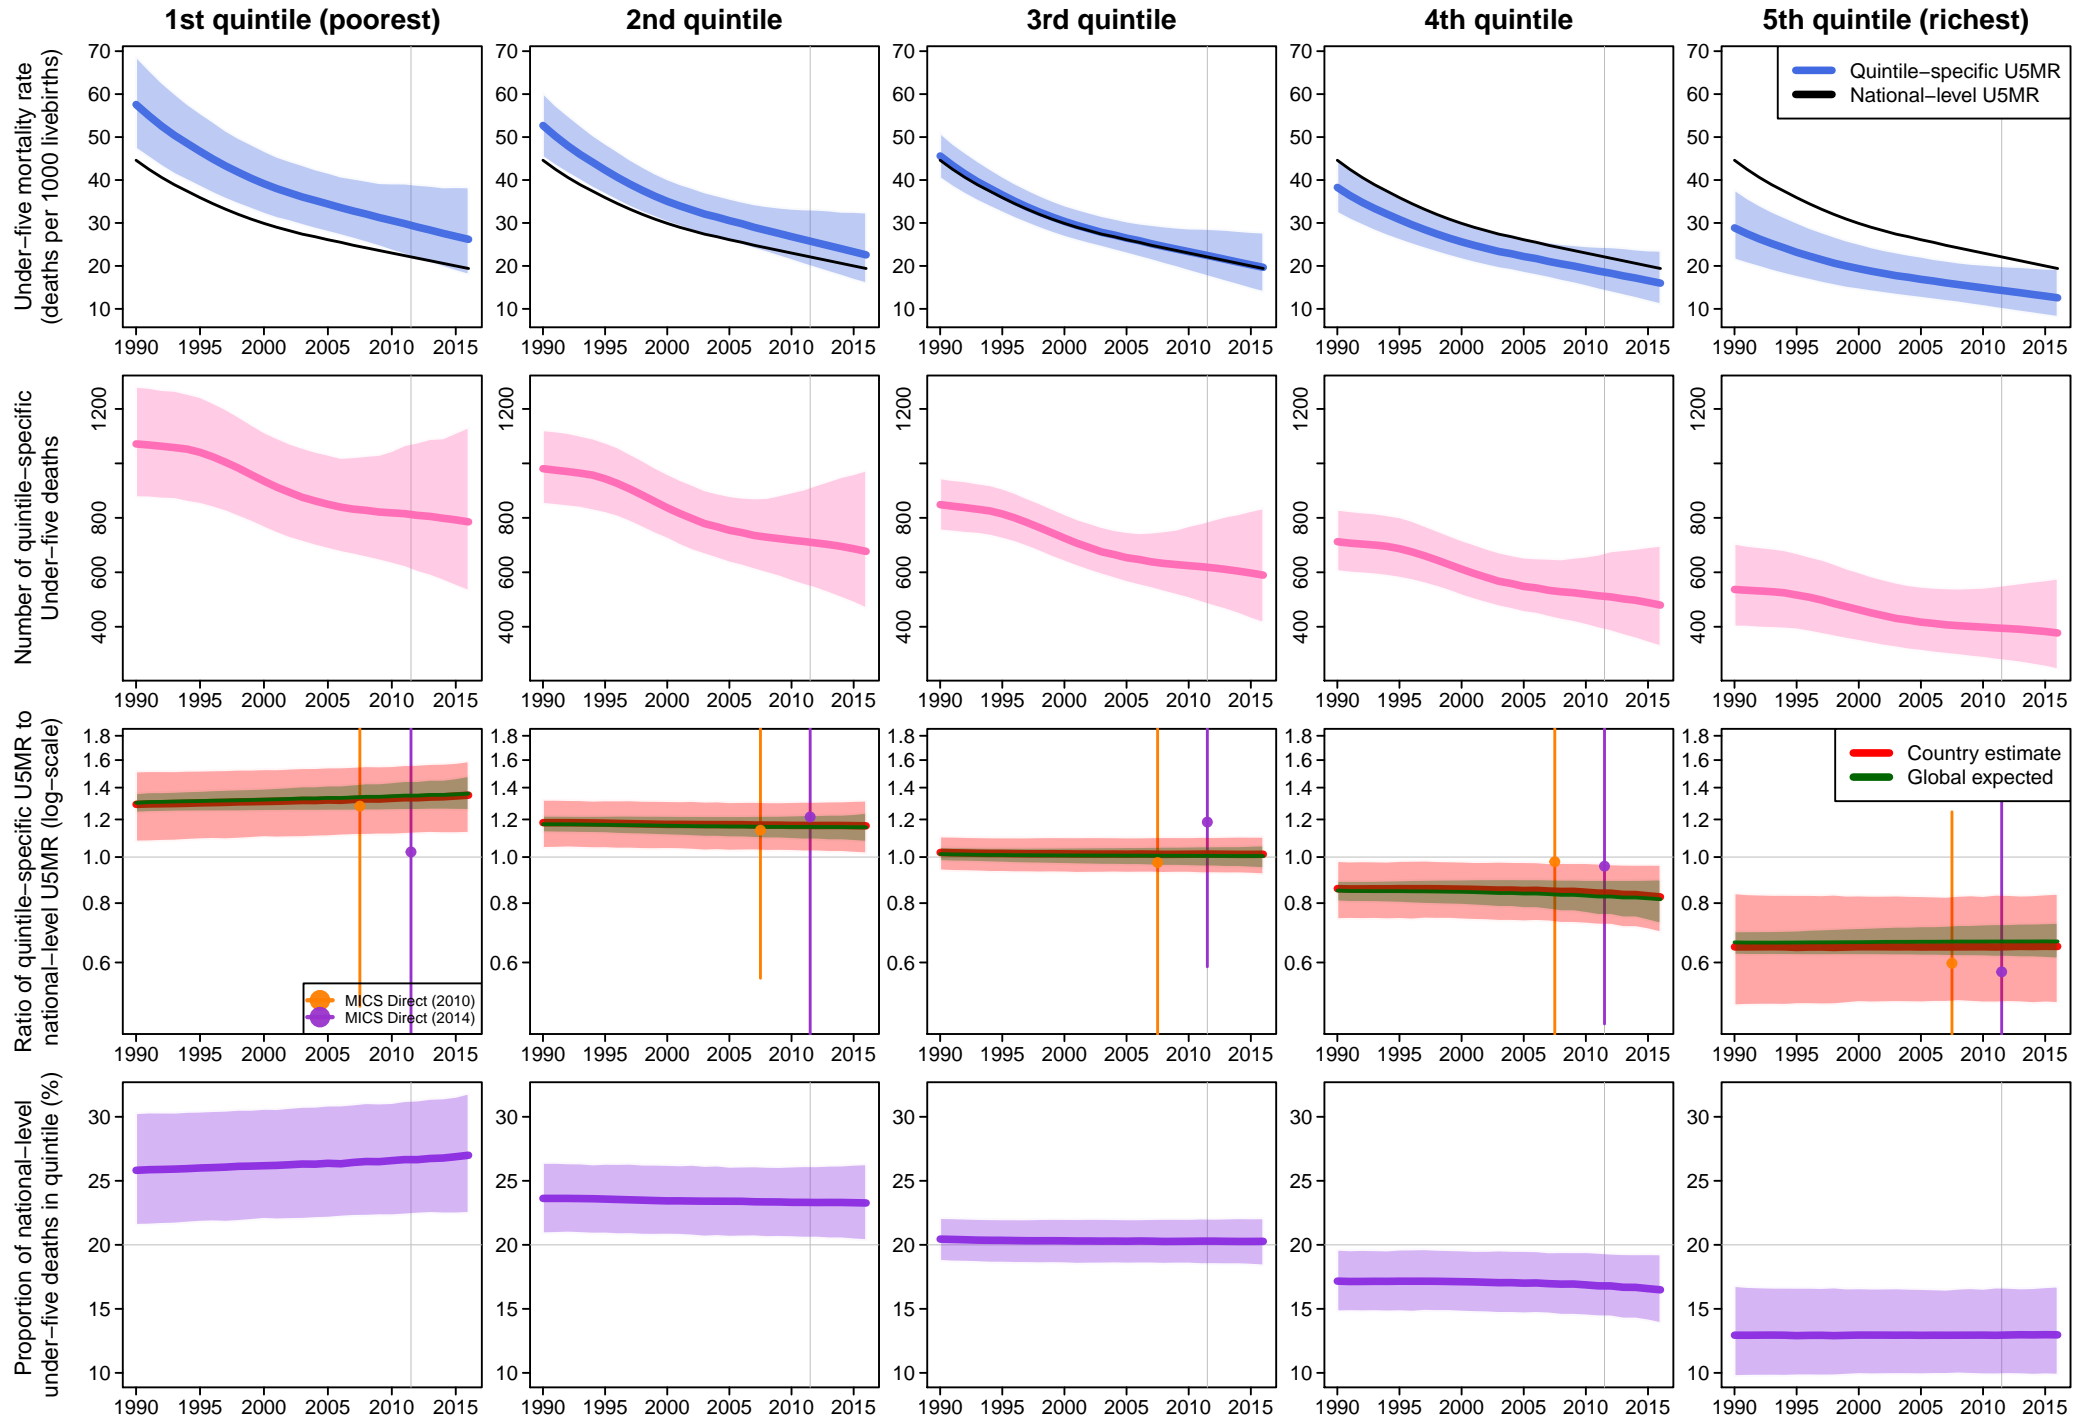

# Sudan

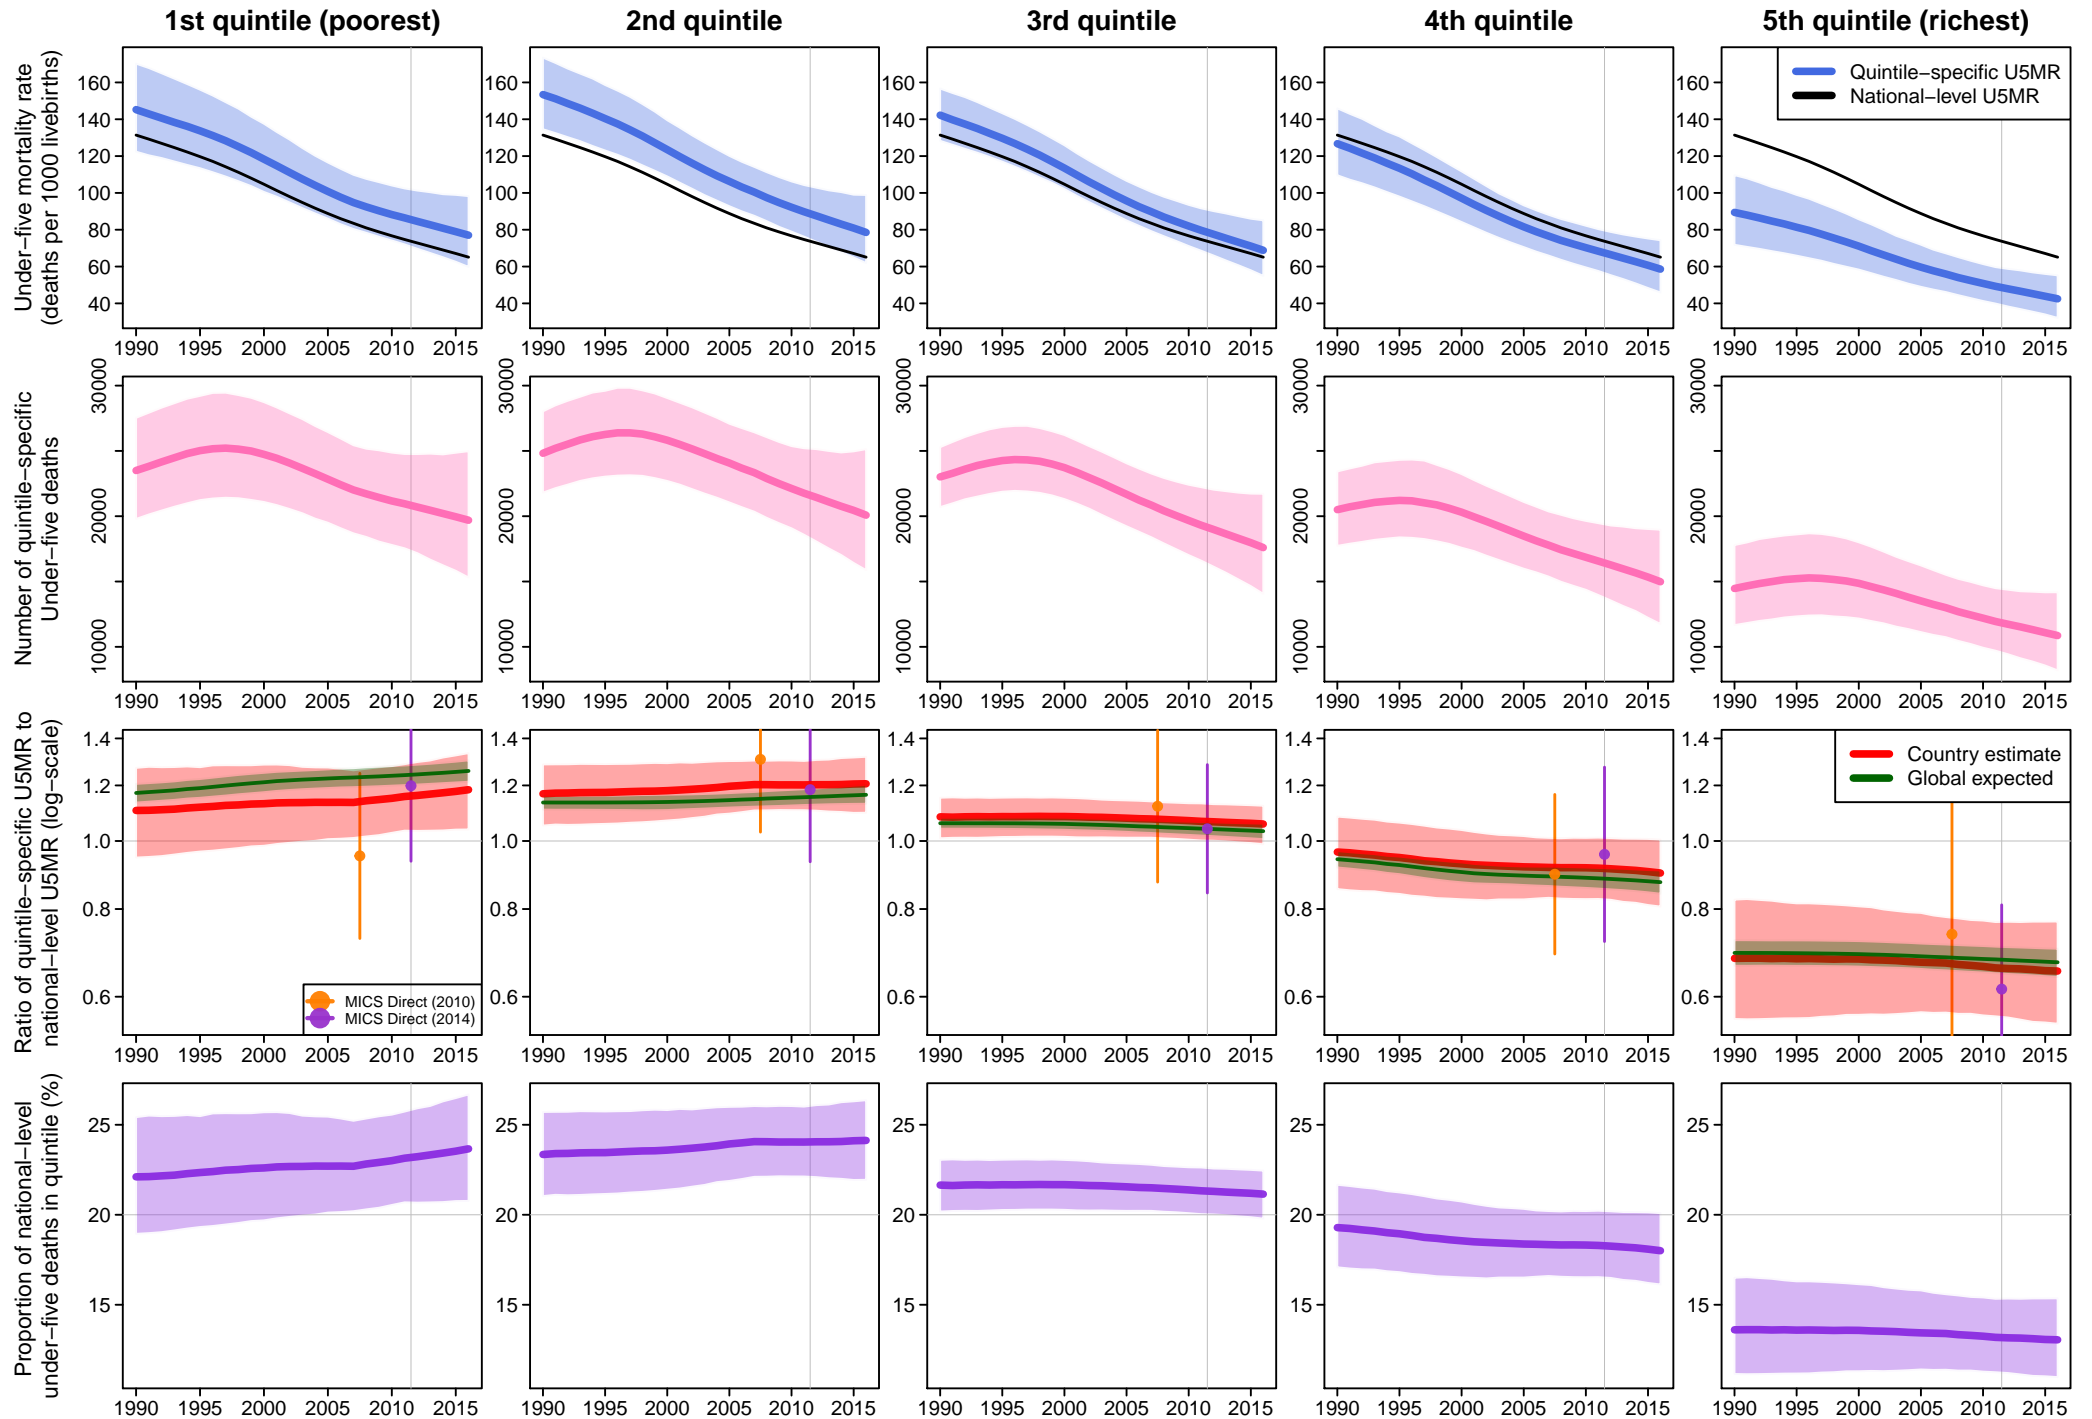

# Suriname

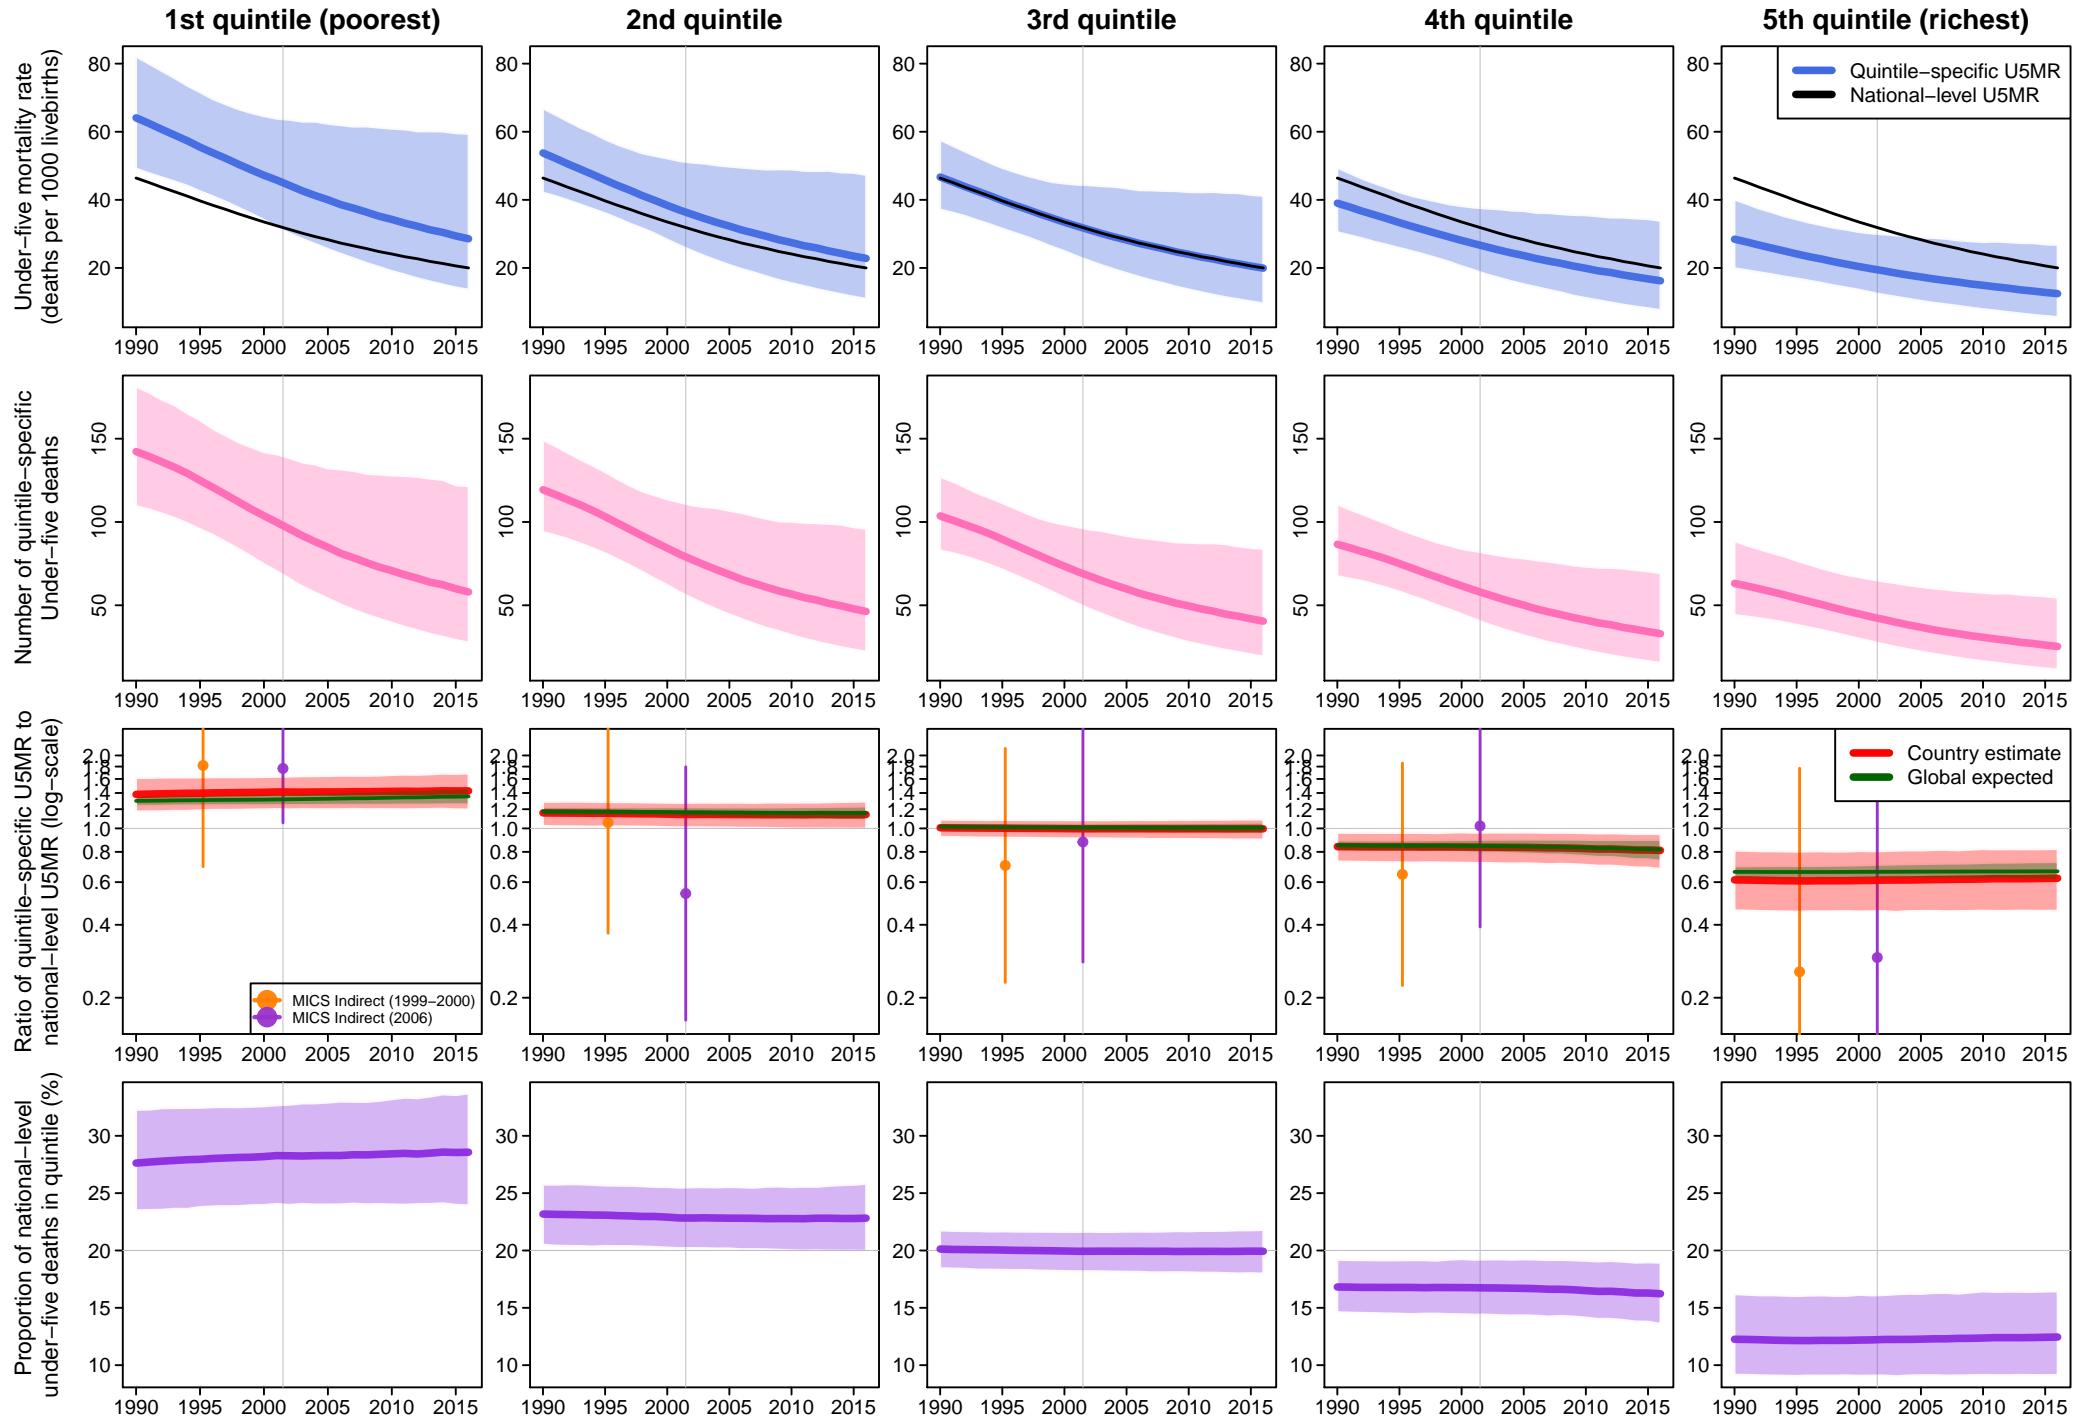

# Swaziland

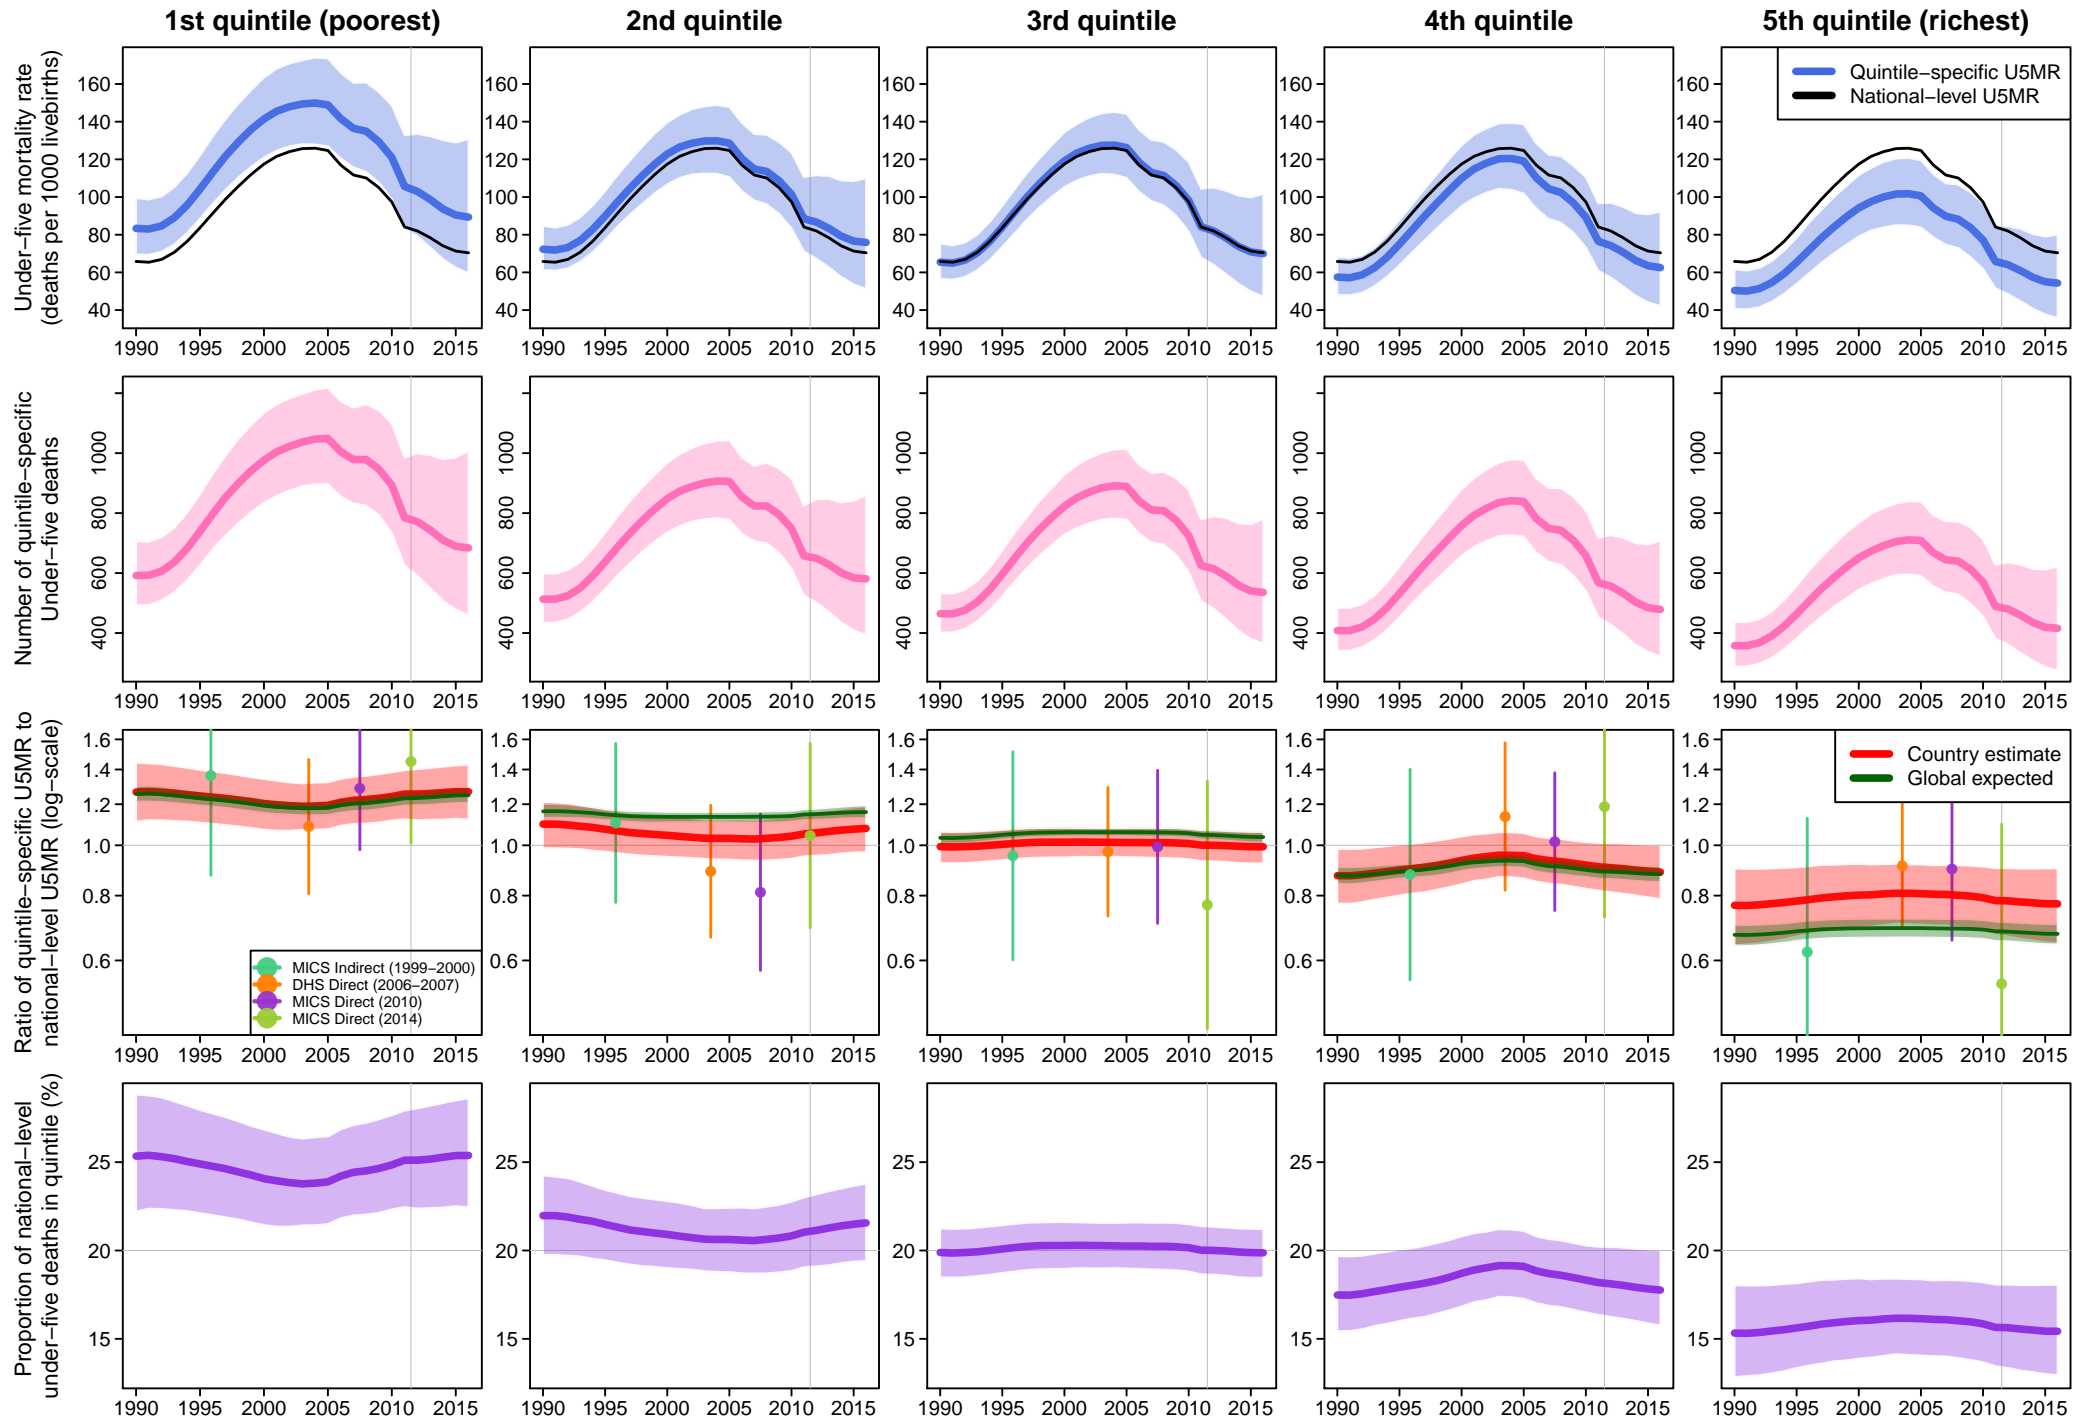

# Syrian Arab Republic

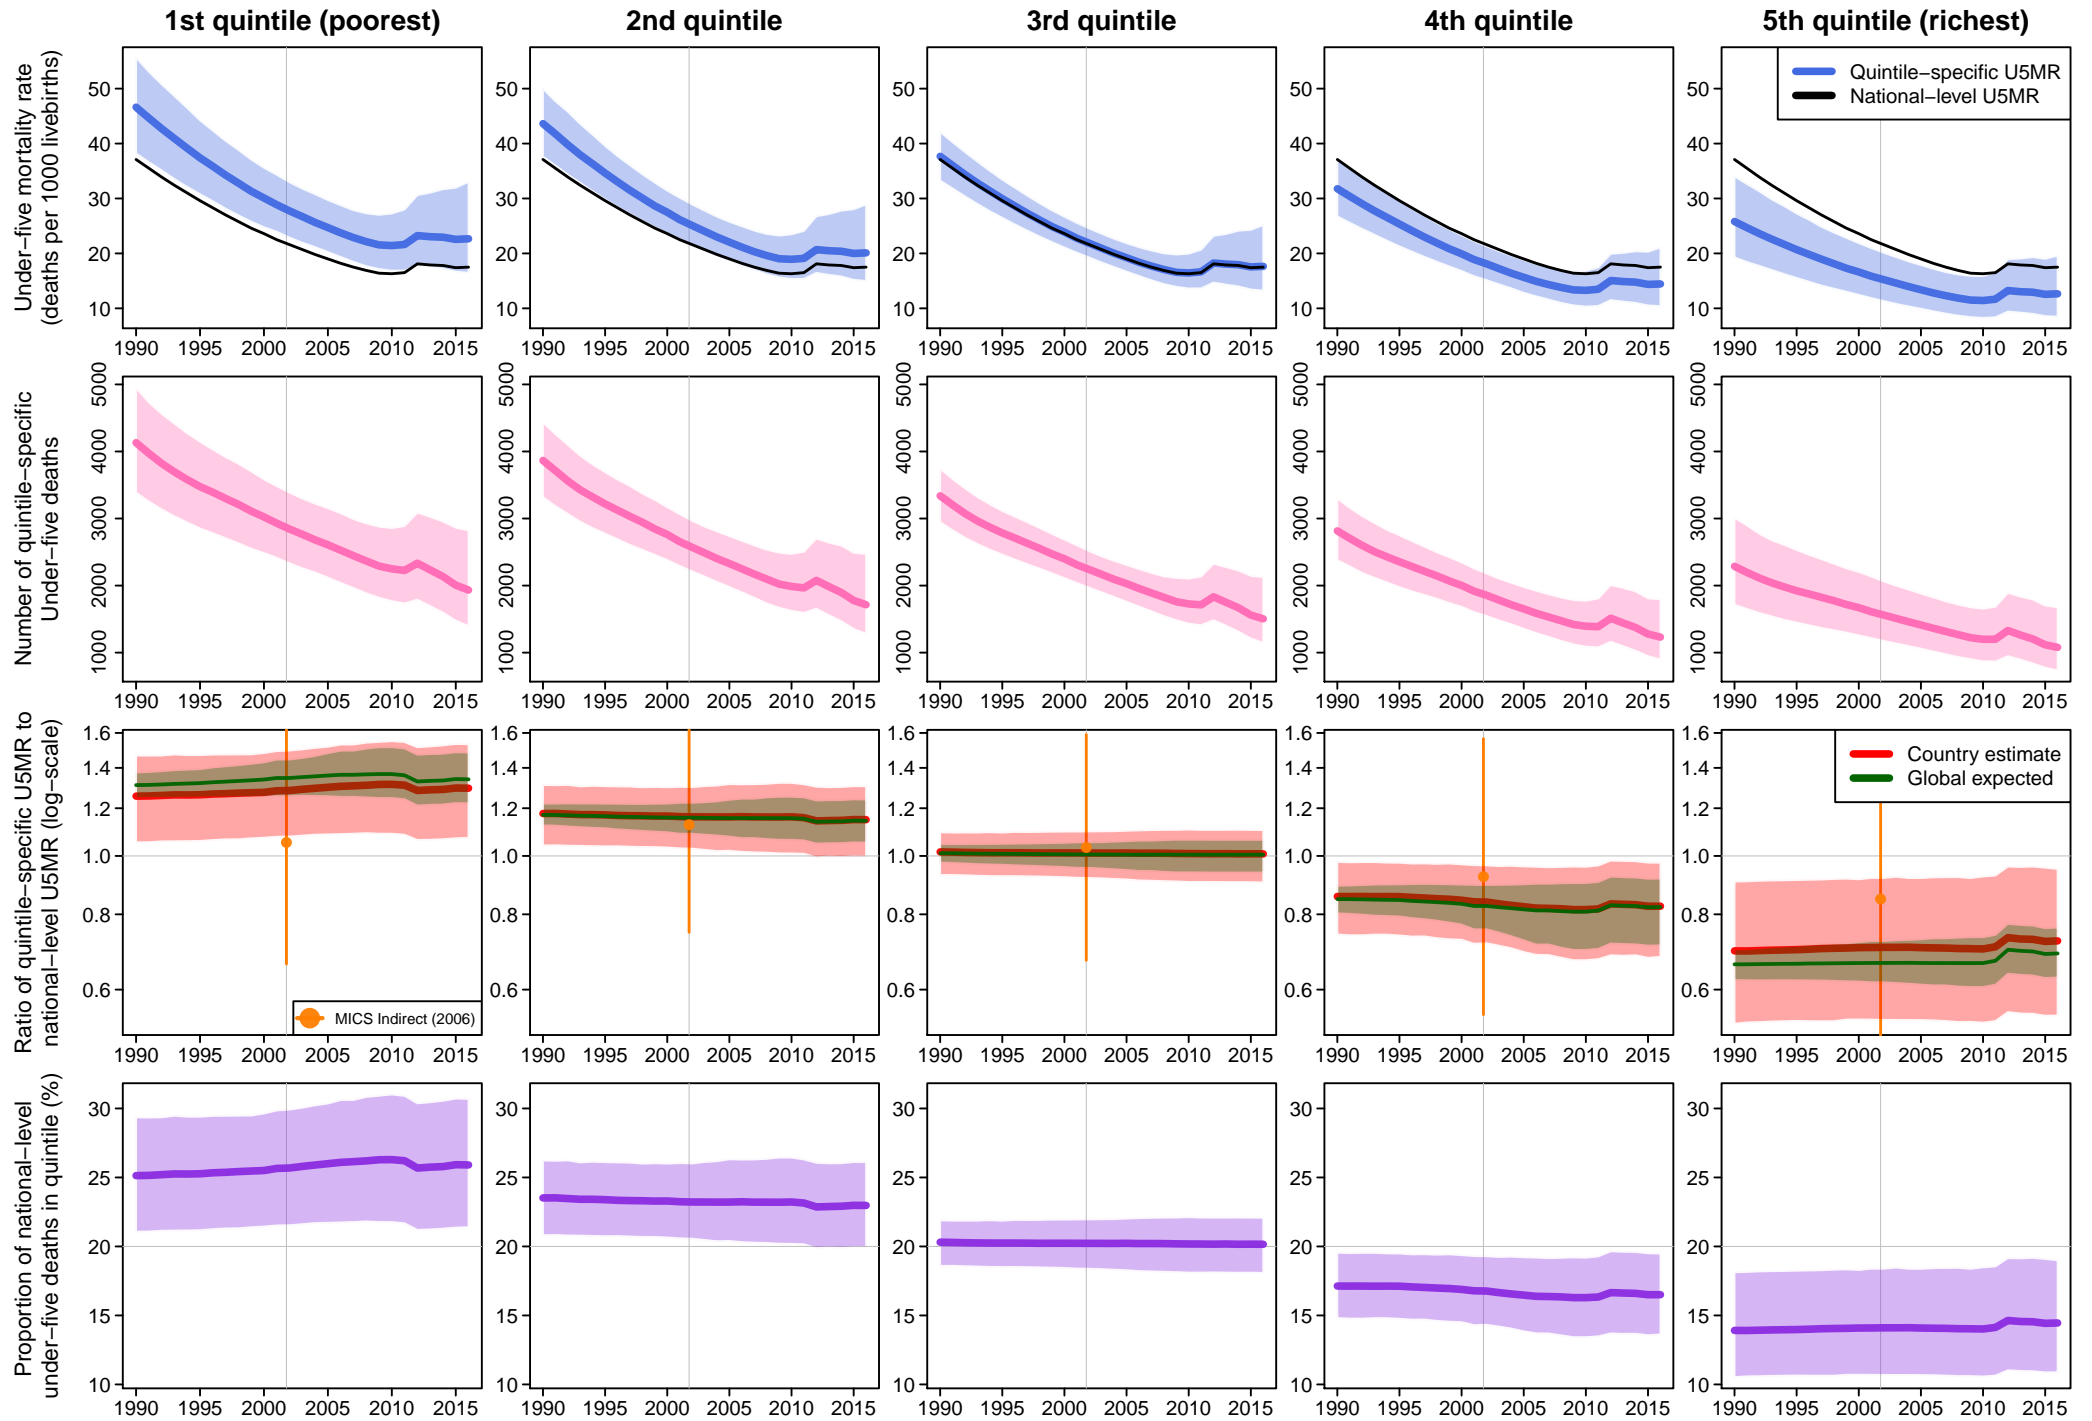

# Tajikistan

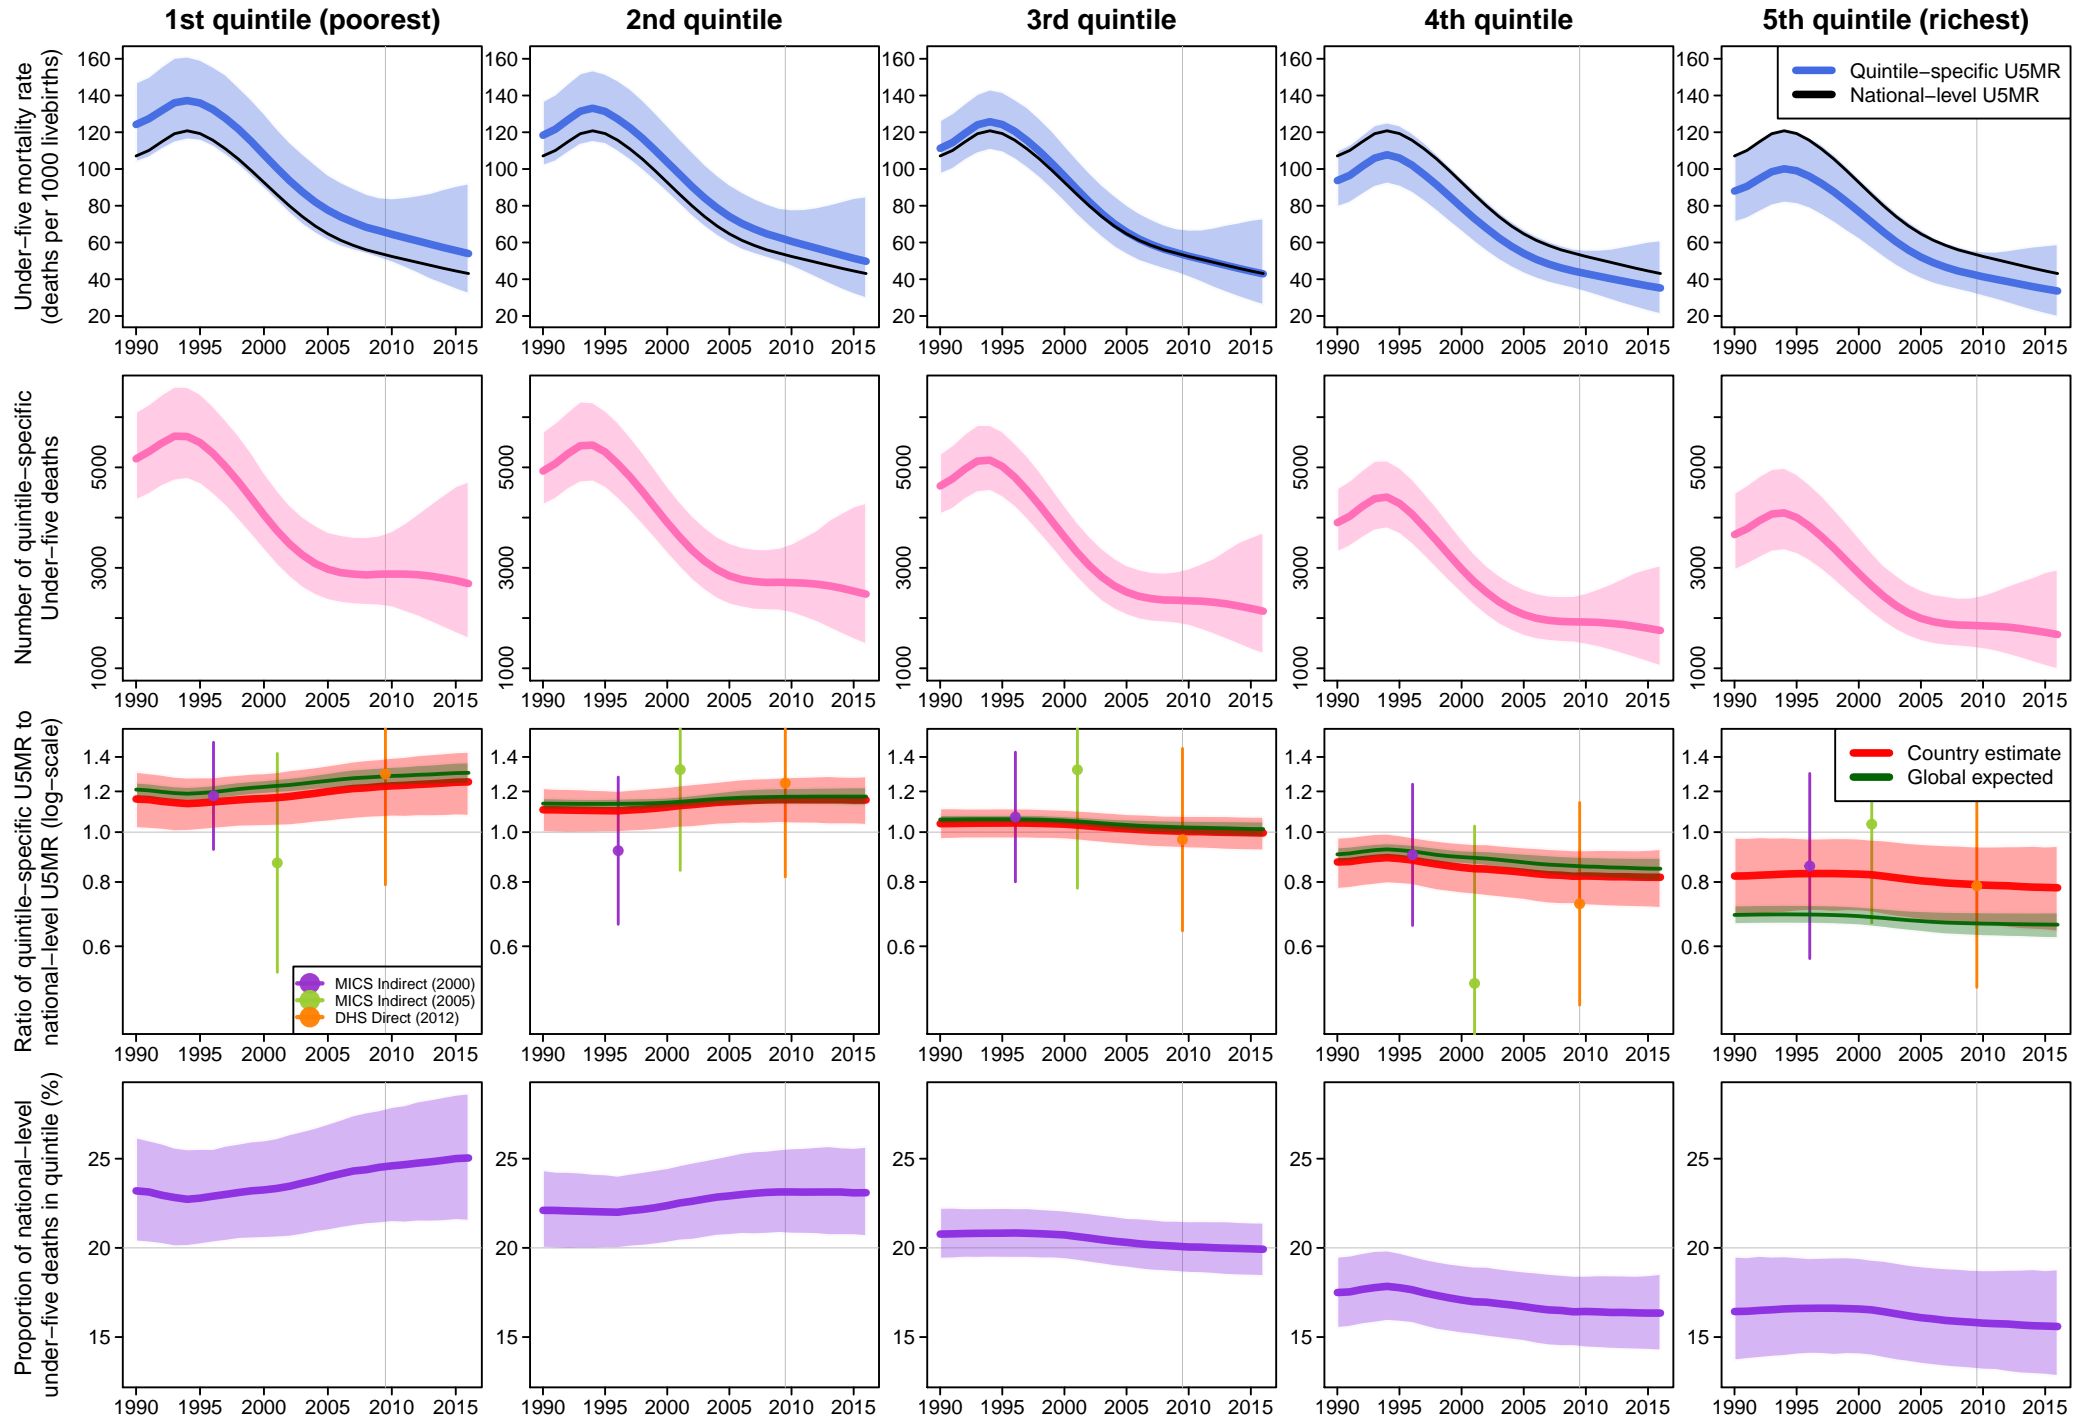

# Thailand

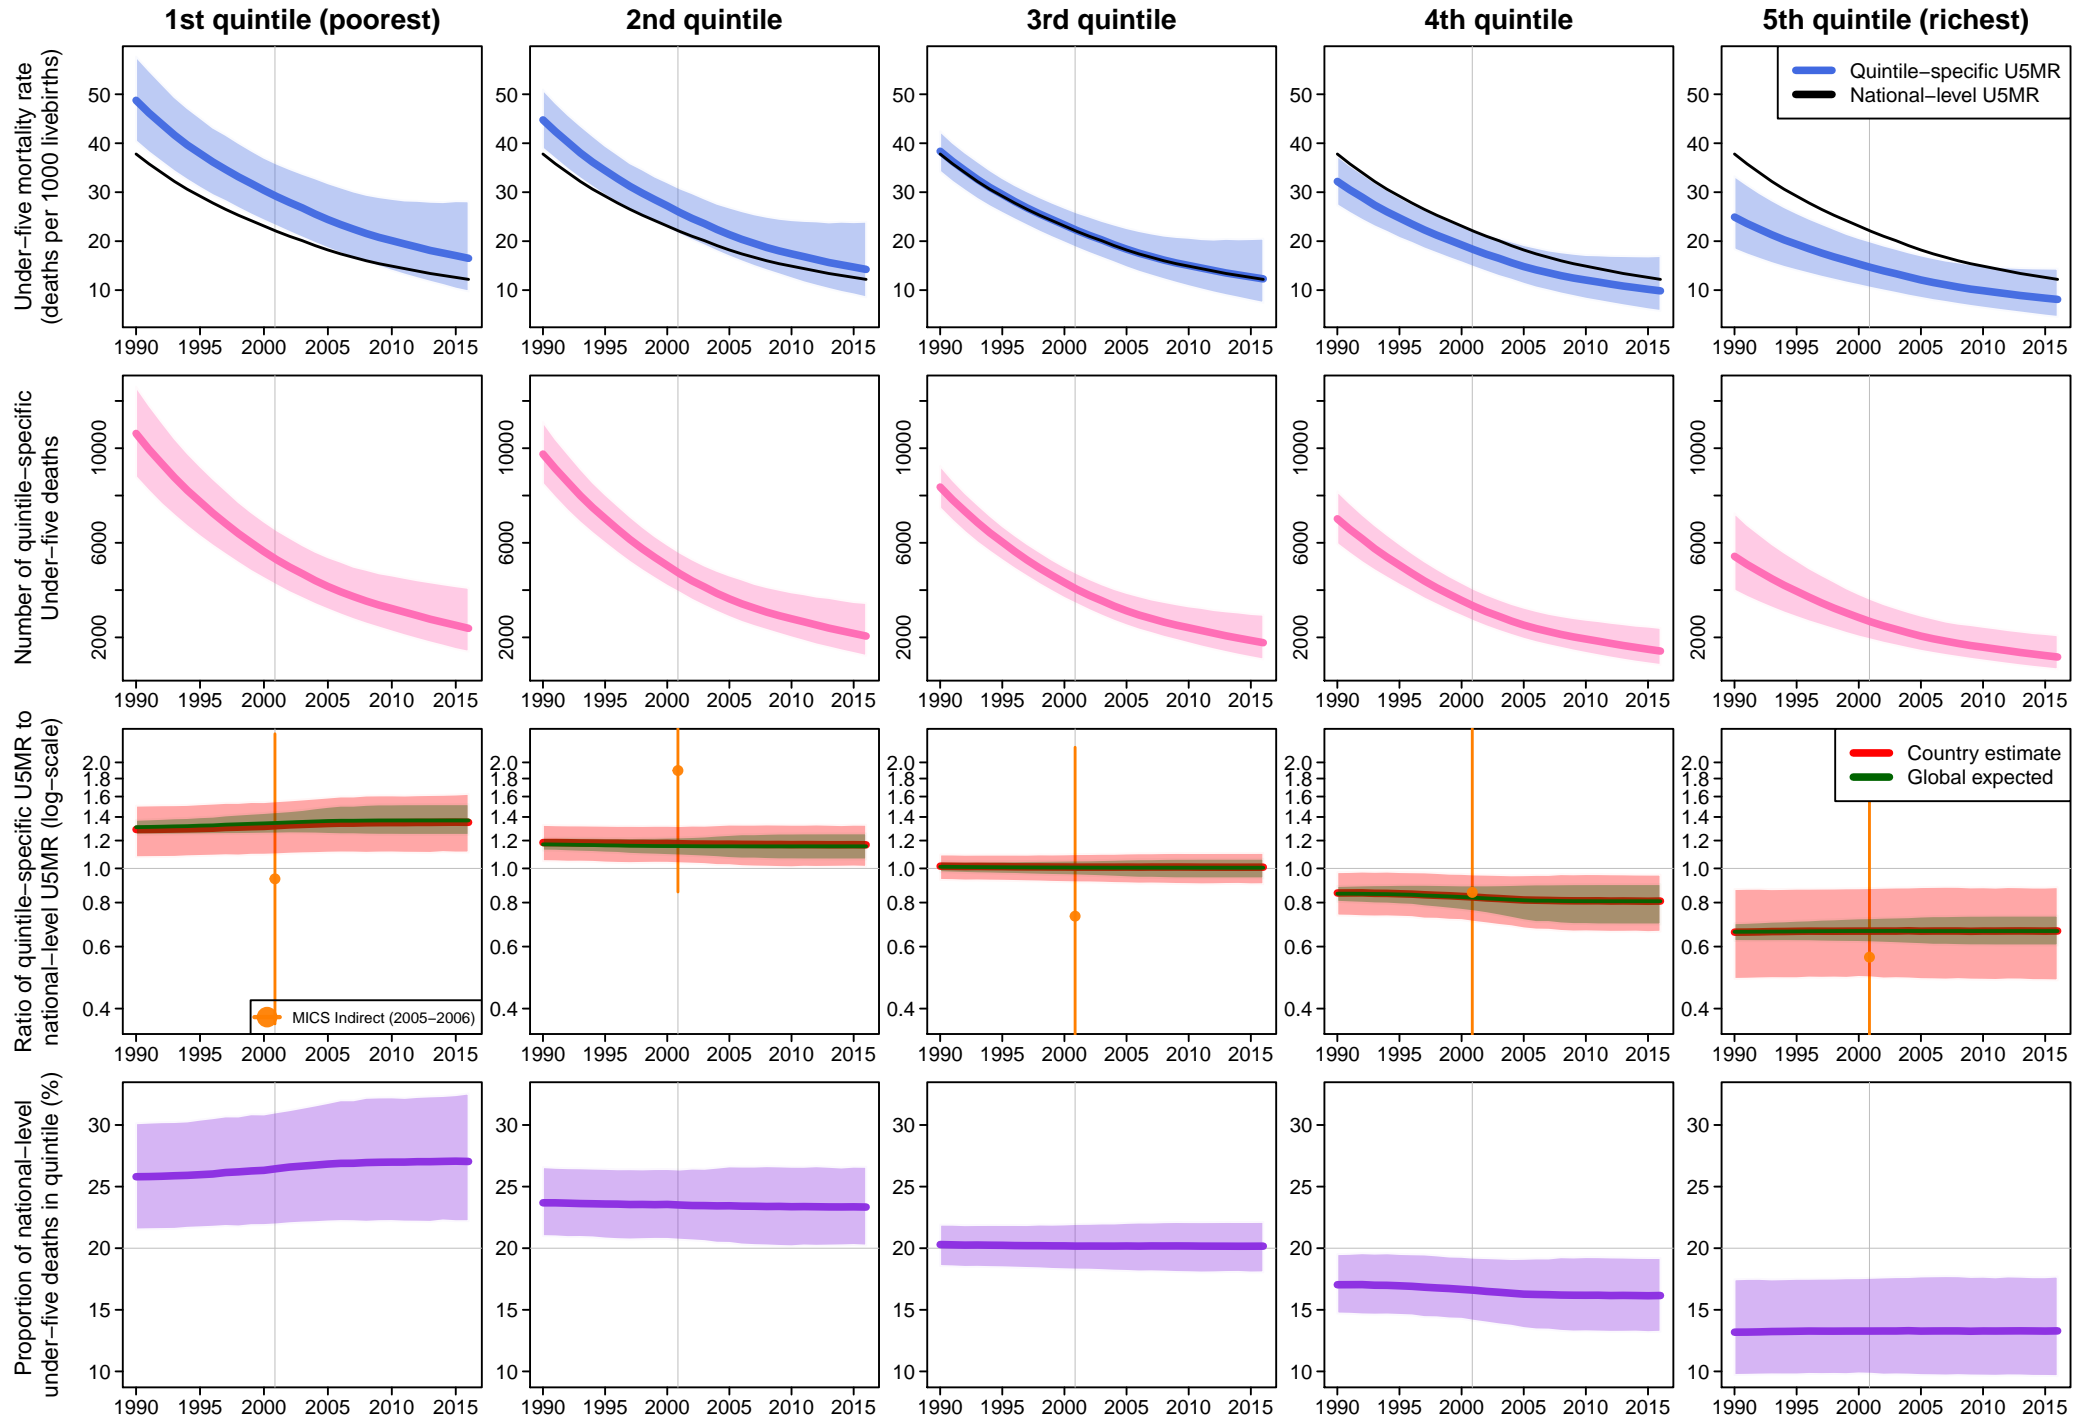



# The former Yugoslav Republic of Macedonia

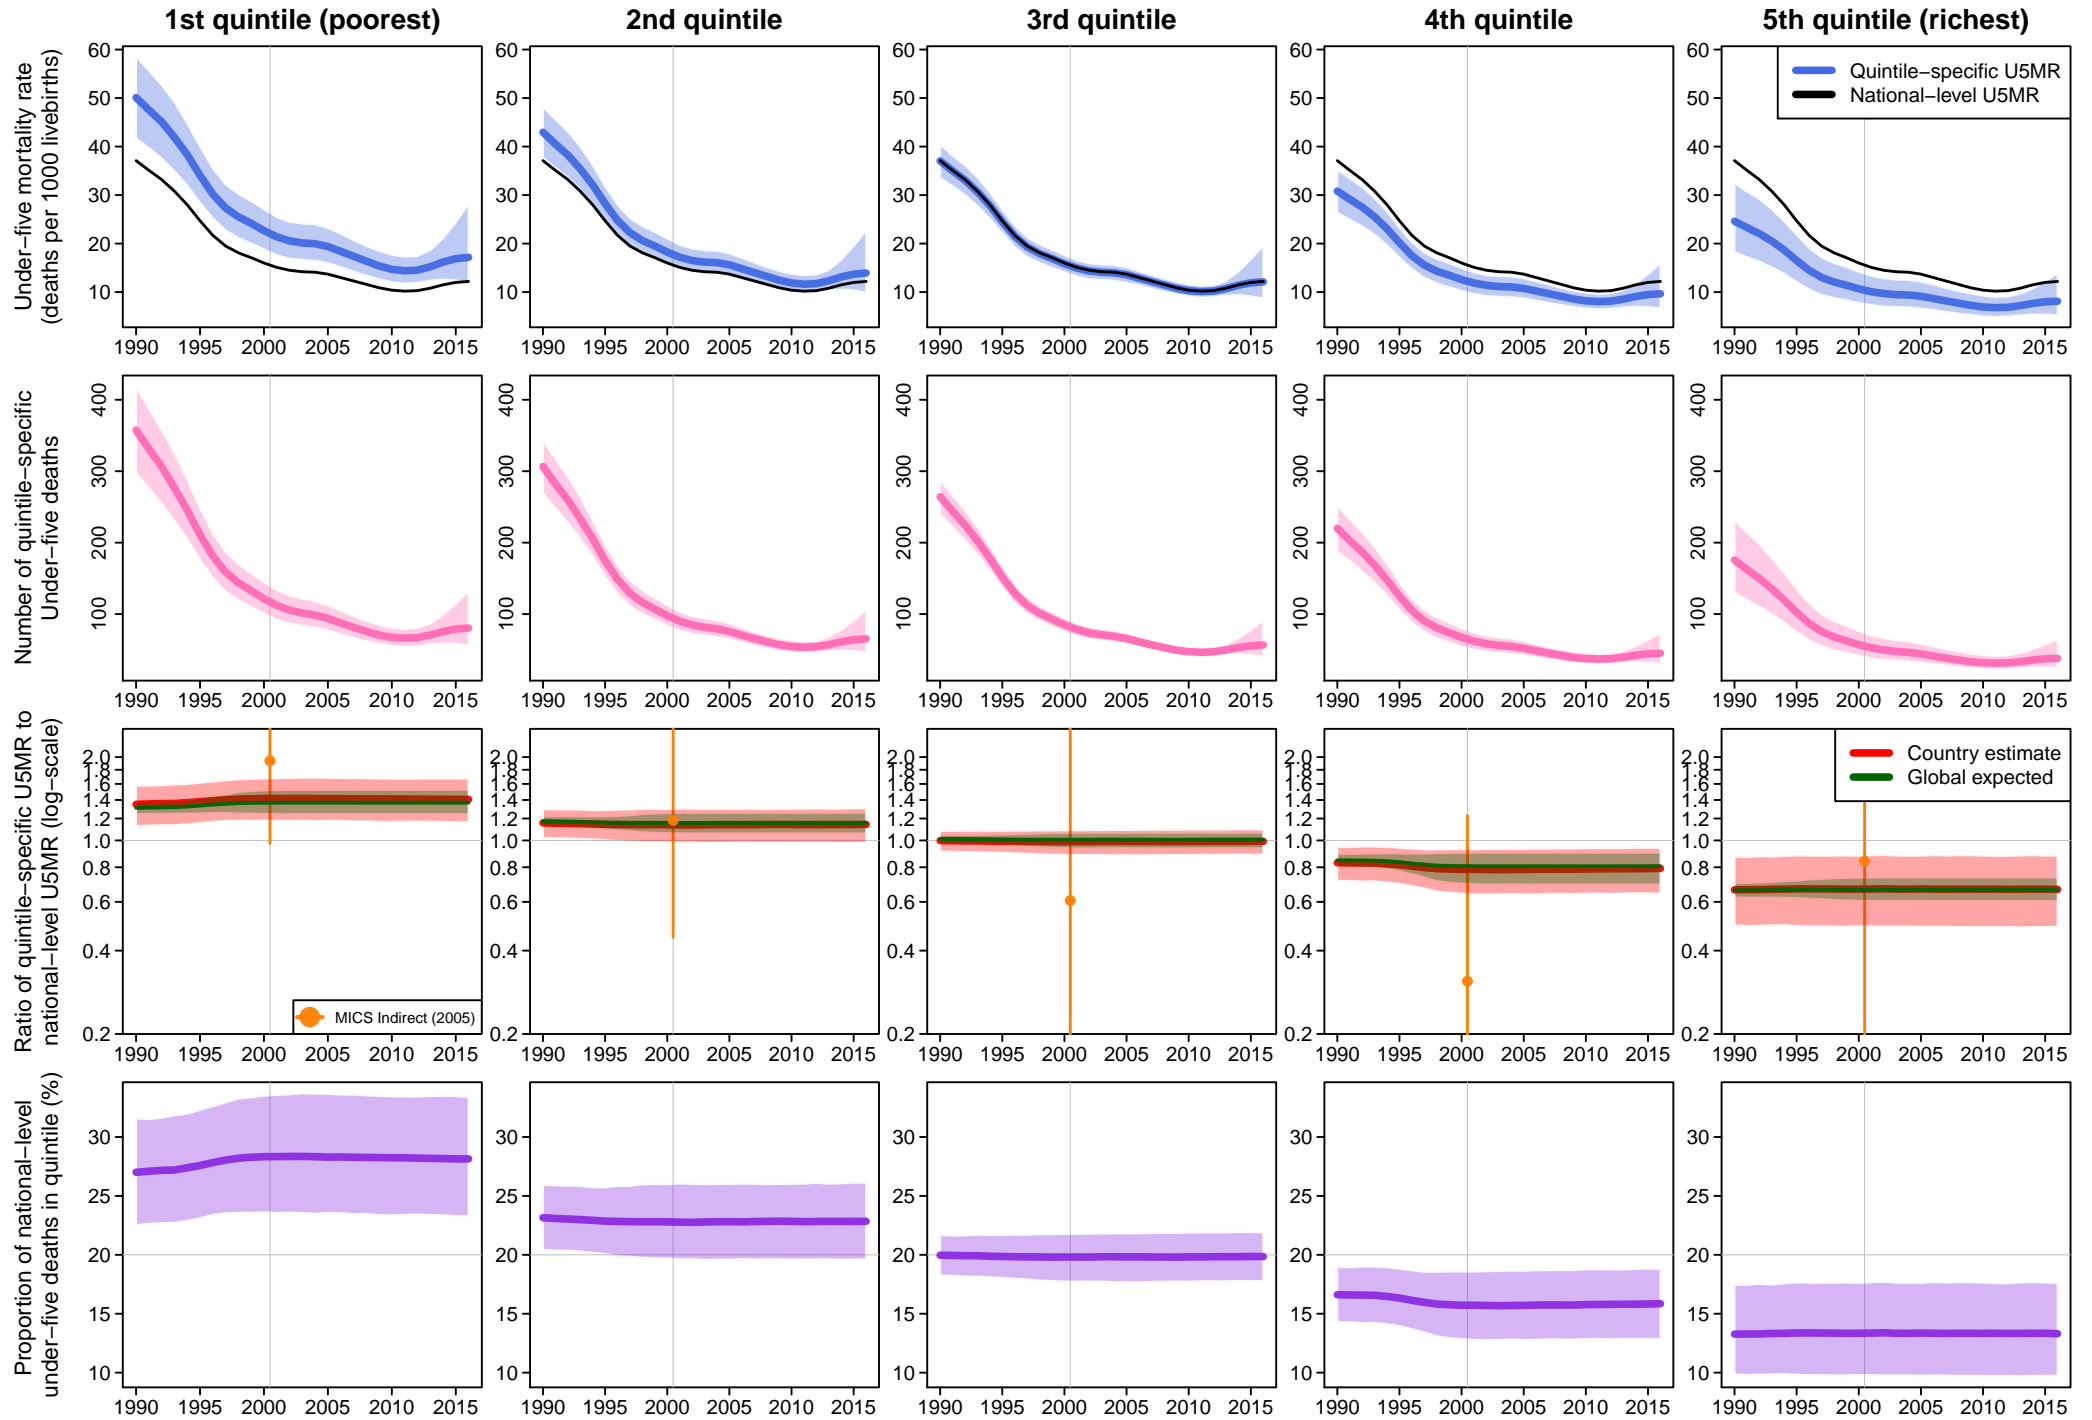

# Gambia

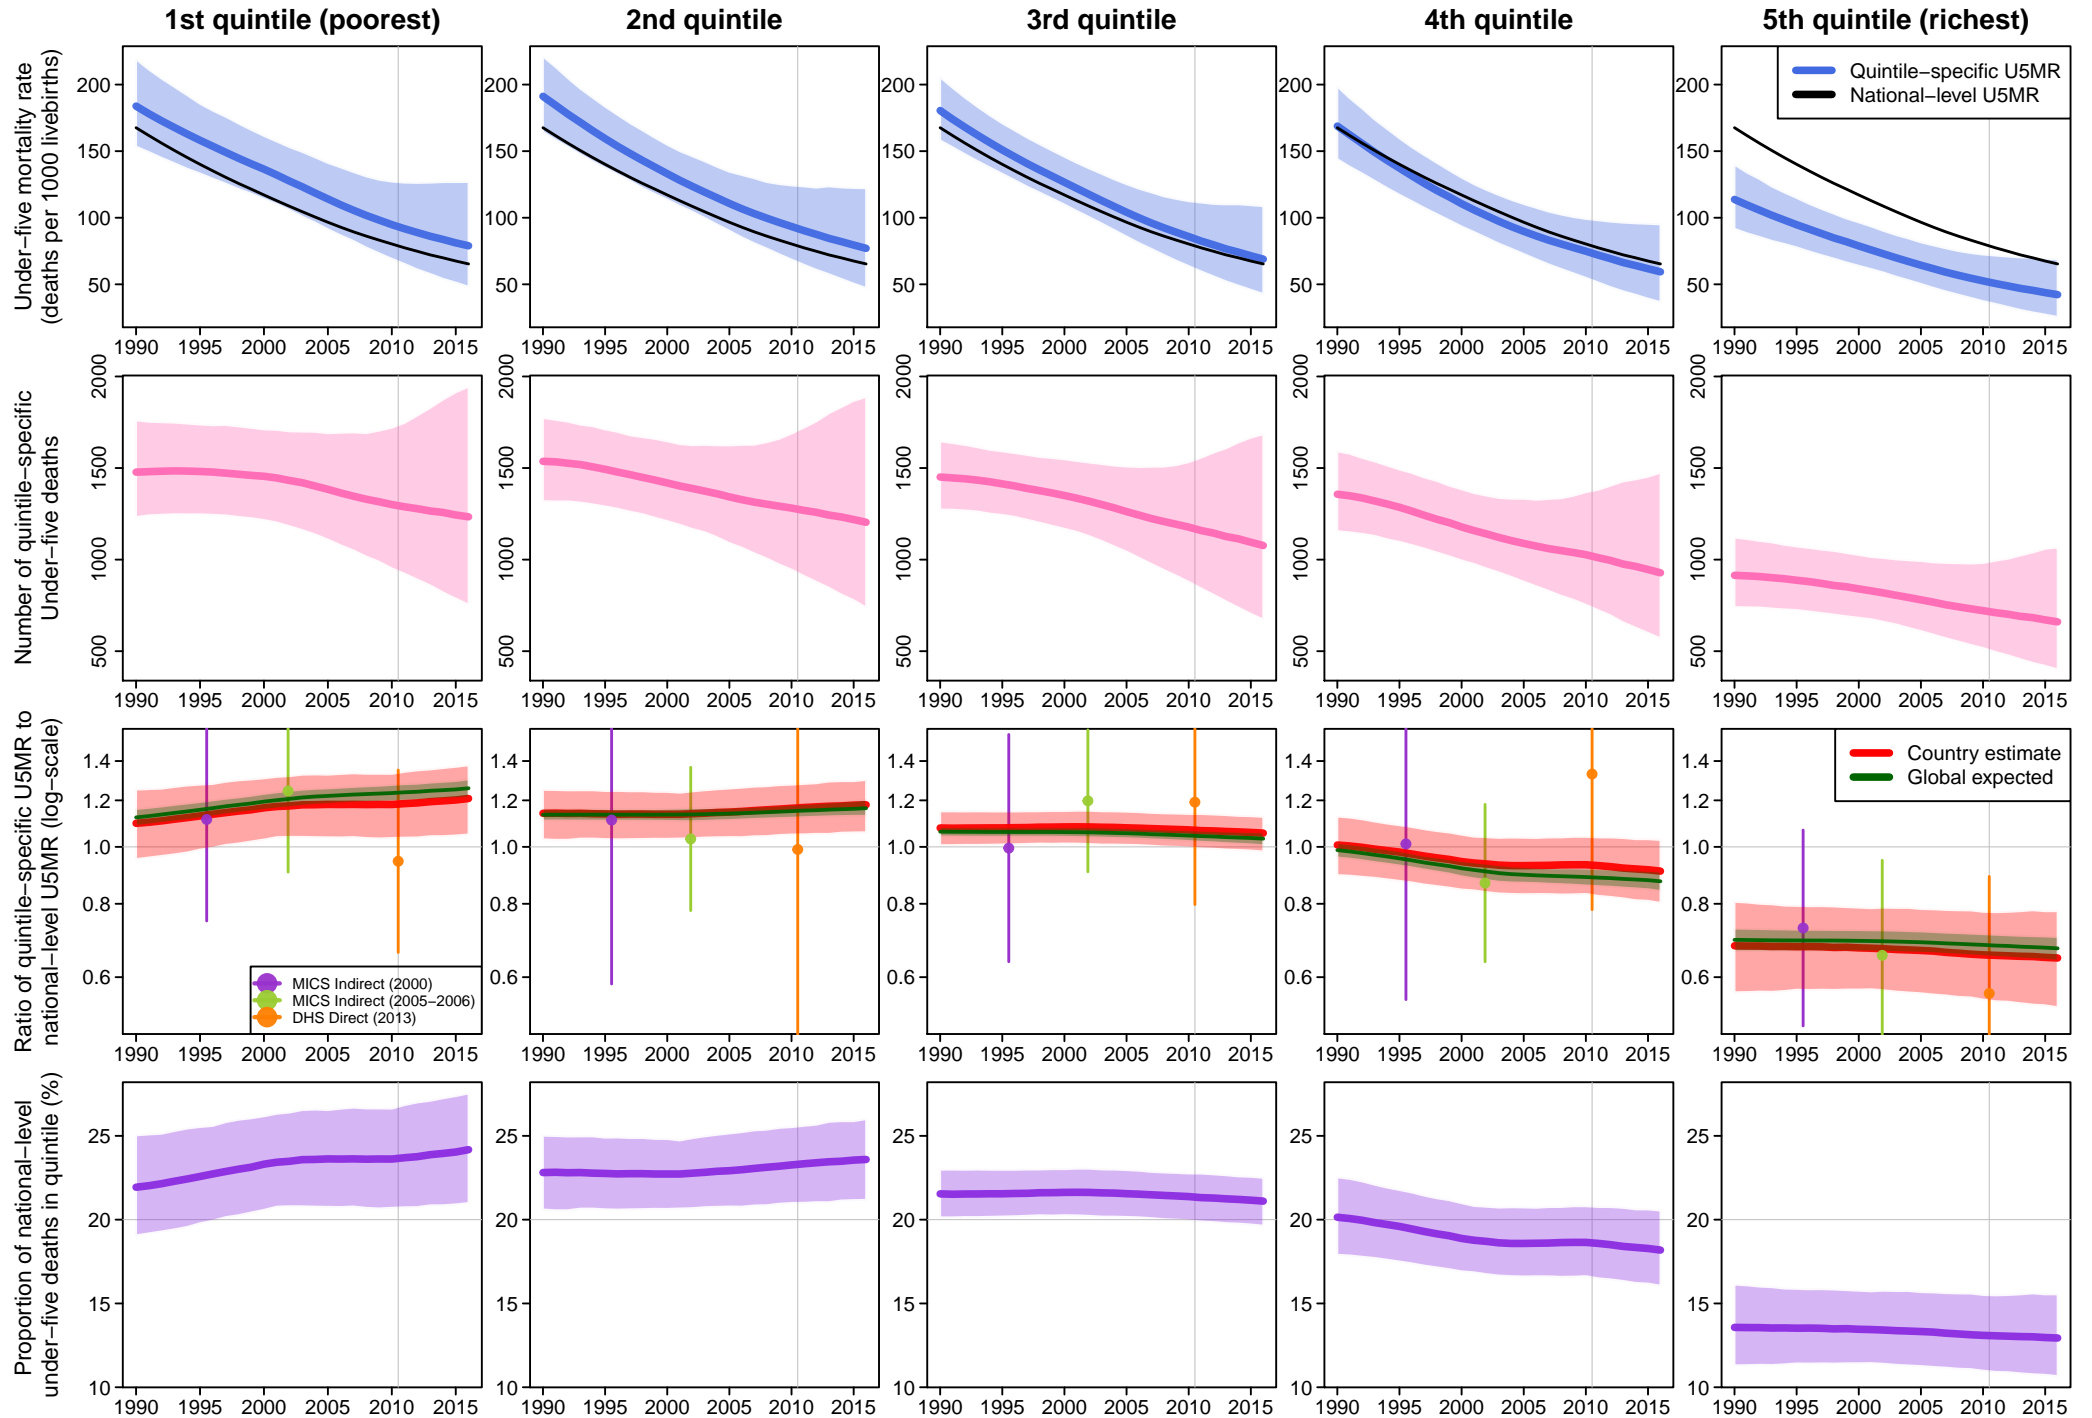

# Timor-Leste

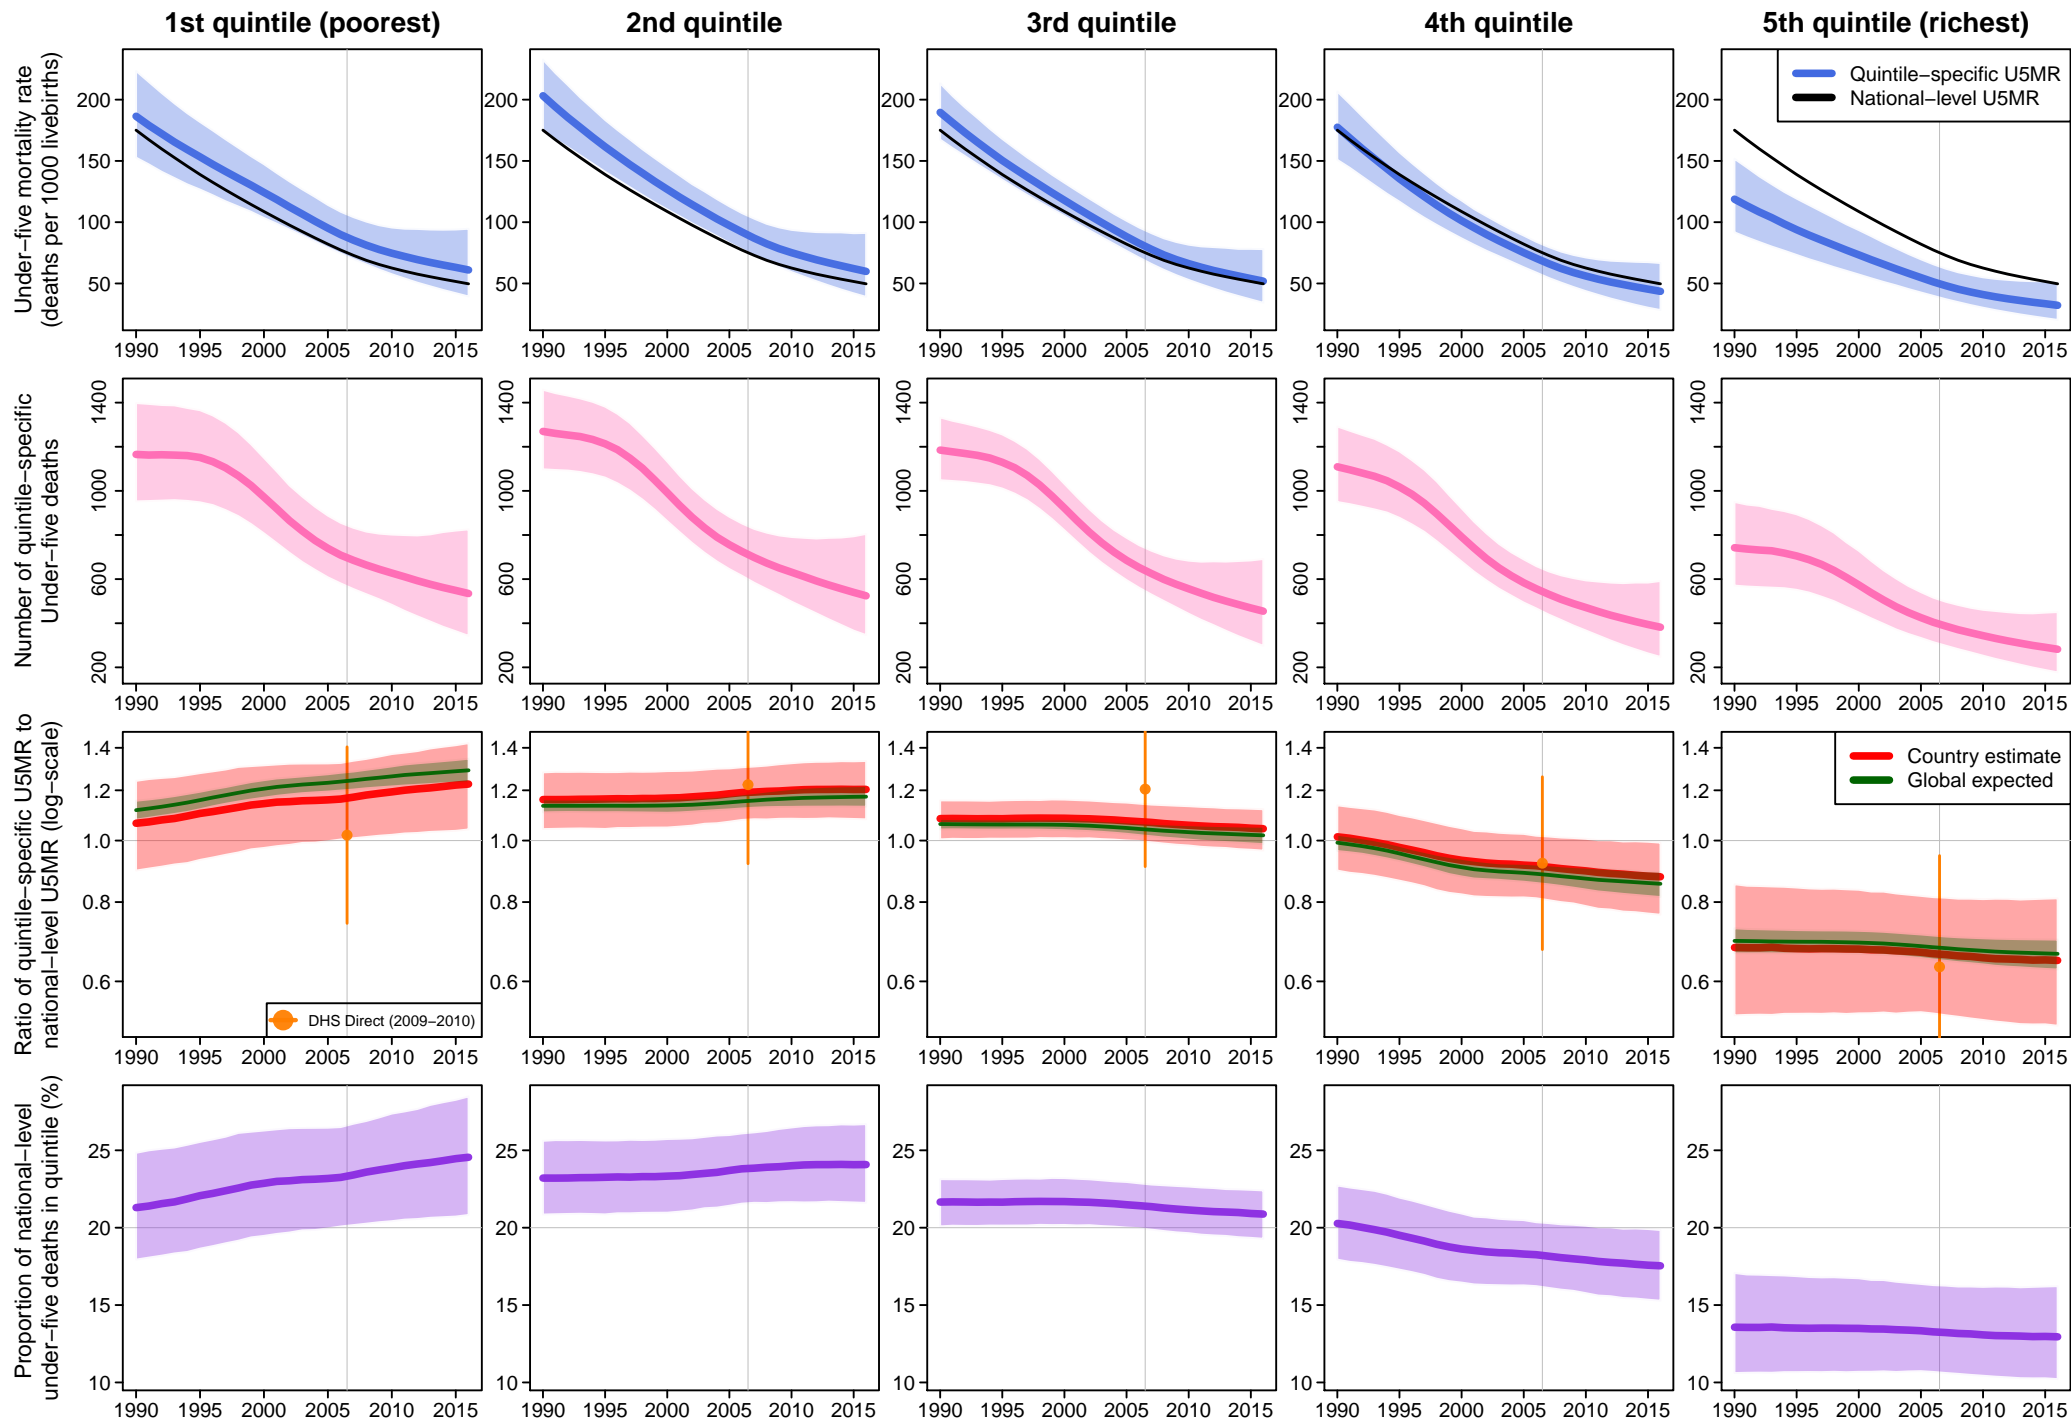

# Togo

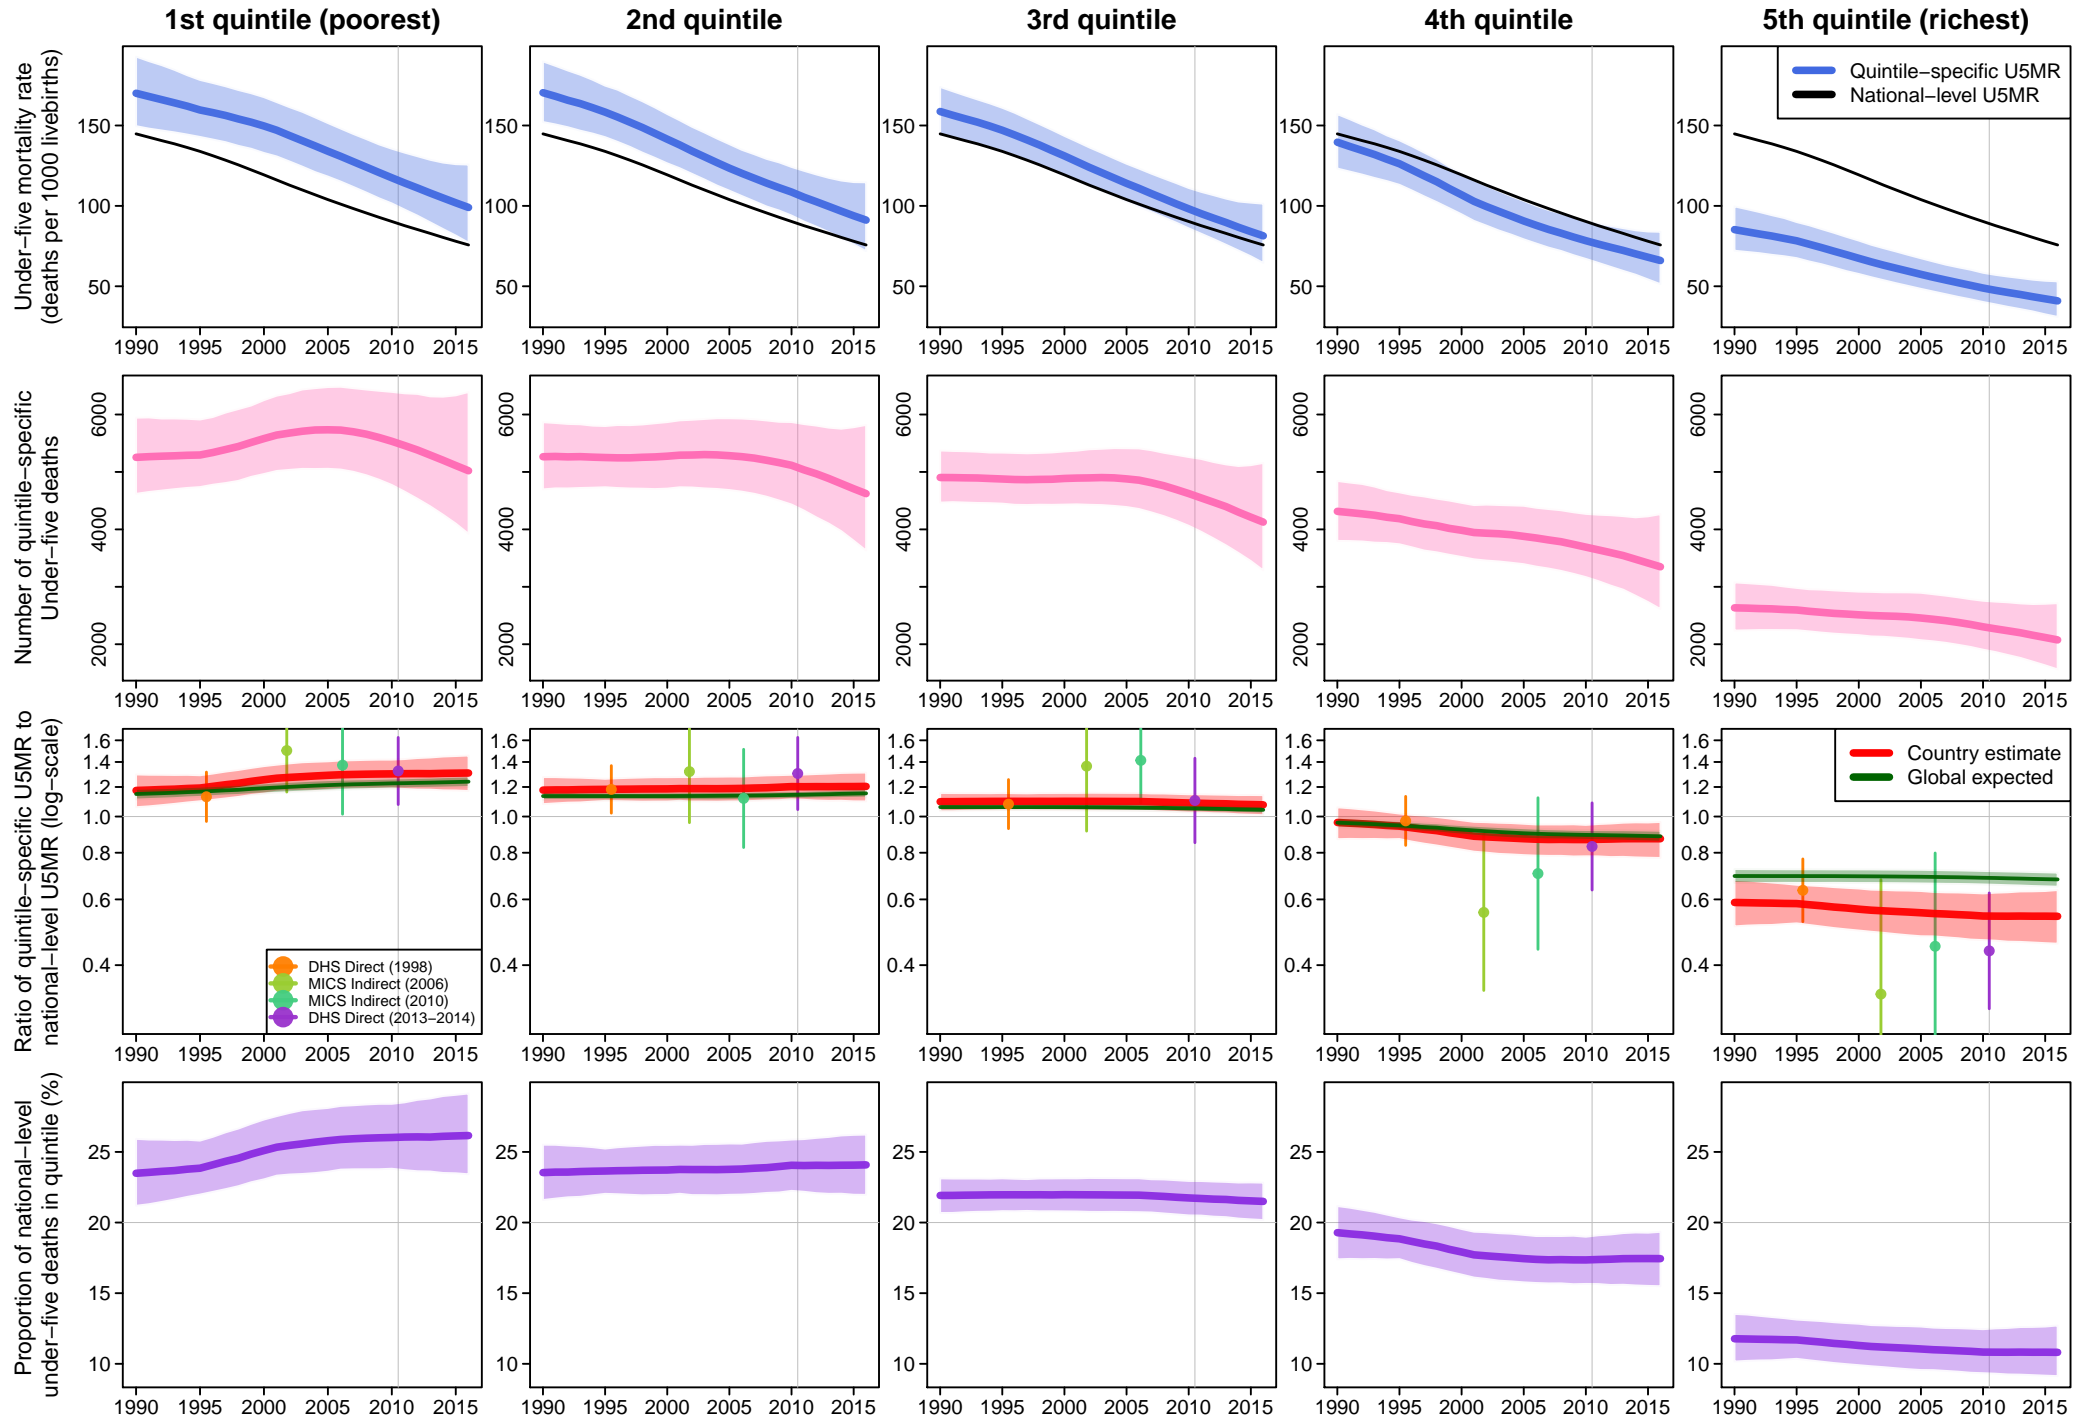

# Tunisia

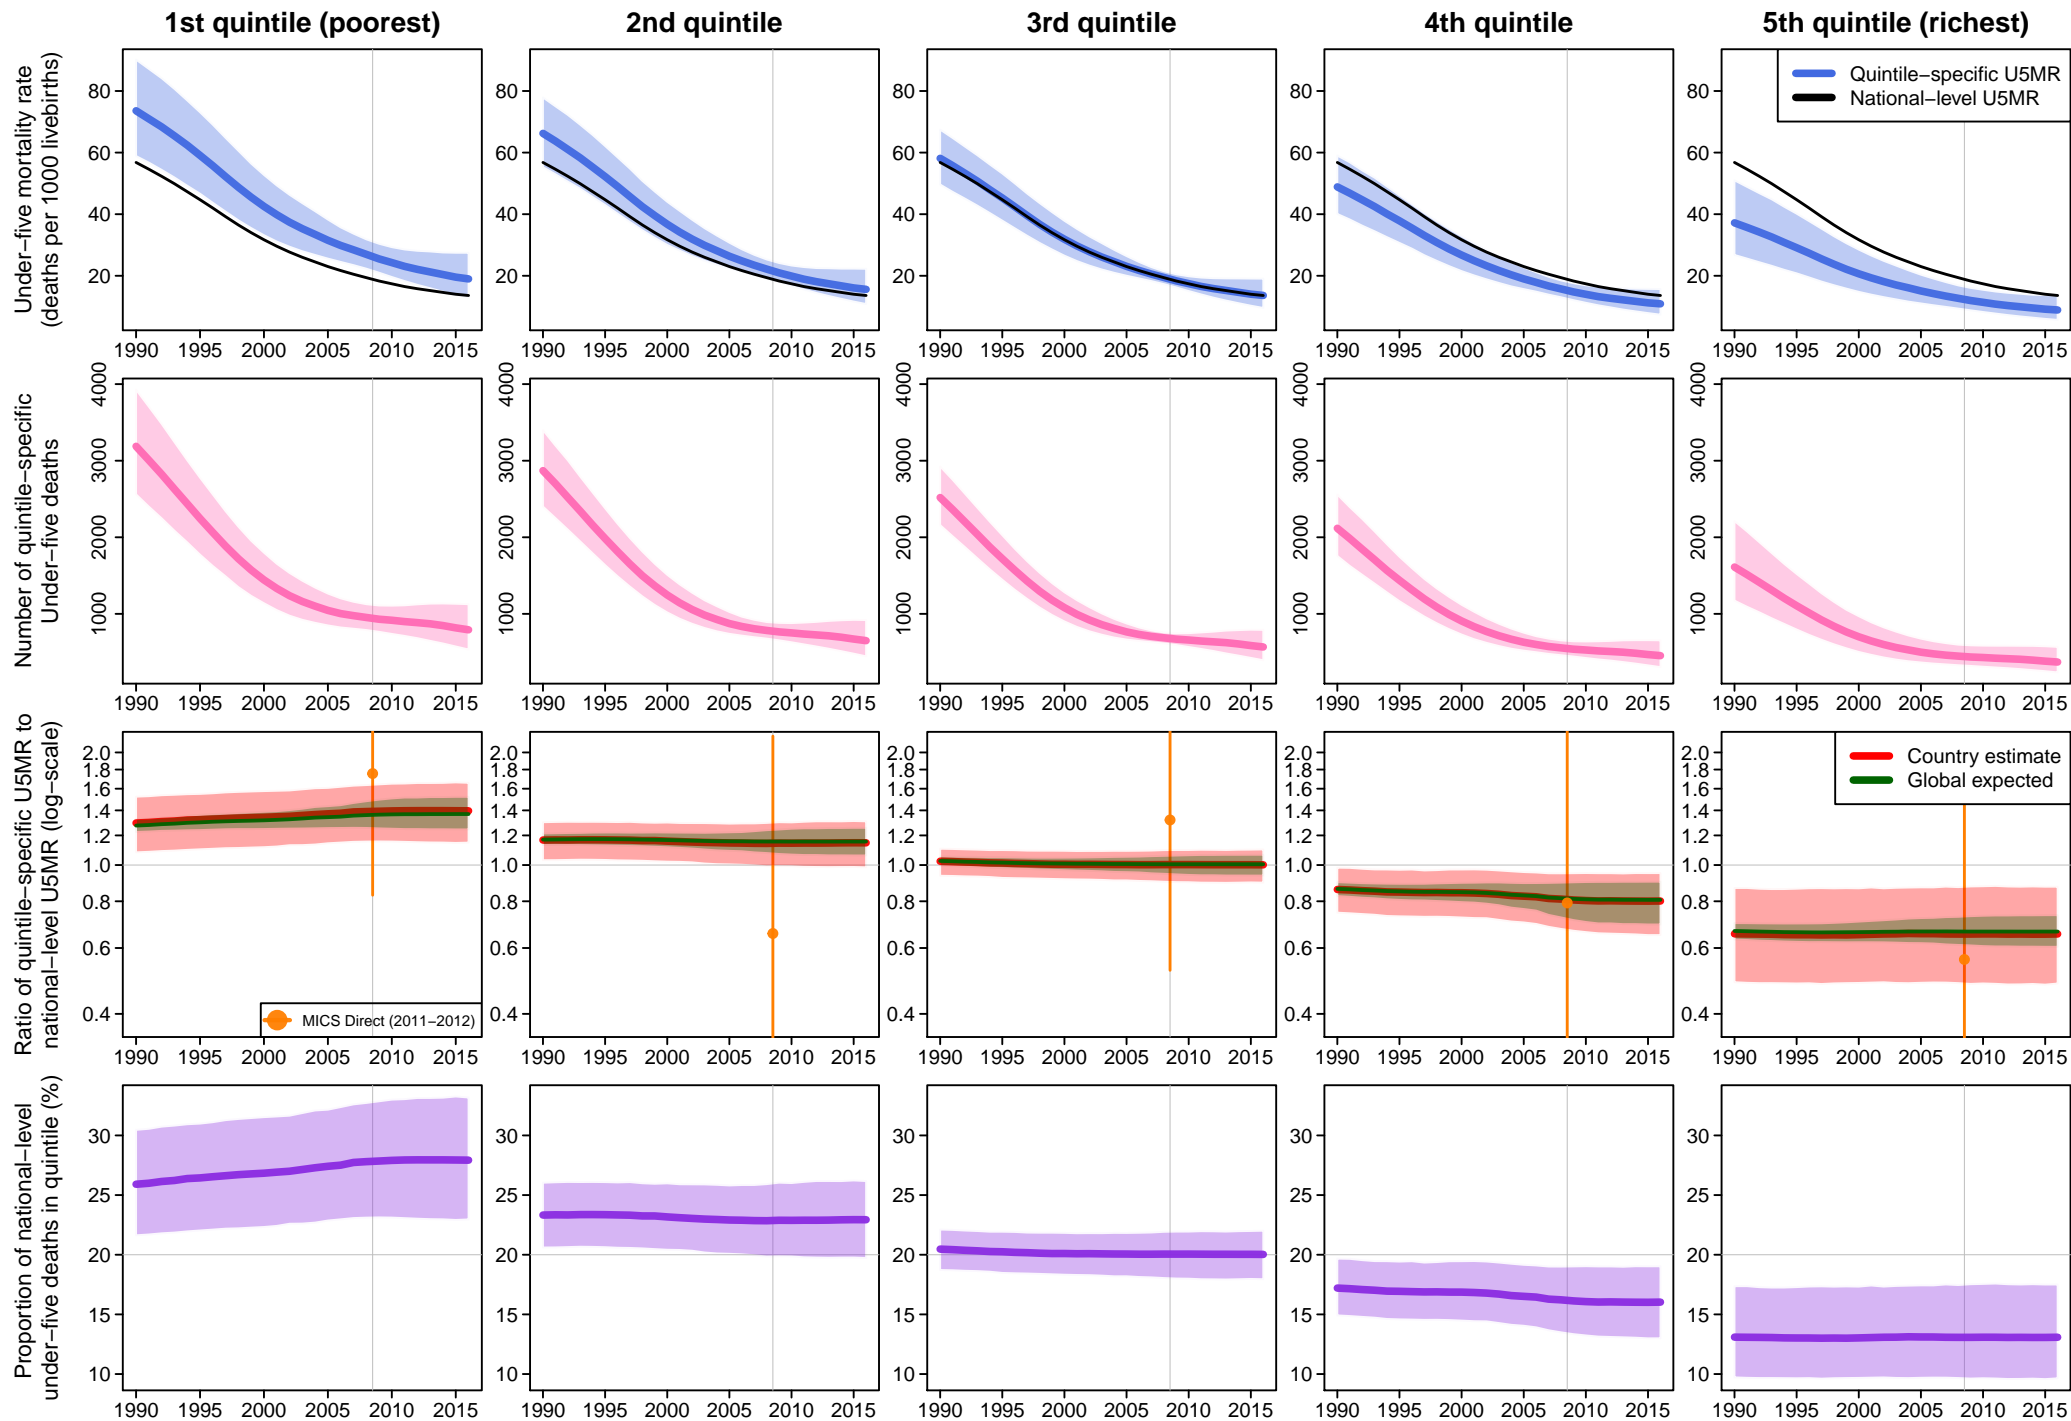

# Turkey

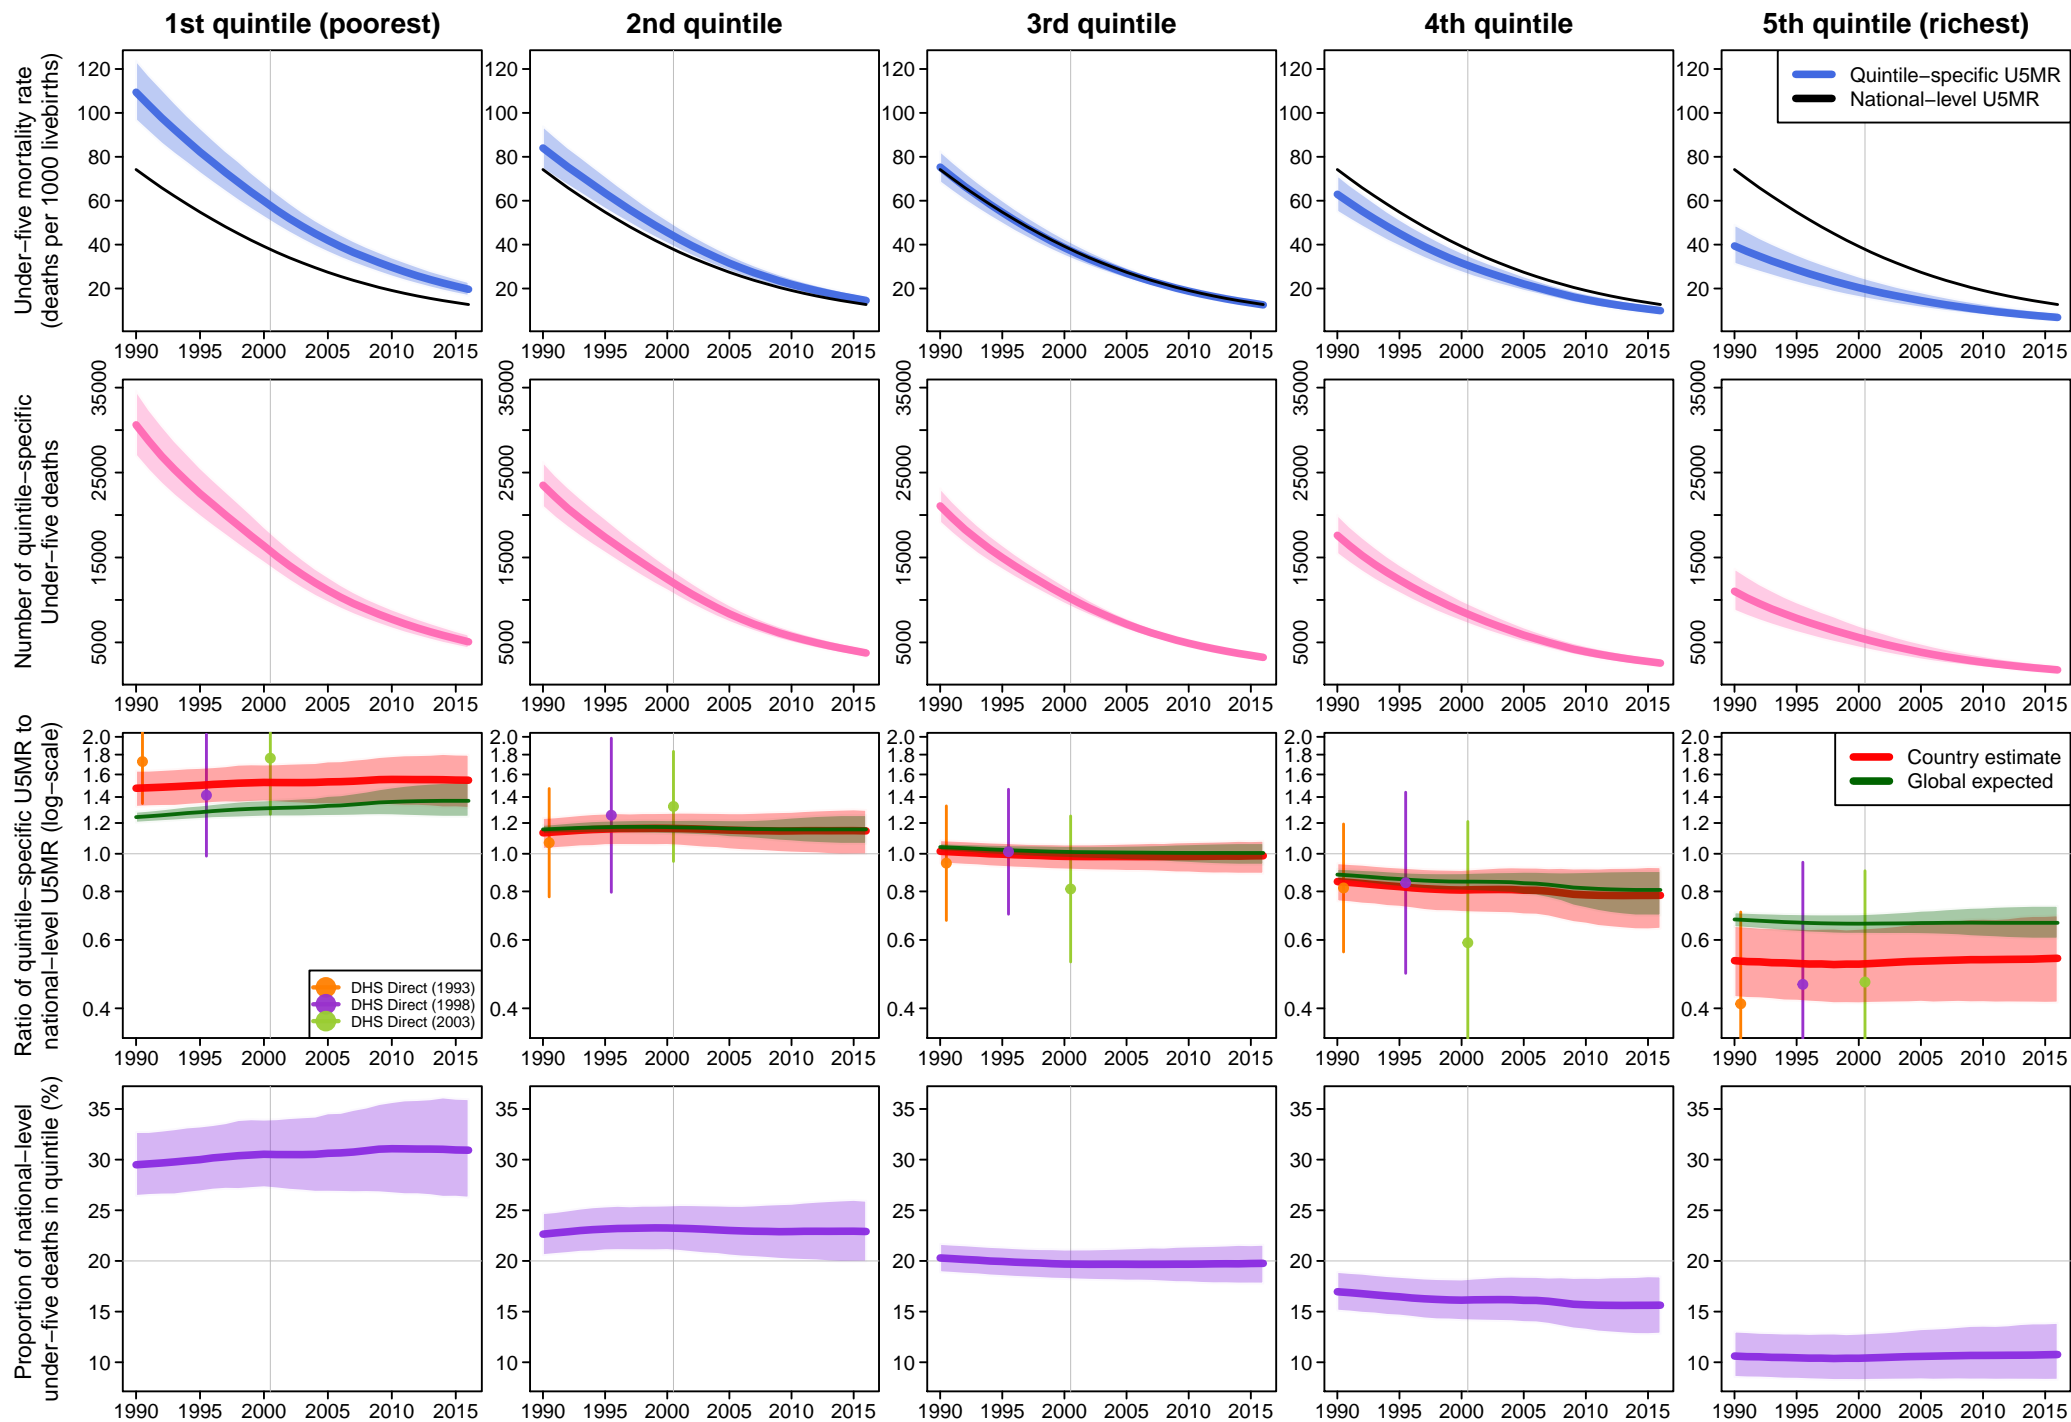

# Turkmenistan

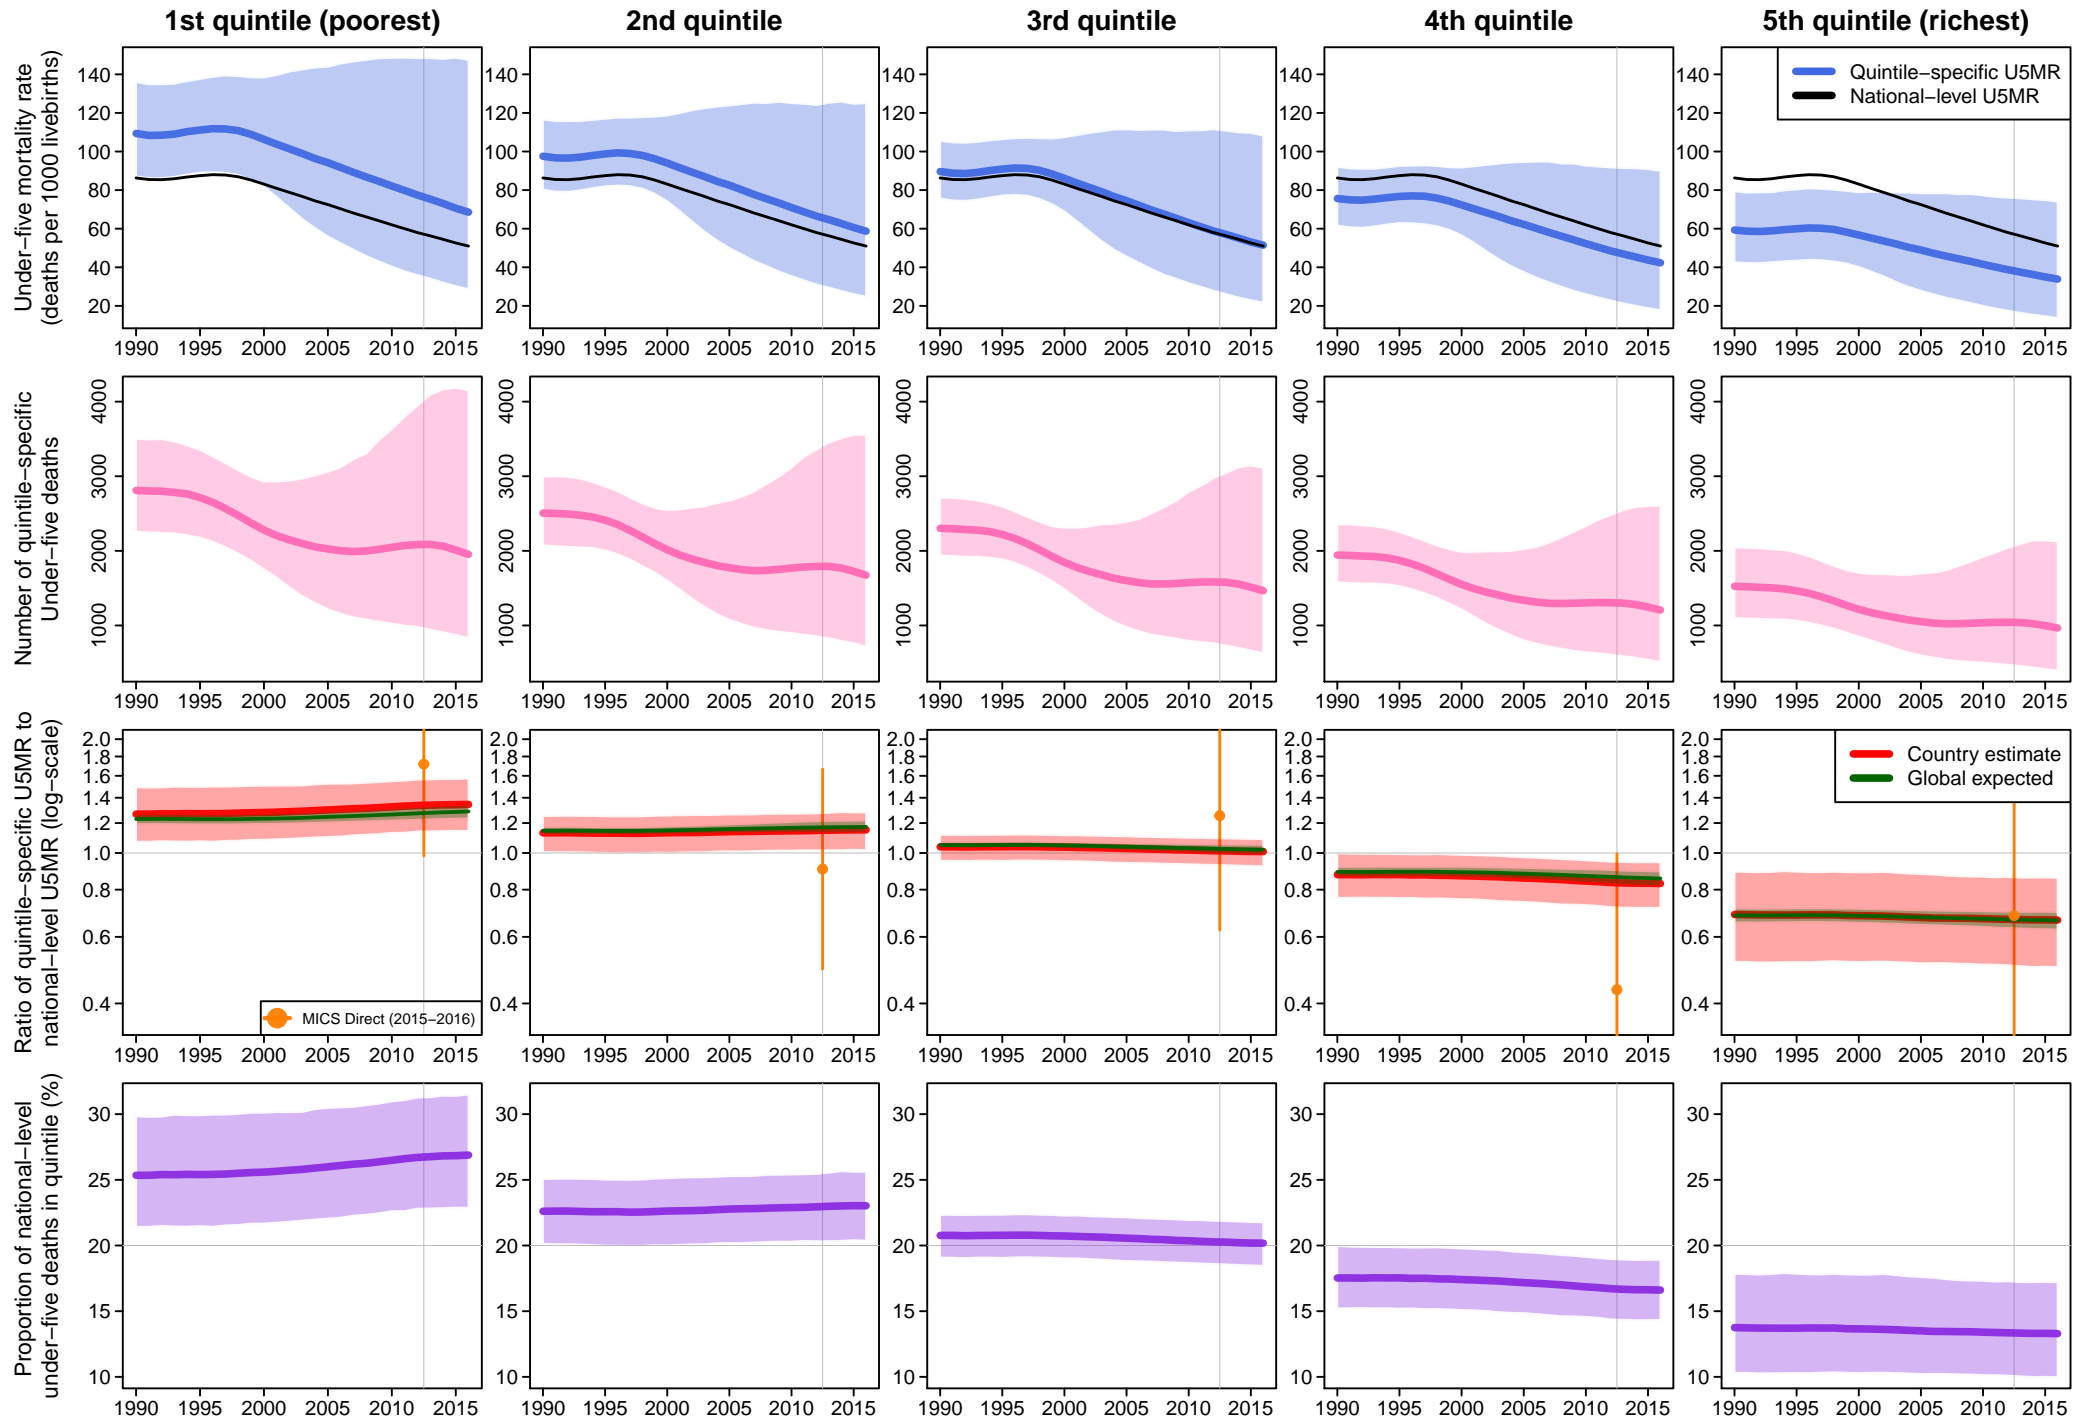

# Uganda

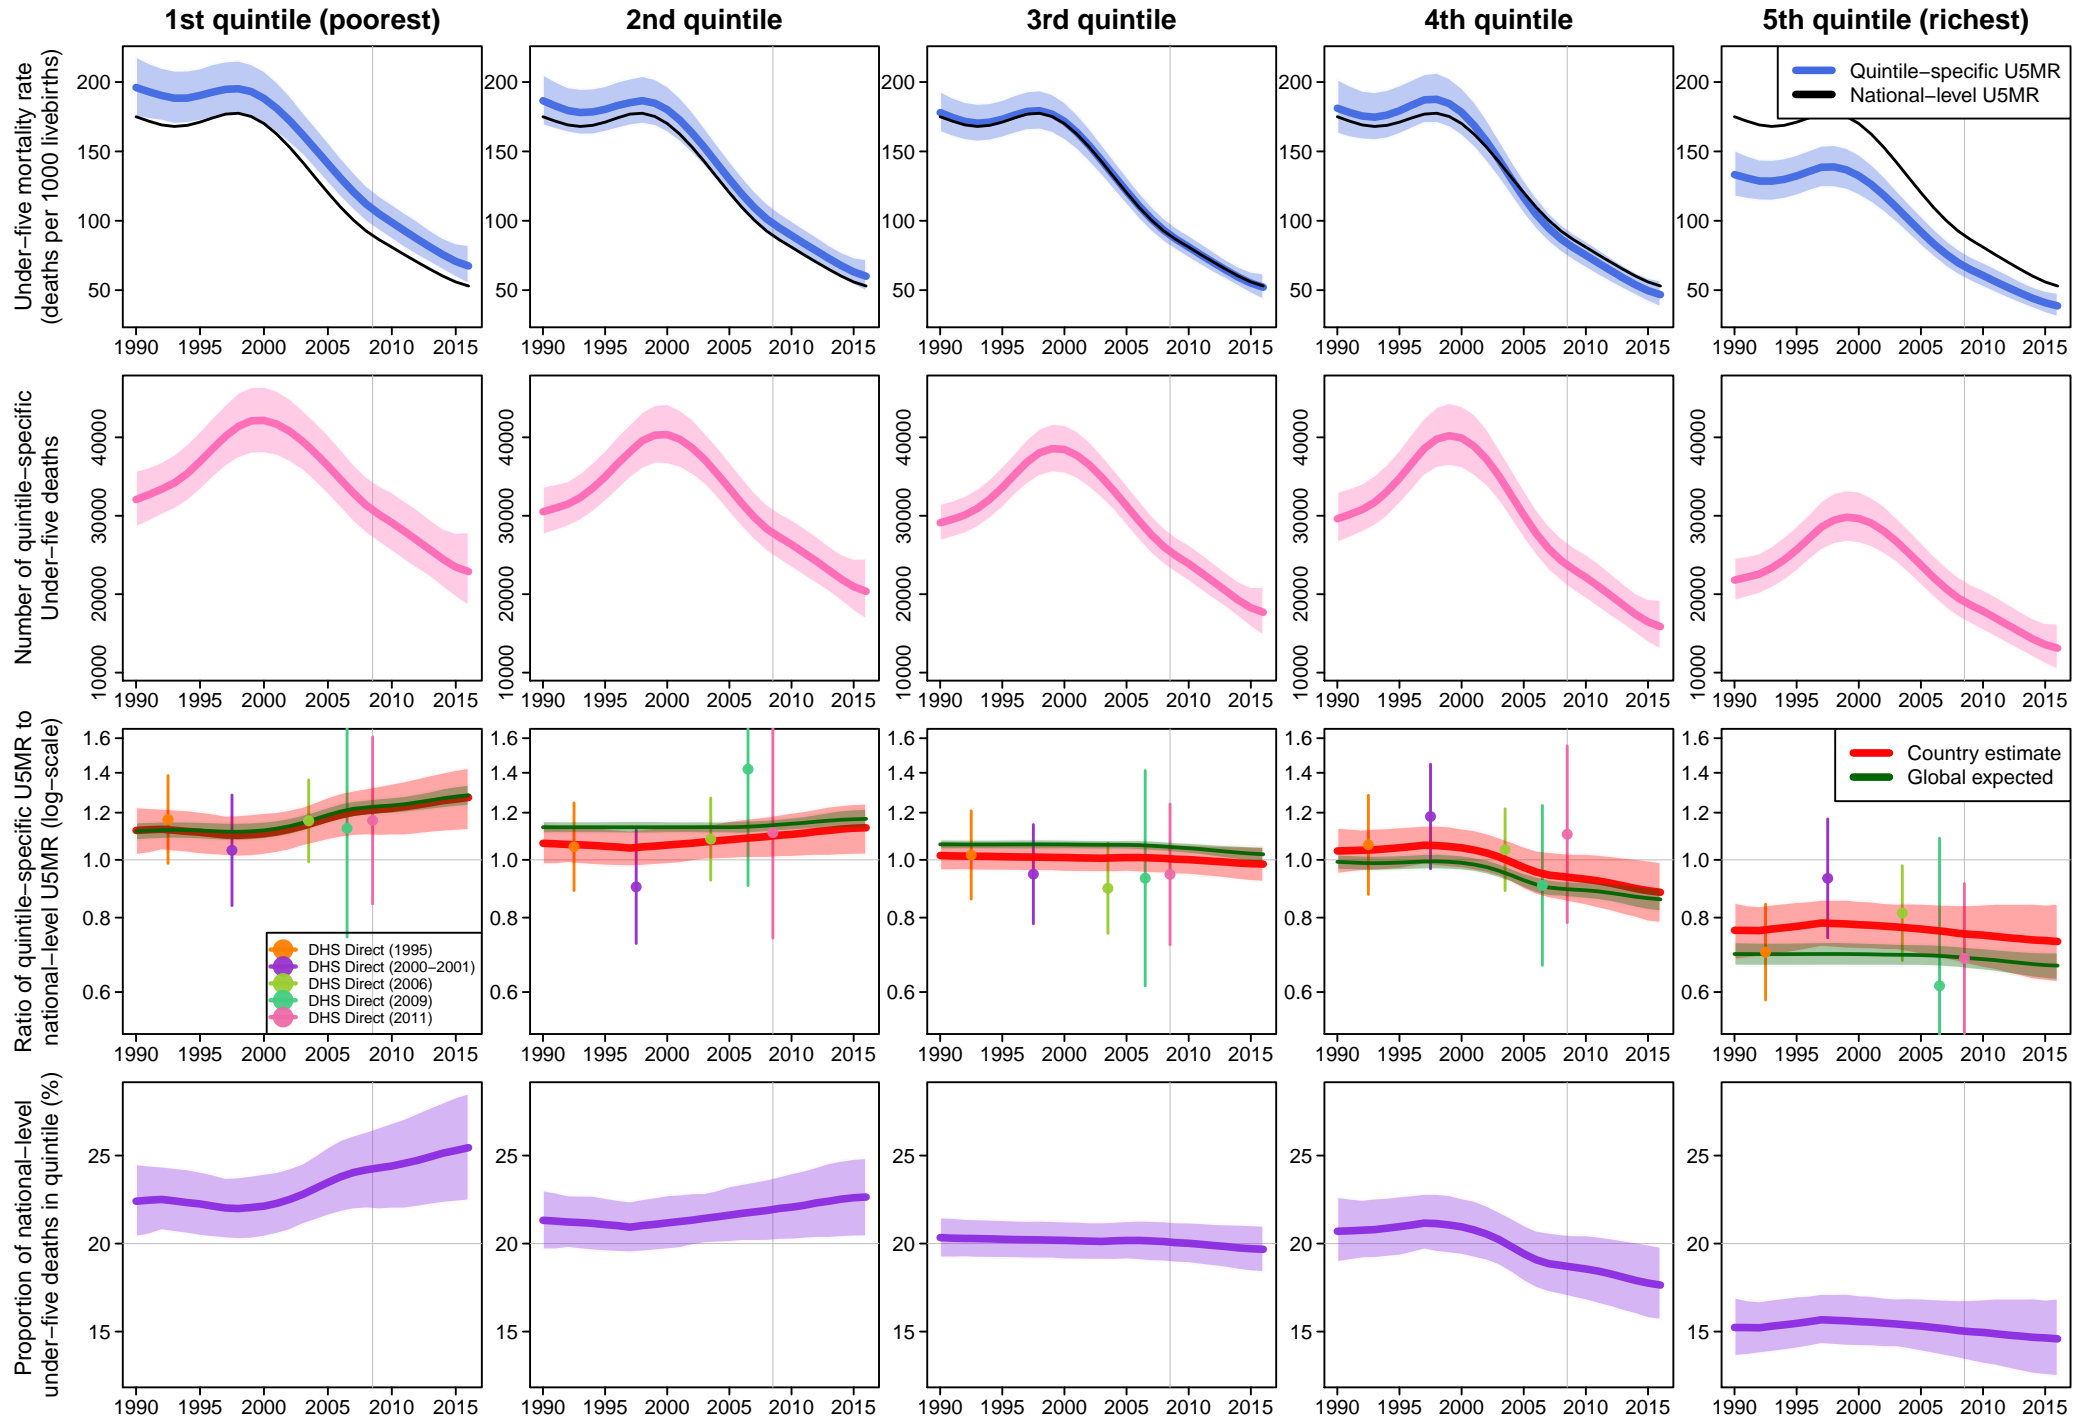



# Ukraine

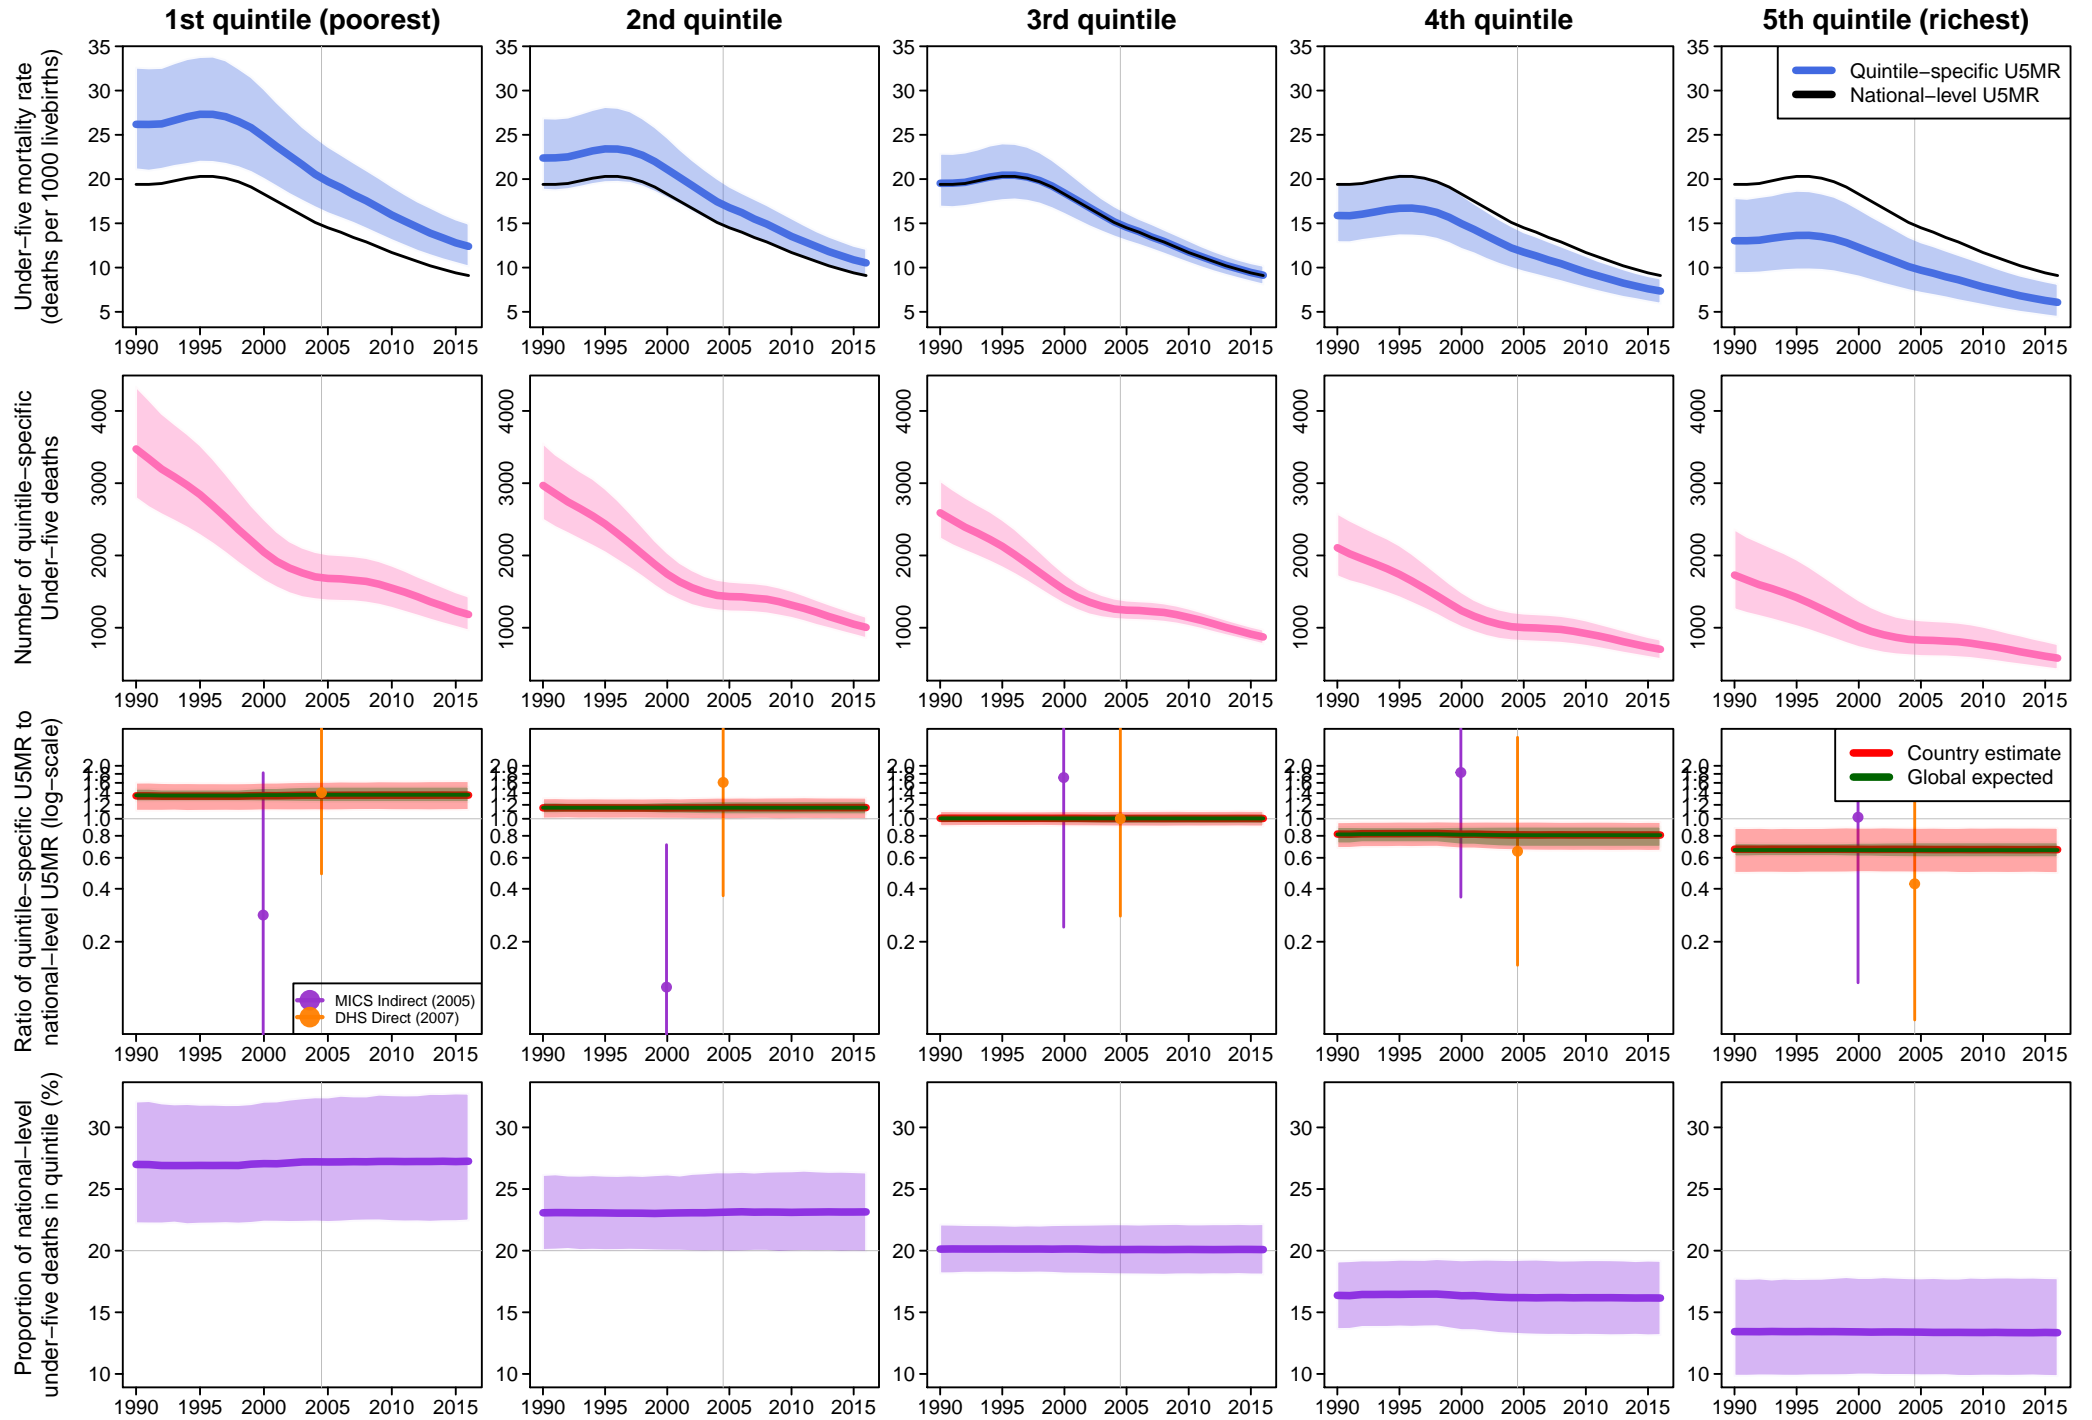

# United Republic of Tanzania

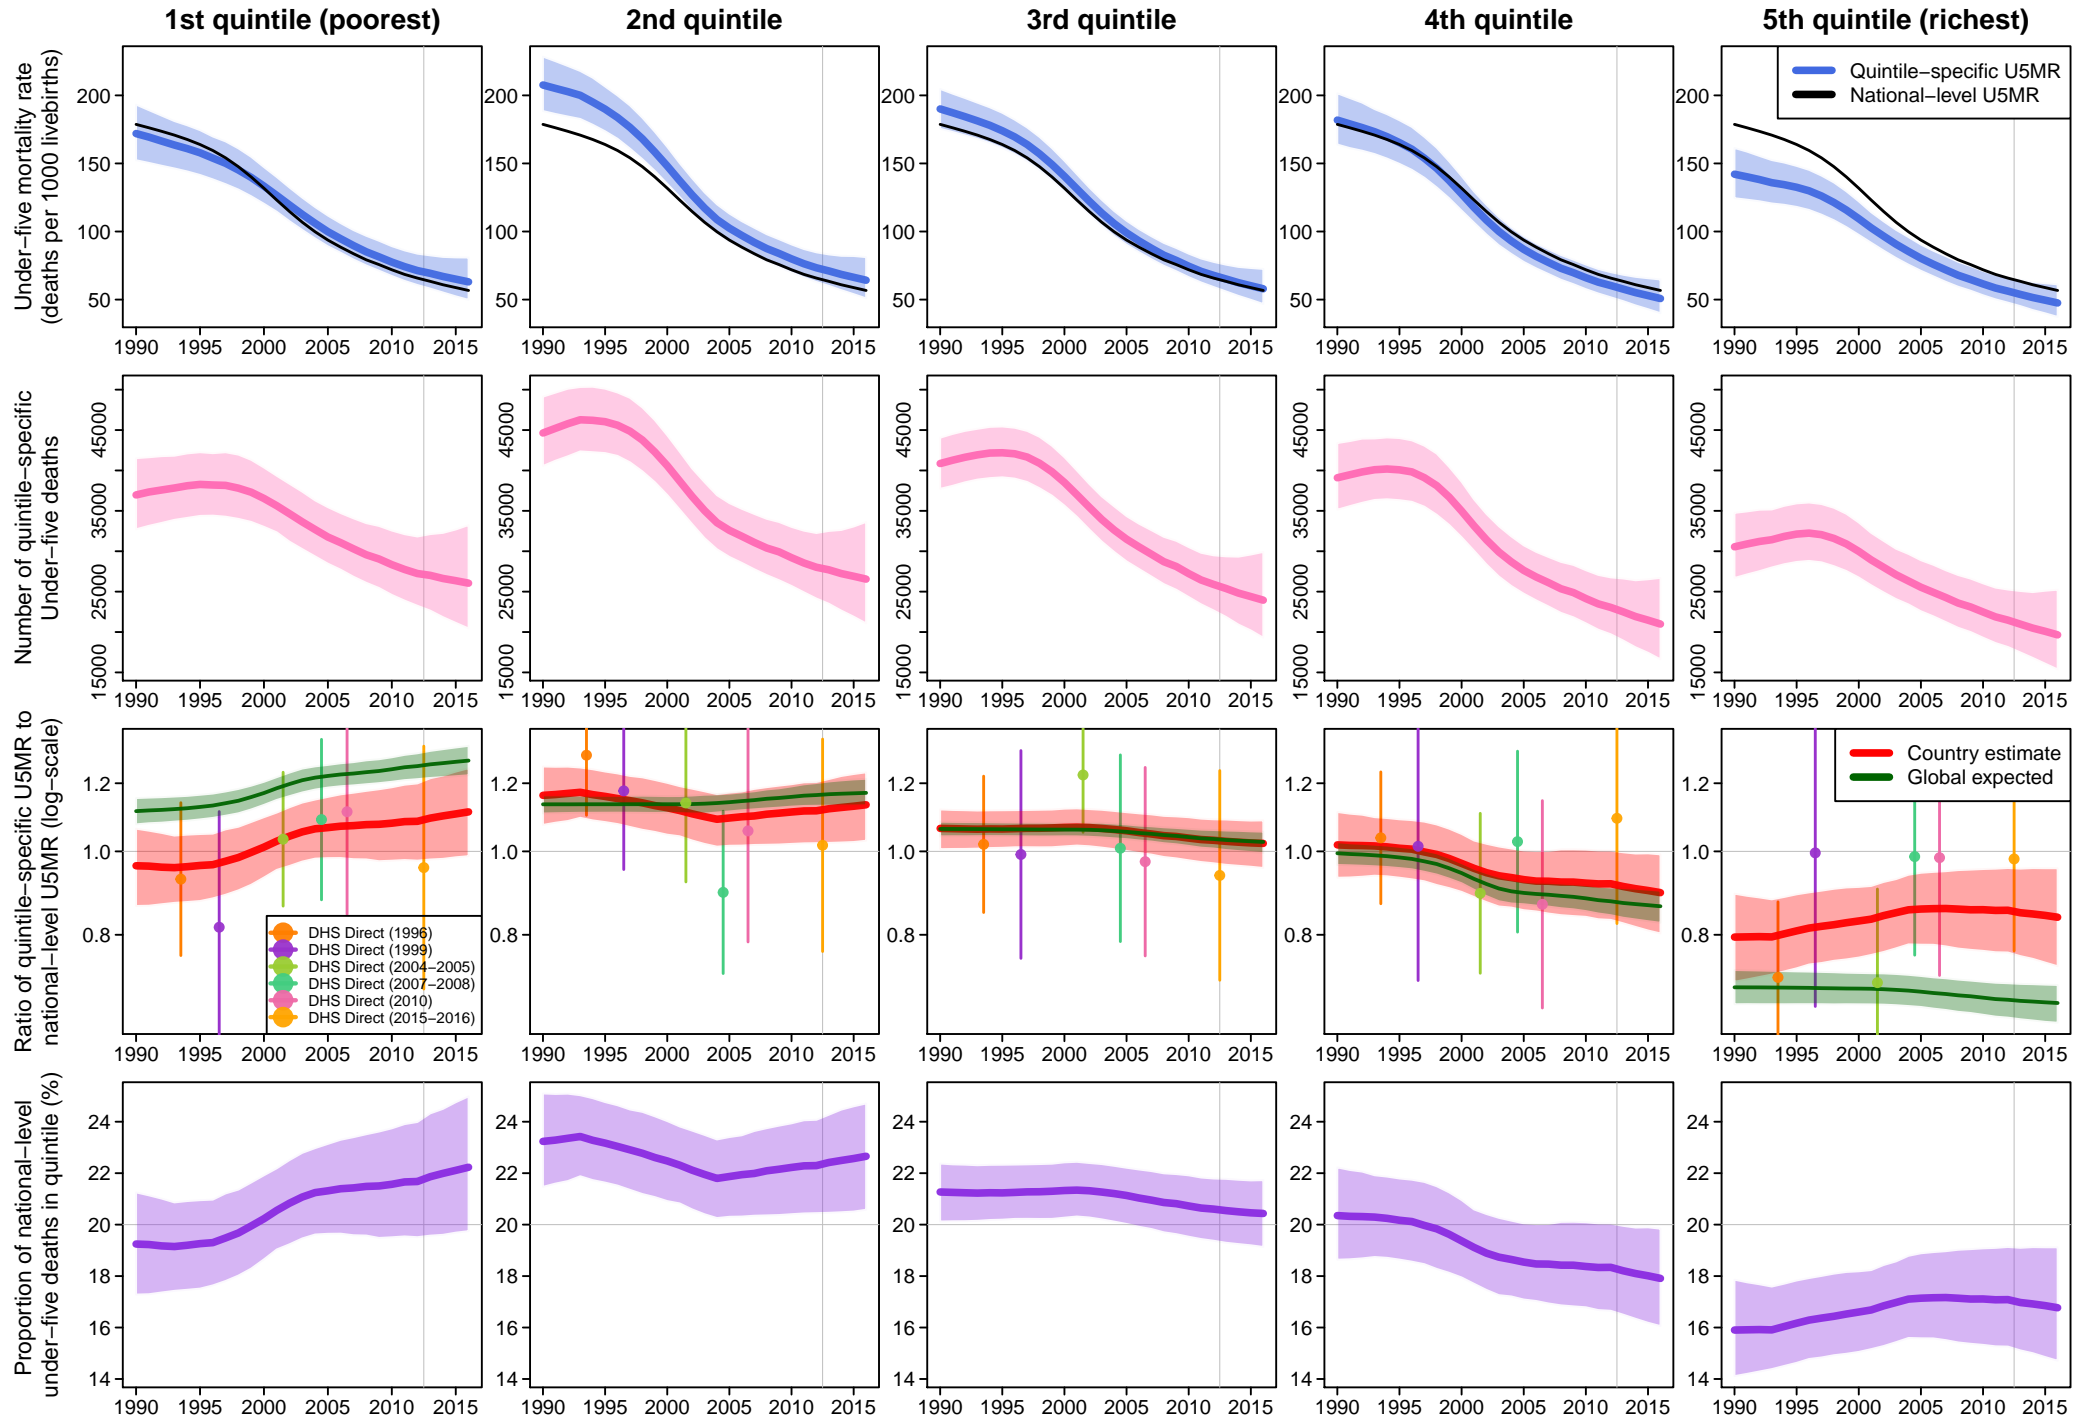

# Uzbekistan

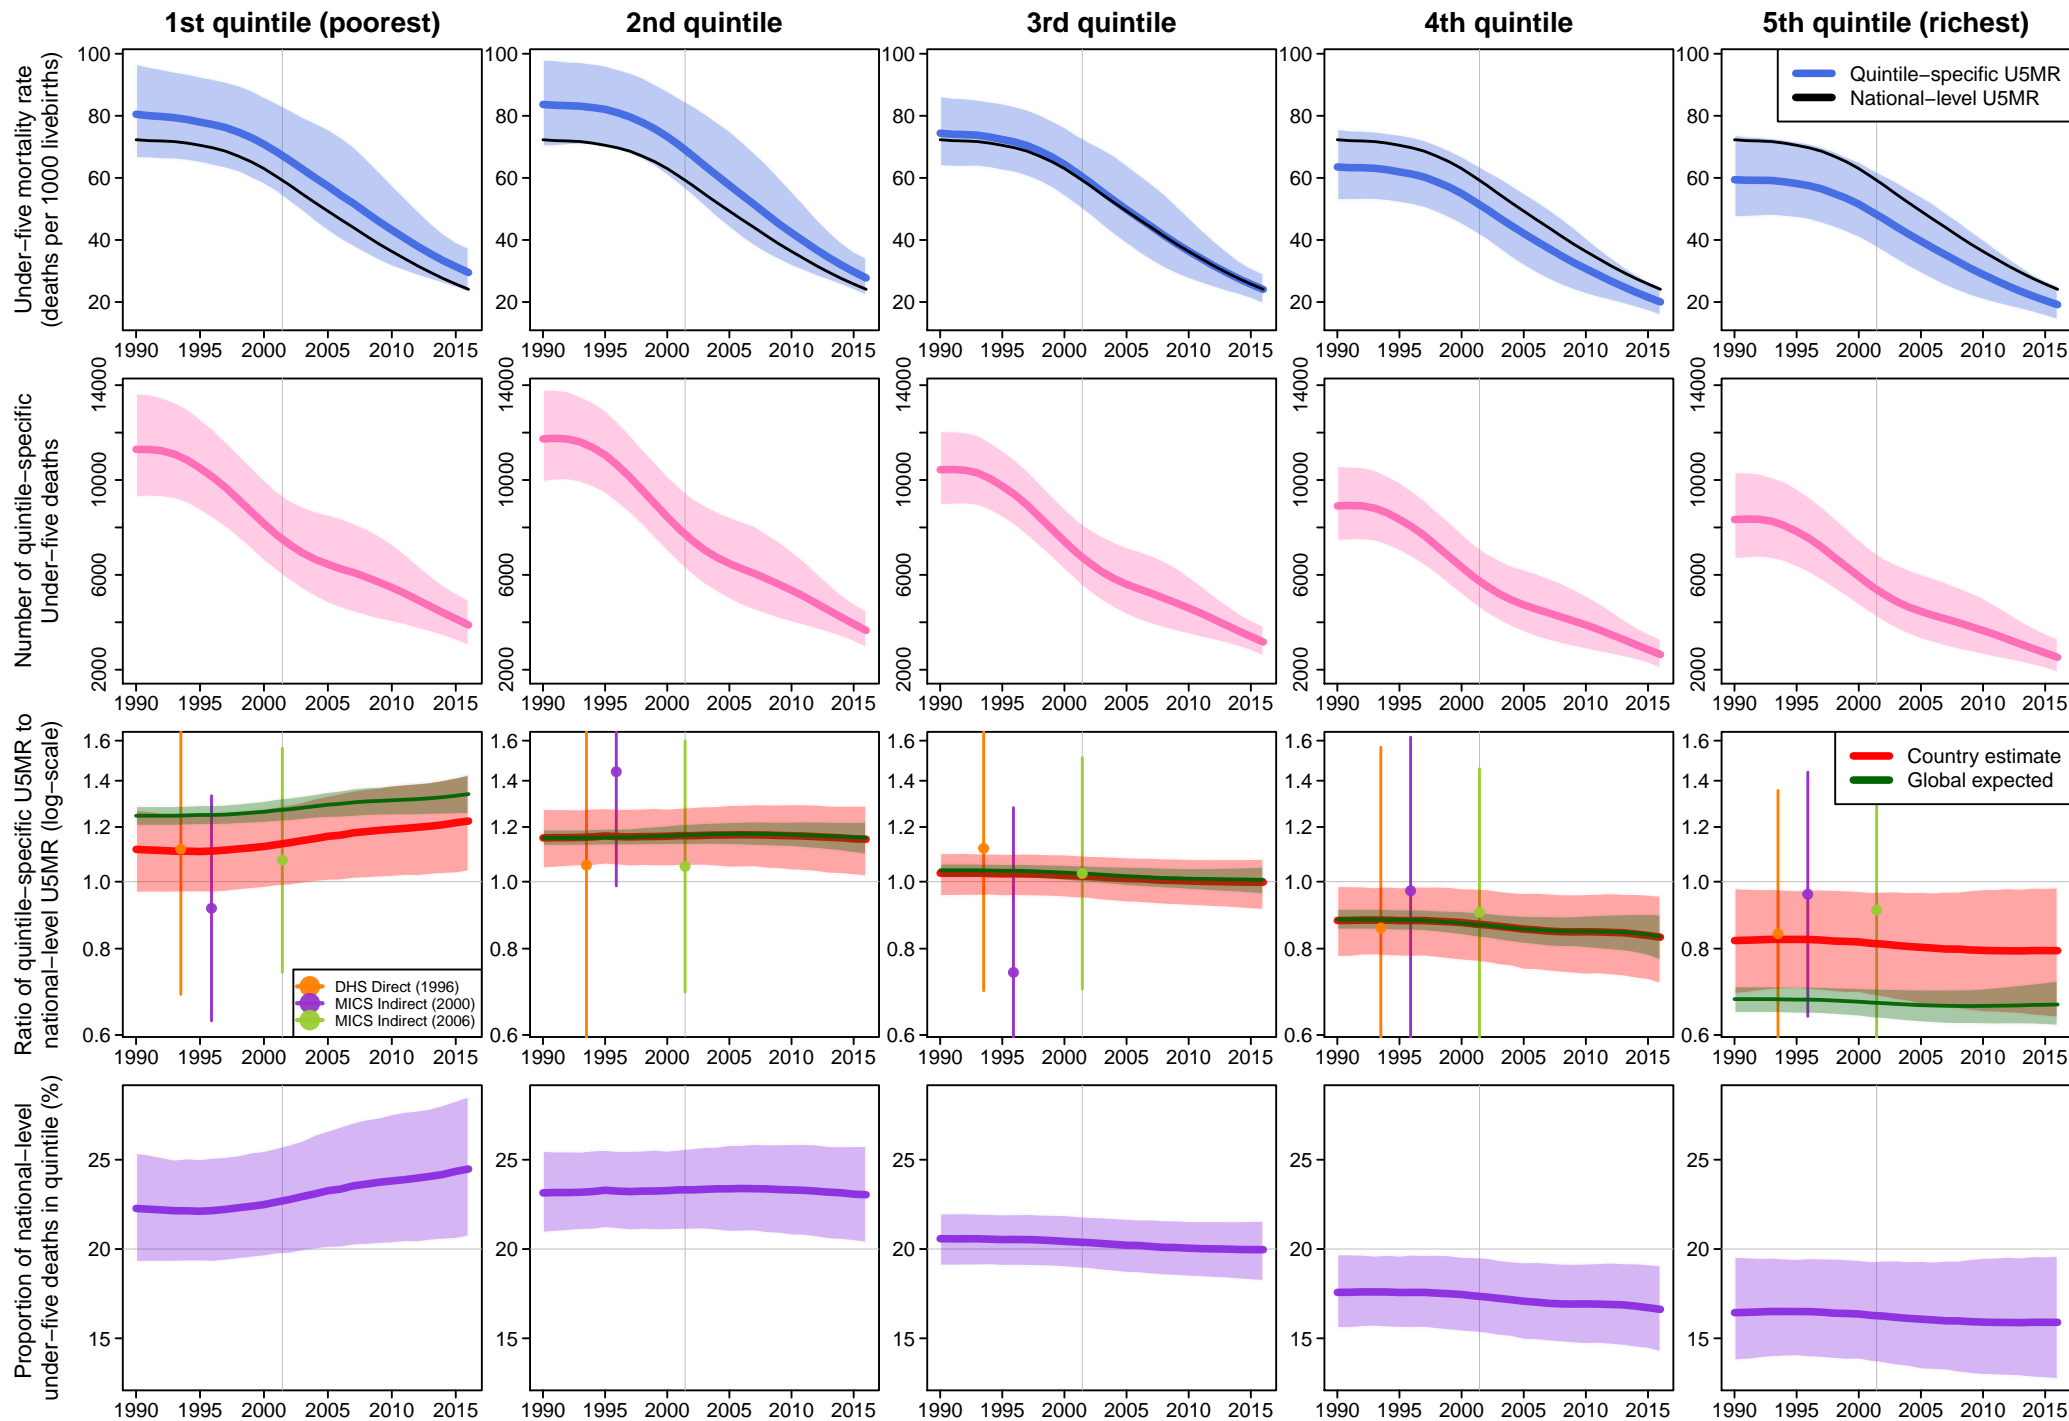

# Vanuatu

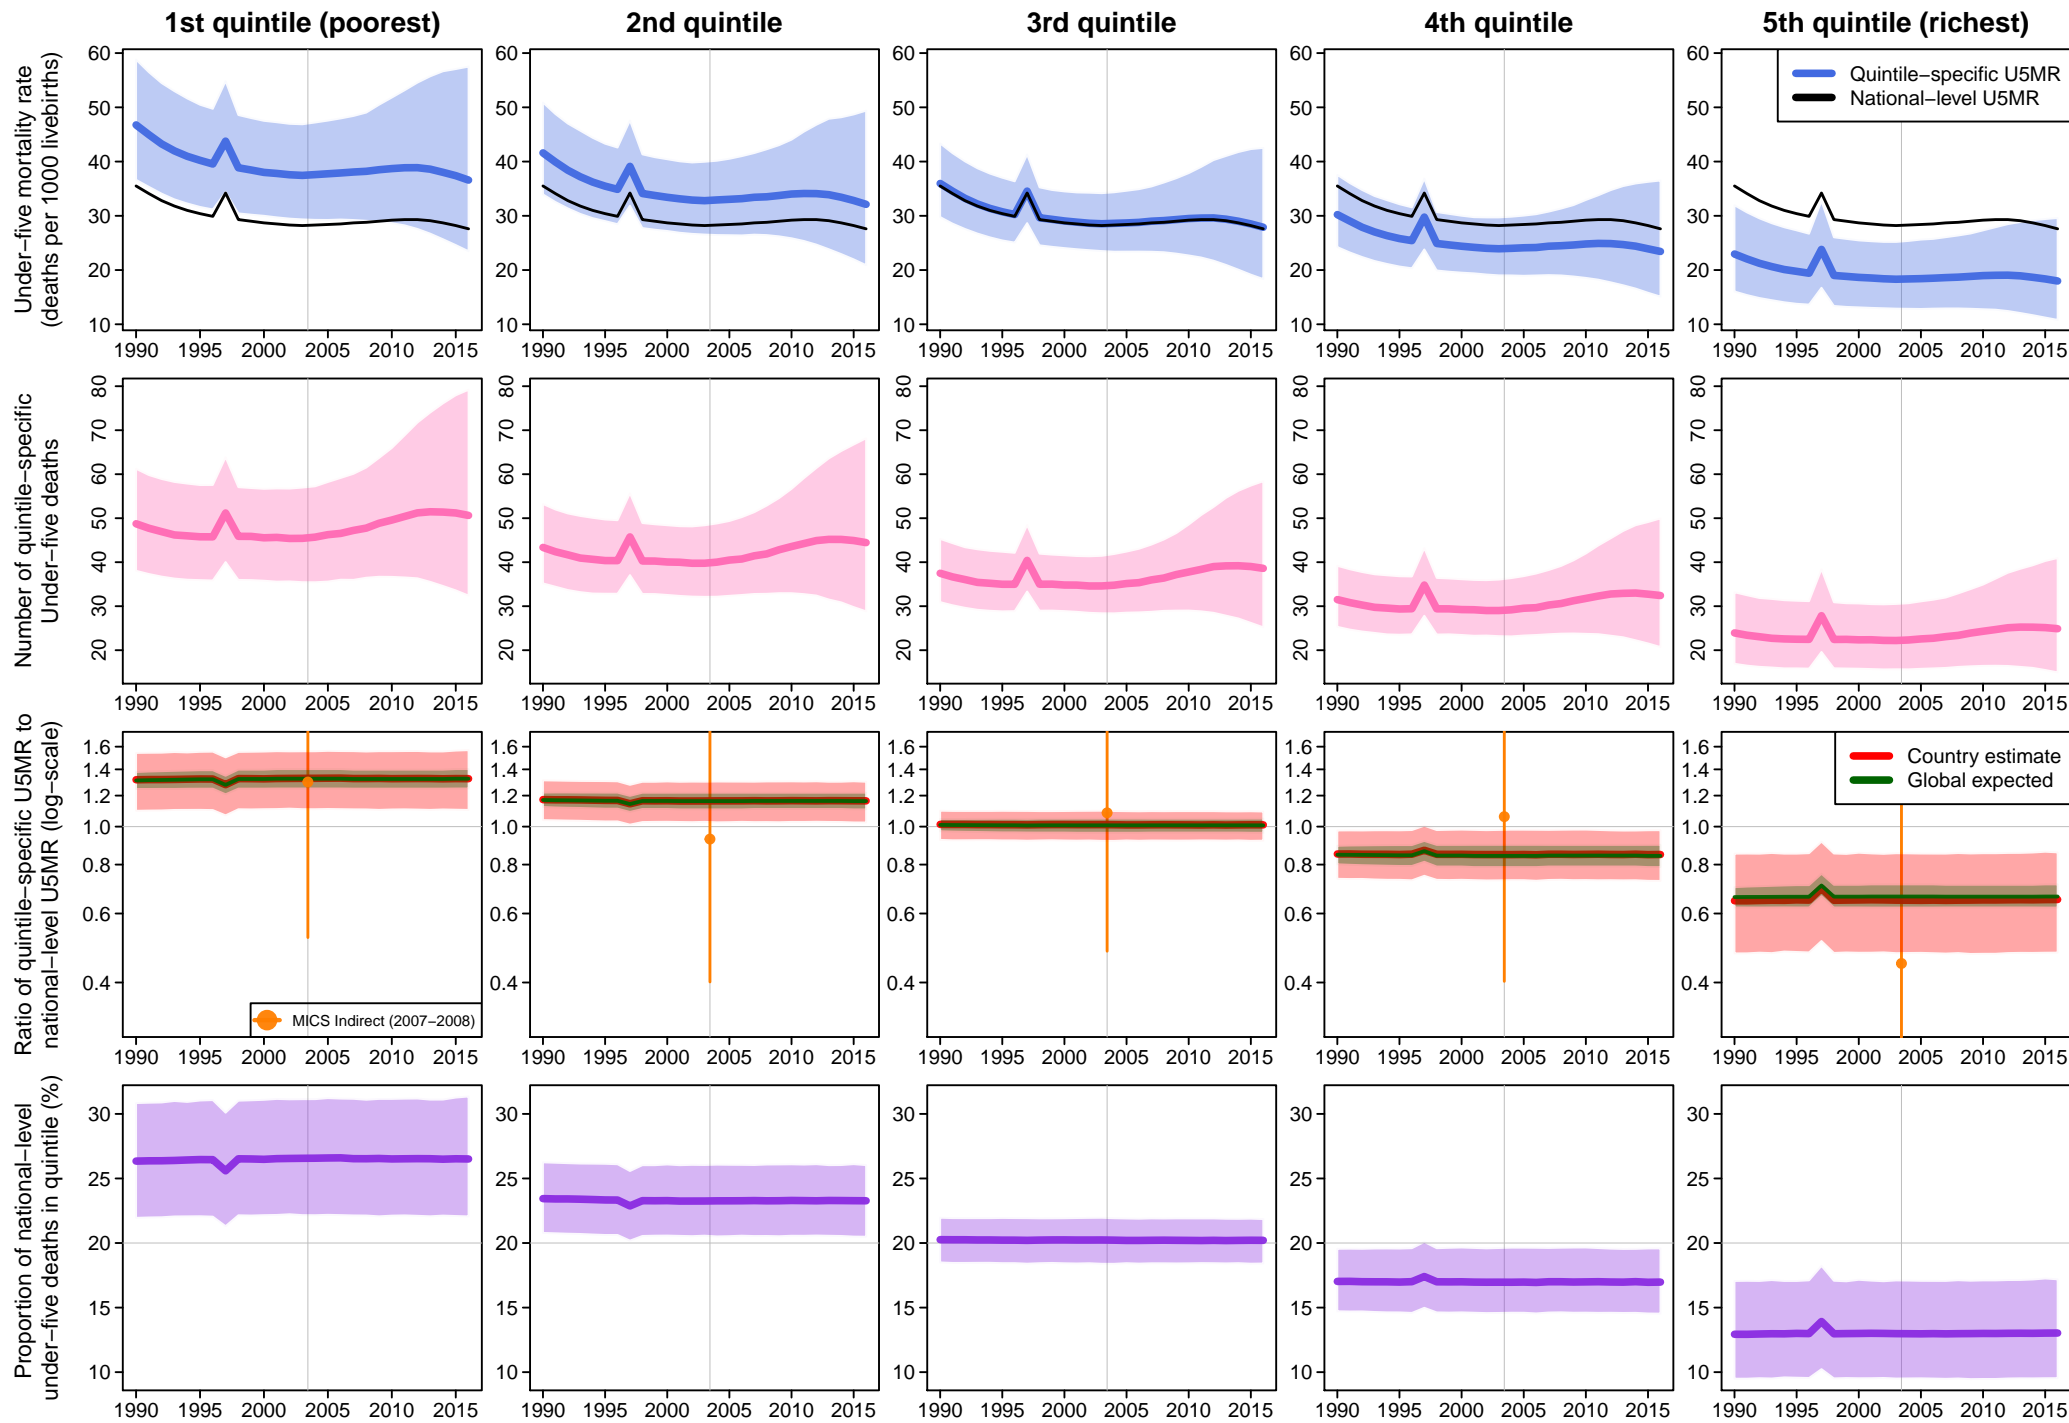

# Viet Nam

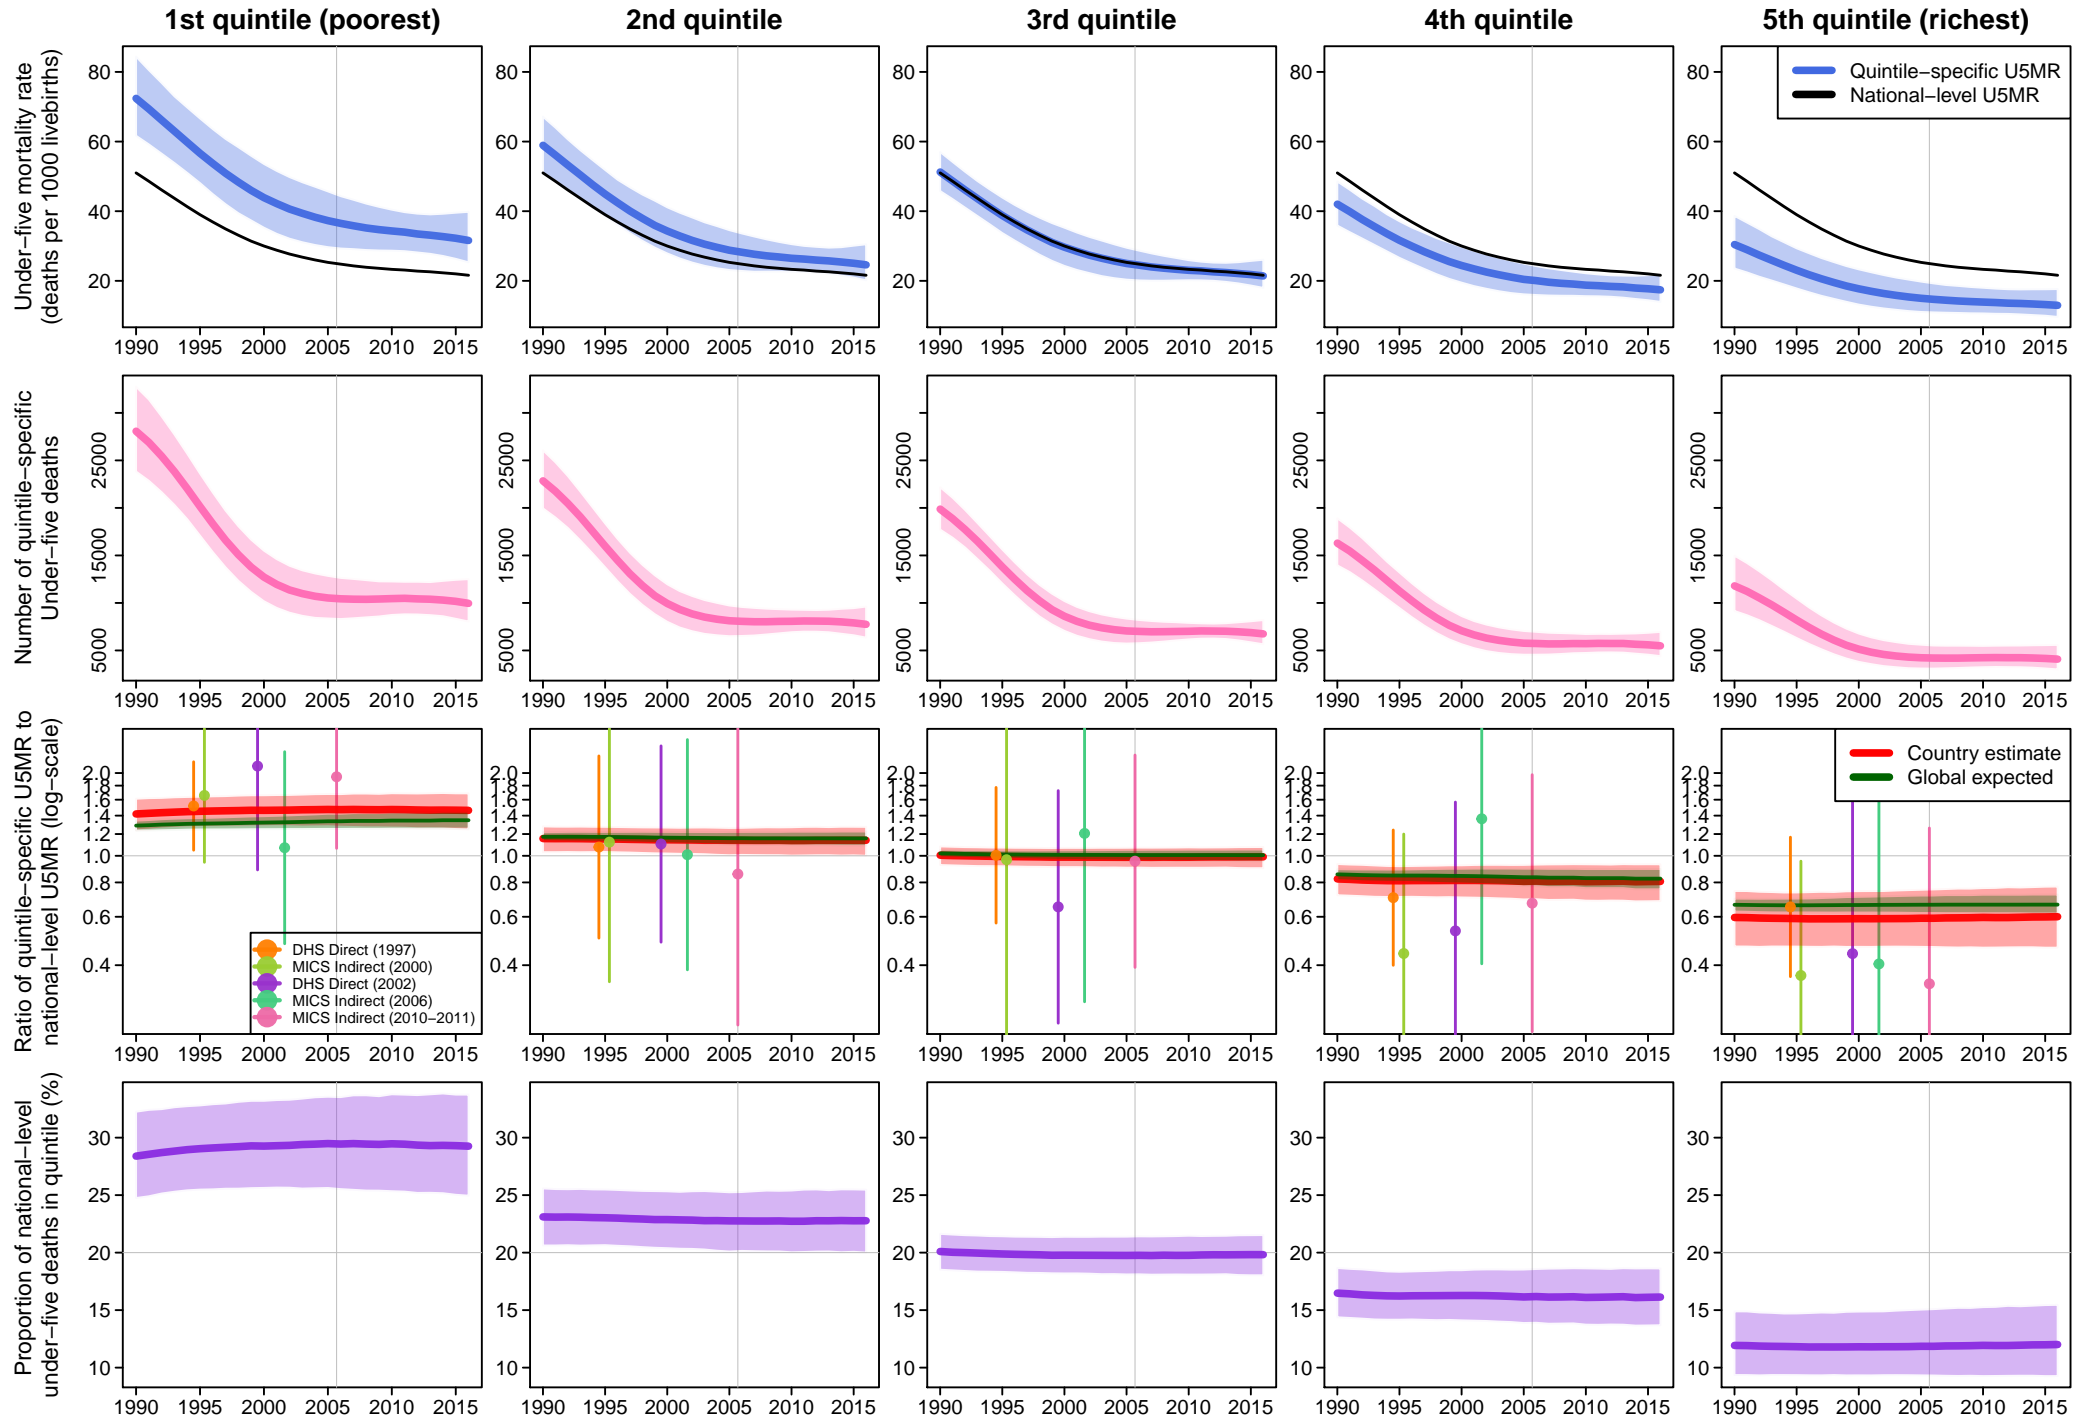

# Yemen

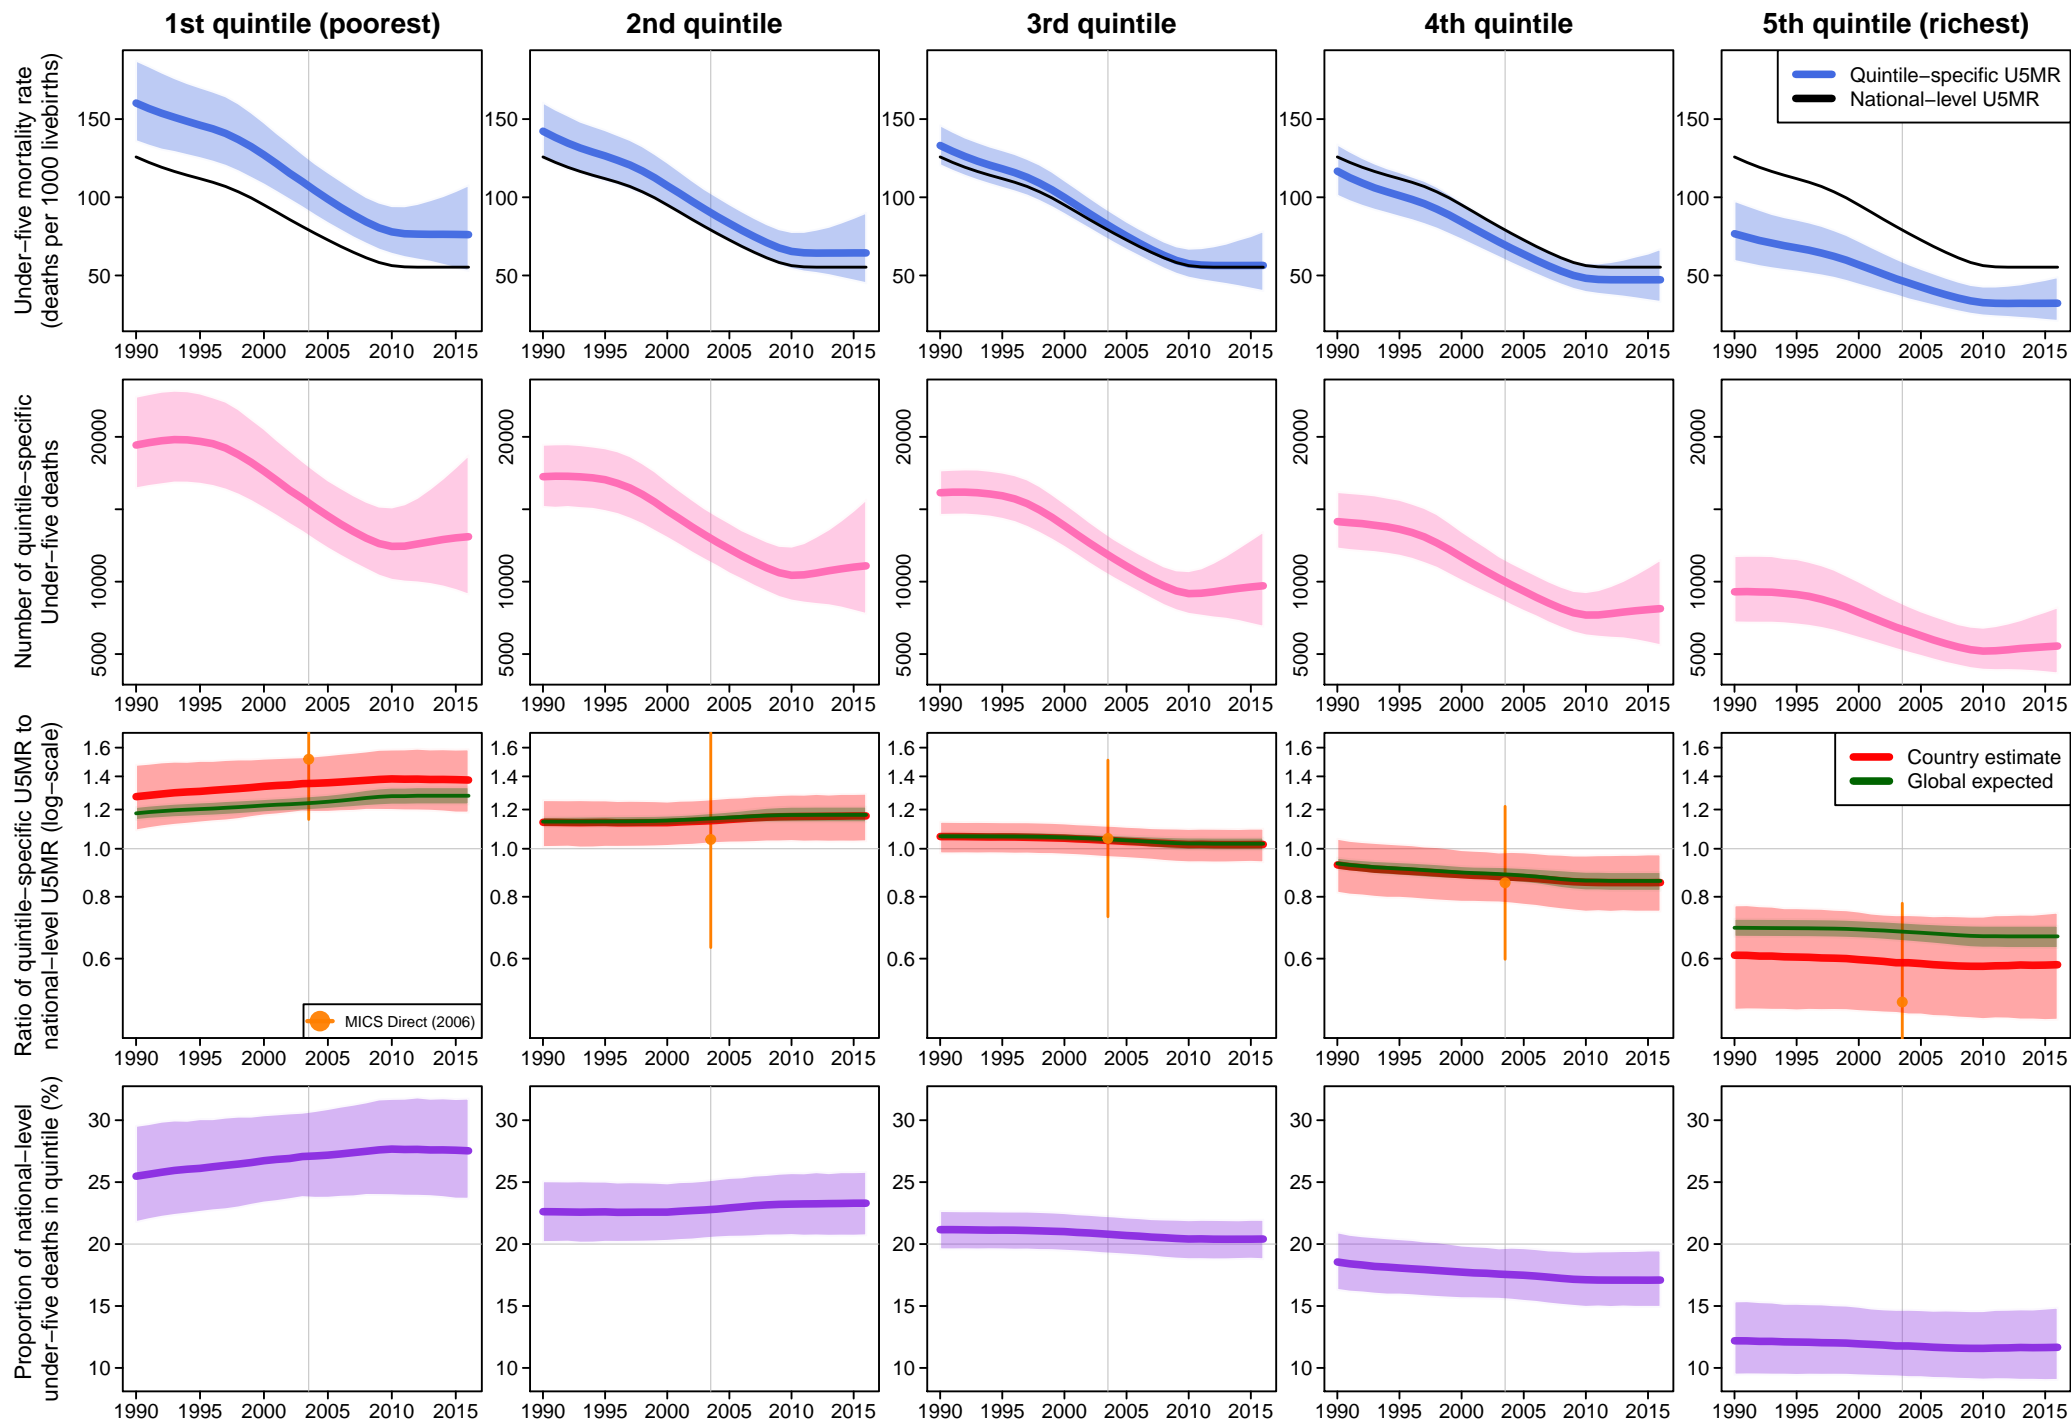

# Zambia

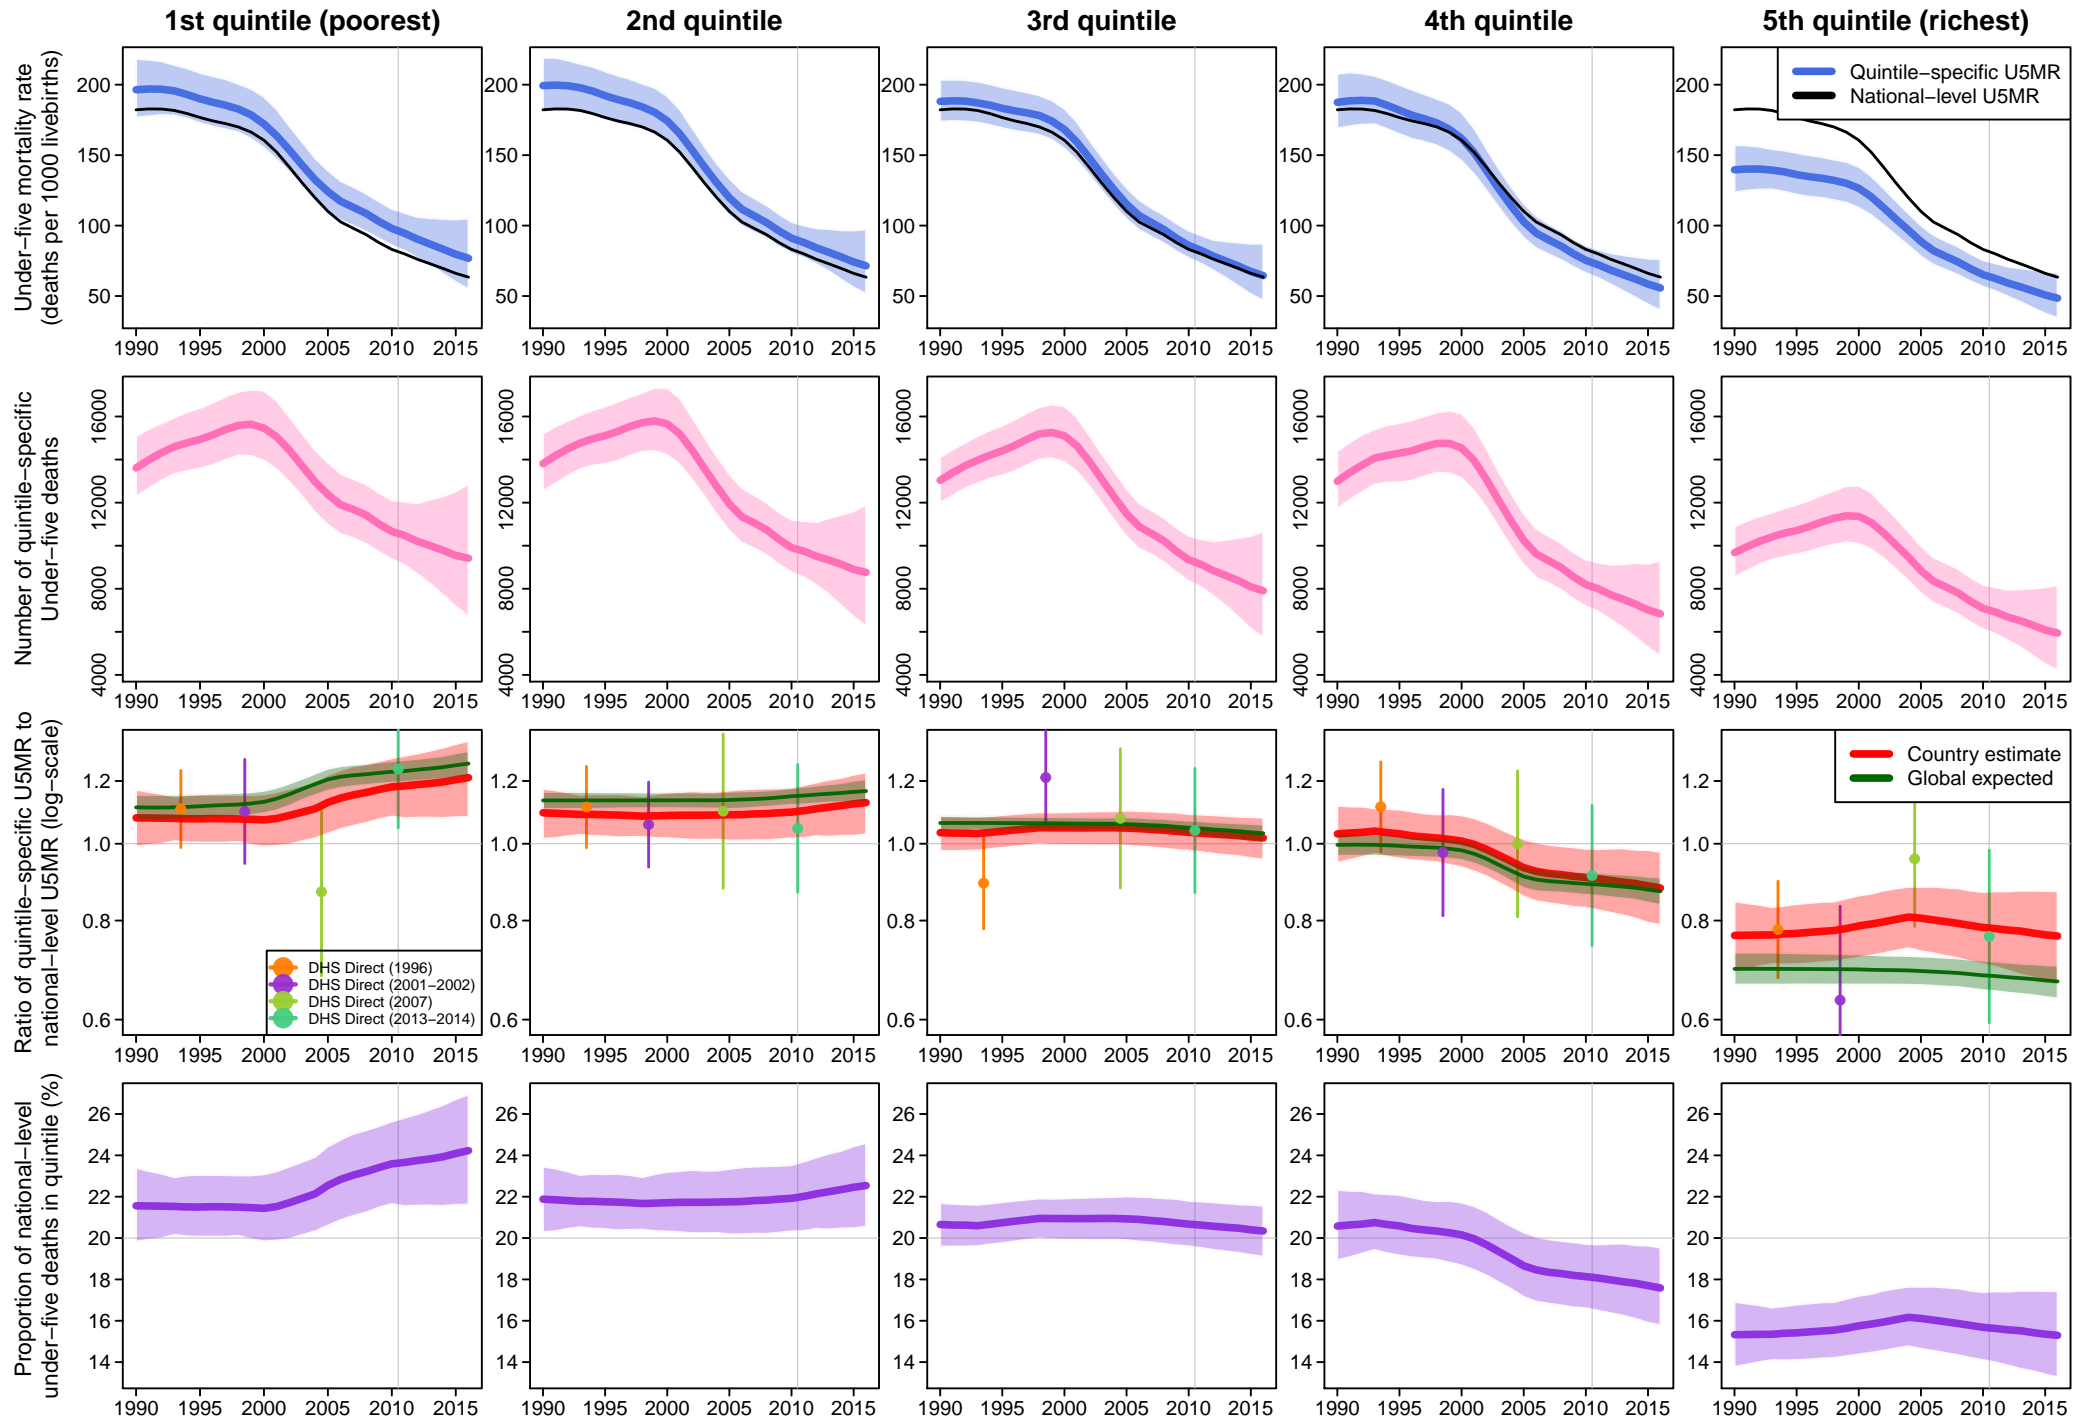

# Zimbabwe

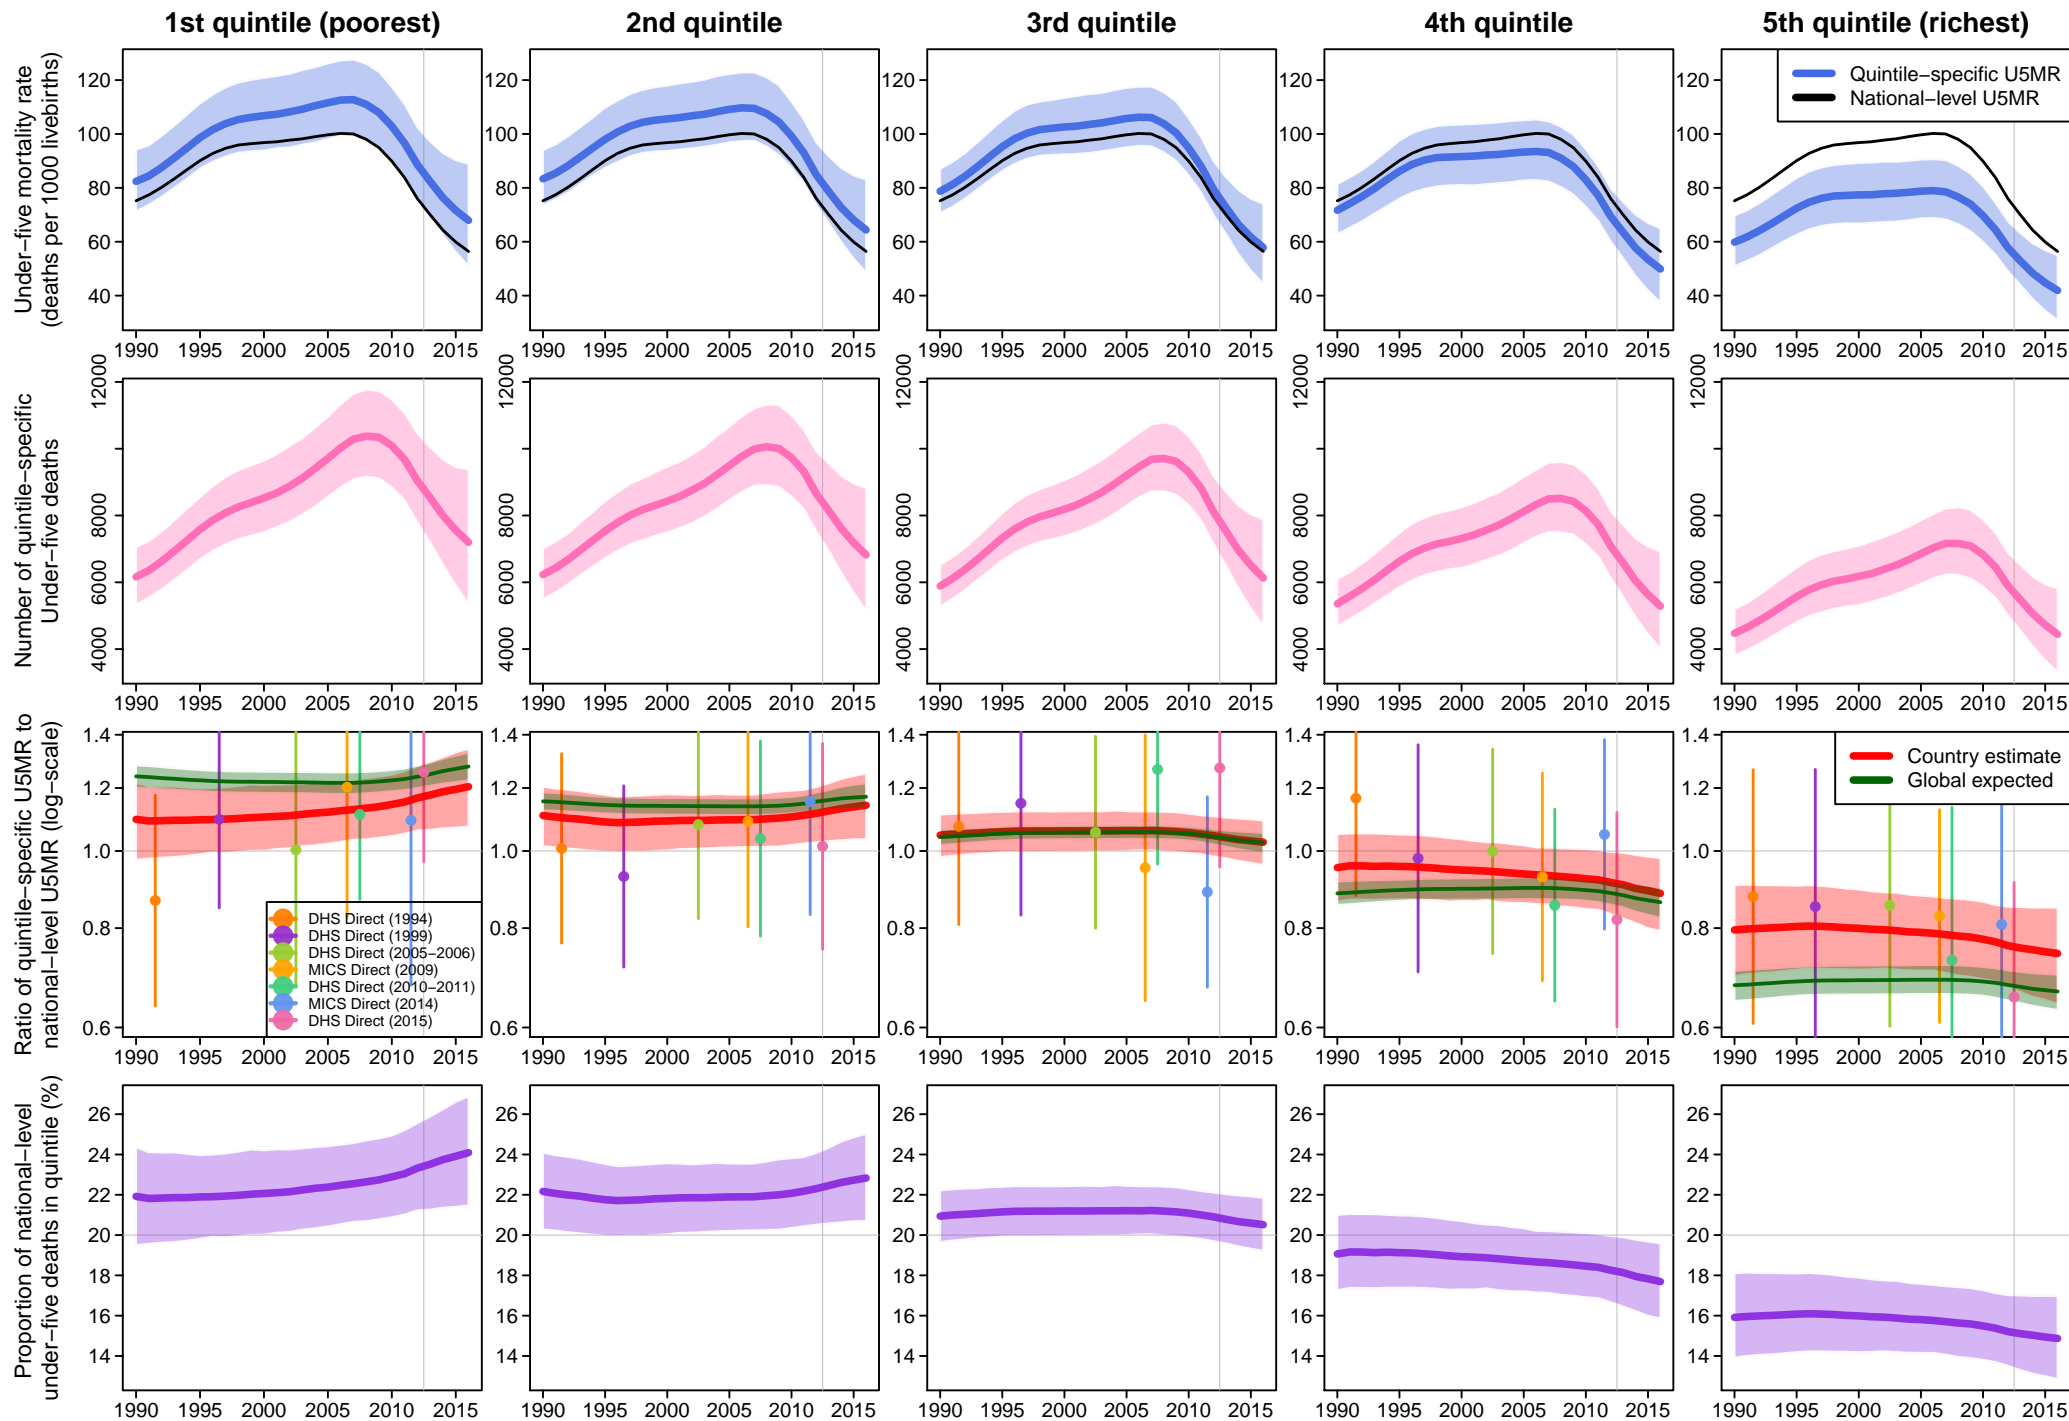

Supplement: mmc1.pdf [file mmc1.pdf]
